# Supplementary material for: Comprehensive annotation of secondary metabolite biosynthetic genes and gene clusters of Aspergillus nidulans, A. fumigatus, A. niger and A. oryzae
Source: PubMed Central journal article supplement (PMC3689640; doi:10.1186/1471-2180-13-91), 2013-04-26
Supplement: 1471-2180-13-91-S2.pdf [file 1471-2180-13-91-S2.pdf]

## **Additional file 2**

### **Comprehensive annotation of secondary metabolite biosynthetic genes and gene clusters of *Aspergillus nidulans*, *A. fumigatus*, *A. niger* and *A. oryzae***

Diane O. Inglis, Jon Binkley, Marek Skrzypek, Martha B. Arnaud, Gustavo Cerqueira, Prach Shah, Farrell Wymore, Jennifer R. Wortman and Gavin Sherlock

Abbreviations: ECS, end of cluster syntenly; IGD, increase in intergenic distance; FA, change in functional annotation; ED, experimentally determined, EP, expression profile (data from M. Andersen *et al*, 2013)

## Asperfuranone (afo) cluster

Experimentally determined cluster

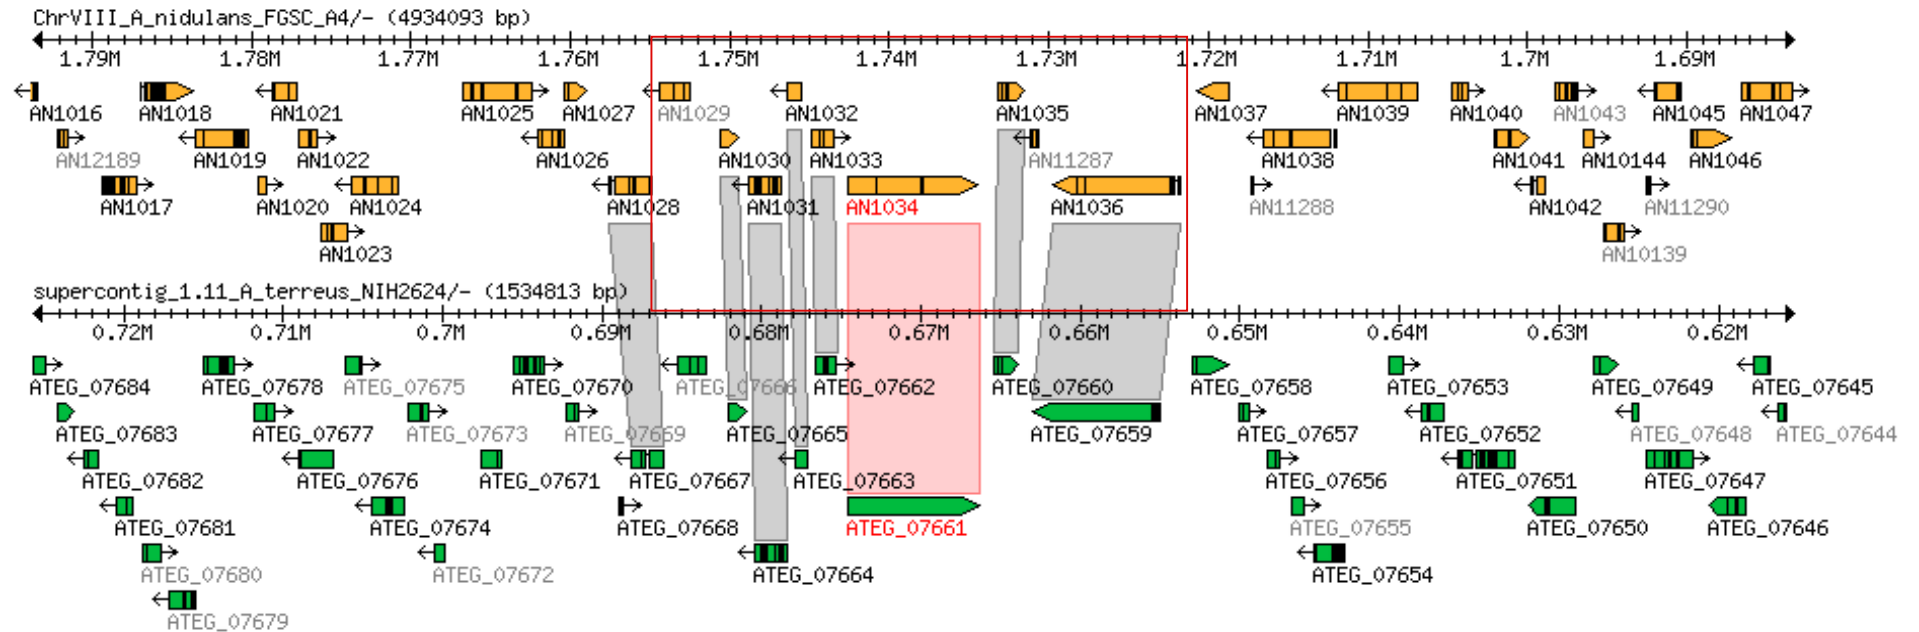

### Asperfuranone (afo) cluster

| Gene id (SMURF)* | Gene positions | Gene distance | Annotated_gene_function (SMURF)                                     | AspGD gene name | AspGD manual annotation and notes                | antiSMASH ID      | Gene ID       | Note |
|------------------|----------------|---------------|---------------------------------------------------------------------|-----------------|--------------------------------------------------|-------------------|---------------|------|
| n/a              |                |               |                                                                     |                 | Protein of unknown function                      | prot_ID_1671      | AN1026        |      |
| n/a              |                |               |                                                                     |                 | Protein of unknown function                      | prot_ID_448       | AN1027        |      |
| n/a              |                |               |                                                                     |                 | Zn(II)2Cys6 transcription factor                 | prot_ID_903       | AN1028        |      |
| AN1029.3         | 8              | 1371          | conserved hypothetical protein                                      | afoA            | Zn(II)2Cys6 domain transcription factor          | prot_ID_1382      | AN1029        | ED   |
| AN1030.3         | 7              | 592           | conserved hypothetical protein                                      |                 | Oxidoreductase                                   | prot_ID_664       | AN1030        |      |
| AN1031.3         | 6              | 385           | conserved hypothetical protein                                      | afoB            | Efflux pump                                      | prot_ID_1128      | AN1031        |      |
| AN1032.3         | 5              | 606           | hypothetical protein                                                | afoC            | Oxidoreductase                                   | prot_ID_1589      | AN1032        |      |
| AN1033.3         | 4              | 850           | hypothetical protein                                                | afoD            | Salicylate hydroxylase                           | prot_ID_364       | AN1033        |      |
| AN1034.3         | 3              | 528           | polyketide synthase                                                 | afoE            | Polyketide synthase                              | prot_ID_820       | AN1034        |      |
| AN1035.3         | 2              | 447           | FAD binding domain protein                                          | afoF            | FAD/FMN-dependent oxygenase                      | prot_ID_1293      | AN1035        |      |
| AN11287.3        | 1              | 918           | predicted protein                                                   |                 | Protein of unknown function                      | prot_ID_750       | AN11287       |      |
| <b>AN1036.3</b>  | 0              | 0             | polyketide synthase hypothetical protein similar to oleate delta-12 | afoG            | Polyketide synthase                              | <b>prot_ID_71</b> | <b>AN1036</b> | ED   |
| AN1037.3         | -1             | 1447          | desaturase                                                          | odeA            | Oleate delta-12 desaturase                       | prot_ID_524       | AN1037        |      |
| AN11288.3        | -2             | 1245          | predicted protein                                                   |                 | Protein of unknown function                      | prot_ID_1221      | AN11288       |      |
| n/a              |                |               |                                                                     |                 | Rab guanyl-nucleotide exchange factor            | prot_ID_988       | AN1038        |      |
| n/a              |                |               |                                                                     |                 | membrane-tethered transcription factor, putative | prot_ID_1462      | AN1039        |      |
| n/a              |                |               |                                                                     |                 | Protein of unknown function                      | prot_ID_739       | AN1040        |      |

## Asperthecin (apt) cluster

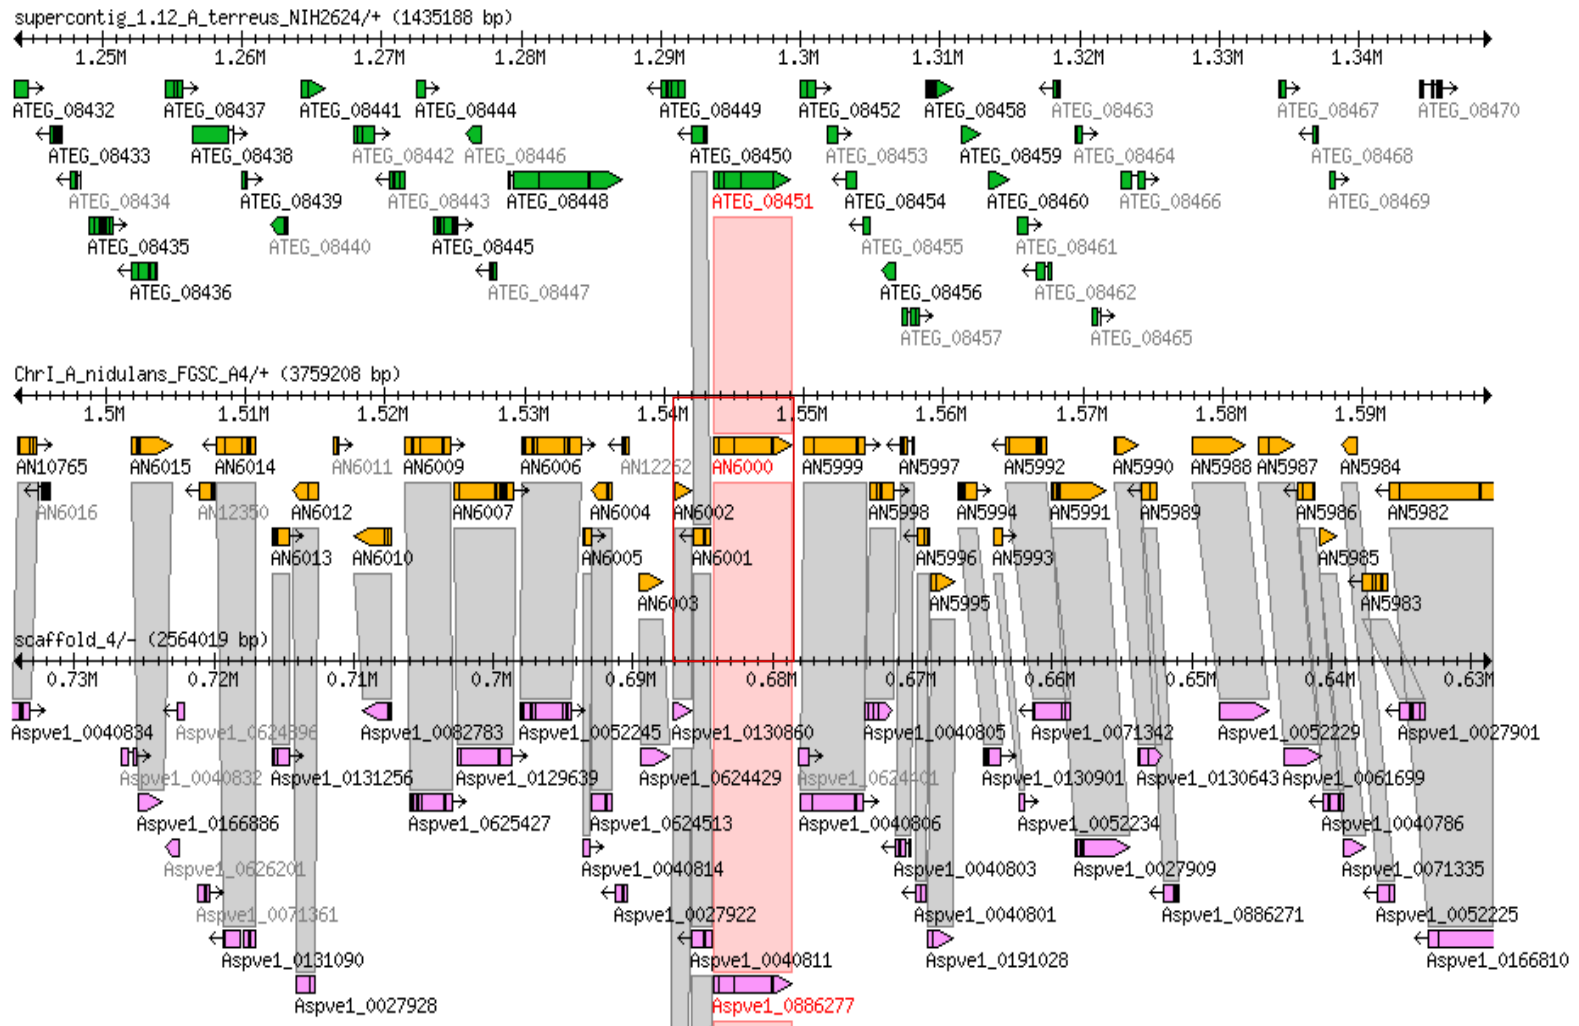

**Asperthecin  
(apt)  
cluster**

| Gene id<br>(SMURF)* | Gene<br>positions | Gene<br>distance | Annotated_gene_function<br>(SMURF) | AspGD<br>gene name | AspGD manual annotation and notes              | antiSMASH ID       | Gene ID       | Note |
|---------------------|-------------------|------------------|------------------------------------|--------------------|------------------------------------------------|--------------------|---------------|------|
| AN5989.3            | 11                | 113              | conserved hypothetical protein     |                    | NAD dependent epimerase/dehydratase            | n/a                | AN5989        |      |
| AN5990.3            | 10                | 662              | conserved hypothetical protein     |                    | Long-chain-fatty-acid-CoA ligase               | n/a                | AN5990        |      |
| AN5991.3            | 9                 | 400              | conserved hypothetical protein     | pexA               | long-chain-fatty-acid-CoA ligase               | prot_ID_370        | AN5991        |      |
| AN5992.3            | 8                 | 466              | conserved hypothetical protein     |                    | DNA replication licensing factor               | Mcm7 prot_ID_1055  | AN5992        |      |
| AN5993.3            | 7                 | 1156             | hypothetical protein               |                    | Putative adhesion                              | prot_ID_490        | AN5993        |      |
| AN5994.3            | 6                 | 258              | conserved hypothetical protein     |                    | ATP-dependent NAD(P)H-hydrate<br>dehydratase   | prot_ID_1176       | AN5994        |      |
| AN5995.3            | 5                 | 242              | hypothetical protein               |                    | Protein of unknown function                    | prot_ID_616        | AN5995        |      |
| AN5996.3            | 4                 | 96               | hypothetical protein               |                    | 60S acidic ribosomal protein P2                | prot_ID_53         | AN5996        |      |
| AN5997.3            | 3                 | 395              | 40S ribosomal protein S15          |                    | 40S ribosomal protein S15                      | prot_ID_736        | AN5997        |      |
| AN5998.3            | 2                 | 482              | conserved hypothetical protein     |                    | SET and MYND domain protein                    | prot_ID_169        | AN5998        |      |
| AN5999.3            | 1                 | 1256             | conserved hypothetical protein     |                    | Carbamoyl-phosphate synthase, large<br>subunit | prot_ID_856        | AN5999        |      |
| <b>AN6000.3</b>     | 0                 | 0                | polyketide synthase                | aptA               | <b>Polyketide synthase</b>                     | <b>prot_ID_873</b> | <b>AN6000</b> | ED   |
| AN6001.3            | -1                | 433              | conserved hypothetical protein     | aptB               | <b>Hydrolase</b>                               | prot_ID_303        | AN6001        |      |
| AN6002.3            | -2                | 146              | conserved hypothetical protein     | aptC               | <b>Monooxygenase</b>                           | prot_ID_991        | AN6002        | ED   |
| AN6003.3            | -3                | 803              | conserved hypothetical protein     |                    | Protein of unknown function                    | prot_ID_428        | AN6003        |      |
| n/a                 |                   |                  |                                    |                    | Protein of unknown function                    | prot_ID_1284       | AN12262       |      |
| AN6004.3            | -4                | 1947             | conserved hypothetical protein     |                    | actin cytoskeleton protein                     | prot_ID_1114       | AN6004        |      |
| AN6005.3            | -5                | 81               | conserved hypothetical protein     |                    | Protein of unknown function                    | prot_ID_554        | AN6005        |      |
| AN6006.3            | -6                | 920              | conserved hypothetical protein     | kapD               | Karyopherin                                    | prot_ID_1235       | AN6006        |      |
| AN6007.3            | -7                | 547              | conserved hypothetical protein     |                    | ATP binding, ATP-dependent helicase            | prot_ID_676        | AN6007        |      |
| n/a                 |                   |                  |                                    |                    | AN6008 was merged into AN6009                  | prot_ID_793        | AN6009        |      |

# Aspyridone (asp) cluster

Experimentally determined cluster

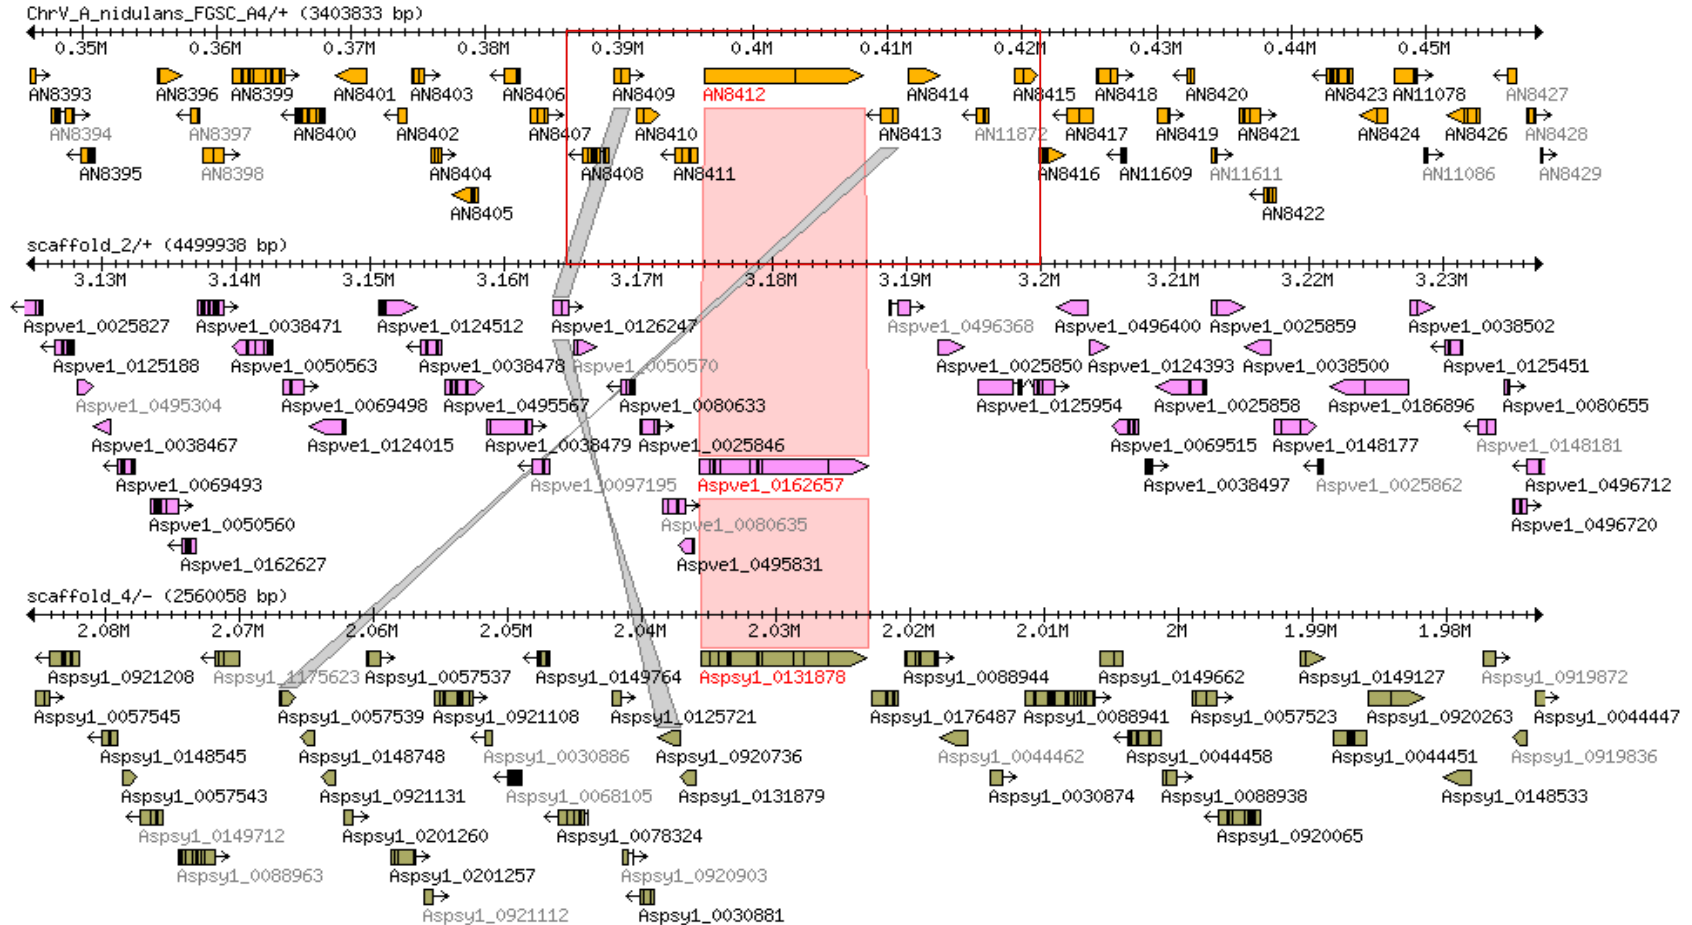

### Aspyridone (asp) cluster

| Gene id (SMURF)* | Gene positions | Gene distance | Annotated_gene_function (SMURF)   | AspGD gene name | AspGD manual annotation and notes                                                                            | antiSMASH ID        | Gene ID       | Note |
|------------------|----------------|---------------|-----------------------------------|-----------------|--------------------------------------------------------------------------------------------------------------|---------------------|---------------|------|
| AN8398.3         | 15             | 519           | conserved hypothetical protein    |                 | Oxidoreductase                                                                                               | n/a                 | AN8398        |      |
| AN8399.3         | 14             | 917           | conserved hypothetical protein    |                 | Potassium-transporting ATPase                                                                                | n/a                 | AN8399        |      |
| AN8400.3         | 13             | 749           | conserved hypothetical protein    |                 | Sugar transporter                                                                                            | n/a                 | AN8400        |      |
| AN8401.3         | 12             | 2428          | conserved hypothetical protein    |                 | Alpha-N-arabinofuranosidase                                                                                  | n/a                 | AN8401        |      |
| AN8402.3         | 11             | 414           | conserved hypothetical protein    |                 | Protein of unknown function                                                                                  | n/a                 | AN8402        |      |
| AN8403.3         | 10             | 441           | conserved hypothetical protein    |                 | Oxidoreductase                                                                                               | n/a                 | AN8403        |      |
| AN8404.3         | 9              | 466           | conserved hypothetical protein    |                 | Protease inhibitor                                                                                           | prot_ID_1032        | AN8404        |      |
| AN8405.3         | 8              | 1805          | conserved hypothetical protein    |                 | Monooxygenase                                                                                                | prot_ID_572         | AN8405        |      |
| AN8406.3         | 7              | 873           | conserved hypothetical protein    |                 | Alcohol dehydrogenase                                                                                        | prot_ID_105         | AN8406        |      |
| AN8407.3         | 6              | 1841          | conserved hypothetical protein    |                 | Protein of unknown function                                                                                  | prot_ID_676         | AN8407        |      |
| AN11607.3        | 5              | 365           | predicted protein cytochrome P450 |                 | Protein of unknown function                                                                                  |                     |               |      |
| AN8408.3         | 4              | 367           | oxidoreductase                    | apdB            | cytochrome P450                                                                                              | prot_ID_206         | AN8408        | ED   |
| AN8409.3         | 3              | 203           | conserved hypothetical protein    | apdC            | enoyl reductase                                                                                              | prot_ID_776         | AN8409        |      |
| AN8410.3         | 2              | 1116          | conserved hypothetical protein    | apdD            | FAD-dependent monooxygenase                                                                                  | prot_ID_931         | AN8410        |      |
| AN8411.3         | 1              | 476           | hypothetical protein              | apdE            | Cytochrome P450 monooxygenase<br>Hybrid polyketide synthase-<br>nonribosomal peptide synthase (PKS-<br>NRPS) | prot_ID_476         | AN8411        |      |
| <b>AN8412.3</b>  | 0              | 0             | hybrid PKS-NRPS                   | apdA            |                                                                                                              | <b>prot_ID_1031</b> | <b>AN8412</b> |      |
| AN8413.3         | -1             | 284           | conserved hypothetical protein    | apdF            | Exporter                                                                                                     | prot_ID_571         | AN8413        |      |
| AN8414.3         | -2             | 826           | conserved hypothetical protein    | apdR            | Zn(II)2Cys6 transcription factor                                                                             | prot_ID_104         | AN8414        |      |
| AN11608.3        | -3             | 1963          | predicted protein                 |                 | Protein of unknown function                                                                                  | prot_ID_1041        | AN11872       |      |
| AN8415.3         | -4             | 3186          | conserved hypothetical protein    | apdG            | Acyl-coA dehydrogenase                                                                                       | prot_ID_675         | AN8415        | ED   |
| n/a              |                |               |                                   | furE            | Transporter                                                                                                  | prot_ID_204         | AN8416        |      |
| n/a              |                |               |                                   |                 | Hydrolase                                                                                                    | prot_ID_774         | AN8417        |      |
| n/a              |                |               |                                   |                 | Hydrolase                                                                                                    | prot_ID_306         | AN8418        |      |
| n/a              |                |               |                                   |                 |                                                                                                              | prot_ID_905         | AN11609       |      |

## Austinol (aus) cluster 1

Experimentally determined cluster

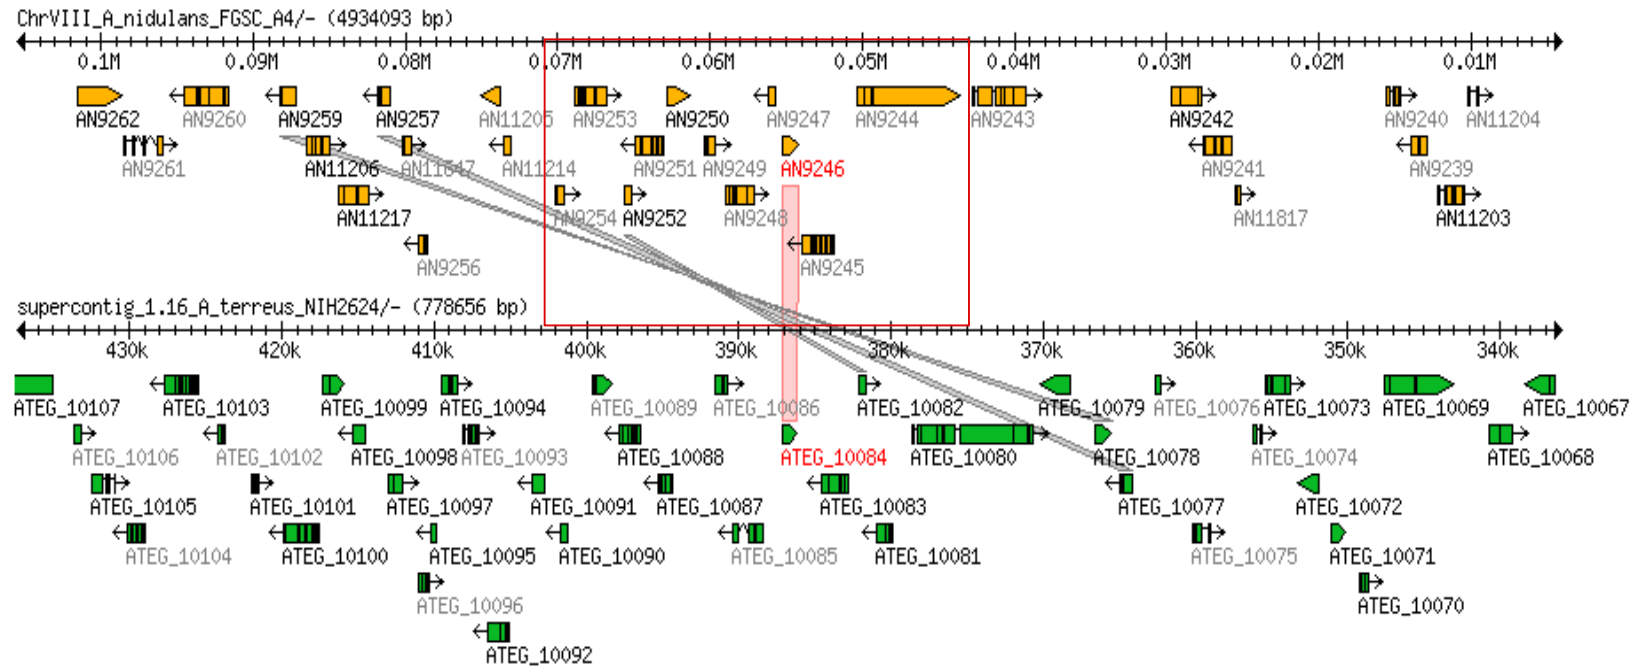



### Austinol (aus) AN9244 cluster

| Gene id (SMURF)* | Gene positions | Gene distance (SMURF) | Annotated_gene_function                        | AspGD gene name | AspGD manual annotation and notes                                               | antiSMASH ID        | Gene ID       |        |
|------------------|----------------|-----------------------|------------------------------------------------|-----------------|---------------------------------------------------------------------------------|---------------------|---------------|--------|
| n/a              |                |                       |                                                |                 | Protein of unknown function                                                     | prot_ID_1713        | AN11817       |        |
| n/a              |                |                       |                                                |                 | Protein of unknown function                                                     | prot_ID_1399        | AN9241        |        |
| n/a              |                |                       |                                                |                 | Protein of unknown function                                                     | prot_ID_168         | AN9242        |        |
| AN9243.3         | 1              | 965                   | NRPS-like enzyme nonribosomal peptide synthase |                 | Protein of unknown function                                                     | prot_ID_625         | AN9243        |        |
| <b>AN9244.3</b>  | 0              | 0                     |                                                |                 | <b>Nonribosomal peptide synthase 3-oxoacyl-[acyl-carrier-protein] reductase</b> | <b>prot_ID_1091</b> | <b>AN9244</b> | ED, FA |
| AN9245.3         | -1             | 1507                  | fatty acid synthase                            |                 |                                                                                 | prot_ID_1559        | AN9245        |        |
| AN9246.3         | -2             | 328                   | conserved hypothetical protein                 | ausE            | Dioxygenase                                                                     | prot_ID_332         | AN9246        |        |
| AN9247.3         | -3             | 361                   | conserved hypothetical protein                 | ausF            | Protein of unknown function                                                     | prot_ID_787         | AN9247        |        |
| AN9248.3         | -4             | 983                   | conserved hypothetical protein                 | (ausG)          | CYP650B1<br>Cytochrome P450                                                     | prot_ID_1263        | AN9248        |        |
| AN9249.3         | -5             | 587                   | conserved hypothetical protein                 | ausH            | Protein of unknown function                                                     | prot_ID_39          | AN9249        |        |
| AN9250.3         | -6             | 918                   | conserved hypothetical protein                 |                 | O-acetyltransferase                                                             | prot_ID_1006        | AN9250        |        |
| AN9251.3         | -7             | 209                   | conserved hypothetical protein                 | CYP650A1        | Cytochrome P450                                                                 | prot_ID_1479        | AN9251        |        |
| n/a              |                |                       |                                                |                 | Protein of unknown function                                                     | prot_ID_254         | AN9252        |        |
| n/a              |                |                       |                                                | CYP651A1 (ausI) | Cytochrome P450                                                                 | prot_ID_706         | AN9253        | ED     |
| n/a              |                |                       |                                                |                 | Protein of unknown function                                                     | prot_ID_1176        | AN9254        |        |

## Austinol (aus) cluster 2

Experimentally determined cluster

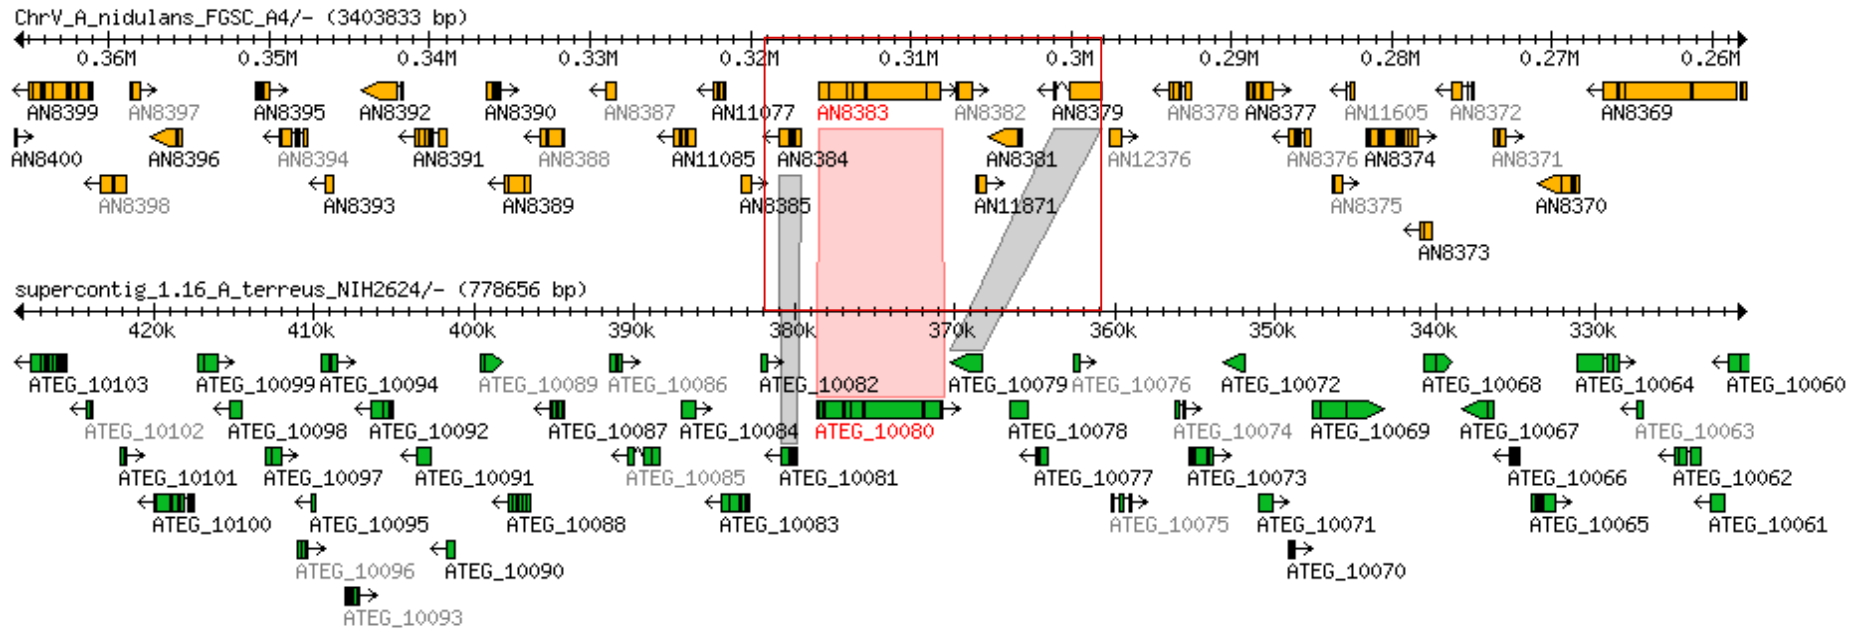

### Austinol (aus) cluster

| Gene id (SMURF)* | Gene positions | Gene distance (SMURF) | Annotated_gene_function        | AspGD gene name | AspGD manual annotation and notes | antiSMASH ID      | Gene ID       |         |
|------------------|----------------|-----------------------|--------------------------------|-----------------|-----------------------------------|-------------------|---------------|---------|
| n/a              |                |                       |                                |                 | Myb-like transcription factor     | prot_ID_161       | AN8377        |         |
| n/a              |                |                       |                                |                 | Monoxygenase                      | prot_ID_734       | AN8378        |         |
| n/a              |                |                       |                                |                 | Oxidoreductase                    | prot_ID_1052      | AN12376       |         |
| n/a              |                |                       |                                | ausB            | Oxidoreductase                    | prot_ID_267       | AN8379        | ED, ECS |
| n/a              |                |                       |                                | ausC            | Protein of unknown function       | prot_ID_995       | AN8381        |         |
| n/a              |                |                       |                                |                 | Protein of unknown function       | prot_ID_1056      | AN11871       |         |
| AN8382.3         | 1              | 906                   | hypothetical protein           |                 | Protein of unknown function       | prot_ID_540       | AN8382        |         |
| <b>AN8383.3</b>  | 0              | 0                     | polyketide synthase            | ausA            | Polyketide synthase               | <b>prot_ID_62</b> | <b>AN8383</b> |         |
| AN8384.3         | -1             | 1159                  | conserved hypothetical protein | ausD            | Protein of unknown function       | prot_ID_635       | AN8384        | ED, ECS |
| AN8385.3         | -2             | 1832                  | conserved hypothetical protein |                 | Protein of unknown function       | prot_ID_159       | AN8385        |         |
| AN11077.3        | -3             | 955                   | conserved hypothetical protein |                 | Acetyltransferase                 | prot_ID_519       | AN11077       |         |
| AN11085.3        | -4             | 1315                  | conserved hypothetical protein |                 | D-arabinitol 4-dehydrogenase      | prot_ID_518       | AN11085       |         |
| AN8387.3         | -5             | 3635                  | conserved hypothetical protein |                 | Protein of unknown function       | prot_ID_263       | AN8387        |         |
| AN8388.3         | -6             | 2608                  | conserved hypothetical protein |                 | Protein of unknown function       | prot_ID_833       | AN8388        |         |
| AN8389.3         | -7             | 673                   | conserved hypothetical protein |                 | Predicted acid phosphatase        | prot_ID_366       | AN8389        |         |
| AN8390.3         | -8             | 149                   | conserved hypothetical protein |                 | GPR1/FUN34/YaaH family member     | prot_ID_538       | AN8390        |         |
| AN8391.3         | -9             | 2505                  | conserved hypothetical protein |                 | Zn(II)2Cys6 transcription factor  | n/a               | AN8391        |         |
| AN8392.3         | -10            | 840                   | conserved hypothetical protein |                 | Alpha-glycosidase                 | n/a               | AN8392        |         |
| AN8393.3         | -11            | 1834                  | conserved hypothetical protein |                 | Protein of unknown function       | n/a               | AN8393        |         |
| AN8394.3         | -12            | 1349                  | conserved hypothetical protein |                 | Transmembrane transporter         | n/a               | AN8394        |         |
| AN8395.3         | -13            | 328                   | conserved hypothetical protein |                 | Peroxidase                        | n/a               | AN8395        |         |

## Combined Derivative of BenzAldehyde1 (dba) and F9775 clusters 1 and 2

Experimentally determined cluster

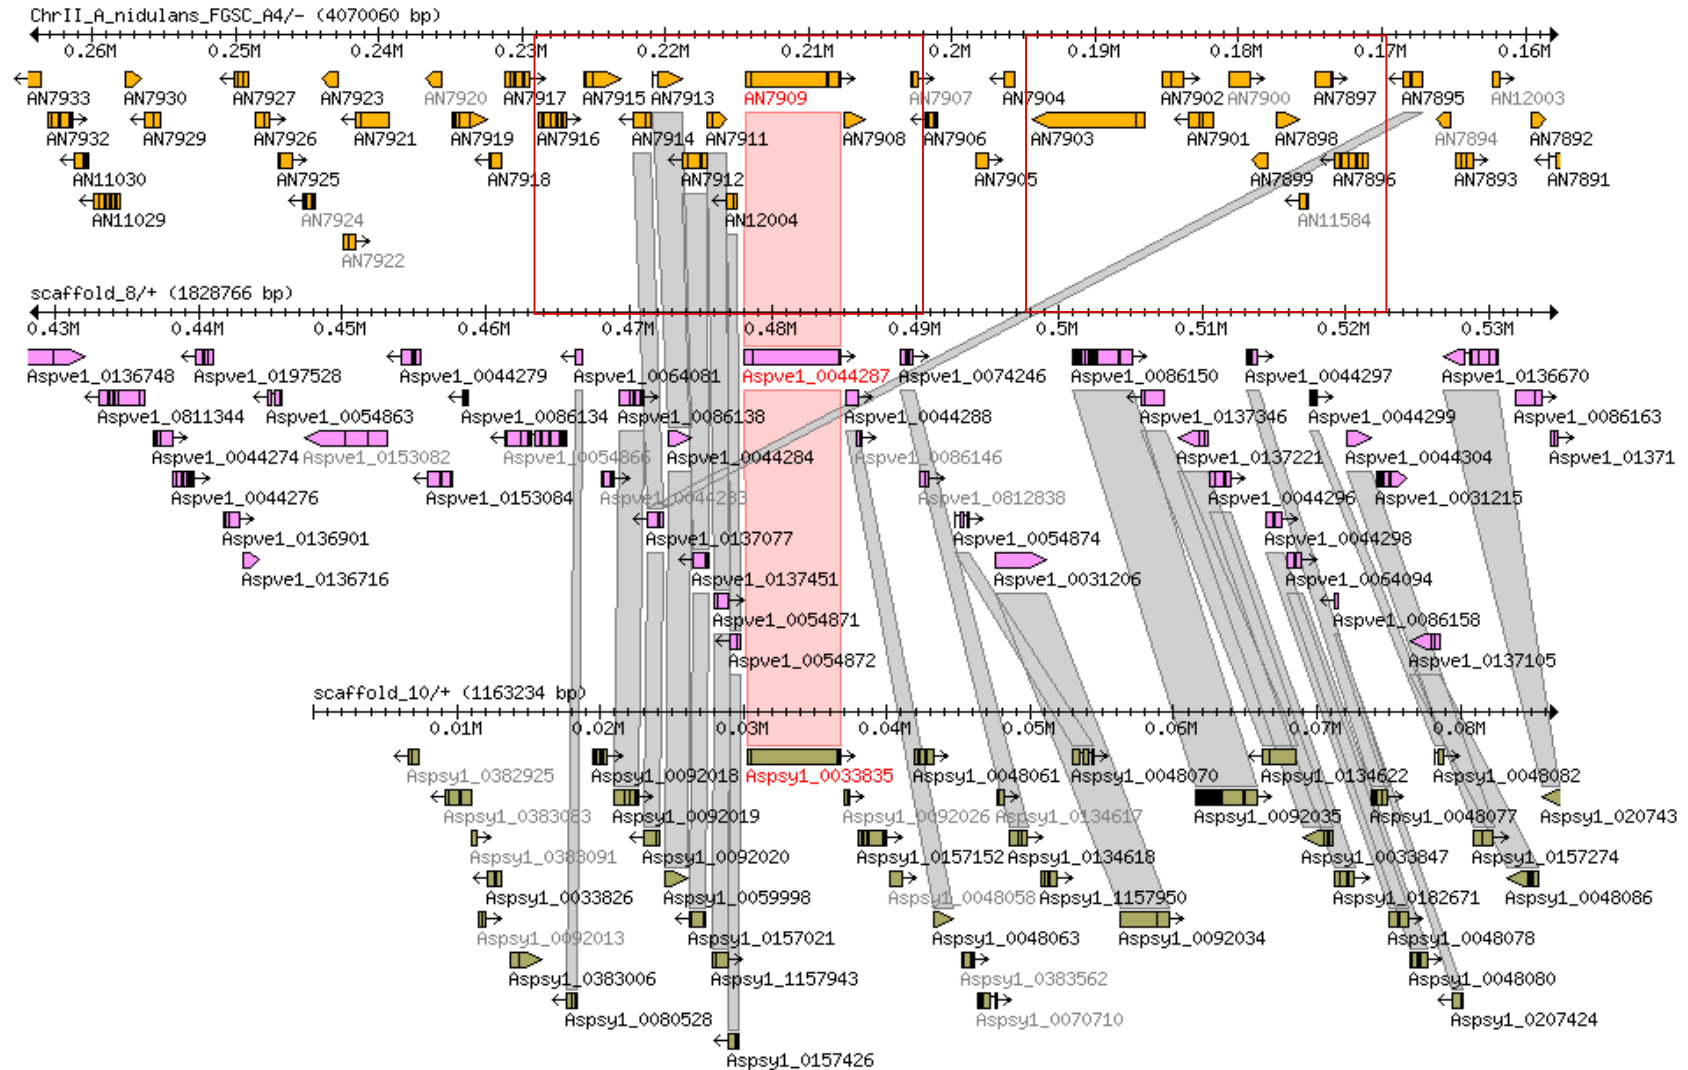

### Combined Derivative of BenzAldehyde1 (dba) and F9775 clusters

| Gene id (SMURF)* | Gene positions | Gene distance (SMURF) | Annotated_gene_function        | AspGD gene name | AspGD manual annotation and notes                                                | antiSMASH ID       | Gene ID       |                   |
|------------------|----------------|-----------------------|--------------------------------|-----------------|----------------------------------------------------------------------------------|--------------------|---------------|-------------------|
| n/a              |                |                       |                                | cipB            | oxidoreductase                                                                   | prot_ID_1082       | AN7895        |                   |
| n/a              |                |                       |                                | dbaA            | Zn(II)2Cys6 transcription factor                                                 | prot_ID_465        | AN7896        | ED, cluster 1     |
| n/a              |                |                       |                                | dbaB            | FAD-binding monooxygenase                                                        | prot_ID_1211       | AN7897        |                   |
| n/a              |                |                       |                                | dbaC            | YCII domain protein                                                              | prot_ID_983        | AN11584       |                   |
| n/a              |                |                       |                                | dbaD            | MFS transporter                                                                  | prot_ID_594        | AN7898        |                   |
| n/a              |                |                       |                                | dbaE            | Esterase/lipase                                                                  | prot_ID_1344       | AN7899        |                   |
| n/a              |                |                       |                                | dbaF            | Oxidoreductase                                                                   | prot_ID_475        | AN7900        |                   |
| n/a              |                |                       |                                | dbaG            | C6 transcription factor                                                          | prot_ID_1221       | AN7901        |                   |
| n/a              |                |                       |                                | dbaH            | FAD-binding monooxygenase                                                        | prot_ID_605        | AN7902        |                   |
| n/a              |                |                       |                                | pkeA/dbaI       | Polyketide synthase                                                              | prot_ID_5          | <b>AN7903</b> | ED, EP, cluster 1 |
| n/a              |                |                       |                                |                 | S-adenosylmethionine-dependent methyltransferase                                 | prot_ID_735        | AN7904        |                   |
| AN7905.3         | 4              | 2662                  | conserved hypothetical protein |                 | Phosphogluconate dehydrogenase                                                   | prot_ID_127        | AN7905        |                   |
| AN7906.3         | 3              | 461                   | conserved hypothetical protein |                 | Protein of unknown function                                                      | prot_ID_867        | AN7906        |                   |
| AN7907.3         | 2              | 3221                  | conserved hypothetical protein |                 | Glyoxylate-bleomycin resistance protein, F9775 secondary metabolite gene cluster | prot_ID_257        | AN7907        | ED, cluster 2     |
| AN7908.3         | 1              | 267                   | conserved hypothetical protein |                 | Type II fatty acid synthase, F9775 secondary metabolite gene cluster             | prot_ID_1005       | AN7908        |                   |
| <b>AN7909.3</b>  | 0              | 0                     | polyketide synthase            | <b>orsA</b>     | Polyketide synthase, F9775 secondary metabolite gene cluster                     | <b>prot_ID_387</b> | <b>AN7909</b> |                   |
| <b>n/a</b>       |                |                       |                                |                 | Protein of unknown function, F9775 secondary metabolite gene cluster             | prot_ID_1413       | AN12004       |                   |
| AN7911.3         | -1             | 1512                  | conserved hypothetical protein | <b>orsB</b>     | Amidohydrolase, F9775 secondary metabolite gene cluster                          | prot_ID_4          | AN7911        |                   |
| AN7912.3         | -2             | 358                   | conserved hypothetical protein | <b>orsC</b>     | Tyrosinase, F9775 secondary metabolite gene cluster                              | prot_ID_733        | AN7912        |                   |
| AN7913.3         | -3             | 521                   | conserved hypothetical protein |                 | Protein of unknown function                                                      | prot_ID_126        | AN7913        |                   |
| AN7914.3         | -4             | 427                   | conserved hypothetical protein |                 | Alcohol dehydrogenase, F9775 secondary metabolite gene cluster                   | prot_ID_865        | AN7914        |                   |
| AN7915.3         | -5             | 909                   | conserved hypothetical protein |                 | Glucosidase, F9775 secondary metabolite gene cluster                             | prot_ID_254        | AN7915        |                   |

|          |     |      |                                |                                   |              |        |               |
|----------|-----|------|--------------------------------|-----------------------------------|--------------|--------|---------------|
| AN7916.3 | -6  | 1240 | conserved hypothetical protein | Amino acid transporter, F9775     | prot_ID_1003 | AN7916 | ED, cluster 2 |
| AN7917.3 | -7  | 614  | conserved hypothetical protein | secondary metabolite gene cluster | prot_ID_385  | AN7917 |               |
| AN7918.3 | -8  | 502  | conserved hypothetical protein | oxidoreductase                    | prot_ID_1134 | AN7918 |               |
| AN7919.3 | -9  | 40   | conserved hypothetical protein | Protein of unknown function       | prot_ID_519  | AN7919 |               |
| AN7920.3 | -10 | 632  | conserved hypothetical protein | Zn(II)2Cys6 transcription factor  | n/a          | AN7920 |               |
| AN7921.3 | -11 | 2656 | conserved hypothetical protein | Hydrolase                         | n/a          | AN7921 |               |
| AN7922.3 | -12 | 217  | conserved hypothetical protein | Zn(II)2Cys6 transcription factor  | n/a          | AN7922 |               |
| AN7923.3 | -13 | 318  | conserved hypothetical protein | Riboflavin reductase              | n/a          | AN7923 |               |
|          |     |      |                                | Zn(II)2Cys6 transcription factor  | n/a          |        |               |

## Emericellamide (eas) cluster

Experimentally characterized cluster

AN2546 - uncharacterized cluster member

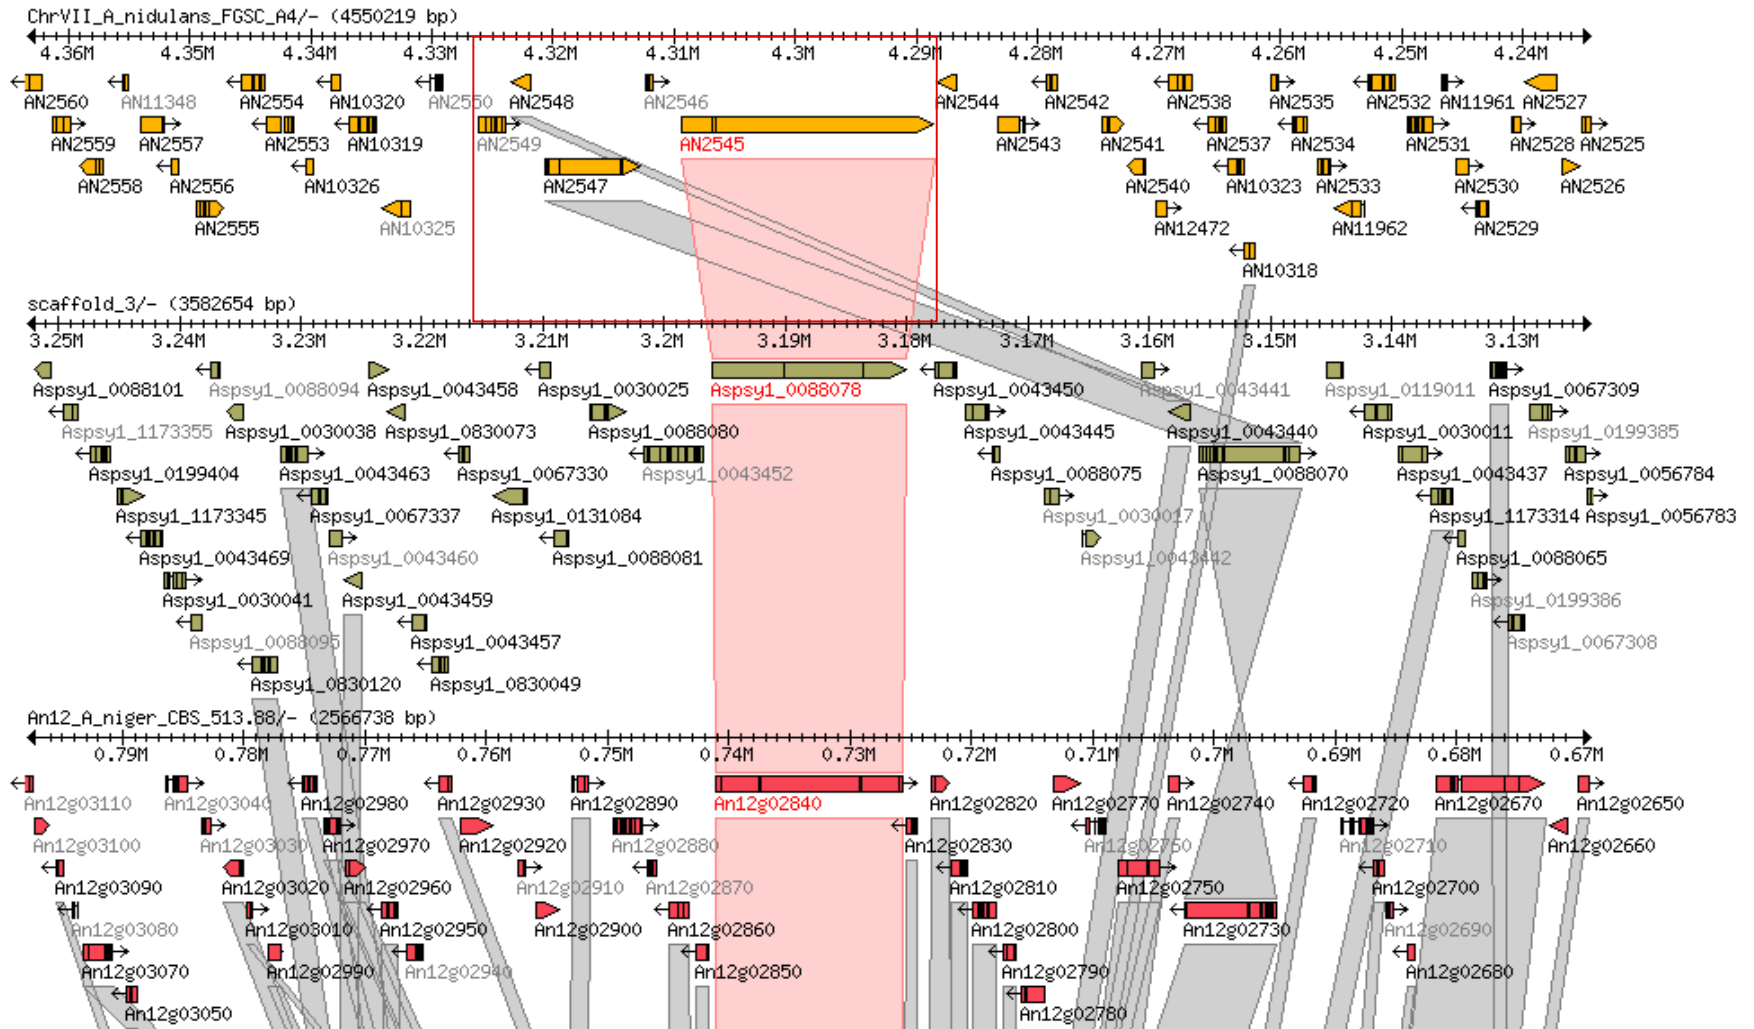

### Emericellamide (eas) cluster

| Gene id (SMURF)* | Gene positions | Gene distance (SMURF) | Annotated_gene_function                                      | AspGD gene name | AspGD manual annotation and notes                                          | antiSMASH ID        | Gene ID       |    |
|------------------|----------------|-----------------------|--------------------------------------------------------------|-----------------|----------------------------------------------------------------------------|---------------------|---------------|----|
| n/a              |                |                       |                                                              |                 | Protein of unknown function                                                | prot_ID_306         | AN2538        |    |
| n/a              |                |                       |                                                              |                 | AN2539 and AN9518 were merged (and consequently deleted) to create AN12472 | prot_ID_1583        | AN2539        |    |
| n/a              |                |                       |                                                              |                 | Hydrolase                                                                  |                     | AN12472       |    |
| n/a              |                |                       |                                                              |                 | Protein of unknown function                                                | prot_ID_1360        | AN2540        |    |
| n/a              |                |                       |                                                              |                 | Alpha-N-arabinofuranosidase                                                | prot_ID_690         | AN2541        |    |
| n/a              |                |                       |                                                              |                 | Pectate lyase                                                              | prot_ID_22          | AN2542        |    |
| n/a              |                |                       |                                                              | plyD            | Rhamnogalacturonan lyase                                                   | prot_ID_836         | AN2543        |    |
| AN2544.3         | 3              | 140                   | conserved hypothetical protein nonribosomal peptide synthase |                 | Transmembrane transporter                                                  | prot_ID_161         | AN2544        |    |
| AN2545.3         | 2              | 2252                  |                                                              | easA            | Nonribosomal peptide synthetase                                            | prot_ID_980         | AN2545        | ED |
| AN2546.3         | 1              | 699                   | hypothetical protein                                         |                 | Glycosylphosphatidylinositol (GPI)-anchored protein                        | prot_ID_304         | AN2546        |    |
| <b>AN2547.3</b>  | 0              | 0                     | polyketide synthase                                          | easB            | Polyketide synthase                                                        | <b>prot_ID_1120</b> | <b>AN2547</b> |    |
| AN2548.3         | -1             | 957                   | conserved hypothetical protein                               | easC            | Acyltransferase                                                            | prot_ID_452         | AN2548        |    |
| AN2549.3         | -2             | 473                   | conserved hypothetical protein                               | easD            | Acyl-CoA ligase                                                            | prot_ID_1260        | AN2549        | ED |
| AN2550.3         | -3             | 3294                  | conserved hypothetical protein                               |                 | Protein of unknown function                                                | prot_ID_21          | AN2550        |    |
| AN10325.3        | -4             | 1645                  | conserved hypothetical protein                               |                 | Tyrosine kinase                                                            | prot_ID_212         | AN10325       |    |
| AN10319.3        | -5             | 530                   | conserved hypothetical protein                               |                 | Transmembrane transporter                                                  | prot_ID_365         | AN10319       |    |
| AN10320.3        | -6             | 1169                  | conserved hypothetical protein                               |                 | Protein of unknown function                                                | prot_ID_597         | AN10320       |    |
| AN10326.3        | -7             | 1474                  | conserved hypothetical protein                               |                 | Protein of unknown function                                                | prot_ID_1033        | AN10326       |    |
| AN2553.3         | -8             | 901                   | conserved hypothetical protein                               |                 | Zn(II)2Cys6 transcription factor                                           | n/a                 | AN2553        |    |



# inp cluster

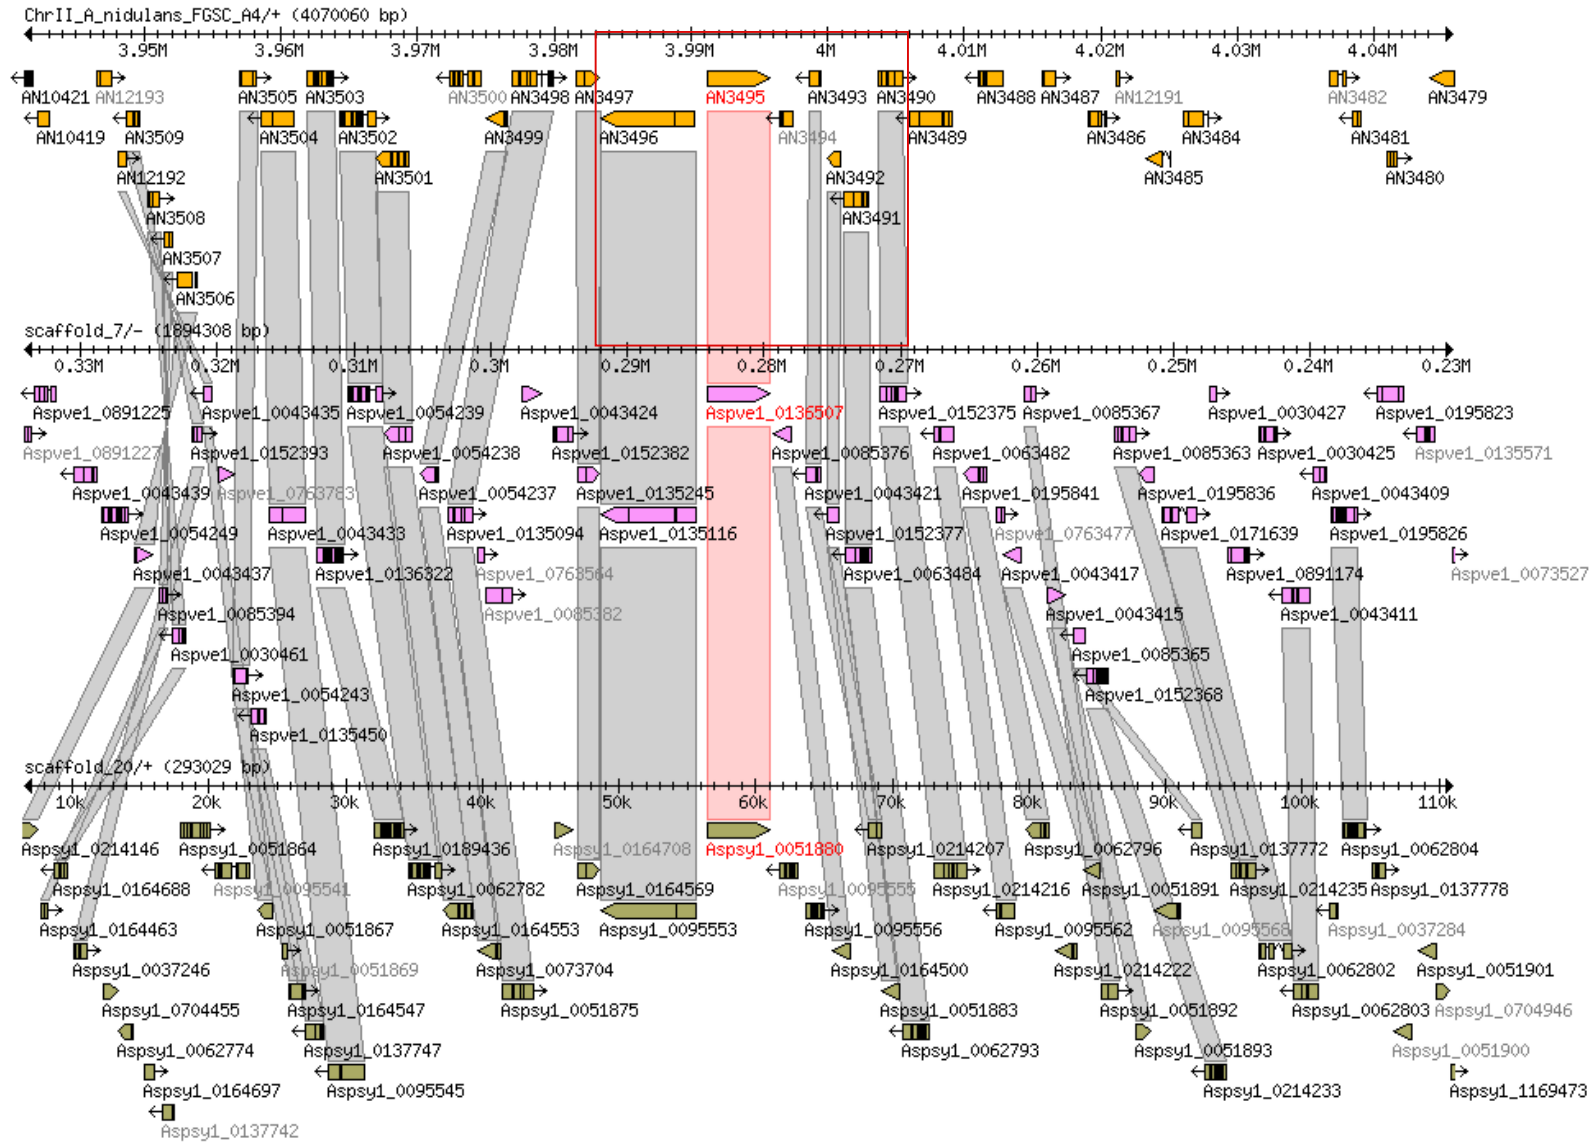

**inp  
cluster**

| Gene id (SMURF)* | Gene positions | Gene distance | Annotated_gene_function (SMURF)                                        | AspGD gene name | AspGD manual annotation and notes                   | antiSMASH ID        | Gene ID       |    |
|------------------|----------------|---------------|------------------------------------------------------------------------|-----------------|-----------------------------------------------------|---------------------|---------------|----|
| n/a              |                |               |                                                                        |                 | Protein of unknown function                         | n/a                 | AN3484        |    |
| n/a              |                |               |                                                                        |                 | Protein of unknown function                         | prot_ID_160         | AN3485        |    |
| n/a              |                |               |                                                                        |                 | Protein of unknown function                         | prot_ID_1441        | AN12191       |    |
| n/a              |                |               |                                                                        |                 | Protein of unknown function                         | prot_ID_899         | AN3486        |    |
| n/a              |                |               |                                                                        |                 | Protein of unknown function                         | prot_ID_286         | AN3487        |    |
| n/a              |                |               |                                                                        |                 | N,N-dimethylaniline monooxygenase                   | prot_ID_1033        | AN3488        |    |
| n/a              |                |               |                                                                        |                 | Ortholog(s) have endoplasmic reticulum localization | prot_ID_415         | AN3489        |    |
| n/a              |                |               |                                                                        |                 | Protein of unknown function                         | prot_ID_633         | AN3490        | EP |
| AN3491.3         | 5              | 403           | conserved hypothetical protein                                         | scpR            | Transmembrane transporter                           | prot_ID_33          | AN3491        |    |
| AN3492.3         | 4              | 618           | conserved hypothetical protein                                         |                 | C2H2 type zinc finger transcription factor          | prot_ID_765         | AN3492        |    |
| AN3493.3         | 3              | 1307          | conserved hypothetical protein                                         |                 | Threonine-type endopeptidase                        | prot_ID_157         | AN3493        |    |
| AN3494.3         | 2              | 233           | conserved hypothetical protein                                         |                 | Protein of unknown function                         | prot_ID_898         | AN3494        |    |
| AN3495.3         | 1              | 834           | NRPS-like enzyme                                                       | inpA            | Nonribosomal peptide synthetase                     | prot_ID_285         | AN3495        |    |
| <b>AN3496.3</b>  | 0              | 0             | nonribosomal peptide synthase, putative conserved hypothetical protein | inpB            | Nonribosomal peptide synthetase                     | <b>prot_ID_1032</b> | <b>AN3496</b> | EP |
| AN3497.3         | -1             | 27            | conserved hypothetical protein                                         | CYP623B2        | Cytochrome P450                                     | prot_ID_414         | AN3497        |    |
| AN3498.3         | -2             | 1672          | conserved hypothetical protein                                         |                 | Substrate-specific transmembrane transporter        | prot_ID_1159        | AN3498        |    |
| AN3499.3         | -3             | 432           | conserved hypothetical protein                                         |                 | Phosphotransferase                                  | prot_ID_547         | AN3499        |    |
| AN3500.3         | -4             | 280           | conserved hypothetical protein                                         |                 | RNA-directed DNA polymerase                         | prot_ID_1046        | AN3500        |    |
| AN3501.3         | -5             | 281           | conserved hypothetical protein                                         |                 | Zn(II)2Cys6 transcription factor                    | prot_ID_427         | AN3501        |    |
| AN3502.3         | -6             | 149           | conserved hypothetical protein                                         |                 | Zn(II)2Cys6 transcription factor                    | prot_ID_1173        | AN3502        |    |
| AN3503.3         | -7             | 349           | conserved hypothetical protein                                         |                 | Transmembrane transporter                           | prot_ID_558         | AN3503        |    |

|          |     |      |                                |                                  |     |        |
|----------|-----|------|--------------------------------|----------------------------------|-----|--------|
| AN3504.3 | -8  | 786  | conserved hypothetical protein | Alpha-1,4-glucosidase            | n/a | AN3504 |
| AN3505.3 | -9  | 306  | conserved hypothetical protein | D-alanine-D-alanine ligase       | n/a | AN3505 |
| AN3506.3 | -10 | 3177 | conserved hypothetical protein | Zn(II)2Cys6 transcription factor | n/a | AN3506 |

## ivo cluster

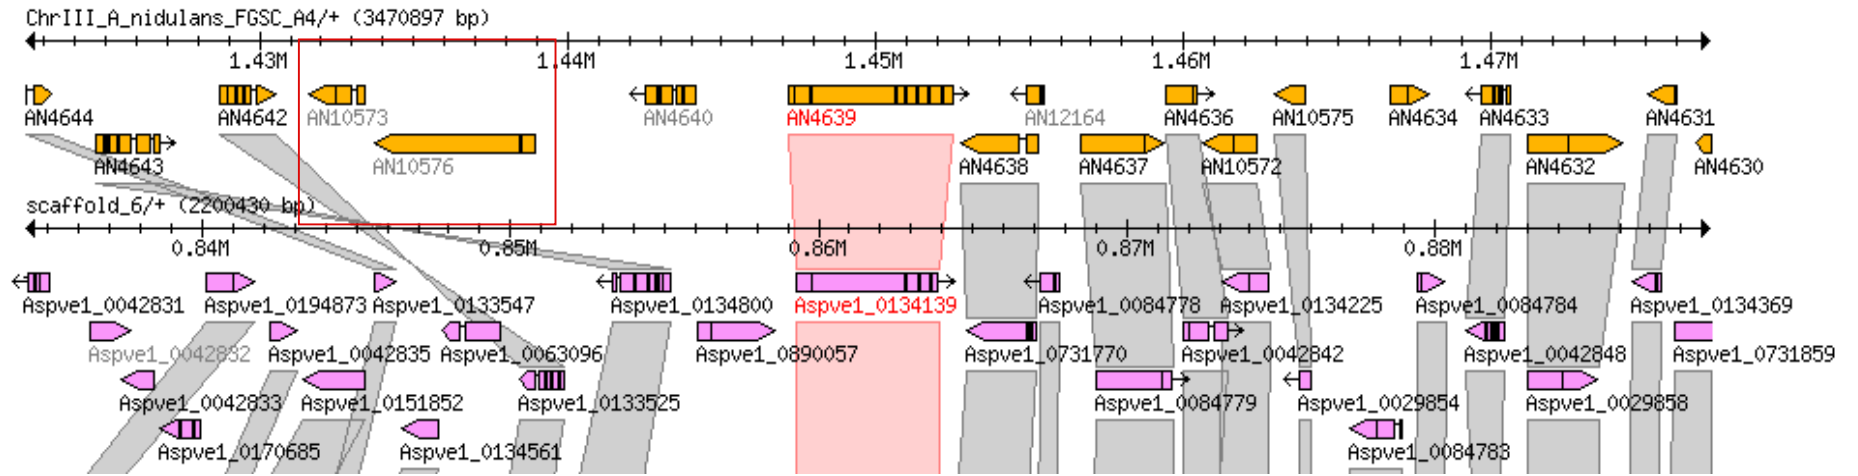

**ivo cluster**

| Gene id (SMURF)* | Gene positions | Gene distance (SMURF) | Annotated_gene_function        | AspGD gene name | AspGD manual annotation and notes                 | antiSMASH ID       | Gene ID           |
|------------------|----------------|-----------------------|--------------------------------|-----------------|---------------------------------------------------|--------------------|-------------------|
| n/a              |                |                       |                                |                 | PA and RING finger domain protein                 | prot_ID_334        | AN4637            |
| n/a              |                |                       |                                |                 | Protein of unknown function                       | prot_ID_1259       | AN12164           |
| n/a              |                |                       |                                |                 | Protein of unknown function                       | prot_ID_974        | AN4638            |
| n/a              |                |                       |                                |                 | TORC1 growth control complex subunit              | prot_ID_449        | AN4639            |
| n/a              |                |                       |                                |                 | tRNA-Met(CAU)4                                    | n/a                | tM(CAU)4          |
| n/a              |                |                       |                                |                 | Transmembrane transporter                         | prot_ID_630        | AN4640            |
| <b>AN10576.3</b> | 0              | 0                     | nonribosomal peptide synthase  | <b>ivoA</b>     | <b>One module NRPS; conidiophore pigmentation</b> | <b>prot_ID_570</b> | <b>AN10576</b> EP |
| AN10573.3        | -1             | 376                   | conserved hypothetical protein | <b>ivoC</b>     | <b>Cytochrome P450</b>                            | prot_ID_982        | AN10573 EP        |
| AN4642.3         | -2             | 1170                  | hypothetical protein           |                 | Protein of unknown function                       | prot_ID_739        | AN4642            |
| AN4643.3         | -3             | 2097                  | conserved hypothetical protein | CYP675A1        | Cytochrome P450                                   | prot_ID_221        | AN4643            |
| AN4644.3         | -4             | 1432                  | conserved hypothetical protein | CYP675A1        | Cytochrome P450                                   | prot_ID_853        | AN4644            |
| AN4645.3         | -5             | 1993                  | conserved hypothetical protein |                 | Protein of unknown function                       | prot_ID_333        | AN4645            |
| AN4646.3         | -6             | 1                     | hypothetical protein           |                 | Protein of unknown function                       | prot_ID_973        | AN4646            |
| AN4647.3         | -7             | 407                   | conserved hypothetical protein |                 | Protein of unknown function                       | prot_ID_448        | AN4647            |
| AN4648.3         | -8             | 59                    | conserved hypothetical protein |                 | small nucleolar ribonucleoprotein complex subunit | prot_ID_1086       | AN4648            |
| AN4649.3         | -9             | 806                   | conserved hypothetical protein |                 | Protein of unknown function                       | prot_ID_561        | AN4649            |

# Microperforanone cluster

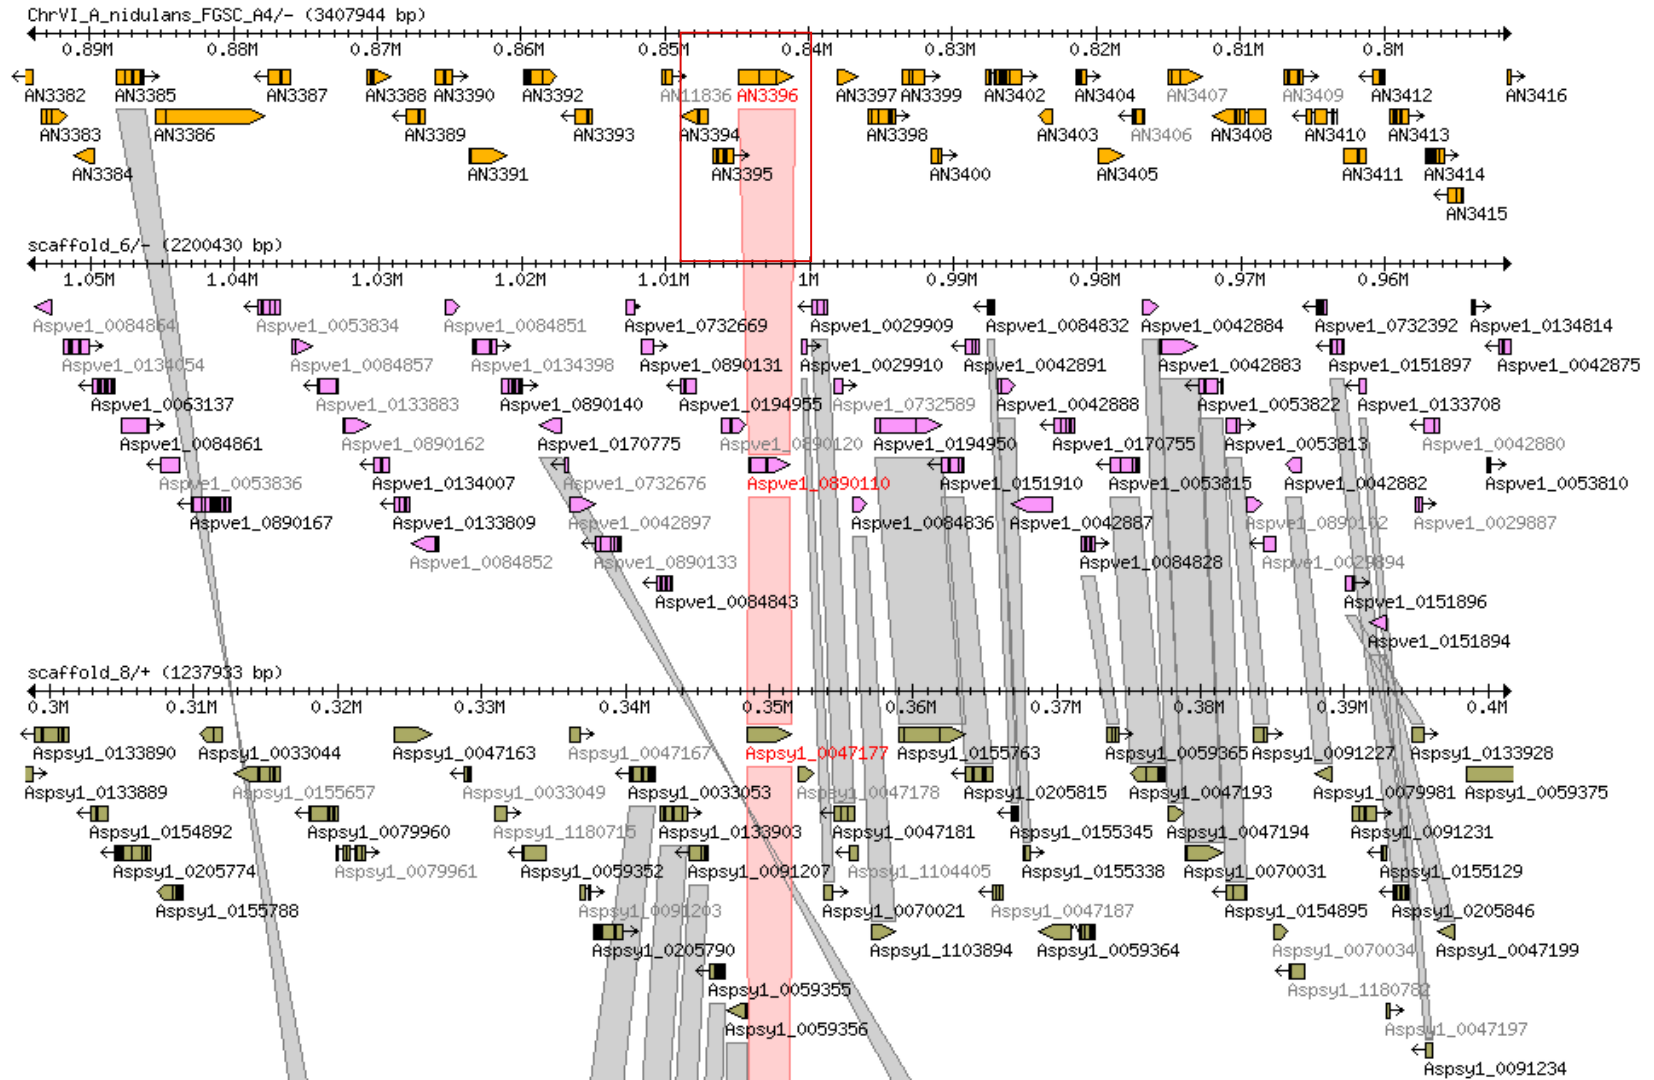

### Microperfurane cluster

| Gene id (SMURF)* | Gene positions | Gene distance | Annotated_gene_function (SMURF)               | AspGD gene name | AspGD manual annotation and notes                                                                       | antiSMASH ID       | Gene ID       |    |
|------------------|----------------|---------------|-----------------------------------------------|-----------------|---------------------------------------------------------------------------------------------------------|--------------------|---------------|----|
| AN3391.3         | 6              | 1039          | conserved hypothetical protein                |                 | C2H2 and Zn(2)-Cys(6) DNA binding transcription factor                                                  | prot_ID_954        | AN3391        |    |
| AN3392.3         | 5              | 1186          | conserved hypothetical protein                |                 | Monoxygenase                                                                                            | prot_ID_455        | AN3392        |    |
| AN3393.3         | 4              | 3751          | hypothetical protein                          | pepI            | Neutral metalloprotease II                                                                              | prot_ID_1062       | AN3393        |    |
| AN11393.3        | 3              | 2130          | predicted protein                             |                 | Protein of unknown function<br><b>Cytochrome P450; putative O-methylsterigmatocystin oxidoreductase</b> | prot_ID_1120       | AN11836       |    |
| AN3394.3         | 2              | 434           | conserved hypothetical protein                | <b>CYP620D1</b> | <b>oxidoreductase</b>                                                                                   | prot_ID_553        | AN3394        | EP |
| AN3395.3         | 1              | 1001          | conserved hypothetical protein                |                 | <b>Protein of unknown function</b>                                                                      | prot_ID_67         | AN3395        |    |
| <b>AN3396.3</b>  | 0              | 0             | NRPS-like enzyme                              | <b>micA</b>     | <b>Non-ribosomal peptide synthase</b>                                                                   | <b>prot_ID_663</b> | <b>AN3396</b> | EP |
| AN11394.3        | -1             | 250           | predicted protein                             |                 | Protein of unknown function                                                                             |                    |               |    |
| AN3397.3         | -2             | 2778          | conserved hypothetical protein                |                 | Protein of unknown function                                                                             | prot_ID_174        | AN3397        |    |
| AN3398.3         | -3             | 698           | hypothetical protein                          |                 | Transmembrane transporter<br>UDP-N-acetylmuramate dehydrogenase                                         | prot_ID_768        | AN3398        |    |
| AN3399.3         | -4             | 520           | conserved hypothetical protein                |                 | Tetrahydroxynaphthalene reductase                                                                       | prot_ID_275        | AN3399        |    |
| AN3400.3         | -5             | 334           | conserved hypothetical protein                |                 | Deleted ORF; DDE1 transposon-related ORF                                                                | prot_ID_668        | AN3400        |    |
| AN3401.3         | -6             | 665           | conserved hypothetical protein                |                 |                                                                                                         |                    | x             |    |
| AN3402.3         | -7             | 1647          | hypothetical protein similar to alpha-amylase |                 | Alpha-amylase                                                                                           | prot_ID_774        | AN3402        |    |
| AN3403.3         | -8             | 1076          | conserved hypothetical protein                |                 | Protein of unknown function                                                                             | prot_ID_280        | AN3403        |    |
| AN3404.3         | -9             | 1667          | conserved hypothetical protein                |                 | Glycosylphosphatidylinositol (GPI)-anchored protein                                                     | prot_ID_885        | AN3404        |    |
| AN3405.3         | -10            | 773           | conserved hypothetical protein                |                 | Protein of unknown function                                                                             | n/a                | AN3405        |    |
| AN3406.3         | -11            | 703           | hypothetical protein                          |                 | Protein of unknown function                                                                             | n/a                | AN3406        |    |
| AN3407.3         | -12            | 1627          | conserved hypothetical protein                |                 | Serine-type endopeptidase                                                                               | n/a                | AN3407        |    |
| AN3408.3         | -13            | 1234          | conserved hypothetical protein                |                 | Dipeptide transporter                                                                                   | n/a                | AN3408        |    |

## Monodictyphenone (mdp) cluster

Experimentally determined cluster

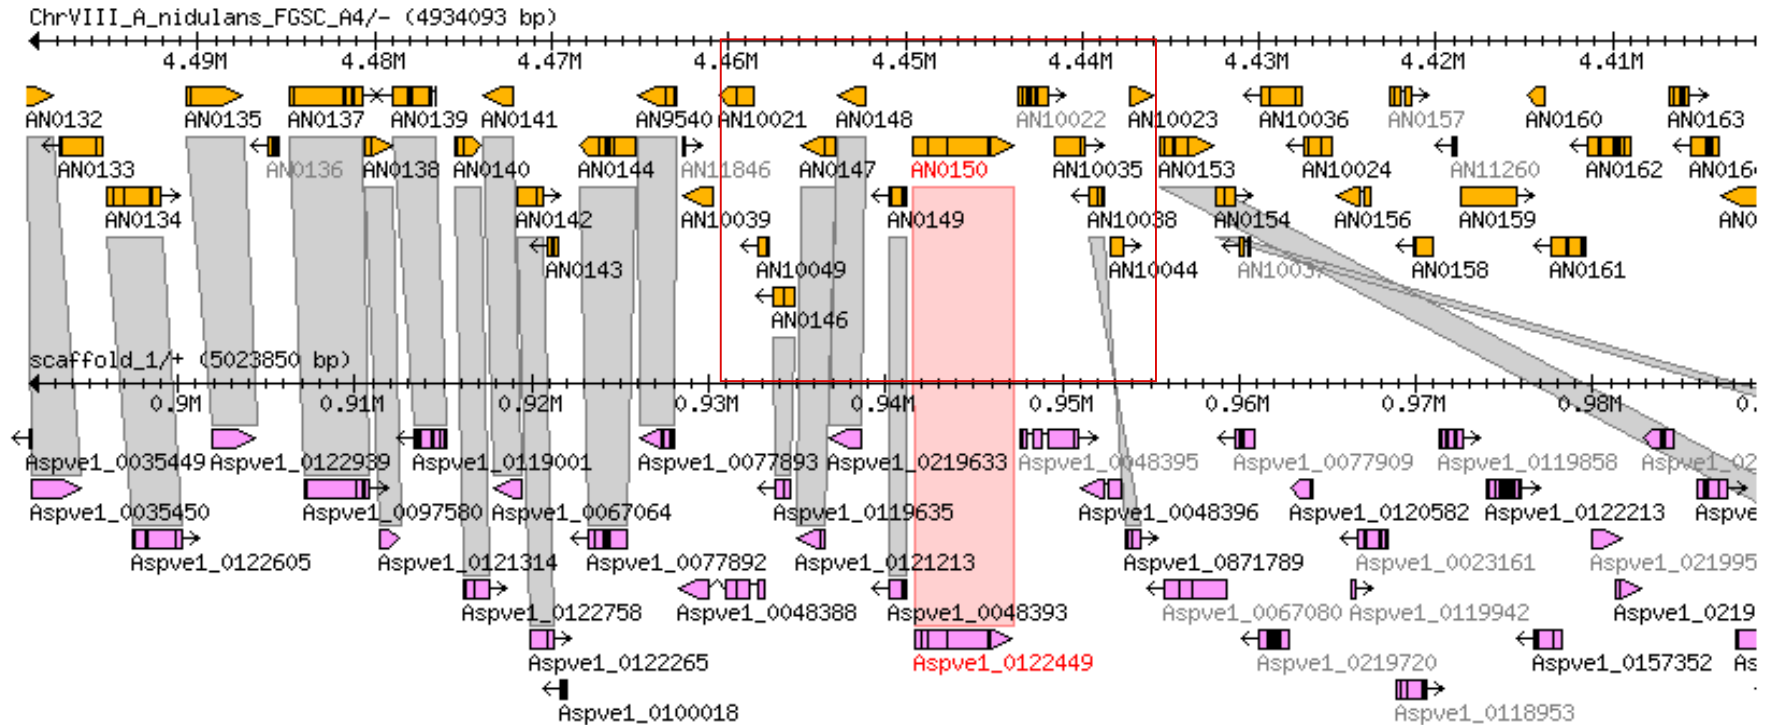



### Monodictyphenone (mdp) cluster

| Gene id (SMURF)* | Gene positions | Gene distance (SMURF) | Annotated_gene_function        | AspGD gene name | AspGD manual annotation and notes                               | antiSMASH ID        | Gene ID       |    |
|------------------|----------------|-----------------------|--------------------------------|-----------------|-----------------------------------------------------------------|---------------------|---------------|----|
| n/a              |                |                       |                                |                 | Protein of unknown function                                     | prot_ID_1731        | AN11846       |    |
| n/a              |                |                       |                                |                 | Protein of unknown function                                     | prot_ID_484         | AN9540        |    |
| n/a              |                |                       |                                |                 | Histidine acid phosphatase                                      | prot_ID_804         | AN10039       |    |
| n/a              |                |                       |                                | mdpA            | Transcription coactivator                                       | prot_ID_401         | AN10021       | ED |
| n/a              |                |                       |                                | mdpB            | Scytalone dehydratase                                           | prot_ID_886         | AN10049       |    |
| AN0146.3         | 4              | 631                   | conserved hypothetical protein | mdpC            | Versicolorin ketoreductase                                      | prot_ID_916         | AN0146        |    |
| AN0147.3         | 3              | 527                   | conserved hypothetical protein | mdpD            | Flavin-containing monooxygenase                                 | prot_ID_1395        | AN0147        |    |
| AN0148.3         | 2              | 1479                  | conserved hypothetical protein | mdpE            | C6 zinc finger transcription                                    | prot_ID_164         | AN0148        |    |
| AN0149.3         | 1              | 469                   | conserved hypothetical protein | mdpF            | zinc-dependent hydrolase                                        | prot_ID_619         | AN0149        |    |
| <b>AN0150.3</b>  | 0              | 0                     | polyketide synthase            | mdpG            | Polyketide synthase                                             | <b>prot_ID_1601</b> | <b>AN0150</b> |    |
| AN10022.3        | -1             | 306                   | conserved hypothetical protein | mdpH            | DUF 1772 superfamily protein                                    | prot_ID_856         | AN10022       |    |
| AN10035.3        | -2             | 368                   | conserved hypothetical protein | mdpI            | AMP-binding CoA ligase                                          | prot_ID_642         | AN10035       |    |
| AN10038.3        | -3             | 146                   | hypothetical protein           | mdpJ            | Glutathione S transferase                                       | prot_ID_351         | AN10038       |    |
| AN10044.3        | -4             | 365                   | conserved hypothetical protein | mdpK            | Oxidoreductase                                                  | prot_ID_271         | AN10044       |    |
| AN10023.3        | -5             | 361                   | conserved hypothetical protein | mdpL            | Protein of unknown function                                     | prot_ID_1333        | AN10023       | ED |
| AN0153.3         | -6             | 484                   | hypothetical protein           |                 | MYB DNA binding protein<br>TFIID and SAGA complex TAF10 subunit | prot_ID_1307        | AN0153        |    |
| AN0154.3         | -7             | 239                   | hypothetical protein           |                 | Protein of unknown function                                     | prot_ID_81          | AN0154        |    |
| AN10037.3        | -8             | 386                   | conserved hypothetical protein |                 | Transmembrane transporter                                       | prot_ID_1576        | AN10037       |    |
| AN10036.3        | -9             | 736                   | conserved hypothetical protein |                 | Monoxygenase                                                    | prot_ID_1112        | AN10036       |    |
| AN10024.3        | -10            | 557                   | conserved hypothetical protein |                 | Inositol tetrakisphosphate 3-kinase                             | prot_ID_105         | AN10024       |    |
| AN0156.3         | -11            | 242                   | conserved hypothetical protein |                 | Protein of unknown function                                     | prot_ID_1001        | AN0156        |    |
| AN0157.3         | -12            | 1490                  | conserved hypothetical protein |                 | Protein of unknown function                                     | n/a                 | AN0157        |    |
| AN0158.3         | -13            | 117                   | conserved hypothetical protein |                 | 2-alkenal reductase [NAD(P)]                                    | n/a                 | AN0158        |    |

## Penicillin cluster

Experimentally determined cluster

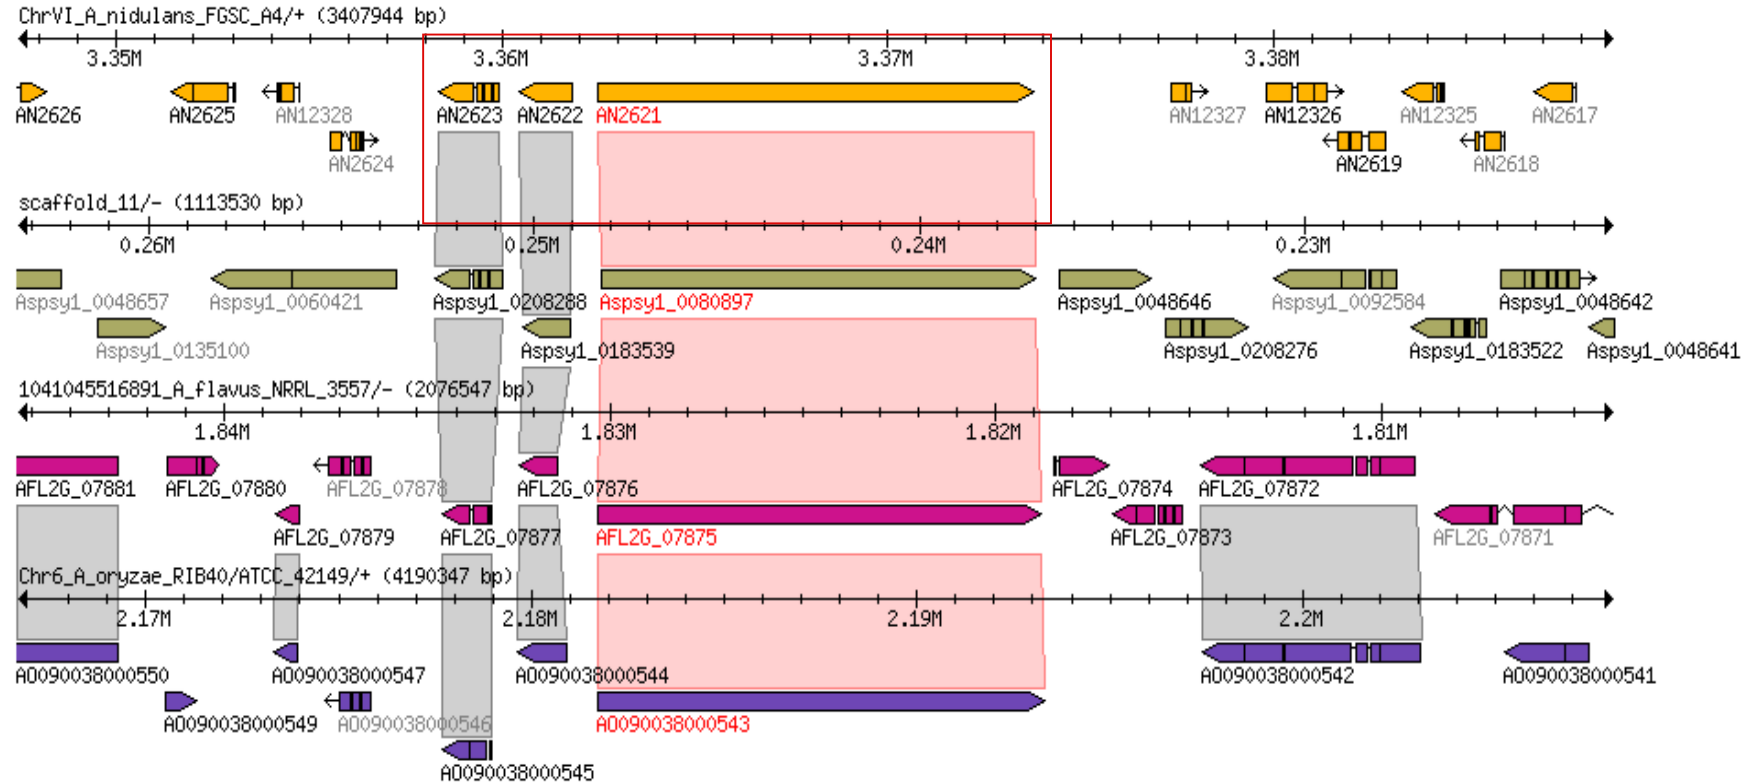

### Penicillin cluster

| Gene id (SMURF)* | Gene positions | Gene distance | Annotated_gene_function (SMURF)                                      | AspGD gene name | AspGD manual annotation and notes                                         | antiSMASH ID       | Gene ID       |    |
|------------------|----------------|---------------|----------------------------------------------------------------------|-----------------|---------------------------------------------------------------------------|--------------------|---------------|----|
| n/a              |                |               |                                                                      |                 | RNA-directed DNA polymerase                                               | prot_ID_101        | AN2616        |    |
| n/a              |                |               |                                                                      |                 | Protein of unknown function                                               | prot_ID_694        | AN2617        |    |
| n/a              |                |               |                                                                      |                 | Protein of unknown function                                               | prot_ID_207        | AN2618        |    |
| n/a              |                |               |                                                                      |                 | Protein of unknown function                                               | prot_ID_1131       | AN12325       |    |
| AN2619.3         | 2              | 243           | conserved hypothetical protein                                       |                 | Protein of unknown function                                               | prot_ID_803        | AN2619        |    |
| n/a              |                |               |                                                                      |                 | Domain(s) with predicted carbohydrate binding                             | prot_ID_1159       | AN12326       |    |
| n/a              |                |               |                                                                      |                 | Protein of unknown function                                               | prot_ID_1105       | AN12327       |    |
| <b>AN2621.3</b>  | 0              | 0             | N-(5-amino-5-carboxypentanoyl)-L-cysteinyl-D-valine synthase<br>AcvA | <b>acvA</b>     | <b>Delta-(L-alpha-aminoadipyl)-L-cysteinyl-D-valine synthetase</b>        | <b>prot_ID_480</b> | <b>AN2621</b> | ED |
| AN2622.3         | -1             | 873           | isopenicillin N synthetase                                           | <b>aatA</b>     | <b>Isopenicillin-N N-acyltransferase</b>                                  | prot_ID_1092       | AN2622        |    |
| AN2623.3         | -2             | 614           | acyl-coenzyme A:6-aminopenicillanic-acid-acyltransferase precursor   |                 | <b>Acyl-coenzyme A:6-aminopenicillanic-acid-acyltransferase precursor</b> | prot_ID_581        | AN2623        | ED |
| AN2624.3         | -3             | 2161          | conserved hypothetical protein                                       |                 | Protein of unknown function                                               | prot_ID_99         | AN2624        |    |
| AN11354.3        | -4             | 772           | hypothetical protein                                                 |                 | AN11354 was deleted in current assembly, see AN12328                      |                    |               |    |
| n/a              |                |               |                                                                      |                 | Protein of unknown function                                               | prot_ID_1144       | AN12328       |    |
| AN2625.3         | -5             | 1274          | conserved hypothetical protein                                       |                 | Transmembrane transporter                                                 | prot_ID_692        | AN2625        |    |
| n/a              |                |               |                                                                      |                 | Protein of unknown function                                               | prot_ID_205        | AN2626        |    |
| n/a              |                |               |                                                                      |                 | Mariner transposon-related ORF                                            | prot_ID_384        | AN10329       |    |

# pkb cluster

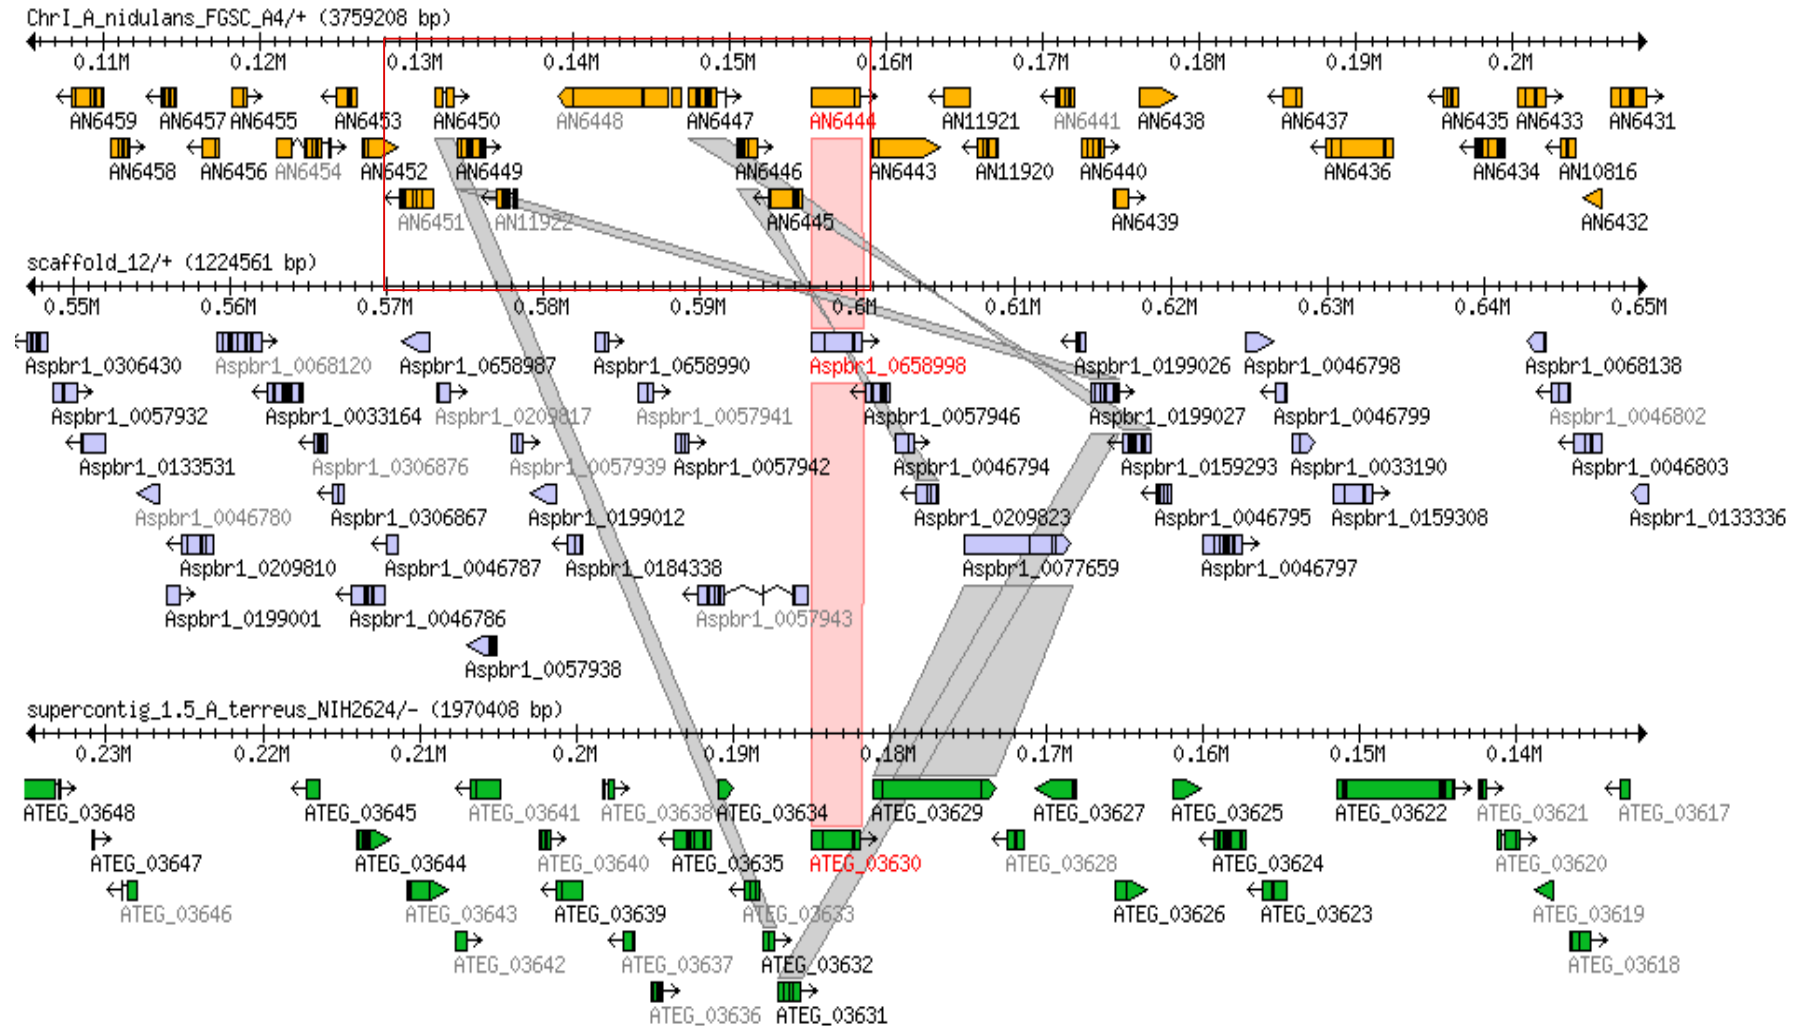

**pkb cluster**

| Gene id (SMURF)* | Gene positions | Gene distance | Annotated_gene_function (SMURF) | AspGD gene name | AspGD manual annotation and notes                                 | antiSMASH ID | Gene ID |    |
|------------------|----------------|---------------|---------------------------------|-----------------|-------------------------------------------------------------------|--------------|---------|----|
| AN6436.3         | 15             | 1688          | hypothetical protein            |                 | Transmembrane transporter                                         | n/a          |         |    |
| AN6437.3         | 14             | 2435          | conserved hypothetical protein  |                 | Protein of unknown function                                       | n/a          |         |    |
| AN11508.3        | 13             | 3575          | predicted protein               |                 | Deleted by the Broad                                              | n/a          |         |    |
| AN6438.3         | 12             | 558           | conserved hypothetical protein  |                 | Dipeptidyl-peptidase                                              | prot_ID_6    | AN6438  |    |
| AN6439.3         | 11             | 1202          | conserved hypothetical protein  |                 | Protein of unknown function                                       | prot_ID_692  | AN6439  |    |
| AN6440.3         | 10             | 583           | conserved hypothetical protein  |                 | Protein of unknown function                                       | prot_ID_891  | AN6440  |    |
| AN6441.3         | 9              | 2059          | conserved hypothetical protein  |                 | Protein of unknown function                                       | prot_ID_323  | AN6441  |    |
| n/a              |                |               |                                 |                 | Oxidoreductase                                                    | prot_ID_1298 | AN11920 |    |
| n/a              |                |               |                                 |                 | Protein of unknown function                                       | prot_ID_1257 | AN11921 |    |
| AN10817.3        | 8              | 957           | predicted protein               |                 | Deleted ORF                                                       | n/a          |         |    |
| AN6442.3         | 7              | 85            | conserved hypothetical protein  |                 | Deleted by the Broad                                              | n/a          |         |    |
| AN6443.3         | 6              | 753           | conserved hypothetical protein  |                 | Oxidoreductase                                                    | prot_ID_447  | AN6443  |    |
| AN6444.3         | 5              | 636           | NRPS-like enzyme                |                 | NRPS-like enzyme                                                  | prot_ID_1133 | AN6444  | EP |
| AN6445.3         | 4              | 828           | conserved hypothetical protein  |                 | Aryl-alcohol oxidase-related protein                              | prot_ID_572  | AN6445  |    |
| AN6446.3         | 3              | 325           | conserved hypothetical protein  |                 | Myb-like transcription factor                                     | prot_ID_5    | AN6446  |    |
| AN11509.3        | 2              | 357           | predicted protein               |                 | Deleted by the Broad                                              | n/a          |         |    |
| AN6447.3         | 1              | 565           | conserved hypothetical protein  |                 | O-methyltransferase                                               | prot_ID_690  | AN6447  |    |
| n/a              |                |               |                                 |                 | Protein of unknown function                                       | prot_ID_1310 | AN11922 |    |
| n/a              |                |               |                                 | pkbA            | Putative polyketide synthase;<br>involved in cichorine production | n/a          | AN6448  |    |
| n/a              |                |               |                                 | CYP5077A1       | cytochrome P450                                                   | n/a          | AN6449  |    |
| n/a              |                |               |                                 |                 | tetrahydroxynaphthalene reductase                                 | n/a          | AN6450  |    |
| n/a              |                |               |                                 |                 | transmembrane transporter                                         | n/a          | AN6451  | EP |

## pkdA cluster

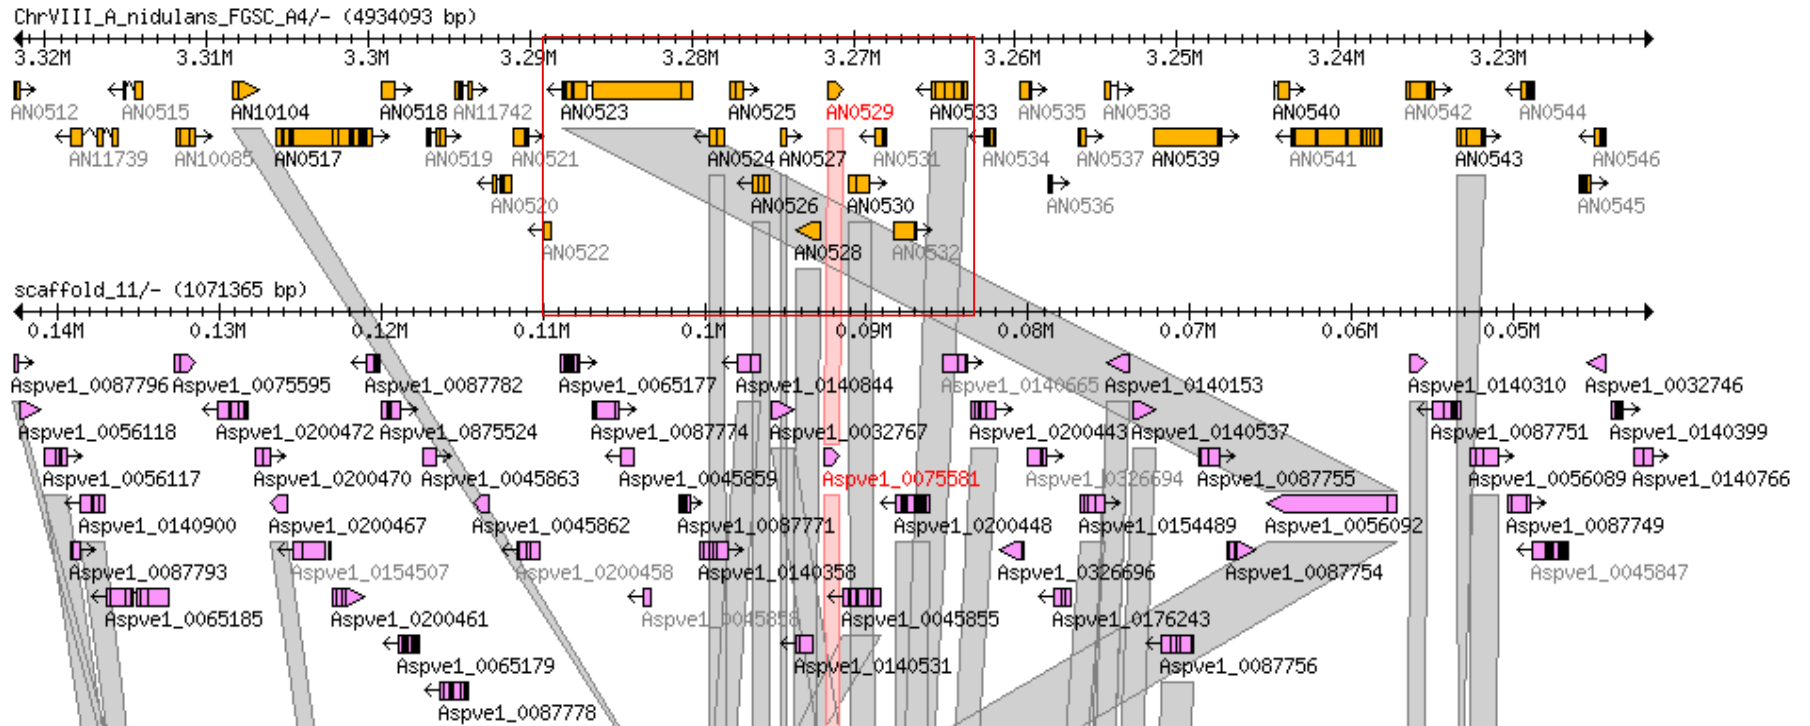

**pkdA cluster**

| Gene id (SMURF)* | Gene positions | Gene distance (SMURF) | Annotated_gene_function        | AspGD gene name | AspGD manual annotation and notes                                    | antiSMASH ID        | Gene ID       |     |
|------------------|----------------|-----------------------|--------------------------------|-----------------|----------------------------------------------------------------------|---------------------|---------------|-----|
| n/a              |                |                       |                                |                 | Protein of unknown function                                          | prot_ID_911         | AN10104       |     |
| n/a              |                |                       |                                |                 | Chitinase                                                            | prot_ID_1677        | AN0517        |     |
| n/a              |                |                       |                                |                 | Protein of unknown function                                          | prot_ID_454         | AN0518        |     |
| n/a              |                |                       |                                |                 | Protein of unknown function                                          | prot_ID_910         | AN0519        |     |
| n/a              |                |                       |                                |                 | Protein of unknown function<br>UDP-N-acetylmuramate<br>dehydrogenase | prot_ID_1720        | AN11742       |     |
| AN0520.3         | 3              | 301                   | conserved hypothetical protein |                 |                                                                      | prot_ID_218         | AN0520        |     |
| AN0521.3         | 2              | 917                   | conserved hypothetical protein |                 | Oxidoreductase                                                       | prot_ID_671         | AN0521        |     |
| AN0522.3         | 1              | 720                   | hypothetical protein           |                 | Protein of unknown function                                          | prot_ID_1135        | AN0522        |     |
| <b>AN0523.3</b>  | 0              | 0                     | polyketide synthase            | <b>pkdA</b>     | <b>Polyketide synthase</b>                                           | <b>prot_ID_1596</b> | <b>AN0523</b> | ECS |
| AN0524.3         | -1             | 1032                  | conserved hypothetical protein |                 | Protein of unknown function                                          | prot_ID_372         | AN0524        |     |
| AN0525.3         | -2             | 271                   | conserved hypothetical protein |                 | Oxidoreductase                                                       | prot_ID_827         | AN0525        |     |
| AN0526.3         | -3             | 497                   | conserved hypothetical protein |                 | Oxidoreductase                                                       | prot_ID_1302        | AN0526        |     |
| AN0527.3         | -4             | 661                   | conserved hypothetical protein |                 | histidine acid phosphatase                                           | prot_ID_76          | AN0527        |     |
| AN0528.3         | -5             | 786                   | conserved hypothetical protein |                 | Transmembrane transporter                                            | prot_ID_530         | AN0528        |     |
| AN0529.3         | -6             | 485                   | conserved hypothetical protein |                 | Protein of unknown function                                          | prot_ID_995         | AN0529        |     |
| AN0530.3         | -7             | 524                   | conserved hypothetical protein |                 | Monoxygenase                                                         | prot_ID_295         | AN0530        |     |
| AN0531.3         | -8             | 353                   | conserved hypothetical protein |                 | Protein of unknown function                                          | prot_ID_747         | AN0531        |     |
| AN0532.3         | -9             | 563                   | conserved hypothetical protein |                 | DDE1 transposon-related ORF                                          | prot_ID_1218        | AN0532        |     |
| AN0533.3         | -10            | 1006                  | conserved hypothetical protein |                 | Zn(II)2Cys6 transcription factor                                     | prot_ID_1675        | AN0533        | ECS |
| n/a              |                |                       |                                |                 | GTPase                                                               | prot_ID_452         | AN0534        |     |

# pkf cluster

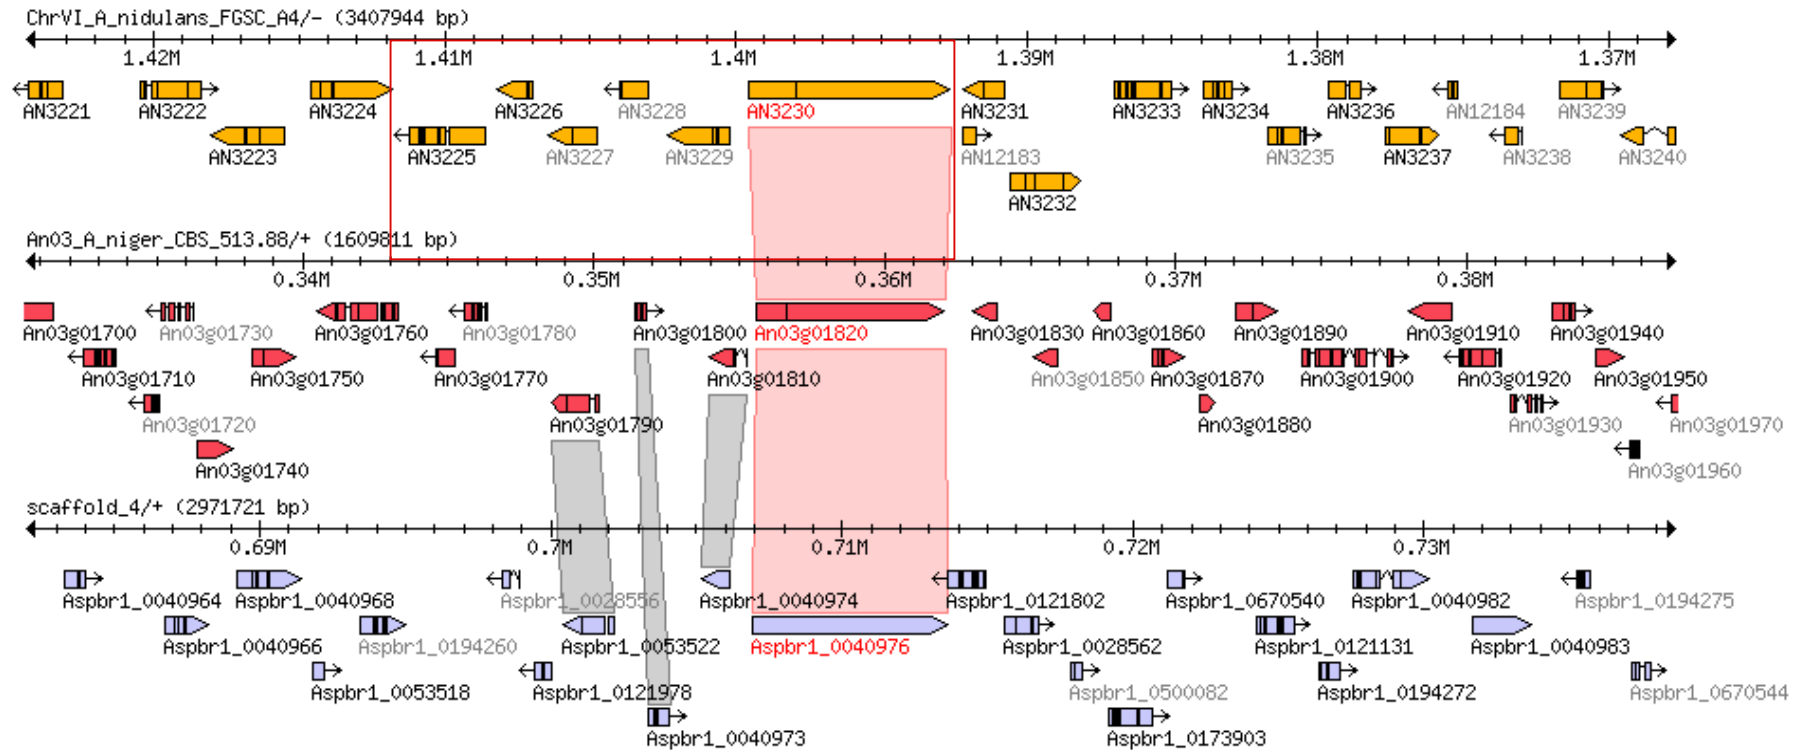



**pkf cluster**

| Gene id (SMURF)* | Gene positions | Gene distance | Annotated_gene_function (SMURF) | AspGD gene name | AspGD manual annotation and notes                                              | antiSMASH ID       | Gene ID       |         |
|------------------|----------------|---------------|---------------------------------|-----------------|--------------------------------------------------------------------------------|--------------------|---------------|---------|
| n/a              |                |               |                                 |                 |                                                                                | n/a                |               |         |
| n/a              |                |               |                                 |                 |                                                                                | n/a                |               |         |
| AN3217.3         | 13             | 2312          | conserved hypothetical protein  |                 | Zn(II)2Cys6 transcription factor                                               | n/a                | AN3217        |         |
| AN3218.3         | 12             | 300           | conserved hypothetical protein  |                 | Protein of unknown function                                                    | n/a                | AN3218        |         |
| AN3219.3         | 11             | 648           | hypothetical protein            |                 | Protein of unknown function                                                    | n/a                | AN3219        |         |
| AN3220.3         | 10             | 795           | conserved hypothetical protein  |                 | Predicted substrate-specific transmembrane transporter                         | n/a                | AN3220        |         |
| AN3221.3         | 9              | 2732          | conserved hypothetical protein  |                 | Transmembrane transporter                                                      | n/a                | AN3221        |         |
| AN3222.3         | 8              | 614           | conserved hypothetical protein  |                 | IMP 5'-nucleotidase                                                            | prot_ID_646        | AN3222        |         |
| AN3223.3         | 7              | 661           | 6-phosphofructokinase           | pkfA            | 6-phosphofructokinase                                                          | prot_ID_157        | AN3223        |         |
| AN3224.3         | 6              | 1400          | conserved hypothetical protein  |                 | RNA polymerase II mediator complex component SRB4                              | prot_ID_748        | AN3224        |         |
| AN3225.3         | 5              | 677           | conserved hypothetical protein  |                 | Cytochrome P450                                                                | prot_ID_253        | AN3225        | EP      |
| AN3226.3         | 4              | 567           | conserved hypothetical protein  |                 | HAS domain protein                                                             | prot_ID_855        | AN3226        |         |
| AN3227.3         | 3              | 951           | conserved hypothetical protein  |                 | Monooxygenase                                                                  | prot_ID_362        | AN3227        |         |
| AN3228.3         | 2              | 741           | conserved hypothetical protein  |                 | Prenyltransferase                                                              | prot_ID_968        | AN3228        |         |
| AN3229.3         | 1              | 922           | conserved hypothetical protein  |                 | Aryl-alcohol oxidase                                                           | prot_ID_466        | AN3229        |         |
| <b>AN3230.3</b>  | 0              | 0             | polyketide synthase             | pkfA            | Polyketide synthase                                                            | <b>prot_ID_643</b> | <b>AN3230</b> | ECS, EP |
| n/a              |                |               |                                 |                 | Protein of unknown function                                                    | prot_ID_1124       | AN12183       |         |
| AN3231.3         | -1             | 380           | hypothetical protein            |                 | Domain(s) with predicted metal ion transmembrane transporter activity          | prot_ID_156        | AN3231        |         |
| AN3232.3         | -2             | 334           | conserved hypothetical protein  |                 | Pantothenate transmembrane transporter                                         | prot_ID_747        | AN3232        |         |
| AN11379.3        | -3             | 292           | predicted protein               |                 | Deleted ORF                                                                    | n/a                |               |         |
| AN3233.3         | -4             | 1290          | conserved hypothetical protein  |                 | Domain(s) with predicted substrate-specific transmembrane transporter activity | prot_ID_252        | AN3233        |         |
| AN3234.3         | -5             | 1060          | conserved hypothetical protein  |                 | Oxidoreductase                                                                 | prot_ID_853        | AN3234        |         |
| AN3235.3         | -6             | 1280          | conserved hypothetical protein  |                 | Monooxygenase                                                                  | prot_ID_360        | AN3235        |         |
| AN3236.3         | -7             | 792           | conserved hypothetical protein  |                 | O-methyltransferase                                                            | prot_ID_965        | AN3236        |         |
| AN3237.3         | -8             | 866           | conserved hypothetical protein  |                 | Protein of unknown function                                                    | prot_ID_464        | AN3237        |         |

n/a  
n/a

Protein of unknown function  
Protein of unknown function

prot\_ID\_1137 AN12184  
prot\_ID\_1073 AN3238

# pkg cluster

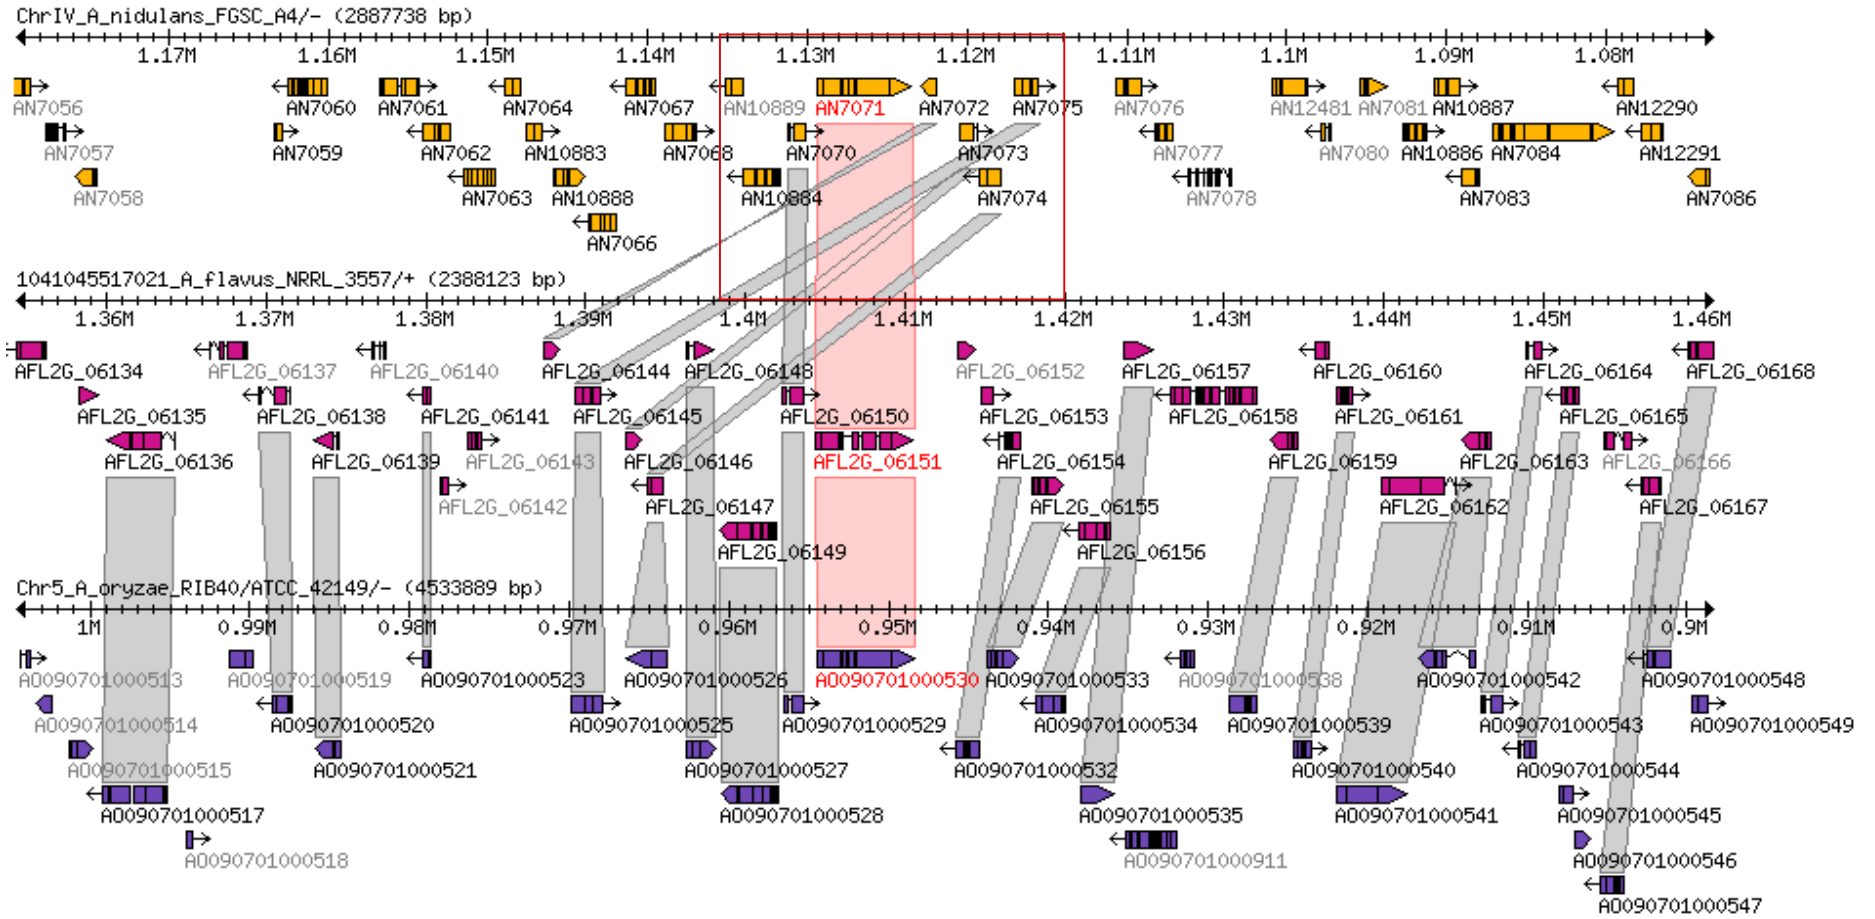

**pkg cluster**

| Gene id (SMURF)* | Gene positions | Gene distance (SMURF) | Annotated_gene_function (SMURF) | AspGD gene name | AspGD manual annotation and notes                                              | antiSMASH ID       | Gene ID       |         |
|------------------|----------------|-----------------------|---------------------------------|-----------------|--------------------------------------------------------------------------------|--------------------|---------------|---------|
| n/a              |                |                       |                                 |                 | Protein of unknown function                                                    | n/a                | AN7059        |         |
| n/a              |                |                       |                                 |                 | Monophenol monooxygenase                                                       | n/a                | AN7060        |         |
| AN7061.3         | 12             | 83                    | hypothetical protein            |                 | Zn(II)2Cys6 transcription factor                                               | n/a                | AN7061        |         |
| AN7062.3         | 11             | 852                   | conserved hypothetical protein  |                 | Protein of unknown function                                                    | n/a                | AN7062        |         |
| AN7063.3         | 10             | 532                   | conserved hypothetical protein  |                 | N,N-dimethylaniline monooxygenase                                              | n/a                | AN7063        |         |
| AN7064.3         | 9              | 357                   | conserved hypothetical protein  |                 | Fumarylacetoacetate hydrolase family protein                                   | prot_ID_650        | AN7064        |         |
| AN10883.3        | 8              | 662                   | hypothetical protein            |                 | Protein of unknown function                                                    | prot_ID_391        | AN10883       |         |
| AN10888.3        | 7              | 243                   | hypothetical protein            |                 | Monooxygenase                                                                  | prot_ID_150        | AN10888       |         |
| AN7066.3         | 6              | 557                   | conserved hypothetical protein  | <b>CYP670A1</b> | Cytochrome P450                                                                | prot_ID_741        | AN7066        |         |
| AN7067.3         | 5              | 650                   | conserved hypothetical protein  |                 | Domain(s) with predicted substrate-specific transmembrane transporter activity | prot_ID_322        | AN7067        |         |
| AN7068.3         | 4              | 1785                  | conserved hypothetical protein  |                 | Vanillyl alcohol oxidase                                                       | prot_ID_839        | AN7068        |         |
| AN10889.3        | 3              | 36                    | conserved hypothetical protein  |                 | <b>O-methyltransferase</b>                                                     | prot_ID_656        | AN10889       | EP      |
| AN10884.3        | 2              | 459                   | conserved hypothetical protein  |                 | <b>Oxidoreductase</b>                                                          | prot_ID_904        | AN10884       |         |
| AN7070.3         | 1              | 596                   | conserved hypothetical protein  | <b>pkgB</b>     | <b>Beta-lactamase-type thioesterase</b>                                        | prot_ID_563        | AN7070        |         |
| <b>AN7071.3</b>  | 0              | 0                     | polyketide synthase             | <b>pkgA</b>     | <b>Polyketide synthase</b>                                                     | <b>prot_ID_144</b> | <b>AN7071</b> |         |
| AN7072.3         | -1             | 455                   | conserved hypothetical protein  |                 | <b>Zn(II)2Cys6 transcription factor</b>                                        | prot_ID_649        | AN7072        |         |
| AN7073.3         | -2             | 1428                  | conserved hypothetical protein  |                 | <b>Zn(II)2Cys6 transcription factor</b>                                        | prot_ID_231        | AN7073        |         |
| AN7074.3         | -3             | 368                   | conserved hypothetical protein  |                 | <b>Oxidoreductase</b><br><b>UDP-N-acetylmuramate dehydrogenase</b>             | prot_ID_740        | AN7074        |         |
| AN7075.3         | -4             | 927                   | conserved hypothetical protein  |                 | <b>Oxidoreductase</b><br><b>UDP-N-acetylmuramate dehydrogenase</b>             | prot_ID_321        | AN7075        | ECS, EP |
| n/a              |                |                       |                                 |                 | Protein of unknown function                                                    | prot_ID_837        | AN7076        |         |
| n/a              |                |                       |                                 | acnA            | Actinin-like protein                                                           | prot_ID_412        | AN7077        |         |
| n/a              |                |                       |                                 |                 | Protein of unknown function                                                    | prot_ID_930        | AN7078        |         |

## pkh cluster

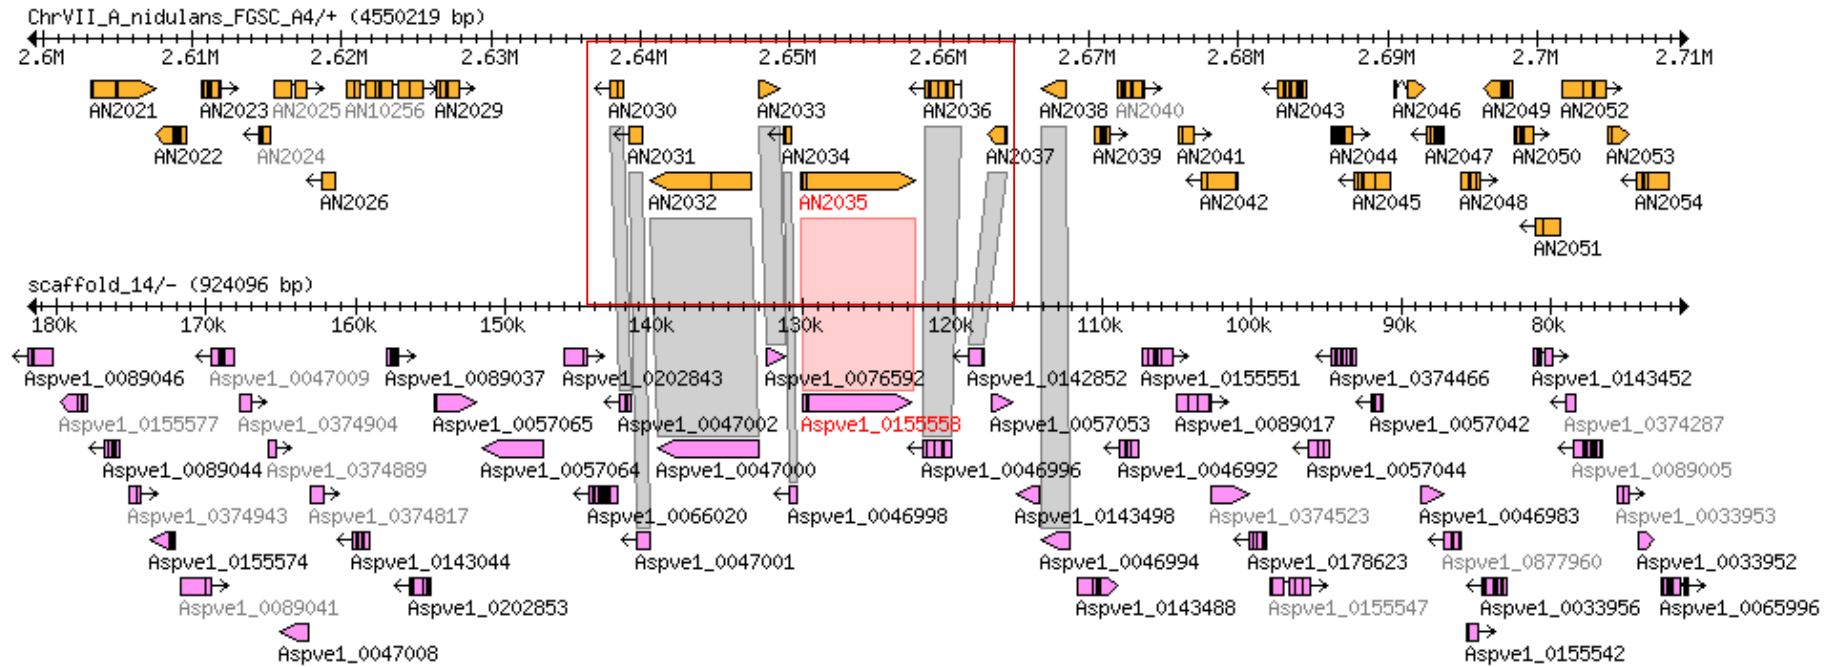

**pkh cluster**

| Gene id (SMURF)* | Gene positions | Gene distance (SMURF) | Annotated_gene_function (SMURF)              | AspGD gene name | AspGD manual annotation and notes               | antiSMASH ID        | Gene ID       |          |
|------------------|----------------|-----------------------|----------------------------------------------|-----------------|-------------------------------------------------|---------------------|---------------|----------|
| n/a              |                |                       |                                              |                 | F-box protein                                   | prot_ID_1288        | AN2029        |          |
| n/a              |                |                       |                                              |                 | Oxidoreductase                                  | prot_ID_44          | AN2030        | ECS, IGD |
| n/a              |                |                       |                                              |                 | Protein of unknown function                     | prot_ID_858         | AN2031        |          |
| AN2032.3         | 3              | 582                   | polyketide synthase                          | <b>pkhA</b>     | Polyketide synthase                             | prot_ID_184         | AN2032        |          |
| AN2033.3         | 2              | 383                   | conserved hypothetical protein               |                 | Monooxygenase                                   | prot_ID_1003        | AN2033        |          |
| AN2034.3         | 1              | 542                   | conserved hypothetical protein               |                 | Protein of unknown function                     | prot_ID_328         | AN2034        |          |
| <b>AN2035.3</b>  | 0              | 0                     | polyketide synthase                          | <b>pkhB</b>     | polyketide synthase                             | <b>prot_ID_1143</b> | <b>AN2035</b> |          |
| AN2036.3         | -1             | 692                   | conserved hypothetical protein               |                 | Zn(II)2Cys6 transcription factor                | prot_ID_475         | AN2036        |          |
| AN11323.3        | -2             | 768                   | predicted protein                            |                 | AN11323.3 was deleted from the current assembly | prot_ID_1226        | AN10256       |          |
| AN2037.3         | -3             | 1187                  | hypothetical protein similar to CipA protein |                 | Oxidoreductase                                  | prot_ID_1286        | AN2037        |          |
| AN2038.3         | -4             | 2542                  | conserved hypothetical protein               |                 | Oxidoreductase                                  | prot_ID_616         | AN2038        | EP       |
| AN2039.3         | -5             | 2085                  | conserved hypothetical protein               |                 | Oxidoreductase                                  | prot_ID_1430        | AN2039        |          |
| AN2040.3         | -6             | 518                   | conserved hypothetical protein               | CYP552A21       | Cytochrome P450                                 | prot_ID_181         | AN2040        |          |
| AN2041.3         | -7             | 2200                  | conserved hypothetical protein               |                 | Protein of unknown function                     | prot_ID_1001        | AN2041        |          |
| AN2042.3         | -8             | 446                   | conserved hypothetical protein               |                 | FAD binding domain protein                      | prot_ID_327         | AN2042        |          |
| AN2043.3         | -9             | 2733                  | conserved hypothetical protein               |                 | Amino acid transmembrane transporter            | n/a                 | AN2043        |          |

# pki cluster

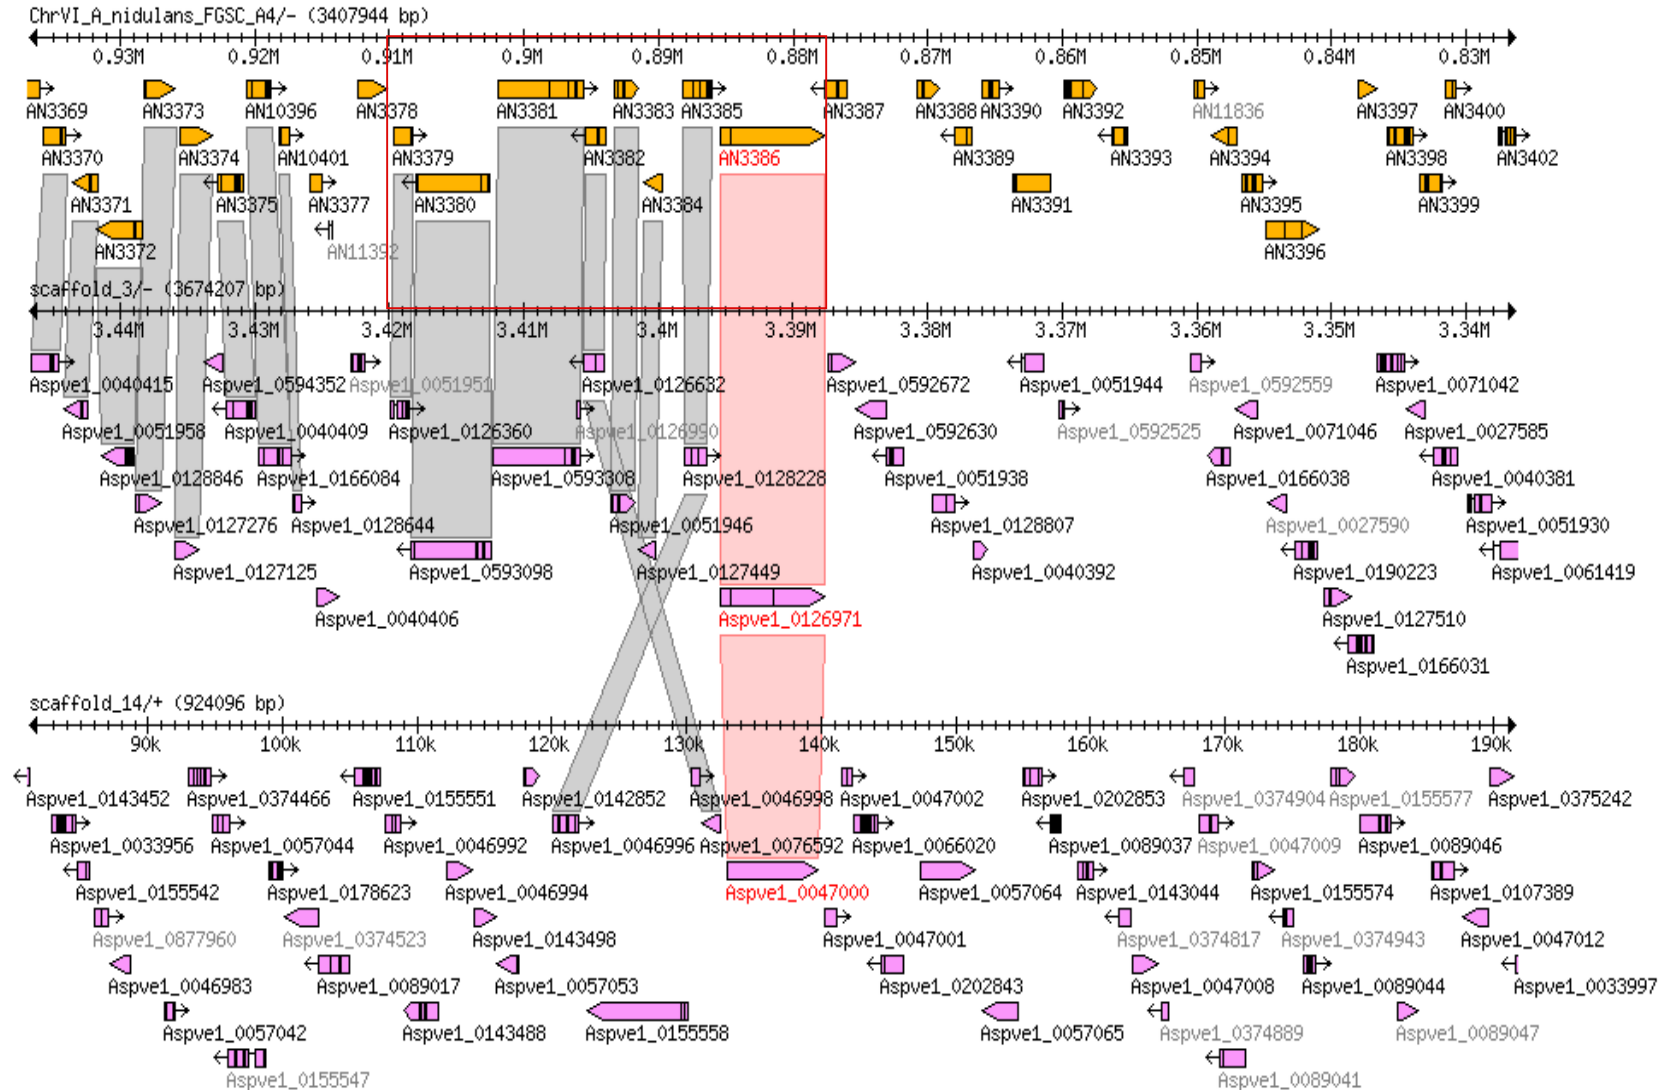

**pki cluster**

| Gene id (SMURF)* | Gene positions | Gene distance (SMURF) | Annotated_gene_function        | AspGD gene name | AspGD manual annotation and notes                      | antiSMASH ID       | Gene ID       |     |
|------------------|----------------|-----------------------|--------------------------------|-----------------|--------------------------------------------------------|--------------------|---------------|-----|
| n/a              |                |                       |                                |                 | <b>Protein of unknown function</b>                     | n/a                | AN3379        | ECS |
| AN3380.3         | 6              | 633                   | fatty acid synthase FasA       | pkiB            | <b>fatty-acyl-CoA synthase</b>                         | prot_ID_242        | AN3380        |     |
| AN3381.3         | 5              | 514                   | conserved hypothetical protein | pkiC            | <b>Fatty acid synthetase subunit</b>                   | prot_ID_843        | AN3381        |     |
| AN3382.3         | 4              | 599                   | hypothetical protein           | salA            | <b>Salicylate 1-monooxygenase</b>                      | prot_ID_351        | AN3382        |     |
| AN3383.3         | 3              | 337                   | conserved hypothetical protein |                 | <b>Transmembrane transporter</b>                       | prot_ID_955        | AN3383        |     |
| AN3384.3         | 2              | 1745                  | conserved hypothetical protein |                 | <b>Trichothecene 3-O-acetyltransferase</b>             | prot_ID_456        | AN3384        |     |
| AN3385.3         | 1              | 1000                  | conserved hypothetical protein |                 | <b>Zn(II)2Cys6 transcription factor</b>                | prot_ID_1063       | AN3385        |     |
| <b>AN3386.3</b>  | 0              | 0                     | polyketide synthase            | pkiA            | <b>Polyketide synthase</b>                             | <b>prot_ID_554</b> | <b>AN3386</b> | ECS |
| n/a              |                |                       |                                | gprD            | G-protein coupled receptor                             | prot_ID_68         | AN3387        |     |
| n/a              |                |                       |                                | amyF            | Apha-amylase                                           | prot_ID_664        | AN3388        |     |
| n/a              |                |                       |                                | xghA            | Xylogalacturonan hydrolase                             | prot_ID_175        | AN3389        |     |
| n/a              |                |                       |                                | pmeA            | Pectinesterase                                         | prot_ID_349        | AN3390        |     |
| n/a              |                |                       |                                |                 | C2H2 and Zn(2)-Cys(6) DNA binding transcription factor | prot_ID_954        | AN3391        |     |
| n/a              |                |                       |                                |                 | Monooxygenase                                          | prot_ID_455        | AN3392        |     |



## Sterigmatocystin (stc) cluster

Experimentally determined cluster

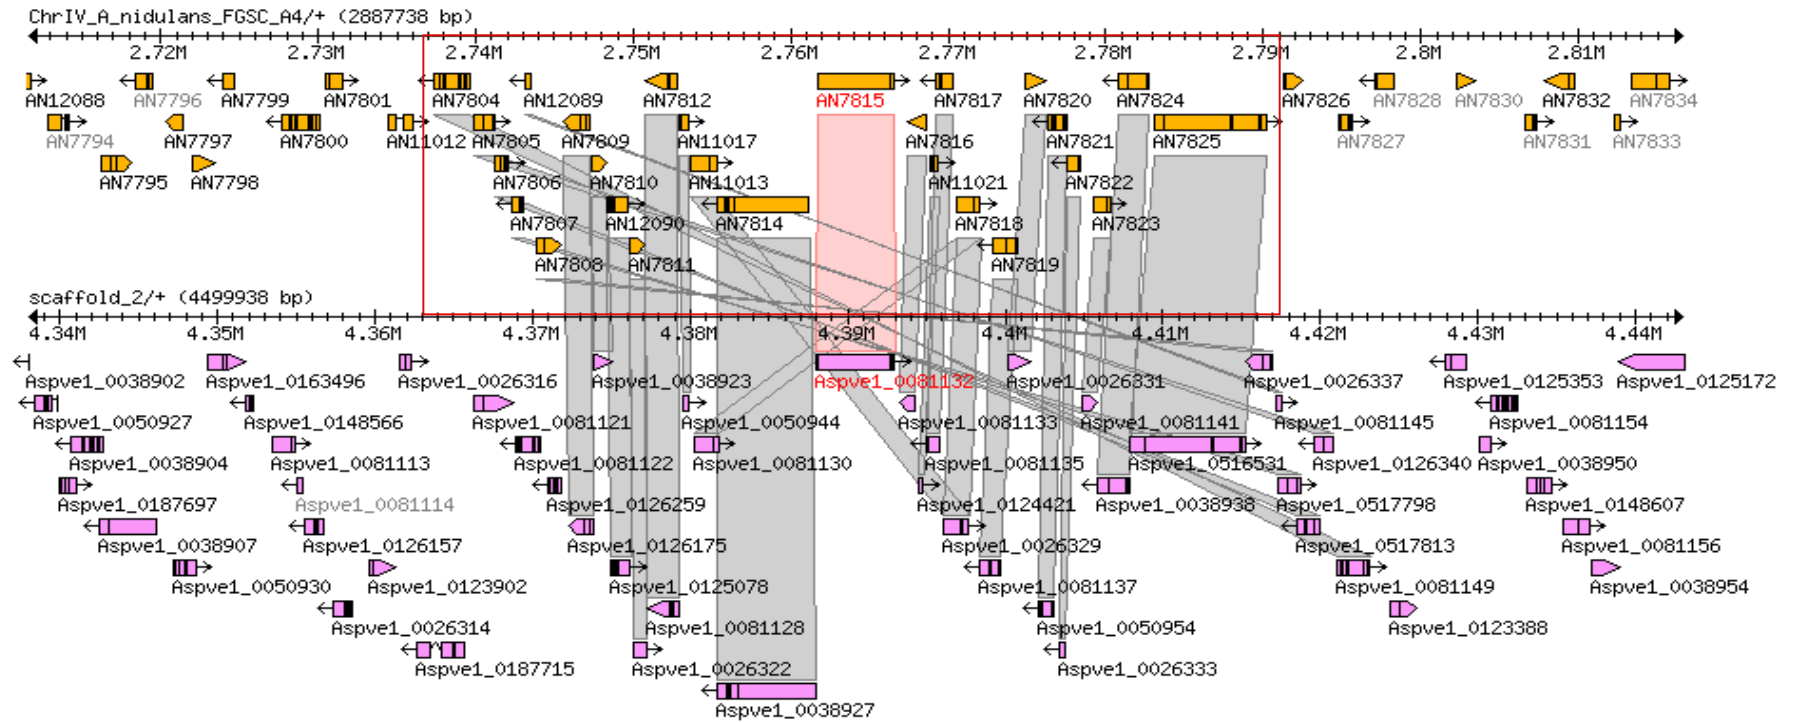

### Sterigmatocystin (stc) cluster

| Gene id (SMURF)* | Gene positions | Gene distance (SMURF) | Annotated_gene_function (SMURF)                                 | AspGD gene name | AspGD manual annotation and notes                             | antiSMASH ID      | Gene ID       |    |
|------------------|----------------|-----------------------|-----------------------------------------------------------------|-----------------|---------------------------------------------------------------|-------------------|---------------|----|
| n/a              |                |                       |                                                                 |                 | Protein of unknown function;                                  | n/a               | AN11012       |    |
| n/a              |                |                       |                                                                 | stcW            | FAD-containing monooxygenase                                  | n/a               | AN7804        | ED |
| n/a              |                |                       |                                                                 | stcV            | Norsolorinic acid reductase                                   | n/a               | AN7805        |    |
| AN7806.3         | 11             | 199                   | ketoreductase StcU/VerA                                         | stcU            | Versicolorin reductase                                        | n/a               | AN7806        |    |
| AN7807.3         | 10             | 644                   | sterigmatocystin biosynthesis protein StcT                      | stcT            | Translation elongation factor 1 gamma                         | n/a               | AN7807        |    |
| AN7808.3         | 9              | 150                   | sterigmatocystin biosynthesis P450 monooxygenase StcS           | stcS            | sterigmatocystin biosynthesis CYP59 family P450 monooxygenase | n/a               | AN7808        |    |
| AN11020.3        | 8              | 0                     | hypothetical protein                                            |                 | ORF not present in AspGD                                      | n/a               | AN11020       |    |
| AN7809.3         | 7              | 160                   | conserved hypothetical protein                                  |                 | Protein of unknown function                                   | n/a               | AN7809        |    |
| AN7810.3         | 6              | 1201                  | conserved hypothetical protein stcQ                             |                 | Protein of unknown function                                   | n/a               | AN7810        |    |
| AN7811.3         | 5              | 35                    | conserved hypothetical protein stcO                             |                 | Protein of unknown function                                   | n/a               | AN7811        |    |
| AN7812.3         | 4              | 188                   | conserved hypothetical protein stcN                             |                 | Versicolorin B synthase                                       | n/a               | AN7812        |    |
| AN11017.3        | 3              | 93                    | conserved hypothetical protein                                  |                 | Protein of unknown function                                   | n/a               | AN11017       |    |
| AN11013.3        | 2              | 5                     | hypothetical protein similar to VerB                            | stcK            | Polyketide synthase/fatty acid synthase beta                  | n/a               | AN11013       |    |
| AN7814.3         | 1              | 495                   | sterigmatocystin biosynthesis fatty acid synthase subunit beta  | stcL            | Polyketide synthase/fatty acid synthase alpha                 | n/a               | AN7814        |    |
| <b>AN7815.3</b>  | 0              | 0                     | sterigmatocystin biosynthesis fatty acid synthase alpha subunit |                 | Protein of unknown function                                   | <b>prot_ID_37</b> | <b>AN7815</b> |    |
| AN7816.3         | -1             | 936                   | conserved hypothetical protein stcI                             |                 | Lipase/esterase                                               | prot_ID_547       | AN7816        |    |
| AN11021.3        | -2             | 151                   | predicted protein                                               |                 | Protein of unknown function                                   | prot_ID_665       | AN11021       |    |
| AN7817.3         | -3             | 190                   | conserved hypothetical protein                                  |                 | Protein of unknown function                                   | prot_ID_125       | AN7817        |    |
| AN7818.3         | -4             | 176                   | conserved hypothetical protein stcF                             |                 | P450 monooxygenase                                            | prot_ID_634       | AN7818        |    |
| AN7819.3         | -5             | 930                   | conserved hypothetical protein                                  |                 | Protein of unknown function                                   | prot_ID_214       | AN7819        |    |
| AN7820.3         | -6             | 502                   | sterigmatocystin biosynthesis C6 transcription factor           | afIR            | Zn(II)2Cys6 transcription factor                              | prot_ID_361       | AN7820        |    |
| AN7821.3         | -7             | 192                   | conserved hypothetical protein stcE                             |                 | Norsolorinic acid reductase                                   | prot_ID_876       | AN7821        |    |
| AN7822.3         | -8             | 314                   | conserved hypothetical protein                                  |                 | Protein of unknown function                                   | prot_ID_456       | AN7822        |    |
| AN7823.3         | -9             | 1121                  | conserved hypothetical protein stcC                             |                 | peroxidase                                                    | prot_ID_36        | AN7823        |    |

|          |     |      |                                                       |      |                                          |             |        |    |
|----------|-----|------|-------------------------------------------------------|------|------------------------------------------|-------------|--------|----|
| AN7825.3 | -10 | 2887 | sterigmatocystin polyketide synthase                  | stcA | Polyketide synthase                      | prot_ID_123 | AN7825 |    |
| AN7824.3 | -11 | 134  | sterigmatocystin biosynthesis P450 monooxygenase StcB | stcB | P450 monooxygenase                       | prot_ID_545 | AN7824 | ED |
| n/a      |     |      |                                                       |      | Protein of unknown function              | prot_ID_632 | AN7826 |    |
| n/a      |     |      |                                                       |      | Protein of unknown function              | prot_ID_213 | AN7827 |    |
| n/a      |     |      |                                                       |      | Unsaturated rhamnogalacturonan hydrolase | prot_ID_722 | AN7828 |    |
| n/a      |     |      |                                                       |      | Protein of unknown function              | prot_ID_452 | AN7830 |    |
| n/a      |     |      |                                                       |      | Protein of unknown function              | prot_ID_35  | AN7831 |    |
| n/a      |     |      |                                                       |      | Oxidoreductase                           | prot_ID_544 | AN7832 |    |

## Terriquinone (tdi) cluster

Experimentally determined cluster

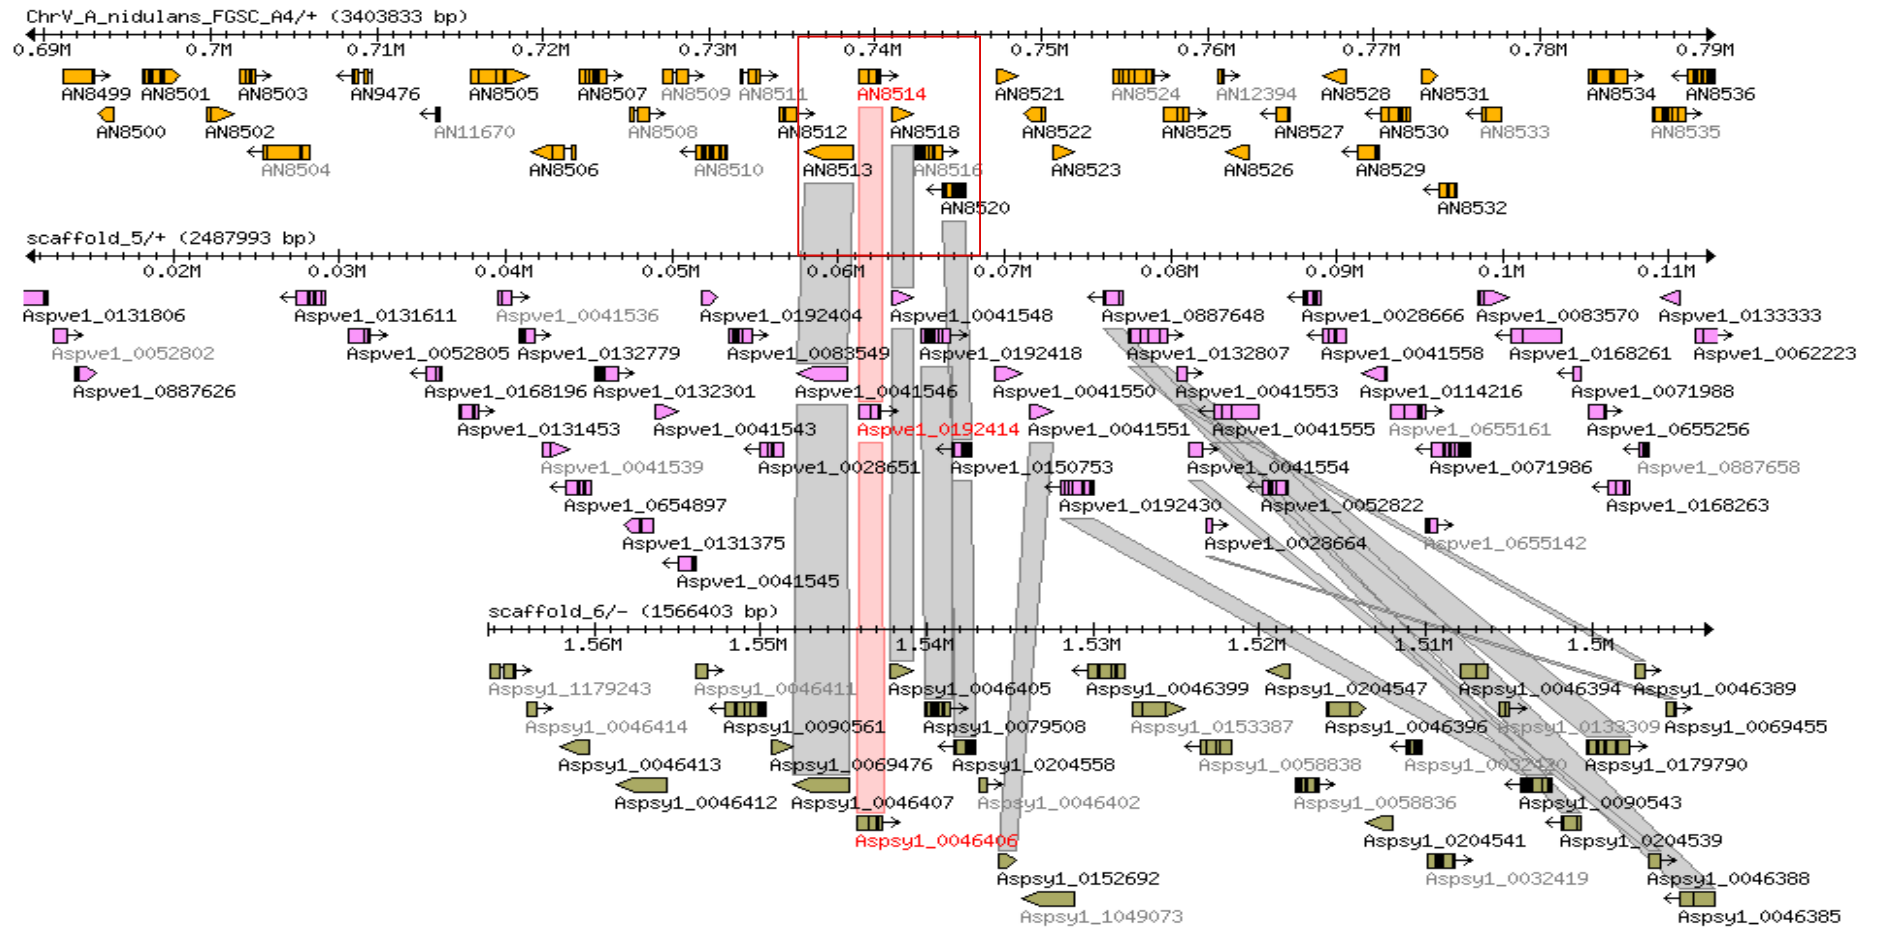

### Terriquinone (tdi) cluster

| Gene id (SMURF)* | Gene positions | Gene distance (SMURF) | Annotated_gene_function (SMURF)       | AspGD gene name | AspGD manual annotation and notes                                        | antiSMASH ID       | Gene ID       |    |
|------------------|----------------|-----------------------|---------------------------------------|-----------------|--------------------------------------------------------------------------|--------------------|---------------|----|
| AN8506.3         | 8              | 306                   | conserved hypothetical protein        |                 | Zn(II)2Cys6 transcription factor                                         | n/a                |               |    |
| AN8507.3         | 7              | 1377                  | conserved hypothetical protein        |                 | Transmembrane transporter                                                | n/a                |               |    |
| AN8508.3         | 6              | 808                   | conserved hypothetical protein        |                 | Protein of unknown function                                              | prot_ID_374        | AN8508        |    |
| AN8509.3         | 5              | 414                   | conserved hypothetical protein        |                 | Zn(II)2Cys6 transcription factor                                         | prot_ID_929        | AN8509        |    |
| AN8510.3         | 4              | 824                   | conserved hypothetical protein        | CYP686A1P       | Cytochrome P450; possibly a pseudogene                                   | prot_ID_66         | AN8510        |    |
| AN8511.3         | 3              | 1034                  | conserved hypothetical protein        |                 | Branched chain amino acid aminotransferase                               | prot_ID_640        | AN8511        |    |
| AN8512.3         | 2              | 287                   | conserved hypothetical protein        |                 | Protein of unknown function, adjacent to tdi (terrequinone) gene cluster | prot_ID_165        | AN8512        |    |
| AN8513.3         | 1              | 390                   | NRPS-like enzyme                      | tdiA            | Putative single-module nonribosomal peptide synthetase (NRPS)            | prot_ID_737        | AN8513        | ED |
| <b>AN8514.3</b>  | 0              | 0                     | DMATS type aromatic prenyltransferase | tdiB            | Asterriquinone prenyltransferase                                         | <b>prot_ID_270</b> | <b>AN8514</b> |    |
| AN8515.3         | -1             | 651                   | conserved hypothetical protein        |                 |                                                                          | n/a                |               |    |
| AN8516.3         | -2             | 217                   | conserved hypothetical protein        | tdiD            | Aminotransferase                                                         | prot_ID_372        | AN8516        |    |
| n/a              |                |                       |                                       | tdiE            | Protein of unknown function                                              | n/a                |               |    |
| n/a              |                |                       |                                       | tdiC            | NADPH-dependent quinone reductase                                        | prot_ID_473        | AN8518        |    |
| n/a              |                |                       |                                       | tdiE            | Protein of unknown function                                              | prot_ID_162        | AN8520        | ED |
| n/a              |                |                       |                                       |                 | Protein of unknown function, adjacent to tdi (terrequinone) gene cluster | prot_ID_735        | AN8521        |    |
| n/a              |                |                       |                                       |                 |                                                                          | prot_ID_268        | AN8522        |    |

## xptA-containing cluster

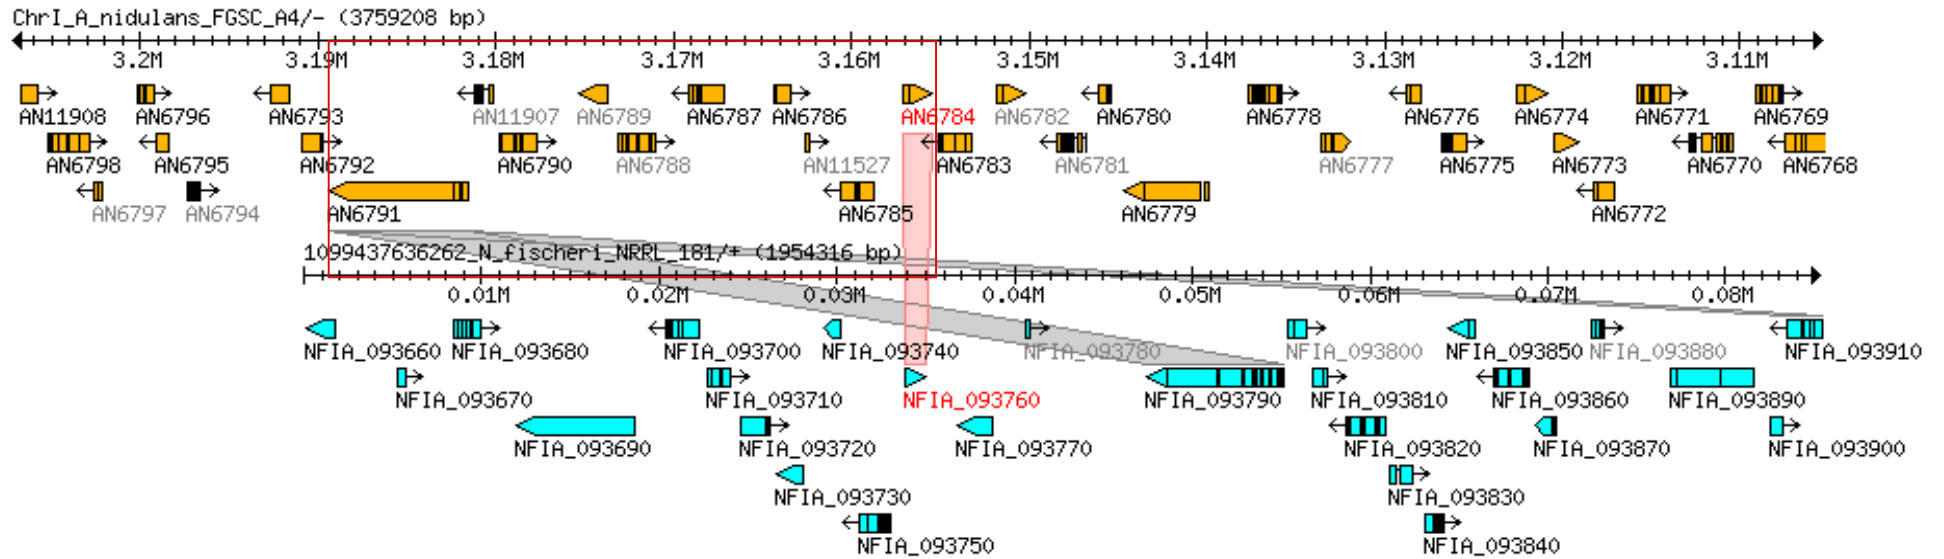

**xptA-containing cluster**

| Gene id (SMURF)* | Gene positions | Gene distance | Annotated_gene_function (SMURF)                                                | AspGD gene name | AspGD manual annotation and notes                                                   | antiSMASH ID       | Gene ID       |           |
|------------------|----------------|---------------|--------------------------------------------------------------------------------|-----------------|-------------------------------------------------------------------------------------|--------------------|---------------|-----------|
| AN6791.3         | -8             | 1801          | polyketide synthase, putative                                                  |                 | Polyketide synthase                                                                 | n/a                | AN6791        | FA,<br>EP |
| AN6790.3         | -7             | 2598          | hypothetical protein                                                           |                 | Zn(II)2Cys6 transcription factor                                                    | n/a                | AN6790        |           |
| AN6789.3         | -6             | 1015          | conserved hypothetical protein                                                 |                 | Protein of unknown function                                                         | n/a                | AN6789        |           |
| AN6788.3         | -5             | 1614          | conserved hypothetical protein                                                 |                 | Zn(II)2Cys6 transcription factor                                                    | n/a                | AN6788        |           |
| AN6787.3         | -4             | 2709          | conserved hypothetical protein                                                 | CYP682C1        | Cytochrome P450                                                                     | n/a                | AN6787        |           |
| AN6786.3         | -3             | 907           | hypothetical protein                                                           |                 | Beta-1,4-endoglucanase                                                              | prot_ID_1076       | AN6786        |           |
| AN11527.3        | -2             | 1870          | predicted protein                                                              |                 | Protein of unknown function                                                         | prot_ID_1002       | AN11527       |           |
| AN6785.3         | -1             | 1786          | conserved hypothetical protein DMATS type aromatic prenyltransferase, putative |                 | Protein of unknown function                                                         | prot_ID_391        | AN6785        |           |
| <b>AN6784.3</b>  | <b>0</b>       | <b>0</b>      |                                                                                | <b>xptA</b>     | <b>DMATS) type aromatic prenyltransferase</b>                                       | <b>prot_ID_954</b> | <b>AN6784</b> | FA,<br>EP |
| AN6783.3         | 1              | 511           | conserved hypothetical protein                                                 |                 | Nucleobase transmembrane transporter                                                | prot_ID_266        | AN6783        |           |
| AN6782.3         | 2              | 1455          | hypothetical protein                                                           |                 | Sodium:dicarboxylate symporter                                                      | prot_ID_839        | AN6782        |           |
| AN6781.3         | 3              | 1773          | hypothetical protein                                                           |                 | Protein of unknown function                                                         | prot_ID_152        | AN6781        |           |
| AN6780.3         | 4              | 1202          | conserved hypothetical protein                                                 |                 | Protein of unknown function ABC superfamily multidrug resistance-associated protein | prot_ID_720        | AN6780        |           |
| AN6779.3         | 5              | 865           | conserved hypothetical protein                                                 |                 | Transmembrane transporter                                                           | n/a                | AN6779        |           |
| AN6778.3         | 6              | 2235          | conserved hypothetical protein                                                 |                 | Transmembrane transporter                                                           | n/a                | AN6778        |           |
| AN6777.3         | 7              | 2270          | conserved hypothetical protein                                                 |                 | F-box protein                                                                       | n/a                | AN6777        |           |
| AN6776.3         | 8              | 2843          | conserved hypothetical protein                                                 |                 | Hydrolase                                                                           | n/a                | AN6776        |           |
| AN6775.3         | 9              | 1227          | conserved hypothetical protein                                                 | aatB            | penicillin biosynthesis protein                                                     | n/a                | AN6775        |           |
| AN6774.3         | 10             | 2879          | conserved hypothetical protein                                                 |                 | Transmembrane transporter                                                           | n/a                | AN6774        |           |
| AN6773.3         | 11             | 532           | conserved hypothetical protein                                                 |                 | Triglyceride lipase                                                                 | n/a                | AN6773        |           |
| AN6772.3         | 12             | 896           | conserved hypothetical protein                                                 |                 | Protein of unknown function                                                         | n/a                | AN6772        |           |
| AN6771.3         | 13             | 1250          | conserved hypothetical protein                                                 |                 | Protein of unknown function                                                         | n/a                | AN6771        |           |
| AN6770.3         | 14             | 1038          | conserved hypothetical protein                                                 |                 | Amino acid transmembrane transporter                                                | n/a                | AN6770        |           |

## xptB-containing cluster

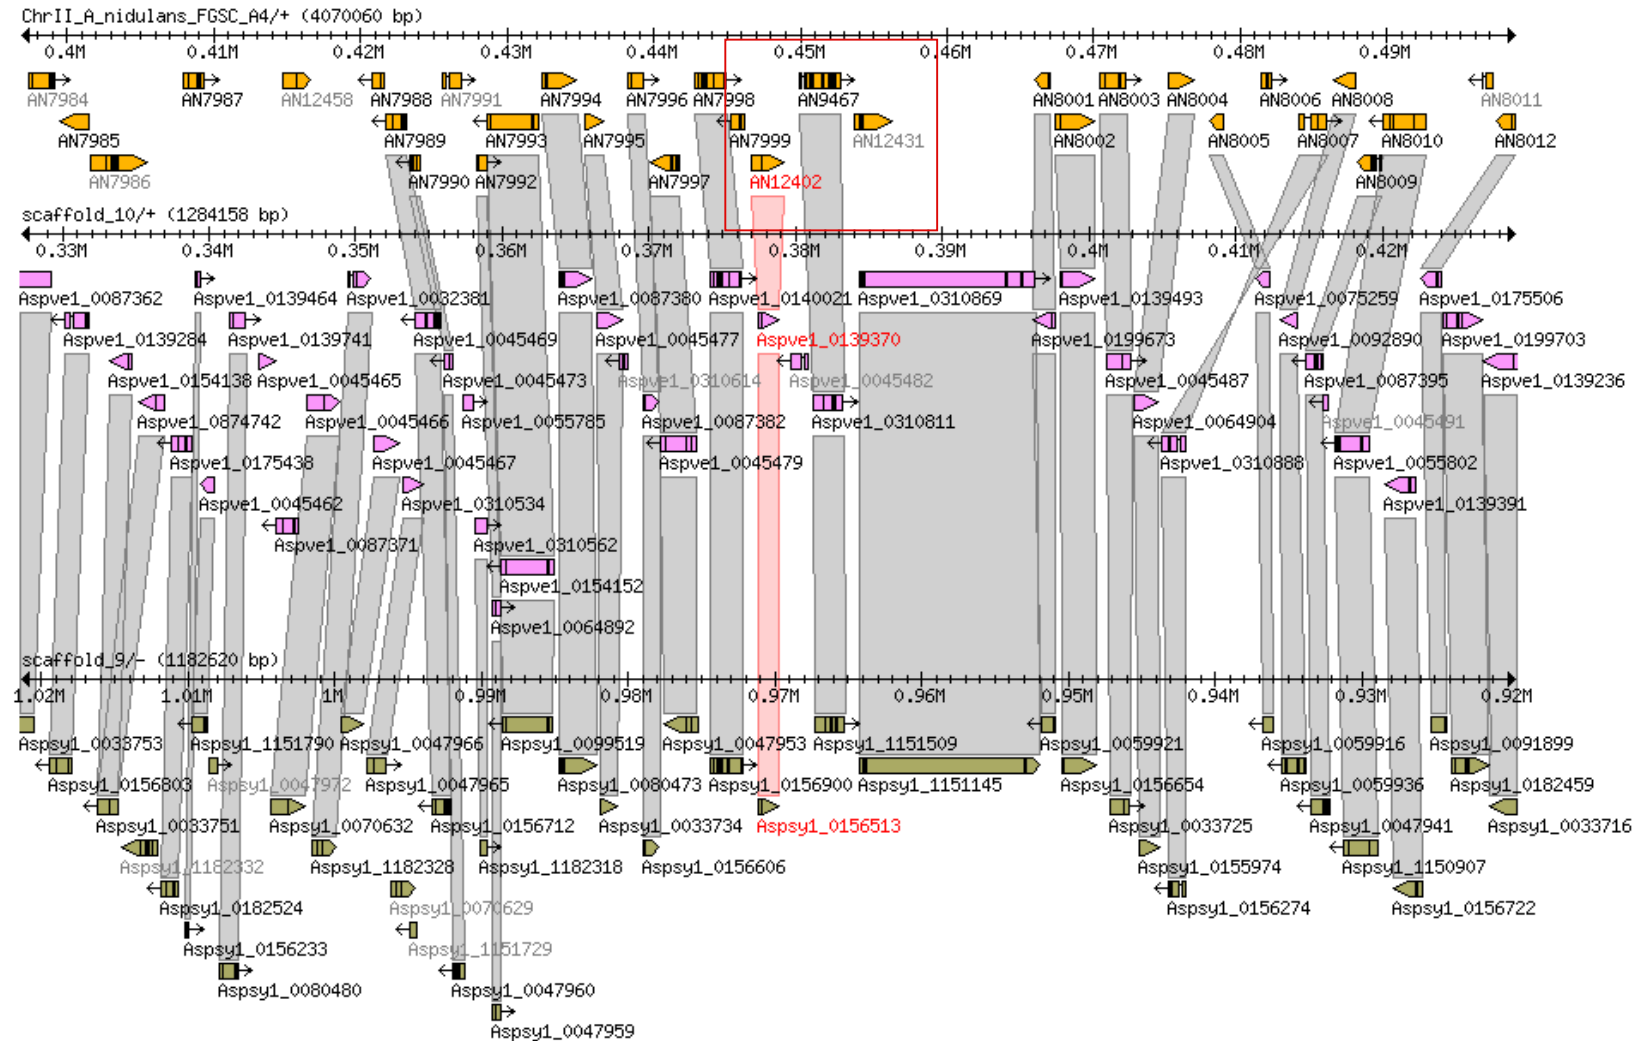



**xptB-containing cluster**

| Gene id<br>(SMURF)* | Gene<br>positions | Gene<br>distance (SMURF) | Annotated_gene_function | AspGD<br>gene name | AspGD manual annotation and notes                  | antiSMASH ID | Gene ID        |     |
|---------------------|-------------------|--------------------------|-------------------------|--------------------|----------------------------------------------------|--------------|----------------|-----|
| n/a                 |                   |                          |                         |                    | Protein of unknown function                        | prot_ID_678  | AN7996         |     |
| n/a                 |                   |                          |                         |                    | RNA polymerase III transcription<br>factor subunit | prot_ID_74   | AN7997         |     |
| n/a                 |                   |                          |                         |                    | GMC oxidoreductase                                 | prot_ID_804  | AN7998         |     |
| n/a                 |                   |                          |                         |                    | <b>Oxidoreductase</b>                              | prot_ID_202  | AN7999         | ECS |
| n/a                 |                   |                          |                         | <b>xptB</b>        | <b>Prenyltransferase</b>                           | prot_ID_1407 | <b>AN12402</b> |     |
| n/a                 |                   |                          |                         |                    | <b>Serine/threonine phosphatase</b>                | prot_ID_601  | AN9467         |     |
| n/a                 |                   |                          |                         |                    | <b>Protein of unknown function</b>                 | prot_ID_1451 | AN12431        | IGD |

## AN0016 cluster

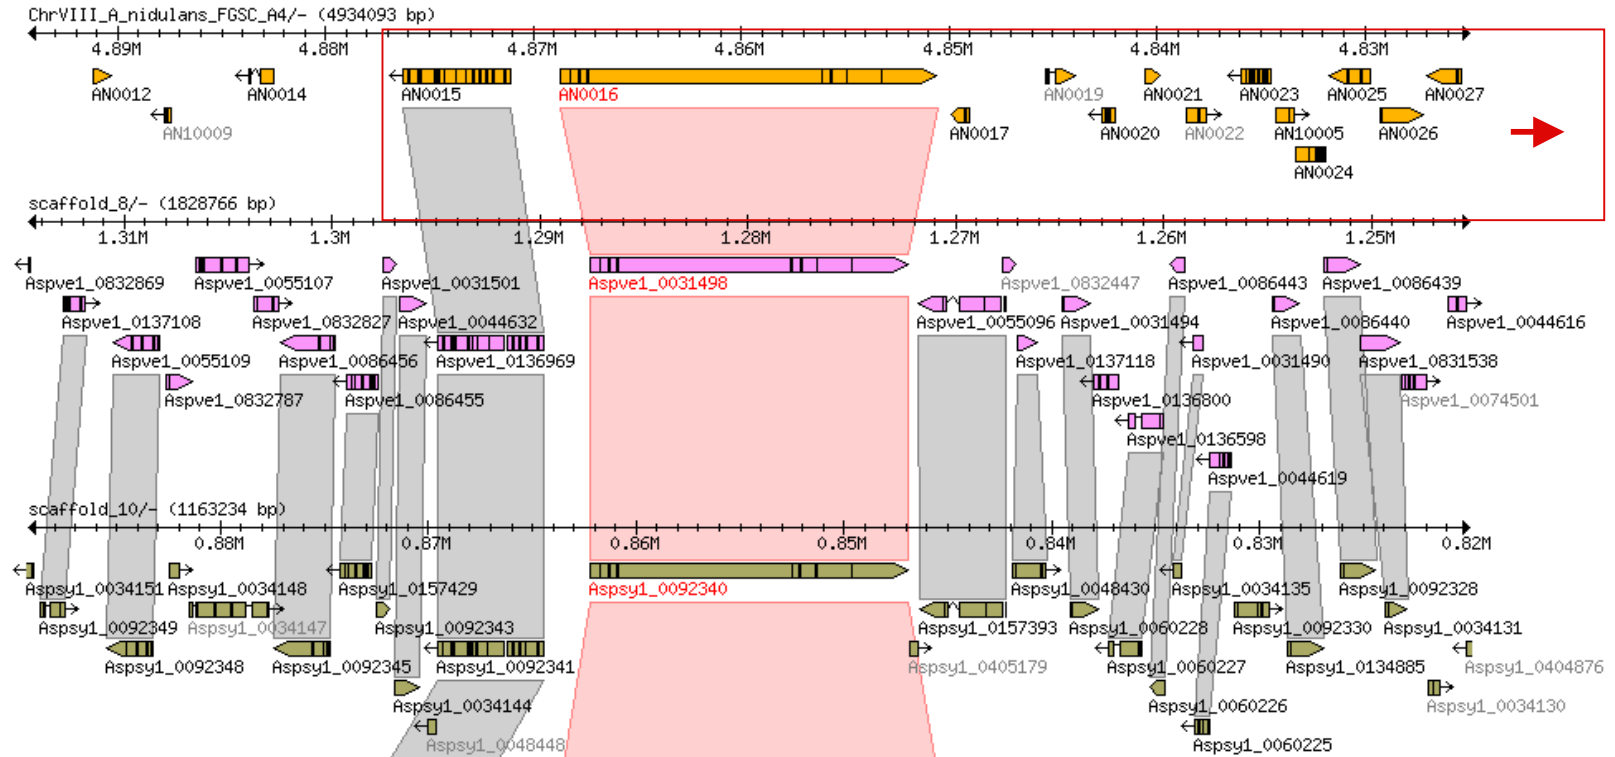

### AN0016 cluster

| Gene id (SMURF)* | Gene positions | Gene distance (SMURF) | Annotated_gene_function (SMURF)     | AspGD gene name | AspGD manual annotation and notes | antiSMASH ID        | Gene ID       |          |
|------------------|----------------|-----------------------|-------------------------------------|-----------------|-----------------------------------|---------------------|---------------|----------|
| n/a              |                |                       |                                     |                 | Protein of unknown function       | prot_ID_562         | AN10009       |          |
| n/a              |                |                       |                                     |                 | Protein of unknown function       | prot_ID_465         | AN0014        |          |
| AN0015.3         | 1              | 2389                  | conserved hypothetical protein      |                 | Transmembrane transporter         | prot_ID_922         | AN0015        | ECS, IGD |
| <b>AN0016.3</b>  | 0              | 0                     | nonribosomal peptide synthase pes1  |                 | Nonribosomal peptide synthase     | <b>prot_ID_1400</b> | <b>AN0016</b> |          |
| AN0017.3         | -1             | 632                   | copper homeostasis protein CutC     |                 | Copper ion homeostasis protein    | prot_ID_169         | AN0017        |          |
| AN0019.3         | -3             | 702                   | conserved hypothetical protein      |                 | Protein of unknown function       | prot_ID_1093        | AN0019        |          |
| AN0020.3         | -4             | 1304                  | conserved hypothetical protein      |                 | Protein of unknown function       | prot_ID_381         | AN0020        |          |
| AN0021.3         | -5             | 1452                  | conserved hypothetical protein      |                 | Protein of unknown function       | prot_ID_837         | AN0021        |          |
| AN0022.3         | -6             | 1246                  | conserved hypothetical protein aglA |                 | alpha-1,4-galactosidase           | prot_ID_1311        | AN0022        |          |
| AN0023.3         | -7             | 1592                  | conserved hypothetical protein      |                 | Oxidoreductase                    | prot_ID_85          | AN0023        |          |
| AN10005.3        | -8             | 290                   | hypothetical protein                |                 | Oxidoreductase                    | prot_ID_403         | AN10005       |          |
| AN0024.3         | -9             | 34                    | conserved hypothetical protein      |                 | Oxidoreductase                    | prot_ID_541         | AN0024        |          |
| AN0025.3         | -10            | 173                   | conserved hypothetical protein      |                 | N,N-dimethylaniline monooxygenase | prot_ID_1007        | AN0025        |          |
| AN0026.3         | -11            | 514                   | conserved hypothetical protein      |                 | Zn(II)2Cys6 transcription factor  | n/a                 | AN0026        |          |
| AN0027.3         | -12            | 61                    | conserved hypothetical protein      |                 | N,N-dimethylaniline monooxygenase | n/a                 | AN0027        |          |
| AN0028.3         | -13            | 388                   | conserved hypothetical protein      |                 | Hydrolase                         | n/a                 | AN0028        |          |
| AN0029.3         | -14            | 482                   | conserved hypothetical protein      |                 | Transmembrane transporter         | n/a                 | AN0029        | FA       |

## AN0607 (sidC) cluster

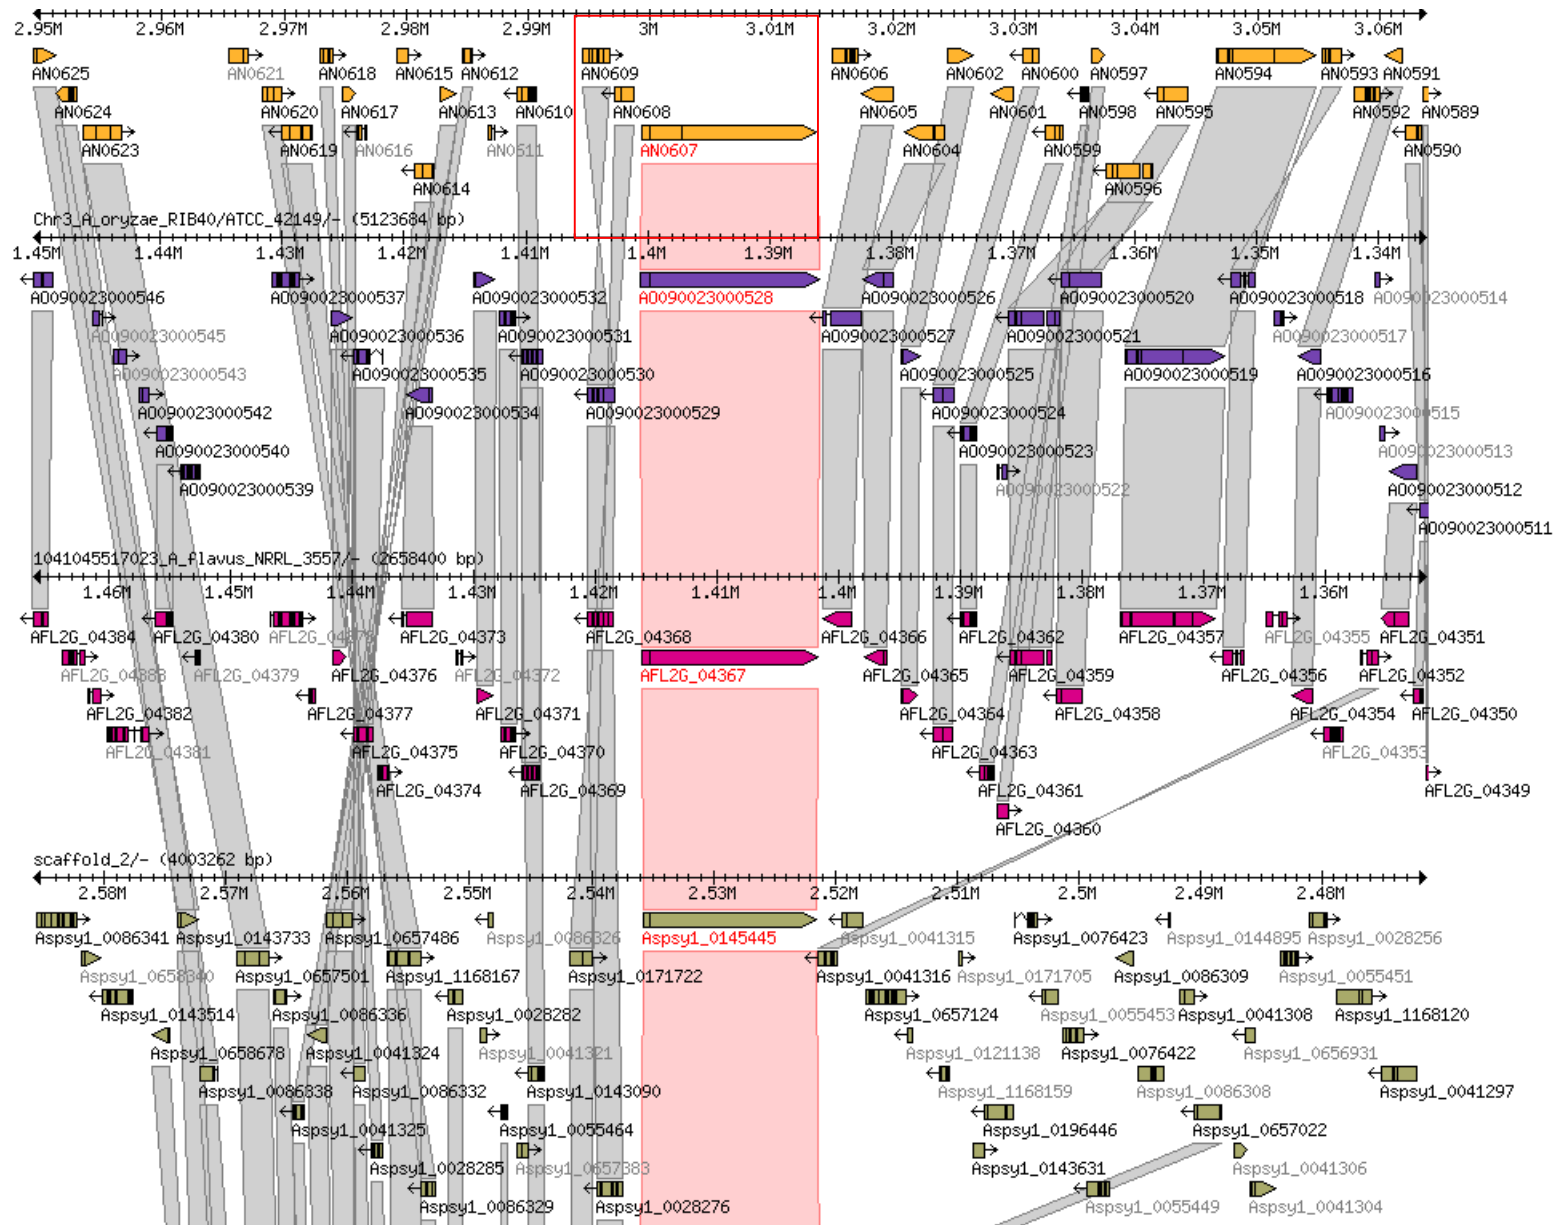

**AN0607 (sidC) cluster**

| Gene id (SMURF)* | Gene positions | Gene distance | Annotated_gene_function (SMURF)                | AspGD gene name  | AspGD manual annotation and notes                                 | antiSMASH ID       | Gene ID       |          |
|------------------|----------------|---------------|------------------------------------------------|------------------|-------------------------------------------------------------------|--------------------|---------------|----------|
| AN0592.3         | 14             | 1007          | conserved hypothetical protein                 |                  | RNA binding protein                                               | n/a                | AN0592        |          |
| AN0593.3         | 13             | 579           | conserved hypothetical protein                 |                  | Dehydrogenase                                                     | n/a                | AN0593        |          |
| AN0594.3         | 12             | 2588          | conserved hypothetical protein                 |                  | Cell morphogenesis protein                                        | n/a                | AN0594        |          |
| AN0595.3         | 11             | 596           | NADPH--cytochrome P450 reductase               |                  | NADPH-cytochrome P450 reductase                                   | n/a                | AN0595        |          |
| AN0596.3         | 10             | 420           | conserved hypothetical protein ddbA            |                  | DNA damage binding protein                                        |                    | AN0596        |          |
| AN0597.3         | 9              | 453           | hypothetical protein                           |                  | Protein of unknown function                                       | n/a                | AN0597        |          |
| AN0598.3         | 8              | 1584          | conserved hypothetical protein                 |                  | Ortholog(s) have role in response to DNA damage stimulus          | n/a                | AN0598        |          |
| AN0599.3         | 7              | 425           | conserved hypothetical protein                 |                  | Oxidoreductase                                                    | prot_ID_1569       | AN0599        |          |
| AN0600.3         | 6              | 1051          | conserved hypothetical protein                 |                  | Protein of unknown function                                       | prot_ID_1023       | AN0600        |          |
| AN0601.3         | 5              | 1423          | conserved hypothetical protein                 |                  | Transmembrane transporter                                         | prot_ID_1496       | AN0601        |          |
| AN0602.3         | 4              | 1202          | conserved hypothetical protein                 |                  | Protein of unknown function                                       | prot_ID_273        | AN0602        |          |
| AN0604.3         | 3              | 1058          | conserved hypothetical protein                 |                  | Endonuclease                                                      | prot_ID_1195       | AN0604        |          |
| AN0605.3         | 2              | 309           | conserved hypothetical protein                 |                  | Protein of unknown function                                       | prot_ID_1650       | AN0605        |          |
| AN0606.3         | 1              | 1226          | conserved hypothetical protein                 | <b>CYP5076A1</b> | Cytochrome P450                                                   | prot_ID_431        | AN0606        |          |
| <b>AN0607.3</b>  | 0              | 0             | nonribosomal peptide siderophore synthase SidC | <b>sidC</b>      | <b>Non-ribosomal peptide synthetase, siderophore biosynthesis</b> | <b>prot_ID_887</b> | <b>AN0607</b> | ECS      |
| n/a              |                |               |                                                |                  | <b>Protein of unknown function</b>                                | prot_ID_1364       | AN0608        |          |
| n/a              |                |               |                                                |                  | <b>N',N'',N'''-triacetylfusarinine C biosynthetic protein</b>     | prot_ID_134        | AN0609        | ECS, IGD |
| n/a              |                |               |                                                |                  | VIC potassium ion channel, beta subunit                           | prot_ID_1109       | AN0610        |          |
| n/a              |                |               |                                                |                  | Protein of unknown function                                       | prot_ID_1573       | AN0611        |          |
| n/a              |                |               |                                                |                  | Protein of unknown function                                       | prot_ID_348        | AN0612        |          |
| n/a              |                |               |                                                |                  | Protein of unknown function                                       | prot_ID_803        | AN0613        |          |
| n/a              |                |               |                                                |                  | Transmembrane transporter                                         | prot_ID_1277       | AN0614        |          |
| n/a              |                |               |                                                |                  | Protein of unknown function                                       | prot_ID_53         | AN0615        |          |
| n/a              |                |               |                                                |                  | Protein of unknown function                                       | prot_ID_508        | AN0616        |          |
| n/a              |                |               |                                                |                  | Lyase domain predicted                                            | prot_ID_968        | AN0617        |          |

## AN10289 cluster

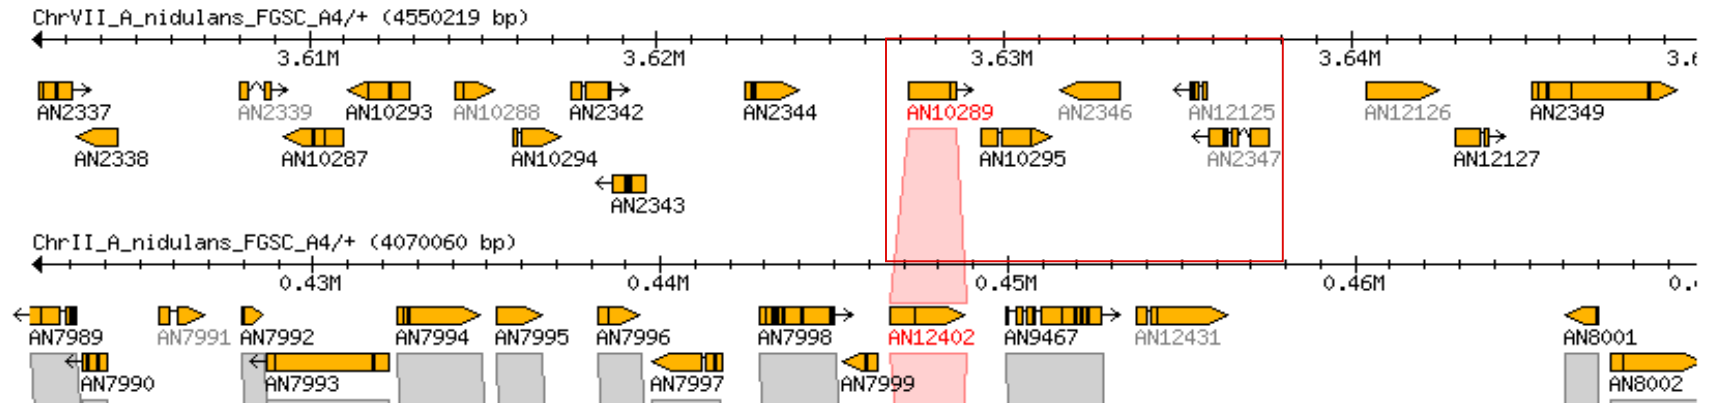

**AN10289 cluster**

| Gene id (SMURF)* | Gene positions | Gene distance (SMURF) | Annotated_gene_function (SMURF)                                                                                    | AspGD gene name  | AspGD manual annotation and notes                            | antiSMASH ID        | Gene ID        |         |
|------------------|----------------|-----------------------|--------------------------------------------------------------------------------------------------------------------|------------------|--------------------------------------------------------------|---------------------|----------------|---------|
| n/a              |                |                       |                                                                                                                    |                  | Protein of unknown function                                  | n/a                 | AN2339         |         |
| n/a              |                |                       |                                                                                                                    |                  | Protein of unknown function                                  | n/a                 | AN10287        |         |
| n/a              |                |                       |                                                                                                                    |                  | Protein of unknown function                                  | n/a                 | AN10293        |         |
| n/a              |                |                       |                                                                                                                    |                  | Protein of unknown function                                  | n/a                 | AN10288        |         |
| AN10294.3        | 4              | 312                   | conserved hypothetical protein                                                                                     |                  | Zn(II)2Cys6 transcription factor                             | prot_ID_162         | AN10294        |         |
| AN2342.3         | 3              | 136                   | conserved hypothetical protein                                                                                     |                  | Protein of unknown function                                  | prot_ID_1034        | AN2342         |         |
| AN2343.3         | 2              | 2917                  | conserved hypothetical protein                                                                                     |                  | Nitroreductase                                               | prot_ID_364         | AN2343         |         |
| AN2344.3         | 1              | 3119                  | conserved hypothetical protein                                                                                     |                  | Transmembrane transporter                                    | prot_ID_1175        | AN2344         |         |
| <b>AN10289.3</b> | 0              | 0                     | DMATS type aromatic prenyltransferase                                                                              |                  | <b>DMATS-type aromatic prenyltransferase</b>                 | <b>prot_ID_1122</b> | <b>AN10289</b> | IGD     |
| AN10295.3        | -1             | 742                   | conserved hypothetical protein                                                                                     |                  | <b>B-zip transcription factor</b>                            | prot_ID_981         | AN10295        |         |
| AN2346.3         | -2             | 670                   | conserved hypothetical protein                                                                                     |                  | <b>Protein of unknown function</b>                           | prot_ID_1323        | AN2346         |         |
| n/a              |                |                       |                                                                                                                    |                  | <b>Protein of unknown function</b>                           | prot_ID_1498        | AN12125        |         |
| AN2347.3         | -3             | 2567                  | conserved hypothetical protein                                                                                     | <b>CYP504E4P</b> | <b>Cytochrome P450; possibly a pseudogene</b>                | prot_ID_650         | AN2347         | FA, IGD |
| AN2348.3         | -4             | 2821                  | conserved hypothetical protein<br>hypothetical protein similar to ATP-binding cassette multidrug transport protein |                  | Deleted ORF<br>ABC transporter of the P-glycoprotein cluster | n/a                 | AN2348         |         |
| AN2349.3         | -5             | 1443                  | ATRC                                                                                                               | atrC             |                                                              | n/a                 | AN2349         |         |

## AN10297 cluster

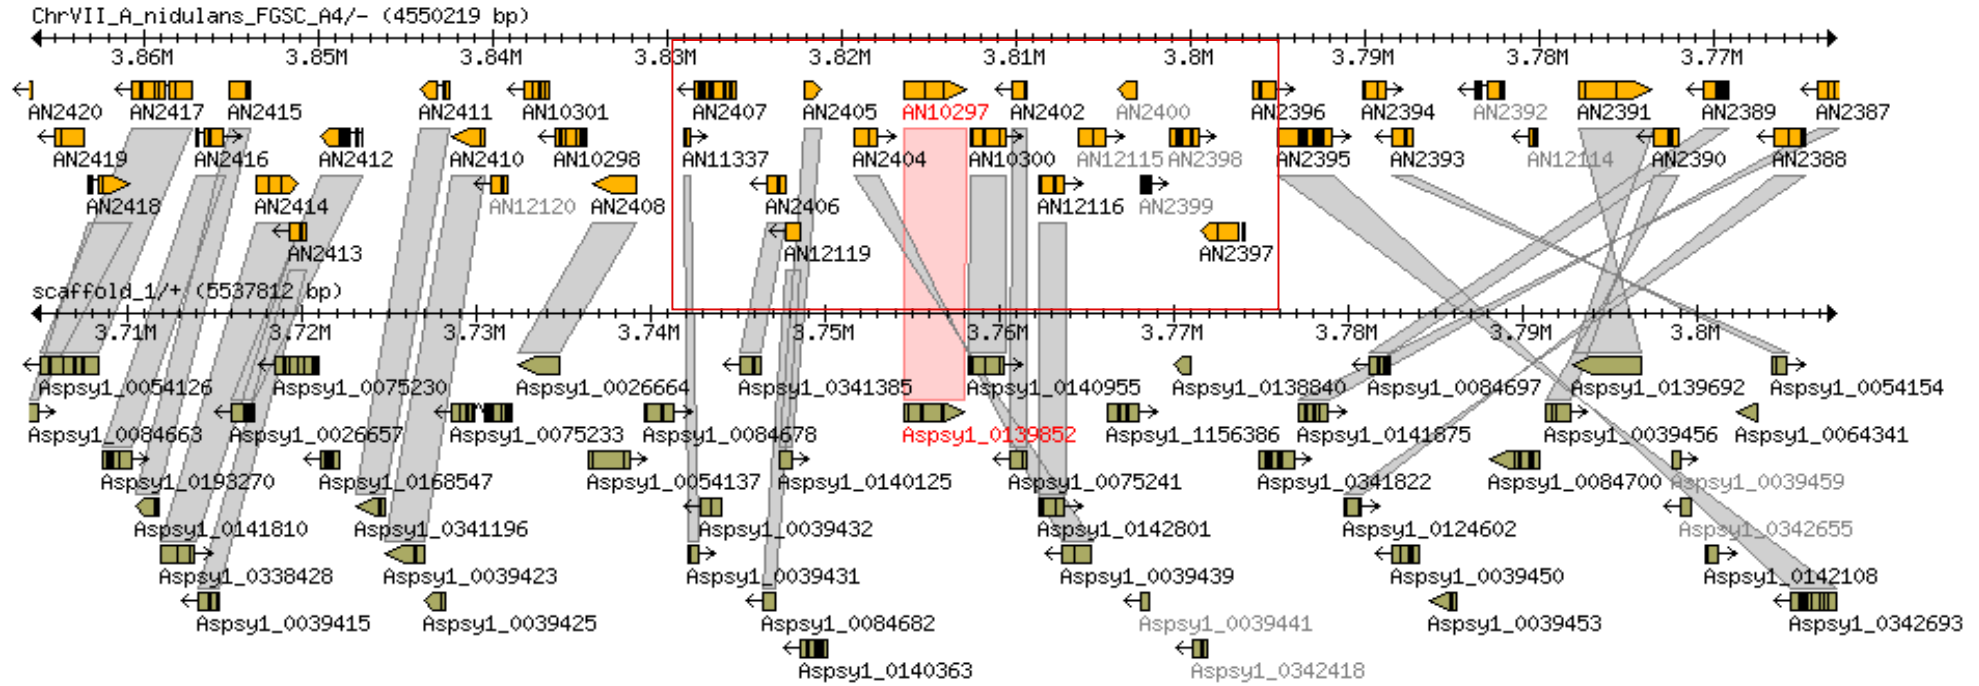



### AN10297 cluster

| Gene id (SMURF)* | Gene positions | Gene distance | Annotated_gene_function (SMURF) | AspGD gene name | AspGD manual annotation and notes                                | antiSMASH ID        | Gene ID        |    |
|------------------|----------------|---------------|---------------------------------|-----------------|------------------------------------------------------------------|---------------------|----------------|----|
| AN2392.3         | 13             | 2333          | conserved hypothetical protein  |                 | bHLH transcription factor                                        | n/a                 |                |    |
| AN11336.3        | 12             | 1051          | predicted protein               |                 | Deleted by the Broad                                             | n/a                 |                |    |
| AN2393.3         | 11             | 506           | conserved hypothetical protein  |                 | Short chain oxidoreductase/dehydrogenase                         | n/a                 |                |    |
| AN2394.3         | 10             | 1565          | conserved hypothetical protein  |                 | Protein of unknown function                                      | n/a                 |                |    |
| AN2395.3         | 9              | 1167          | conserved hypothetical protein  |                 | beta-glucuronidase                                               | prot_ID_1215        | AN2395         |    |
| AN2396.3         | 8              | 704           | conserved hypothetical protein  |                 | Oxidoreductase                                                   | prot_ID_543         | AN2396         | FA |
| AN2397.3         | 7              | 144           | conserved hypothetical protein  |                 | Protein of unknown function                                      | prot_ID_1361        | AN2397         |    |
| AN2398.3         | 6              | 1196          | conserved hypothetical protein  |                 | O-methyltransferase                                              | prot_ID_691         | AN2398         |    |
| AN2399.3         | 5              | 281           | conserved hypothetical protein  |                 | Protein of unknown function                                      | prot_ID_23          | AN2399         |    |
| AN2400.3         | 4              | 525           | hypothetical protein            |                 | Protein of unknown function                                      | prot_ID_557         | AN2400         |    |
| AN2401.3         | 3              | 664           | conserved hypothetical protein  |                 | Deleted ORF; AN2401 split into AN12115 and AN12116               | n/a                 |                |    |
| n/a              |                |               |                                 |                 | Protein of unknown function                                      | prot_ID_1530        | AN12115        |    |
| n/a              |                |               |                                 |                 | Transmembrane transporter                                        | prot_ID_1543        | AN12116        |    |
| AN2402.3         | 2              | 414           | conserved hypothetical protein  |                 | Oxidoreductase                                                   | prot_ID_704         | AN2402         |    |
| AN10300.3        | 1              | 403           | conserved hypothetical protein  |                 | Zn(II)2Cys6 transcription factor                                 | prot_ID_316         | AN10300        |    |
| <b>AN10297.3</b> | 0              | 0             | NRPS-like enzyme                |                 | NAD-binding acyl CoA synthetase                                  | <b>prot_ID_1121</b> | <b>AN10297</b> |    |
| AN2404.3         | -1             | 1650          | conserved hypothetical protein  |                 | Protein of unknown function                                      | prot_ID_849         | AN2404         |    |
| AN2405.3         | -2             | 1952          | conserved hypothetical protein  |                 | Methyltransferase                                                | prot_ID_171         | AN2405         |    |
| n/a              |                |               |                                 |                 | Protein of unknown function                                      | prot_ID_1486        | AN12119        |    |
| AN2406.3         | -3             | 1109          | conserved hypothetical protein  |                 | N-methyltransferase                                              | prot_ID_992         | AN2406         |    |
| AN2407.3         | -4             | 1905          | conserved hypothetical protein  |                 | Domain(s) with predicted role in isoprenoid biosynthetic process | prot_ID_314         | AN2407         |    |
| AN11337.3        | -5             | 166           | predicted protein               |                 | Protein of unknown function                                      | prot_ID_861         | AN11337        | FA |
| AN2408.3         | -6             | 2805          | conserved hypothetical protein  |                 | Protein of unknown function                                      | prot_ID_1132        | AN2408         |    |
| AN10298.3        | -7             | 539           | conserved hypothetical protein  |                 | 3-phosphoserine aminotransferase                                 | prot_ID_453         | AN10298        |    |
| AN10301.3        | -8             | 428           | conserved hypothetical protein  |                 | Domain(s) with predicted nucleotide binding activity             | n/a                 | AN10301        |    |

## AN10396 cluster

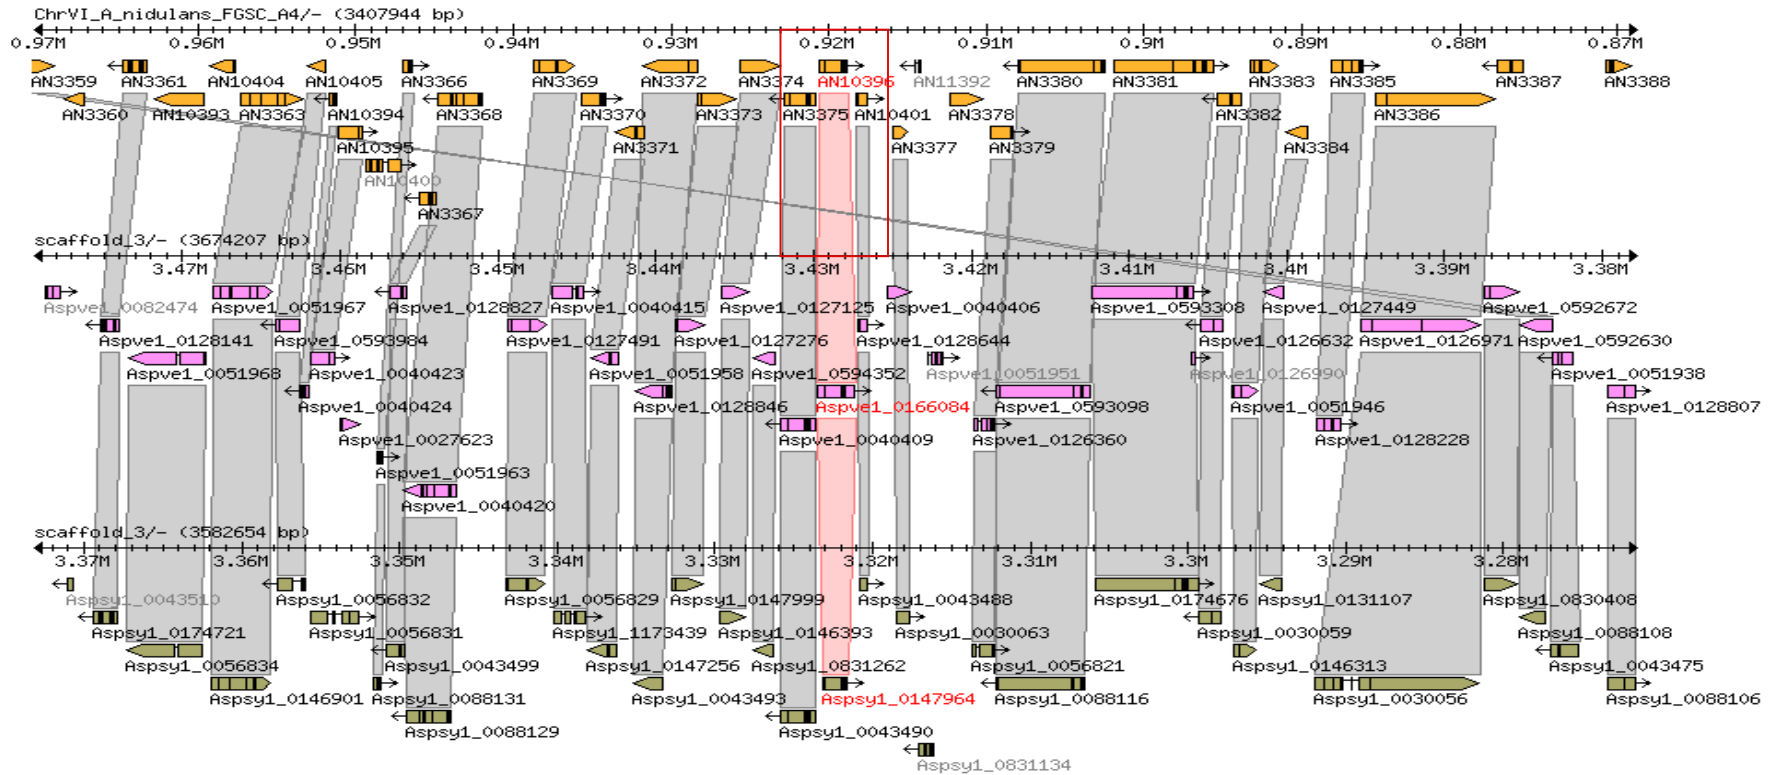

**AN10396 cluster**

| Gene id<br>(SMURF)* | Gene<br>positions | Gene<br>distance (SMURF) | Annotated_gene_function | AspGD<br>gene name | AspGD manual annotation and notes                                  | antiSMASH ID | Gene ID        |          |
|---------------------|-------------------|--------------------------|-------------------------|--------------------|--------------------------------------------------------------------|--------------|----------------|----------|
| n/a                 |                   |                          |                         |                    | Zn(II)2Cys6 transcription factor                                   | n/a          | AN3369         |          |
| n/a                 |                   |                          |                         |                    | Protein of unknown function                                        | n/a          | AN3370         |          |
| n/a                 |                   |                          |                         |                    | Protein of unknown function                                        | n/a          | AN3371         |          |
| n/a                 |                   |                          |                         | scaA               | Camptothecin resistance conferring protein rcaA                    | prot_ID_244  | AN3372         |          |
| n/a                 |                   |                          |                         |                    | DNA-directed polymerase kappa                                      | prot_ID_844  | AN3373         |          |
| n/a                 |                   |                          |                         |                    | Protein of unknown function                                        | prot_ID_352  | AN3374         |          |
| n/a                 |                   |                          |                         |                    | DnaJ domain protein<br>Farnesyl-diphosphate<br>farnesyltransferase | prot_ID_957  | AN3375         | ECS      |
| n/a                 |                   |                          |                         |                    | Protein of unknown function                                        | prot_ID_418  | <b>AN10396</b> |          |
| n/a                 |                   |                          |                         |                    | Aspartic-type endopeptidase                                        | prot_ID_1029 | AN10401        | ECS, IGD |
| n/a                 |                   |                          |                         |                    | Protein of unknown function                                        | prot_ID_1064 | AN3377         |          |
| n/a                 |                   |                          |                         |                    | Protein of unknown function                                        | prot_ID_454  | AN11392        |          |
| n/a                 |                   |                          |                         |                    | homocysteine S-methyltransferase                                   | prot_ID_555  | AN3378         |          |
| n/a                 |                   |                          |                         |                    | Protein of unknown function                                        | prot_ID_69   | AN3379         |          |

## AN10430 cluster

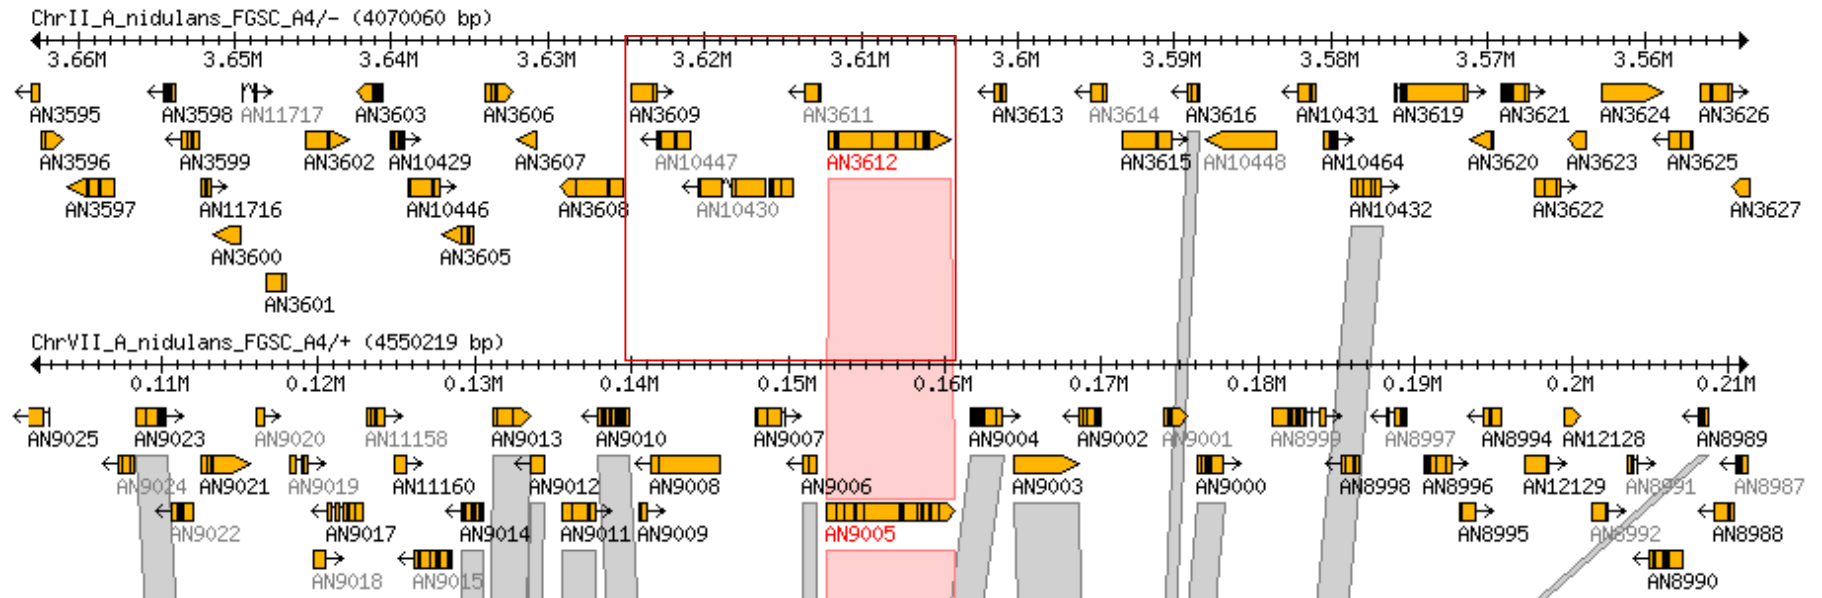

### AN10430 cluster

| Gene id (SMURF)* | Gene positions | Gene distance (SMURF) | Annotated_gene_function                                      | AspGD gene name | AspGD manual annotation and notes                 | antiSMASH ID       | Gene ID        |    |
|------------------|----------------|-----------------------|--------------------------------------------------------------|-----------------|---------------------------------------------------|--------------------|----------------|----|
| n/a              |                |                       |                                                              |                 | Phosphoserine phosphatase                         | prot_ID_665        | AN10429        |    |
| n/a              |                |                       |                                                              |                 | Phosphoprotein phosphatase                        | prot_ID_59         | AN10446        |    |
| n/a              |                |                       |                                                              |                 | Oxidoreductase                                    | prot_ID_906        | AN3605         |    |
| n/a              |                |                       |                                                              |                 | Protein of unknown function                       | prot_ID_296        | AN3606         |    |
| n/a              |                |                       |                                                              | IreB            | zinc-finger transcription factor                  | prot_ID_1042       | AN3607         |    |
| AN3608.3         | 3              | 506                   | hypothetical protein similar to ABC transporter protein AtrC | atrC            | ABC transporter                                   | prot_ID_423        | AN3608         |    |
| AN3609.3         | 2              | 25                    | conserved hypothetical protein                               | CYP681A1        | Cytochrome P450                                   | prot_ID_1168       | AN3609         | FA |
| AN10447.3        | 1              | 615                   | conserved hypothetical protein                               |                 | Acyl transferase                                  | prot_ID_789        | AN10447        |    |
| <b>AN10430.3</b> | 0              | 0                     | polyketide synthase                                          |                 | Polyketide synthase                               | <b>prot_ID_886</b> | <b>AN10430</b> |    |
| AN3611.3         | -1             | 773                   | conserved hypothetical protein                               |                 | Protein of unknown function                       | prot_ID_769        | AN3611         |    |
| AN3612.3         | -2             | 425                   | polyketide synthase                                          |                 | Polyketide synthase                               | prot_ID_164        | AN3612         | FA |
| n/a              |                |                       |                                                              | xlnA            | Endo-1,4-beta-xylanase                            | prot_ID_903        | AN3613         |    |
| n/a              |                |                       |                                                              |                 | Protein of unknown function                       | prot_ID_292        | AN3614         |    |
| n/a              |                |                       |                                                              |                 | Predicted ATP binding, nucleoside-triphosphatase  | prot_ID_1039       | AN3615         |    |
| n/a              |                |                       |                                                              |                 | Oxidoreductase                                    | prot_ID_421        | AN3616         |    |
| n/a              |                |                       |                                                              | tprA            | Tetratricopeptide repeat (TPR)-containing protein | prot_ID_186        | AN10448        |    |

# AN10486 cluster

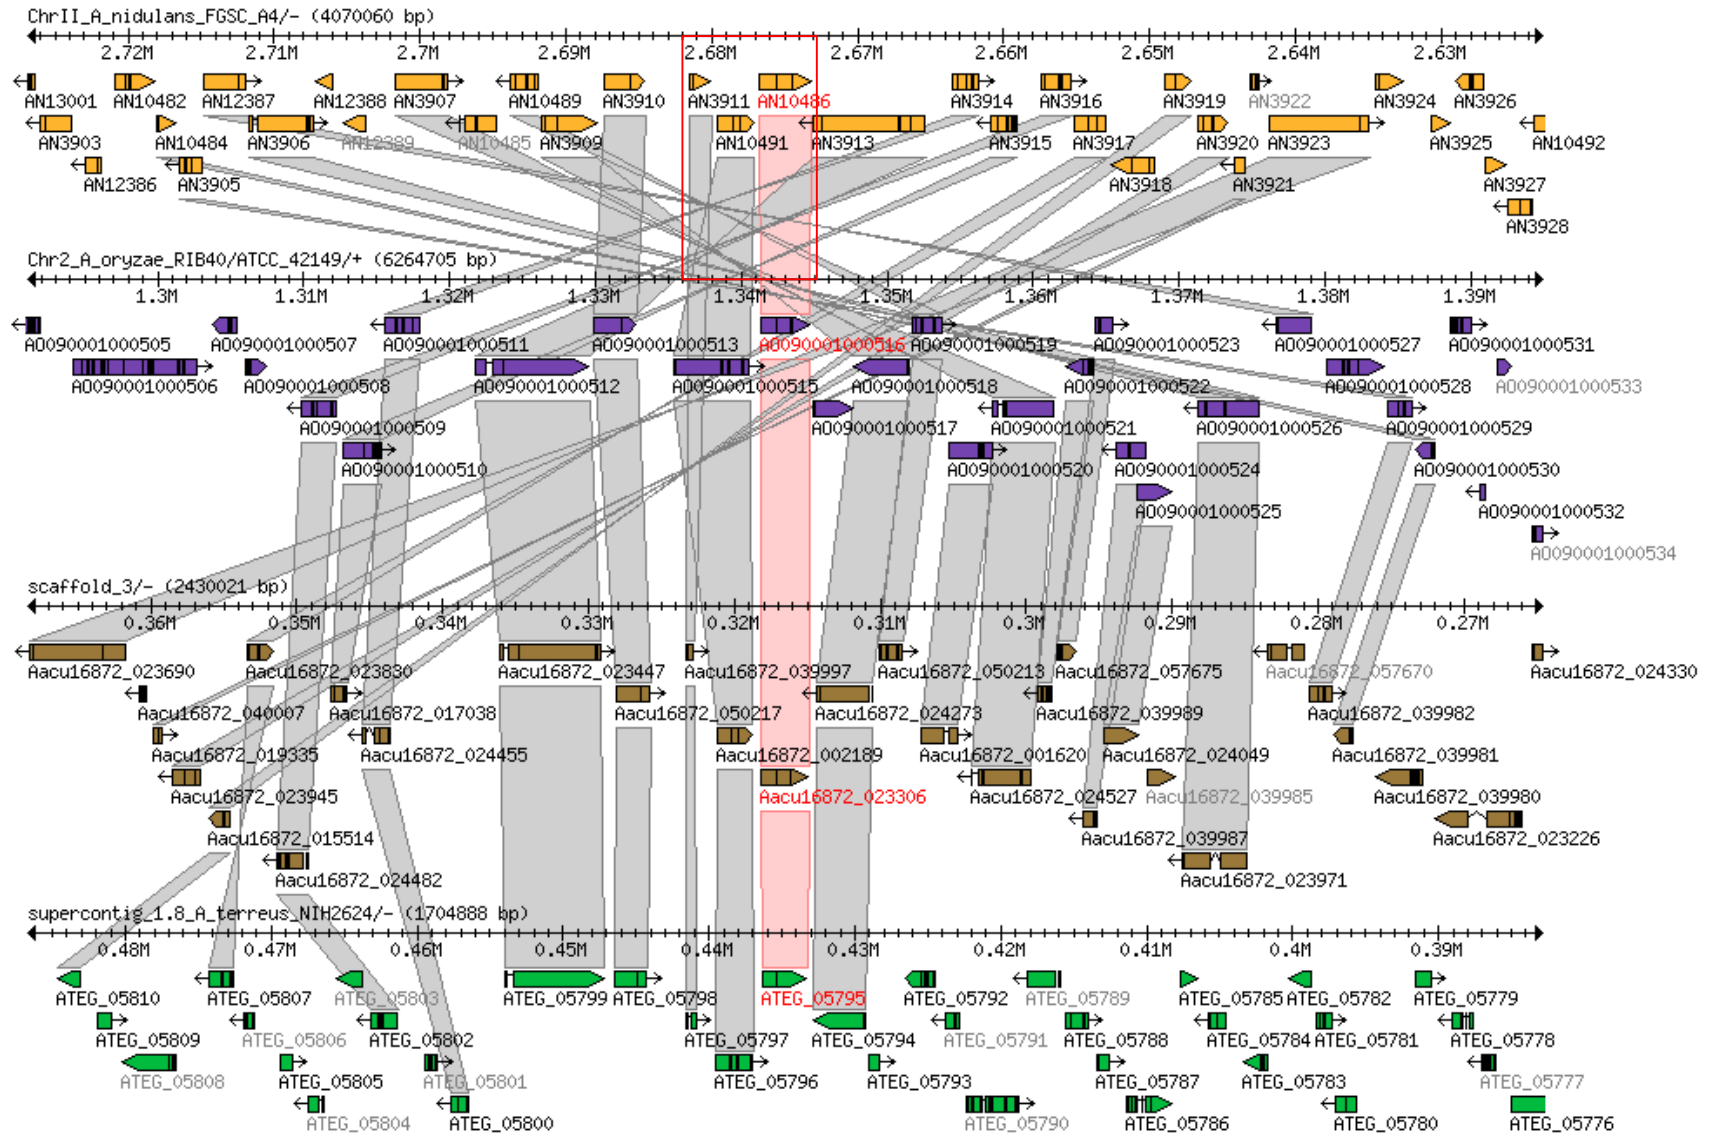

### AN10486 cluster

| Gene id (SMURF)* | Gene positions | Gene distance (SMURF) | Annotated_gene_function                           | AspGD gene name | AspGD manual annotation and notes             | antiSMASH ID       | Gene ID        |     |
|------------------|----------------|-----------------------|---------------------------------------------------|-----------------|-----------------------------------------------|--------------------|----------------|-----|
| n/a              |                |                       |                                                   |                 | Serine/threonine protein kinase               | prot_ID_1180       | AN10485        |     |
| n/a              |                |                       |                                                   | FKBP5           | FKBP-type peptidyl-prolyl cis-trans isomerase | prot_ID_92         | AN10489        |     |
| n/a              |                |                       |                                                   |                 | Deoxycytidyl transferase                      | prot_ID_451        | AN3909         |     |
| n/a              |                |                       |                                                   |                 | Sister chromatid separation protein           | prot_ID_670        | AN3910         |     |
| AN3911.3         | 2              | 769                   | hypothetical protein similar to SndA              |                 | Zn(II)2Cys6 transcription factor              | prot_ID_67         | AN3911         | ECS |
| AN10491.3        | 1              | 532                   | conserved hypothetical protein                    |                 | Zn(II)2Cys6 transcription factor              | prot_ID_1053       | AN10491        |     |
| <b>AN10486.3</b> | 0              | 0                     | NRPS-like enzyme                                  |                 | NRPS-like enzyme                              | <b>prot_ID_566</b> | <b>AN10486</b> | ECS |
| AN3913.3         | -1             | 673                   | hypothetical protein similar to adenylate cyclase | cyaA            | Adenylate cyclase                             | prot_ID_192        | AN3913         |     |
| AN3914.3         | -2             | 2816                  | conserved hypothetical protein                    | crhA            | Transglycosidase                              | prot_ID_937        | AN3914         |     |
| AN10490.3        | -3             | 35                    | predicted protein                                 |                 | Deleted by the Broad                          |                    |                |     |
| AN3915.3         | -4             | 648                   | conserved hypothetical protein                    |                 | Transmembrane transporter                     | prot_ID_321        | AN3915         |     |
| AN3916.3         | -5             | 2058                  | conserved hypothetical protein                    |                 | Glycerol kinase                               | prot_ID_1070       | AN3916         |     |
| AN3917.3         | -6             | 195                   | conserved hypothetical protein                    | CYP539D1        | Putative cytochrome P450                      | prot_ID_448        | AN3917         |     |

## AN11065 cluster

No manual prediction made, functional annotations unrelated to secondary metabolism

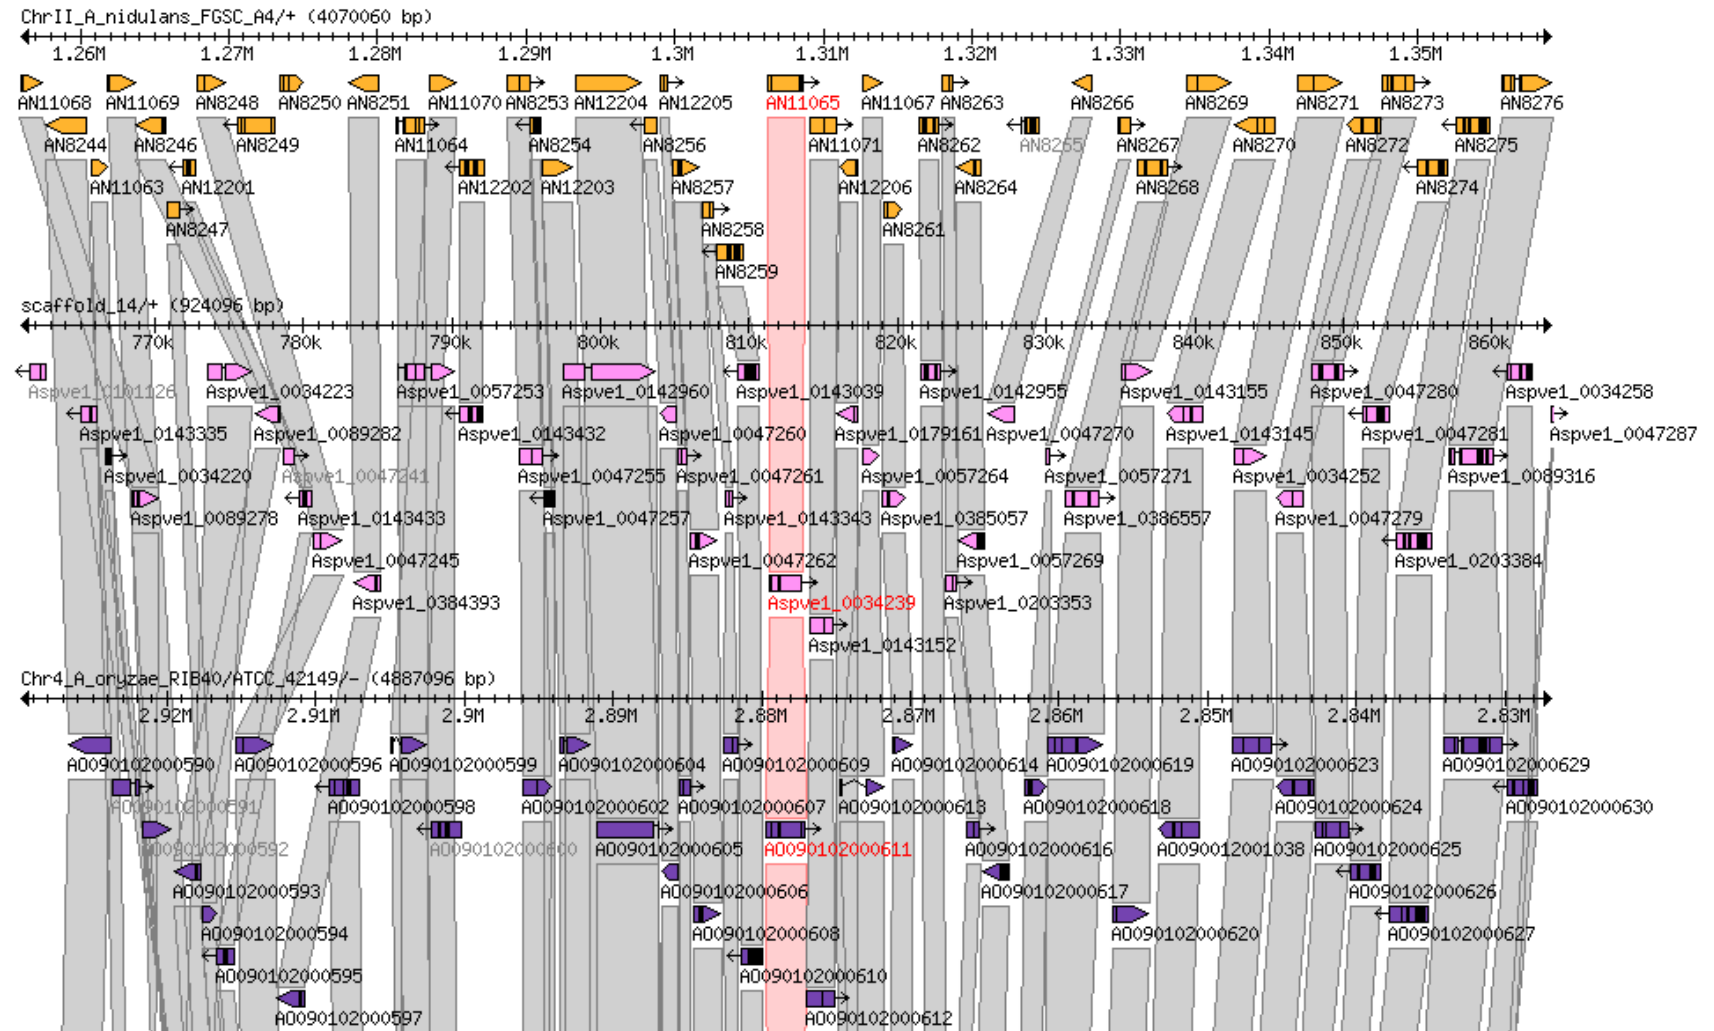



**AN11065 cluster**

| Gene id<br>(SMURF)* | Gene<br>positions | Gene<br>distance (SMURF) | Annotated_gene_function | AspGD<br>gene name | AspGD manual annotation and notes                                  | antiSMASH ID       | Gene ID        |
|---------------------|-------------------|--------------------------|-------------------------|--------------------|--------------------------------------------------------------------|--------------------|----------------|
| n/a                 |                   |                          |                         |                    | Protein of unknown function                                        | prot_ID_1372       | AN12204        |
| n/a                 |                   |                          |                         |                    | 50S ribosomal protein L27                                          | prot_ID_335        | AN8256         |
| n/a                 |                   |                          |                         |                    | Protein of unknown function                                        | prot_ID_1416       | AN12205        |
| n/a                 |                   |                          |                         |                    | Scramblase family protein                                          | prot_ID_1080       | AN8257         |
| n/a                 |                   |                          |                         |                    | Ubiquitin-conjugating enzyme                                       | prot_ID_464        | AN8258         |
| n/a                 |                   |                          |                         |                    | Endodeoxyribonuclease                                              | prot_ID_1209       | AN8259         |
| n/a                 |                   |                          |                         |                    | Oxidosqualene-lanosterol cyclase                                   | <b>prot_ID_389</b> | <b>AN11065</b> |
| n/a                 |                   |                          |                         |                    | SGT1 and CS domain protein                                         | prot_ID_256        | AN11071        |
| n/a                 |                   |                          |                         |                    | Protein of unknown function                                        | prot_ID_1439       | AN12206        |
| n/a                 |                   |                          |                         | hstA               | histone deacetylase                                                | prot_ID_521        | AN11067        |
| n/a                 |                   |                          |                         | phoA               | Cyclin-dependent protein kinase<br>Secretin-like G-protein coupled | prot_ID_806        | AN8261         |
| n/a                 |                   |                          |                         | gprH               | receptor                                                           | prot_ID_204        | AN8262         |
| n/a                 |                   |                          |                         |                    | Protein of unknown function                                        | prot_ID_947        | AN8263         |

# AN11080 cluster

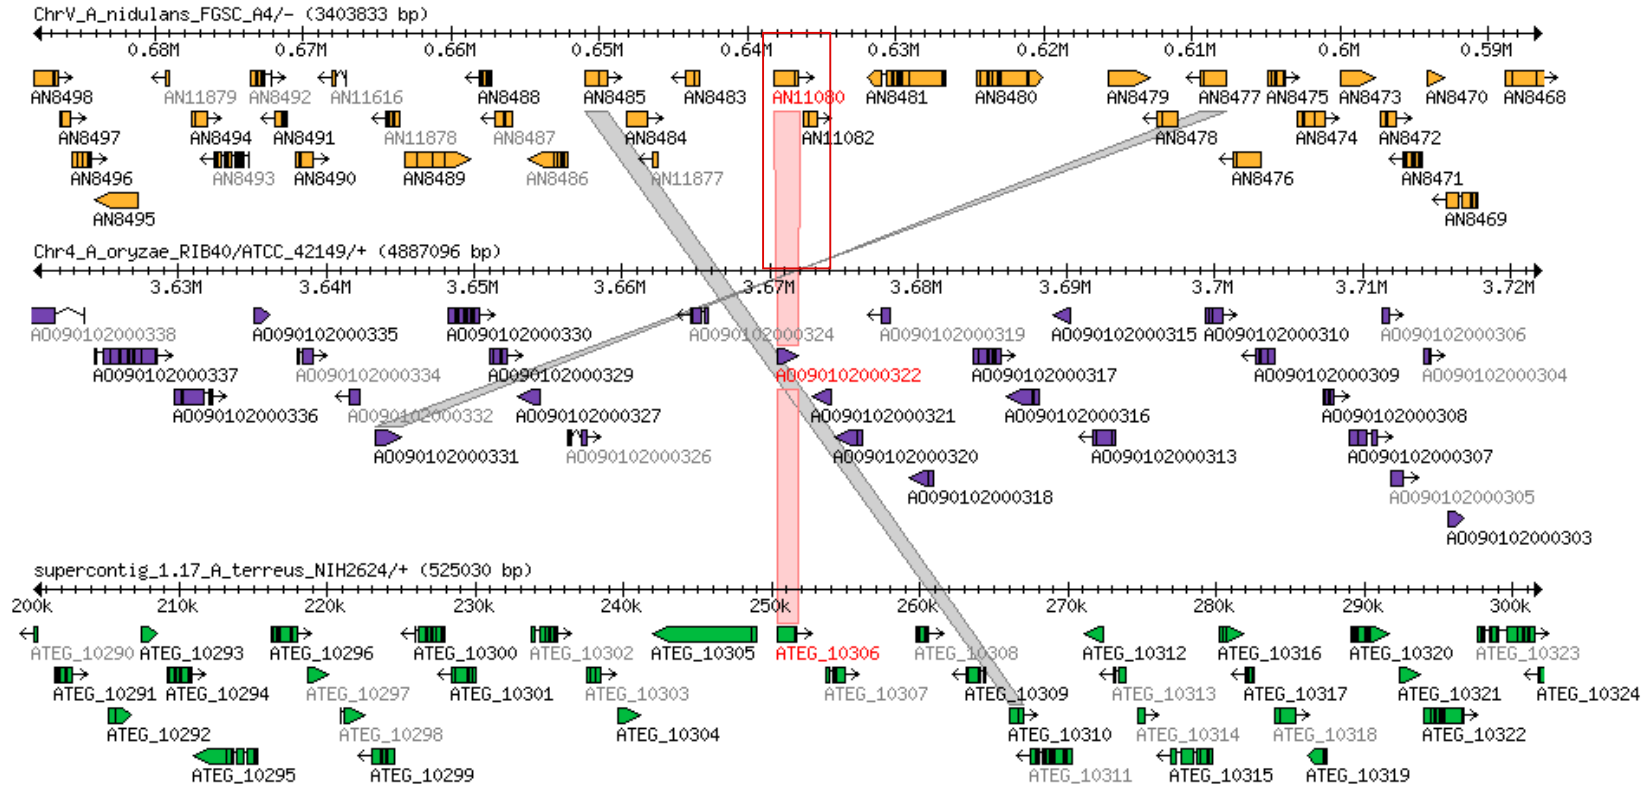

**AN11080 cluster**

| Gene id<br>(SMURF)* | Gene<br>positions | Gene<br>distance (SMURF) | Annotated_gene_function | AspGD<br>gene name | AspGD manual annotation and notes                                       | antiSMASH ID | Gene ID |         |
|---------------------|-------------------|--------------------------|-------------------------|--------------------|-------------------------------------------------------------------------|--------------|---------|---------|
| n/a                 |                   |                          |                         |                    | Glucan 1,3-beta-glucosidase                                             |              |         |         |
| n/a                 |                   |                          |                         |                    | Chitinase                                                               | prot_ID_121  | AN8481  |         |
| n/a                 |                   |                          |                         |                    | Protein of unknown function<br>DMATS-type aromatic<br>prenyltransferase | prot_ID_877  | AN11082 | IGD, FA |
| n/a                 |                   |                          |                         |                    |                                                                         | prot_ID_782  | AN11080 | ECS     |
| n/a                 |                   |                          |                         |                    | Protein of unknown function                                             | prot_ID_224  | AN8483  |         |
| n/a                 |                   |                          |                         |                    | Protein of unknown function                                             | prot_ID_1048 | AN11877 |         |
| n/a                 |                   |                          |                         |                    | GPI-anchored protein                                                    | prot_ID_797  | AN8484  |         |

# AN11191 Cluster

Adjacent clusters, see AN11194 cluster below

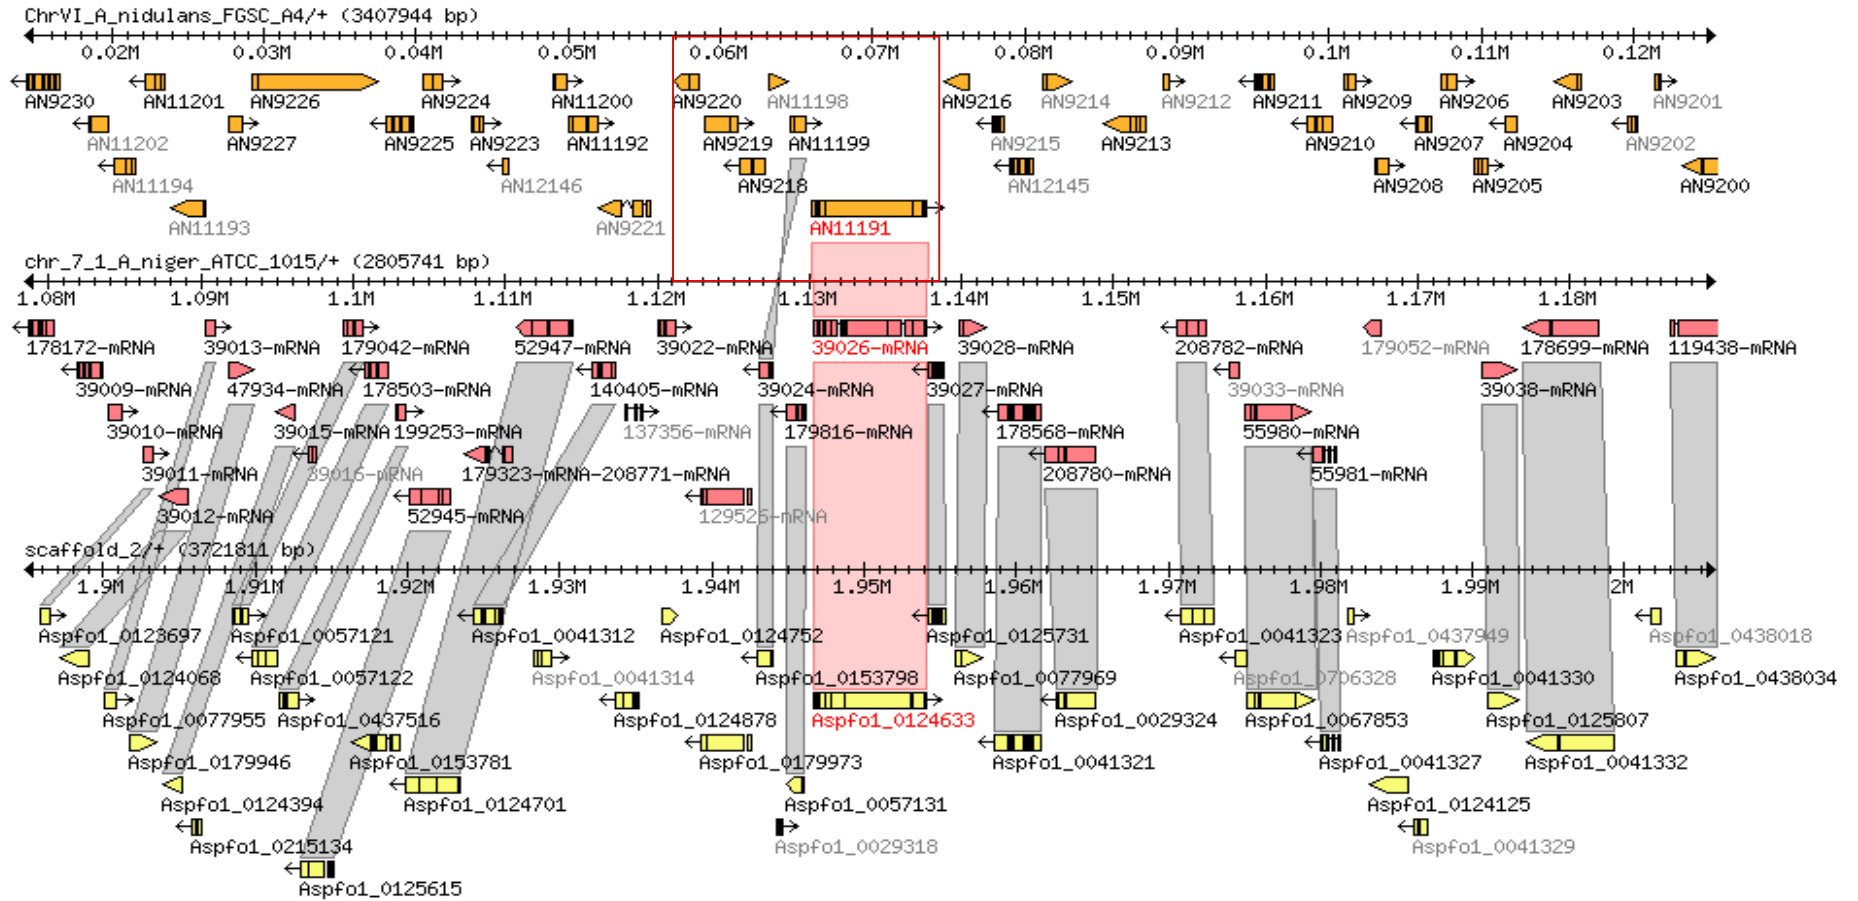

### AN11191 Cluster

| Gene id (SMURF)* | Gene positions | Gene distance (SMURF) | Annotated_gene_function (SMURF) | AspGD gene name | AspGD manual annotation and notes                                                                               | antiSMASH ID       | Gene ID                |
|------------------|----------------|-----------------------|---------------------------------|-----------------|-----------------------------------------------------------------------------------------------------------------|--------------------|------------------------|
| n/a              |                |                       |                                 |                 | extracellular guanyl-specific ribonuclease                                                                      | n/a                |                        |
| n/a              |                |                       |                                 |                 | Protein of unknown function                                                                                     | n/a                |                        |
| n/a              |                |                       |                                 |                 | Protein of unknown function                                                                                     | n/a                |                        |
| AN9210.3         | 8              | 797                   | conserved hypothetical protein  | CYP662A1        | Cytochrome P450                                                                                                 | n/a                |                        |
| AN9211.3         | 7              | 3682                  | conserved hypothetical protein  |                 | Protein of unknown function                                                                                     | n/a                |                        |
| AN11645.3        | 6              | 1849                  | predicted protein               |                 | Deleted by the Broad                                                                                            | n/a                |                        |
| AN9212.3         | 5              | 1255                  | hypothetical protein            |                 | Protein of unknown function                                                                                     | prot_ID_1018       | AN9212                 |
| AN9213.3         | 4              | 987                   | conserved hypothetical protein  |                 | Hydrolase                                                                                                       | prot_ID_516        | AN9213                 |
| AN9214.3         | 3              | 2570                  | conserved hypothetical protein  | CYP550B2        | Cytochrome P450                                                                                                 | prot_ID_27         | AN9214                 |
| n/a              |                |                       |                                 |                 | Protein of unknown function                                                                                     | prot_ID_1153       | AN12145                |
| AN9215.3         | 2              | 1507                  | hypothetical protein            |                 | Protein of unknown function                                                                                     | prot_ID_622        | AN9215                 |
| AN9216.3         | 1              | 992                   | conserved hypothetical protein  |                 | Protein of unknown function                                                                                     | prot_ID_135        | AN9216                 |
| <b>AN11191.3</b> | 0              | 0                     | polyketide synthase             |                 | <b>Polyketide synthase</b>                                                                                      | <b>prot_ID_589</b> | <b>AN11191</b> ECS, EP |
| AN11199.3        | -1             | 408                   | conserved hypothetical protein  |                 | <b>Dihydrofolate reductase</b>                                                                                  | prot_ID_1032       | AN11199                |
| AN11198.3        | -2             | 104                   | conserved hypothetical protein  |                 | <b>Oxidoreductase</b>                                                                                           | prot_ID_425        | AN11198                |
| AN9218.3         | -3             | 187                   | hypothetical protein            | <b>CYP540D1</b> | <b>Cytochrome P450</b>                                                                                          | prot_ID_234        | AN9218                 |
| AN9219.3         | -4             | 313                   | conserved hypothetical protein  |                 | <b>Transmembrane transporter</b>                                                                                | prot_ID_835        | AN9219                 |
| AN9220.3         | -5             | 673                   | conserved hypothetical protein  |                 | <b>Protein of unknown function</b>                                                                              | prot_ID_1014       | AN9220 EP              |
| AN9221.3         | -6             | 1683                  | conserved hypothetical protein  |                 | Zn(II)2Cys6 transcription factor                                                                                | prot_ID_511        | AN9221                 |
| AN11192.3        | -7             | 48                    | conserved hypothetical protein  | CYP664A1        | Cytochrome P450                                                                                                 | prot_ID_108        | AN11192                |
| n/a              |                |                       | conserved hypothetical protein  |                 | Protein of unknown function                                                                                     | prot_ID_329        | AN11200                |
| n/a              |                |                       |                                 |                 | Protein of unknown function                                                                                     | prot_ID_1129       | AN12146                |
| n/a              |                |                       |                                 |                 | Demethylsterigmatocystin 6-O-methyltransferase with a predicted role in sterigmatocystin/aflatoxin biosynthesis |                    | AN9223                 |
| n/a              |                |                       |                                 |                 | Domain(s) with predicted monooxygenase activity and role in oxidation-reduction process                         | n/a                | AN9224                 |
| n/a              |                |                       |                                 |                 | Putative cytochrome P450                                                                                        | n/a                | AN9225                 |
| n/a              |                |                       |                                 |                 | Putative nonribosomal peptide                                                                                   | n/a                | AN9226                 |

|     |                                                                                                                                                                                            |     |         |
|-----|--------------------------------------------------------------------------------------------------------------------------------------------------------------------------------------------|-----|---------|
| n/a | synthase (NRPS)<br>Ortholog(s) have dioxygenase activity n/a<br>and role in secondary metabolite<br>biosynthetic process                                                                   |     | AN9227  |
| n/a | Domain(s) with predicted oxygen<br>transporter activity and role in<br>transport                                                                                                           | n/a | AN11193 |
| n/a | Domain(s) with predicted<br>oxidoreductase activity and role in<br>carotenoid biosynthetic process,<br>chlorophyll biosynthetic process,<br>oxidation-reduction process,<br>photosynthesis | n/a | AN11201 |
| n/a | Putative dimethyl-allyl-tryptophan<br>synthase (dmats) type aromatic<br>prenyltransferase                                                                                                  | n/a | AN11194 |
| n/a | Putative dimethyl-allyl-tryptophan<br>synthase (DMATS) type aromatic<br>prenyltransferase                                                                                                  | n/a | AN11202 |
| n/a | Domain(s) with predicted<br>monooxygenase activity and role in<br>oxidation-reduction process                                                                                              | n/a | AN9230  |

# AN11194 cluster

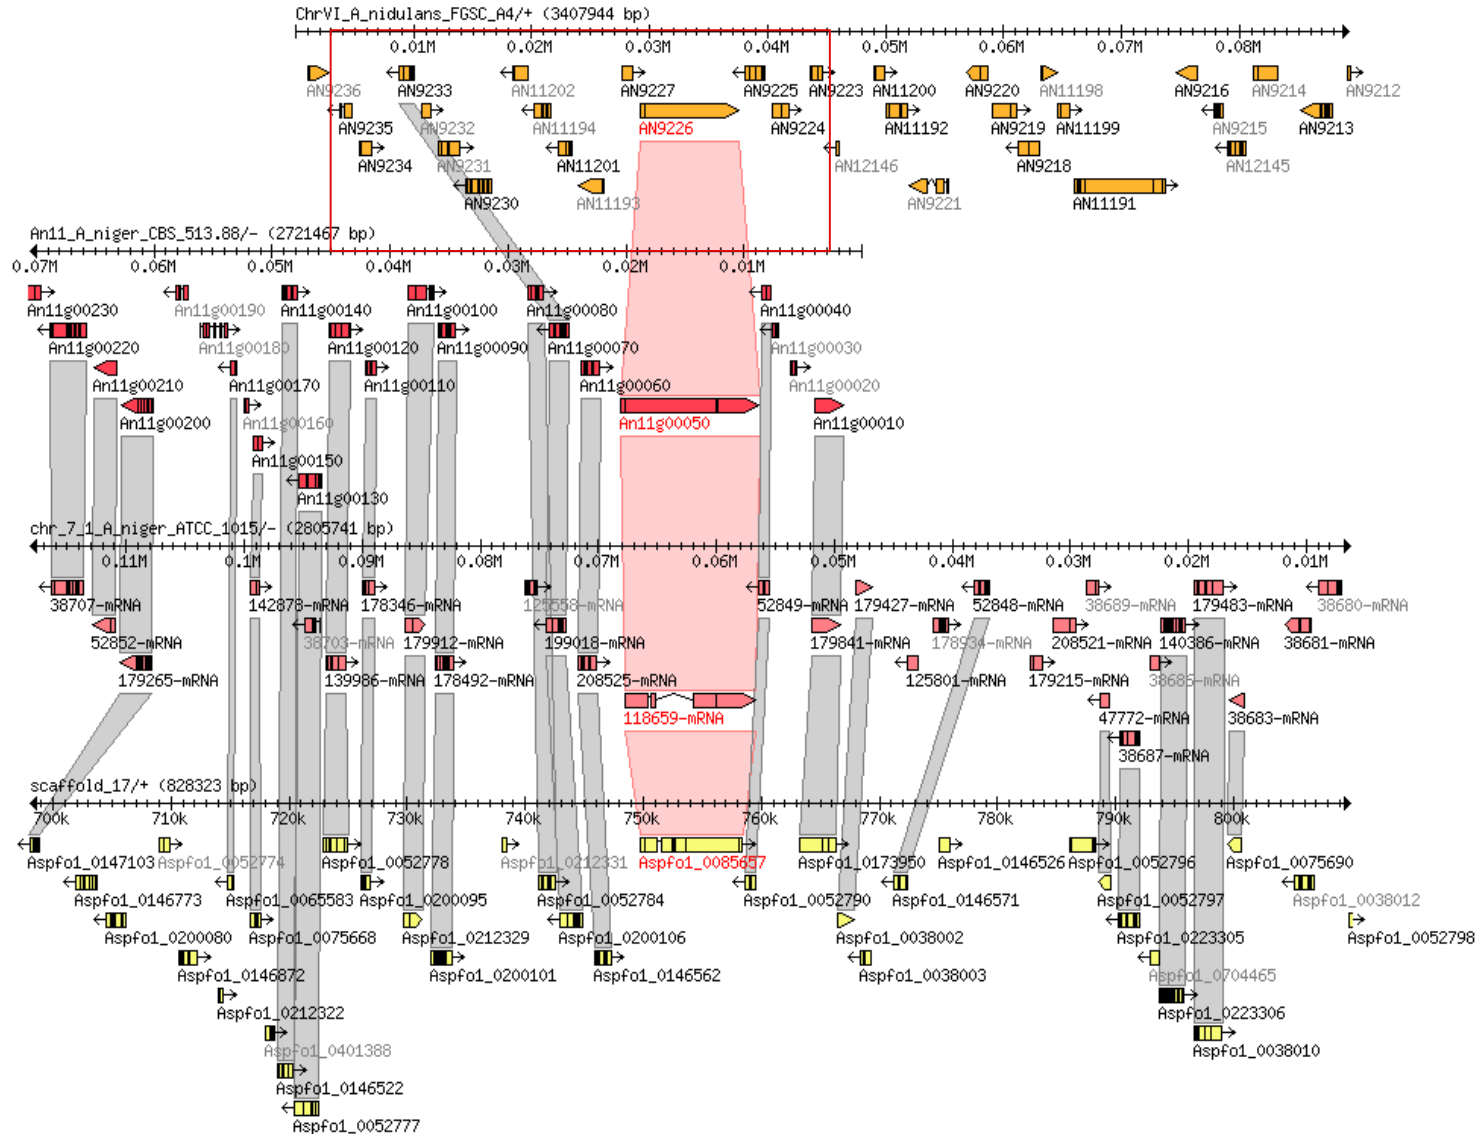

**AN11194 cluster**

| Gene id (SMURF)* | Gene positions | Gene distance (SMURF) | Annotated_gene_function               | AspGD gene name | AspGD manual annotation and notes                    | antiSMASH ID       | Gene ID        |    |
|------------------|----------------|-----------------------|---------------------------------------|-----------------|------------------------------------------------------|--------------------|----------------|----|
| n/a              |                |                       |                                       |                 | Protein of unknown function                          | prot_ID_1014       | AN9220         |    |
| n/a              |                |                       |                                       |                 | Zn(II)2Cys6 transcription factor                     | prot_ID_511        | AN9221         |    |
| n/a              |                |                       |                                       | CYP664A1        | Cytochrome P450                                      | prot_ID_108        | AN11192        |    |
| n/a              |                |                       |                                       |                 | Protein of unknown function                          | prot_ID_329        | AN11200        |    |
| n/a              |                |                       |                                       |                 | Protein of unknown function                          | prot_ID_1129       | AN12146        |    |
| AN9223.3         | 7              | 1736                  | conserved hypothetical protein        |                 | Demethylsterigmatocystin 6-O-methyltransferase       | prot_ID_620        | AN9223         | EP |
| AN9224.3         | 6              | 633                   | conserved hypothetical protein        |                 | Monooxygenase                                        | prot_ID_133        | AN9224         |    |
| AN9225.3         | 5              | 563                   | conserved hypothetical protein        | CYP679A1        | Cytochrome P450                                      | prot_ID_726        | AN9225         |    |
| <b>AN9226.3</b>  | 4              | 1045                  | nonribosomal peptide synthase         |                 | Nonribosomal peptide synthase                        | prot_ID_231        | AN9226         |    |
| AN9227.3         | 3              | 616                   | conserved hypothetical protein        |                 | Dioxygenase                                          | prot_ID_832        | AN9227         |    |
| AN11193.3        | 2              | 429                   | conserved hypothetical protein        |                 | Domain(s) with predicted oxygen transporter activity | prot_ID_698        | AN11193        |    |
| AN11201.3        | 1              | 611                   | conserved hypothetical protein        |                 | Oxidoreductase                                       | prot_ID_933        | AN11201        |    |
| <b>AN11194.3</b> | 0              | 0                     | DMATS type aromatic prenyltransferase |                 | DMATS-type aromatic prenyltransferase                | <b>prot_ID_210</b> | <b>AN11194</b> |    |
| AN11202.3        | -1             | 363                   | DMATS type aromatic prenyltransferase |                 | DMATS-type aromatic prenyltransferase                | prot_ID_438        | AN11202        |    |
| AN9230.3         | -2             | 1866                  | conserved hypothetical protein        |                 | Monooxygenase                                        | prot_ID_18         | AN9230         |    |
| AN9231.3         | -3             | 208                   | conserved hypothetical protein        |                 | UDP-N-acetylmuramate dehydrogenase                   | prot_ID_617        | AN9231         |    |
| AN9232.3         | -4             | 666                   | conserved hypothetical protein        |                 | Oxidoreductase                                       | prot_ID_129        | AN9232         |    |
| AN9233.3         | -5             | 406                   | conserved hypothetical protein        |                 | O-methyltransferase                                  | prot_ID_724        | AN9233         |    |
| AN9234.3         | -6             | 2320                  | conserved hypothetical protein        |                 | Oxidoreductase                                       | prot_ID_227        | AN9234         |    |
| AN9235.3         | -7             | 638                   | conserved hypothetical protein        |                 | Isochorismatase family hydrolase                     | prot_ID_830        | AN9235         | EP |
| AN9236.3         | -8             | 895                   | conserved hypothetical protein        |                 | Zn(II)2Cys6 transcription factor                     | prot_ID_336        | AN9236         |    |
| n/a              |                |                       |                                       |                 | Protein of unknown function                          | n/a                | AN12146        |    |



## AN12331 cluster

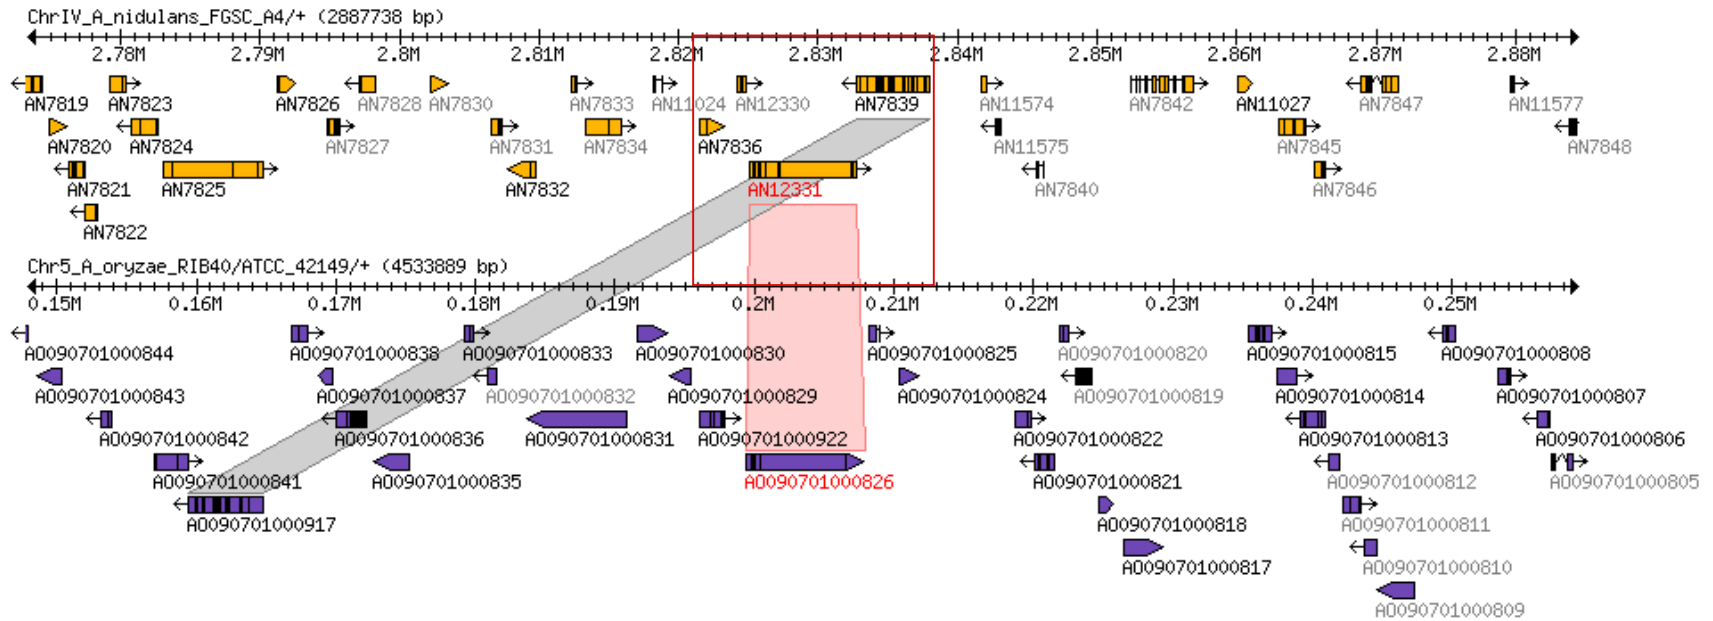

**AN12331 cluster**

| Gene id<br>(SMURF)* | Gene<br>positions | Gene<br>distance (SMURF) | Annotated_gene_function | AspGD<br>gene name | AspGD manual annotation and notes | antiSMASH ID | Gene ID        |     |
|---------------------|-------------------|--------------------------|-------------------------|--------------------|-----------------------------------|--------------|----------------|-----|
| n/a                 |                   |                          |                         |                    | Protein of unknown function       | prot_ID_35   | AN7831         |     |
| n/a                 |                   |                          |                         |                    | choline dehydrogenase             | prot_ID_544  | AN7832         |     |
| n/a                 |                   |                          |                         |                    | Protein of unknown function       | prot_ID_122  | AN7833         |     |
| n/a                 |                   |                          |                         |                    | Protein of unknown function       | prot_ID_631  | AN7834         |     |
| n/a                 |                   |                          |                         |                    | Transmembrane transporter         | prot_ID_337  | AN11024        |     |
| n/a                 |                   |                          |                         |                    | Protein of unknown function       | prot_ID_720  | AN7836         | FA  |
| n/a                 |                   |                          |                         |                    | Protein of unknown function       | prot_ID_996  | AN12330        |     |
| n/a                 |                   |                          |                         |                    | PKS-like enzyme                   | prot_ID_957  | <b>AN12331</b> |     |
| n/a                 |                   |                          |                         |                    | Transmembrane transporter         | prot_ID_392  | AN7839         | ECS |
| n/a                 |                   |                          |                         |                    | Protein of unknown function       | prot_ID_593  | AN11574        |     |
| n/a                 |                   |                          |                         |                    | Protein of unknown function       | prot_ID_175  | AN11575        |     |
| n/a                 |                   |                          |                         |                    | Protein of unknown function       | prot_ID_541  | AN7840         |     |
| n/a                 |                   |                          |                         |                    | Protein of unknown function       | prot_ID_630  | AN7842         |     |

# AN1242 cluster

Highly conserved across numerous species

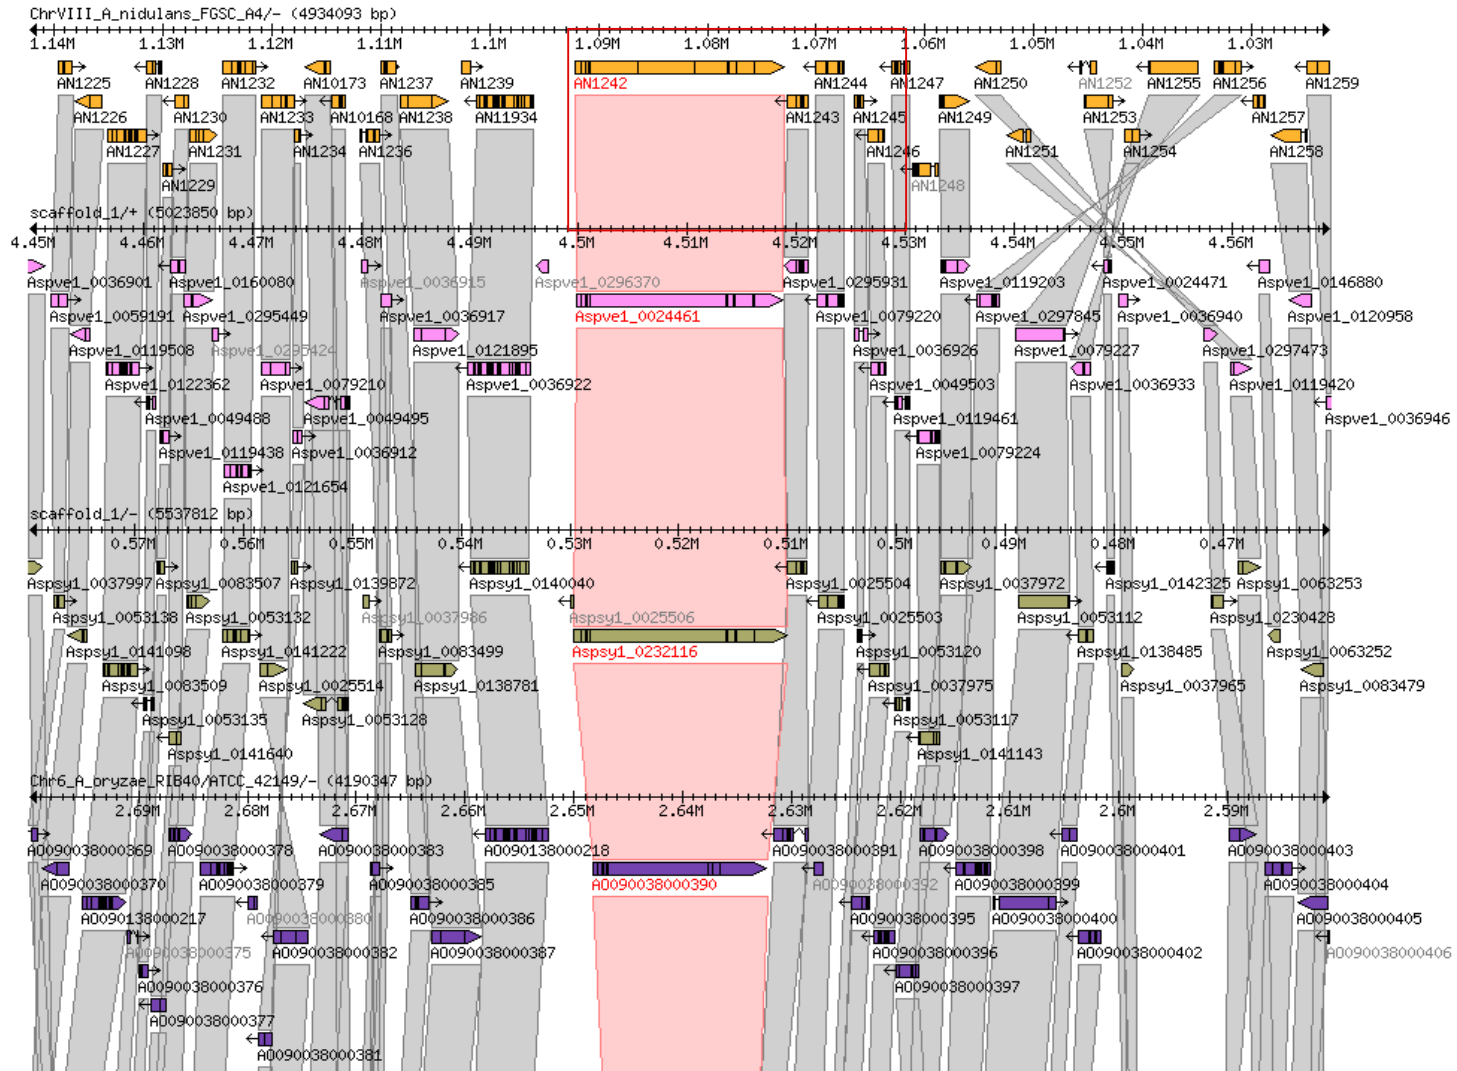

**AN1242 cluster**

| Gene id (SMURF)* | Gene positions | Gene distance | Annotated_gene_function (SMURF)                              | AspGD gene name | AspGD manual annotation and notes    | antiSMASH ID       | Gene ID       |          |
|------------------|----------------|---------------|--------------------------------------------------------------|-----------------|--------------------------------------|--------------------|---------------|----------|
| n/a              |                |               |                                                              |                 | Protein of unknown function          | prot_ID_336        | AN1236        |          |
| n/a              |                |               |                                                              | uvsC            | DNA damage response protein          | prot_ID_791        | AN1237        |          |
| n/a              |                |               |                                                              | nup120          | nuclear pore complex protein         | prot_ID_1268       | AN1238        |          |
| n/a              |                |               |                                                              |                 | Protein of unknown function          | prot_ID_43         | AN1239        |          |
| n/a              |                |               |                                                              |                 | Transmembrane transporter            | prot_ID_1703       | AN11934       |          |
| <b>AN1242.3</b>  | 0              | 0             | nonribosomal peptide synthase conserved hypothetical protein |                 | <b>Nonribosomal peptide synthase</b> | <b>prot_ID_260</b> | <b>AN1242</b> | ECS, IGD |
| AN1243.3         | -1             | 259           |                                                              |                 | <b>Transmembrane transporter</b>     | prot_ID_711        | AN1243        |          |
| n/a              |                |               |                                                              |                 | <b>Protein of unknown function</b>   | prot_ID_1182       | AN1244        |          |
| n/a              |                |               |                                                              |                 | <b>Protein of unknown function</b>   | prot_ID_1637       | AN1245        |          |
| n/a              |                |               |                                                              | pgkA            | <b>phosphoglycerate kinase</b>       | prot_ID_417        | AN1246        |          |
| n/a              |                |               |                                                              |                 | <b>integral membrane protein</b>     | prot_ID_874        | AN1247        | ECS      |
| n/a              |                |               |                                                              |                 | Protein of unknown function          | prot_ID_1350       | AN1248        |          |
| n/a              |                |               |                                                              |                 | Formin binding protein               | prot_ID_121        | AN1249        |          |
| n/a              |                |               |                                                              |                 | Protein of unknown function          | prot_ID_1096       | AN1250        |          |

## AN1594 (PbcR) cluster

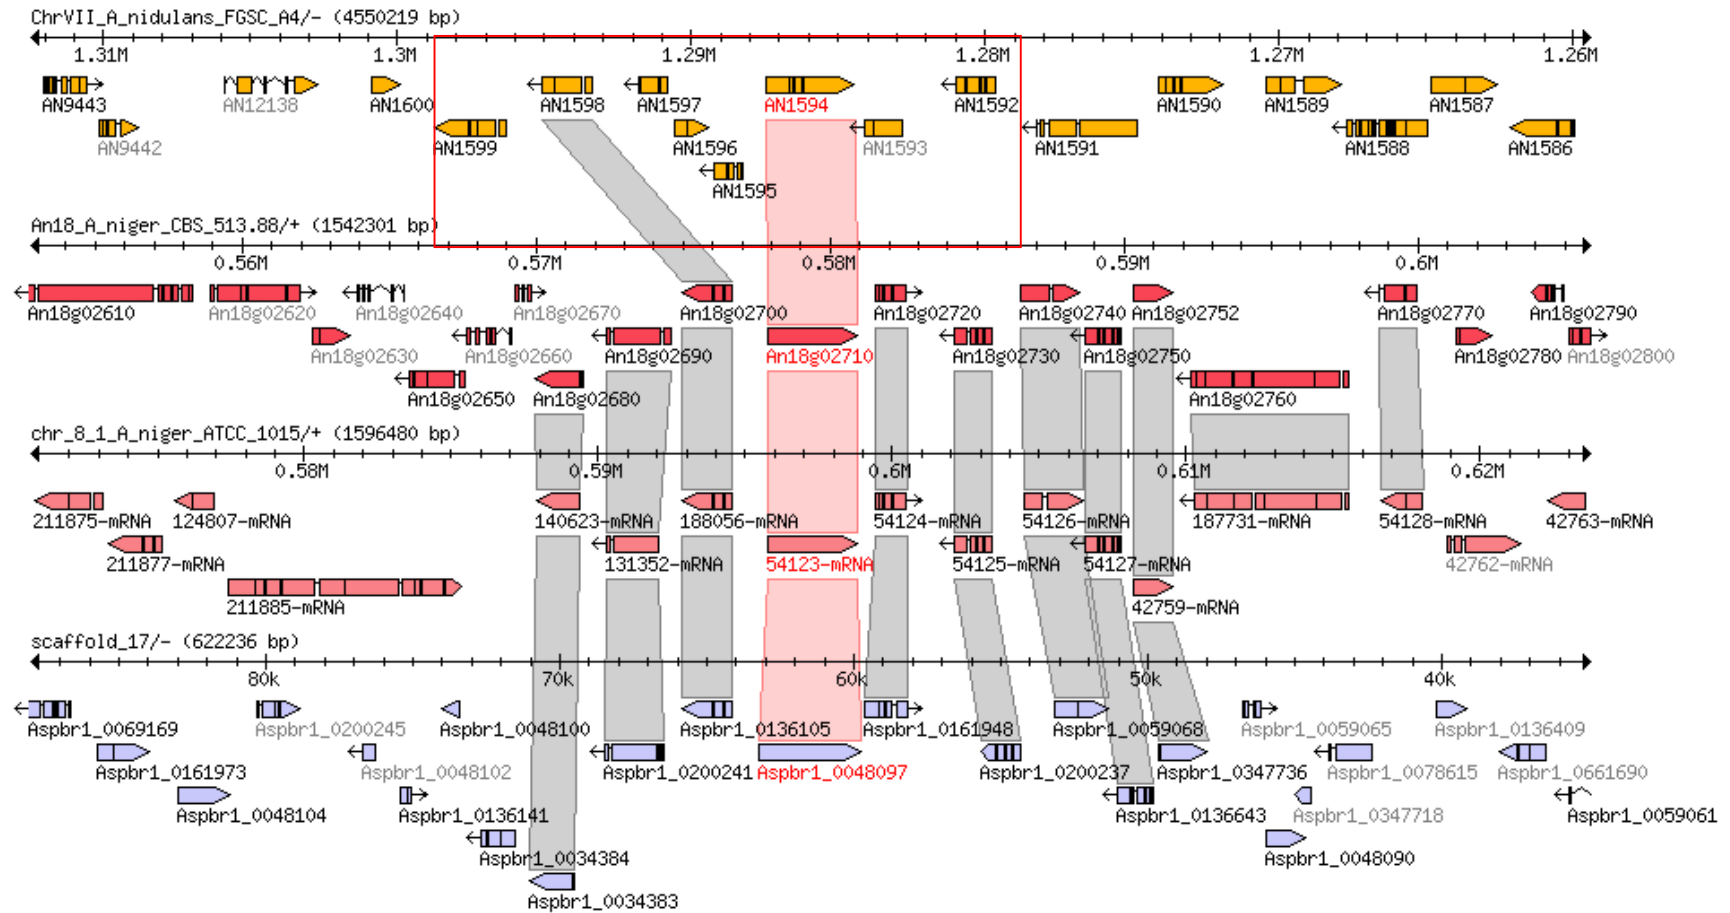

**AN1594 (PbcR)  
cluster**

| Gene id (SMURF)* | Gene positions | Gene distance | Annotated_gene_function (SMURF) | AspGD gene name | AspGD manual annotation and notes                                  | antiSMASH ID | Gene ID       |    |
|------------------|----------------|---------------|---------------------------------|-----------------|--------------------------------------------------------------------|--------------|---------------|----|
| n/a              |                |               |                                 |                 | GGPP-synthase                                                      | n/a          | AN1592        | EP |
| n/a              |                |               |                                 |                 | 3-hydroxy-3-methylglutaryl-coenzyme A (HMG-CoA) reductase isozyyme | n/a          | AN1593        |    |
| n/a              |                |               |                                 |                 | Entkaurene synthase                                                | n/a          | <b>AN1594</b> |    |
| n/a              |                |               |                                 |                 | Elongation factor 1-gamma                                          | n/a          | AN1595        |    |
| n/a              |                |               |                                 |                 | Short-chain dehydrogenase                                          | n/a          | AN1596        |    |
| n/a              |                |               |                                 |                 | Protein of unknown function                                        | n/a          | AN1597        |    |
| n/a              |                |               |                                 | CYP503B1        | Cytochrome P450 Zn(II)(2)Cys(6)-type                               | n/a          | AN1598        |    |
| n/a              |                |               |                                 | pbcR            | transcription factor                                               | n/a          | AN1599        | EP |

## AN1680 cluster

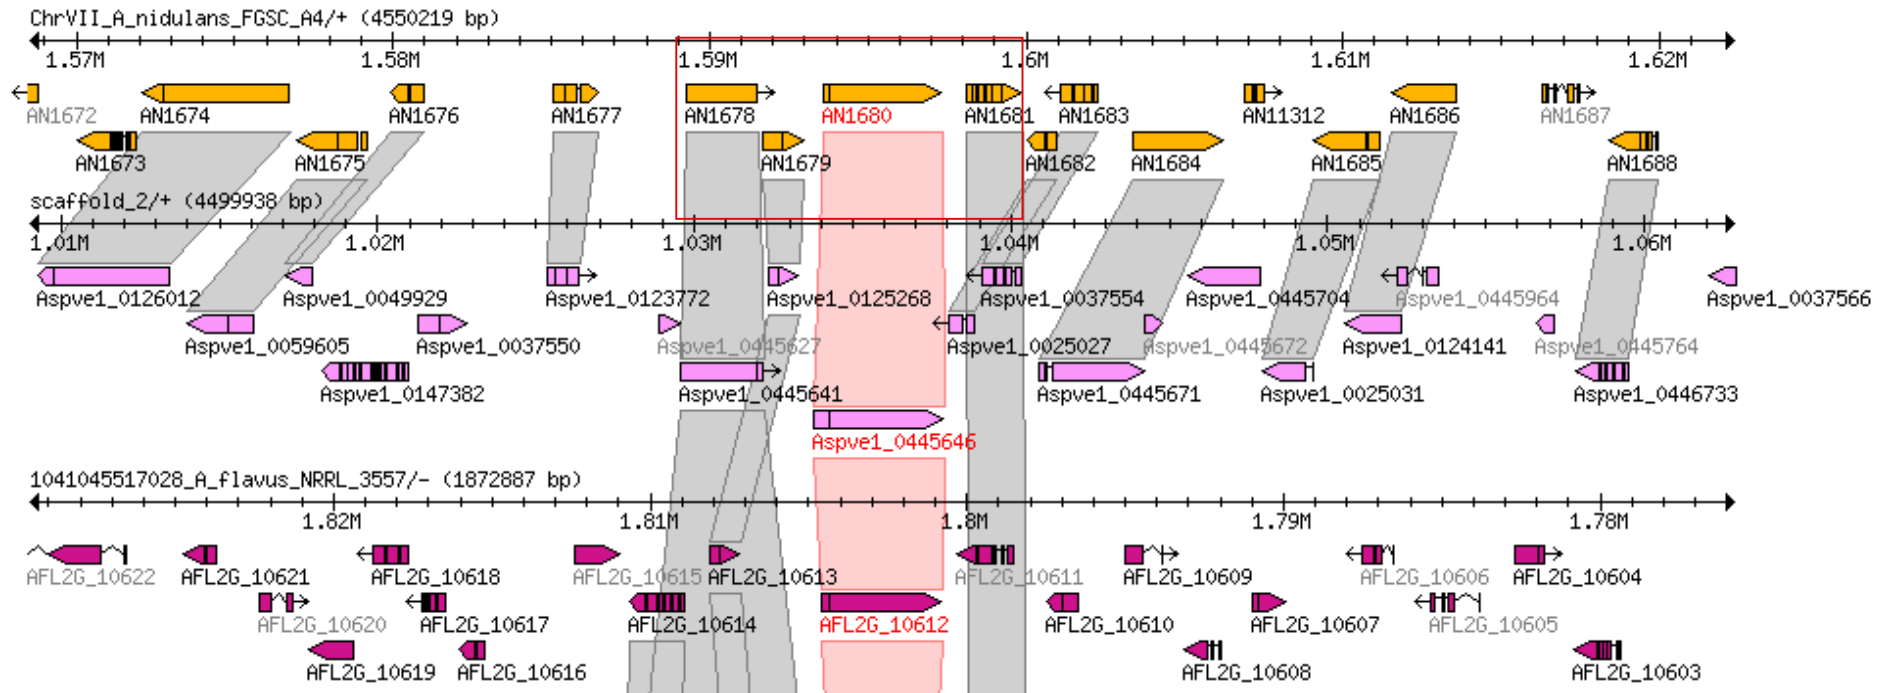

### AN1680 Cluster

| Gene id (SMURF)* | Gene positions | Gene distance | Annotated_gene_function (SMURF) | AspGD gene name | AspGD manual annotation and notes                                            | antiSMASH ID       | Gene ID       |     |
|------------------|----------------|---------------|---------------------------------|-----------------|------------------------------------------------------------------------------|--------------------|---------------|-----|
| n/a              |                |               |                                 |                 | Domain(s) with predicted DNA binding activity and intracellular localization | prot_ID_478        | AN1674        |     |
| n/a              |                |               |                                 |                 | Lysophospholipase (phospholipase B)                                          | prot_ID_1290       | AN1675        |     |
| n/a              |                |               |                                 |                 | Oxidoreductase                                                               | prot_ID_619        | AN1676        |     |
| AN1677.3         | 3              | 2761          | conserved hypothetical protein  |                 | Short-chain dehydrogenase                                                    | prot_ID_1433       | AN1677        |     |
| AN1678.3         | 2              | 398           | conserved hypothetical protein  |                 | Transcription factor                                                         | prot_ID_764        | AN1678        | ECS |
| AN1679.3         | 1              | 609           | conserved hypothetical protein  |                 | Protein of unknown function                                                  | prot_ID_95         | AN1679        |     |
| <b>AN1680.3</b>  | 0              | 0             | NRPS-like enzyme                |                 | Nonribosomal peptide synthase (NRPS)-like enzyme                             | <b>prot_ID_331</b> | <b>AN1680</b> |     |
| AN1681.3         | -1             | 735           | conserved hypothetical protein  |                 | Transmembrane transporter                                                    | prot_ID_1145       | AN1681        | ECS |
| AN1682.3         | -2             | 151           | hypothetical protein            |                 | Protein of unknown function                                                  | prot_ID_476        | AN1682        |     |
| AN1683.3         | -3             | 192           | conserved hypothetical protein  |                 | oligosaccharyltransferase delta subunit                                      | prot_ID_1287       | AN1683        |     |
| AN1684.3         | -4             | 840           | conserved hypothetical protein  |                 | Protein of unknown function                                                  | prot_ID_618        | AN1684        |     |
| AN11312.3        | -5             | 853           | conserved hypothetical protein  |                 | Protein of unknown function                                                  | prot_ID_964        | AN11312       |     |
| AN1685.3         | -6             | 1871          | 3-phytase B precursor           |                 | phytase                                                                      | prot_ID_1432       | AN1685        |     |
| AN1686.3         | -7             | 903           | conserved hypothetical protein  |                 | Transcription factor                                                         | prot_ID_762        | AN1686        |     |
| AN1687.3         | -8             | 2110          | hypothetical protein            |                 | Oxidoreductase                                                               | prot_ID_93         | AN1687        |     |
| AN1688.3         | -9             | 931           | conserved hypothetical protein  |                 | Protein of unknown function                                                  | n/a                | AN1688        |     |
| AN1689.3         | -10            | 3063          | hypothetical protein            |                 | Oxidoreductase                                                               | n/a                | AN1689        |     |
| AN1690.3         | -11            | 589           | hypothetical protein            |                 | Protein of unknown function                                                  | n/a                | AN1690        |     |
| AN1691.3         | -12            | 955           | conserved hypothetical protein  |                 | Transmembrane transporter                                                    | n/a                | AN1691        |     |



## AN1784 cluster

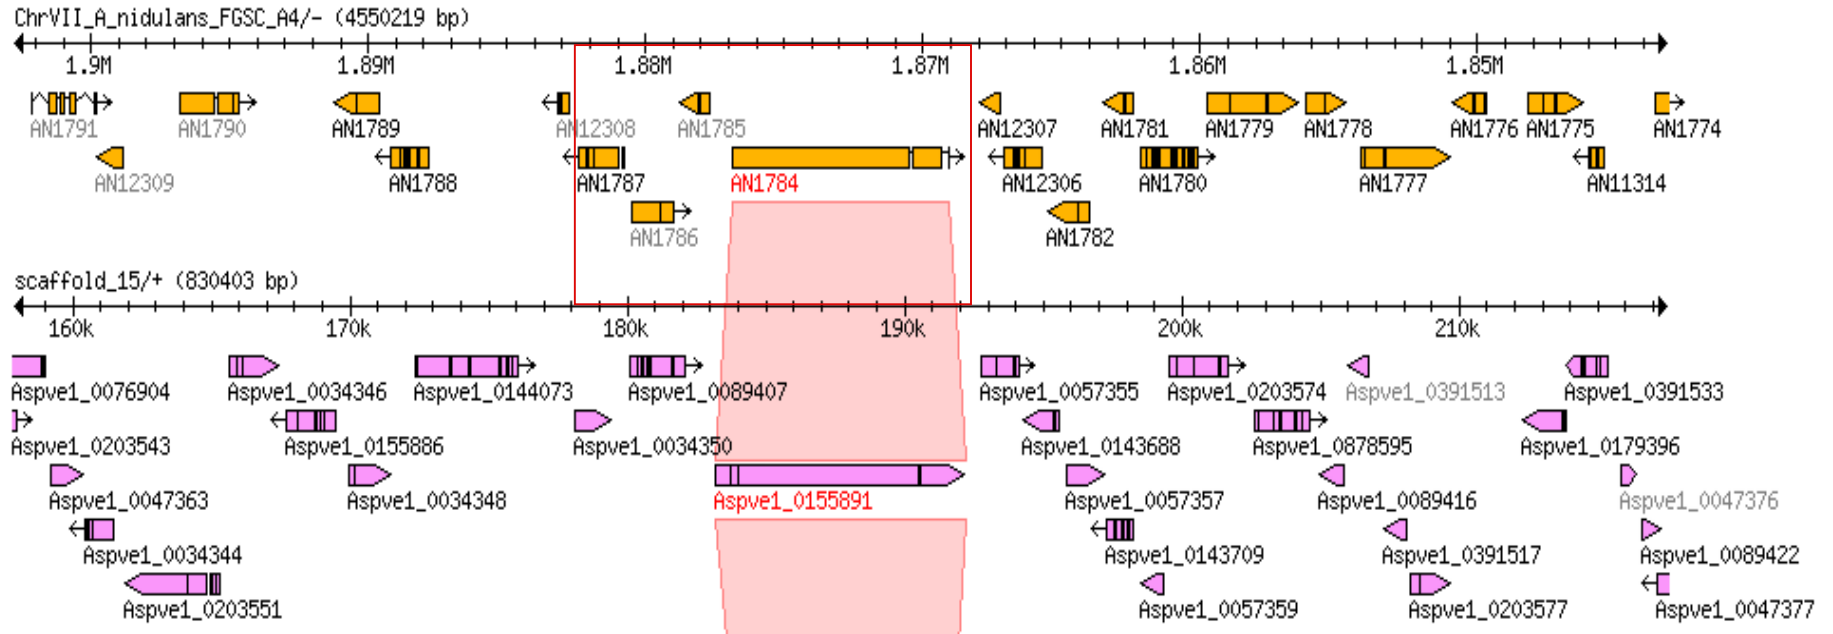

**AN1784 cluster**

| Gene id (SMURF)* | Gene positions | Gene distance | Annotated_gene_function (SMURF) | AspGD gene name | AspGD manual annotation and notes         | antiSMASH ID       | Gene ID          |
|------------------|----------------|---------------|---------------------------------|-----------------|-------------------------------------------|--------------------|------------------|
| n/a              |                |               |                                 |                 | U1 snRNP splicing complex subunit         | prot_ID_856        | AN1776           |
| n/a              |                |               |                                 |                 | PHD finger domain protein                 | prot_ID_180        | AN1777           |
| AN1778.3         | 6              | 242           | conserved hypothetical protein  | pantoB          | Ketopentolate hydroxymethyl transferase   | prot_ID_1000       | AN1778           |
| AN1779.3         | 5              | 399           | conserved hypothetical protein  |                 | Protein kinase                            | prot_ID_326        | AN1779           |
| AN1780.3         | 4              | 520           | conserved hypothetical protein  |                 | Aminopeptidase                            | prot_ID_565        | AN1780           |
| AN1781.3         | 3              | 569           | conserved hypothetical protein  |                 | Oxidoreductase                            | prot_ID_1381       | AN1781           |
| AN1782.3         | 2              | 653           | conserved hypothetical protein  |                 | Hydrolase                                 | prot_ID_713        | AN1782           |
| n/a              |                |               |                                 |                 | Oxidoreductase                            | prot_ID_1537       | AN12306          |
| AN1783.3         | 1              | 690           | conserved hypothetical protein  |                 | Protein of unknown function               | prot_ID_1512       | AN12307          |
| <b>AN1784.3</b>  | 0              | 0             | polyketide synthase             |                 | <b>Polyketide synthase</b>                | <b>prot_ID_855</b> | <b>AN1784</b> EP |
| AN1785.3         | -1             | 793           | conserved hypothetical protein  |                 | <b>Protein of unknown function</b>        | prot_ID_178        | AN1785           |
| AN1786.3         | -2             | 127           | conserved hypothetical protein  |                 | <b>Monooxygenase</b>                      | prot_ID_998        | AN1786           |
| AN1787.3         | -3             | 272           | conserved hypothetical protein  |                 | <b>UDP-N-acetylmuramate dehydrogenase</b> | prot_ID_323        | AN1787 EP        |
| n/a              |                |               |                                 |                 | Protein of unknown function               | prot_ID_1548       | AN12308          |
| n/a              |                |               |                                 |                 | Metal ion transmembrane transporter       | prot_ID_1139       | AN1788           |
| n/a              |                |               |                                 |                 | Protein serine/threonine kinase           | prot_ID_469        | AN1789           |
| n/a              |                |               |                                 |                 | Protein of unknown function               | prot_ID_711        | AN1790           |

## AN1793 cluster

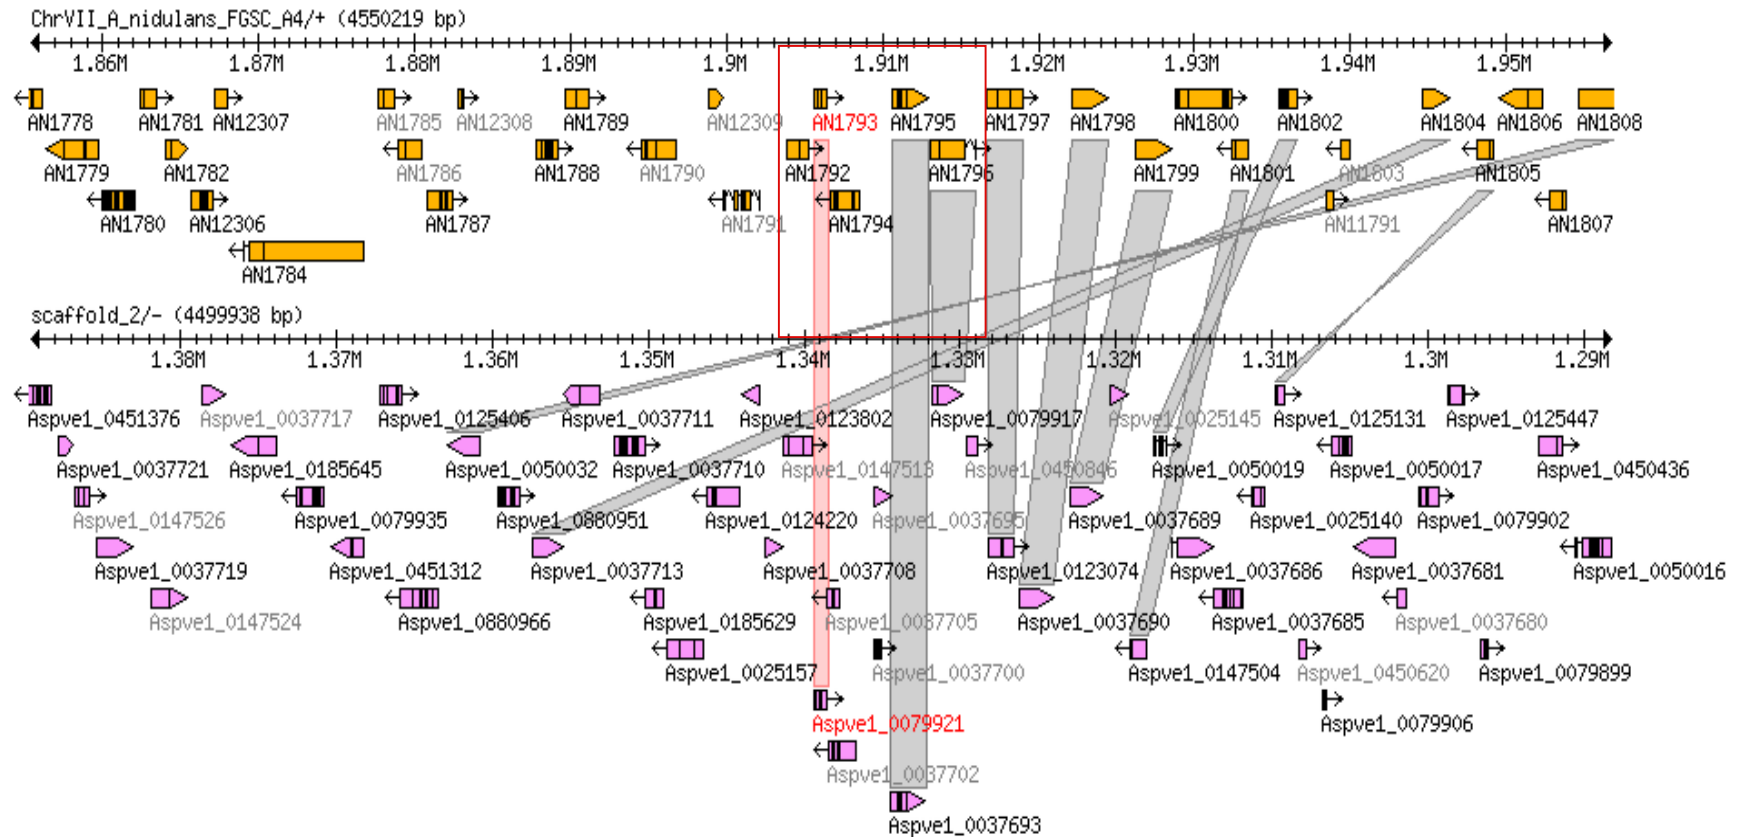

**AN1793 cluster**

| Gene id (SMURF)* | Gene positions | Gene distance | Annotated_gene_function (SMURF) | AspGD gene name | AspGD manual annotation and notes | antiSMASH ID | Gene ID       |     |
|------------------|----------------|---------------|---------------------------------|-----------------|-----------------------------------|--------------|---------------|-----|
| n/a              |                |               |                                 |                 | Protein of unknown function       | prot_ID_711  | AN1790        |     |
| n/a              |                |               |                                 |                 | Protein of unknown function       | prot_ID_1520 | AN12309       |     |
| n/a              |                |               |                                 |                 | Protein of unknown function       | prot_ID_38   | AN1791        |     |
| n/a              |                |               |                                 |                 | <b>Hydrolase</b>                  | prot_ID_853  | AN1792        | FA  |
| n/a              |                |               |                                 |                 | <b>Terpene synthase</b>           | prot_ID_176  | <b>AN1793</b> |     |
| n/a              |                |               |                                 | <b>CYP682D1</b> | <b>Cytochrome P450</b>            | prot_ID_997  | AN1794        |     |
| n/a              |                |               |                                 |                 | <b>Transmembrane transporter</b>  | prot_ID_321  | AN1795        |     |
| n/a              |                |               |                                 |                 | <b>DNA repair protein</b>         | prot_ID_1137 | AN1796        | ECS |
| n/a              |                |               |                                 |                 | Sugar transporter                 | n/a          | AN1797        |     |
| n/a              |                |               |                                 |                 | Sterol esterase                   | n/a          | AN1798        |     |
| n/a              |                |               |                                 |                 | Triglyceride lipase               | n/a          | AN1799        |     |
| n/a              |                |               |                                 |                 | Transmembrane histidine kinase    | n/a          | AN1800        |     |
| n/a              |                |               |                                 |                 | Protein of unknown function       | n/a          | AN1801        |     |
| n/a              |                |               |                                 |                 | Small nuclear ribonucleoprotein   | n/a          | AN1802        |     |

## AN2064 cluster

Possible false positive, functional annotations don't make sense

No manual prediction made

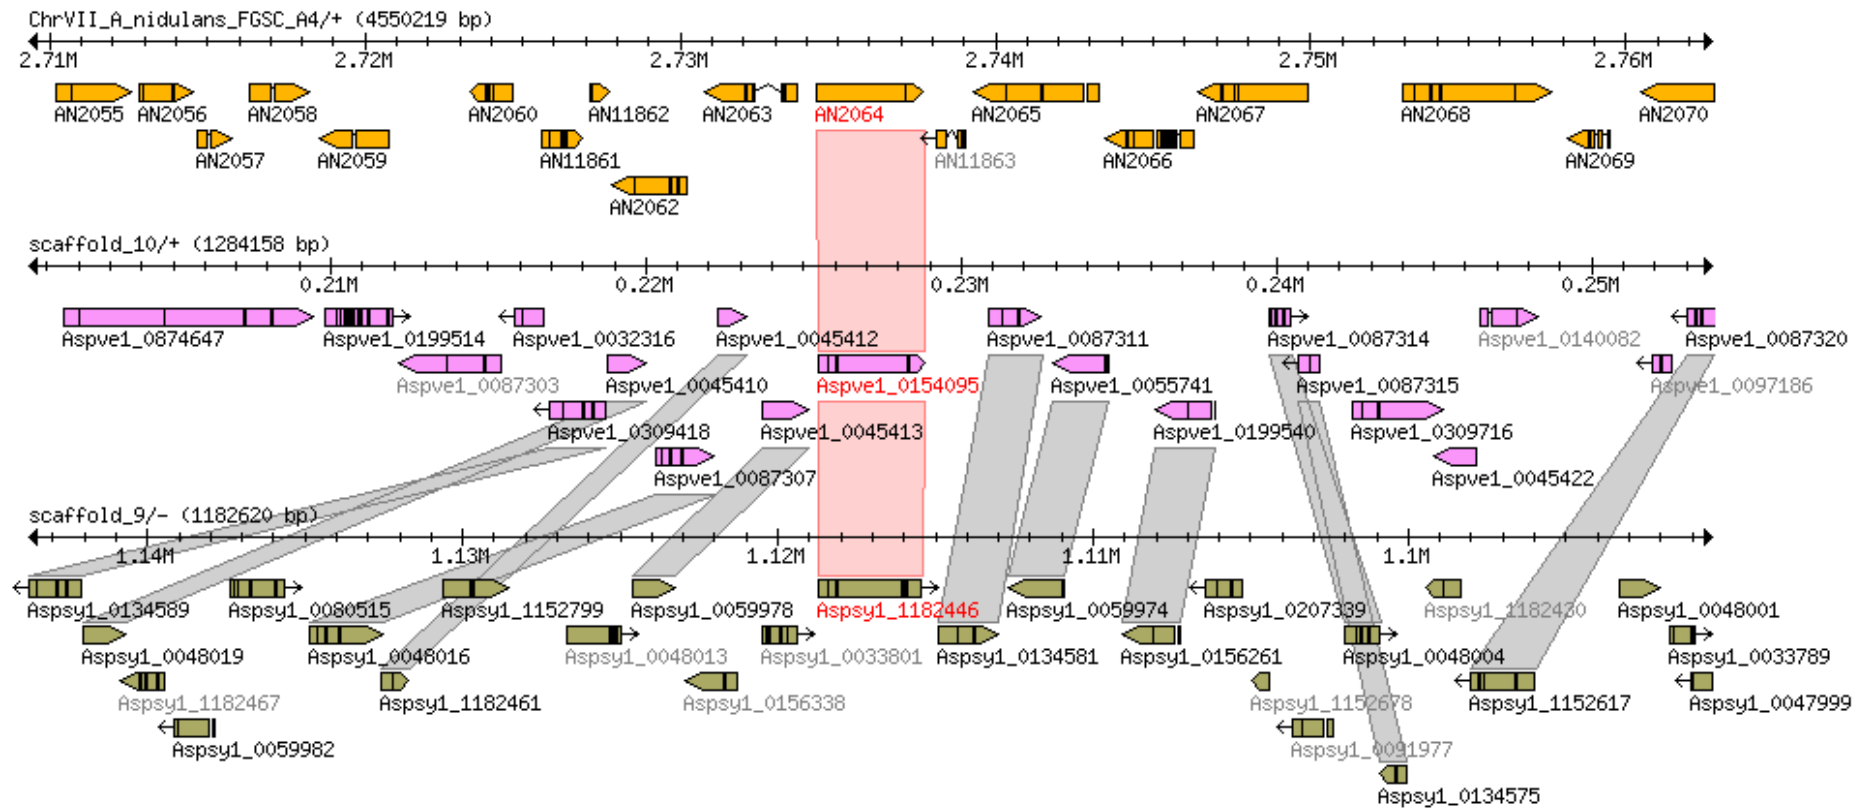

**AN2064 cluster**

| Gene id (SMURF)* | Gene positions | Gene distance | Annotated_gene_function (SMURF)      | AspGD gene name | AspGD manual annotation and notes                  | antiSMASH ID | Gene ID |
|------------------|----------------|---------------|--------------------------------------|-----------------|----------------------------------------------------|--------------|---------|
| n/a              |                |               |                                      |                 | 50S ribosomal protein L12                          | prot_ID_86   | AN2057  |
| n/a              |                |               |                                      |                 | Protein of unknown function                        | prot_ID_908  | AN2058  |
| n/a              |                |               |                                      | velC            | Velvet family protein                              | prot_ID_232  | AN2059  |
| n/a              |                |               |                                      | abxA            | Exo-arabinanase                                    | prot_ID_468  | AN2060  |
| n/a              |                |               |                                      |                 | oxidoreductase, transferring acyl groups           | prot_ID_1485 | AN11861 |
| AN2061.3         | 3              | 26            | conserved hypothetical protein       |                 | Deleted ORF                                        |              |         |
| n/a              |                |               |                                      |                 | Ortholog(s) have TRC complex, nucleus localization | prot_ID_1547 | AN11862 |
| AN2062.3         | 2              | 442           | hypothetical protein similar to bipA | bipA            | ER-resident chaperone of the HSP70 family          | prot_ID_610  | AN2062  |

## AN2924 cluster

Possible false positive prediction

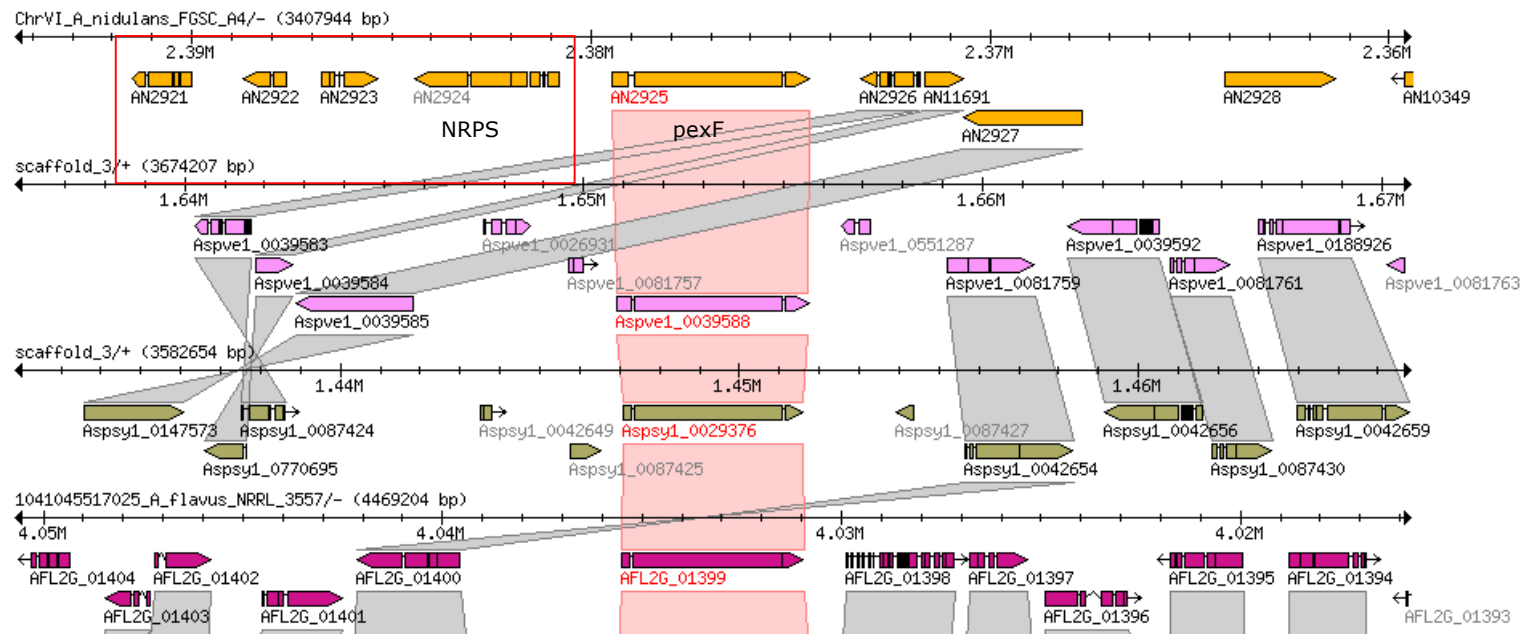

**AN2924 cluster**

| Gene id (SMURF)* | Gene positions | Gene distance | Annotated_gene_function (SMURF) | AspGD gene name | AspGD manual annotation and notes                                  | antiSMASH ID       | Gene ID       |    |
|------------------|----------------|---------------|---------------------------------|-----------------|--------------------------------------------------------------------|--------------------|---------------|----|
| n/a              |                |               |                                 |                 | Similar to 26S proteasome regulatory subunit                       | prot_ID_127        | AN2917        |    |
| n/a              |                |               |                                 | cct4            | Chaperonin complex component C2H2 zinc-finger transcription factor | prot_ID_722        | AN2918        |    |
| n/a              |                |               |                                 | sltA            |                                                                    | prot_ID_228        | AN2919        |    |
| n/a              |                |               |                                 | AN2920          | Possible pseudogene                                                |                    |               |    |
| AN2921.3         | 3              | 544           | conserved hypothetical protein  |                 | Domain(s) with predicted nucleotide binding activity               | prot_ID_1008       | AN2921        | EP |
| AN2922.3         | 2              | 1096          | conserved hypothetical protein  |                 | Protein of unknown function                                        | prot_ID_504        | AN2922        |    |
| AN2923.3         | 1              | 951           | conserved hypothetical protein  |                 | Protein of unknown function                                        | prot_ID_16         | AN2923        |    |
| <b>AN2924.3</b>  | 0              | 0             | NRPS-like enzyme                |                 | NRPS-like enzyme                                                   | <b>prot_ID_611</b> | <b>AN2924</b> | EP |
| AN2925.3         | -1             | 1615          | conserved hypothetical protein  | pexF            | peroxisomal import protein                                         | prot_ID_124        | AN2925        |    |
| n/a              |                |               |                                 | nsa2            | 60S ribosomal protein                                              | prot_ID_719        | AN2926        |    |
| n/a              |                |               |                                 |                 | Protein serine/threonine kinase                                    | prot_ID_224        | AN2927        |    |
| n/a              |                |               |                                 |                 | Protein of unknown function                                        | prot_ID_1107       | AN11691       |    |
| n/a              |                |               |                                 |                 | Protein of unknown function                                        | prot_ID_827        | AN2928        |    |



## AN3252 cluster

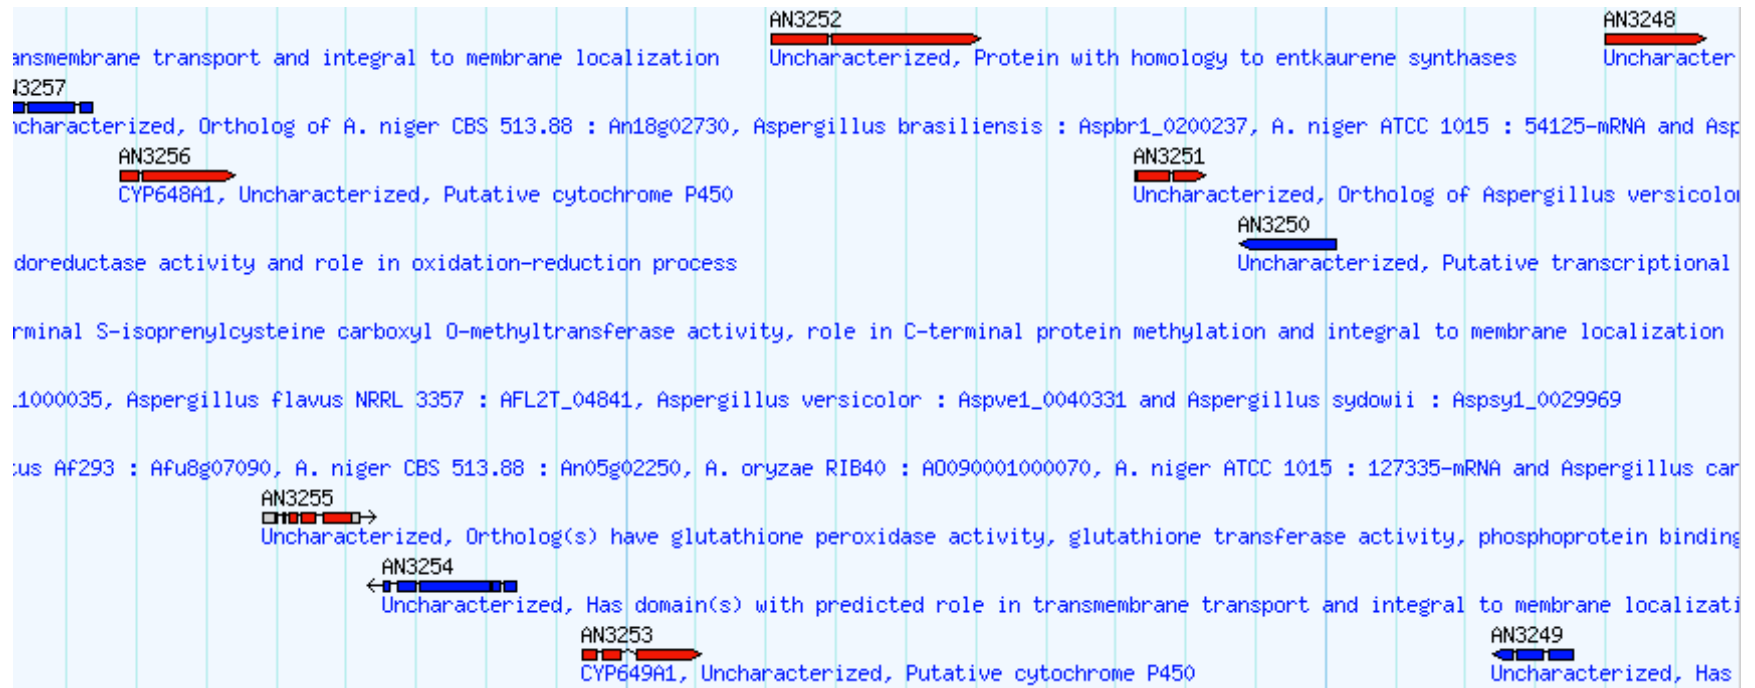

**AN3252 cluster**

| Gene id (SMURF)* | Gene positions | Gene distance | Annotated_gene_function (SMURF) | AspGD gene name | AspGD manual annotation and notes | antiSMASH ID | Gene ID       |    |
|------------------|----------------|---------------|---------------------------------|-----------------|-----------------------------------|--------------|---------------|----|
| n/a              |                |               |                                 |                 | Protein of unknown function       | n/a          | AN3257        | EP |
| n/a              |                |               |                                 | CYP648A1        | cytochrome P450                   | n/a          | AN3256        |    |
| n/a              |                |               |                                 |                 | glutathione peroxidase            | n/a          | AN3255        |    |
| n/a              |                |               |                                 |                 | transmembrane transporter         | n/a          | AN3254        |    |
| n/a              |                |               |                                 | CYP649A1        | cytochrome P450                   | n/a          | AN3253        |    |
| n/a              |                |               |                                 |                 | Entkaurene synthase               | n/a          | <b>AN3252</b> | EP |



## AN3273 cluster

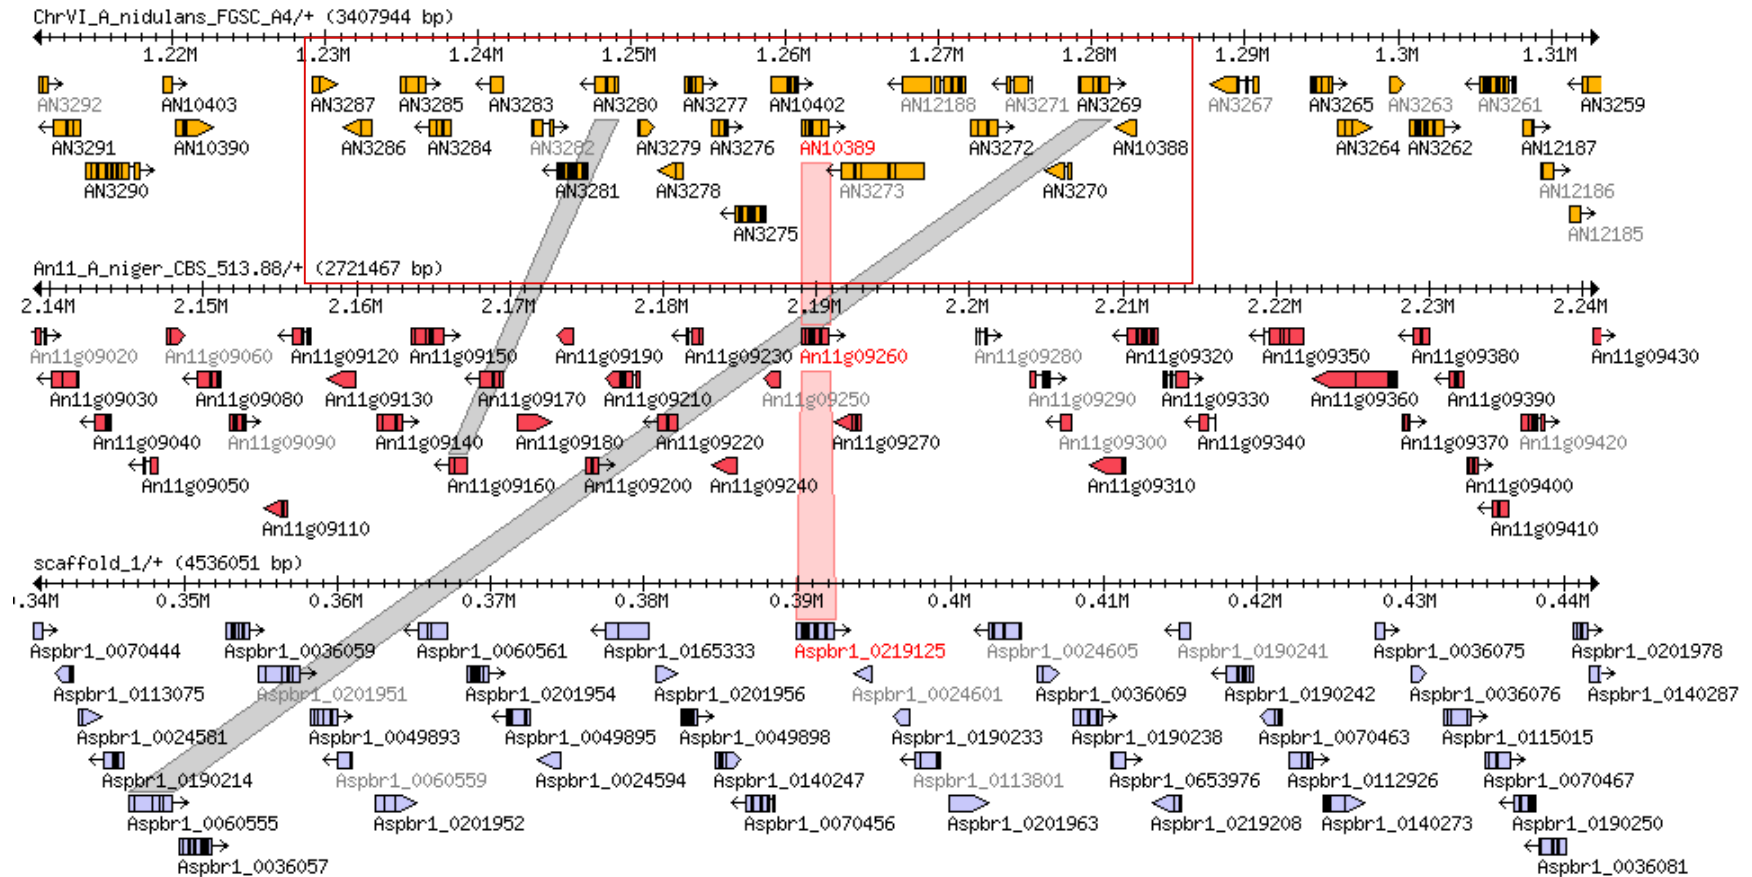

**AN3273 cluster**

| Gene id (SMURF)* | Gene positions | Gene distance | Annotated_gene_function (SMURF) | AspGD gene name | AspGD manual annotation and notes  | antiSMASH ID | Gene ID       |     |
|------------------|----------------|---------------|---------------------------------|-----------------|------------------------------------|--------------|---------------|-----|
| n/a              |                |               |                                 |                 | Protein of unknown function        | prot_ID_773  | AN3267        |     |
| n/a              |                |               |                                 |                 | UDP-N-acetylmuramate dehydrogenase | prot_ID_420  | AN10388       | IGD |
| n/a              |                |               |                                 | AN10387         | possible psuedogene                | n/a          |               |     |
| n/a              |                |               |                                 |                 | Zn(II)2Cys6 transcription factor   | prot_ID_882  | AN3269        |     |
| n/a              |                |               |                                 |                 | Transmembrane transporter          | prot_ID_1066 | AN3270        |     |
| n/a              |                |               |                                 |                 | Protein of unknown function        | prot_ID_556  | AN3271        |     |
| n/a              |                |               |                                 | CYP667A1        | Cytochrome P450                    | prot_ID_71   | AN3272        |     |
| n/a              |                |               |                                 |                 | Transferase                        | prot_ID_1165 | AN12188       |     |
| n/a              |                |               |                                 |                 | Polketide synthase                 | prot_ID_666  | <b>AN3273</b> |     |
| n/a              |                |               |                                 | CYP654A1        | Cytochrome P450                    | prot_ID_1028 | AN10389       |     |
| n/a              |                |               |                                 |                 | UDP-N-acetylmuramate dehydrogenase | prot_ID_523  | AN10402       |     |
| n/a              |                |               |                                 | CYP567E1        | Cytochrome P450                    | prot_ID_771  | AN3275        |     |
| n/a              |                |               |                                 |                 | Type II fatty acid synthase        | prot_ID_278  | AN3276        |     |
| n/a              |                |               |                                 |                 | Terpene synthase                   | prot_ID_879  | AN3277        |     |
| n/a              |                |               |                                 |                 | Protein of unknown function        | prot_ID_387  | AN3278        |     |
| n/a              |                |               |                                 |                 | Oxidoreductase                     | prot_ID_994  | AN3279        |     |
| n/a              |                |               |                                 |                 | Zn(II)2Cys6 transcription factor   | prot_ID_70   | AN3280        |     |
| n/a              |                |               |                                 | CYP567D1        | Cytochrome P450                    | prot_ID_665  | AN3281        |     |
| n/a              |                |               |                                 |                 | Protein of unknown function        | prot_ID_177  | AN3282        |     |
| n/a              |                |               |                                 |                 | Protein of unknown function        | prot_ID_770  | AN3283        |     |
| n/a              |                |               |                                 |                 | Protein of unknown function        | prot_ID_277  | AN3284        |     |
| n/a              |                |               |                                 |                 | Protein of unknown function        | prot_ID_877  | AN3285        |     |
| n/a              |                |               |                                 |                 | Protein of unknown function        | n/a          | AN3286        |     |
| n/a              |                |               |                                 |                 | Transmembrane transporter          | n/a          | AN3287        | IGD |

## AN3612 cluster

overlaps AN10430 cluster

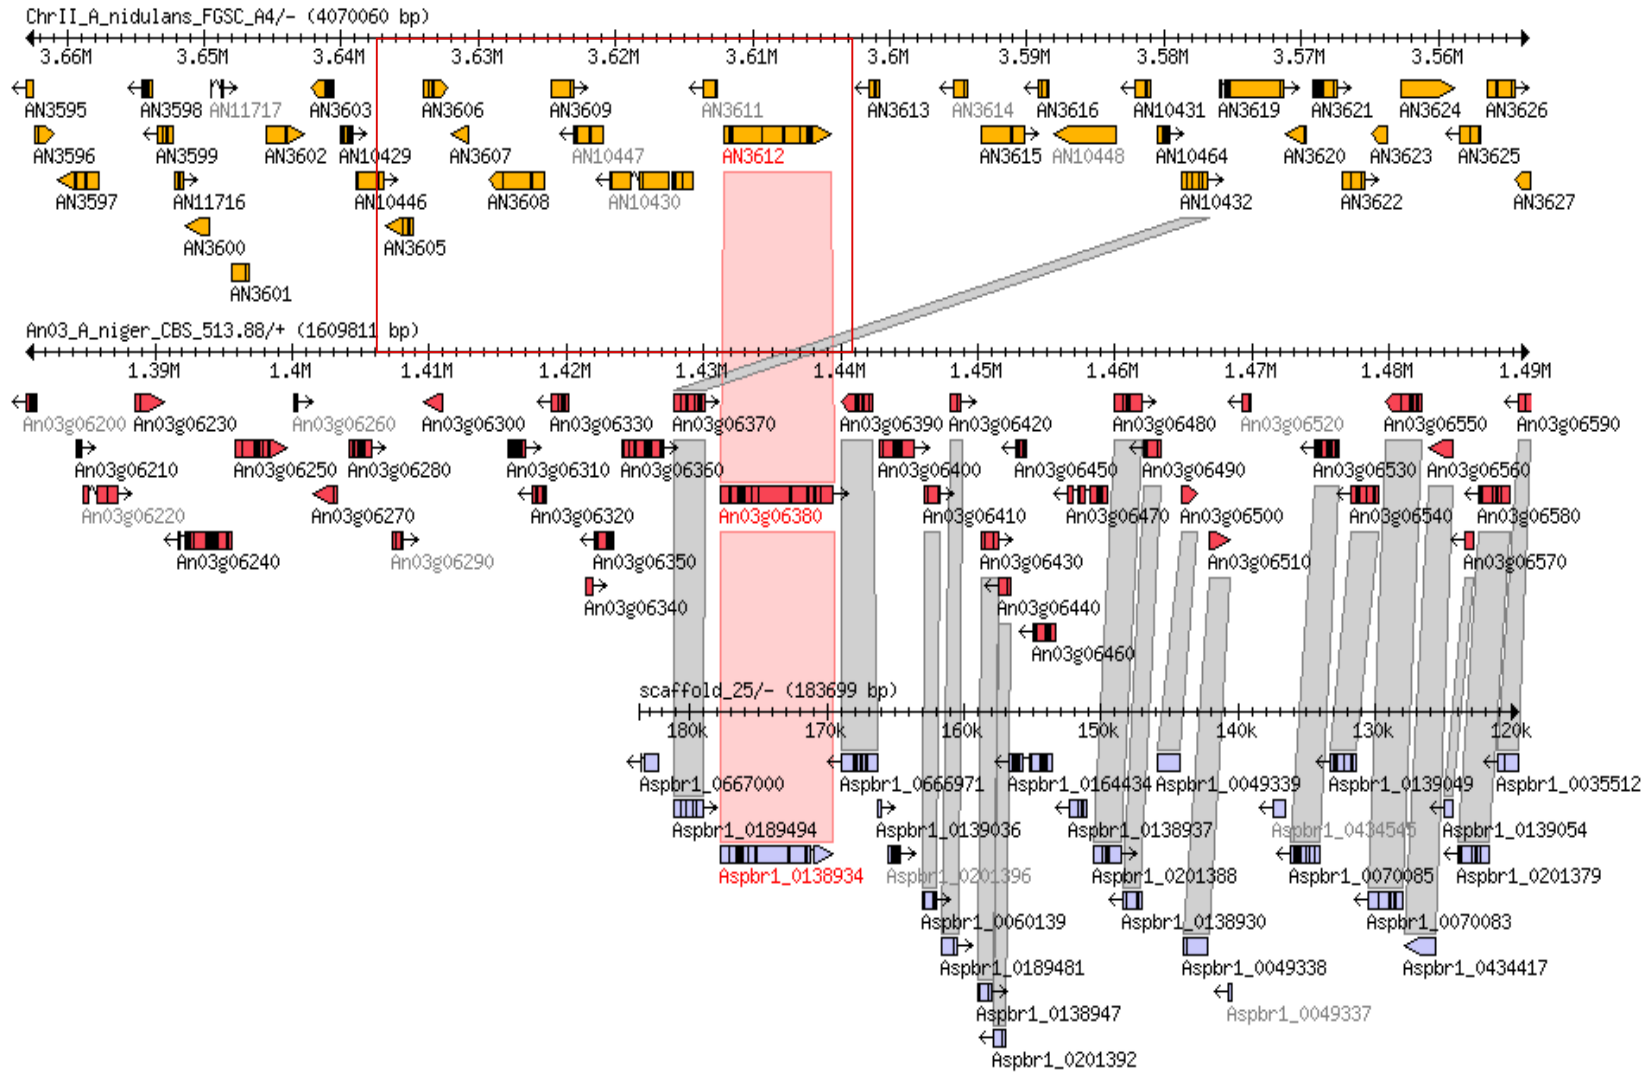

**AN3612 cluster (overlaps AN10430 cluster)**

| Gene id (SMURF)* | Gene positions | Gene distance | Annotated_gene_function (SMURF)                              | AspGD gene name | AspGD manual annotation and notes                 | antiSMASH ID       | Gene ID       |         |
|------------------|----------------|---------------|--------------------------------------------------------------|-----------------|---------------------------------------------------|--------------------|---------------|---------|
| n/a              |                |               |                                                              |                 | Phosphoserine phosphatase                         | prot_ID_665        | AN10429       |         |
| n/a              |                |               |                                                              |                 | Phosphoprotein phosphatase                        | prot_ID_59         | AN10446       |         |
| n/a              |                |               |                                                              |                 | Oxidoreductase                                    | prot_ID_906        | AN3605        | FA      |
| n/a              |                |               |                                                              |                 | Protein of unknown function                       | prot_ID_296        | AN3606        |         |
| n/a              |                |               |                                                              | lreB            | Znc-finger transcription factor                   | prot_ID_1042       | AN3607        |         |
| AN3608.3         | 5              | 506           | hypothetical protein similar to ABC transporter protein AtrC | atrC            | ABC transporter                                   | prot_ID_423        | AN3608        |         |
| AN3609.3         | 4              | 25            | conserved hypothetical protein                               |                 | Cytochrome P450                                   | prot_ID_1168       | AN3609        |         |
| AN10447.3        | 3              | 615           | conserved hypothetical protein                               |                 | Acyl transferase                                  | prot_ID_789        | AN10447       |         |
| AN10430.3        | 2              | 773           | polyketide synthase                                          |                 | Polyketide synthase                               | prot_ID_886        | AN10430       |         |
| AN3611.3         | 1              | 425           | conserved hypothetical protein                               |                 | Protein of unknown function                       | prot_ID_769        | AN3611        |         |
| <b>AN3612.3</b>  | 0              | 0             | polyketide synthase                                          |                 | Polyketide synthase                               | <b>prot_ID_164</b> | <b>AN3612</b> | ECS, FA |
| n/a              |                |               |                                                              | xlnA            | Endo-1,4-beta-xylanase                            | prot_ID_903        | AN3613        |         |
| n/a              |                |               |                                                              |                 | Protein of unknown function                       | prot_ID_292        | AN3614        |         |
| n/a              |                |               |                                                              |                 | Nucleoside-triphosphatase                         | prot_ID_1039       | AN3615        |         |
| n/a              |                |               |                                                              |                 | Oxidoreductase                                    | prot_ID_421        | AN3616        |         |
| n/a              |                |               |                                                              | tprA            | Tetratricopeptide repeat (TPR)-containing protein | prot_ID_186        | AN10448       |         |

# AN4827 cluster

Functional annotations not related to secondary metabolism

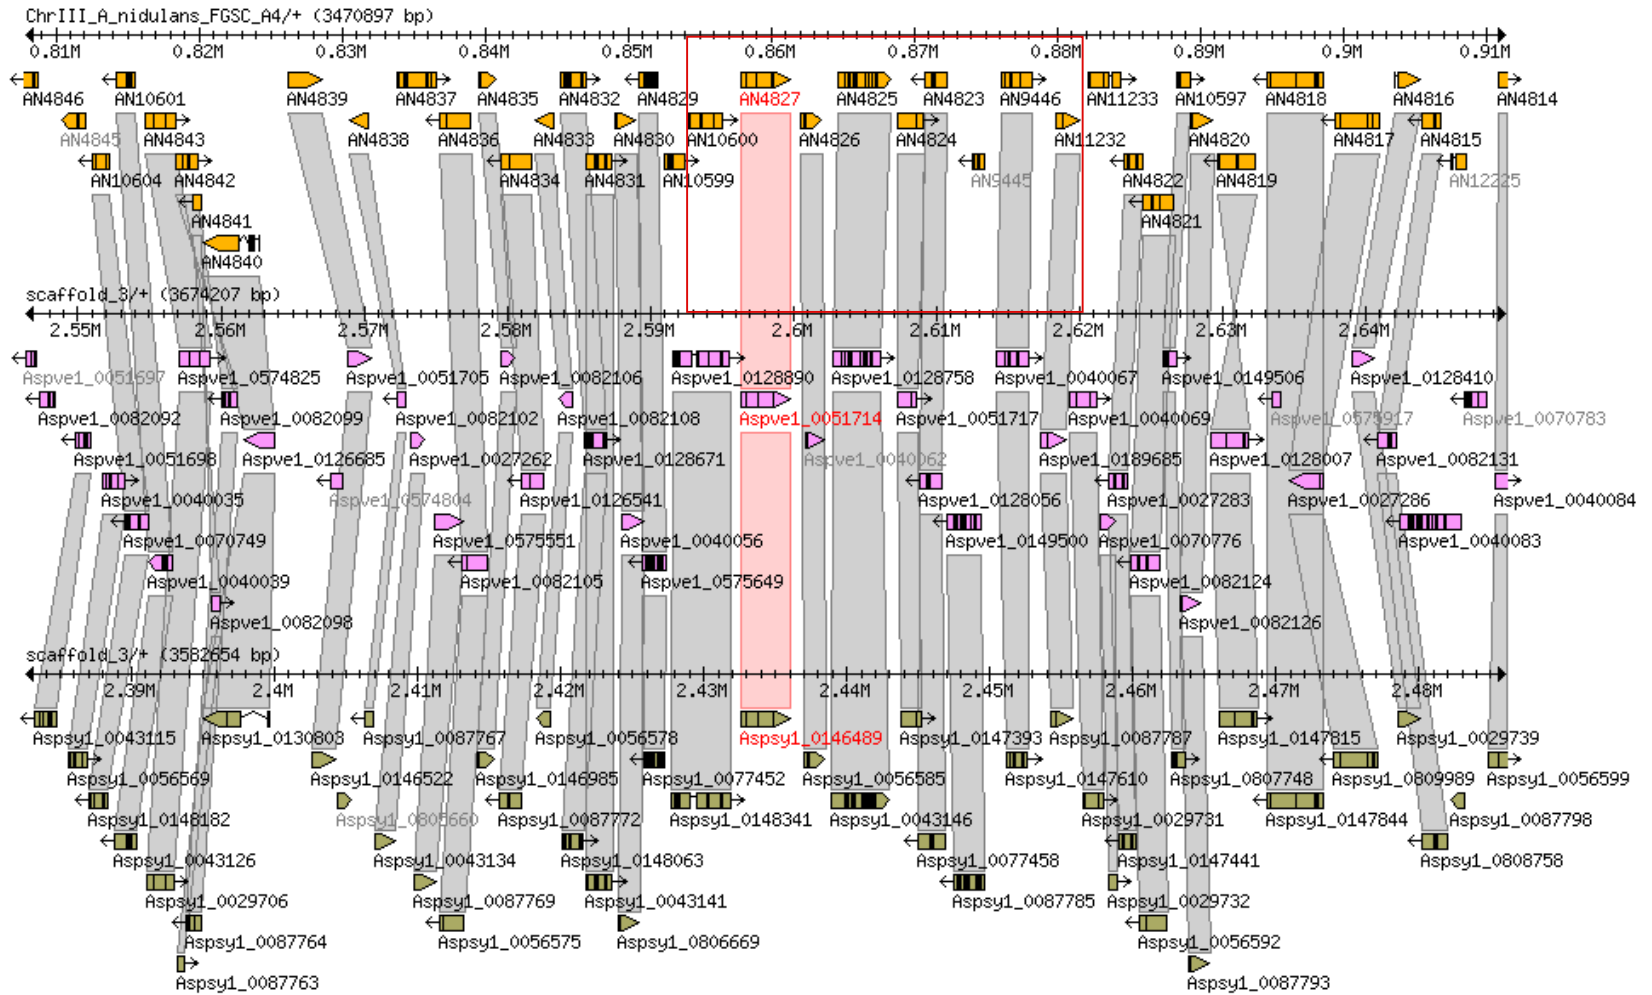



**AN4827 cluster**

| Gene id (SMURF)* | Gene positions | Gene distance | Annotated_gene_function (SMURF) | AspGD gene name | AspGD manual annotation and notes                                      | antiSMASH ID       | Gene ID       |    |
|------------------|----------------|---------------|---------------------------------|-----------------|------------------------------------------------------------------------|--------------------|---------------|----|
| n/a              |                |               |                                 |                 | Phosphatidylinositol:UDP-GlcNAc transferase PIG-C                      | prot_ID_780        | AN11232       | EP |
| n/a              |                |               |                                 | panK            | Pantothenate kinase                                                    | prot_ID_816        | AN9446        |    |
| n/a              |                |               |                                 |                 | ATP-dependent helicase                                                 | prot_ID_187        | AN9445        |    |
| AN4823.3         | 4              | 227           | conserved hypothetical protein  |                 | Chitin deacetylase                                                     | prot_ID_371        | AN4823        |    |
| AN4824.3         | 3              | 635           | conserved hypothetical protein  |                 | Glycosyl transferase                                                   | prot_ID_1008       | AN4824        |    |
| AN4825.3         | 2              | 1077          | conserved hypothetical protein  |                 | Glucan 1,3-beta-glucosidase                                            | prot_ID_485        | AN4825        |    |
| AN4826.3         | 1              | 785           | conserved hypothetical protein  |                 | Transmembrane transporter                                              | prot_ID_1120       | AN4826        |    |
| AN4827.3         | 0              | 0             | NRPS-like enzyme                |                 | NRPS-like enzyme                                                       | <b>prot_ID_590</b> | <b>AN4827</b> |    |
| AN10600.3        | -1             | 1290          | hypothetical protein            |                 | Zn(II)2Cys6 transcription factor                                       | prot_ID_800        | AN10600       | EP |
| AN10599.3        | -2             | 315           | hypothetical protein            |                 | Mandelate racemase/muconate lactonizing enzyme family protein          | prot_ID_384        | AN10599       |    |
| AN4829.3         | -3             | 519           | hypothetical protein            |                 | Reductase with a predicted role in carbohydrate metabolism             | prot_ID_701        | AN4829        |    |
| AN4830.3         | -4             | 222           | conserved hypothetical protein  |                 | Phosphopantothenate-cysteine ligase                                    | prot_ID_892        | AN4830        |    |
| AN4831.3         | -5             | 413           | conserved hypothetical protein  |                 | Oxidoreductase                                                         | prot_ID_370        | AN4831        |    |
| AN4832.3         | -6             | 506           | conserved hypothetical protein  |                 | Protein of unknown function                                            | prot_ID_1007       | AN4832        |    |
| AN4833.3         | -7             | 632           | conserved hypothetical protein  |                 | Hydrolase                                                              | prot_ID_484        | AN4833        |    |
| AN11448.3        | -8             | 317           | predicted protein               |                 | Deleted by the Broad                                                   | n/a                | AN11448       |    |
| AN4834.3         | -9             | 636           | conserved hypothetical protein  |                 | Protein of unknown function                                            | prot_ID_1119       | AN4834        |    |
| AN4835.3         | -10            | 319           | conserved hypothetical protein  |                 | Domain(s) with predicted role in cell division, chromosome segregation | prot_ID_589        | AN4835        |    |
| AN4836.3         | -11            | 494           | conserved hypothetical protein  |                 | Ortholog(s) have Golgi apparatus localization                          | prot_ID_75         | AN4836        |    |
| <b>AN4837.3</b>  | -12            | 559           | conserved hypothetical protein  |                 | Zn(II)2Cys6 transcription factor                                       | n/a                | AN4837        |    |

# AN5318 cluster

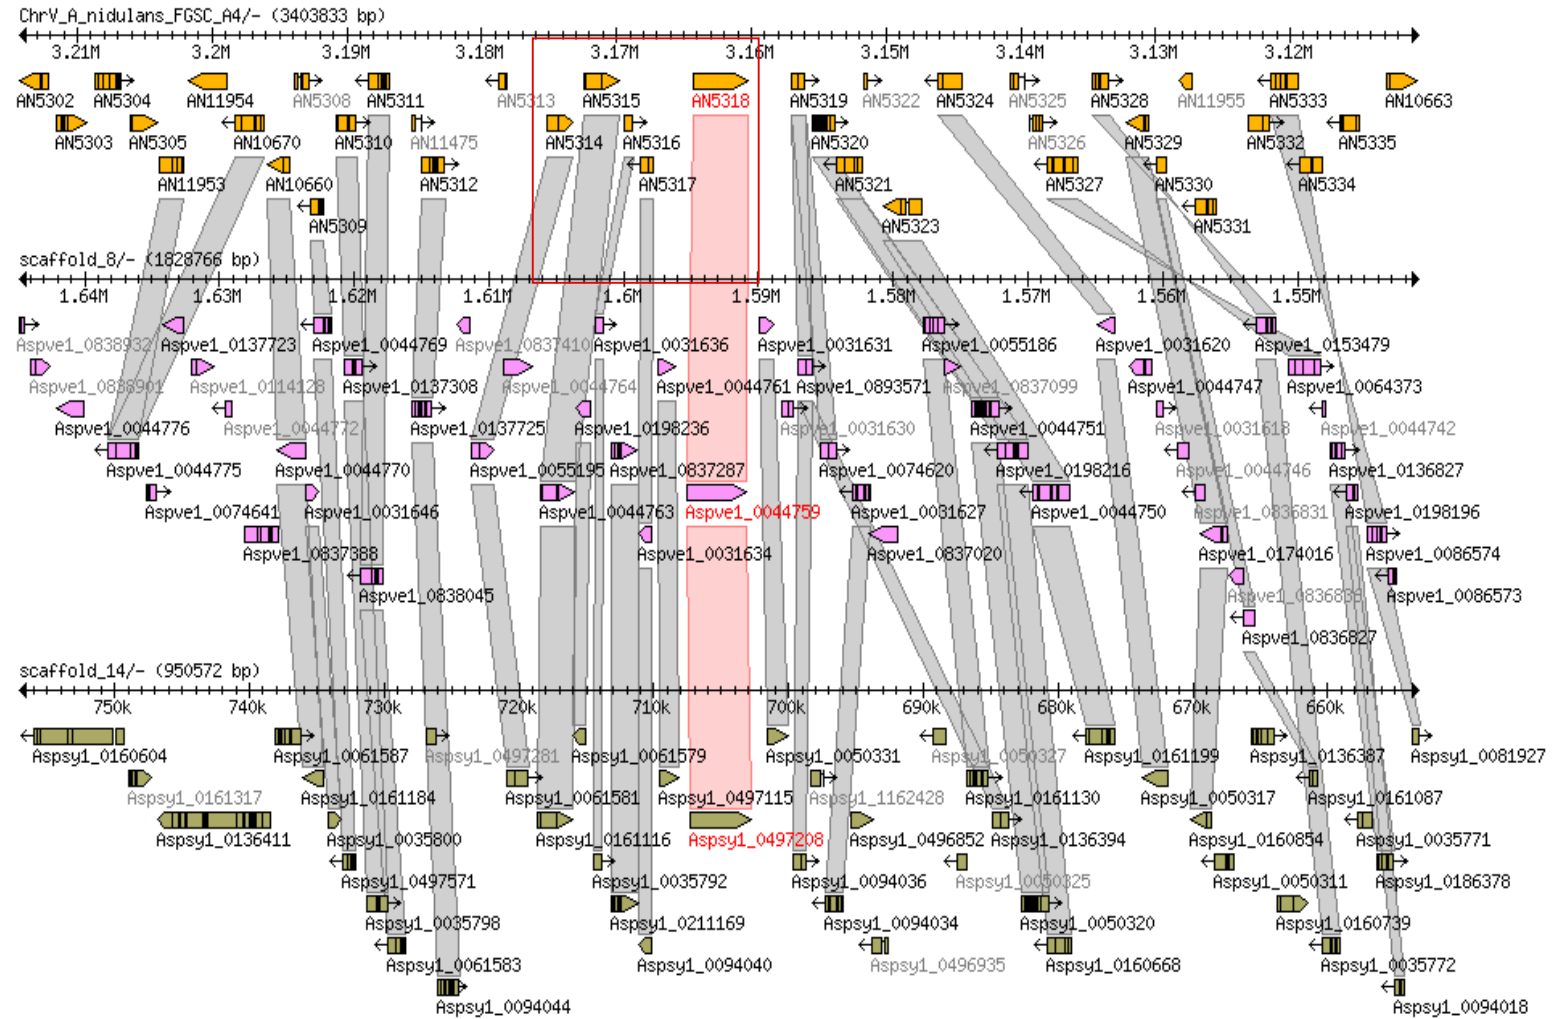

**AN5318 cluster**

| Gene id (SMURF)* | Gene positions | Gene distance | Annotated_gene_function (SMURF) | AspGD gene name | AspGD manual annotation and notes                                        | antiSMASH ID       | Gene ID       |     |
|------------------|----------------|---------------|---------------------------------|-----------------|--------------------------------------------------------------------------|--------------------|---------------|-----|
| n/a              |                |               |                                 |                 | Protein of unknown function                                              | prot_ID_137        | AN5312        |     |
| n/a              |                |               |                                 |                 | Protein of unknown function                                              | prot_ID_707        | AN5313        |     |
| n/a              |                |               |                                 |                 | Domain(s) with predicted catalytic activity, pyridoxal phosphate binding | prot_ID_242        | AN5314        | ECS |
| n/a              |                |               |                                 |                 | Protein of unknown function                                              | prot_ID_811        | AN5315        |     |
| n/a              |                |               |                                 |                 | Protein of unknown function                                              | prot_ID_342        | AN5316        |     |
| AN5317.3         | 1              | 2716          | conserved hypothetical protein  |                 | NmrA-like family protein                                                 | prot_ID_903        | AN5317        |     |
| <b>AN5318.3</b>  | 0              | 0             | NRPS-like enzyme                |                 | Non-ribosomal peptide synthetase                                         | <b>prot_ID_448</b> | <b>AN5318</b> | ECS |
| AN5319.3         | -1             | 3277          | conserved hypothetical protein  |                 | Protein of unknown function                                              | prot_ID_1006       | AN5319        |     |
| AN5320.3         | -2             | 475           | conserved hypothetical protein  |                 | Hydrolase                                                                | prot_ID_134        | AN5320        |     |
| AN5321.3         | -3             | 105           | conserved hypothetical protein  |                 | Triacylglycerol lipase                                                   | prot_ID_704        | AN5321        |     |
| AN5322.3         | -4             | 200           | conserved hypothetical protein  |                 | Protein of unknown function                                              | prot_ID_239        | AN5322        |     |
| AN5323.3         | -5             | 1143          | hypothetical protein            |                 | Substrate-specific transmembrane transporter                             | prot_ID_809        | AN5323        |     |
| AN5324.3         | -6             | 1860          | conserved hypothetical protein  | dIpA            | Dehydrin-like protein                                                    | prot_ID_339        | AN5324        |     |
| AN5325.3         | -7             | 3548          | conserved hypothetical protein  |                 | Protein of unknown function                                              | prot_ID_901        | AN5325        |     |
| AN5326.3         | -8             | 646           | conserved hypothetical protein  |                 | Protein of unknown function                                              | n/a                | AN5326        |     |
| AN5327.3         | -9             | 161           | conserved hypothetical protein  |                 | GTPase                                                                   | n/a                | AN5327        |     |
| AN5328.3         | -10            | 1031          | conserved hypothetical protein  |                 | Oxidoreductase                                                           | n/a                | AN5328        |     |
| AN5329.3         | -11            | 1328          | conserved hypothetical protein  |                 | Transmembrane transporter                                                | n/a                | AN5329        |     |

## AN5475 cluster

Possible orphan PKS, no boundary prediction by any method

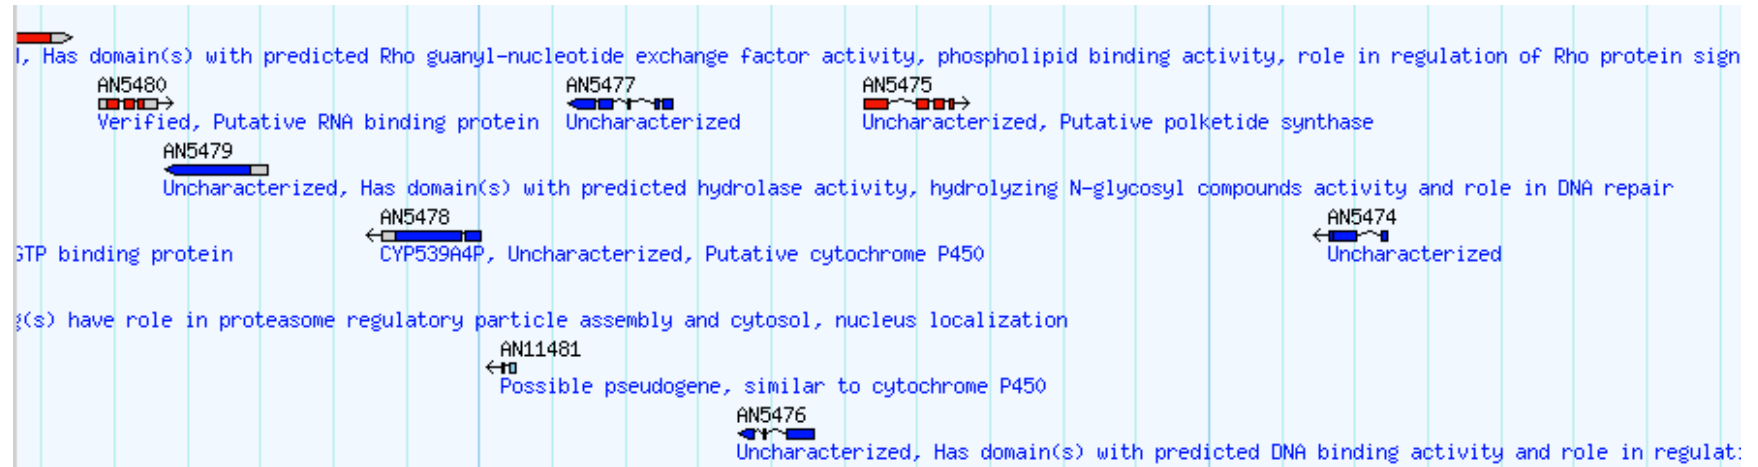

**AN5475 cluster**

| Gene id (SMURF)* | Gene positions | Gene distance | Annotated_gene_function (SMURF) | AspGD gene name | AspGD manual annotation and notes | antiSMASH ID | Gene ID |
|------------------|----------------|---------------|---------------------------------|-----------------|-----------------------------------|--------------|---------|
| n/a              |                |               |                                 |                 | Polyketide synthase               | n/a          | AN5475  |

## AN5610 cluster

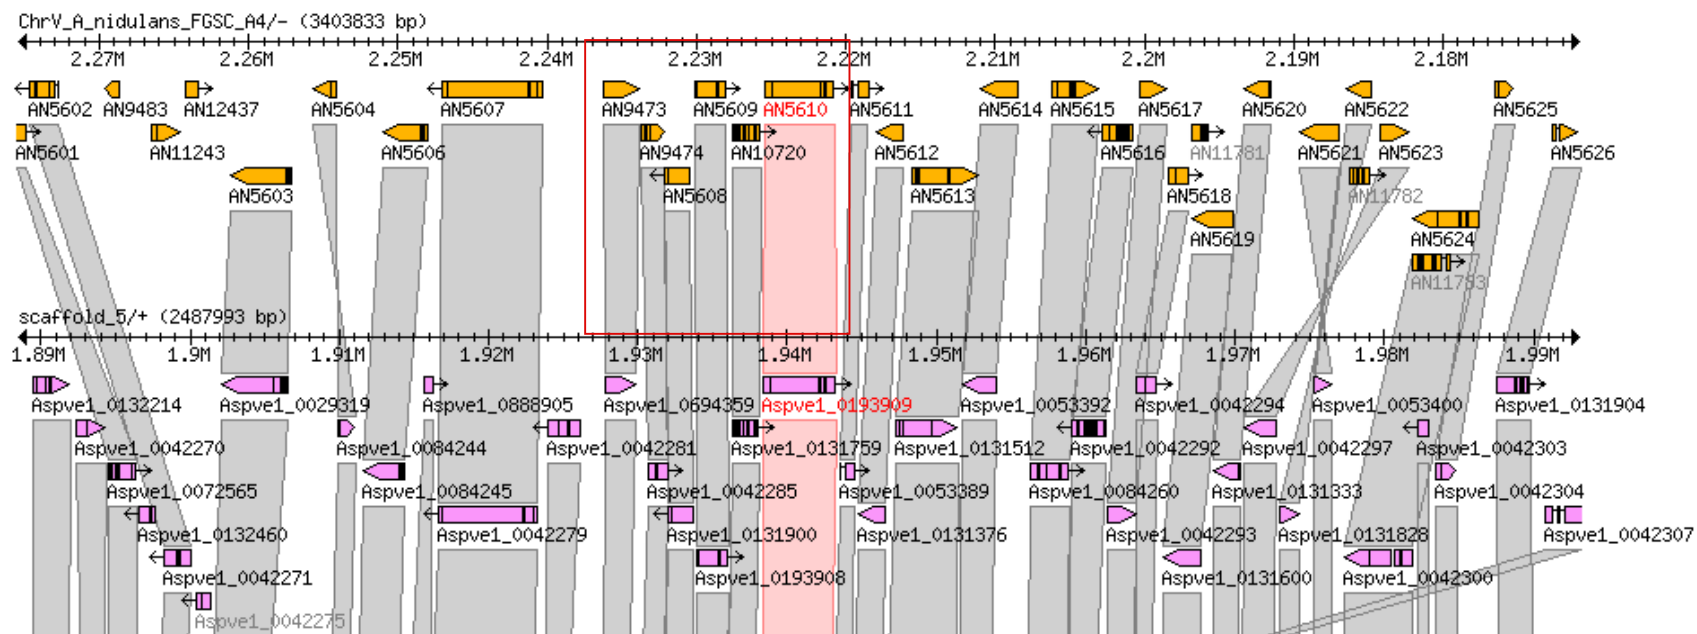

**AN5610 cluster**

| Gene id (SMURF)* | Gene positions | Gene distance | Annotated_gene_function (SMURF) | AspGD gene name | AspGD manual annotation and notes                  | antiSMASH ID | Gene ID |          |
|------------------|----------------|---------------|---------------------------------|-----------------|----------------------------------------------------|--------------|---------|----------|
| n/a              |                |               |                                 |                 | proteasome activator subunit 4                     | prot_ID_259  | AN5607  |          |
| n/a              |                |               |                                 |                 | Protein of unknown function                        | prot_ID_380  | AN9473  | ECS, IGD |
| n/a              |                |               |                                 |                 | Aldo-keto reductase                                | prot_ID_938  | AN9474  |          |
| n/a              |                |               |                                 |                 | Protein of unknown function                        | prot_ID_829  | AN5608  |          |
| n/a              |                |               |                                 |                 | Zn(II)2Cys6 transcription factor                   | prot_ID_360  | AN5609  |          |
| n/a              |                |               |                                 |                 | MFS transporter                                    | prot_ID_44   | AN10720 |          |
| n/a              |                |               |                                 |                 | L-aminoadipate-semialdehyde dehydrogenase          | prot_ID_534  | AN5610  | FA       |
| n/a              |                |               |                                 | canA            | Carbonic anhydrase                                 | prot_ID_58   | AN5611  |          |
| n/a              |                |               |                                 |                 | Protein of unknown function                        | prot_ID_629  | AN5612  |          |
| n/a              |                |               |                                 | hxA             | Xanthine dehydrogenase                             | prot_ID_155  | AN5613  |          |
| n/a              |                |               |                                 |                 | Pheromone-regulated multispanning membrane protein | prot_ID_727  | AN5614  |          |
| n/a              |                |               |                                 |                 | Protein of unknown function                        | prot_ID_257  | AN5615  |          |
| n/a              |                |               |                                 |                 | Kynurenine aminotransferase                        | prot_ID_828  | AN5616  |          |

# AN6236 cluster

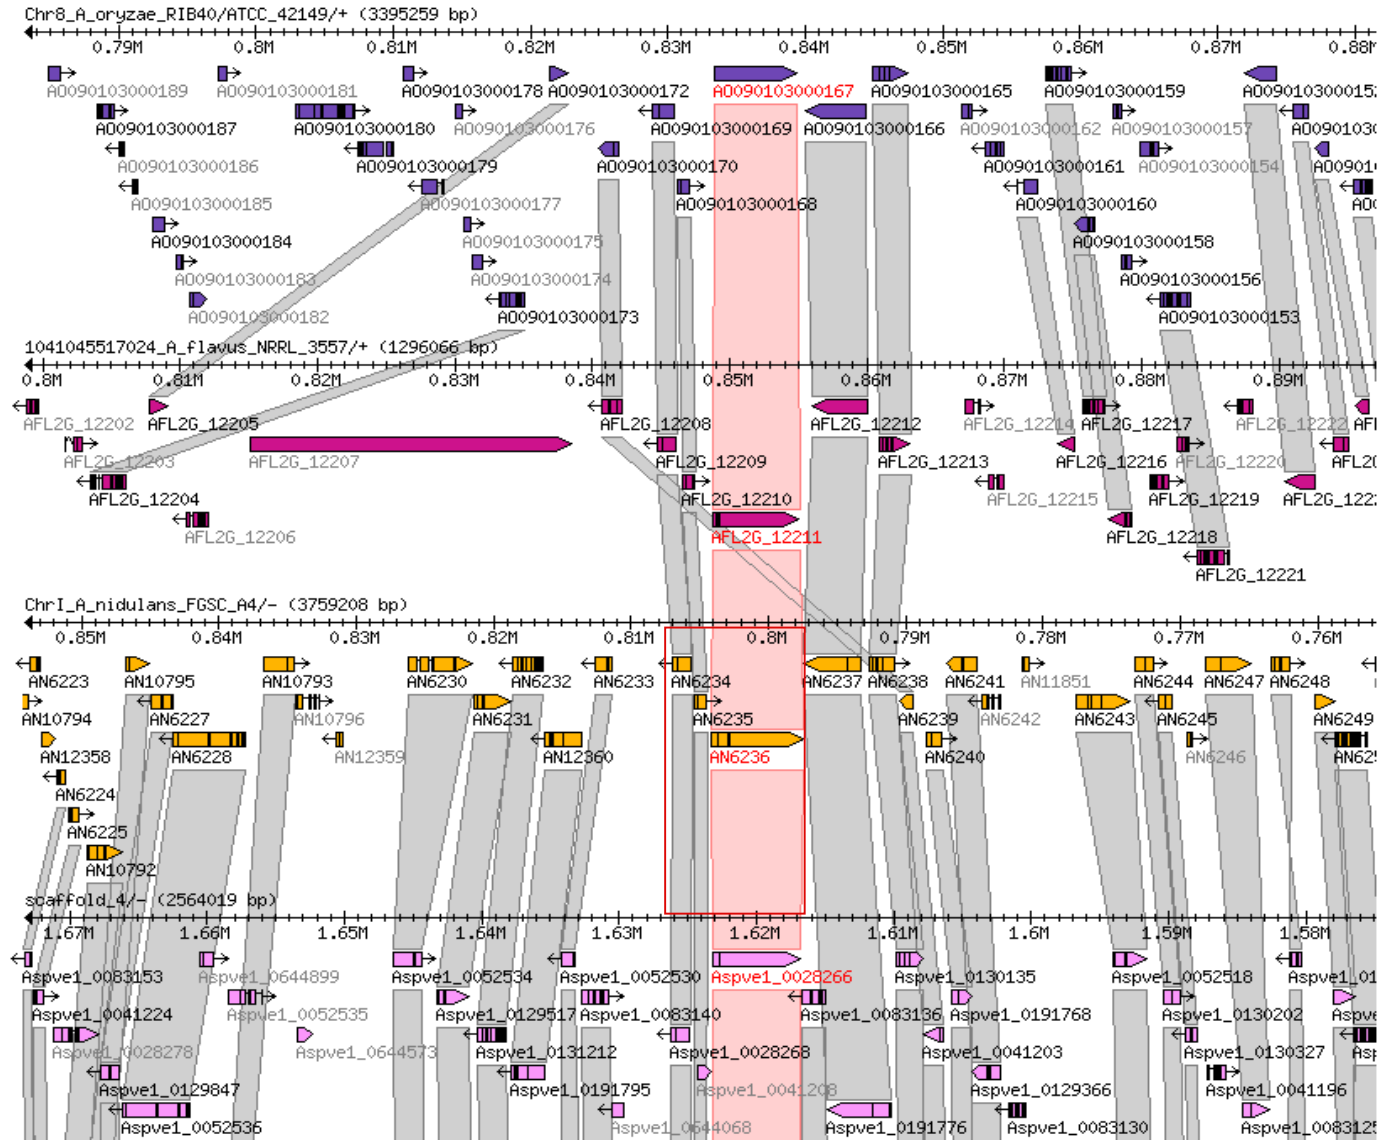



**AN6236 cluster**

| Gene id (SMURF)* | Gene positions | Gene distance | Annotated_gene_function (SMURF)                     | AspGD gene name | AspGD manual annotation and notes             | antiSMASH ID       | Gene ID       |         |
|------------------|----------------|---------------|-----------------------------------------------------|-----------------|-----------------------------------------------|--------------------|---------------|---------|
| n/a              |                |               |                                                     | medA            | medusa, regulator of conidiophore development | prot_ID_378        | AN6230        |         |
| n/a              |                |               |                                                     | trpB            | Tryptophan synthase                           | prot_ID_1061       | AN6231        |         |
| n/a              |                |               |                                                     | vmaB            | F1F0-ATPase complex subunit                   | prot_ID_500        | AN6232        |         |
| n/a              |                |               |                                                     |                 | Protein of unknown function                   | prot_ID_1266       | AN12360       |         |
| n/a              |                |               |                                                     |                 | DnaJ domain protein                           | prot_ID_1182       | AN6233        |         |
| n/a              |                |               |                                                     |                 | siderophore biosynthesis acetylase AceI       | prot_ID_625        | AN6234        | ECS, EP |
| n/a              |                |               |                                                     |                 | Enoyl-CoA hydratase/isomerase family protein  | prot_ID_60         | AN6235        |         |
| <b>AN6236.3</b>  | 0              | 0             | nonribosomal peptide synthetase                     |                 | <b>Nonribosomal peptide synthetase</b>        | <b>prot_ID_745</b> | <b>AN6236</b> | ECS, EP |
| AN6237.3         | -1             | 353           | hypothetical protein conserved hypothetical protein |                 | Transmembrane transporter                     | prot_ID_178        | AN6237        |         |
| AN6238.3         | -2             | 358           |                                                     |                 | Transmembrane transporter                     | prot_ID_866        | AN6238        |         |
| n/a              |                |               |                                                     |                 | Protein of unknown function                   | prot_ID_293        | AN6239        |         |
| n/a              |                |               |                                                     |                 | Protein of unknown function                   | prot_ID_496        | AN6240        |         |
| n/a              |                |               |                                                     |                 | Protein of unknown function                   | prot_ID_1179       | AN6241        |         |
| n/a              |                |               |                                                     |                 | Protein of unknown function                   | prot_ID_622        | AN6242        |         |
| n/a              |                |               |                                                     |                 | Protein of unknown function                   | prot_ID_1263       | AN11851       |         |

# AN6431 cluster

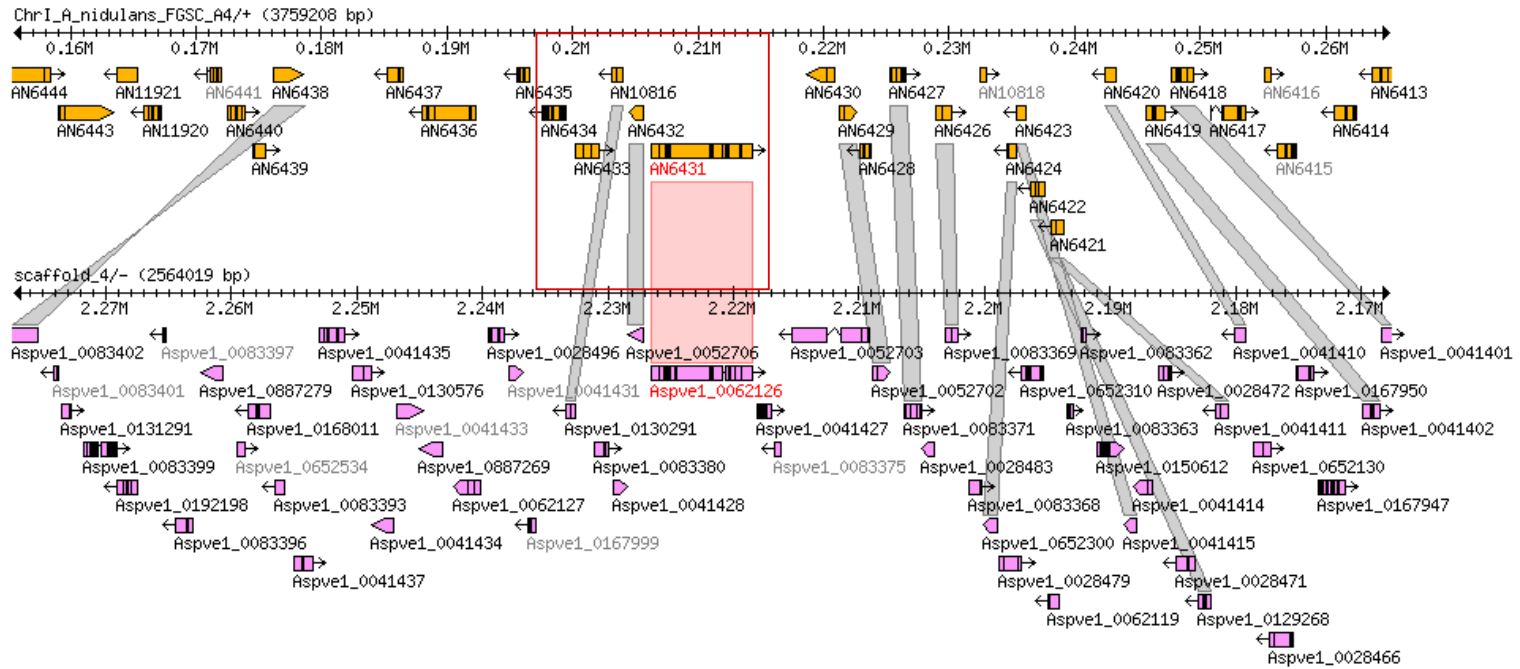

**AN6431 cluster**

| Gene id (SMURF)* | Gene positions | Gene distance | Annotated_gene_function (SMURF) | AspGD gene name | AspGD manual annotation and notes  | antiSMASH ID       | Gene ID       |         |
|------------------|----------------|---------------|---------------------------------|-----------------|------------------------------------|--------------------|---------------|---------|
| n/a              |                |               |                                 |                 | Protein of unknown function        | prot_ID_631        | AN10818       |         |
| n/a              |                |               |                                 |                 | Protein of unknown function        | prot_ID_1011       | AN6426        |         |
| n/a              |                |               |                                 | manC            | Endo-beta-(1,4)-mannanase          | prot_ID_449        | AN6427        |         |
| n/a              |                |               |                                 |                 | Beta-1,4-endoglucanase             | prot_ID_1135       | AN6428        |         |
| AN6429.3         | 2              | 331           | conserved hypothetical protein  |                 | Transmembrane transporter          | prot_ID_574        | AN6429        |         |
| AN6430.3         | 1              | 1146          | C6 transcription factor         |                 | Zn(II)2Cys6 transcription factor   | prot_ID_773        | AN6430        |         |
| <b>AN6431.3</b>  | 0              | 0             | polyketide synthase             |                 | <b>Polyketide synthase</b>         | <b>prot_ID_204</b> | <b>AN6431</b> | ECS, EP |
|                  |                |               | conserved hypothetical protein  |                 | <b>Protein of unknown function</b> | prot_ID_894        | AN6432        |         |
| AN6432.3         | -1             | 581           | conserved hypothetical protein  |                 | <b>Protein of unknown function</b> | prot_ID_507        | AN10816       |         |
| AN10816.3        | -2             | 528           | hypothetical protein            |                 |                                    |                    |               |         |
| AN6433.3         | -3             | 136           | conserved hypothetical protein  |                 | <b>Predicted transferase</b>       | prot_ID_324        | AN6433        |         |
| AN6434.3         | -4             | 806           | conserved hypothetical protein  | CYP672A1        | <b>Cytochrome P450</b>             | prot_ID_1010       | AN6434        | EP      |
| n/a              |                |               |                                 |                 | Protein of unknown function        | prot_ID_448        | AN6435        |         |
| n/a              |                |               |                                 |                 | Transmembrane transporter          | prot_ID_1134       | AN6436        |         |
| n/a              |                |               |                                 |                 | Protein of unknown function        | prot_ID_573        | AN6437        |         |

# AN6791 cluster

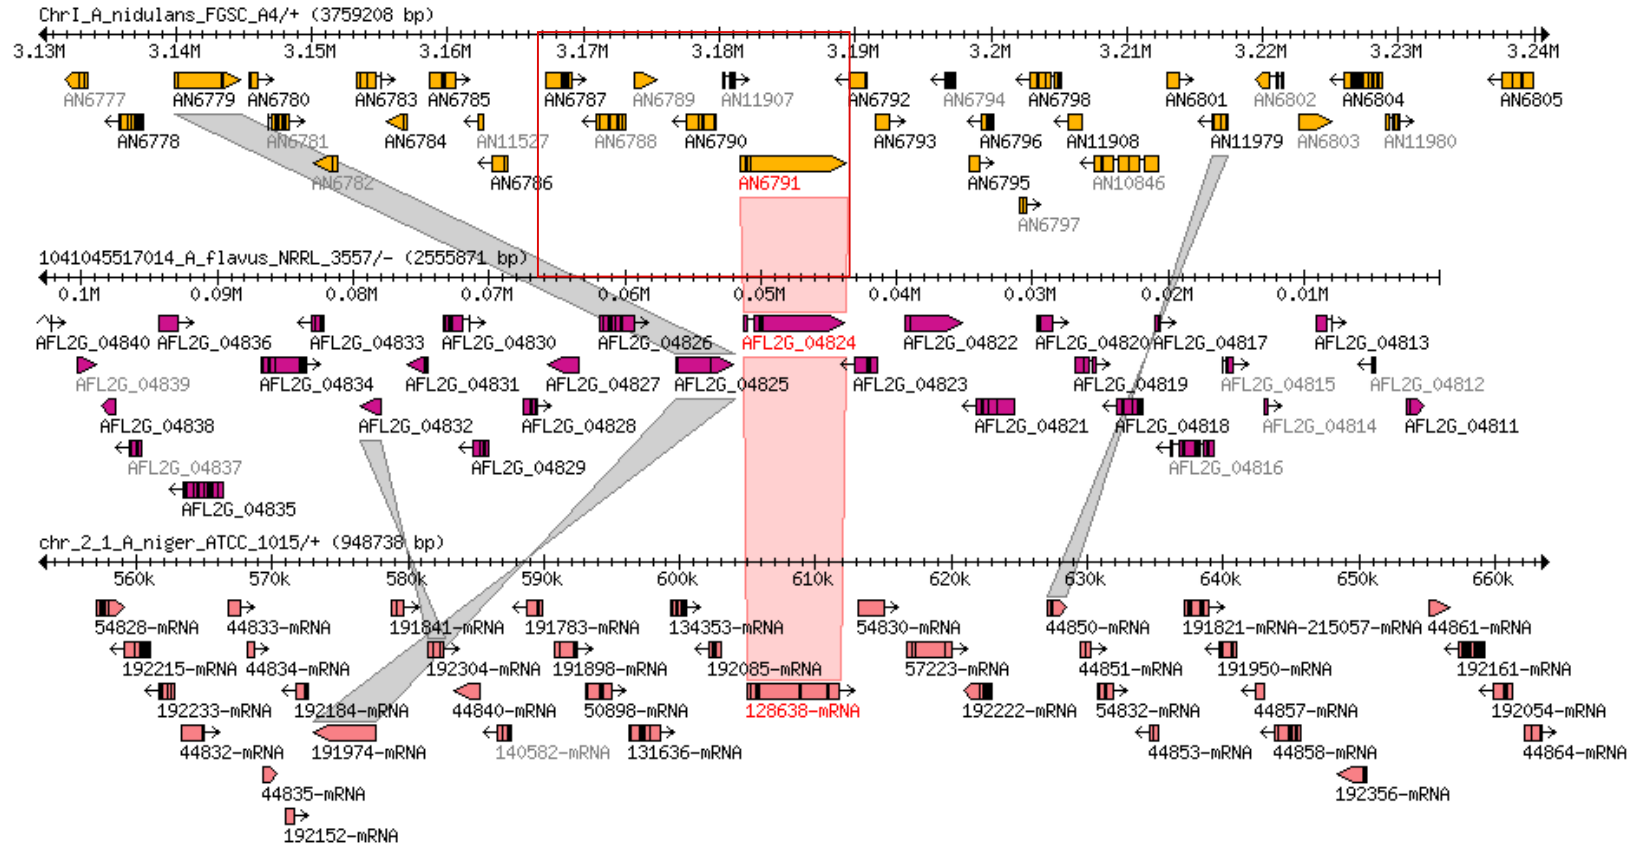

**AN6791 cluster**

| Gene id (SMURF)* | Gene positions | Gene distance | Annotated_gene_function (SMURF) | AspGD gene name | AspGD manual annotation and notes                 | antiSMASH ID | Gene ID       |     |
|------------------|----------------|---------------|---------------------------------|-----------------|---------------------------------------------------|--------------|---------------|-----|
| n/a              |                |               |                                 |                 | Protein of unknown function                       | prot_ID_1002 | AN11527       |     |
| n/a              |                |               |                                 |                 | Beta-1,4-endoglucanase                            | prot_ID_1076 | AN6786        |     |
| n/a              |                |               |                                 | CYP682C1        | Cytochrome P450                                   | prot_ID_515  | AN6787        | IGD |
| n/a              |                |               |                                 |                 | Zn(II)2Cys6 transcription factor                  | prot_ID_1196 | AN6788        |     |
| n/a              |                |               |                                 |                 | Protein of unknown function                       | prot_ID_638  | AN6789        |     |
| n/a              |                |               |                                 |                 | Protein of unknown function                       | prot_ID_838  | AN6790        |     |
| n/a              |                |               |                                 |                 | Protein of unknown function                       | prot_ID_1313 | AN11907       |     |
| n/a              |                |               |                                 |                 | Polyketide synthase                               | prot_ID_265  | <b>AN6791</b> | FA  |
| n/a              |                |               |                                 |                 | NAD+ dependent glycerol 3-phosphate dehydrogenase | prot_ID_953  | AN6792        |     |
| n/a              |                |               |                                 |                 | Protein of unknown function                       | prot_ID_390  | AN6793        |     |
| n/a              |                |               |                                 |                 | Protein of unknown function                       | prot_ID_1075 | AN6794        |     |
| n/a              |                |               |                                 |                 | Protein of unknown function                       | prot_ID_514  | AN6795        |     |
| n/a              |                |               |                                 |                 | ThiJ/PfpI family protein                          | prot_ID_1195 | AN6796        |     |
| n/a              |                |               |                                 |                 | Protein of unknown function                       | prot_ID_636  | AN6797        |     |
| n/a              |                |               |                                 |                 | Protein of unknown function                       | prot_ID_72   | AN6798        |     |
| n/a              |                |               |                                 |                 | Hydrolase                                         | prot_ID_1323 | AN11908       |     |
| n/a              |                |               |                                 |                 |                                                   | prot_ID_864  | AN10846       |     |

## AN7084 cluster

Overlaps end of pkg cluster

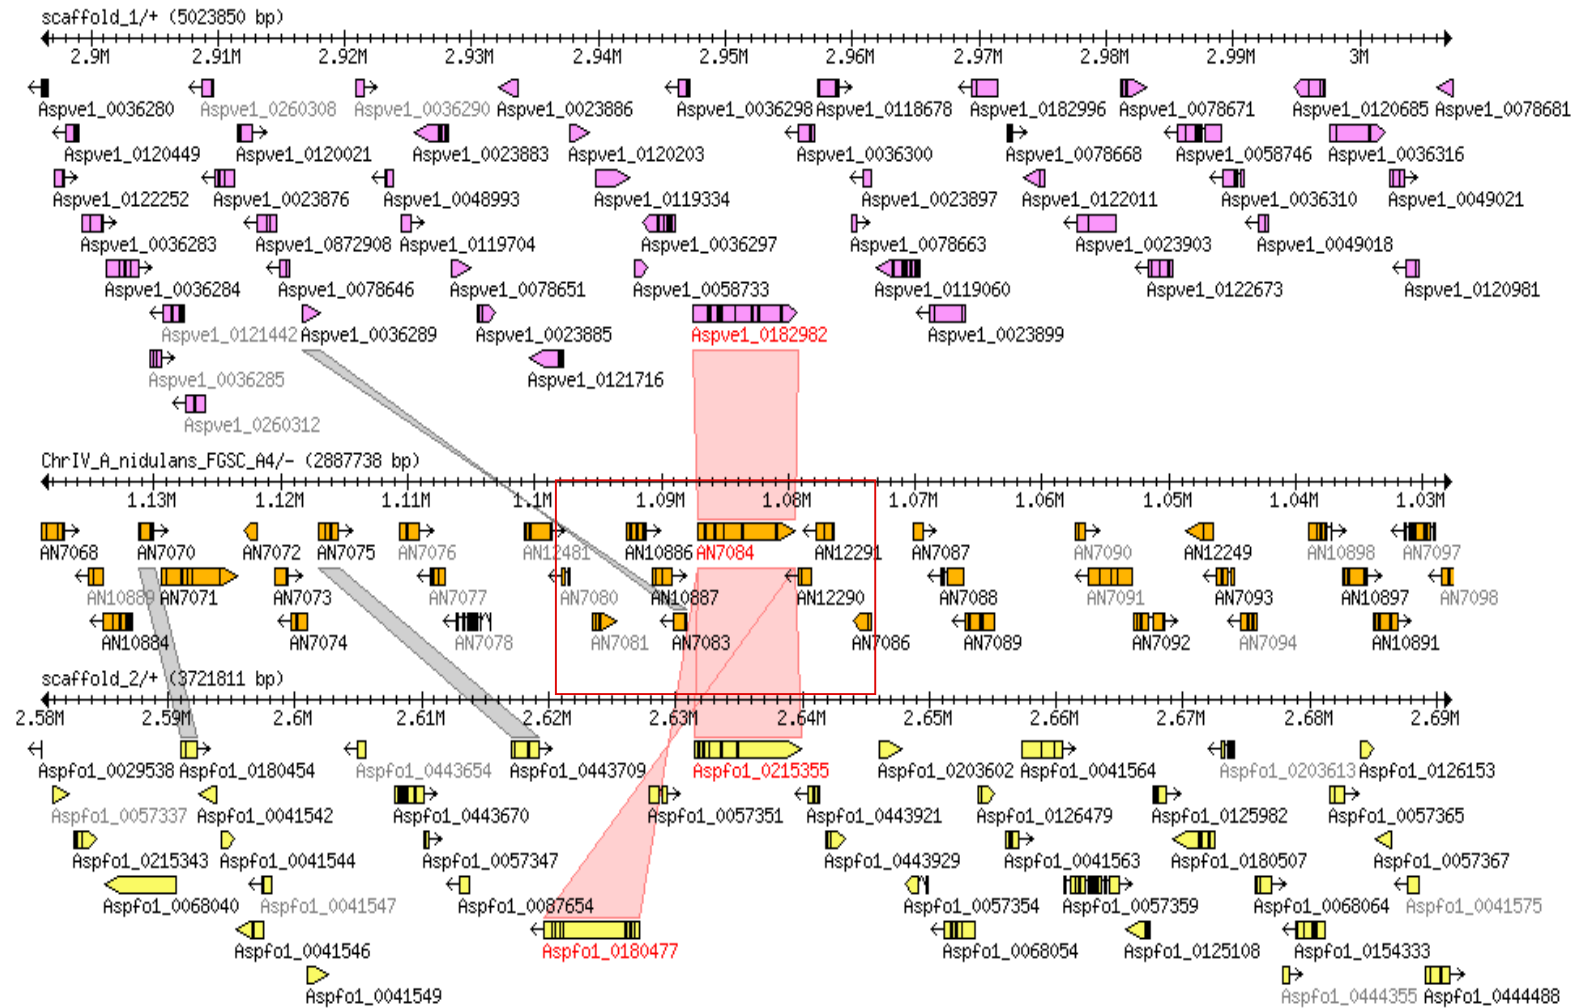

**AN7084 cluster**

| Gene id (SMURF)* | Gene positions | Gene distance | Annotated_gene_function (SMURF) | AspGD gene name | AspGD manual annotation and notes                                 | antiSMASH ID       | Gene ID       |    |
|------------------|----------------|---------------|---------------------------------|-----------------|-------------------------------------------------------------------|--------------------|---------------|----|
| n/a              |                |               |                                 | acnA            | Actinin-like protein                                              | prot_ID_412        | AN7077        |    |
| n/a              |                |               |                                 |                 | Protein of unknown function                                       | prot_ID_930        | AN7078        |    |
| n/a              |                |               |                                 |                 | Protein of unknown function                                       | prot_ID_1004       | AN12481       |    |
| n/a              |                |               |                                 |                 | Protein of unknown function<br>UDP-N-acetylmuramate dehydrogenase | prot_ID_648        | AN7080        | EP |
| AN7081.3         | 4              | 839           | conserved hypothetical protein  |                 |                                                                   | prot_ID_229        | AN7081        |    |
| AN10886.3        | 3              | 399           | conserved hypothetical protein  |                 | Protein of unknown function                                       | prot_ID_59         | AN10886       |    |
| AN10887.3        | 2              | 79            | conserved hypothetical protein  | CYP5095B1       | cytochrome P450                                                   | prot_ID_568        | AN10887       |    |
| AN7083.3         | 1              | 612           | conserved hypothetical protein  |                 | Aminopeptidase polyketide synthase (PKS)-like enzyme              | prot_ID_319        | AN7083        |    |
| <b>AN7084.3</b>  | 0              | 0             | PKS-like enzyme                 |                 | Oxidoreductase                                                    | <b>prot_ID_836</b> | <b>AN7084</b> |    |
| n/a              |                |               |                                 |                 | Protein of unknown function                                       | prot_ID_977        | AN12290       |    |
| n/a              |                |               |                                 |                 | Protein of unknown function                                       | prot_ID_999        | AN12291       |    |
| AN7085.3         | -1             | 239           | conserved hypothetical protein  |                 | Deleted ORF                                                       | n/a                |               |    |
| AN7086.3         | -2             | 1669          | conserved hypothetical protein  |                 | F-box protein                                                     | prot_ID_928        | AN7086        | EP |
| AN7087.3         | -3             | 3289          | conserved hypothetical protein  |                 | Protein of unknown function                                       | prot_ID_502        | AN7087        |    |
| AN7088.3         | -4             | 1397          | conserved hypothetical protein  |                 | Transmembrane transporter                                         | prot_ID_81         | AN7088        |    |
| AN7089.3         | -5             | 146           | conserved hypothetical protein  |                 | Protein of unknown function                                       | prot_ID_591        | AN7089        |    |

## AN7489 (mirC) cluster

Annotations not typical of secondary metabolite gene clusters

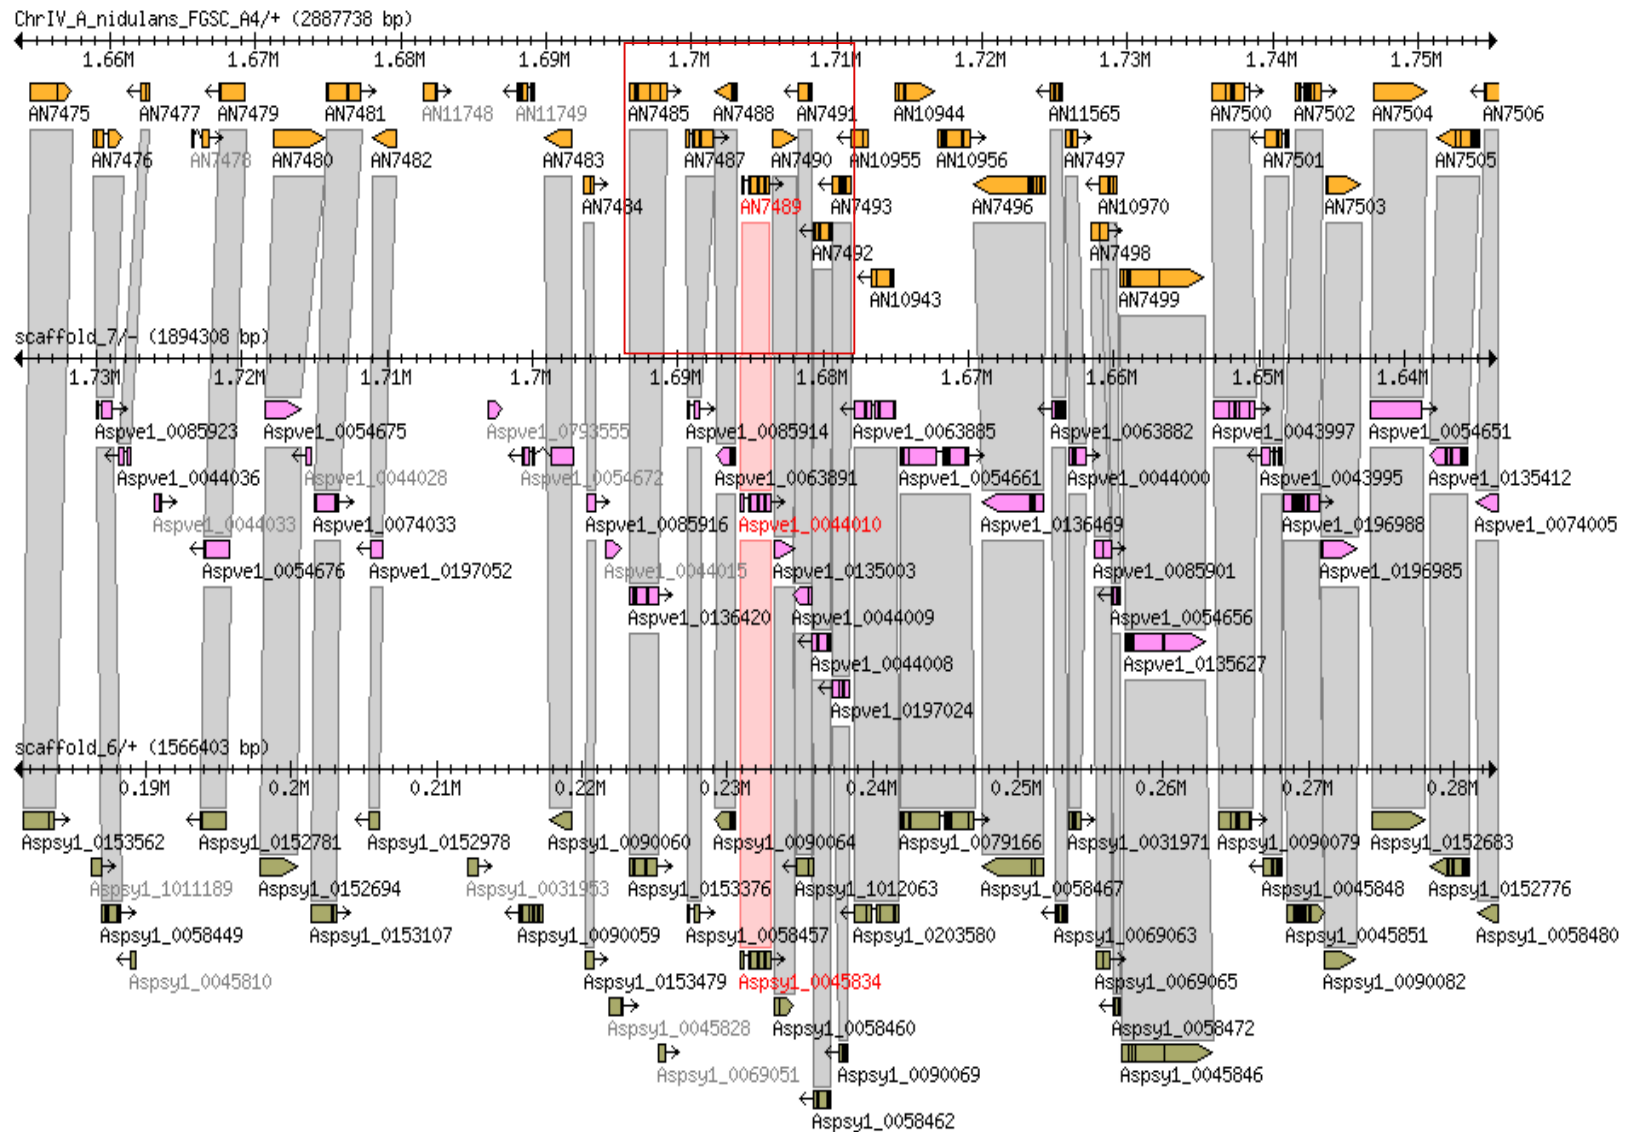



**AN7489 (mirC) cluster**

| Gene id (SMURF)* | Gene positions | Gene distance | Annotated_gene_function (SMURF)                         | AspGD gene name | AspGD manual annotation and notes                       | antiSMASH ID | Gene ID |     |
|------------------|----------------|---------------|---------------------------------------------------------|-----------------|---------------------------------------------------------|--------------|---------|-----|
| n/a              |                |               |                                                         |                 | Protein of unknown function                             | n/a          | AN11749 |     |
| n/a              |                |               |                                                         |                 | Protein of unknown function                             | n/a          | AN7483  |     |
| n/a              |                |               |                                                         |                 | DUF1349 domain protein                                  | n/a          | AN7484  |     |
| AN7485.3         | 4              | 103           | siderophore iron transporter                            | mirC            | siderophore iron transporter                            | n/a          | AN7485  | ECS |
| AN7486.3         | 3              | 595           | predicted protein                                       |                 | Deleted by the Broad                                    | n/a          | AN7486  |     |
| AN7487.3         | 2              | 81            | hypothetical protein similar to MODA                    | modA            | Rho GTPase                                              | n/a          | AN7487  |     |
| AN7488.3         | 1              | 598           | conserved hypothetical protein                          |                 | agmatinase                                              | n/a          | AN7488  |     |
| <b>AN7489.3</b>  | 0              | 0             | mitochondrial 3-oxoacyl-[acyl-carrier-protein]-synthase |                 | mitochondrial 3-oxoacyl-[acyl-carrier-protein]-synthase | n/a          | AN7489  |     |
| n/a              |                |               |                                                         |                 | MT-A70 family protein                                   | n/a          | AN7490  |     |
| n/a              |                |               |                                                         |                 | ubiquitin C-terminal hydrolase                          | n/a          | AN7491  |     |
| n/a              |                |               |                                                         |                 | mRNA decapping hydrolase                                | n/a          | AN7492  |     |
| n/a              |                |               |                                                         |                 | Protein of unknown function                             | n/a          | AN7493  | ECS |

## AN7838 (AN12331) cluster

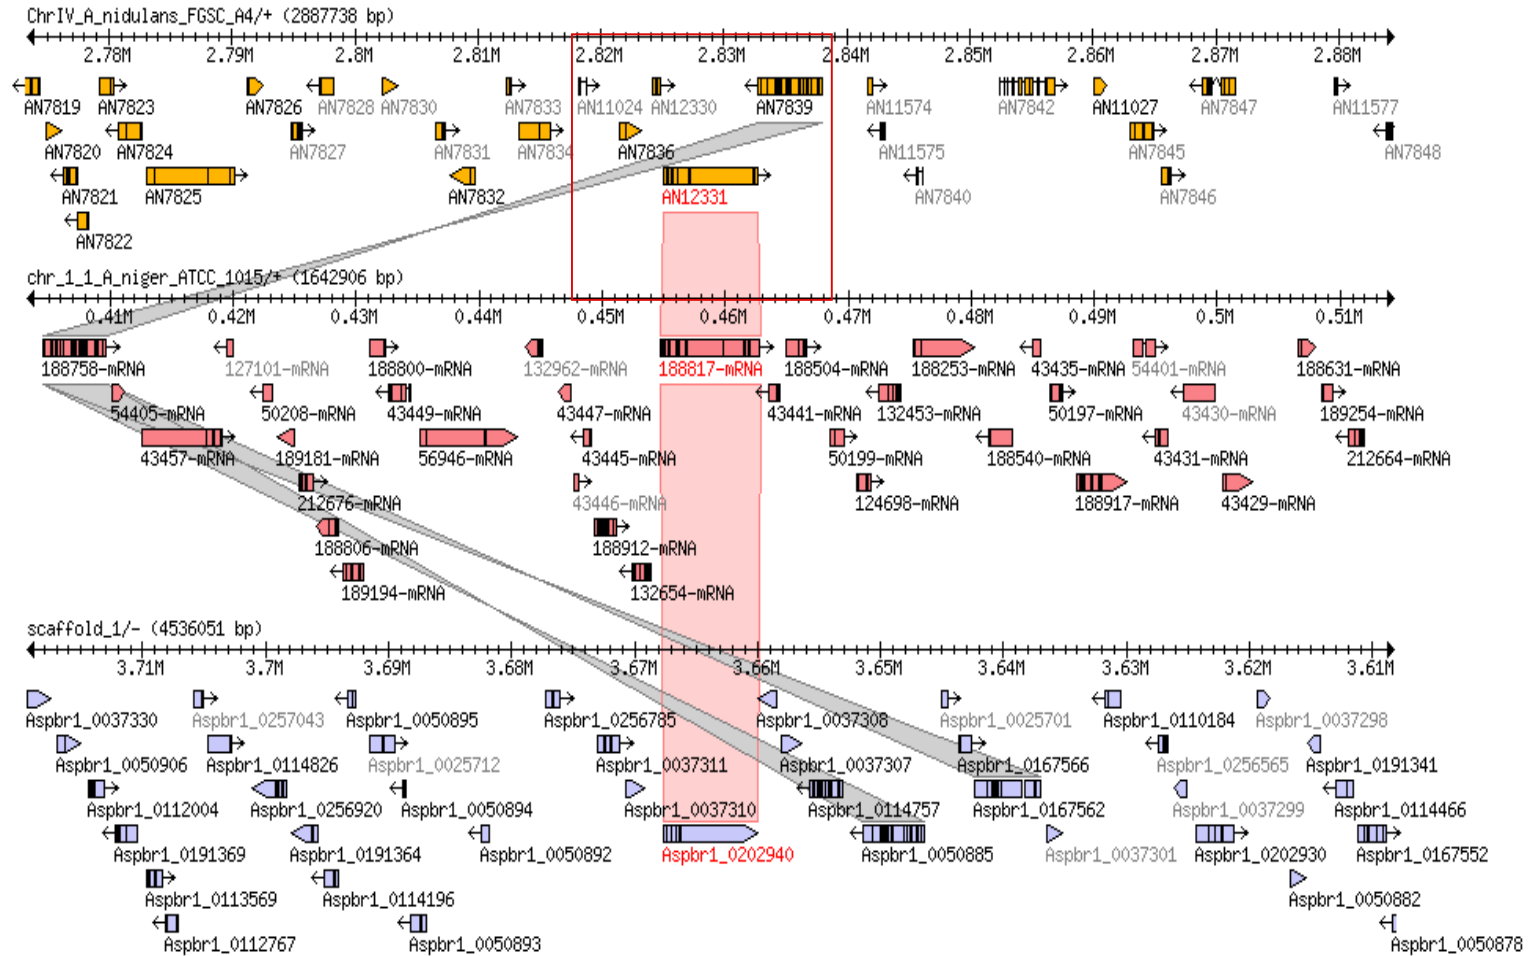

**AN7838 (AN12331) cluster**

| Gene id (SMURF)* | Gene positions | Gene distance | Annotated_gene_function (SMURF) | AspGD gene name | AspGD manual annotation and notes                                                   | antiSMASH ID | Gene ID |    |
|------------------|----------------|---------------|---------------------------------|-----------------|-------------------------------------------------------------------------------------|--------------|---------|----|
| n/a              |                |               |                                 |                 | Protein of unknown function                                                         | n/a          | AN7831  |    |
| n/a              |                |               |                                 |                 | Oxidoreductase                                                                      | n/a          | AN7832  |    |
| n/a              |                |               |                                 |                 | Protein of unknown function                                                         | n/a          | AN7833  |    |
| n/a              |                |               |                                 |                 | Protein of unknown function                                                         | n/a          | AN7834  |    |
| n/a              |                |               |                                 |                 | <b>Oxidoreductase</b>                                                               | n/a          | AN11024 | FA |
| AN7836.3         | 2              | 1176          | conserved hypothetical protein  |                 | <b>Protein of unknown function</b>                                                  | n/a          | AN7836  |    |
| AN7837.3         | 1              | 225           | PKS-like enzyme                 |                 | Deleted ORF                                                                         | n/a          | AN7837  |    |
|                  |                |               |                                 |                 | <b>Domain(s) with predicted catalytic activity and role in biosynthetic process</b> |              | AN12330 |    |
|                  |                |               |                                 |                 | <b>Polyketide synthase (PKS)-like enzyme</b>                                        | n/a          | AN12331 |    |
| <b>AN7838.3</b>  | 0              | 0             | PKS-like enzyme                 |                 | <b>Transmembrane transporter ATPase</b>                                             | n/a          | AN7839  | FA |
| AN7839.3         | -1             | 40            | conserved hypothetical protein  |                 | Protein of unknown function                                                         | n/a          | AN11574 |    |
| n/a              |                |               |                                 |                 | Protein of unknown function                                                         | n/a          | AN11575 |    |
| n/a              |                |               |                                 |                 | Protein of unknown function                                                         | n/a          | AN7840  |    |

## AN7884 cluster

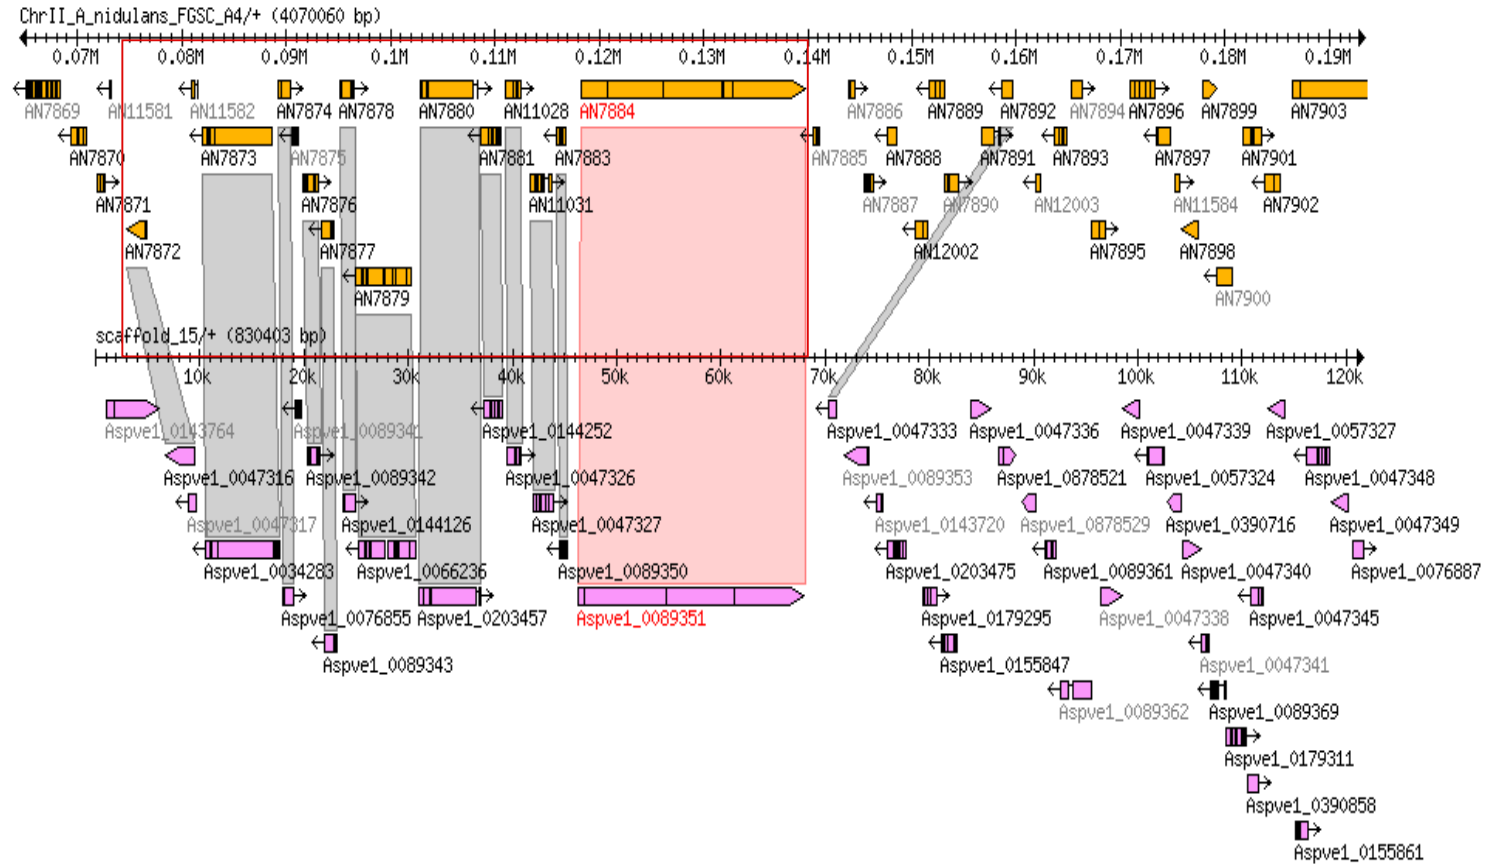

**AN7884 cluster**

| Gene id (SMURF)* | Gene positions | Gene distance | Annotated_gene_function (SMURF)            | AspGD gene name | AspGD manual annotation and notes          | antiSMASH ID       | Gene ID       |         |
|------------------|----------------|---------------|--------------------------------------------|-----------------|--------------------------------------------|--------------------|---------------|---------|
| n/a              |                |               |                                            |                 | Zn(2)C(6) transcription factor             | n/a                | AN7872        | ECS, EP |
| n/a              |                |               |                                            |                 | Protein of unknown function                | n/a                | AN11582       |         |
| AN7873.3         | 12             | 875           | fatty acid synthase beta subunit, putative |                 | Fatty acid synthase beta subunit           | n/a                | AN7873        |         |
| AN7874.3         | 11             | 247           | conserved hypothetical protein             |                 | Protein of unknown function                | n/a                | AN7874        |         |
| AN7875.3         | 10             | 625           | conserved hypothetical protein             |                 | Protein of unknown function                | n/a                | AN7875        |         |
| AN7876.3         | 9              | 228           | conserved hypothetical protein             |                 | Branched chain amino acid aminotransferase | n/a                | AN7876        |         |
| AN7877.3         | 8              | 552           | conserved hypothetical protein             |                 | RTA1 domain protein                        | n/a                | AN7877        |         |
| AN7878.3         | 7              | 311           | conserved hypothetical protein             |                 | Branched chain amino acid aminotransferase | n/a                | AN7878        |         |
| AN7879.3         | 6              | 1102          | conserved hypothetical protein             |                 | Transmembrane transporter ATPase           | prot_ID_1087       | AN7879        |         |
| AN7880.3         | 5              | 99            | fatty acid synthase subunit alpha          |                 | Fatty-acyl-CoA synthase                    | prot_ID_1305       | AN7880        |         |
| AN7881.3         | 4              | 662           | conserved hypothetical protein             | CYP548C1        | Cytochrome P450                            | prot_ID_684        | AN7881        |         |
| AN11028.3        | 3              | 1127          | conserved hypothetical protein             |                 | Oxidoreductase                             | prot_ID_743        | AN11028       |         |
| AN11031.3        | 2              | 521           | conserved hypothetical protein             |                 | Transmembrane transporter                  | prot_ID_1094       | AN11031       |         |
| AN7883.3         | 1              | 1099          | conserved hypothetical protein             |                 | Protein of unknown function                | prot_ID_811        | AN7883        |         |
| <b>AN7884.3</b>  | 0              | 0             | nonribosomal peptide synthase              |                 | Nonribosomal peptide synthase              | <b>prot_ID_212</b> | <b>AN7884</b> | ECS, EP |
| n/a              |                |               |                                            |                 | Protein of unknown function                | prot_ID_951        | AN7885        |         |
| n/a              |                |               |                                            |                 | Class V chitinase                          | prot_ID_339        | AN7886        |         |
| n/a              |                |               |                                            |                 | Protein of unknown function                | prot_ID_1085       | AN7887        |         |
| n/a              |                |               |                                            |                 | Protein of unknown function                | prot_ID_467        | AN7888        |         |
| n/a              |                |               |                                            |                 | Dioxygenase                                | prot_ID_1397       | AN12002       |         |
| n/a              |                |               |                                            |                 | Protein of unknown function                | prot_ID_1213       | AN7889        |         |
| n/a              |                |               |                                            |                 | Glucose oxidase                            | prot_ID_79         | AN7890        |         |
| n/a              |                |               |                                            |                 | Beta-1,4-endoglucanase                     | prot_ID_809        | AN7891        |         |
| n/a              |                |               |                                            |                 | Small heat-shock protein                   | prot_ID_209        | AN7892        |         |

# AN8105 cluster

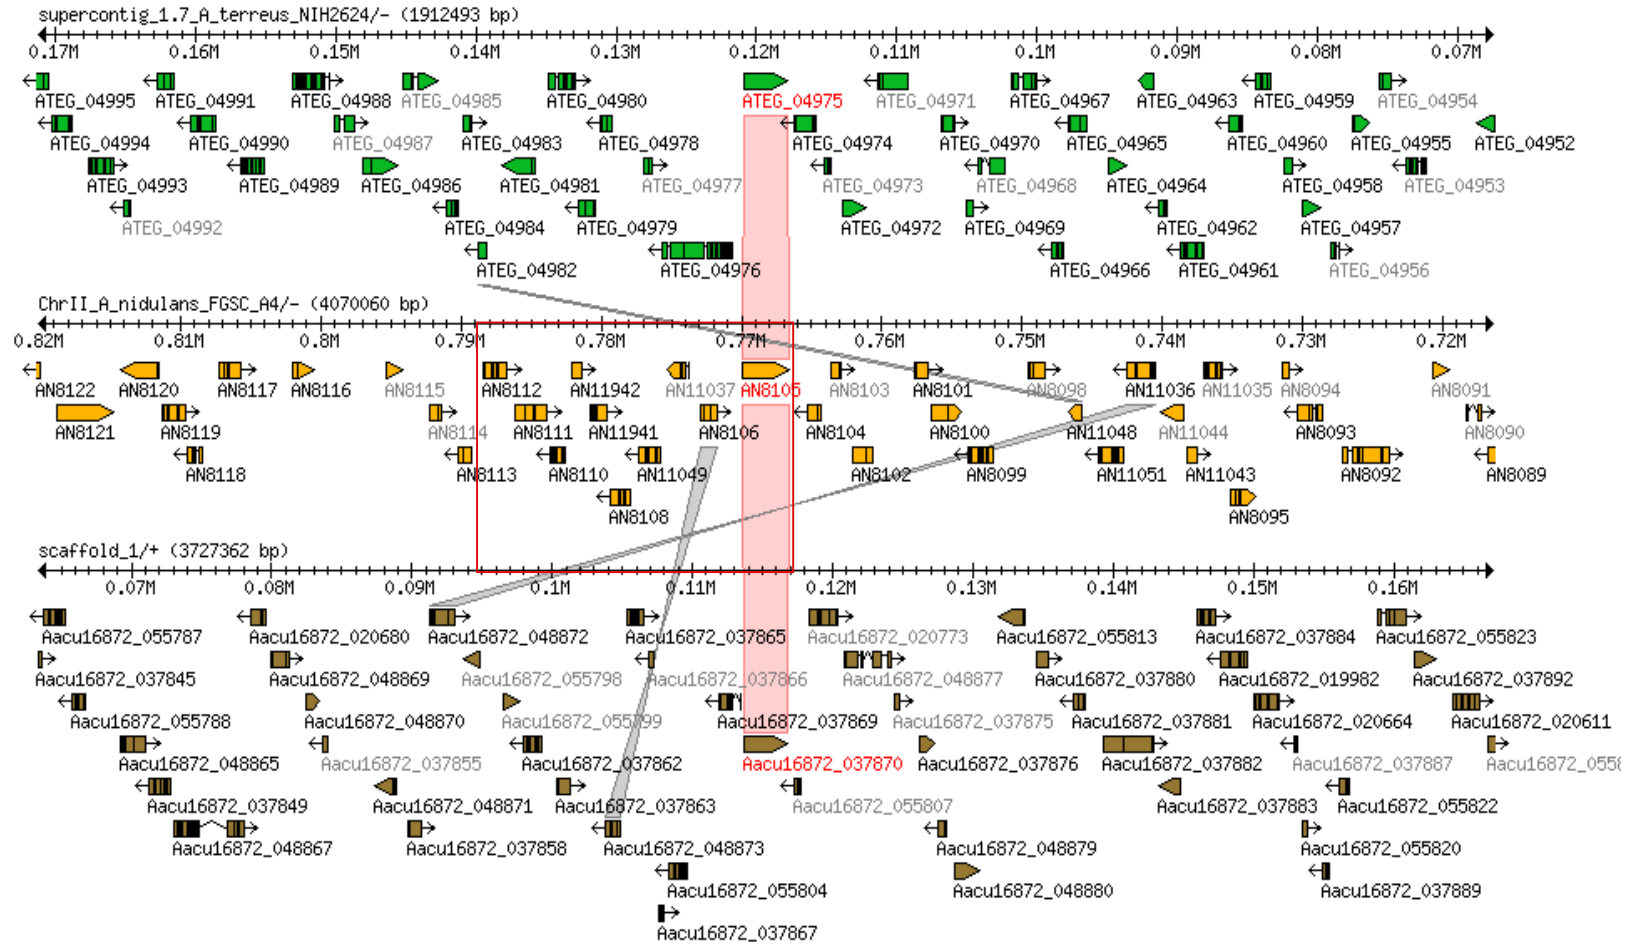

**AN8105 cluster**

| Gene id (SMURF)* | Gene positions | Gene distance | Annotated_gene_function (SMURF) | AspGD gene name | AspGD manual annotation and notes       | antiSMASH ID      | Gene ID       |         |
|------------------|----------------|---------------|---------------------------------|-----------------|-----------------------------------------|-------------------|---------------|---------|
| n/a              |                |               |                                 |                 | Protein of unknown function             | prot_ID_553       | AN8098        |         |
| n/a              |                |               |                                 |                 | Oxalate decarboxylase                   | prot_ID_1302      | AN8099        |         |
| n/a              |                |               |                                 |                 | Solute:hydrogen antiporter              | prot_ID_432       | AN8100        |         |
| n/a              |                |               |                                 |                 | Transcription factor                    | prot_ID_1178      | AN8101        |         |
| n/a              |                |               |                                 |                 | Pepsin-like aspartic protease           | prot_ID_563       | AN8102        |         |
| AN8103.3         | 2              | 361           | conserved hypothetical protein  |                 | Zn(II)2Cys6 transcription factor        | prot_ID_1315      | AN8103        |         |
| AN8104.3         | 1              | 1361          | conserved hypothetical protein  |                 | RTA1 domain protein                     | prot_ID_696       | AN8104        |         |
| <b>AN8105.3</b>  | 0              | 0             | NRPS-like enzyme                |                 | <b>NRPS-like enzyme</b>                 | <b>prot_ID_90</b> | <b>AN8105</b> | ECS, EP |
| AN8106.3         | -1             | 1967          | conserved hypothetical protein  |                 | <b>Dioxygenase</b>                      | prot_ID_823       | AN8106        |         |
| AN11037.3        | -2             | 1133          | conserved hypothetical protein  |                 | <b>Transmembrane transporter</b>        | prot_ID_134       | AN11037       |         |
| AN11049.3        | -3             | 329           | conserved hypothetical protein  |                 | <b>Protein of unknown function</b>      | prot_ID_391       | AN11049       |         |
| AN8108.3         | -4             | 806           | conserved hypothetical protein  |                 | <b>Fumarylacetoacetase</b>              | prot_ID_964       | AN8108        |         |
| AN8109.3         | -5             | 120           | conserved hypothetical protein  |                 | <b>Deleted ORF</b>                      |                   |               |         |
| n/a              |                |               |                                 |                 | <b>L-iditol 2-dehydrogenase</b>         | prot_ID_1373      | AN11941       |         |
| n/a              |                |               |                                 |                 | <b>Predicted ATPase</b>                 | prot_ID_1385      | AN11942       |         |
| AN8110.3         | -6             | 247           | conserved hypothetical protein  |                 | <b>Oxidoreductase</b>                   | prot_ID_562       | AN8110        |         |
| AN8111.3         | -7             | 117           | conserved hypothetical protein  |                 | <b>Zn(II)2Cys6 transcription factor</b> | prot_ID_1314      | AN8111        |         |
| AN8112.3         | -8             | 457           | conserved hypothetical protein  |                 | <b>Transmembrane transporter</b>        | prot_ID_695       | AN8112        | EP      |
| AN8113.3         | -9             | 895           | conserved hypothetical protein  |                 | Oxidoreductase                          | prot_ID_89        | AN8113        |         |
| n/a              |                |               |                                 |                 | Protein of unknown function             | n/a               | AN8114        |         |
| n/a              |                |               |                                 |                 | Protein of unknown function             | n/a               | AN8115        |         |

# AN8142 cluster

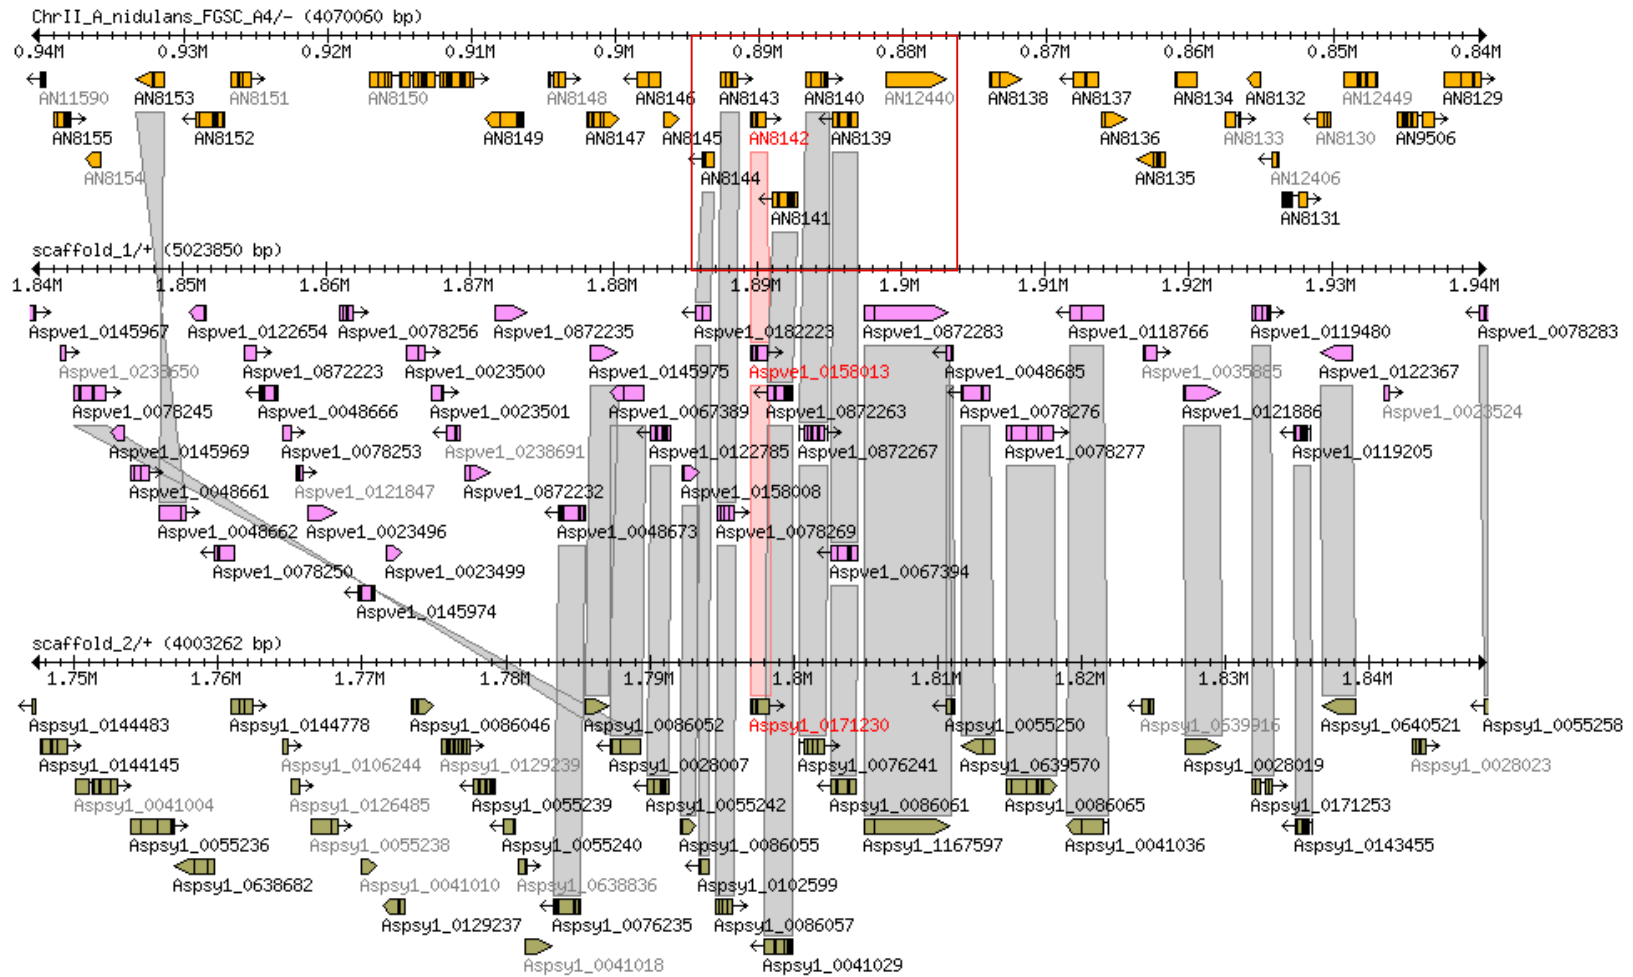



**AN8142 cluster**

| Gene id (SMURF)* | Gene positions | Gene distance | Annotated_gene_function (SMURF) | AspGD gene name | AspGD manual annotation and notes                                                                                                                      | antiSMASH ID | Gene ID |     |
|------------------|----------------|---------------|---------------------------------|-----------------|--------------------------------------------------------------------------------------------------------------------------------------------------------|--------------|---------|-----|
| n/a              |                |               |                                 |                 | Protein of unknown function                                                                                                                            | prot_ID_344  | AN8133  |     |
| n/a              |                |               |                                 |                 | Acyl transferase                                                                                                                                       | prot_ID_1090 | AN8134  |     |
| n/a              |                |               |                                 |                 | Hexosyl transferase                                                                                                                                    | prot_ID_471  | AN8135  |     |
| n/a              |                |               |                                 |                 | Protein of unknown function                                                                                                                            | prot_ID_1219 | AN8136  |     |
| n/a              |                |               |                                 |                 | Alcohol O-acetyltransferase                                                                                                                            | prot_ID_600  | AN8137  |     |
| n/a              |                |               |                                 | aglC            | Alpha-galactosidase, ACP phosphopantetheine attachment site binding, fatty acid biosynthetic process, phosphopantetheine binding, transferase activity | prot_ID_2    | AN8138  |     |
| n/a              |                |               |                                 |                 |                                                                                                                                                        | prot_ID_1358 | AN12440 | FA  |
| n/a              |                |               |                                 | CYP652A1        | Cytochrome P450 Monooxygenase                                                                                                                          | prot_ID_730  | AN8139  |     |
| n/a              |                |               |                                 |                 |                                                                                                                                                        | prot_ID_956  | AN8140  |     |
| n/a              |                |               |                                 | CYP5073A1       | Cytochrome P450 UbiA-like prenyltransferase Geranylgeranyl pyrophosphate synthetase AtmG                                                               | prot_ID_342  | AN8141  |     |
| n/a              |                |               |                                 |                 |                                                                                                                                                        | prot_ID_1089 | AN8142  |     |
| n/a              |                |               |                                 |                 | Protein of unknown function                                                                                                                            | prot_ID_470  | AN8143  |     |
| n/a              |                |               |                                 |                 |                                                                                                                                                        | prot_ID_1217 | AN8144  | ECS |
| n/a              |                |               |                                 |                 | DUF985 domain protein                                                                                                                                  | prot_ID_599  | AN8145  |     |
| n/a              |                |               |                                 |                 | Protein of unknown function                                                                                                                            | prot_ID_1350 | AN8146  |     |
| n/a              |                |               |                                 |                 | Protein of unknown function                                                                                                                            | prot_ID_729  | AN8147  |     |



**AN8209 cluster**

| Gene id (SMURF)* | Gene positions | Gene distance | Annotated_gene_function (SMURF) | AspGD gene name | AspGD manual annotation and notes                 | antiSMASH ID       | Gene ID       |         |
|------------------|----------------|---------------|---------------------------------|-----------------|---------------------------------------------------|--------------------|---------------|---------|
| n/a              |                |               |                                 |                 | Protein of unknown function                       | n/a                | AN11597       |         |
| n/a              |                |               |                                 |                 | Protein of unknown function                       | n/a                | AN8200        |         |
| n/a              |                |               |                                 |                 | DNA helicase                                      | n/a                | AN8201        |         |
| n/a              |                |               |                                 |                 | Protein of unknown function                       | prot_ID_781        | AN8202        |         |
| n/a              |                |               |                                 |                 | NAD+ synthase                                     | prot_ID_174        | AN8203        |         |
| n/a              |                |               |                                 |                 | NAD+ diphosphatase                                | prot_ID_915        | AN8204        |         |
| n/a              |                |               |                                 |                 | Protein of unknown function                       | prot_ID_302        | AN8205        |         |
| n/a              |                |               |                                 |                 | Protein of unknown function                       | prot_ID_1050       | AN8206        |         |
| n/a              |                |               |                                 |                 | Protein of unknown function                       | prot_ID_430        | AN8207        |         |
| n/a              |                |               |                                 |                 | Protein of unknown function                       | prot_ID_1177       | AN8208        |         |
| n/a              |                |               |                                 | wA              | Polyketide synthase, dark green pigment formation | <b>prot_ID_560</b> | <b>AN8209</b> | ECS, EP |
| n/a              |                |               |                                 |                 | Deleted; gene split to form AN12403 and AN12404   | n/a                |               |         |
| n/a              |                |               |                                 |                 | Protein of unknown function                       | prot_ID_1360       | AN12403       |         |
| n/a              |                |               |                                 |                 | Protein of unknown function                       | prot_ID_1437       | AN12404       | EP      |
| n/a              |                |               |                                 |                 | Histone demethylase                               | prot_ID_172        | AN8211        |         |
| n/a              |                |               |                                 |                 | GIY-YIG catalytic domain containing protein       | prot_ID_914        | AN8212        |         |
| n/a              |                |               |                                 |                 | dTMP kinase                                       | prot_ID_301        | AN8213        |         |
| n/a              |                |               |                                 |                 | tRNA-guanine transglycosylase family protein      | prot_ID_1048       | AN8214        |         |

## AN8249 cluster

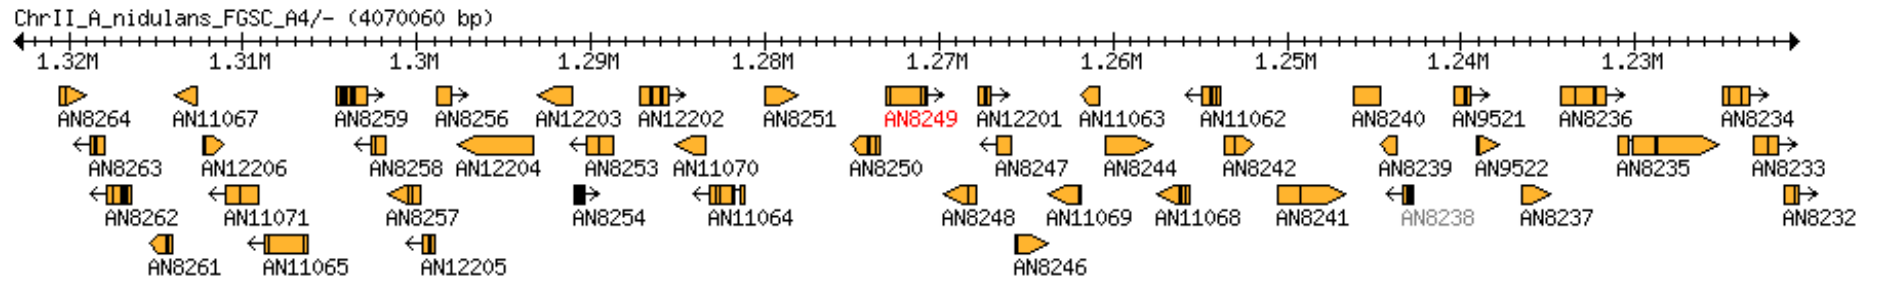

**AN8249 cluster**

| Gene id (SMURF)* | Gene positions | Gene distance | Annotated_gene_function (SMURF) | AspGD gene name | AspGD manual annotation and notes                                 | antiSMASH ID | Gene ID       |
|------------------|----------------|---------------|---------------------------------|-----------------|-------------------------------------------------------------------|--------------|---------------|
| n/a              |                |               |                                 |                 | Class III chitinase                                               | prot_ID_259  | AN11063       |
| n/a              |                |               |                                 | srpA            | Signal recognition particle protein                               | prot_ID_208  | AN8246        |
| n/a              |                |               |                                 |                 | DUF1665 domain protein                                            | prot_ID_950  | AN8247        |
| n/a              |                |               |                                 |                 | Oxidoreductase                                                    | prot_ID_1402 | AN12201       |
| n/a              |                |               |                                 |                 | Mitochondrial fusion protein 2,3-oxidosqualene-lanosterol cyclase | prot_ID_336  | AN8248        |
| n/a              |                |               |                                 |                 |                                                                   | prot_ID_1083 | <b>AN8249</b> |
| n/a              |                |               |                                 | CYP647A1        | Cytochrome P450                                                   | prot_ID_1299 | AN8250        |
| n/a              |                |               |                                 | hapX            | bZIP transcription factor                                         | prot_ID_682  | AN8251        |
| n/a              |                |               |                                 | agnD            | Alpha-1,3-glucanase                                               | prot_ID_1008 | AN11064       |
| n/a              |                |               |                                 |                 | Protein of unknown function                                       | prot_ID_653  | AN11069       |

## AN504 cluster

No orthologs for AN504, used AN502 to generate cluster image

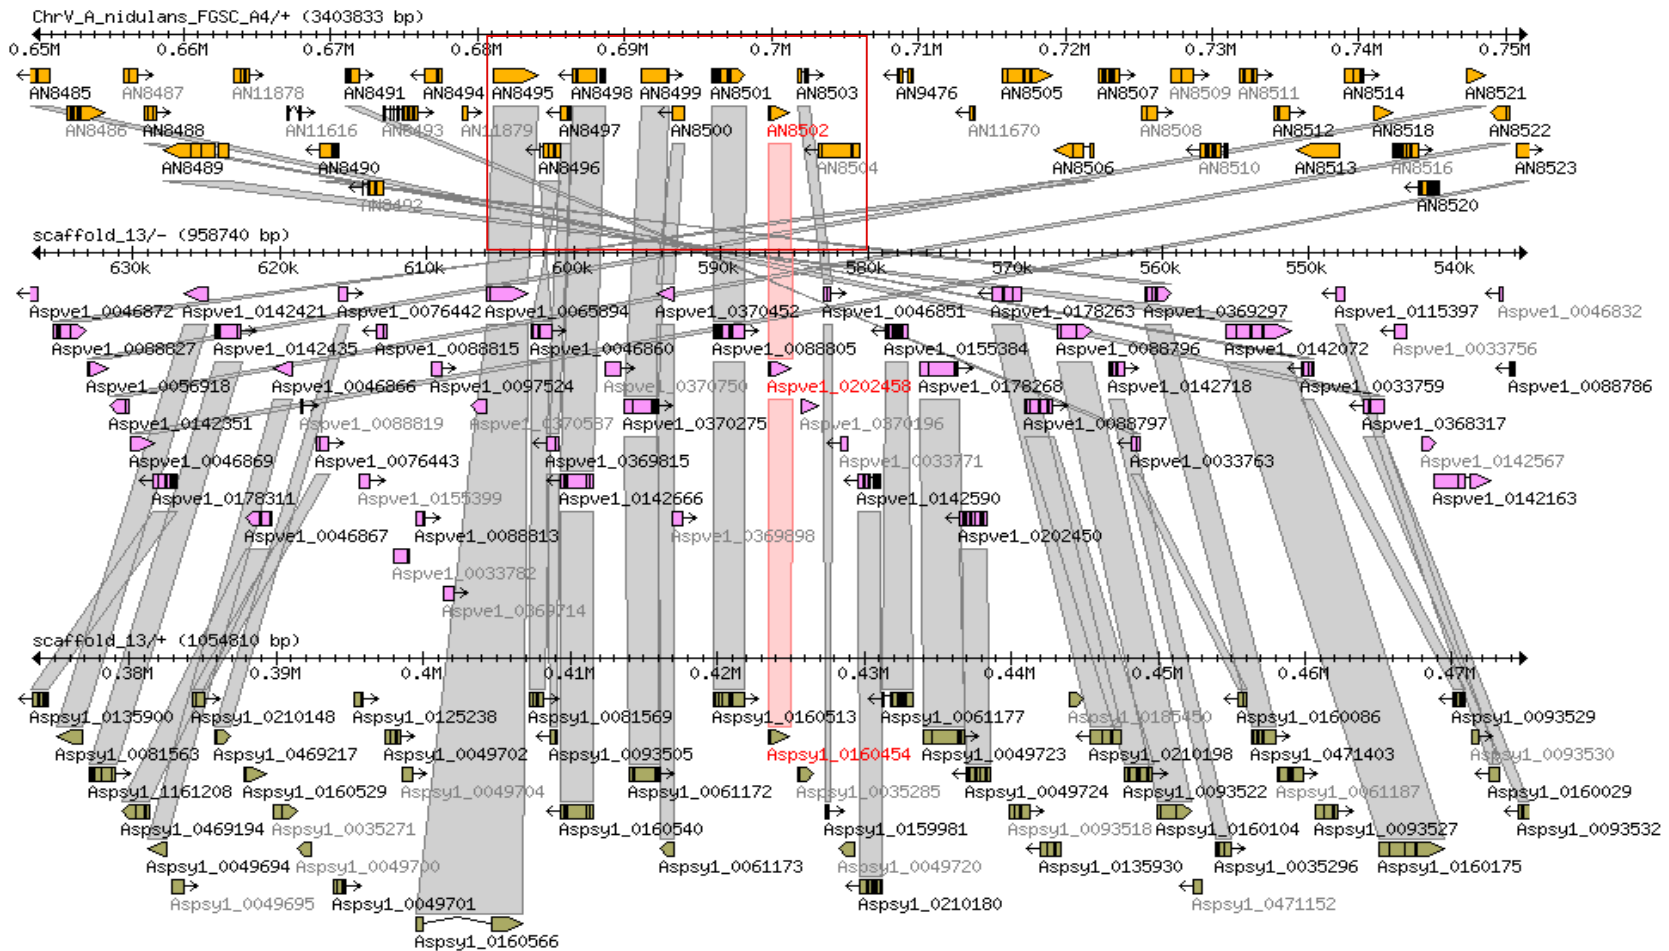

**AN8504 cluster**

| Gene id (SMURF)* | Gene positions | Gene distance | Annotated_gene_function (SMURF) | AspGD gene name | AspGD manual annotation and notes        | antiSMASH ID | Gene ID       |     |
|------------------|----------------|---------------|---------------------------------|-----------------|------------------------------------------|--------------|---------------|-----|
| n/a              |                |               |                                 |                 | DUF1212 domain membrane protein          | prot_ID_432  | AN8495        | ECS |
| n/a              |                |               |                                 |                 | Class II aldolase/adducin domain protein | prot_ID_990  | AN8496        |     |
| n/a              |                |               |                                 |                 | Carbon-sulfur lyase                      | prot_ID_532  | AN8497        |     |
| n/a              |                |               |                                 |                 | Proteinase                               | prot_ID_56   | AN8498        |     |
| n/a              |                |               |                                 |                 | Siderochrome-iron transporter            | prot_ID_628  | AN8499        |     |
| n/a              |                |               |                                 |                 | Protein of unknown function              | prot_ID_1002 | AN8500        |     |
| n/a              |                |               |                                 |                 | Protein of unknown function              | prot_ID_545  | AN8501        |     |
| n/a              |                |               |                                 |                 | Transmembrane transporter                | prot_ID_70   | AN8502        |     |
| n/a              |                |               |                                 |                 | Protein of unknown function              | prot_ID_642  | AN8503        |     |
| n/a              |                |               |                                 |                 | Nonribosomal peptide synthase            | prot_ID_167  | <b>AN8504</b> | FA  |
| n/a              |                |               |                                 |                 | Protein of unknown function              | prot_ID_2    | AN9476        |     |
| n/a              |                |               |                                 |                 | Protein of unknown function              | prot_ID_630  | AN11670       |     |
| n/a              |                |               |                                 |                 | Protein of unknown function              | prot_ID_738  | AN8505        |     |
| n/a              |                |               |                                 |                 | Zn(II)2Cys6 transcription factor         | prot_ID_271  | AN8506        |     |
| n/a              |                |               |                                 |                 | Transmembrane transporter                | prot_ID_838  | AN8507        |     |
| n/a              |                |               |                                 |                 | Protein of unknown function              | prot_ID_374  | AN8508        |     |

## AN8910 cluster

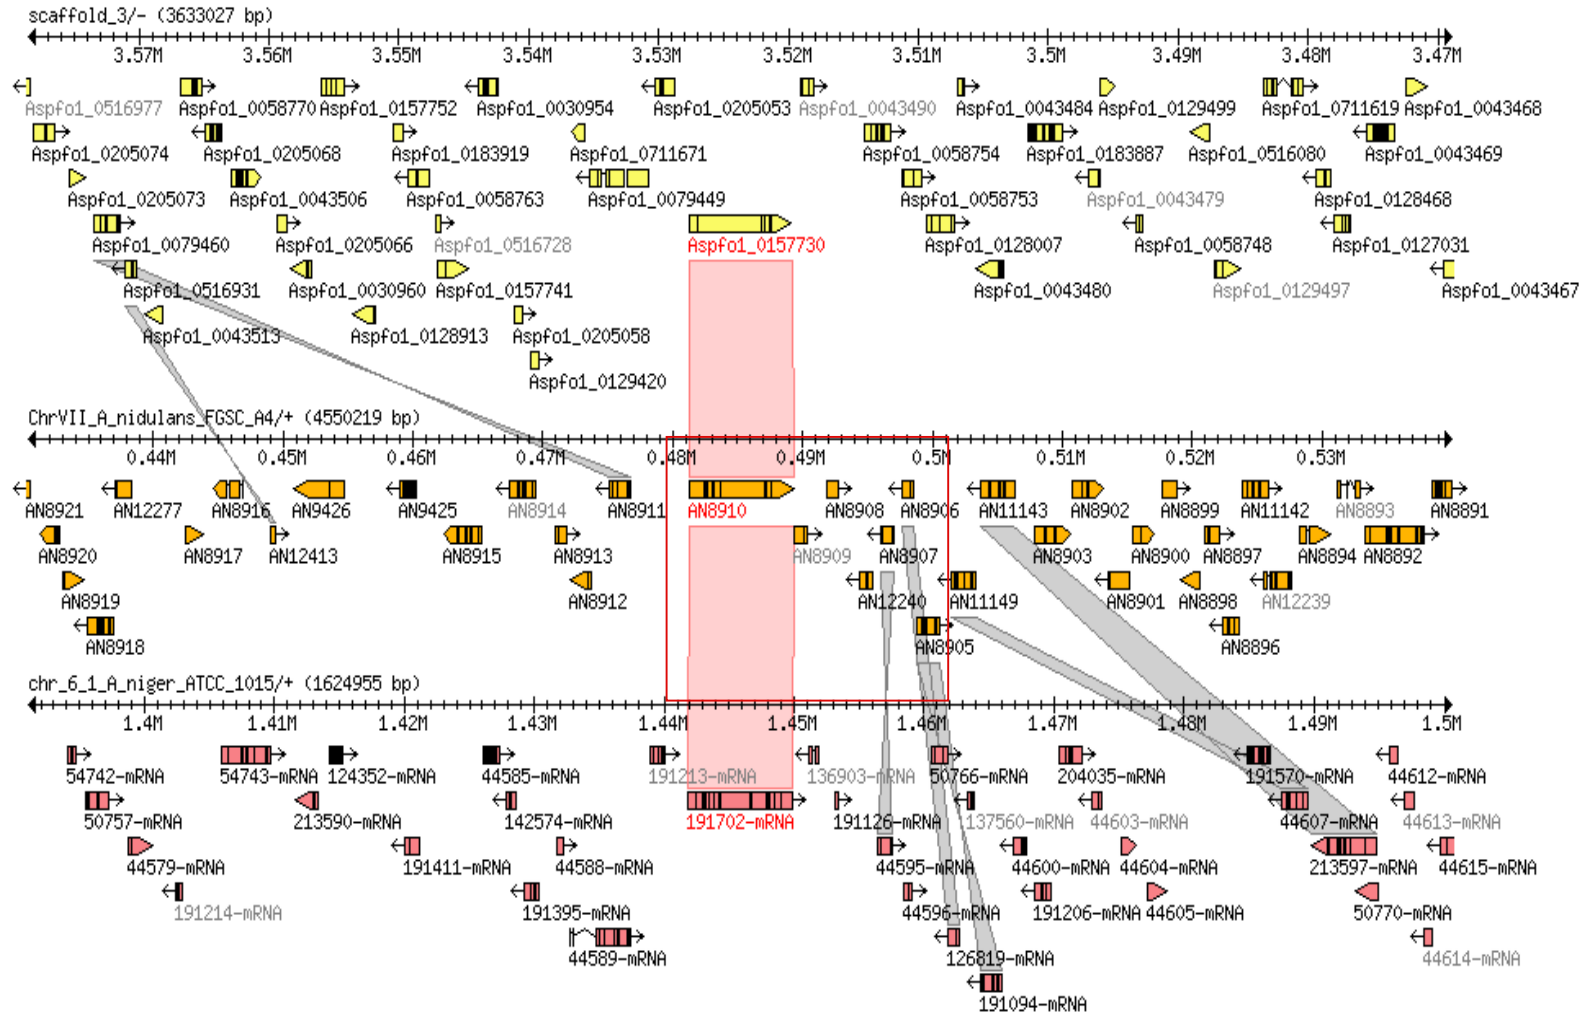



**AN8910 cluster**

| Gene id (SMURF)* | Gene positions | Gene distance | Annotated_gene_function (SMURF) | AspGD gene name | AspGD manual annotation and notes                   | antiSMASH ID        | Gene ID       |     |
|------------------|----------------|---------------|---------------------------------|-----------------|-----------------------------------------------------|---------------------|---------------|-----|
| AN8901.3         | 10             | 316           | conserved hypothetical protein  |                 |                                                     | n/a                 |               |     |
| AN8902.3         | 9              | 428           | conserved hypothetical protein  |                 |                                                     | n/a                 |               |     |
| AN8903.3         | 8              | 2432          | conserved hypothetical protein  |                 | Peptide transporter                                 | prot_ID_353         | AN8903        |     |
| AN11143.3        | 7              | 363           | conserved hypothetical protein  | glaA            | Glucoamylase                                        | prot_ID_246         | AN11143       |     |
| AN11149.3        | 6              | 868           | conserved hypothetical protein  |                 | Arylsulfatase                                       | prot_ID_679         | AN11149       |     |
| AN8905.3         | 5              | 285           | conserved hypothetical protein  |                 | Cytochrome P450                                     | prot_ID_497         | AN8905        | ECS |
| AN8906.3         | 4              | 502           | conserved hypothetical protein  |                 | Protein of unknown function                         | prot_ID_1313        | AN8906        |     |
| AN8907.3         | 3              | 3264          | conserved hypothetical protein  |                 | C-4 sterol methyl oxidase                           | prot_ID_640         | AN8907        |     |
| n/a              |                |               |                                 |                 | Protein of unknown function                         | prot_ID_1507        | AN12240       |     |
| AN8908.3         | 2              | 1360          | conserved hypothetical protein  |                 | Protein of unknown function                         | prot_ID_1455        | AN8908        |     |
| AN8909.3         | 1              | 338           | conserved hypothetical protein  |                 | Protein of unknown function                         | prot_ID_788         | AN8909        |     |
| <b>AN8910.3</b>  | 0              | 0             | polyketide synthase             |                 | polyketide synthase                                 | <b>prot_ID_1021</b> | <b>AN8910</b> | ECS |
| n/a              |                |               |                                 |                 | Transmembrane transporter                           | prot_ID_350         | AN8911        |     |
| n/a              |                |               |                                 |                 | Myo-inositol transporter                            | prot_ID_1164        | AN8912        |     |
| n/a              |                |               |                                 |                 | Glycosylphosphatidylinositol (GPI)-anchored protein | prot_ID_494         | AN8913        |     |
| n/a              |                |               |                                 |                 | Protein of unknown function                         | prot_ID_1310        | AN8914        |     |
| n/a              |                |               |                                 |                 | Transmembrane transporter                           | prot_ID_637         | AN8915        |     |

# AN9005 cluster

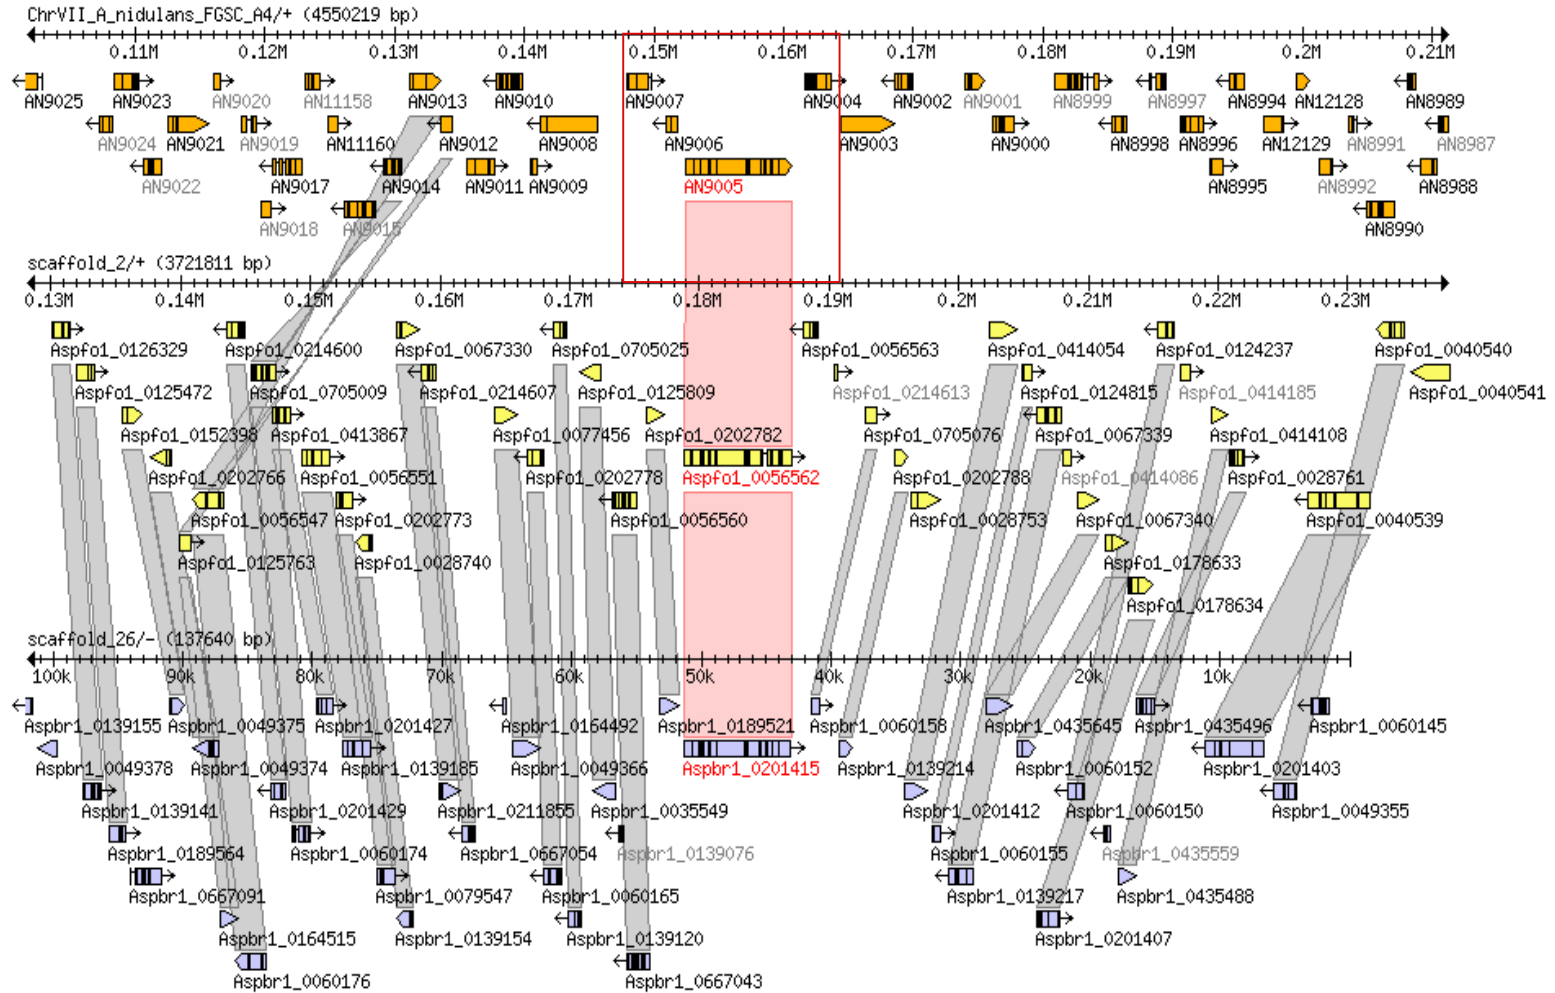

**AN9005 cluster**

| Gene id (SMURF)* | Gene positions | Gene distance | Annotated_gene_function (SMURF)             | AspGD gene name | AspGD manual annotation and notes                     | antiSMASH ID | Gene ID |    |
|------------------|----------------|---------------|---------------------------------------------|-----------------|-------------------------------------------------------|--------------|---------|----|
| n/a              |                |               |                                             |                 | Transmembrane transporter                             | prot_ID_591  | AN9000  |    |
| n/a              |                |               |                                             |                 | Protein of unknown function                           | prot_ID_1408 | AN9001  |    |
| AN9002.3         | 3              | 10            | conserved hypothetical protein              |                 | Oxidoreductase                                        | prot_ID_737  | AN9002  |    |
| AN9003.3         | 2              | 737           | conserved hypothetical protein              |                 | Aspartic-type endopeptidase                           | prot_ID_67   | AN9003  |    |
| AN9004.3         | 1              | 1173          | conserved hypothetical protein              |                 | <b>Monoxygenase</b>                                   | prot_ID_883  | AN9004  | EP |
| <b>AN9005.3</b>  | 0              | 0             | polyketide synthase                         |                 | <b>Polyketide synthase</b>                            | prot_ID_208  | AN9005  |    |
| AN9006.3         | -1             | 739           | conserved hypothetical protein              |                 | <b>Protein of unknown function</b>                    | prot_ID_1028 | AN9006  |    |
| AN9007.3         | -2             | 1425          | conserved hypothetical protein              | <b>CYP548D1</b> | <b>Cytochrome P450</b>                                | prot_ID_358  | AN9007  | EP |
| AN9008.3         | -3             | 2562          | hypothetical protein similar to phytochrome | fphA            | Phytochrome photoreceptor                             | prot_ID_1170 | AN9008  |    |
| AN9009.3         | -4             | 67            | conserved hypothetical protein              |                 | Protein of unknown function                           | prot_ID_503  | AN9009  |    |
| AN9010.3         | -5             | 665           | hypothetical protein                        |                 | Nicotinamide mononucleotide transmembrane transporter | prot_ID_736  | AN9010  |    |
| AN9011.3         | -6             | 125           | conserved hypothetical protein              |                 | Aryl-alcohol oxidase-related protein                  | prot_ID_66   | AN9011  |    |
| AN9012.3         | -7             | 1297          | conserved hypothetical protein              |                 | Lyase                                                 | prot_ID_881  | AN9012  |    |
| AN9013.3         | -8             | 175           | conserved hypothetical protein              |                 | Zn(II)2Cys6 transcription factor                      | prot_ID_206  | AN9013  |    |

## AN9129 Cluster

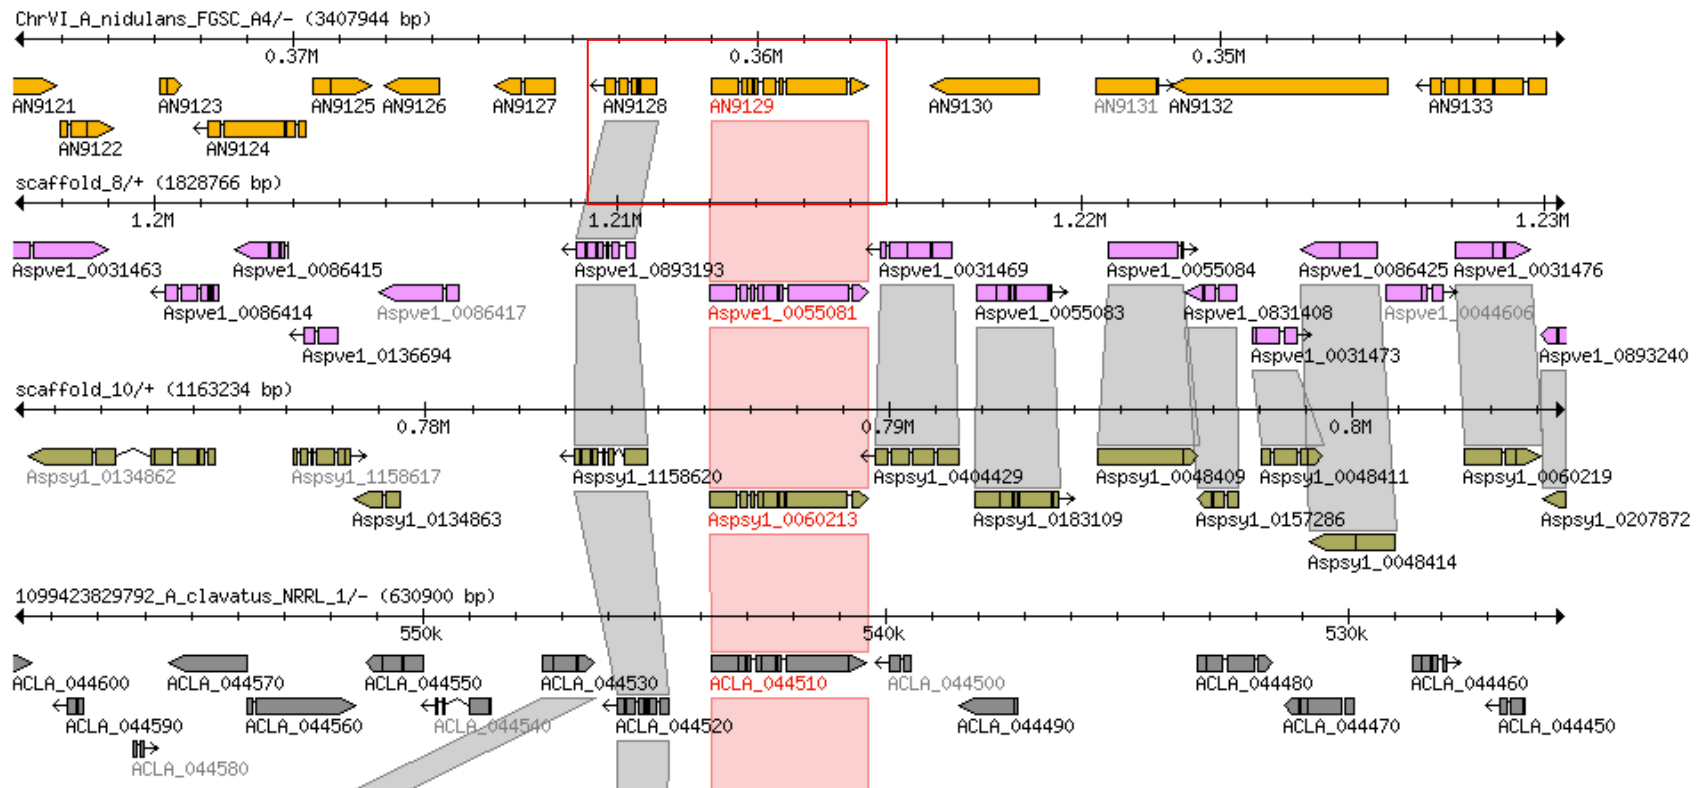

**AN9129 cluster**

| Gene id (SMURF)* | Gene positions | Gene distance | Annotated_gene_function (SMURF) | AspGD gene name | AspGD manual annotation and notes                                   | antiSMASH ID | Gene ID |         |
|------------------|----------------|---------------|---------------------------------|-----------------|---------------------------------------------------------------------|--------------|---------|---------|
| n/a              |                |               |                                 |                 | NRPS-like enzyme<br>enoyl-CoA hydratase/isomerase<br>family protein | n/a          | AN9129  | ECS, EP |
| n/a              |                |               |                                 |                 |                                                                     | n/a          | AN9130  | ECS     |

## AN9226 cluster

Possible overlapping clusters, AN9226 lacks orthologs so AN9227 was used to generate cluster image

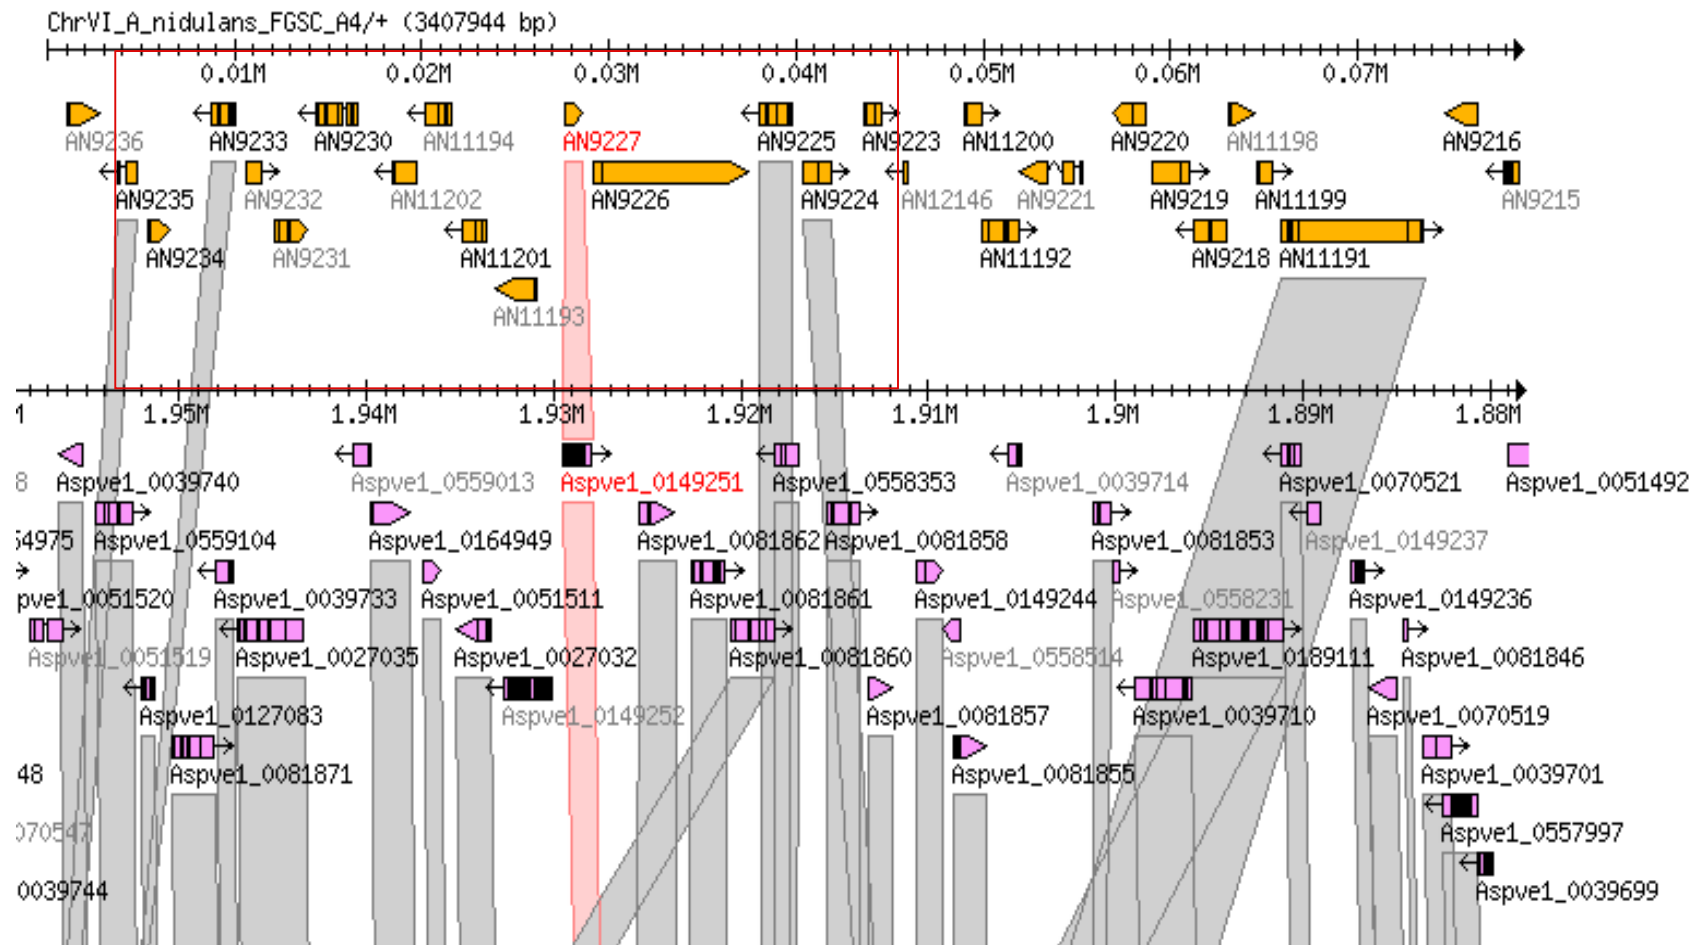

**AN9226 cluster**

| Gene id (SMURF)* | Gene positions | Gene distance | Annotated_gene_function (SMURF)       | AspGD gene name | AspGD manual annotation and notes                                                                       | antiSMASH ID       | Gene ID       |    |
|------------------|----------------|---------------|---------------------------------------|-----------------|---------------------------------------------------------------------------------------------------------|--------------------|---------------|----|
| n/a              |                |               |                                       |                 | Protein of unknown function                                                                             | n/a                | AN9215        |    |
| n/a              |                |               |                                       |                 | Protein of unknown function                                                                             | n/a                | AN9216        |    |
| n/a              |                |               |                                       |                 | polyketide synthase                                                                                     | n/a                | AN11191       |    |
| n/a              |                |               |                                       |                 | Dihydrofolate reductase                                                                                 | n/a                | AN11199       |    |
| n/a              |                |               |                                       |                 | Oxidoreductase                                                                                          | n/a                | AN11198       |    |
| n/a              |                |               |                                       |                 | Sterol 14-demethylase                                                                                   | n/a                | AN9218        |    |
| n/a              |                |               |                                       |                 | Transmembrane transporter                                                                               | n/a                | AN9219        |    |
| n/a              |                |               |                                       |                 | Protein of unknown function                                                                             | prot_ID_1014       | AN9220        |    |
| n/a              |                |               |                                       |                 | Zn(II)2Cys6 transcription factor                                                                        | prot_ID_511        | AN9221        |    |
| n/a              |                |               |                                       | CYP664A1        | Cytochrome P450                                                                                         | prot_ID_108        | AN11192       |    |
| n/a              |                |               |                                       |                 | Protein of unknown function                                                                             | prot_ID_329        | AN11200       |    |
| n/a              |                |               |                                       |                 | Protein of unknown function                                                                             | prot_ID_1129       | AN12146       |    |
| AN9223.3         | 3              | 1736          | conserved hypothetical protein        |                 | <b>Demethylsterigmatocystin 6-O-methyltransferase</b>                                                   | prot_ID_620        | AN9223        | EP |
| AN9224.3         | 2              | 633           | conserved hypothetical protein        |                 | <b>Monooxygenase</b>                                                                                    | prot_ID_133        | AN9224        |    |
| AN9225.3         | 1              | 563           | conserved hypothetical protein        | CYP679A1        | <b>Cytochrome P450</b>                                                                                  | prot_ID_726        | AN9225        |    |
| <b>AN9226.3</b>  | 0              | 0             | nonribosomal peptide synthase         |                 | <b>Nonribosomal peptide synthase</b>                                                                    | <b>prot_ID_231</b> | <b>AN9226</b> |    |
| AN9227.3         | -1             | 1045          | conserved hypothetical protein        |                 | <b>Dioxygenase</b><br><b>Domain(s) with predicted oxygen transporter activity and role in transport</b> | prot_ID_832        | AN9227        |    |
| AN11193.3        | -2             | 616           | conserved hypothetical protein        |                 |                                                                                                         | prot_ID_698        | AN11193       |    |
| AN11201.3        | -3             | 429           | conserved hypothetical protein        |                 | <b>Oxidoreductase</b>                                                                                   | prot_ID_933        | AN11201       |    |
| AN11194.3        | -4             | 611           | DMATS type aromatic prenyltransferase |                 | <b>DMATS-type aromatic prenyltransferase</b>                                                            | prot_ID_210        | AN11194       |    |
| AN11202.3        | -5             | 363           | DMATS type aromatic prenyltransferase |                 | <b>DMATS-type aromatic prenyltransferase</b>                                                            | prot_ID_438        | AN11202       |    |
| AN9230.3         | -6             | 1866          | conserved hypothetical protein        |                 | <b>Monooxygenase</b>                                                                                    | prot_ID_18         | AN9230        |    |
| AN9231.3         | -7             | 208           | conserved hypothetical protein        |                 | <b>UDP-N-acetylmuramate dehydrogenase</b>                                                               | prot_ID_617        | AN9231        |    |
| AN9232.3         | -8             | 666           | conserved hypothetical protein        |                 | <b>Oxidoreductase</b>                                                                                   | prot_ID_129        | AN9232        |    |

|          |     |      |                                |                                  |             |        |    |
|----------|-----|------|--------------------------------|----------------------------------|-------------|--------|----|
| AN9233.3 | -9  | 406  | conserved hypothetical protein | O-methyltransferase              | prot_ID_724 | AN9233 |    |
| AN9234.3 | -10 | 2320 | conserved hypothetical protein | Oxidoreductase                   | prot_ID_227 | AN9234 | EP |
| AN9235.3 | -11 | 638  | conserved hypothetical protein | Isochorismatase family hydrolase | prot_ID_830 | AN9235 |    |
| AN9236.3 | -12 | 895  | conserved hypothetical protein | Zn(II)2Cys6 transcription factor | prot_ID_336 | AN9236 |    |



## AN9291 (AN11820) cluster

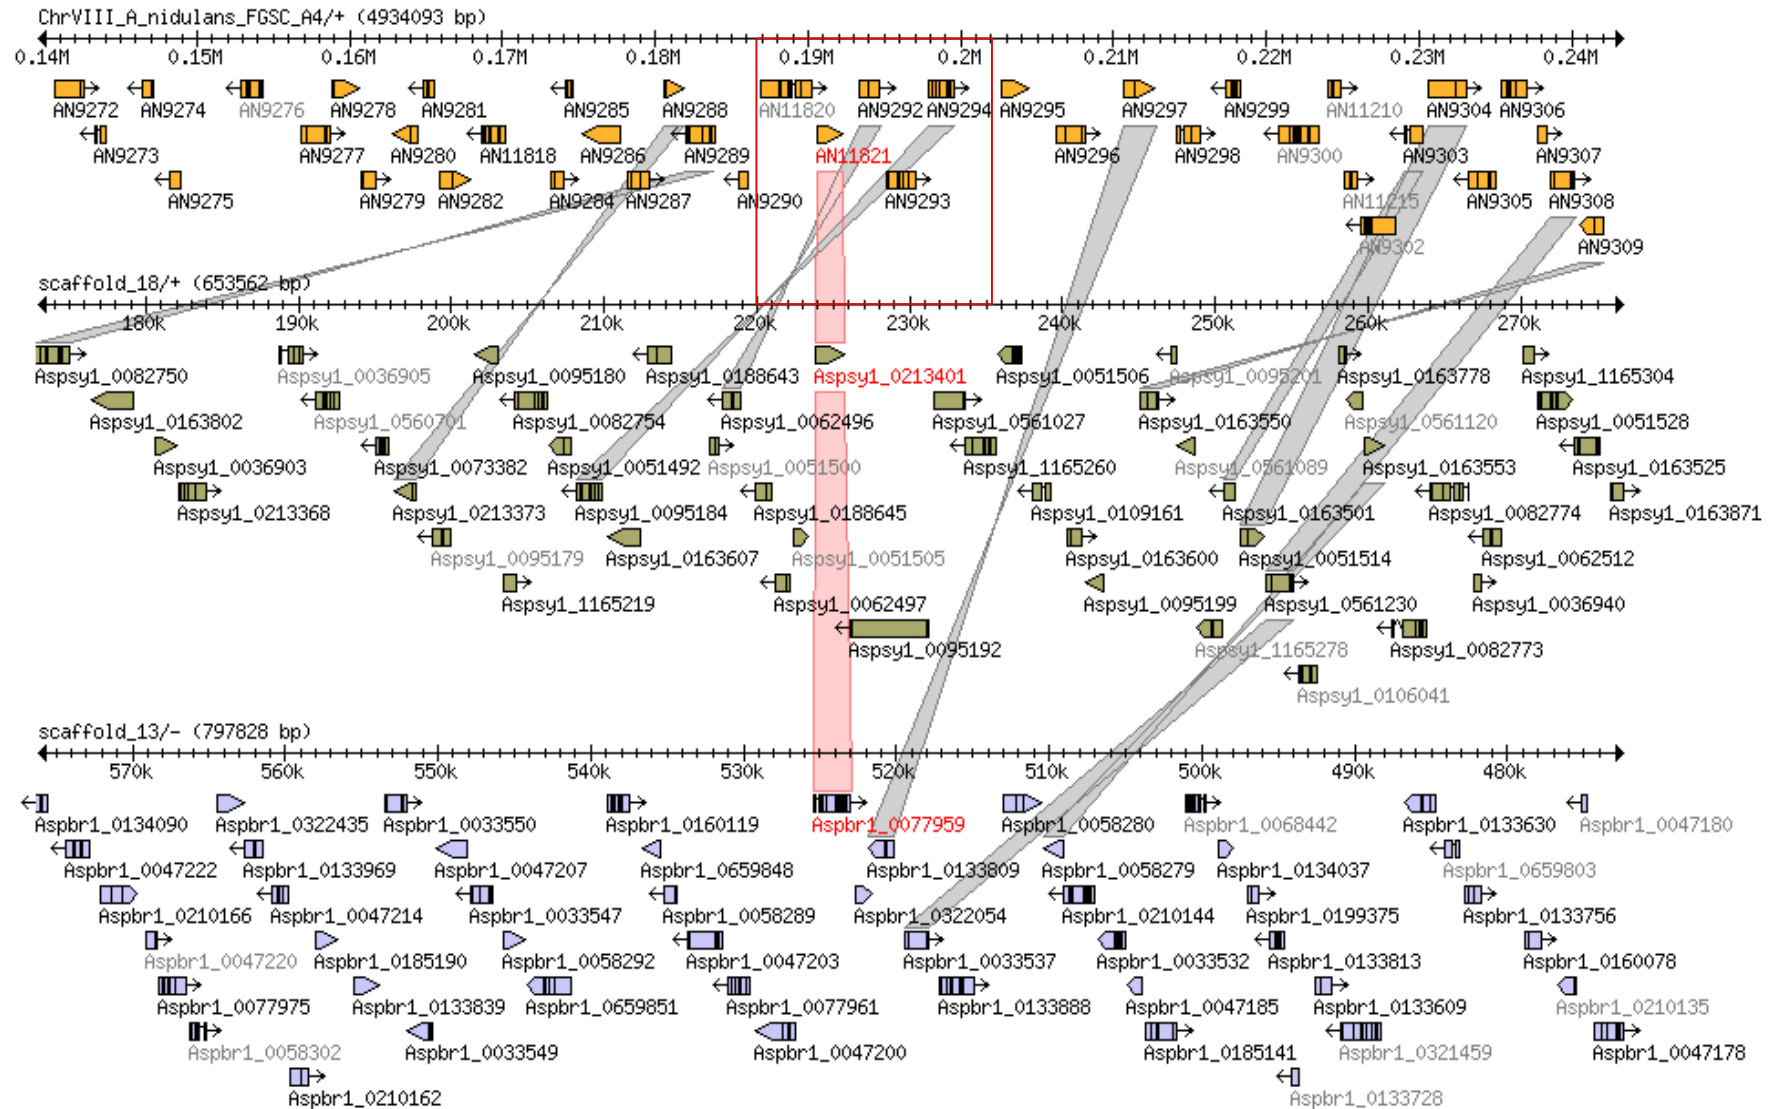

**AN9291 cluster**

| Gene id (SMURF)* | Gene positions | Gene distance | Annotated_gene_function (SMURF)  | AspGD gene name | AspGD manual annotation and notes                        | antiSMASH ID | Gene ID           |
|------------------|----------------|---------------|----------------------------------|-----------------|----------------------------------------------------------|--------------|-------------------|
| AN9280.3         | 11             | 354           | conserved hypothetical protein   |                 | Transmembrane transporter                                | n/a          | AN9280            |
| AN9281.3         | 10             | 364           | conserved hypothetical protein   |                 | Protein of unknown function                              | n/a          | AN9281            |
| AN9282.3         | 9              | 738           | conserved hypothetical protein   |                 | N,N-dimethylaniline monooxygenase                        | n/a          | AN9282            |
| AN9283.3         | 8              | 320           | conserved hypothetical protein   |                 | Possible pseudogene                                      | n/a          | AN9283            |
| AN9284.3         | 7              | 130           | conserved hypothetical protein   |                 | Oxidoreductase                                           | n/a          | AN9284            |
| AN9285.3         | 6              | 577           | conserved hypothetical protein   |                 | Glucose repressible protein ortholog Grg1                | n/a          | AN9285            |
| AN9286.3         | 5              | 433           | conserved hypothetical protein   |                 | Alpha-glucuronidase                                      | n/a          | AN9286            |
| AN9287.3         | 4              | 949           | conserved hypothetical protein   |                 | Extracellular GDSL-like lipase/acylhydrolase             | n/a          | AN9287            |
| AN9288.3         | 3              | 137           | conserved hypothetical protein   |                 | Protein of unknown function                              | n/a          | AN9288            |
| AN9289.3         | 2              | 1689          | conserved hypothetical protein   |                 | Transmembrane transporter                                | n/a          | AN9289            |
| AN9290.3         | 1              | 855           | conserved hypothetical protein   |                 | Protein of unknown function                              | n/a          | AN9290            |
| <b>AN9291.3</b>  | 0              | 0             | MFS transporter/NRPS-like enzyme |                 | Deleted ORF, see AN11820                                 | n/a          | AN9291            |
|                  |                |               |                                  |                 | Nonribosomal peptide sythetase (NRPS)-like enzyme        | n/a          | <b>AN11820</b> EP |
|                  |                |               |                                  |                 | Transmembrane transporter                                | n/a          | AN11821           |
| AN9292.3         | -1             | 1168          | conserved hypothetical protein   |                 | Zn(II)2Cys6 transcription factor                         | n/a          | AN9292            |
| AN9293.3         | -2             | 435           | conserved hypothetical protein   |                 | Zn(II)2Cys6 transcription factor                         | n/a          | AN9293            |
| AN9294.3         | -3             | 830           | hypothetical protein             |                 | Domain(s) with predicted role in transmembrane transport | n/a          | AN9294 ECS        |
| AN9295.3         | -4             | 2999          | conserved hypothetical protein   |                 | Domain(s) with predicted role in transmembrane transport | n/a          | AN9295            |
| AN9296.3         | -5             | 1950          | conserved hypothetical protein   | CYP535D1        | Cytochrome P450                                          | n/a          | AN9296            |
| AN9297.3         | -6             | 2446          | conserved hypothetical protein   |                 | Protein of unknown function                              | n/a          | AN9297            |
| AN9298.3         | -7             | 1797          | conserved hypothetical protein   | gmtB            | GDP-mannose transporter                                  | n/a          | AN9298            |

|           |     |      |                                |                                                                       |     |         |
|-----------|-----|------|--------------------------------|-----------------------------------------------------------------------|-----|---------|
|           |     |      | protein                        |                                                                       |     |         |
| AN9299.3  | -8  | 1891 | conserved hypothetical protein | Protein of unknown function                                           | n/a | AN9299  |
| AN9300.3  | -9  | 2743 | conserved hypothetical protein | Amino acid transmembrane transporter                                  | n/a | AN9300  |
| AN11210.3 | -10 | 953  | conserved hypothetical protein | Protein of unknown function                                           | n/a | AN11210 |
| AN11215.3 | -11 | 613  | conserved hypothetical protein | Domain(s) with predicted metal ion transmembrane transporter activity | n/a | AN11215 |
| AN9302.3  | -12 | 87   | conserved hypothetical protein | Protein serine/threonine kinase                                       | n/a | AN9302  |
| AN9303.3  | -13 | 637  | conserved hypothetical protein | Protein of unknown function                                           | n/a | AN9303  |
| AN9304.3  | -14 | 2063 | conserved hypothetical protein | Glutathione S-transferase                                             | n/a | AN9304  |
| AN9305.3  | -15 | 214  | conserved hypothetical protein | Acyl transferase                                                      | n/a | AN9305  |
| AN9306.3  | -16 | 654  | hypothetical protein           | Protein of unknown function                                           | n/a | AN9306  |
| AN9307.3  | -17 | 427  | conserved hypothetical protein | Protein of unknown function                                           | n/a | AN9307  |

## AN9314 cluster

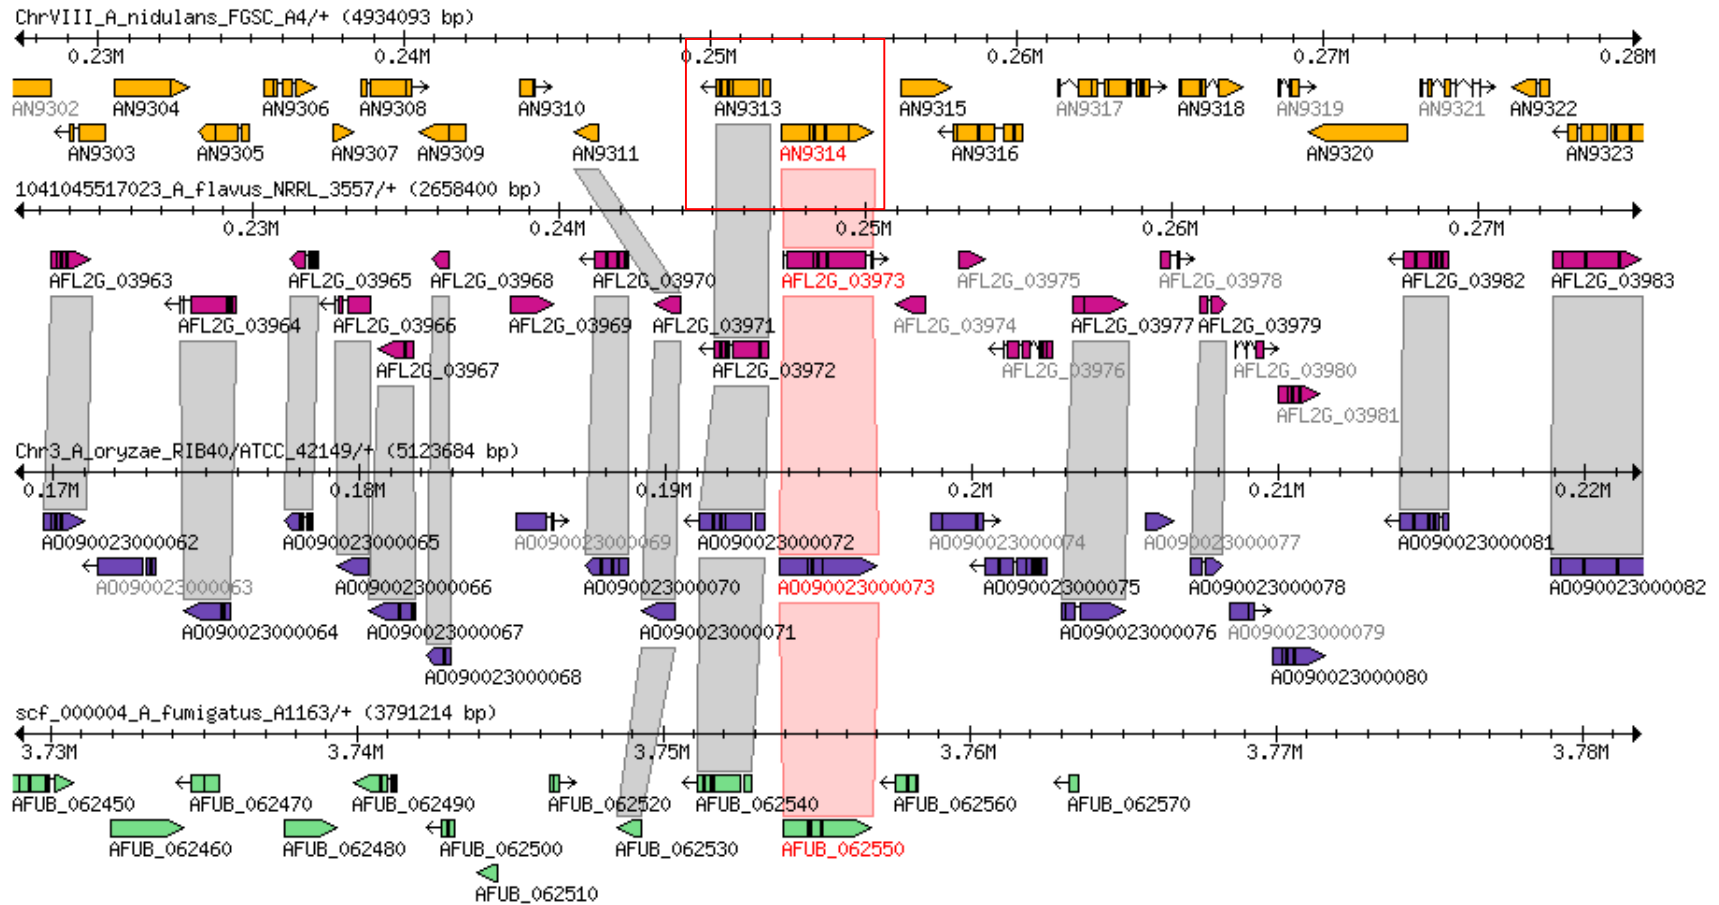

**AN9314 cluster**

| Gene id (SMURF)* | Gene positions | Gene distance | Annotated_gene_function (SMURF) | AspGD gene name | AspGD manual annotation and notes | antiSMASH ID | Gene ID       |    |
|------------------|----------------|---------------|---------------------------------|-----------------|-----------------------------------|--------------|---------------|----|
| n/a              |                |               |                                 |                 | Protein of unknown function       | n/a          | AN9311        |    |
| n/a              |                |               |                                 | <i>CYP58D1</i>  | Cytochrome P450                   | n/a          | AN9313        | EP |
| n/a              |                |               |                                 |                 | Entkaurene synthase               | n/a          | <b>AN9314</b> | EP |

## No PKS/NRPS backbone 1

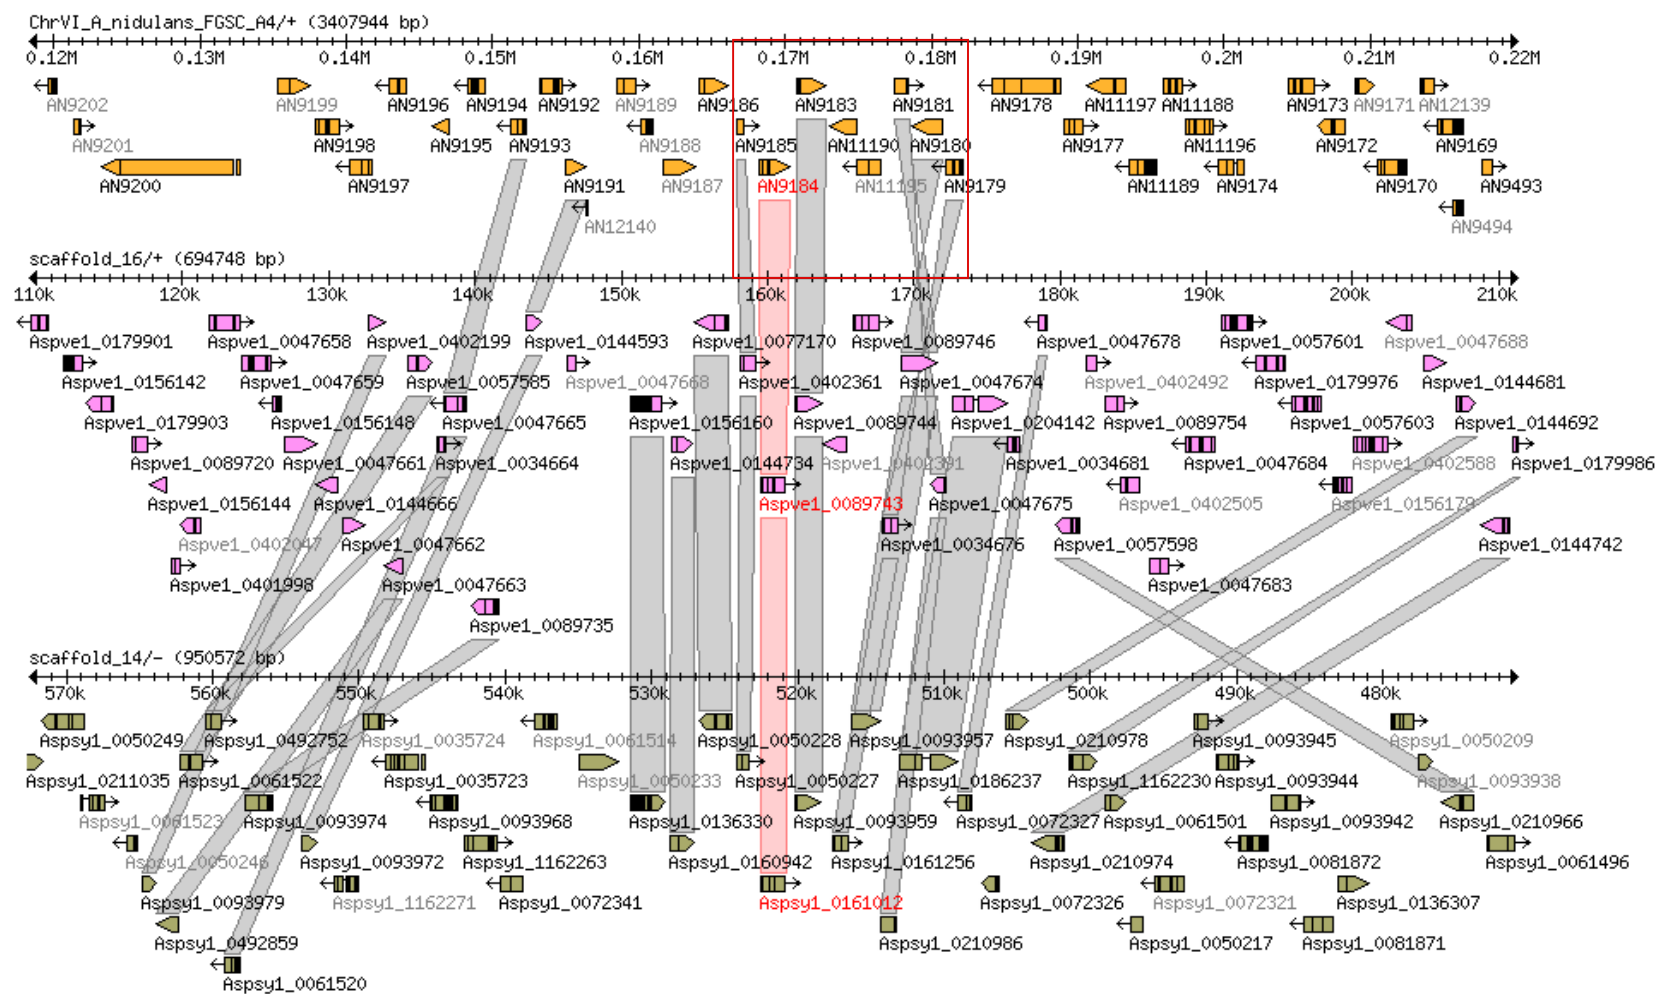

**No PKS/NRPS backbone 1**

| Gene id (SMURF)* | Gene positions | Gene distance | Annotated_gene_function (SMURF) | AspGD gene name | AspGD manual annotation and notes                                      | antiSMASH ID | Gene ID | ECS |
|------------------|----------------|---------------|---------------------------------|-----------------|------------------------------------------------------------------------|--------------|---------|-----|
| n/a              |                |               |                                 |                 | Pyridoxal reductase                                                    | n/a          | AN9179  | ECS |
| n/a              |                |               |                                 |                 | Transketolase                                                          | n/a          | AN9180  |     |
| n/a              |                |               |                                 |                 | Protein of unknown function C2H2 and Zn(2)-Cys(6) transcription factor | n/a          | AN9181  |     |
| n/a              |                |               |                                 |                 | Hydrolase                                                              | n/a          | AN11195 |     |
| n/a              |                |               |                                 |                 | Beta-glucosidase                                                       | n/a          | AN9183  |     |
| n/a              |                |               |                                 |                 | Transmembrane transporter                                              | prot_ID_567  | AN9184  |     |
| n/a              |                |               |                                 |                 | Protein of unknown function                                            | prot_ID_80   | AN9185  | ECS |
| n/a              |                |               |                                 |                 | Acid phosphatase                                                       | prot_ID_677  | AN9186  |     |
| n/a              |                |               |                                 |                 | F-box protein                                                          | prot_ID_184  | AN9187  |     |
| n/a              |                |               |                                 |                 | Protein of unknown function                                            | prot_ID_783  | AN9188  |     |
| n/a              |                |               |                                 |                 | Protein of unknown function                                            | prot_ID_287  | AN9189  |     |
| n/a              |                |               |                                 |                 | Protein of unknown function                                            | prot_ID_1133 | AN12140 |     |
| n/a              |                |               |                                 |                 | Protein of unknown function                                            | prot_ID_1075 | AN9191  |     |
| n/a              |                |               |                                 |                 | Protein of unknown function                                            | prot_ID_564  | AN9192  |     |
| n/a              |                |               |                                 |                 | Protein of unknown function                                            | prot_ID_78   | AN9193  |     |
| n/a              |                |               |                                 | cetL            | Protein of unknown function                                            | prot_ID_675  | AN9194  |     |

## No PKS/NRPS backbone 2

No manual prediction made

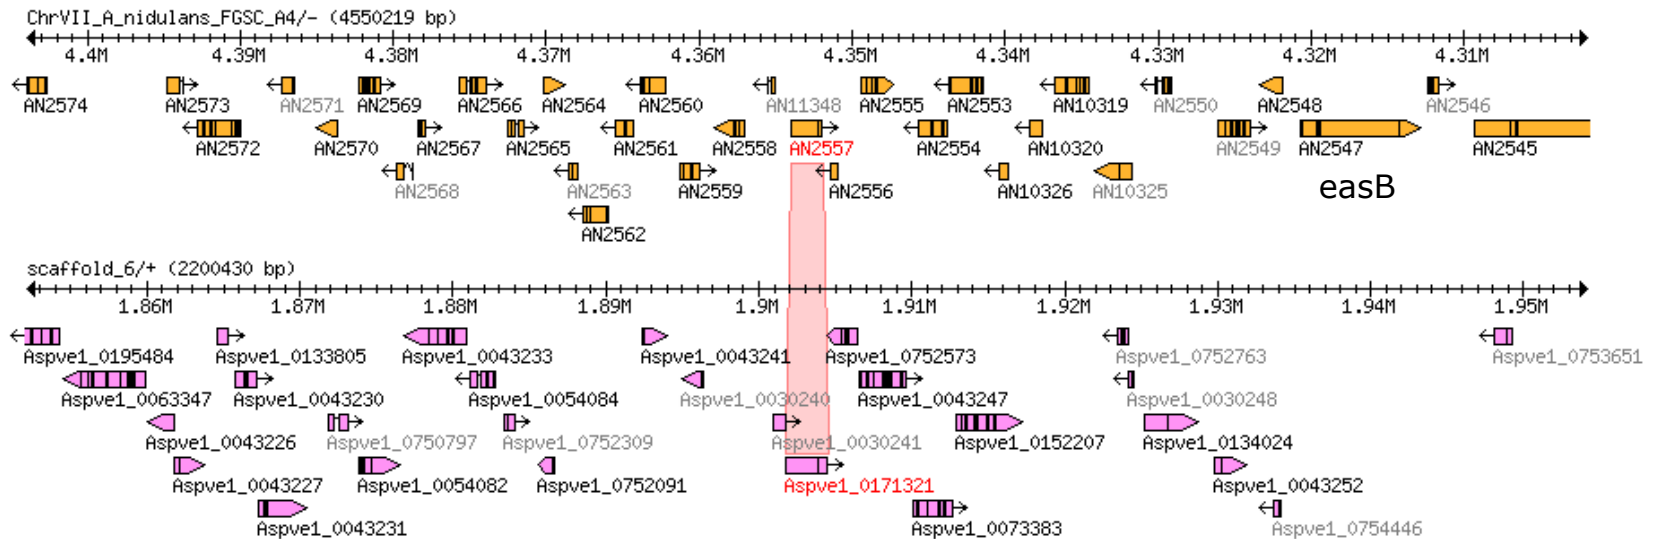



**No PKS/NRPS backbone 2**

| Gene id (SMURF)* | Gene positions | Gene distance | Annotated_gene_function (SMURF) | AspGD gene name | AspGD manual annotation and notes | antiSMASH ID        | Gene ID       |
|------------------|----------------|---------------|---------------------------------|-----------------|-----------------------------------|---------------------|---------------|
| n/a              |                |               |                                 |                 | Tyrosine kinase                   | prot_ID_212         | AN10325       |
| n/a              |                |               |                                 |                 | Transmembrane transporter         | prot_ID_365         | AN10319       |
| n/a              |                |               |                                 |                 | Protein of unknown function       | prot_ID_597         | AN10320       |
| n/a              |                |               |                                 |                 | Protein of unknown function       | prot_ID_1033        | AN10326       |
| n/a              |                |               |                                 |                 | Protein of unknown function       | prot_ID_979         | AN2553        |
| n/a              |                |               |                                 |                 | Protein of unknown function       | prot_ID_303         | AN2554        |
| n/a              |                |               |                                 |                 | Serine carboxypeptidase           | prot_ID_1119        | AN2555        |
| n/a              |                |               |                                 |                 | Protein of unknown function       | prot_ID_451         | AN2556        |
| n/a              |                |               |                                 |                 | Methyltransferase                 | <b>prot_ID_1259</b> | <b>AN2557</b> |
| n/a              |                |               |                                 |                 | Protein of unknown function       | prot_ID_330         | AN11348       |

### No PKS/NRPS backbone 3

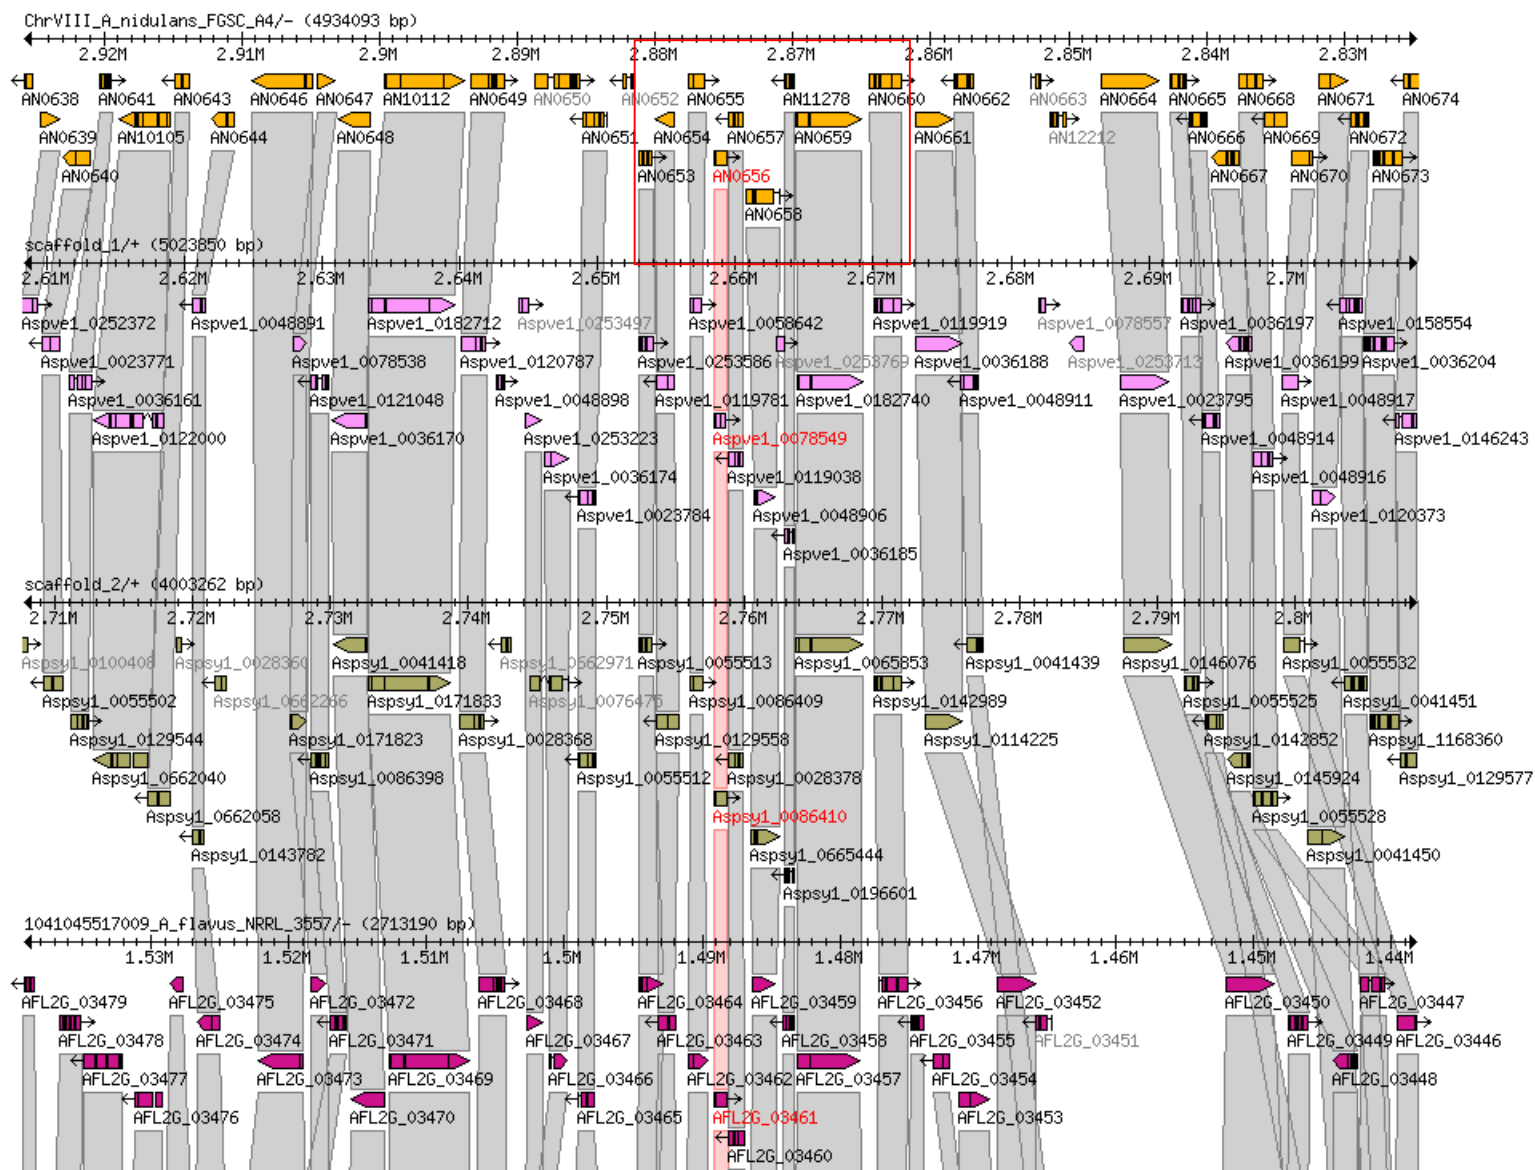

**No PKS/NRPS backbone 3**

| Gene id (SMURF)* | Gene positions | Gene distance | Annotated_gene_function (SMURF) | AspGD gene name | AspGD manual annotation and notes                                                                                                                          | antiSMASH ID       | Gene ID       |     |
|------------------|----------------|---------------|---------------------------------|-----------------|------------------------------------------------------------------------------------------------------------------------------------------------------------|--------------------|---------------|-----|
| n/a              |                |               |                                 |                 | Protein of unknown function                                                                                                                                | prot_ID_1442       | AN0650        |     |
| n/a              |                |               |                                 | fadA            | Alpha subunit of a heterotrimeric G protein                                                                                                                | prot_ID_212        | AN0651        |     |
| n/a              |                |               |                                 |                 | Protein of unknown function                                                                                                                                | prot_ID_666        | AN0652        |     |
| n/a              |                |               |                                 |                 | Zn(II)2Cys6 transcription factor Ortholog(s) have farnesyltranstransferase activity, role in terpenoid biosynthetic process and mitochondrion localization | prot_ID_1130       | AN0653        | ECS |
| n/a              |                |               |                                 |                 |                                                                                                                                                            | prot_ID_1593       | AN0654        |     |
| n/a              |                |               |                                 | sepM            | serine carboxypeptidase Has methylase domain involved in ubiquinone/menaquinone biosynthesis                                                               | prot_ID_368        | AN0655        |     |
| n/a              |                |               |                                 |                 | Mitochondrial outer membrane protein                                                                                                                       | <b>prot_ID_824</b> | <b>AN0656</b> |     |
| n/a              |                |               |                                 |                 | Copper-activated transcription factor                                                                                                                      | prot_ID_1299       | AN0657        |     |
| n/a              |                |               |                                 |                 | Ortholog(s) have role in cristae formation and integral to mitochondrial inner membrane, mitochondrial crista junction localization                        | prot_ID_73         | AN0658        |     |
| n/a              |                |               |                                 |                 |                                                                                                                                                            | prot_ID_1139       | AN11278       |     |
| n/a              |                |               |                                 |                 | Protein of unknown function Allantoin transporter; transcript is induced by allantoin and by uric acid and is repressed by ammonium                        | prot_ID_526        | AN0659        |     |
| n/a              |                |               |                                 |                 |                                                                                                                                                            | n/a                | AN0660        | ECS |

## No PKS/NRPS backbone 4

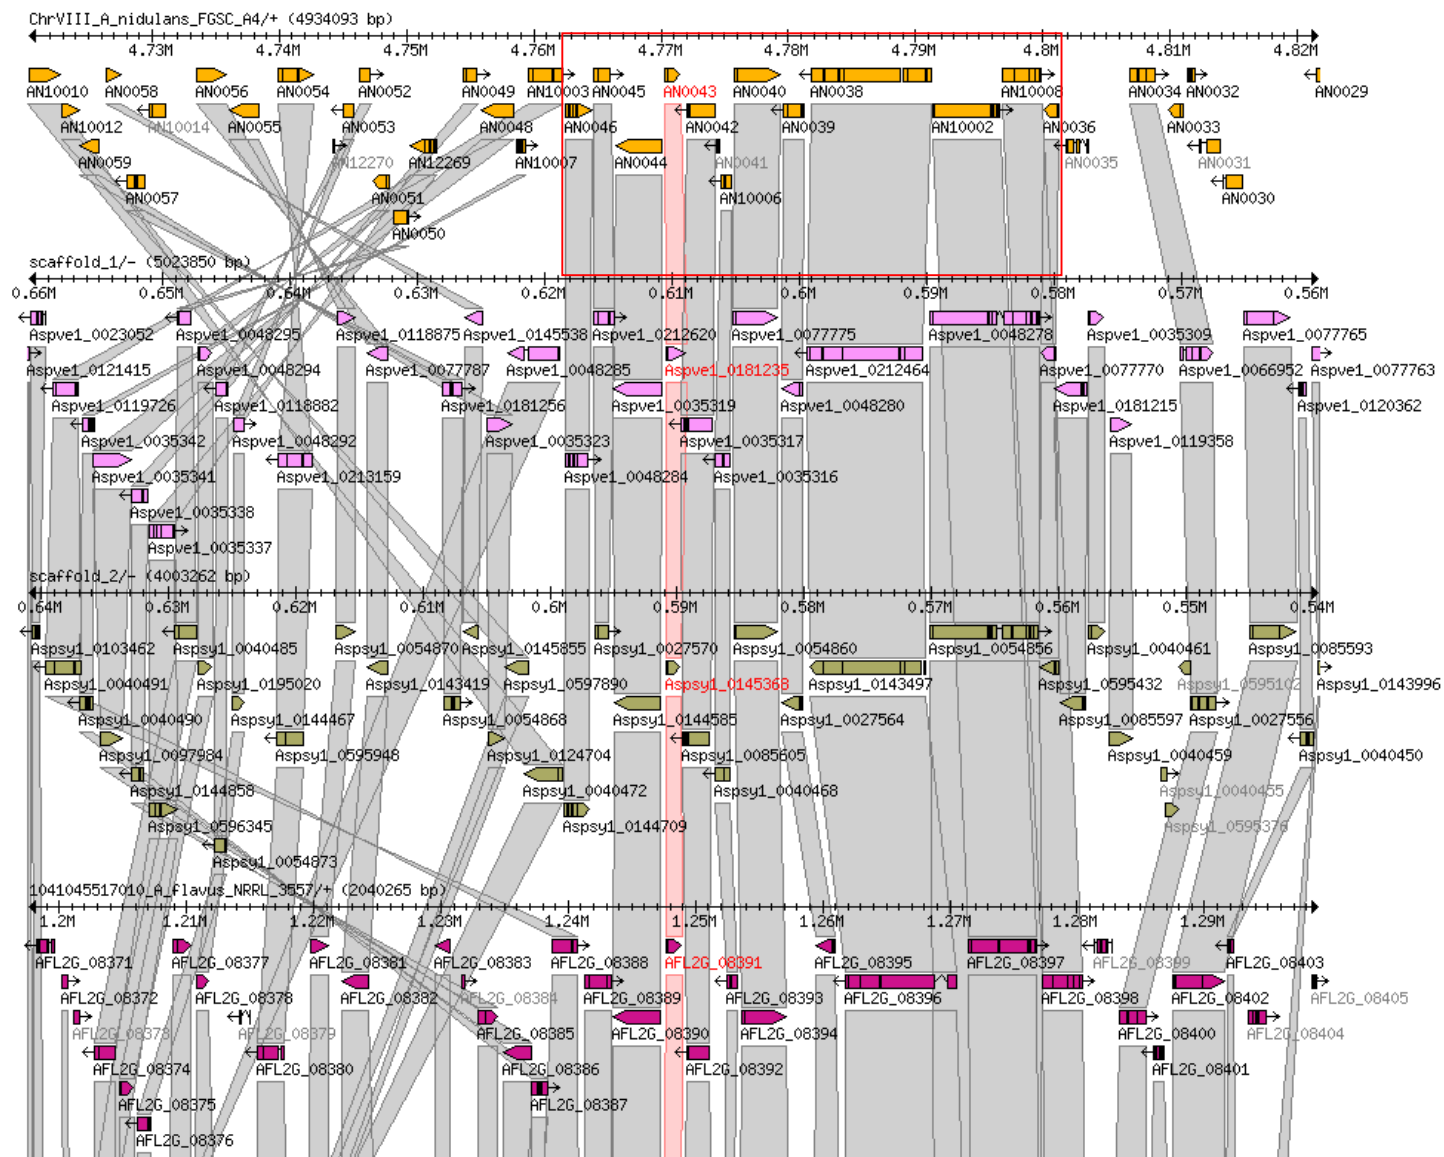

#### No PKS/NRPS backbone 4

| Gene id (SMURF)* | Gene positions | Gene distance | Annotated_gene_function (SMURF) | AspGD gene name | AspGD manual annotation and notes                  | antiSMASH ID       | Gene ID       |    |
|------------------|----------------|---------------|---------------------------------|-----------------|----------------------------------------------------|--------------------|---------------|----|
| n/a              |                |               |                                 |                 | Protein of unknown function                        | n/a                | AN0036        |    |
| n/a              |                |               |                                 | culD            | Ubiquitin protein ligase                           | n/a                | AN10008       |    |
| n/a              |                |               |                                 | nup192          | Nuclear pore complex protein                       | n/a                | AN10002       |    |
| n/a              |                |               |                                 | atmA            | 1-phosphatidylinositol-3-kinase                    | n/a                | AN0038        |    |
| n/a              |                |               |                                 |                 | Protein of unknown function                        | prot_ID_1262       | AN0039        |    |
| n/a              |                |               |                                 |                 | DNA-directed DNA polymerase                        | prot_ID_539        | AN0040        |    |
| n/a              |                |               |                                 |                 | Protein of unknown function                        | prot_ID_1004       | AN0041        |    |
| n/a              |                |               |                                 |                 | Transmembrane transporter                          | prot_ID_1477       | AN0042        | EP |
| n/a              |                |               |                                 |                 | Transferase                                        | <b>prot_ID_252</b> | <b>AN0043</b> |    |
| n/a              |                |               |                                 |                 | Single-stranded DNA-dependent ATPase               | prot_ID_705        | AN0044        | EP |
| n/a              |                |               |                                 |                 | Protein of unknown function                        | prot_ID_1175       | AN0045        |    |
| n/a              |                |               |                                 |                 | Histidyl-tRNA synthetase                           | prot_ID_1632       | AN0046        |    |
| n/a              |                |               |                                 |                 | GTPase                                             | prot_ID_1168       | AN10003       |    |
| n/a              |                |               |                                 |                 | Domain(s) with predicted zinc ion binding activity | prot_ID_858        | AN10006       |    |
