# Supplementary material for: Comprehensive annotation of secondary metabolite biosynthetic genes and gene clusters of Aspergillus nidulans, A. fumigatus, A. niger and A. oryzae
Source: PubMed Central journal article supplement (PMC3689640; doi:10.1186/1471-2180-13-91), 2013-04-26
Supplement: 1471-2180-13-91-S3.pdf [file 1471-2180-13-91-S3.pdf]

### **Additional file 3**

**Comprehensive annotation of secondary metabolite biosynthetic genes and gene clusters of *Aspergillus nidulans*, *A. fumigatus*, *A. niger* and *A. oryzae***

Diane O. Inglis, Jon Binkley, Marek Skrzypek, Martha B. Arnaud, Gustavo Cerqueira, Prach Shah, Farrell Wymore,  
Jennifer R. Wortman and Gavin Sherlock

Abbreviations: ECS, end of cluster synteny; IGD, increase in intergenic distance; FA, change in functional annotation; ED, experimentally determined

## Fumigaclavine C (fga) cluster

Experimentally determined cluster

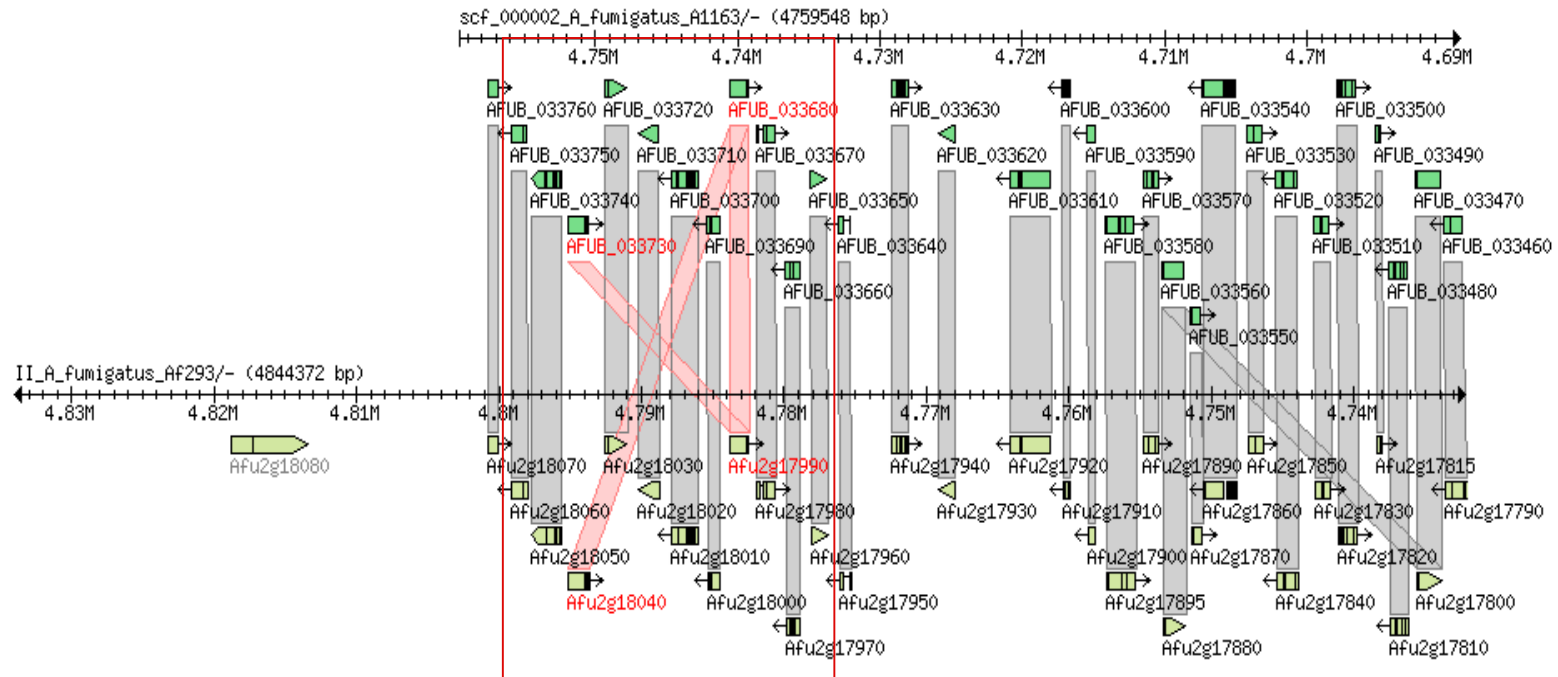

### Fumigaclavine C (fga) cluster

| Gene id (SMURF)     | Gene positions | Gene distance | Gene Annotated_gene_function (SMURF)                    | AspGD gene name | AspGD supplementary annotation | antiSMASH ID        | Gene ID (I)       | Gene ID (II)        |
|---------------------|----------------|---------------|---------------------------------------------------------|-----------------|--------------------------------|---------------------|-------------------|---------------------|
| AFUA_2G17930        | 11             | 2110          | integral membrane protein                               |                 |                                | n/a                 | Afu2g17930        | AFUA_2G17930        |
| AFUA_2G17940        | 10             | 2876          | MAK1-like monooxygenase, putative                       |                 |                                | n/a                 | Afu2g17940        | AFUA_2G17940        |
| AFUA_2G17950        | 9              | 842           | conserved hypothetical protein                          |                 |                                | prot_ID_1588        | Afu2g17950        | AFUA_2G17950        |
| AFUA_2G17960        | 8              | 788           | NADPH dehydrogenase Oye3, putative                      | fgaOn/a3/easA   |                                | prot_ID_1589        | Afu2g17960        | AFUA_2G17960 ED     |
| AFUA_2G17970        | 7              | 706           | NmrA-like ergot alkaloid biosynthetic protein A         | fgaFS/easG      |                                | prot_ID_1590        | Afu2g17970        | AFUA_2G17970        |
| AFUA_2G17980        | 6              | 530           | cytochrome P450 monooxygenase, putative                 | easK/fgaP450-1  |                                | prot_ID_1591        | Afu2g17980        | AFUA_2G17980        |
| AFUA_2G17990        | 5              | 730           | dimethylallyl tryptophan synthase FgaPT1                | fgaPT1/easL     |                                | <b>prot_ID_1592</b> | <b>Afu2g17990</b> | <b>AFUA_2G17990</b> |
| AFUA_2G18000        | 4              | 653           | short chain dehydrogenase/oxidoreductase Cpox2          | fgaDH/easD      |                                | prot_ID_1593        | Afu2g18000        | AFUA_2G18000        |
| AFUA_2G18010        | 3              | 848           | cytochrome P450 monooxygenase, putative                 | easM            |                                | prot_ID_1594        | Afu2g18010        | AFUA_2G18010        |
| AFUA_2G18020        | 2              | 677           | O-acetyltransferase, putative                           | fgaAT/easN      |                                | prot_ID_1595        | Afu2g18020        | AFUA_2G18020        |
| AFUA_2G18030        | 1              | 1073          | catalase Cat                                            | fgaCat/easC     |                                | prot_ID_1596        | Afu2g18030        | AFUA_2G18030        |
| <b>AFUA_2G18040</b> | 0              | 0             | dimethylallyl tryptophan synthase FgaPT2                | dmaW/FgaPT2     |                                | <b>prot_ID_1597</b> | <b>Afu2g18040</b> | <b>AFUA_2G18040</b> |
| AFUA_2G18050        | -1             | 501           | FAD binding oxidoreductase Cpox1                        | fgaOn/a1/easE   |                                | prot_ID_1598        | Afu2g18050        | AFUA_2G18050        |
| AFUA_2G18060        | -2             | 257           | AdoMet:dimethylallyltryptophan N-methyltransferase EasF | fgaMT/easF      |                                | prot_ID_1599        | Afu2g18060        | AFUA_2G18060 ED     |
| AFUA_2G18070        | -3             | 1001          | metalloproteinase, putative                             |                 |                                | prot_ID_1600        | Afu2g18070        | AFUA_2G18070        |

## Fumitremogin B (ftm) cluster

Experimentally determined cluster

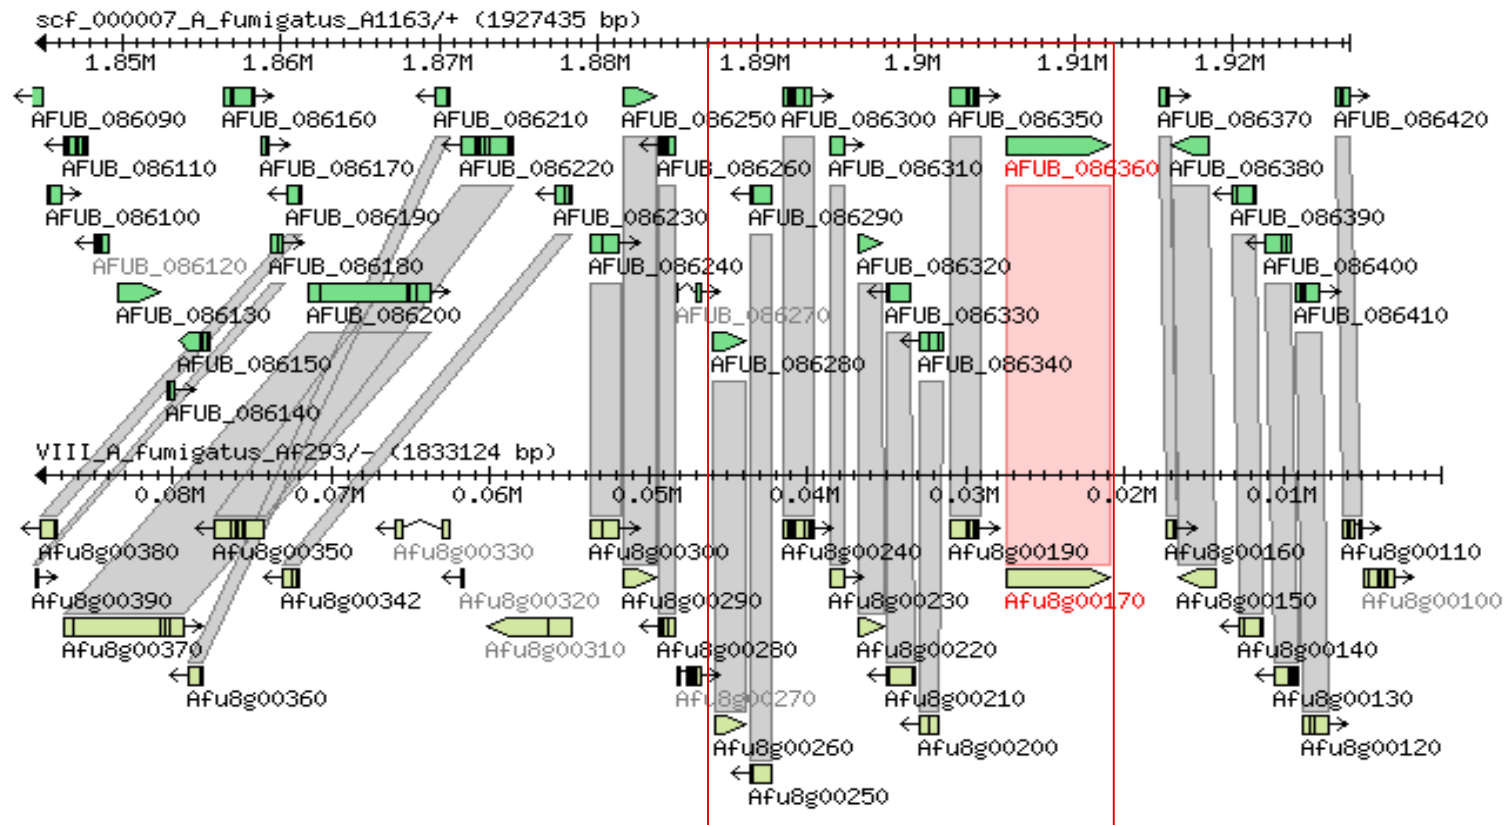

### Fumitremorgin B (ftm) cluster

| Gene id (SMURF)     | Gene distance | Annotated_gene_function (SMURF) | AspGD gene name                                       | AspGD supplementary annotation | antiSMASH ID      | Gene ID (I)       | Gene ID (II)           |
|---------------------|---------------|---------------------------------|-------------------------------------------------------|--------------------------------|-------------------|-------------------|------------------------|
| n/a                 |               |                                 |                                                       | Aspartate-tRNA ligase          | prot_ID_1         | Afu8g00100        | AFUA_8G00100           |
| n/a                 |               |                                 |                                                       | Oxidoreductase                 | prot_ID_2         | Afu8g00110        | AFUA_8G00110           |
| n/a                 |               |                                 |                                                       | Protein of unknown function    | prot_ID_20        | Afu8g00300        | AFUA_8G00300           |
| n/a                 |               |                                 |                                                       | Protein of unknown function    | prot_ID_19        | Afu8g00290        | AFUA_8G00290           |
| AFUA_8G00280        | 10            | 88                              | short-chain dehydrogenase, putative                   |                                | prot_ID_18        | Afu8g00280        | AFUA_8G00280           |
| AFUA_8G00270        | 9             | 790                             | conserved hypothetical protein                        |                                | prot_ID_17        | Afu8g00270        | AFUA_8G00270           |
| AFUA_8G00260        | 8             | 305                             | F-box domain and ankyrin repeat protein               | ftmI                           | prot_ID_16        | Afu8g00260        | AFUA_8G00260 ED        |
| <b>AFUA_8G00250</b> | 7             | 728                             | dimethylallyl tryptophan synthase, putative           | ftmPT2                         | prot_ID_15        | Afu8g00250        | AFUA_8G00250           |
| AFUA_8G00240        | 6             | 1114                            | cytochrome P450 monooxygenase, putative               | ftmG                           | prot_ID_14        | Afu8g00240        | AFUA_8G00240           |
| AFUA_8G00230        | 5             | 877                             | phytanoyl-CoA dioxygenase family protein              | ftmF                           | prot_ID_13        | Afu8g00230        | AFUA_8G00230           |
| AFUA_8G00220        | 4             | 181                             | cytochrome P450, putative                             | ftmE                           | prot_ID_12        | Afu8g00220        | AFUA_8G00220           |
| AFUA_8G00210        | 3             | 400                             | dimethylallyl tryptophan synthase FtmPT1              | ftmPT1                         | <b>prot_ID_11</b> | <b>Afu8g00210</b> | <b>AFUA_8G00210</b>    |
| AFUA_8G00200        | 2             | 751                             | O-methyltransferase, putative                         | ftmD                           | prot_ID_10        | Afu8g00200        | AFUA_8G00200           |
| AFUA_8G00190        | 1             | 1544                            | cytochrome P450, putative                             | ftmC                           | prot_ID_9         | Afu8g00190        | AFUA_8G00190           |
| AFUA_8G00170        | 0             | 0                               | nonribosomal brevianamide peptide synthase FtmA       | ftmA                           | <b>prot_ID_8</b>  | <b>Afu8g00170</b> | <b>AFUA_8G00170</b> ED |
| AFUA_8G00160        | -1            | 3508                            | conserved hypothetical protein                        |                                | prot_ID_7         | Afu8g00160        | AFUA_8G00160           |
| AFUA_8G00150        | -2            | 82                              | conserved hypothetical protein                        |                                | prot_ID_6         | Afu8g00150        | AFUA_8G00150           |
| AFUA_8G00140        | -3            | 1488                            | MFS transporter, putative                             |                                | prot_ID_5         | Afu8g00140        | AFUA_8G00140           |
| AFUA_8G00130        | -4            | 648                             | hypothetical protein                                  |                                | prot_ID_4         | Afu8g00130        | AFUA_8G00130           |
| AFUA_8G00120        | -5            | 371                             | hypothetical protein                                  |                                | prot_ID_3         | Afu8g00120        | AFUA_8G00120           |
| AFUA_8G00110        | -6            | 970                             | oxidoreductase, 2OG-Fe(II) oxygenase family, putative |                                | prot_ID_21        | Afu8g00110        | AFUA_8G00110           |
| AFUA_8G00100        | -7            | 201                             | aspartate-tRNA ligase, putative                       |                                | n/a               | Afu8g00100        | AFUA_8G00100           |

# Glitoxin (gli) cluster

Experimentally determined cluster

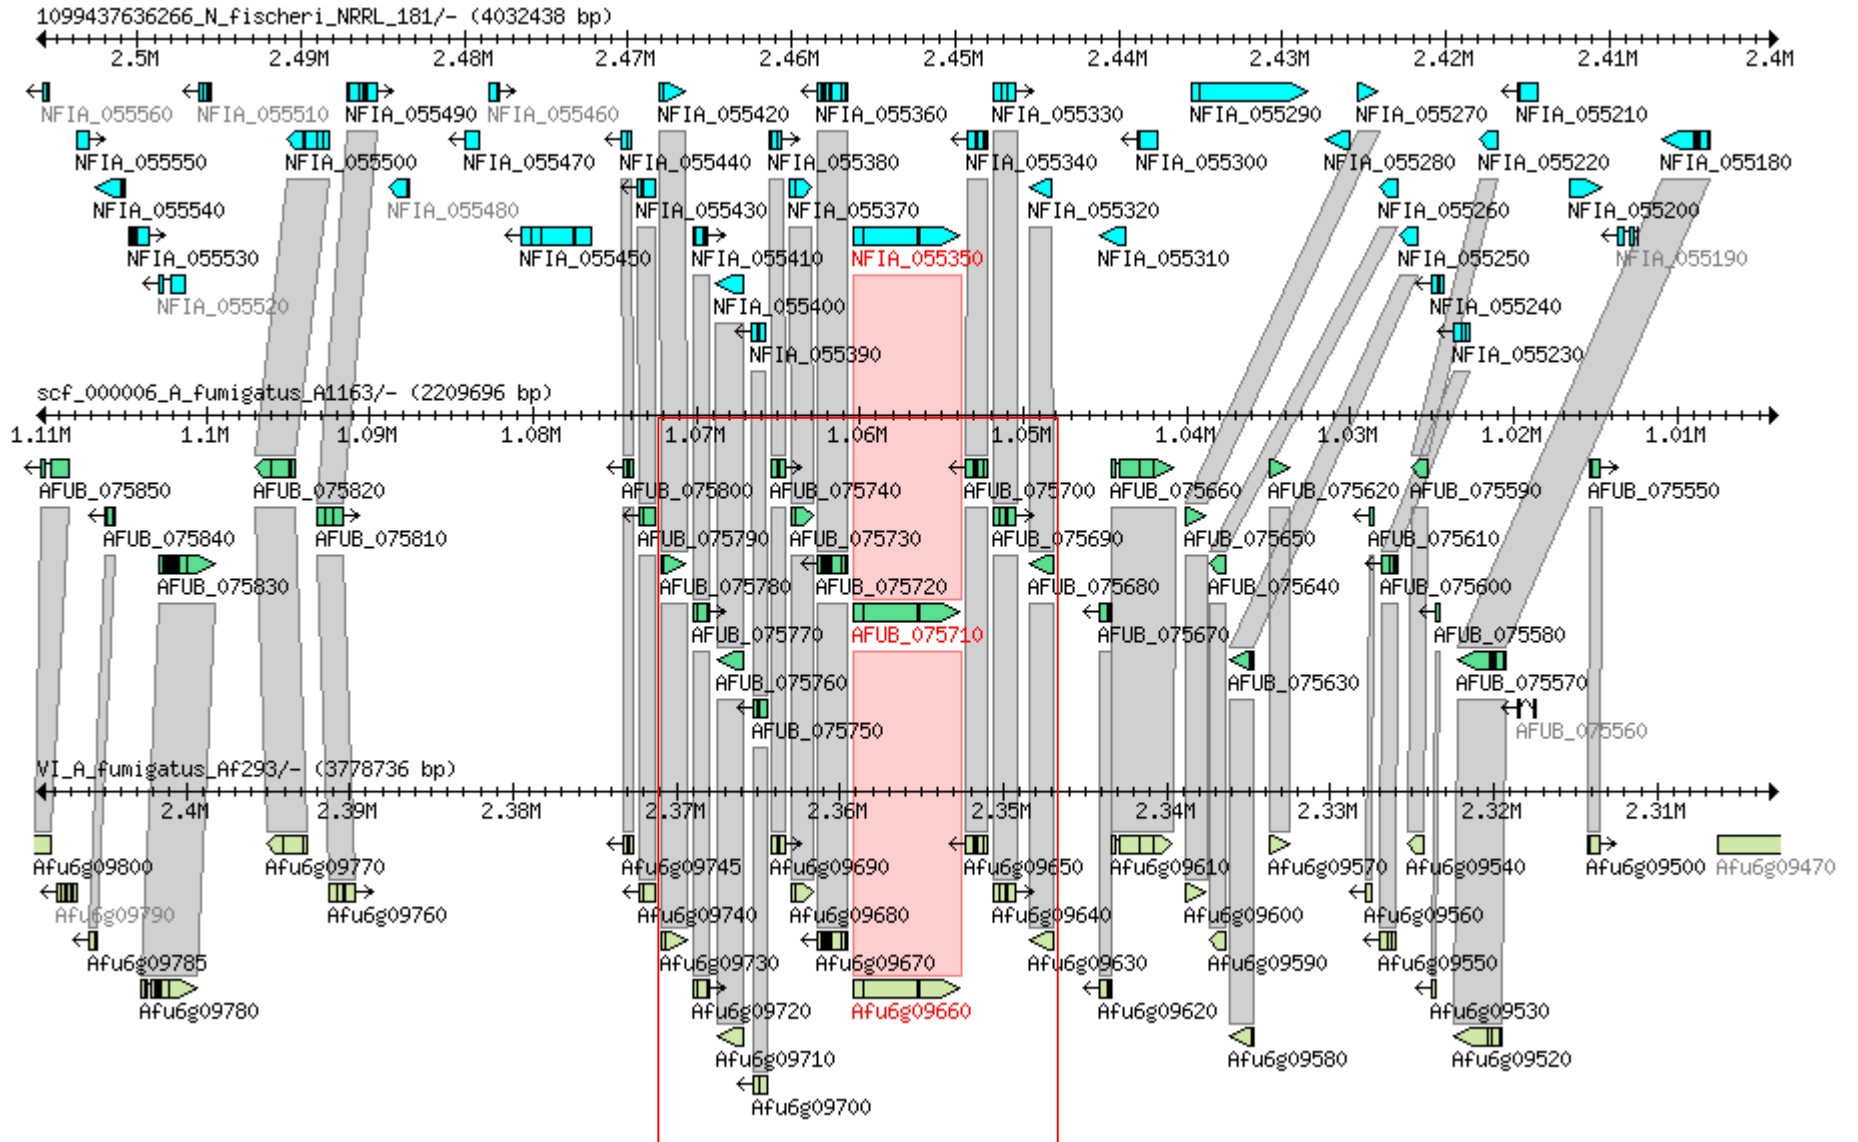

### Gliotoxin (gli) cluster

| Gene id (SMURF)     | Gene positions | Gene distance | Gene Annotated_gene_function (SMURF)                                     | AspGD gene name | AspGD supplementary annotation | antiSMASH ID       | Gene ID (I)       | Gene ID (II)         |
|---------------------|----------------|---------------|--------------------------------------------------------------------------|-----------------|--------------------------------|--------------------|-------------------|----------------------|
| n/a                 |                |               |                                                                          |                 | Putative acetyl hydrolase      | prot_ID_722        | Afu6g09520        | AFUA_6G09520         |
| n/a                 |                |               |                                                                          |                 | Protein of unknown function    | prot_ID_723        | Afu6g09530        | AFUA_6G09530         |
| n/a                 |                |               |                                                                          |                 | Endo-1,4 beta-glucanase        | prot_ID_724        | Afu6g09540        | AFUA_6G09540         |
| n/a                 |                |               |                                                                          |                 | RTA1 domain protein            | prot_ID_725        | Afu6g09550        | AFUA_6G09550         |
| n/a                 |                |               |                                                                          |                 | Protein of unknown function    | prot_ID_726        | Afu6g09560        | AFUA_6G09560         |
| n/a                 |                |               |                                                                          |                 | Protein of unknown function    | prot_ID_727        | Afu6g09570        | AFUA_6G09570         |
| AFUA_6G09580        | 8              | 220           | C6 finger domain protein, putative                                       |                 |                                | prot_ID_728        | Afu6g09580        | AFUA_6G09580         |
| AFUA_6G09590        | 7              | 84            | zinc alcohol dehydrogenase, putative                                     |                 |                                | prot_ID_729        | Afu6g09590        | AFUA_6G09590         |
| AFUA_6G09600        | 6              | 712           | zinc metalloproteinase, putative nonribosomal peptide synthase, putative |                 |                                | prot_ID_730        | Afu6g09600        | AFUA_6G09600         |
| AFUA_6G09610        | 5              | 41            |                                                                          |                 |                                | prot_ID_731        | Afu6g09610        | AFUA_6G09610         |
| AFUA_6G09620        | 4              | 2890          | hypothetical protein                                                     |                 |                                | prot_ID_732        | Afu6g09620        | AFUA_6G09620         |
| AFUA_6G09630        | 3              | 720           | C6 finger domain protein GliZ                                            | gliZ            |                                | prot_ID_733        | Afu6g09630        | AFUA_6G09630 ED, IGD |
| AFUA_6G09640        | 2              | 343           | aminotransferase GliI                                                    | gliI            |                                | prot_ID_734        | Afu6g09640        | AFUA_6G09640         |
| AFUA_6G09650        | 1              | 355           | membrane dipeptidase GliJ                                                | gliJ            |                                | <b>prot_ID_735</b> | <b>Afu6g09650</b> | <b>AFUA_6G09650</b>  |
| <b>AFUA_6G09660</b> | 0              | 0             | nonribosomal peptide synthase GliP cytochrome P450 oxidoreductase GliC   | gliP            |                                | prot_ID_736        | Afu6g09660        | AFUA_6G09660         |
| AFUA_6G09670        | -1             | 405           |                                                                          | gliC            |                                | prot_ID_737        | Afu6g09670        | AFUA_6G09670         |
| AFUA_6G09680        | -2             | 284           | O-methyltransferase GliM                                                 | gliM            |                                | prot_ID_738        | Afu6g09680        | AFUA_6G09680         |
| AFUA_6G09690        | -3             | 376           | glutathione S-transferase GliG                                           | gliG            |                                | prot_ID_739        | Afu6g09690        | AFUA_6G09690         |
| AFUA_6G09700        | -4             | 252           | gliotoxin biosynthesis protein GliK                                      | gliK            |                                | prot_ID_740        | Afu6g09700        | AFUA_6G09700         |
| AFUA_6G09710        | -5             | 589           | MFS gliotoxin efflux transporter GliA                                    | gliA            |                                | prot_ID_741        | Afu6g09710        | AFUA_6G09710         |
| AFUA_6G09720        | -6             | 390           | methyltransferase GliN cytochrome P450 oxidoreductase GliF               | gliN            |                                | prot_ID_742        | Afu6g09720        | AFUA_6G09720         |
| AFUA_6G09730        | -7             | 454           |                                                                          | gliF            |                                | prot_ID_743        | Afu6g09730        | AFUA_6G09730         |
| AFUA_6G09740        | -8             | 303           | thioredoxin reductase GliT                                               | gliT            |                                | prot_ID_744        | Afu6g09740        | AFUA_6G09740 ED      |
| n/a                 |                |               |                                                                          |                 | conserved hypothetical protein | prot_ID_1210       | Afu6g09745        | AFUA_6G09745         |

# Pseurotin A cluster

Experimentally determined cluster

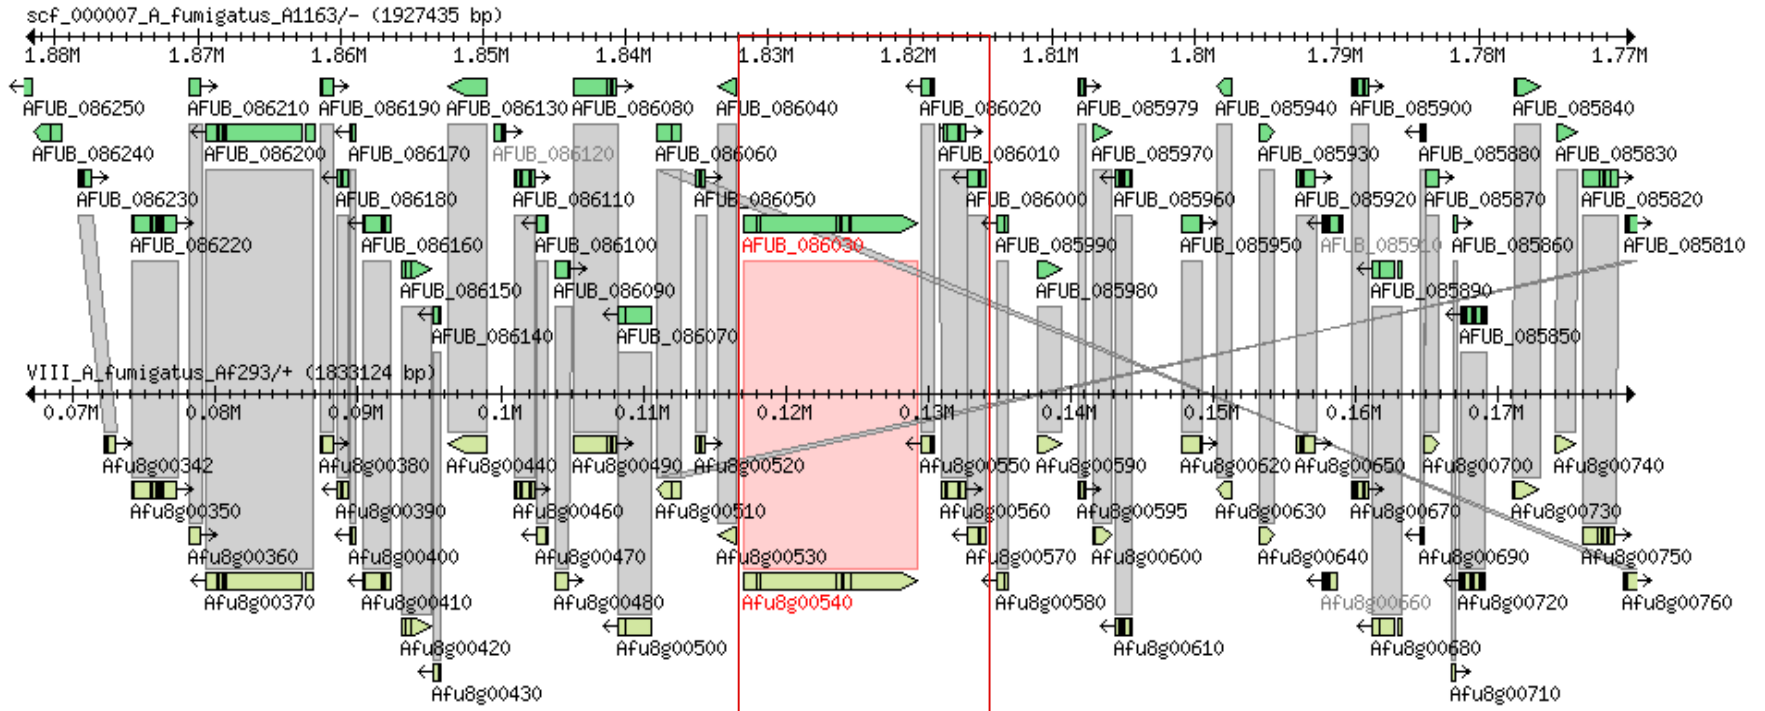



### Pseurotin A cluster

| Gene id (SMURF)     | Gene positions | Gene distance | Gene Annotated_gene_function (SMURF)               | AspGD gene name | AspGD supplementary annotation              | antiSMASH ID                | Gene ID (I)       | Gene ID (II)          |
|---------------------|----------------|---------------|----------------------------------------------------|-----------------|---------------------------------------------|-----------------------------|-------------------|-----------------------|
| AFUA_8G00370        | -16            | 483           | polyketide synthase, putative                      |                 |                                             |                             | Afu8g00370        | AFUA_8G00370          |
| AFUA_8G00380        | -15            | 197           | DltD N-terminal domain protein                     |                 |                                             |                             | Afu8g00380        | AFUA_8G00380          |
| n/a                 |                |               |                                                    |                 | Protein of unknown function                 | prot_ID_607                 | Afu8g00342        | AFUA_8G00342          |
| AFUA_8G00390        | -14            | 87            | O-methyltransferase, putative                      |                 | O-methyltransferase                         | prot_ID_28                  | Afu8g00390        | AFUA_8G00390          |
| AFUA_8G00400        | -13            | 429           | conserved hypothetical protein                     |                 | Protein of unknown function                 | prot_ID_29                  | Afu8g00400        | AFUA_8G00400          |
| AFUA_8G00410        | -12            | 878           | methionine aminopeptidase, type II, putative       |                 | Methionine aminopeptidase type II           | prot_ID_30                  | Afu8g00410        | AFUA_8G00410          |
| AFUA_8G00420        | -11            | 176           | C6 finger transcription factor, putative           | metAP           | C6 zinc finger domain protein               | prot_ID_31                  | Afu8g00420        | AFUA_8G00420          |
| AFUA_8G00430        | -10            | 445           | conserved hypothetical protein                     |                 | Protein of unknown function                 | prot_ID_32                  | Afu8g00430        | AFUA_8G00430          |
| AFUA_8G00440        | -9             | 1948          | steroid monooxygenase, putative                    |                 | Putative steroid monooxygenase              | prot_ID_33                  | Afu8g00440        | AFUA_8G00440          |
| AFUA_8G00460        | -8             | 133           | methionine aminopeptidase, type I, putative        |                 | aminopeptidase/metalloexopeptidase          | prot_ID_34                  | Afu8g00460        | AFUA_8G00460          |
| AFUA_8G00470        | -7             | 397           | conserved hypothetical protein                     |                 | Protein of unknown function                 | prot_ID_35                  | Afu8g00470        | AFUA_8G00470          |
| AFUA_8G00480        | -6             | 401           | phytanoyl-CoA dioxygenase family protein           |                 | Protein of unknown function                 | prot_ID_36                  | Afu8g00480        | AFUA_8G00480          |
| AFUA_8G00490        | -5             | 48            | PKS-like enzyme, putative                          |                 | Polyketide synthase                         | prot_ID_37                  | Afu8g00490        | AFUA_8G00490          |
| AFUA_8G00500        | -4             | 409           | acetate-CoA ligase, putative                       |                 | Putative acetate-CoA ligase                 | prot_ID_38                  | Afu8g00500        | AFUA_8G00500          |
| AFUA_8G00510        | -3             | 1148          | cytochrome P450 oxidoreductase OrdA-like, putative |                 | Oxidoreductase                              | prot_ID_39                  | Afu8g00510        | AFUA_8G00510          |
| AFUA_8G00520        | -2             | 780           | integral membrane protein                          |                 | Prenyltransferase                           | prot_ID_40                  | Afu8g00520        | AFUA_8G00520          |
| AFUA_8G00530        | -1             | 463           | alpha/beta superfamily hydrolase                   |                 | Alpha/beta hydrolase                        | prot_ID_41                  | Afu8g00530        | AFUA_8G00530          |
| <b>AFUA_8G00540</b> | 0              | 0             | hybrid PKS-NRPS enzyme, putative                   |                 | <b>PKS-NRPS hybrid</b>                      | <b>prot_ID_42</b>           | <b>Afu8g00540</b> | <b>AFUA_8G00540ED</b> |
| AFUA_8G00550        | 1              | 235           | methyltransferase SirN-like, putative              | nrps14/pesO     | methyl transferase                          | prot_ID_43                  | Afu8g00550        | AFUA_8G00550          |
| AFUA_8G00560        | 2              | 539           | cytochrome P450 oxidoreductase, putative           |                 | Cytochrome P450 monooxygenase               | prot_ID_44                  | Afu8g00560        | AFUA_8G00560          |
| AFUA_8G00570        | 3              | 89            | alpha/beta hydrolase, putative                     |                 | Hydrolase                                   | prot_ID_45                  | Afu8g00570        | AFUA_8G00570 ED       |
| AFUA_8G00580        | 4              | 825           | glutathione S-transferase, putative                |                 | Elongation factor E1fB                      | prot_ID_46                  | Afu8g00580        | AFUA_8G00580          |
| AFUA_8G00590        | 5              | 2026          | fatty acid desaturase, putative                    | elfB            | Oxidoreductase                              | prot_ID_47                  | Afu8g00590        | AFUA_8G00590          |
| AFUA_8G00595        | 6              | 1189          | Ham1 family pyrophosphatase, putative              |                 | Domain(s) with predicted hydrolase activity | n/a                         | Afu8g00595        | AFUA_8G00595          |
| AFUA_8G00600        | 7              | 541           | NAD dependent epimerase/dehydratase family protein |                 | Protein of unknown function                 | prot_ID_48                  | Afu8g00600        | AFUA_8G00600          |
| AFUA_8G00610        | 8              | 228           | cell surface protein Mas1, putative                | mas1            | Putative cell surface protein               | prot_ID_49                  | Afu8g00610        | AFUA_8G00610          |
| AFUA_8G00620        | 9              | 3538          | dimethylallyl tryptophan synthase, putative        | cdpNPT          | DMATS-type N-prenyltransferase              | prot_ID_50                  | Afu8g00620        | AFUA_8G00620          |
| n/a                 |                |               |                                                    |                 | Protein of unknown function                 | prot_ID_51                  | Afu8g00630        | AFUA_8G00630          |
| n/a                 |                |               |                                                    |                 | Protein of unknown function                 | prot_ID_52                  | Afu8g00640        | AFUA_8G00640          |
| n/a                 |                |               |                                                    |                 | Protein of unknown function                 | Protein of unknown function | Afu8g00650        | AFUA_8G00650          |
| n/a                 |                |               |                                                    |                 | Protein of unknown function                 | prot_ID_54                  | Afu8g00660        | AFUA_8G00660          |

|     |      |                                                                                                              |             |            |              |
|-----|------|--------------------------------------------------------------------------------------------------------------|-------------|------------|--------------|
| n/a |      | Protein of unknown function                                                                                  | prot_ID_55  | Afu8g00670 | AFUA_8G00670 |
| n/a |      | Protein of unknown function                                                                                  | prot_ID_56  | Afu8g00680 | AFUA_8G00680 |
| n/a |      | Protein of unknown function                                                                                  | prot_ID_57  | Afu8g00690 | AFUA_8G00690 |
| n/a | chi2 | Cass III chitinase<br>Domain(s) with predicted role in<br>defense response, negative<br>regulation of growth | prot_ID_58  | Afu8g00700 | AFUA_8G00700 |
| n/a |      | Putative amino acid transporter                                                                              | prot_ID_59  | Afu8g00710 | AFUA_8G00710 |
| n/a |      | Hydrolase                                                                                                    | prot_ID_60  | Afu8g00720 | AFUA_8G00720 |
| n/a |      |                                                                                                              | prot_ID_612 | Afu8g00595 | AFUA_8G00595 |

## Siderophore (sid) cluster

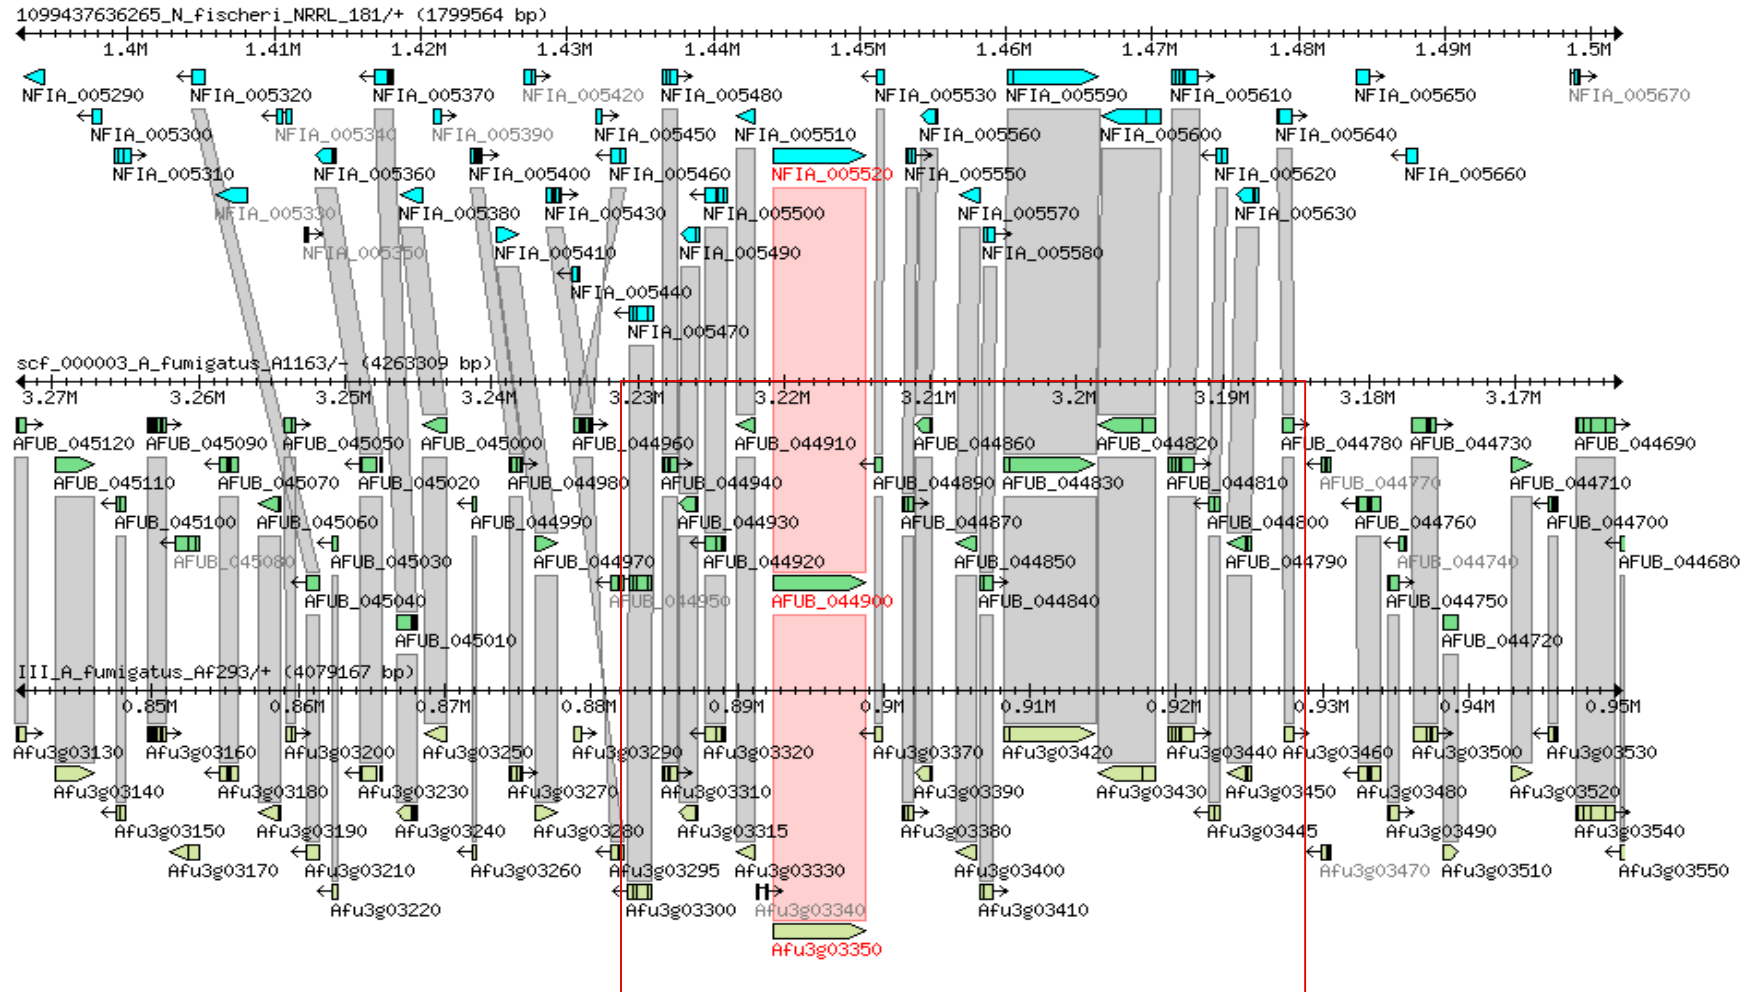

**Afu1g17200 (sidC) cluster**

| Gene id (SMURF)     | Gene positions | Gene distance | Annotated_gene_function (SMURF)                                   | AspGD gene name | AspGD supplementary annotation | antiSMASH ID        | Gene ID (I)       | Gene ID (II)            |
|---------------------|----------------|---------------|-------------------------------------------------------------------|-----------------|--------------------------------|---------------------|-------------------|-------------------------|
| n/a                 |                |               |                                                                   |                 |                                | n/a                 | Afu1g17070        | Afu1g17070              |
| AFUA_1G17080        | 12             | 247           | acetyltransferase, GNAT family, putative                          |                 |                                | n/a                 | Afu1g17080        | Afu1g17080              |
| AFUA_1G17090        | 11             | 82            | NOL1/NOP2/sun domain protein, putative                            |                 |                                | prot_ID_1541        | Afu1g17090        | AFUA_1G17090            |
| AFUA_1G17100        | 10             | 2092          | conserved hypothetical protein                                    |                 |                                | prot_ID_1542        | Afu1g17100        | AFUA_1G17100            |
| AFUA_1G17110        | 9              | 228           | long chain fatty alcohol oxidase, putative                        |                 |                                | prot_ID_1543        | Afu1g17110        | AFUA_1G17110            |
| AFUA_1G17120        | 8              | 661           | translation elongation factor eEF-1B gamma subunit, putative      |                 |                                | prot_ID_1544        | Afu1g17120        | AFUA_1G17120            |
| AFUA_1G17130        | 7              | 54            | F-box domain protein                                              |                 |                                | prot_ID_1545        | Afu1g17130        | AFUA_1G17130            |
| AFUA_1G17140        | 6              | 1204          | voltage-gated K+ channel beta subunit (KCNAB), putative           |                 |                                | prot_ID_1546        | Afu1g17140        | AFUA_1G17140            |
| AFUA_1G17150        | 5              | 73            | C6 transcription factor, putative                                 |                 |                                | prot_ID_1547        | Afu1g17150        | AFUA_1G17150            |
| AFUA_1G17160        | 4              | 895           | MFS transporter, putative                                         |                 |                                | prot_ID_1548        | Afu1g17160        | AFUA_1G17160            |
| AFUA_1G17170        | 3              | 89            | TfdA family taurine dioxygenase, putative                         |                 |                                | prot_ID_1549        | Afu1g17170        | AFUA_1G17170            |
| AFUA_1G17180        | 2              | 1352          | pyridine nucleotide-disulphide oxidoreductase AMID-like, putative |                 |                                | prot_ID_1550        | Afu1g17180        | AFUA_1G17180            |
| AFUA_1G17190        | 1              | 1728          | long-chain-fatty-acid-CoA ligase, putative                        |                 |                                | prot_ID_1551        | Afu1g17190        | AFUA_1G17190            |
| <b>AFUA_1G17200</b> | 0              | 0             | <b>nonribosomal siderophore peptide synthase SidC</b>             | <b>sidC</b>     |                                | <b>prot_ID_1552</b> | <b>Afu1g17200</b> | <b>AFUA_1G17200</b> ECS |
| AFUA_1G17210        | -1             | 1350          | conserved hypothetical protein                                    |                 |                                | prot_ID_1553        | Afu1g17210        | AFUA_1G17210            |
| AFUA_1G17220        | -2             | 781           | extracellular polygalacturonase, putative                         |                 |                                | prot_ID_1554        | Afu1g17220        | AFUA_1G17220            |
| AFUA_1G17230        | -3             | 770           | conserved hypothetical protein                                    |                 |                                | prot_ID_1555        | Afu1g17230        | AFUA_1G17230            |
| AFUA_1G17240        | -4             | 1006          | C6 transcription factor, putative                                 |                 |                                | prot_ID_1556        | Afu1g17240        | AFUA_1G17240 ECS        |
| n/a                 |                |               |                                                                   | rodB            | Conidial cell wall hydrophobin | prot_ID_1557        | Afu1g17250        | AFUA_1G17250            |
| n/a                 |                |               |                                                                   |                 | Protein of unknown function    | prot_ID_1558        | Afu1g17260        | AFUA_1G17260            |
| n/a                 |                |               |                                                                   | fre2            | Metalloreductase               | prot_ID_1559        | Afu1g17270        | AFUA_1G17270            |

## Afu1g01010 cluster

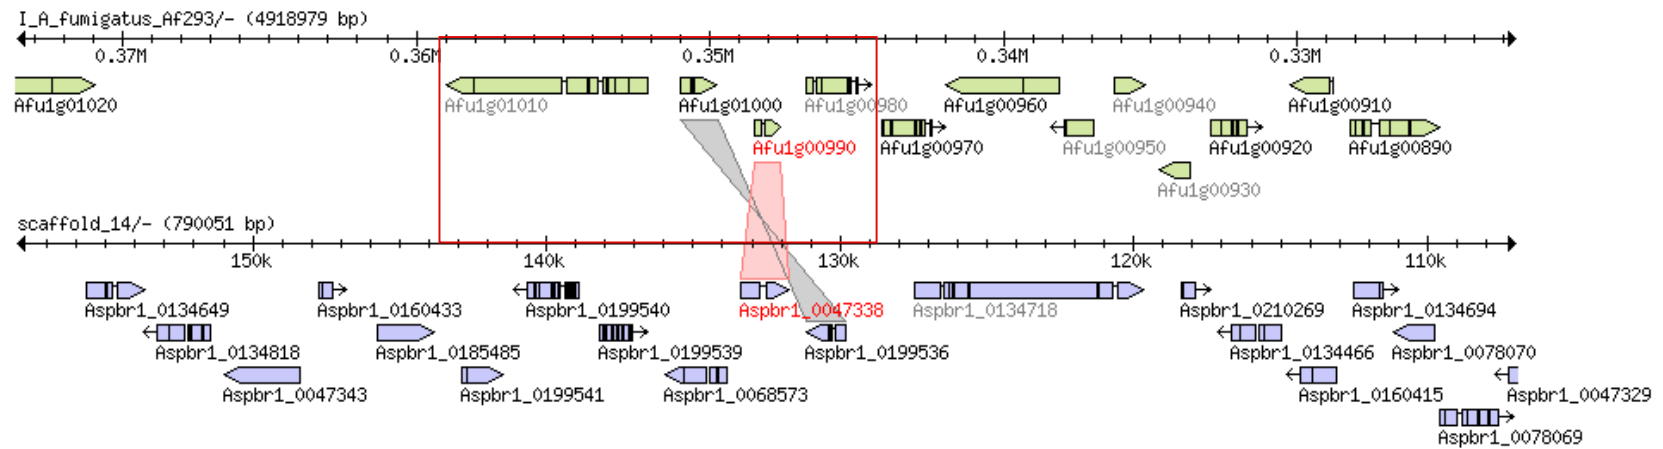

**Afu1g01010 cluster**

| Gene id (SMURF)     | Gene positions | Gene distance | Gene Annotated_gene_function (SMURF)                                               | AspGD gene name | AspGD supplementary annotation                                                     | antiSMASH ID      | Gene ID (I)       | Gene ID (II)            |
|---------------------|----------------|---------------|------------------------------------------------------------------------------------|-----------------|------------------------------------------------------------------------------------|-------------------|-------------------|-------------------------|
| AFUA_1G00970        | 4              | 800           | MFS monocarboxylate transporter, putative                                          |                 | Transmembrane transporter                                                          | prot_ID_77        | Afu1g00970        | AFUA_1G00970            |
| AFUA_1G00980        | 3              | 918           | FAD-dependent oxidase, putative short chain dehydrogenase/reductase family protein |                 | FAD-dependent oxidase, putative short chain dehydrogenase/reductase family protein | prot_ID_78        | Afu1g00980        | AFUA_1G00980 FA         |
| AFUA_1G00990        | 2              | 1220          | oxidoreductase, 2OG-Fe(II) oxygenase family                                        |                 | oxidoreductase, 2OG-Fe(II) oxygenase family                                        | prot_ID_79        | Afu1g00990        | AFUA_1G00990            |
| AFUA_1G01000        | 1              | 1041          | oxidoreductase, 2OG-Fe(II) oxygenase family                                        |                 | oxidoreductase, 2OG-Fe(II) oxygenase family                                        | prot_ID_80        | Afu1g01000        | AFUA_1G01000            |
| <b>AFUA_1G01010</b> | 0              | 0             | polyketide synthase, putative                                                      |                 | Polyketide synthase                                                                | <b>prot_ID_81</b> | <b>Afu1g01010</b> | <b>AFUA_1G01010</b> IGD |
| n/a                 |                |               |                                                                                    |                 | Protein of unknown function                                                        | prot_ID_72        | Afu1g00920        | AFUA_1G00920            |
| n/a                 |                |               |                                                                                    |                 | Protein of unknown function                                                        | prot_ID_73        | Afu1g00930        | AFUA_1G00930            |
| n/a                 |                |               |                                                                                    |                 | Mariner Ant1 transposon-related ORF                                                | prot_ID_74        | Afu1g00940        | AFUA_1G00940            |
| n/a                 |                |               |                                                                                    |                 | Protein of unknown function                                                        | prot_ID_75        | Afu1g00950        | AFUA_1G00950            |
| n/a                 |                |               |                                                                                    |                 | LINE transposon-related ORF                                                        | prot_ID_76        | Afu1g00960        | AFUA_1G00960            |
| n/a                 |                |               |                                                                                    |                 | Protein of unknown function                                                        | prot_ID_82        | Afu1g01020        | AFUA_1G01020            |
| n/a                 |                |               |                                                                                    |                 | Reverse transcriptase                                                              | prot_ID_83        | Afu1g01030        | AFUA_1G01030            |

## Afu1g10380 (nrps1/pes1) cluster

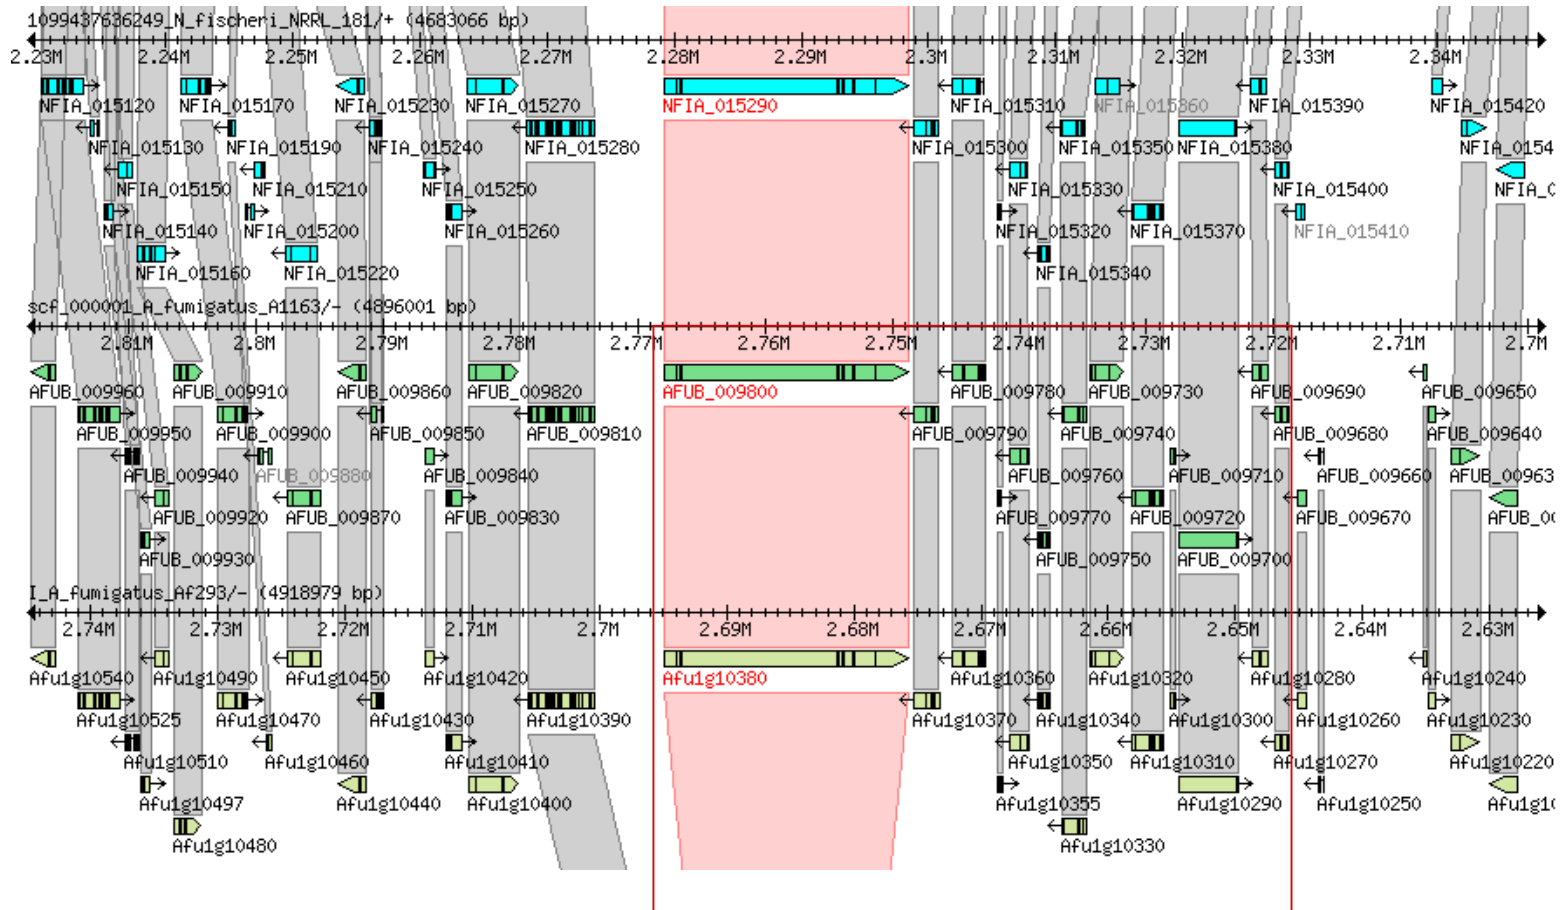

**Afu1g10380 (nrps1/pes1) cluster**

| Gene id (SMURF)     | Gene positions | Gene distance | Annotated_gene_function (SMURF)                                                                | AspGD gene name | AspGD supplementary annotation                       | antiSMASH ID | Gene ID (I) | Gene ID (II) |     |
|---------------------|----------------|---------------|------------------------------------------------------------------------------------------------|-----------------|------------------------------------------------------|--------------|-------------|--------------|-----|
| n/a                 |                |               |                                                                                                |                 | oxidoreductase                                       | n/a          | Afu1g10270  | AFUA_1G10270 | ECS |
| n/a                 |                |               |                                                                                                |                 | C2H2 finger domain protein                           | n/a          | Afu1g10280  | AFUA_1G10280 |     |
| n/a                 |                |               |                                                                                                |                 | chromodomain helicase<br>Protein of unknown function | n/a          | Afu1g10290  | AFUA_1G10290 |     |
| n/a                 |                |               |                                                                                                |                 |                                                      | n/a          | Afu1g10300  | AFUA_1G10300 |     |
| AFUA_1G10310        | 8              | 756           | RNase L inhibitor of the ABC superfamily, putative formin binding protein (FNB3), putative     |                 |                                                      | prot_ID_874  | Afu1g10310  | AFUA_1G10310 |     |
| AFUA_1G10320        | 7              | 320           |                                                                                                |                 |                                                      | prot_ID_875  | Afu1g10320  | AFUA_1G10320 |     |
| AFUA_1G10330        | 6              | 916           | conserved hypothetical protein                                                                 |                 |                                                      | prot_ID_876  | Afu1g10330  | AFUA_1G10330 |     |
| AFUA_1G10340        | 5              | 746           | integral membrane protein, Mpv17/PMP22 family, putative phosphoglycerate kinase PgkA, putative | pgkA            |                                                      | prot_ID_877  | Afu1g10340  | AFUA_1G10340 |     |
| AFUA_1G10350        | 4              | 548           |                                                                                                |                 |                                                      | prot_ID_878  | Afu1g10350  | AFUA_1G10350 |     |
| AFUA_1G10355        | 3              | 1006          | 26 proteasome complex subunit Sem1, putative                                                   |                 |                                                      | prot_ID_1627 | Afu1g10355  | AFUA_1G10355 |     |
| AFUA_1G10360        | 2              | 1064          | conserved hypothetical protein                                                                 |                 | Protein of unknown function                          | prot_ID_879  | Afu1g10360  | AFUA_1G10360 |     |
| AFUA_1G10370        | 1              | 487           | MFS multidrug transporter, putative                                                            |                 | MFS multidrug transporter                            | prot_ID_880  | Afu1g10370  | AFUA_1G10370 |     |
| <b>AFUA_1G10380</b> | 0              | 0             | nonribosomal peptide synthase Pes1                                                             | nrps1/pes1      | Non-ribosomal peptide synthetase                     | prot_ID_881  | Afu1g10380  | AFUA_1G10380 | IGD |
| n/a                 |                |               |                                                                                                | abcB            | ABC multidrug transporter                            | prot_ID_882  | Afu1g10390  | AFUA_1G10390 |     |
| n/a                 |                |               |                                                                                                |                 | Protein of unknown function                          | prot_ID_883  | Afu1g10400  | AFUA_1G10400 |     |
| n/a                 |                |               |                                                                                                |                 | DNA damage repair protein uvsC                       | prot_ID_884  | Afu1g10410  | AFUA_1G10410 |     |
| n/a                 |                |               |                                                                                                |                 | Protein of unknown function                          | prot_ID_885  | Afu1g10420  | AFUA_1G10420 |     |



## Afu1g17200 (sidC) cluster

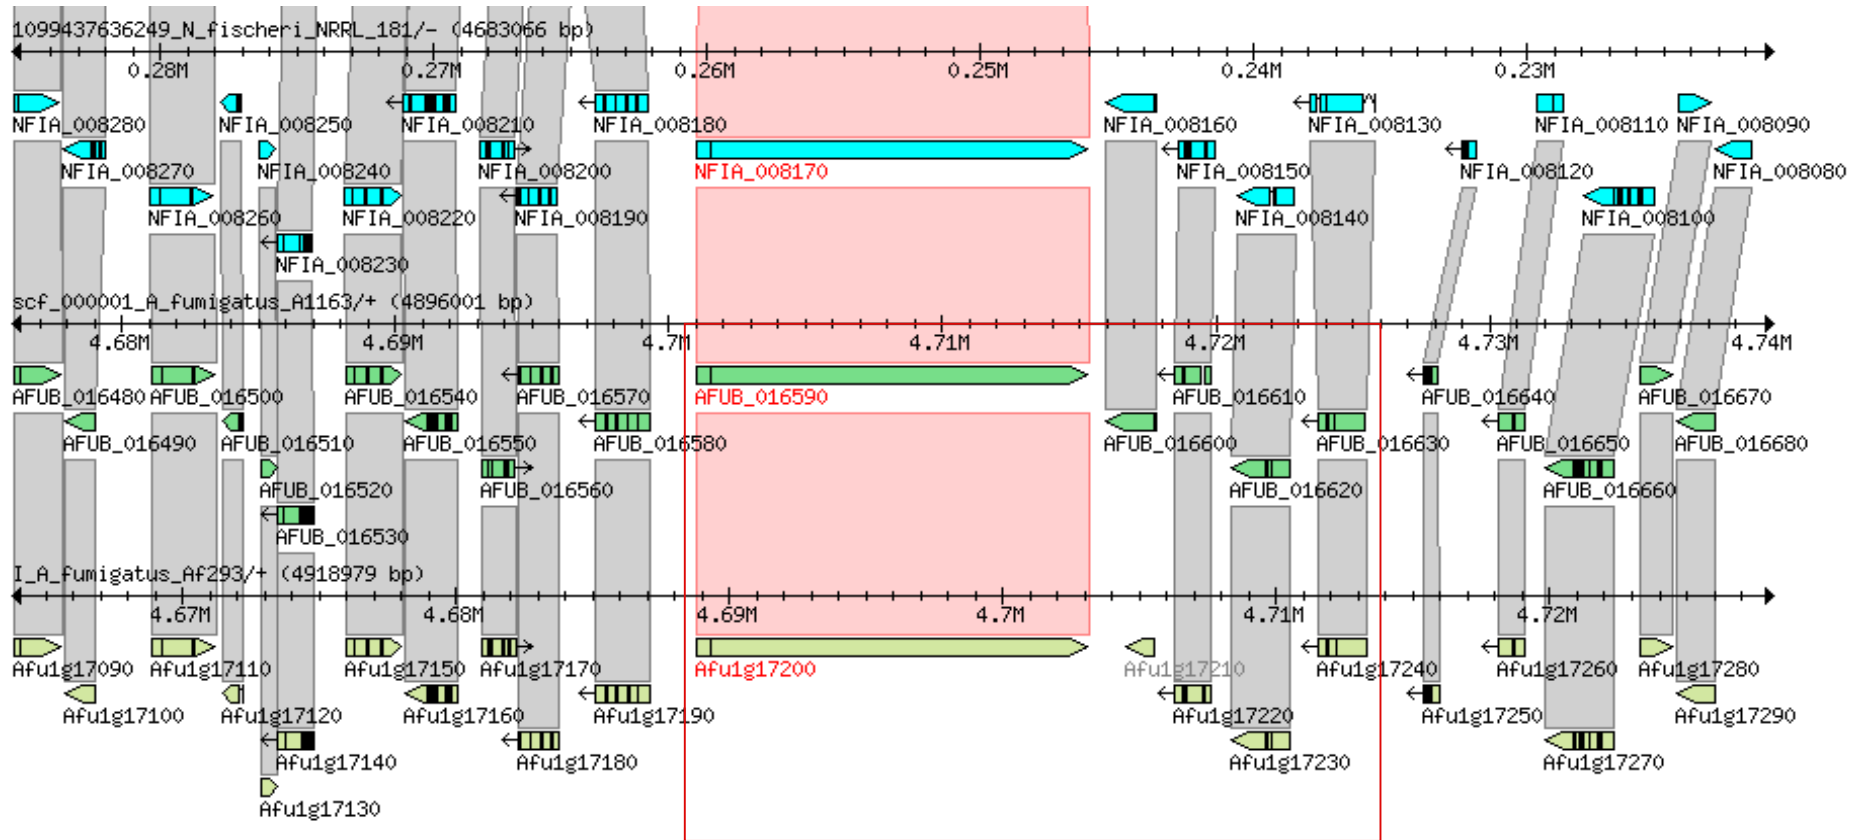

**Afu1g17200 (sidC) cluster**

| Gene id (SMURF)     | Gene positions | Gene distance | Annotated_gene_function (SMURF)                                   | AspGD gene name | AspGD supplementary annotation | antiSMASH ID        | Gene ID (I)       | Gene ID (II)            |
|---------------------|----------------|---------------|-------------------------------------------------------------------|-----------------|--------------------------------|---------------------|-------------------|-------------------------|
| n/a                 |                |               |                                                                   |                 |                                | n/a                 | Afu1g17070        | Afu1g17070              |
| AFUA_1G17080        | 12             | 247           | acetyltransferase, GNAT family, putative                          |                 |                                | n/a                 | Afu1g17080        | Afu1g17080              |
| AFUA_1G17090        | 11             | 82            | NOL1/NOP2/sun domain protein, putative                            |                 |                                | prot_ID_1541        | Afu1g17090        | AFUA_1G17090            |
| AFUA_1G17100        | 10             | 2092          | conserved hypothetical protein                                    |                 |                                | prot_ID_1542        | Afu1g17100        | AFUA_1G17100            |
| AFUA_1G17110        | 9              | 228           | long chain fatty alcohol oxidase, putative                        |                 |                                | prot_ID_1543        | Afu1g17110        | AFUA_1G17110            |
| AFUA_1G17120        | 8              | 661           | translation elongation factor eEF-1B gamma subunit, putative      |                 |                                | prot_ID_1544        | Afu1g17120        | AFUA_1G17120            |
| AFUA_1G17130        | 7              | 54            | F-box domain protein                                              |                 |                                | prot_ID_1545        | Afu1g17130        | AFUA_1G17130            |
| AFUA_1G17140        | 6              | 1204          | voltage-gated K+ channel beta subunit (KCNAB), putative           |                 |                                | prot_ID_1546        | Afu1g17140        | AFUA_1G17140            |
| AFUA_1G17150        | 5              | 73            | C6 transcription factor, putative                                 |                 |                                | prot_ID_1547        | Afu1g17150        | AFUA_1G17150            |
| AFUA_1G17160        | 4              | 895           | MFS transporter, putative                                         |                 |                                | prot_ID_1548        | Afu1g17160        | AFUA_1G17160            |
| AFUA_1G17170        | 3              | 89            | TfdA family taurine dioxygenase, putative                         |                 |                                | prot_ID_1549        | Afu1g17170        | AFUA_1G17170            |
| AFUA_1G17180        | 2              | 1352          | pyridine nucleotide-disulphide oxidoreductase AMID-like, putative |                 |                                | prot_ID_1550        | Afu1g17180        | AFUA_1G17180            |
| AFUA_1G17190        | 1              | 1728          | long-chain-fatty-acid-CoA ligase, putative                        |                 |                                | prot_ID_1551        | Afu1g17190        | AFUA_1G17190            |
| <b>AFUA_1G17200</b> | 0              | 0             | <b>nonribosomal siderophore peptide synthase SidC</b>             | <b>sidC</b>     |                                | <b>prot_ID_1552</b> | <b>Afu1g17200</b> | <b>AFUA_1G17200</b> IGD |
| AFUA_1G17210        | -1             | 1350          | conserved hypothetical protein                                    |                 |                                | prot_ID_1553        | Afu1g17210        | AFUA_1G17210            |
| AFUA_1G17220        | -2             | 781           | extracellular polygalacturonase, putative                         |                 |                                | prot_ID_1554        | Afu1g17220        | AFUA_1G17220            |
| AFUA_1G17230        | -3             | 770           | conserved hypothetical protein                                    |                 |                                | prot_ID_1555        | Afu1g17230        | AFUA_1G17230            |
| AFUA_1G17240        | -4             | 1006          | C6 transcription factor, putative                                 |                 |                                | prot_ID_1556        | Afu1g17240        | AFUA_1G17240 IGD, FA    |
| n/a                 |                |               |                                                                   | rodB            | Conidial cell wall hydrophobin | prot_ID_1557        | Afu1g17250        | AFUA_1G17250            |
| n/a                 |                |               |                                                                   |                 | Protein of unknown function    | prot_ID_1558        | Afu1g17260        | AFUA_1G17260            |
| n/a                 |                |               |                                                                   | fre2            | Metalloreductase               | prot_ID_1559        | Afu1g17270        | AFUA_1G17270            |

## Afu1g17740 cluster

No A1163 orthologous gene cluster

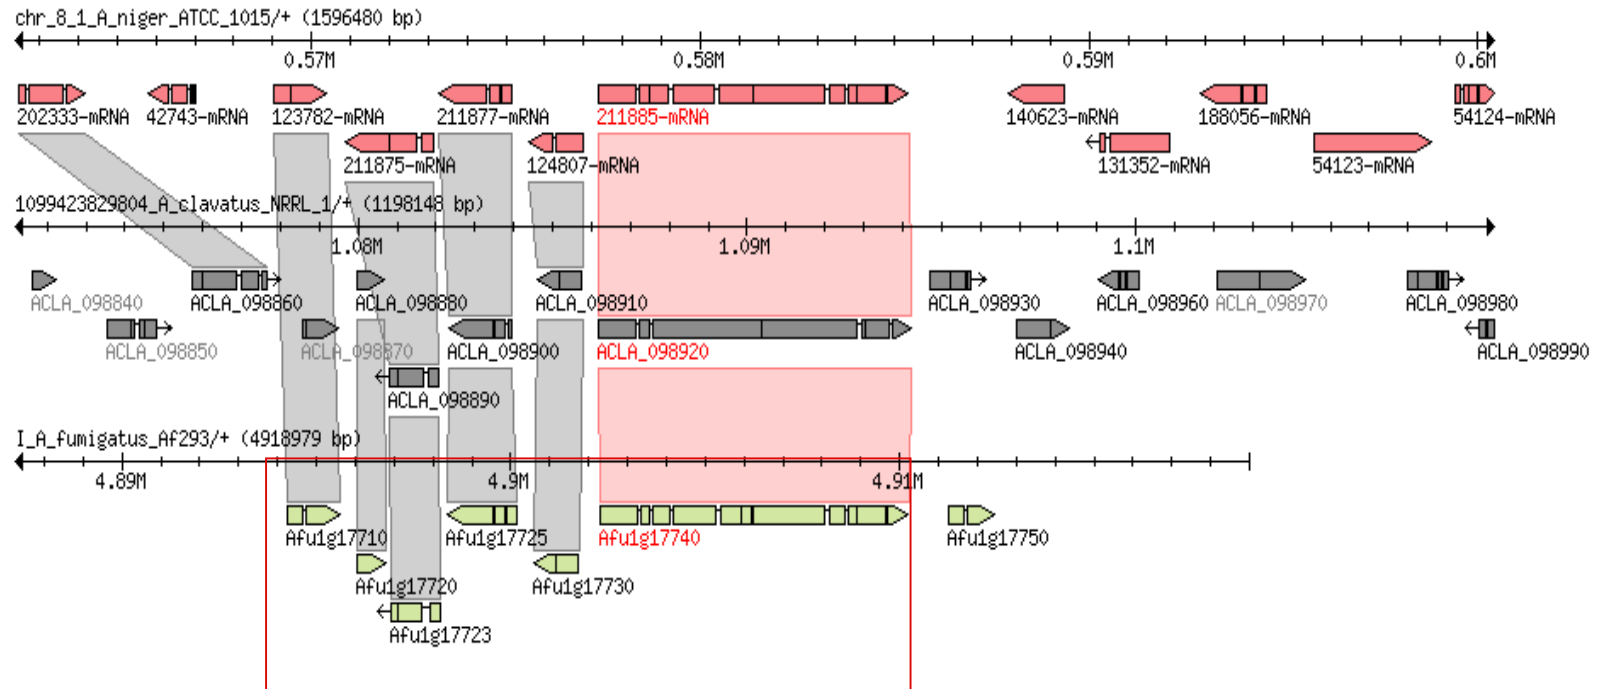

**Afu1g17740 cluster**

| Gene id (SMURF)     | Gene positions | Gene distance | Annotated_gene_function (SMURF)             | AspGD gene name | AspGD supplementary annotation             | antiSMASH ID        | Gene ID (I)       | Gene ID (II)        |     |
|---------------------|----------------|---------------|---------------------------------------------|-----------------|--------------------------------------------|---------------------|-------------------|---------------------|-----|
| AfUA_1G17710        | 5              | 442           | C6 transcription factor, putative           |                 |                                            | n/a                 | Afu1g17710        | AFUA_1G17710        | ECS |
| AfUA_1G17720        | 4              | 97            | oxidoreductase, putative                    |                 |                                            | prot_ID_1600        | Afu1g17720        | AFUA_1G17720        |     |
| AfUA_1G17723        | 3              | 188           | aldose 1-epimerase family protein, putative |                 |                                            | prot_ID_1612        | Afu1g17723        | AFUA_1G17723        |     |
| AfUA_1G17725        | 2              | 439           | cytochrome P450 oxidoreductase, putative    |                 |                                            | prot_ID_1601        | Afu1g17725        | AFUA_1G17725        |     |
| AfUA_1G17730        | 1              | 534           | zinc binding enoyl reductase, putative      |                 |                                            | prot_ID_1602        | Afu1g17730        | AFUA_1G17730        |     |
| <b>AfUA_1G17740</b> | 0              | 0             | polyketide synthase, putative               |                 |                                            | <b>prot_ID_1603</b> | <b>Afu1g17740</b> | <b>AFUA_1G17740</b> | ECS |
| n/a                 |                |               |                                             |                 | nicotinamide N-methyltransferase, putative | prot_ID_1604        | Afu1g17750        | AFUA_1G17750        |     |

## Afu2g01290 cluster

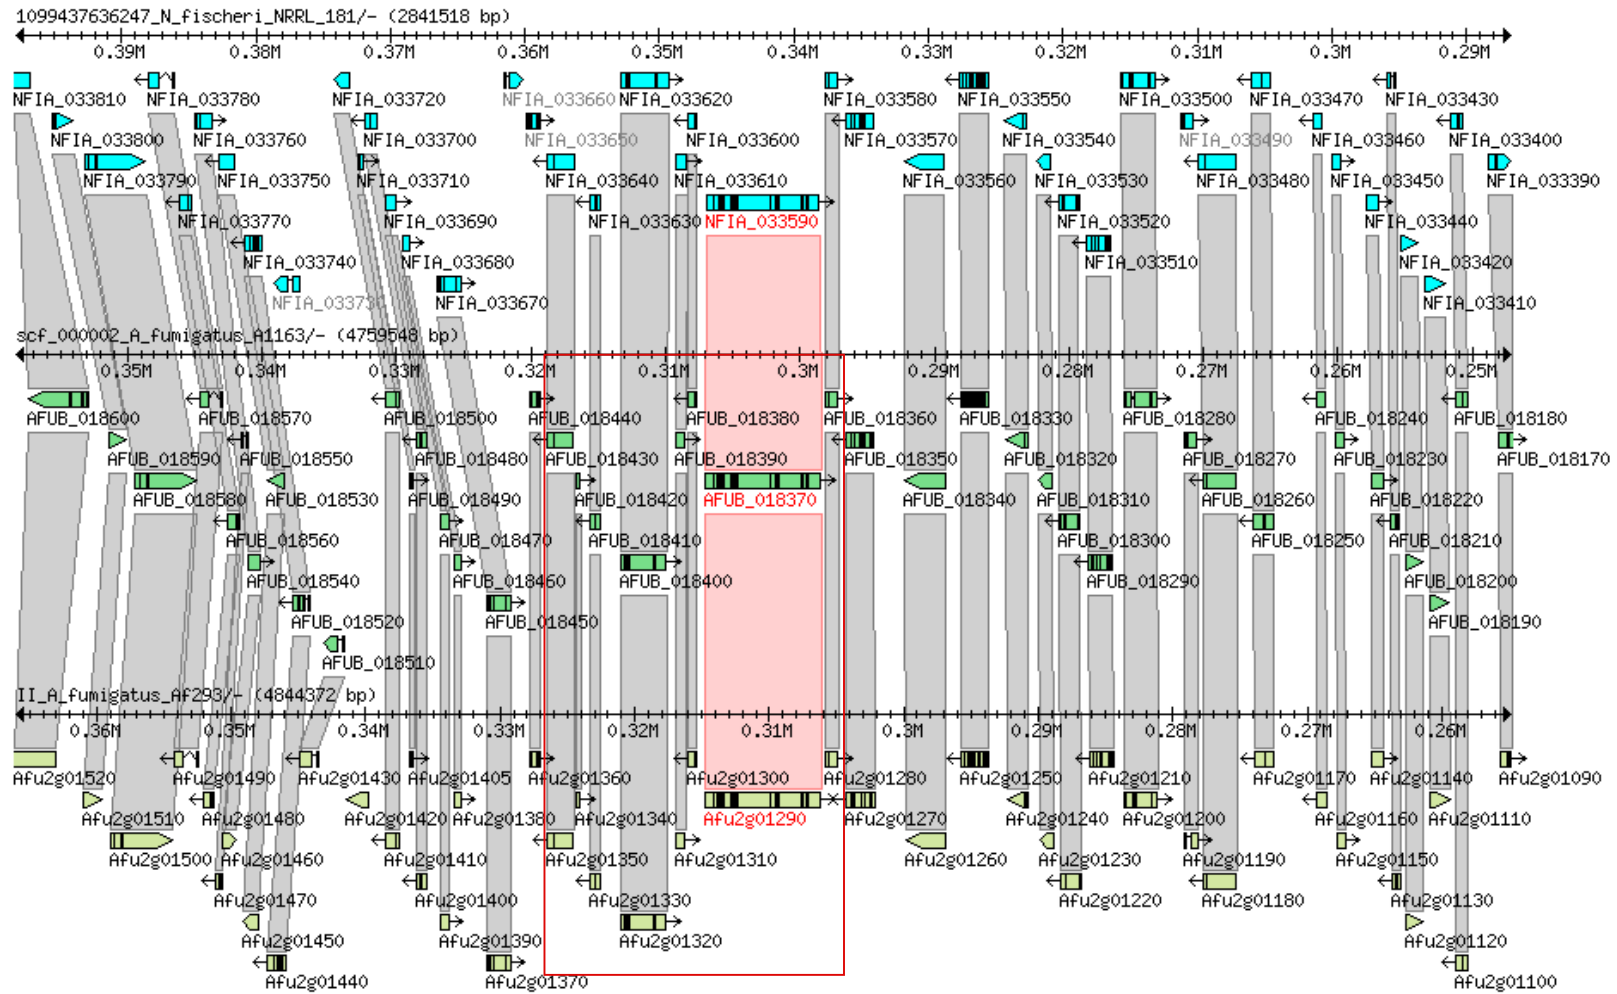

**Afu2g01290 cluster**

| Gene id (SMURF) | Gene positions | Gene distance | Annotated_gene_function (SMURF) | AspGD gene name | AspGD supplementary annotation            | antiSMASH ID       | Gene ID (I)       | Gene ID (II)        |     |
|-----------------|----------------|---------------|---------------------------------|-----------------|-------------------------------------------|--------------------|-------------------|---------------------|-----|
| n/a             |                |               |                                 |                 | ATP dependent RNA helicase                | prot_ID_109        | Afu2g01210        | AFUA_2G01210        |     |
| n/a             |                |               |                                 |                 | GTP cyclohydrolase II                     | prot_ID_110        | Afu2g01220        | AFUA_2G01220        |     |
| n/a             |                |               |                                 |                 | Predicted lyase                           | prot_ID_111        | Afu2g01230        | AFUA_2G01230        |     |
| n/a             |                |               |                                 | invB            | Predicted invertase                       | prot_ID_112        | Afu2g01240        | AFUA_2G01240        |     |
| n/a             |                |               |                                 |                 | Serine peptidase                          | prot_ID_113        | Afu2g01250        | AFUA_2G01250        |     |
| n/a             |                |               |                                 | srbA            | Sterol regulatory element binding protein | prot_ID_114        | Afu2g01260        | AFUA_2G01260        |     |
| n/a             |                |               |                                 |                 | Oxidoreductase                            | prot_ID_115        | Afu2g01270        | AFUA_2G01270        |     |
| n/a             |                |               |                                 |                 | Oxidoreductase                            | prot_ID_116        | Afu2g01280        | AFUA_2G01280        | ECS |
| n/a             |                |               |                                 |                 | Polyketide synthase                       | <b>prot_ID_117</b> | <b>Afu2g01290</b> | <b>AFUA_2G01290</b> |     |
| n/a             |                |               |                                 |                 | Protein of unknown function               | prot_ID_118        | Afu2g01300        | AFUA_2G01300        |     |
| n/a             |                |               |                                 |                 | Protein of unknown function               | prot_ID_119        | Afu2g01310        | AFUA_2G01310        |     |
| n/a             |                |               |                                 |                 | P-type ATPase                             | prot_ID_120        | Afu2g01320        | AFUA_2G01320        |     |
| n/a             |                |               |                                 |                 | Protein of unknown function               | prot_ID_121        | Afu2g01330        | AFUA_2G01330        | ECS |
| n/a             |                |               |                                 |                 | Protein of unknown function               | prot_ID_122        | Afu2g01340        | AFUA_2G01340        |     |
| n/a             |                |               |                                 |                 | NAD+/NADH kinase                          | prot_ID_123        | Afu2g01350        | AFUA_2G01350        |     |
| n/a             |                |               |                                 |                 | Methionine-R-sulfoxide reductase          | prot_ID_124        | Afu2g01360        | AFUA_2G01360        |     |
| n/a             |                |               |                                 |                 | Amino acid transmembrane transporter      | prot_ID_125        | Afu2g01370        | AFUA_2G01370        |     |
| n/a             |                |               |                                 |                 | GNAT family N-acetyltransferase           | prot_ID_126        | Afu2g01380        | AFUA_2G01380        |     |
| n/a             |                |               |                                 |                 | Trans-aconitate 3-methyltransferase       | prot_ID_127        | Afu2g01390        | AFUA_2G01390        |     |

# Afu2g05760 cluster

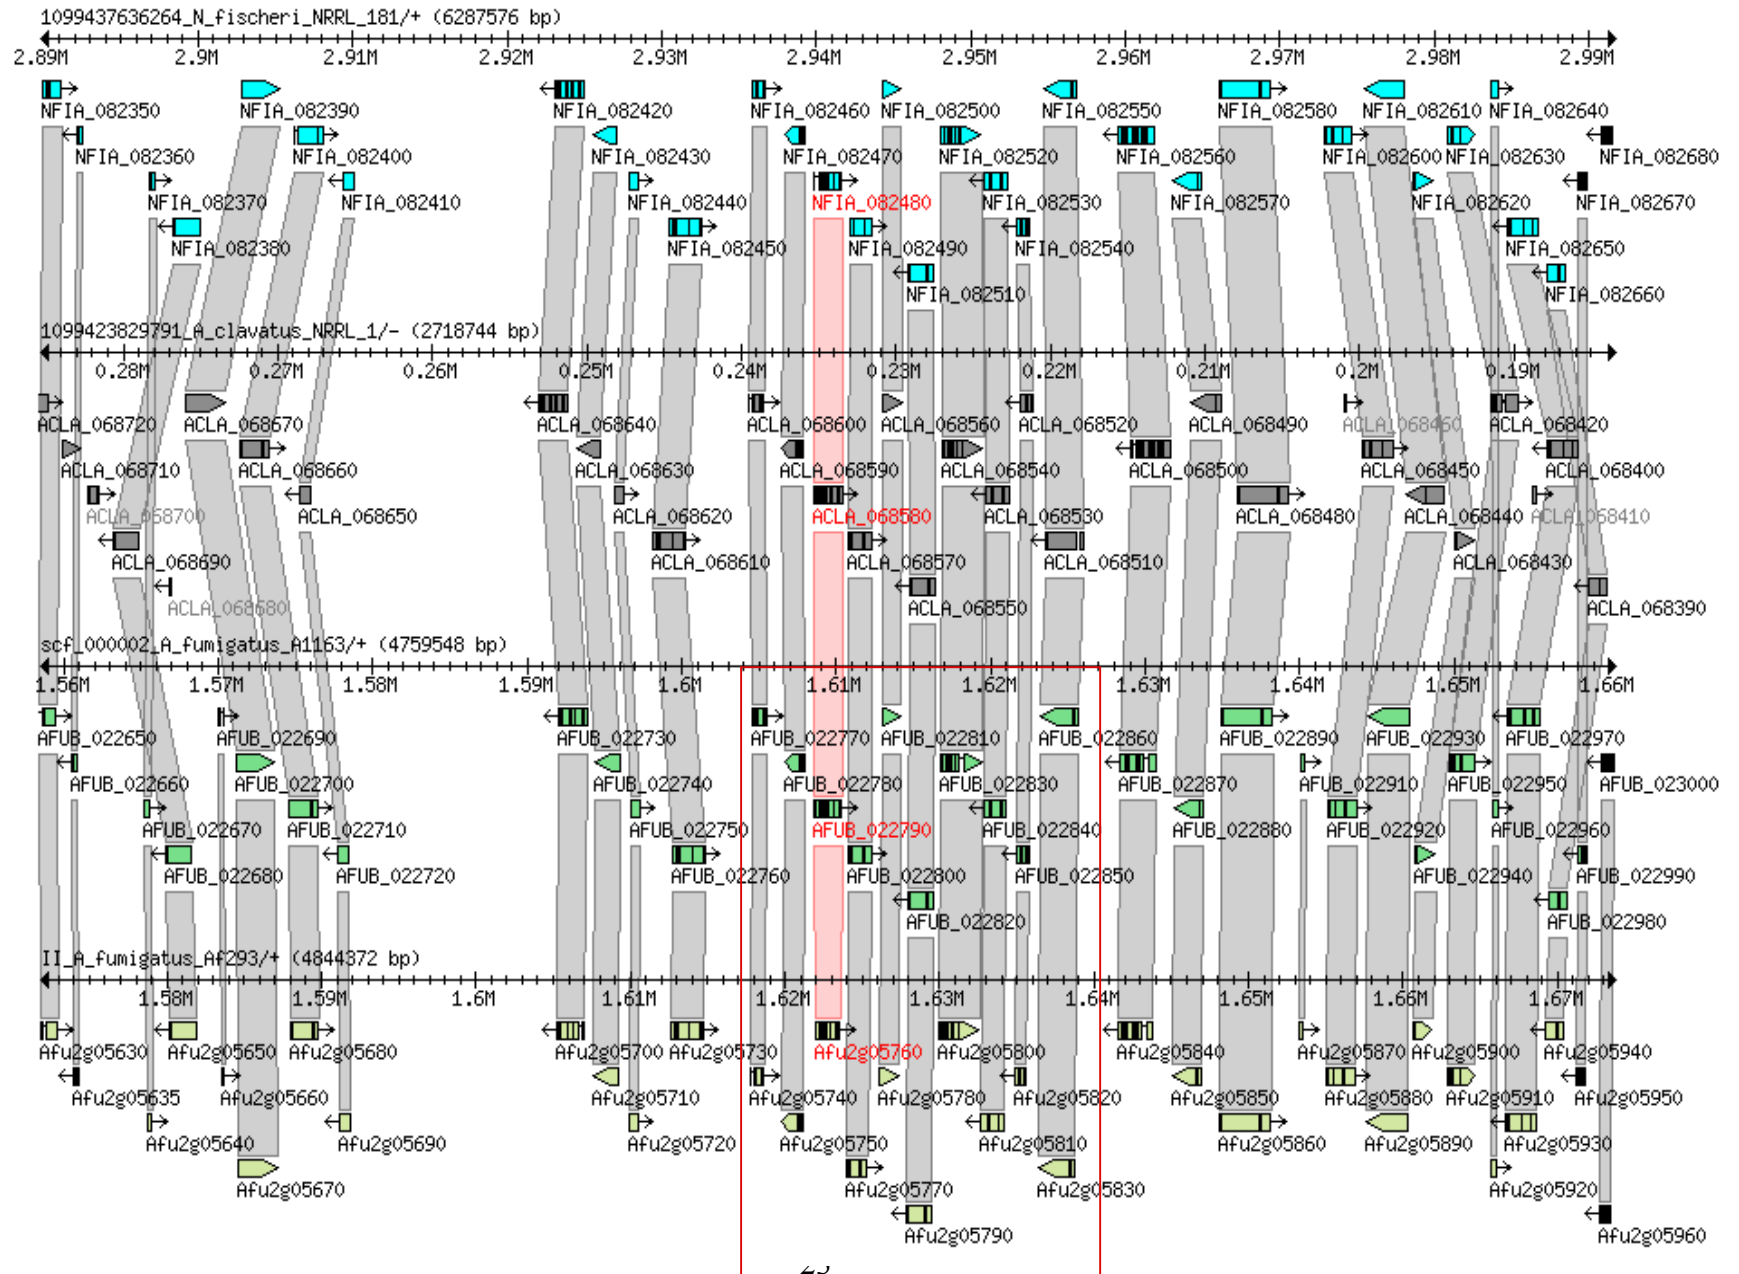

**Afu2g05760 cluster**

| Gene id (SMURF)     | Gene positions | Gene distance | Annotated_gene_function (SMURF)                                | AspGD gene name | AspGD supplementary annotation | antiSMASH ID | Gene ID (I)       | Gene ID (II)        |
|---------------------|----------------|---------------|----------------------------------------------------------------|-----------------|--------------------------------|--------------|-------------------|---------------------|
| AfUA_2G05730        | 3              | 3096          | siderochrome-iron transporter MirC                             |                 |                                | n/a          | Afu2g05730        | AFUA_2G05730        |
| AfUA_2G05740        | 2              | 1079          | Rho GTPase ModA, putative                                      |                 |                                | n/a          | Afu2g05740        | AFUA_2G05740 IGD    |
| AfUA_2G05750        | 1              | 805           | agmatinase, putative beta-ketoacyl synthase (Cem1), putative   |                 |                                | n/a          | Afu2g05750        | AFUA_2G05750        |
| <b>AFUA_2G05760</b> | 0              | 0             |                                                                |                 |                                | n/a          | <b>Afu2g05760</b> | <b>AFUA_2G05760</b> |
| AfUA_2G05770        | -1             | 382           | SAGA complex component (Sgf73), putative                       |                 |                                | n/a          | Afu2g05770        | AFUA_2G05770        |
| AfUA_2G05780        | -2             | 701           | mRNA capping enzyme alpha subunit, putative                    |                 |                                | n/a          | Afu2g05780        | AFUA_2G05780        |
| AfUA_2G05790        | -3             | 418           | oligosaccharyl transferase subunit (alpha), putative           |                 |                                | n/a          | Afu2g05790        | AFUA_2G05790        |
| AfUA_2G05800        | -4             | 433           | IdgA domain protein                                            |                 |                                | n/a          | Afu2g05800        | AFUA_2G05800        |
| AfUA_2G05810        | -5             | 62            | dienelactone hydrolase                                         |                 |                                | n/a          | Afu2g05810        | AFUA_2G05810        |
| AfUA_2G05820        | -6             | 638           | Riboflavin kinase, putative C6 finger domain protein, putative |                 |                                | n/a          | Afu2g05820        | AFUA_2G05820        |
| AfUA_2G05830        | -7             | 819           | MFS multidrug transporter, putative                            |                 |                                | n/a          | Afu2g05830        | AFUA_2G05830 IGD    |
| AfUA_2G05840        | -8             | 2789          |                                                                |                 |                                | n/a          | Afu2g05840        | AFUA_2G05840        |



# Afu2g17600 cluster

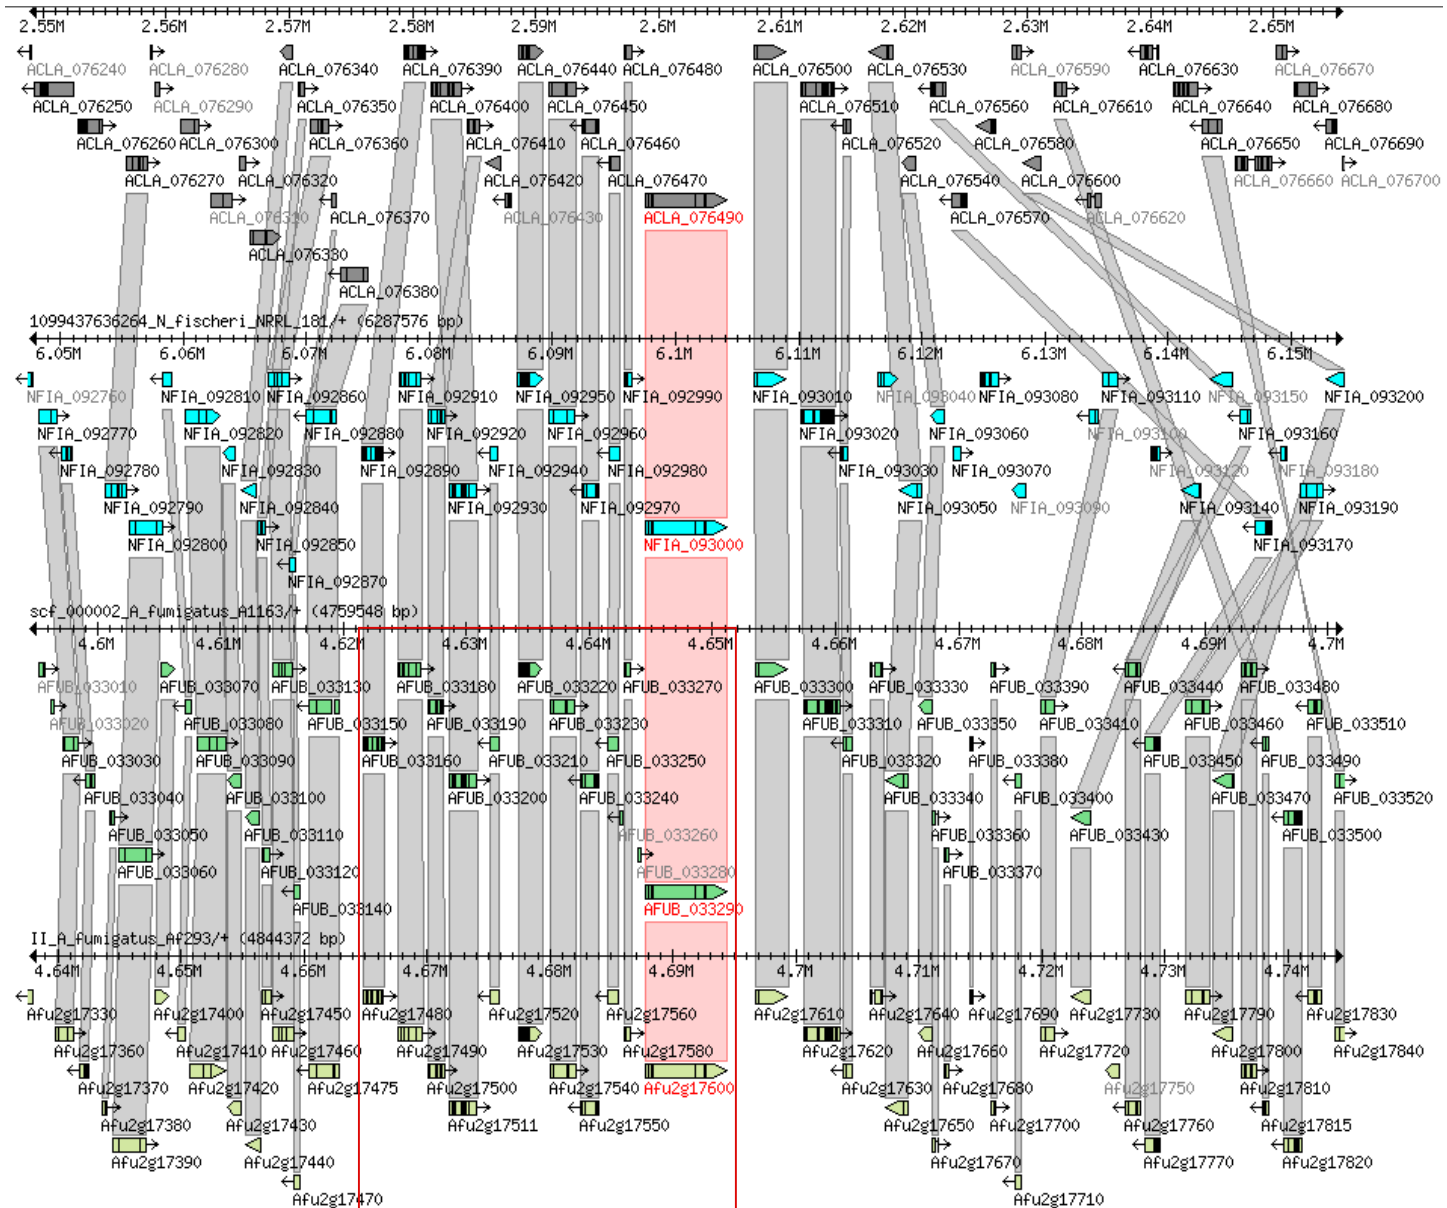

**Afu2g17600 cluster**

| Gene id (SMURF)     | Gene positions | Gene distance | Annotated_gene_function (SMURF)                                              | AspGD gene name | AspGD supplementary annotation                            | antiSMASH ID        | Gene ID (I)       | Gene ID (II)        |     |
|---------------------|----------------|---------------|------------------------------------------------------------------------------|-----------------|-----------------------------------------------------------|---------------------|-------------------|---------------------|-----|
| n/a                 |                |               |                                                                              |                 | Protein of unknown function                               | n/a                 | Afu2g17480        | AFUA_2G17480        | IGD |
| n/a                 |                |               |                                                                              |                 | N,N-dimethylaniline monooxygenase                         | prot_ID_1545        | Afu2g17490        | AFUA_2G17490        |     |
| n/a                 |                |               |                                                                              |                 | Nitrilase                                                 | prot_ID_1546        | Afu2g17500        | AFUA_2G17500        |     |
| AFUA_2G17511        | 7              | 1019          | C6 finger domain protein, putative                                           |                 |                                                           |                     |                   |                     |     |
| AFUA_2G17520        | 6              | 1578          | GNAT family N-acetyltransferase, putative                                    |                 |                                                           | prot_ID_1547        | Afu2g17520        | AFUA_2G17520        |     |
| AFUA_2G17530        | 5              | 506           | conidial pigment biosynthesis oxidase Arb2                                   | arb2            |                                                           | prot_ID_1548        | Afu2g17530        | AFUA_2G17530        |     |
| AFUA_2G17540        | 4              | 421           | conidial pigment biosynthesis oxidase Abr1/brown 1                           |                 |                                                           | prot_ID_1549        | Afu2g17540        | AFUA_2G17540        |     |
| AFUA_2G17550        | 3              | 837           | conidial pigment biosynthesis protein Ayg1                                   | ayg1            |                                                           | prot_ID_1550        | Afu2g17550        | AFUA_2G17550        |     |
| AFUA_2G17560        | 2              | 464           | conidial pigment biosynthesis 1,3,6,8-tetrahydroxynaphthalene reductase Arp2 |                 |                                                           | prot_ID_1551        | Afu2g17560        | AFUA_2G17560        |     |
| AFUA_2G17580        | 1              | 1098          | conidial pigment biosynthesis scytalone dehydratase Arp1                     | arp1            |                                                           | prot_ID_1552        | Afu2g17580        | AFUA_2G17580        |     |
| <b>AFUA_2G17600</b> | 0              | 0             | conidial pigment polyketide synthase PksP/Alb1                               | pksP/alb1       |                                                           | <b>prot_ID_1553</b> | <b>Afu2g17600</b> | <b>AFUA_2G17600</b> | IGD |
| n/a                 |                |               |                                                                              |                 |                                                           | prot_ID_1554        | Afu2g17610        | AFUA_2G17610        |     |
| n/a                 |                |               |                                                                              |                 | Cellulose dehydrogenase                                   |                     |                   |                     |     |
| n/a                 |                |               |                                                                              |                 | CDH cytochrome superfamily, secreted                      | prot_ID_1555        | Afu2g17620        | AFUA_2G17620        |     |
| n/a                 |                |               |                                                                              |                 | Ortholog of the hydrophobic surface binding protein, hsbA | prot_ID_1556        | Afu2g17630        | AFUA_2G17630        |     |
| n/a                 |                |               |                                                                              |                 | Protein of unknown function                               | prot_ID_1557        | Afu2g17640        | AFUA_2G17640        |     |
| n/a                 |                |               |                                                                              |                 | Protein of unknown function                               | prot_ID_1558        | Afu2g17650        | AFUA_2G17650        |     |
| n/a                 |                |               |                                                                              |                 | Transmembrane transporter                                 | prot_ID_1559        | Afu2g17660        | AFUA_2G17660        |     |
| n/a                 |                |               |                                                                              |                 | Protein of unknown function                               | prot_ID_1560        | Afu2g17670        | AFUA_2G17670        |     |
| n/a                 |                |               |                                                                              |                 | Protein of unknown function                               | prot_ID_1561        | Afu2g17680        | AFUA_2G17680        |     |
| n/a                 |                |               |                                                                              |                 | Protein of unknown function                               | prot_ID_1562        | Afu2g17690        | AFUA_2G17690        |     |

## Afu3g01410 cluster

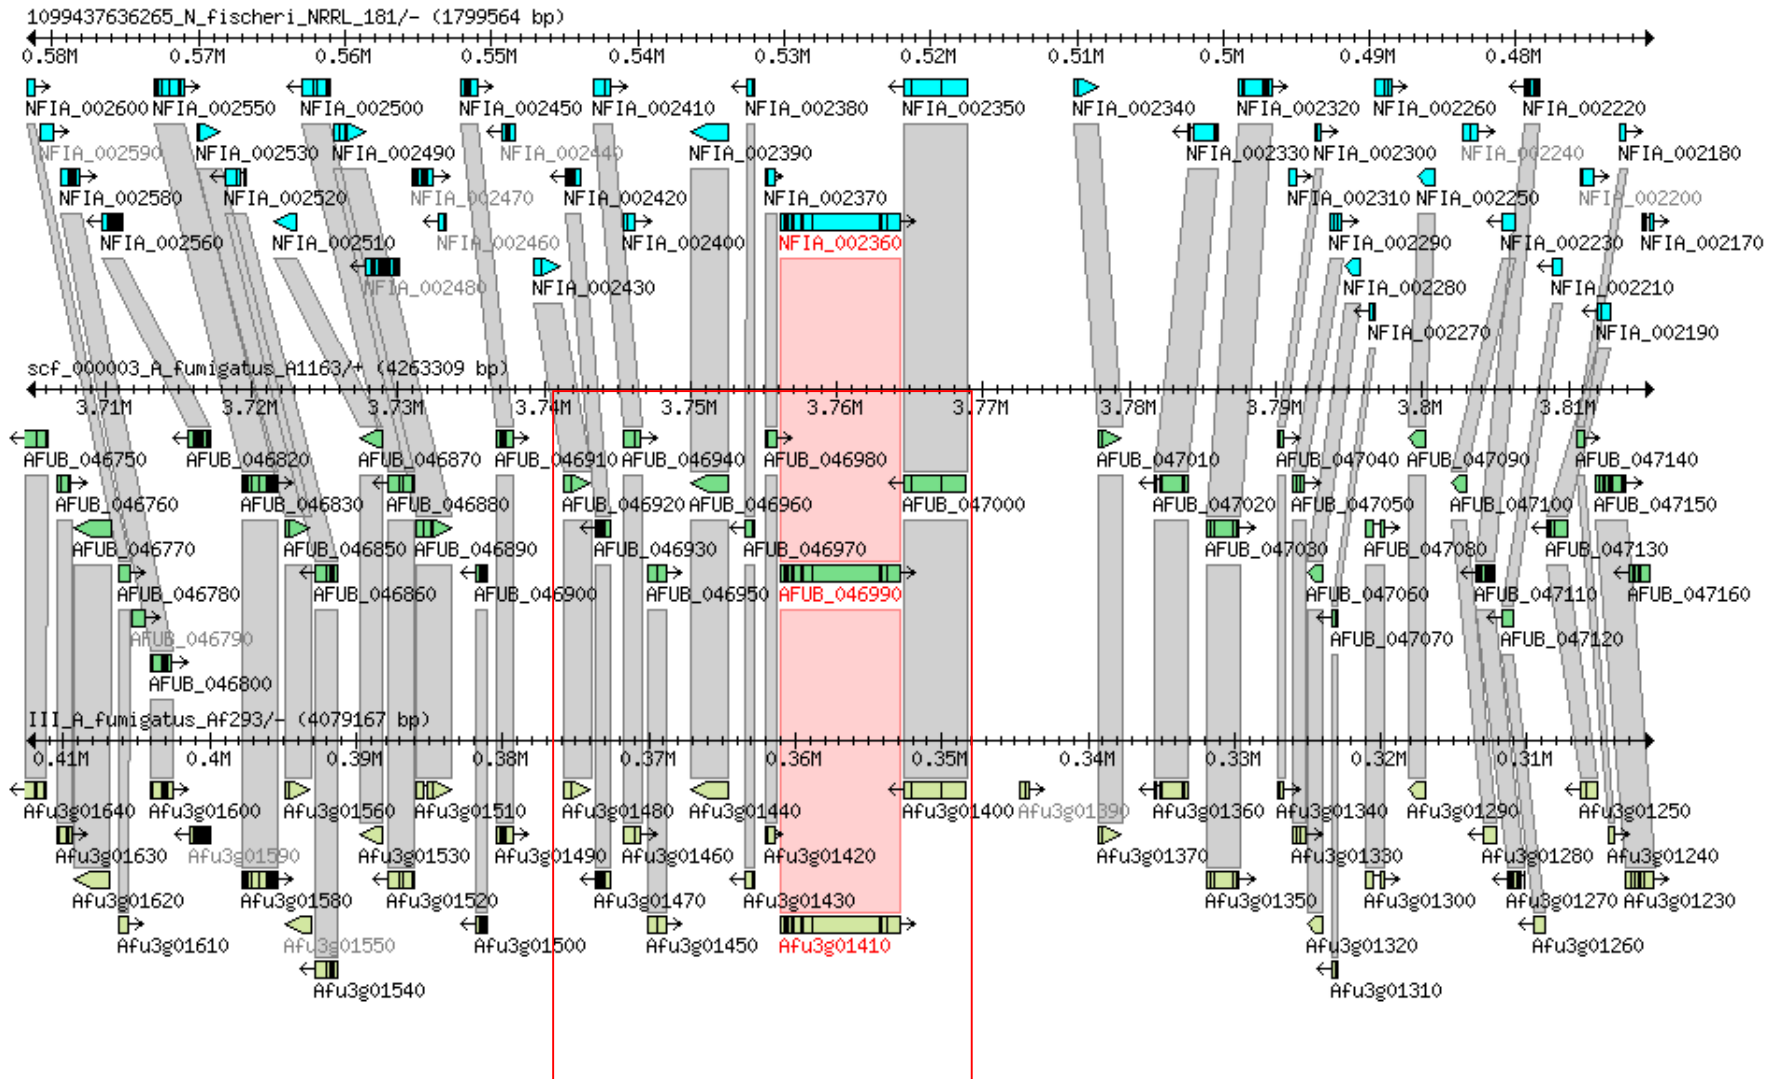

**Afu3g01410 cluster**

| Gene id (SMURF)     | Gene positions | Gene distance | Annotated_gene_function (SMURF)                       | AspGD gene name | AspGD supplementary annotation | antiSMASH ID       | Gene ID (I)       | Gene ID (II)        |
|---------------------|----------------|---------------|-------------------------------------------------------|-----------------|--------------------------------|--------------------|-------------------|---------------------|
| n/a                 |                |               |                                                       |                 | Transmembrane transporter      | prot_ID_119        | Afu3g01360        | AFUA_3G01360        |
| n/a                 |                |               |                                                       |                 | Transmembrane transporter      | prot_ID_120        | Afu3g01370        | AFUA_3G01370        |
| n/a                 |                |               |                                                       |                 | Protein of unknown function    | prot_ID_121        | Afu3g01390        | AFUA_3G01390        |
| AFUA_3G01400        | 1              | 235           | ABC multidrug transporter, putative                   |                 |                                | prot_ID_122        | Afu3g01400        | AFUA_3G01400 IGD    |
| <b>AFUA_3G01410</b> | 0              | 0             | polyketide synthase, putative                         |                 |                                | <b>prot_ID_123</b> | <b>Afu3g01410</b> | <b>AFUA_3G01410</b> |
| AFUA_3G01420        | -1             | 291           | DUF341 family oxidoreductase, putative                |                 |                                | prot_ID_124        | Afu3g01420        | AFUA_3G01420        |
| AFUA_3G01430        | -2             | 716           | benzodiazepine receptor family protein                |                 |                                | prot_ID_125        | Afu3g01430        | AFUA_3G01430        |
| AFUA_3G01440        | -3             | 1240          | DUF1212 domain membrane protein                       |                 |                                | prot_ID_126        | Afu3g01440        | AFUA_3G01440        |
| AFUA_3G01450        | -4             | 1576          | 3-methyl-2-oxobutanoate dehydrogenase, putative       |                 |                                | prot_ID_127        | Afu3g01450        | AFUA_3G01450        |
| AFUA_3G01460        | -5             | 388           | salicylate hydroxylase, putative                      |                 |                                | prot_ID_128        | Afu3g01460        | AFUA_3G01460        |
| AFUA_3G01470        | -6             | 914           | conserved hypothetical protein                        |                 |                                | prot_ID_129        | Afu3g01470        | AFUA_3G01470        |
| AFUA_3G01480        | -7             | 223           | conserved hypothetical protein                        |                 |                                | prot_ID_130        | Afu3g01480        | AFUA_3G01480 IGD    |
| AFUA_3G01490        | -8             | 3415          | alcohol dehydrogenase, putative                       |                 |                                | prot_ID_131        | Afu3g01490        | AFUA_3G01490        |
| AFUA_3G01500        | -9             | 667           | integral membrane protein                             |                 |                                | n/a                | Afu3g01500        | AFUA_3G01500        |
| AFUA_3G01510        | -10            | 1580          | C6 transcription factor, putative                     |                 |                                | n/a                | Afu3g01510        | AFUA_3G01510        |
| AFUA_3G01520        | -11            | 115           | MFS multidrug transporter, putative                   |                 |                                | n/a                | Afu3g01520        | AFUA_3G01520        |
| AFUA_3G01530        | -12            | 408           | phosphatidylglycerol specific phospholipase, putative |                 |                                | n/a                | Afu3g01530        | AFUA_3G01530        |
| AFUA_3G01540        | -13            | 1642          | MFS monocarboxylate transporter, putative             |                 |                                | n/a                | Afu3g01540        | AFUA_3G01540        |
| AFUA_3G01560        | -14            | 190           | amino acid permease (Can1), putative                  |                 |                                | n/a                | Afu3g01560        | AFUA_3G01560        |

# Afu3g02530 cluster

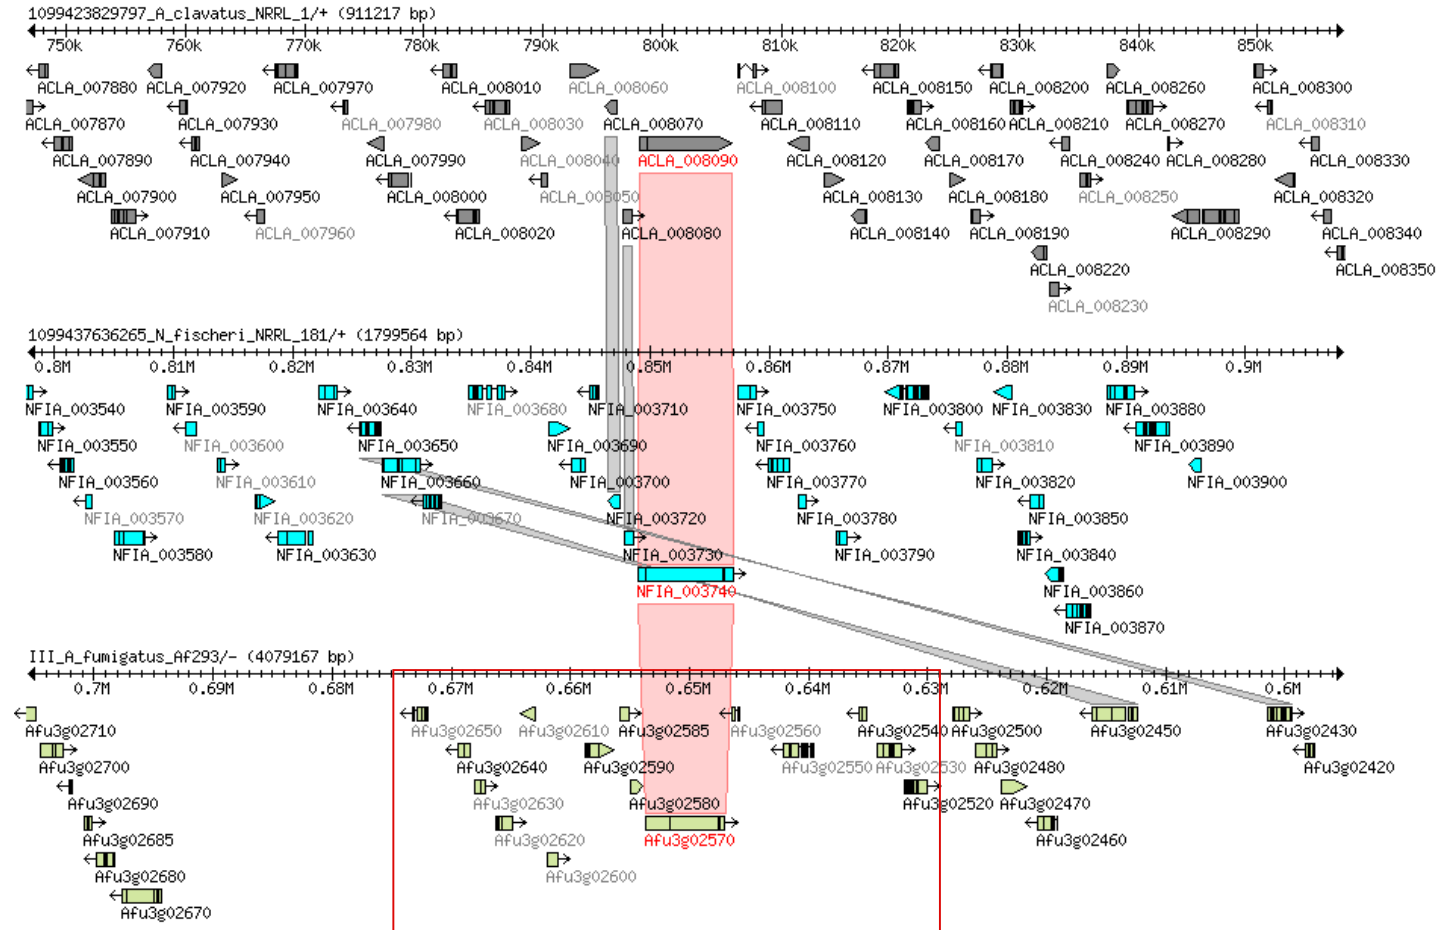

**Afu3g02530 cluster**

| Gene id (SMURF)     | Gene positions | Gene distance | Annotated_gene_function (SMURF)     | AspGD gene name | AspGD supplementary annotation | antiSMASH ID       | Gene ID (I)       | Gene ID (II)        |     |
|---------------------|----------------|---------------|-------------------------------------|-----------------|--------------------------------|--------------------|-------------------|---------------------|-----|
| AfUA_3G02450        | 6              | 2900          | conserved hypothetical protein      |                 |                                | prot_ID_220        | Afu3g02450        | AFUA_3G02450        |     |
| AfUA_3G02460        | 5              | 895           | serine protein kinase, putative     |                 |                                | prot_ID_221        | Afu3g02460        | AFUA_3G02460        |     |
| AfUA_3G02470        | 4              | 396           | amidase family protein              |                 |                                | prot_ID_222        | Afu3g02470        | AFUA_3G02470        |     |
| AfUA_3G02480        | 3              | 499           | C6 transcription factor, putative   |                 |                                | prot_ID_223        | Afu3g02480        | AFUA_3G02480        |     |
| AfUA_3G02500        | 2              | 2022          | protein kinase, putative            |                 |                                | prot_ID_224        | Afu3g02500        | AFUA_3G02500        |     |
| AfUA_3G02520        | 1              | 48            | MFS multidrug transporter, putative |                 |                                | prot_ID_225        | Afu3g02520        | AFUA_3G02520        | FA  |
| <b>AFUA_3G02530</b> | 0              | 0             | PKS-like enzyme, putative           |                 |                                | prot_ID_226        | Afu3g02530        | AFUA_3G02530        |     |
| AfUA_3G02540        | -1             | 867           | conserved hypothetical protein      |                 |                                | prot_ID_227        | Afu3g02540        | AFUA_3G02540        |     |
| n/a                 |                |               |                                     |                 | Polyketide synthase            | <b>prot_ID_228</b> | <b>Afu3g02550</b> | <b>AFUA_3G02550</b> |     |
| n/a                 |                |               |                                     |                 | Protein of unknown function    | prot_ID_229        | Afu3g02560        | AFUA_3G02560        |     |
| n/a                 |                |               |                                     |                 | Polyketide synthase            | <b>prot_ID_230</b> | <b>Afu3g02570</b> | <b>AFUA_3G02570</b> |     |
| n/a                 |                |               |                                     |                 | Oxidoreductase                 | prot_ID_231        | Afu3g02580        | AFUA_3G02580        |     |
| n/a                 |                |               |                                     |                 | Protein of unknown function    | prot_ID_232        | Afu3g02585        | AFUA_3G02585        |     |
| n/a                 |                |               |                                     |                 | C6 transcription factor        | prot_ID_233        | Afu3g02590        | AFUA_3G02590        |     |
| n/a                 |                |               |                                     |                 | Protein of unknown function    | prot_ID_234        | Afu3g02600        | AFUA_3G02600        |     |
| n/a                 |                |               |                                     |                 | Transmembrane transporter      | prot_ID_235        | Afu3g02610        | AFUA_3G02610        |     |
| n/a                 |                |               |                                     |                 | Monoxygenase                   | prot_ID_236        | Afu3g02620        | AFUA_3G02620        |     |
| n/a                 |                |               |                                     |                 | Protein of unknown function    | prot_ID_237        | Afu3g02630        | AFUA_3G02630        |     |
| n/a                 |                |               |                                     |                 | Protein of unknown function    | prot_ID_238        | Afu3g02640        | AFUA_3G02640        |     |
| n/a                 |                |               |                                     |                 | MYB DNA binding domain protein | prot_ID_239        | Afu3g02650        | AFUA_3G02650        | IGD |

# Afu3g02570 cluster

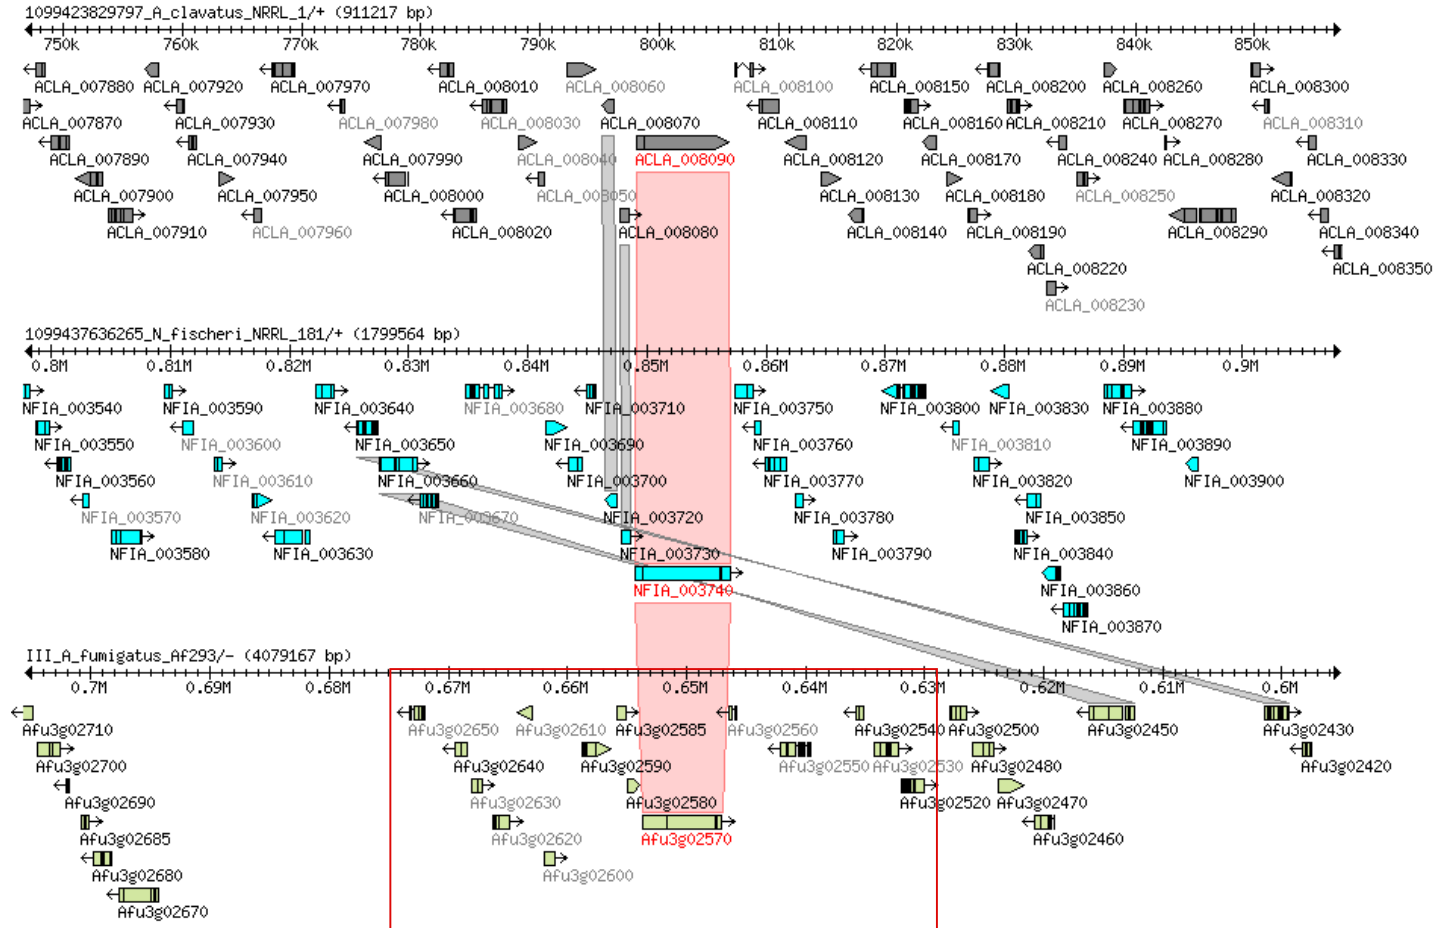

**Afu3g02570 cluster**

| Gene id (SMURF)     | Gene positions | Gene distance | Annotated_gene_function (SMURF)                                                            | AspGD gene name | AspGD supplementary annotation        | antiSMASH ID       | Gene ID (I)       | Gene ID (II)        |
|---------------------|----------------|---------------|--------------------------------------------------------------------------------------------|-----------------|---------------------------------------|--------------------|-------------------|---------------------|
| n/a                 |                |               |                                                                                            |                 | Protein of unknown function           | prot_ID_220        | Afu3g02450        | AFUA_3G02450        |
| n/a                 |                |               |                                                                                            |                 | Protein serine/threonine kinase       | prot_ID_221        | Afu3g02460        | AFUA_3G02460        |
| n/a                 |                |               |                                                                                            |                 | Carbon-nitrogen ligase                | prot_ID_222        | Afu3g02470        | AFUA_3G02470        |
| n/a                 |                |               |                                                                                            |                 | C6 transcription factor               | prot_ID_223        | Afu3g02480        | AFUA_3G02480        |
| n/a                 |                |               |                                                                                            |                 | Predicted ATP binding, protein kinase | prot_ID_224        | Afu3g02500        | AFUA_3G02500        |
| n/a                 |                |               |                                                                                            |                 | Transmembrane transporter             | prot_ID_225        | Afu3g02520        | AFUA_3G02520 FA     |
| n/a                 |                |               |                                                                                            |                 | polyketide synthase                   | <b>prot_ID_226</b> | <b>Afu3g02530</b> | <b>AFUA_3G02530</b> |
| n/a                 |                |               |                                                                                            |                 | Protein of unknown function           | prot_ID_227        | Afu3g02540        | AFUA_3G02540        |
| n/a                 |                |               |                                                                                            |                 | Protein of unknown function           | prot_ID_228        | Afu3g02550        | AFUA_3G02550        |
| n/a                 |                |               |                                                                                            |                 | Deleted ORF                           | prot_ID_229        | Afu3g02560        | AFUA_3G02560        |
| <b>AFUA_3G02570</b> | 0              | 0             | polyketide synthase, putative short-chain dehydrogenase/reductase family protein, putative |                 |                                       | <b>prot_ID_230</b> | <b>Afu3g02570</b> | <b>AFUA_3G02570</b> |
| AFUA_3G02580        | -1             | 198           | integral membrane protein                                                                  |                 |                                       | prot_ID_231        | Afu3g02580        | AFUA_3G02580        |
| AFUA_3G02585        | -2             | 218           | C6 transcription factor, putative                                                          |                 |                                       | prot_ID_232        | Afu3g02585        | AFUA_3G02585        |
| AFUA_3G02590        | -3             | 315           | conserved hypothetical protein                                                             |                 |                                       | prot_ID_233        | Afu3g02590        | AFUA_3G02590        |
| AFUA_3G02600        | -4             | 2323          | MFS transporter, putative                                                                  |                 |                                       | prot_ID_234        | Afu3g02600        | AFUA_3G02600        |
| AFUA_3G02610        | -5             | 1097          | phenol hydroxylase, putative                                                               |                 |                                       | prot_ID_235        | Afu3g02610        | AFUA_3G02610        |
| AFUA_3G02620        | -6             | 427           | conserved hypothetical protein                                                             |                 |                                       | prot_ID_236        | Afu3g02620        | AFUA_3G02620        |
| AFUA_3G02630        | -7             | 823           | nucleoside-diphosphate-sugar epimerase family protein                                      |                 |                                       | prot_ID_237        | Afu3g02630        | AFUA_3G02630        |
| AFUA_3G02640        | -8             | 413           | MYB DNA binding domain protein                                                             |                 |                                       | prot_ID_238        | Afu3g02640        | AFUA_3G02640        |
| AFUA_3G02650        | -9             | 2556          |                                                                                            |                 |                                       | prot_ID_239        | Afu3g02650        | AFUA_3G02650 IGD    |



# Afu3g02670 cluster

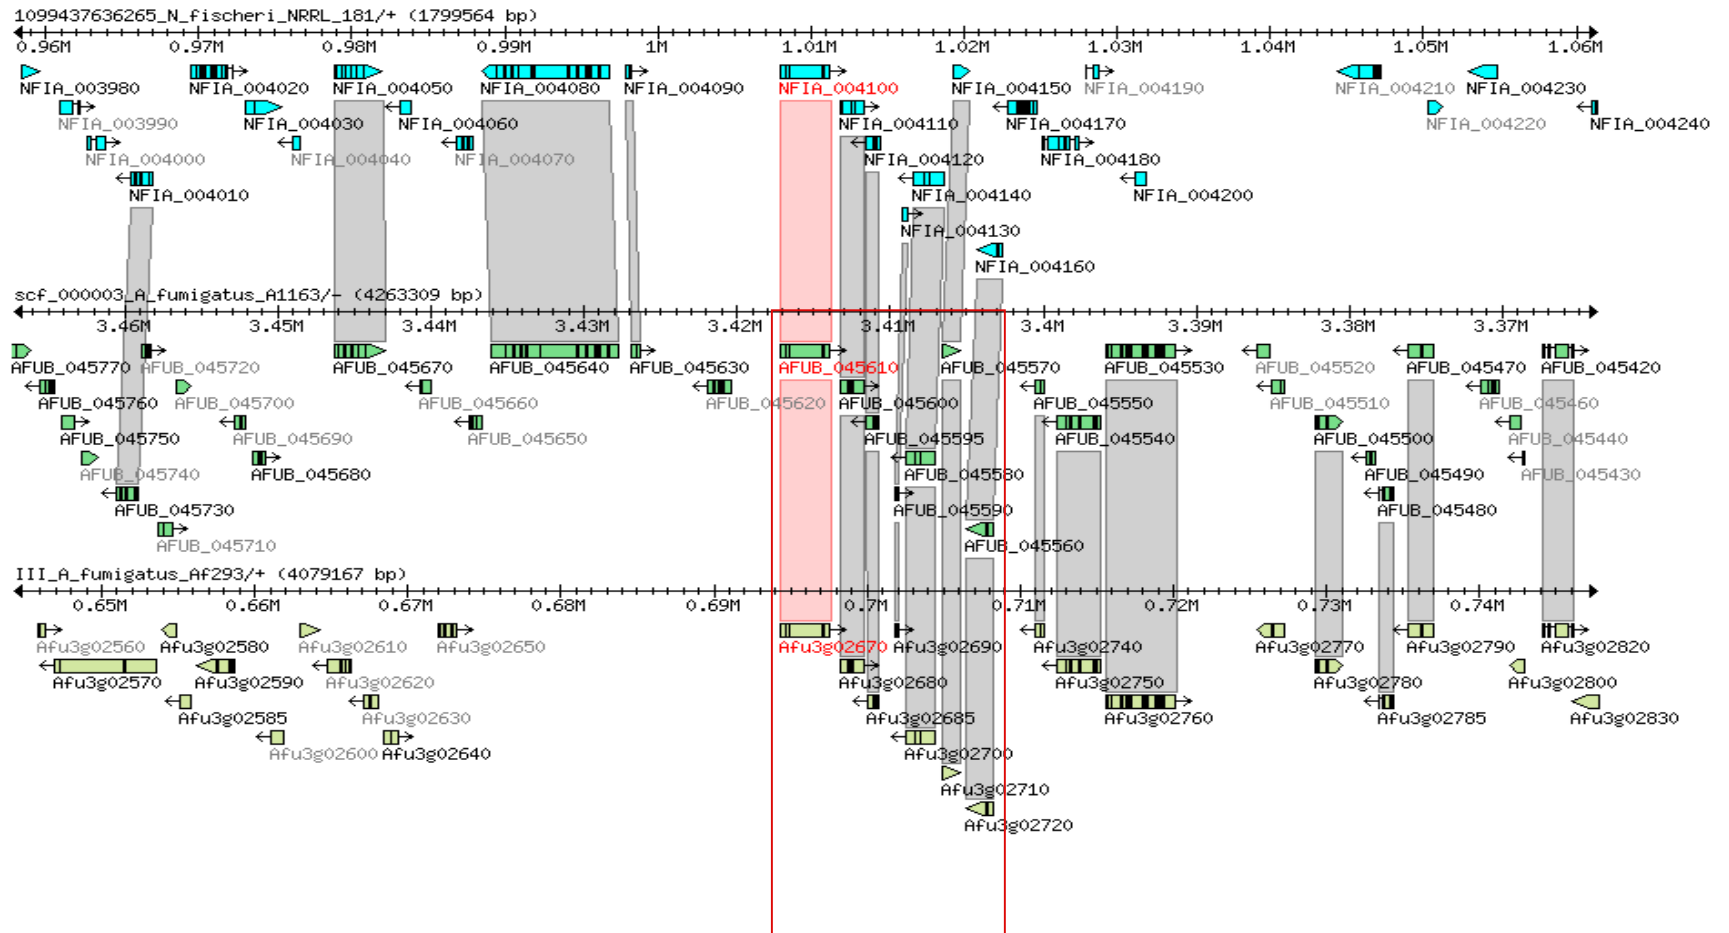

**Afu3g02670 cluster**

| Gene id (SMURF)     | Gene positions | Gene distance | Annotated_gene_function (SMURF)                                         | AspGD gene name | AspGD supplementary annotation | antiSMASH ID | Gene ID (I) | Gene ID (II) |          |
|---------------------|----------------|---------------|-------------------------------------------------------------------------|-----------------|--------------------------------|--------------|-------------|--------------|----------|
| <b>AFUA_3G02670</b> | 0              | 0             | <b>NRPS-like enzyme, putative C6 finger domain protein, putative</b>    |                 |                                | prot_ID_240  | Afu3g02670  | AFUA_3G02670 | ECS, IGD |
| AfUA_3G02680        | -1             | 575           |                                                                         |                 |                                | prot_ID_1373 | Afu3g02685  | AFUA_3G02685 |          |
| AfUA_3G02685        | -2             | 233           | <b>conserved hypothetical protein</b>                                   |                 |                                | prot_ID_241  | Afu3g02680  | AFUA_3G02680 |          |
| AfUA_3G02690        | -3             | 968           | <b>conserved hypothetical protein C6 transcription factor, putative</b> |                 |                                | prot_ID_242  | Afu3g02690  | AFUA_3G02690 |          |
| AfUA_3G02700        | -4             | 401           | <b>zinc-binding oxidoreductase, putative</b>                            |                 |                                | prot_ID_243  | Afu3g02700  | AFUA_3G02700 |          |
| AfUA_3G02710        | -5             | 385           |                                                                         |                 |                                | prot_ID_244  | Afu3g02710  | AFUA_3G02710 |          |
| AfUA_3G02720        | -6             | 345           | <b>MFS transporter, putative</b>                                        |                 |                                | prot_ID_245  | Afu3g02720  | AFUA_3G02720 | ECS, IGD |
| AfUA_3G02740        | -7             | 2728          | <b>calcium/calmodulin dependent protein kinase, putative</b>            |                 |                                | prot_ID_246  | Afu3g02740  | AFUA_3G02740 |          |
| AfUA_3G02750        | -8             | 878           | <b>C6 transcription factor, putative</b>                                |                 |                                | prot_ID_247  | Afu3g02750  | AFUA_3G02750 |          |
| AfUA_3G02760        | -9             | 368           | <b>ABC multidrug transporter, putative</b>                              |                 |                                | prot_ID_248  | Afu3g02760  | AFUA_3G02760 |          |

## Afu3g12920 cluster

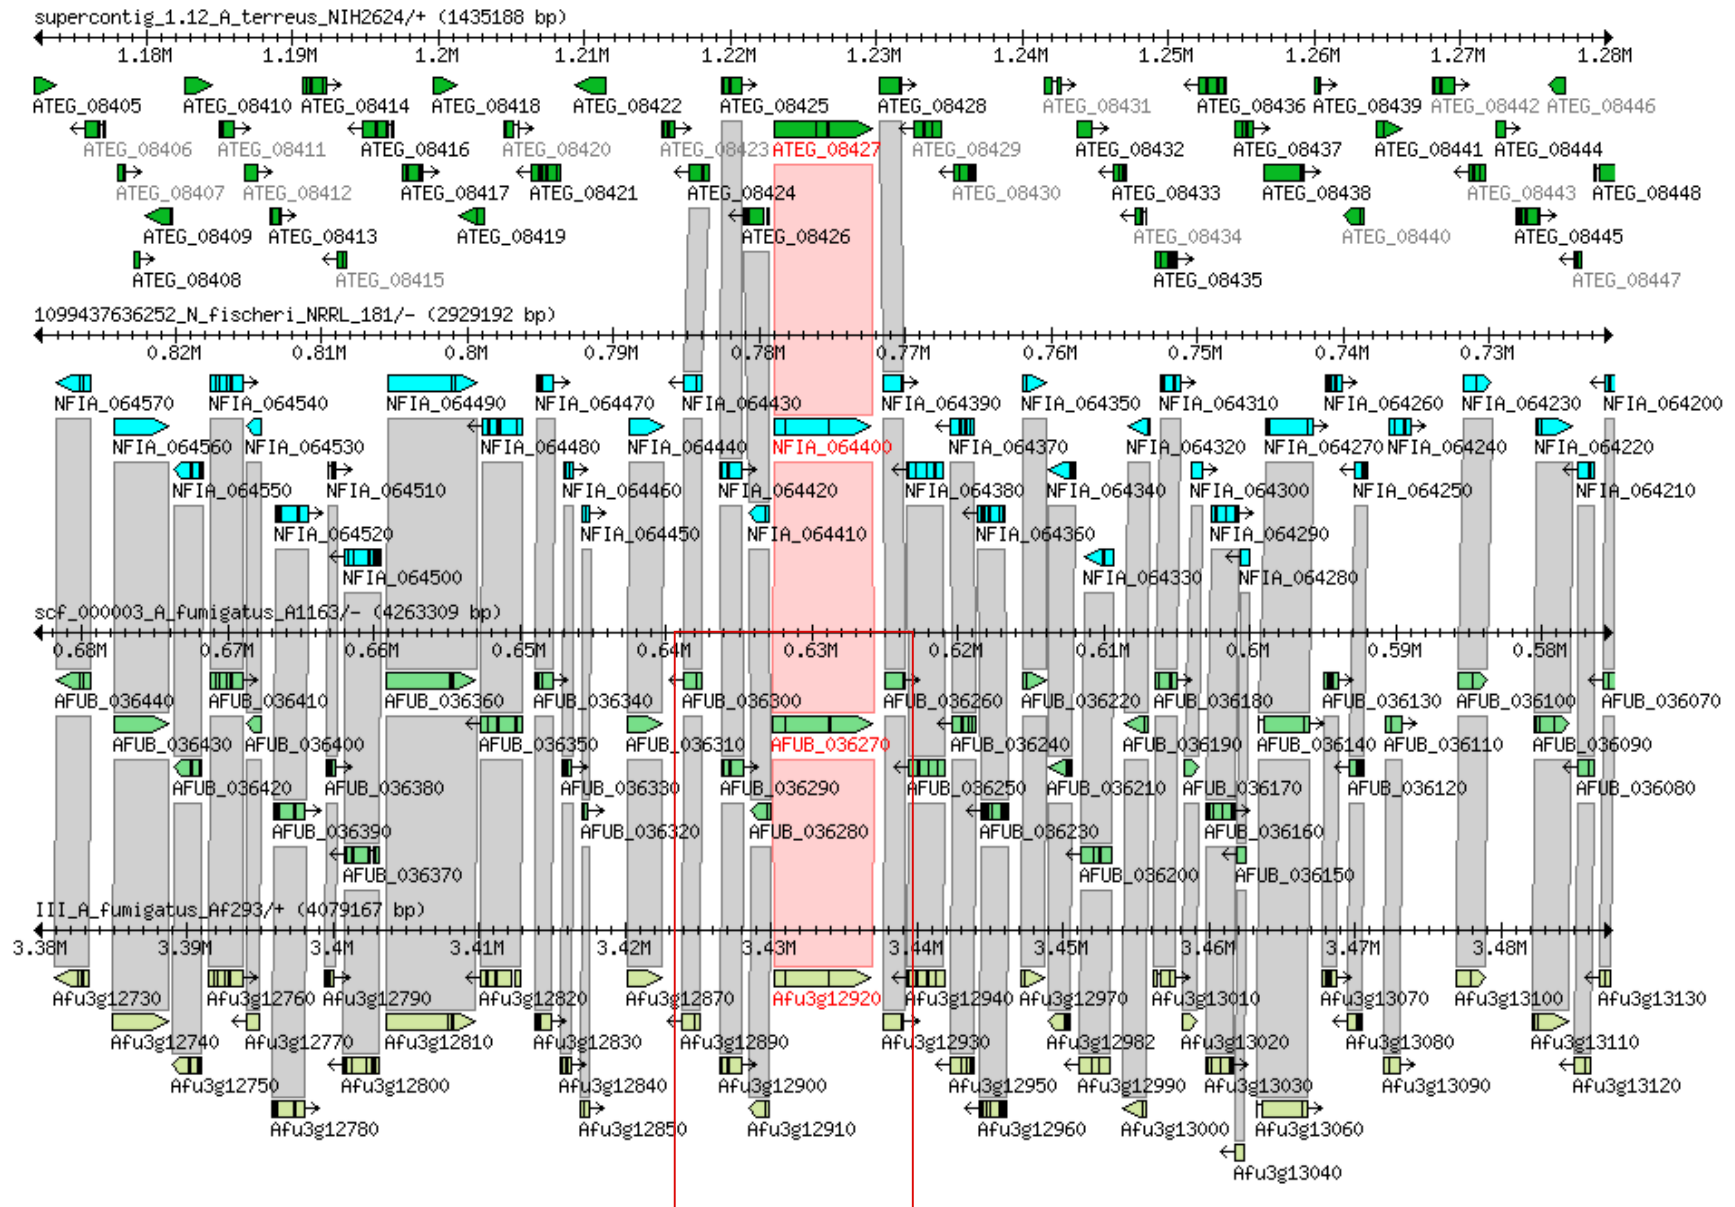

**Afu3g12920 cluster**

| Gene id (SMURF)     | Gene positions | Gene distance | Annotated_gene_function (SMURF)                                                           | AspGD gene name | AspGD supplementary annotation | antiSMASH ID        | Gene ID (I)       | Gene ID (II)        |     |
|---------------------|----------------|---------------|-------------------------------------------------------------------------------------------|-----------------|--------------------------------|---------------------|-------------------|---------------------|-----|
| n/a                 |                |               |                                                                                           |                 | Protein of unknown function    | prot_ID_1122        | Afu3g13020        | AFUA_3G13020        |     |
| n/a                 |                |               |                                                                                           |                 | Hydrolase                      | prot_ID_1121        | Afu3g13010        | AFUA_3G13010        |     |
| n/a                 |                |               |                                                                                           |                 | Transmembrane transporter      | prot_ID_1120        | Afu3g13000        | AFUA_3G13000        |     |
| n/a                 |                |               |                                                                                           |                 | Methyltransferase              | prot_ID_1119        | Afu3g12990        | AFUA_3G12990        |     |
| n/a                 |                |               |                                                                                           |                 | Protein of unknown function    | prot_ID_1359        | Afu3g12982        | AFUA_3G12982        |     |
| n/a                 |                |               |                                                                                           |                 | Protein of unknown function    | prot_ID_1118        | Afu3g12970        | AFUA_3G12970        |     |
| AFUA_3G12960        | 4              | 344           | cytochrome P450 monooxygenase Glic-like, putative                                         |                 |                                | prot_ID_1117        | Afu3g12960        | AFUA_3G12960        | ECS |
| AFUA_3G12950        | 3              | 477           | FAD binding domain protein C6 transcription factor, putative                              |                 |                                | prot_ID_1116        | Afu3g12950        | AFUA_3G12950        |     |
| AFUA_3G12940        | 2              | 223           |                                                                                           |                 |                                | prot_ID_1115        | Afu3g12940        | AFUA_3G12940        |     |
| AFUA_3G12930        | 1              | 694           | dimethylallyl tryptophan synthase SirD-like, putative                                     | 7-dmats         |                                | <b>prot_ID_1114</b> | <b>Afu3g12930</b> | <b>AFUA_3G12930</b> |     |
| <b>AFUA_3G12920</b> | 0              | 0             | nonribosomal peptide synthase GliP-like, putative O-methyltransferase GliM-like, putative | nrps5/pesF      |                                | <b>prot_ID_1113</b> | <b>Afu3g12920</b> | <b>AFUA_3G12920</b> |     |
| AFUA_3G12910        | -1             | 336           |                                                                                           |                 |                                | prot_ID_1112        | Afu3g12910        | AFUA_3G12910        |     |
| AFUA_3G12900        | -2             | 570           | MFS transporter, putative C6 transcription factor GliZ-like, putative                     |                 |                                | prot_ID_1111        | Afu3g12900        | AFUA_3G12900        |     |
| AFUA_3G12890        | -3             | 1294          |                                                                                           |                 |                                | prot_ID_1110        | Afu3g12890        | AFUA_3G12890        | ECS |
| AFUA_3G12870        | -4             | 1390          | GTPase activating protein (Gyp3), putative                                                |                 |                                | prot_ID_1109        | Afu3g12870        | AFUA_3G12870        |     |
| AFUA_3G12850        | -5             | 2601          | ubiquitin conjugating enzyme (UbcB), putative                                             |                 |                                | prot_ID_1108        | Afu3g12850        | AFUA_3G12850        |     |
| AFUA_3G12840        | -6             | 604           | Signal peptidase I                                                                        |                 |                                | prot_ID_1107        | Afu3g12840        | AFUA_3G12840        |     |
| AFUA_3G12830        | -7             | 639           | RTA1 domain protein, putative                                                             |                 |                                | prot_ID_1106        | Afu3g12830        | AFUA_3G12830        |     |
| AFUA_3G12820        | -8             | 984           | kinesin family protein                                                                    |                 |                                | prot_ID_1105        | Afu3g12820        | AFUA_3G12820        |     |
| AFUA_3G12810        | -9             | 301           | transcriptional corepressor of histone genes (Hir3), putative                             |                 |                                | n/a                 | Afu3g12810        | AFUA_3G12810        |     |
| AFUA_3G12800        | -10            | 479           | clathrin-coated vesicle protein (Bud7), putative conserved glutamic acid-rich protein     |                 |                                | n/a                 | Afu3g12800        | AFUA_3G12800        |     |
| AFUA_3G12790        | -11            | 463           | C6 transcription factor, putative                                                         |                 |                                | n/a                 | Afu3g12790        | AFUA_3G12790        |     |
| AFUA_3G12780        | -12            | 1334          |                                                                                           |                 |                                | n/a                 | Afu3g12780        | AFUA_3G12780        |     |

|              |     |     |                                                                         |     |            |              |
|--------------|-----|-----|-------------------------------------------------------------------------|-----|------------|--------------|
| AFUA_3G12770 | -13 | 870 | nucleoside-diphosphate-sugar<br>epimerase, putative                     | n/a | Afu3g12770 | AFUA_3G12770 |
| AFUA_3G12760 | -14 | 242 | conserved hypothetical protein<br>DNA repair protein Mus81,<br>putative | n/a | Afu3g12760 | AFUA_3G12760 |
| AFUA_3G12750 | -15 | 616 |                                                                         | n/a | Afu3g12750 | AFUA_3G12750 |

## Afu3g12930 cluster

Overlaps cluster above

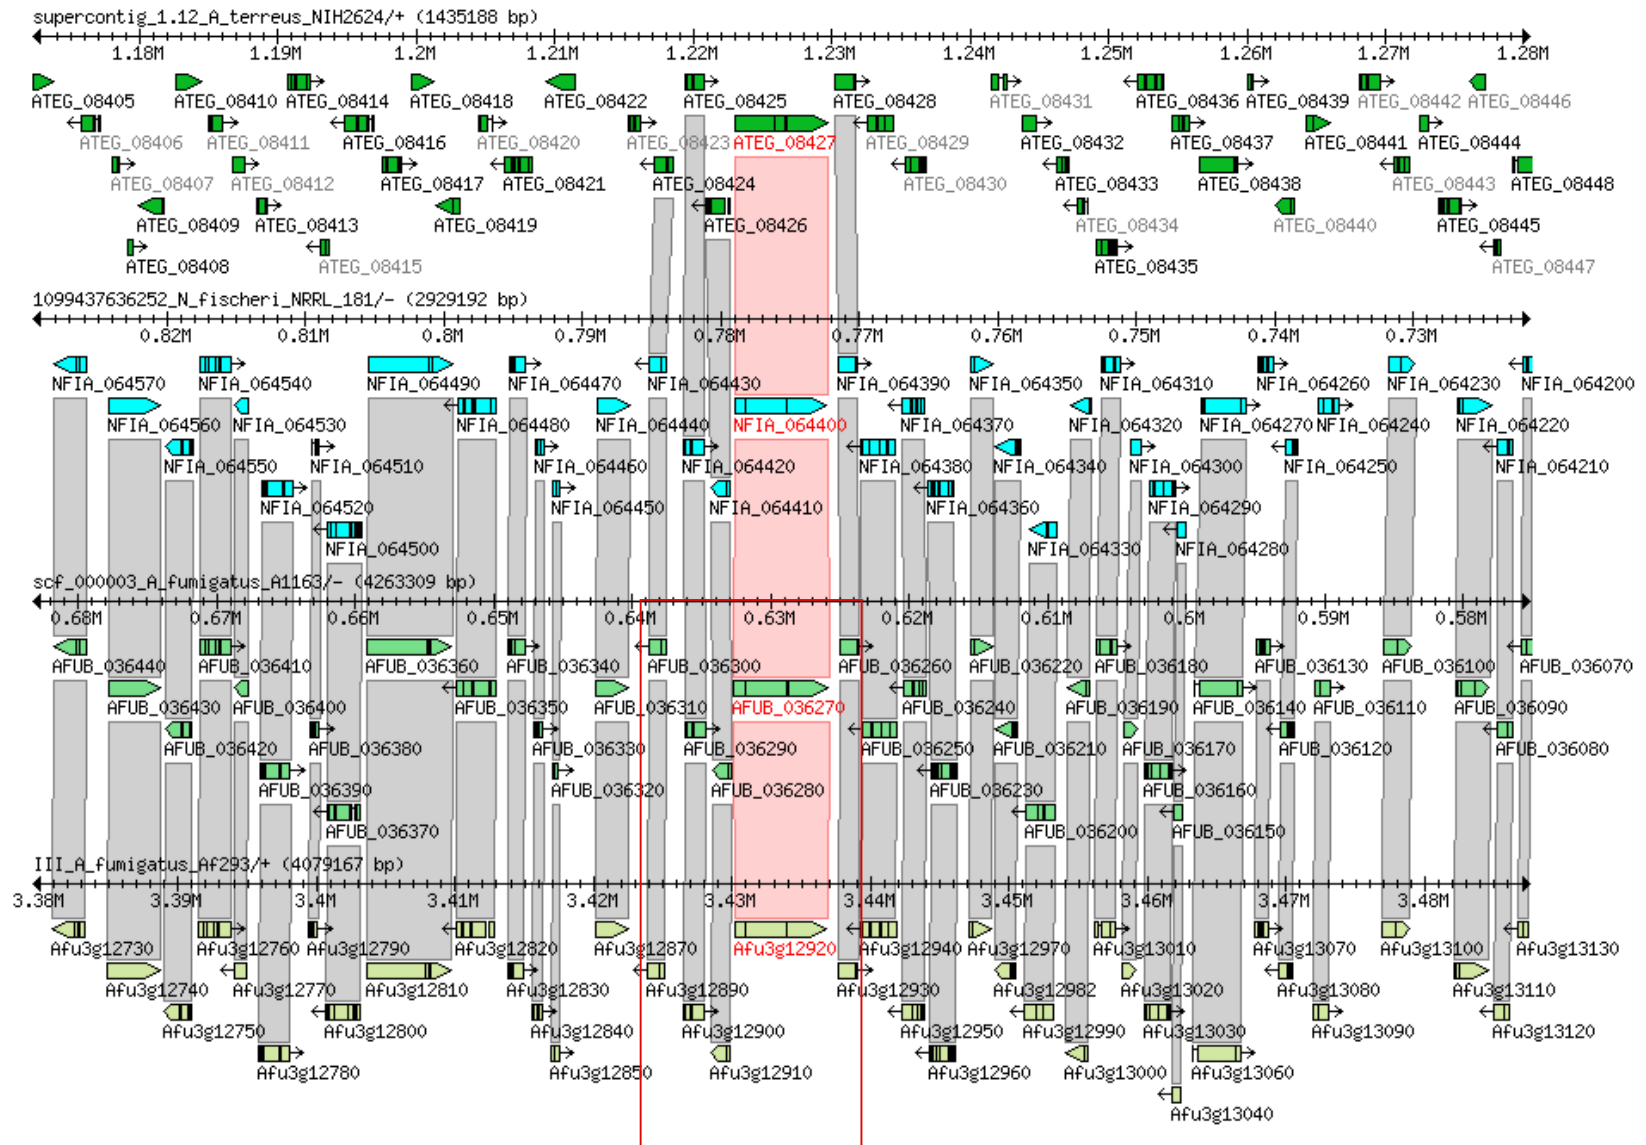

**Afu3g12930 cluster**

| Gene id (SMURF)     | Gene positions | Gene distance | Annotated_gene_function (SMURF)                               | AspGD gene name | AspGD supplementary annotation | antiSMASH ID        | Gene ID (I)       | Gene ID (II)        |     |
|---------------------|----------------|---------------|---------------------------------------------------------------|-----------------|--------------------------------|---------------------|-------------------|---------------------|-----|
| n/a                 |                |               |                                                               |                 | Protein of unknown function    | prot_ID_1122        | Afu3g13020        | AFUA_3G13020        |     |
| n/a                 |                |               |                                                               |                 | Hydrolase                      | prot_ID_1121        | Afu3g13010        | AFUA_3G13010        |     |
| AFUA_3G13000        | 7              | 900           | mitochondrial chaperone BCS1, putative                        |                 | Transmembrane transporter      | prot_ID_1120        | Afu3g13000        | AFUA_3G13000        |     |
| AFUA_3G12990        | 6              | 637           | conserved proline-rich protein                                |                 | Methyltransferase              | prot_ID_1119        | Afu3g12990        | AFUA_3G12990        |     |
| AFUA_3G12982        | 5              | 155           | extracellular serine rich protein                             |                 |                                | prot_ID_1359        | Afu3g12982        | AFUA_3G12982        |     |
| AFUA_3G12970        | 4              | 963           | DUF580 domain protein Pns1, putative                          |                 |                                | prot_ID_1118        | Afu3g12970        | AFUA_3G12970        |     |
| AFUA_3G12960        | 3              | 344           | cytochrome P450 monooxygenase GliC-like, putative             |                 |                                | prot_ID_1117        | Afu3g12960        | AFUA_3G12960        | ECS |
| AFUA_3G12950        | 2              | 477           | FAD binding domain protein                                    |                 |                                | prot_ID_1116        | Afu3g12950        | AFUA_3G12950        |     |
| AFUA_3G12940        | 1              | 223           | C6 transcription factor, putative                             |                 |                                | prot_ID_1115        | Afu3g12940        | AFUA_3G12940        |     |
| <b>AFUA_3G12930</b> | 0              | 0             | dimethylallyl tryptophan synthase SirD-like, putative         | 7-dmats         |                                | <b>prot_ID_1114</b> | <b>Afu3g12930</b> | <b>AFUA_3G12930</b> |     |
| AFUA_3G12920        | -1             | 694           | nonribosomal peptide synthase GliP-like, putative             | nrps5/pesF      |                                | <b>prot_ID_1113</b> | <b>Afu3g12920</b> | <b>AFUA_3G12920</b> |     |
| AFUA_3G12910        | -2             | 336           | O-methyltransferase GliM-like, putative                       |                 |                                | prot_ID_1112        | Afu3g12910        | AFUA_3G12910        |     |
| AFUA_3G12900        | -3             | 570           | MFS transporter, putative                                     |                 |                                | prot_ID_1111        | Afu3g12900        | AFUA_3G12900        |     |
| AFUA_3G12890        | -4             | 1294          | C6 transcription factor GliZ-like, putative                   |                 |                                | prot_ID_1110        | Afu3g12890        | AFUA_3G12890        | ECS |
| AFUA_3G12870        | -5             | 1390          | GTPase activating protein (Gyp3), putative                    |                 |                                | prot_ID_1109        | Afu3g12870        | AFUA_3G12870        |     |
| AFUA_3G12850        | -6             | 2601          | ubiquitin conjugating enzyme (UbcB), putative                 |                 |                                | prot_ID_1108        | Afu3g12850        | AFUA_3G12850        |     |
| AFUA_3G12840        | -7             | 604           | Signal peptidase I                                            |                 |                                | prot_ID_1107        | Afu3g12840        | AFUA_3G12840        |     |
| AFUA_3G12830        | -8             | 639           | RTA1 domain protein, putative                                 |                 |                                | prot_ID_1106        | Afu3g12830        | AFUA_3G12830        |     |
| AFUA_3G12820        | -9             | 984           | kinesin family protein                                        |                 |                                | prot_ID_1105        | Afu3g12820        | AFUA_3G12820        |     |
| AFUA_3G12810        | -10            | 301           | transcriptional corepressor of histone genes (Hir3), putative |                 |                                | n/a                 | Afu3g12810        | AFUA_3G12810        |     |
| AFUA_3G12800        | -11            | 479           | clathrin-coated vesicle protein (Bud7), putative              |                 |                                | n/a                 | Afu3g12800        | AFUA_3G12800        |     |
| AFUA_3G12790        | -12            | 463           | conserved glutamic acid-rich protein                          |                 |                                | n/a                 | Afu3g12790        | AFUA_3G12790        |     |
| AFUA_3G12780        | -13            | 1334          | C6 transcription factor, putative                             |                 |                                | n/a                 | Afu3g12780        | AFUA_3G12780        |     |

|              |     |     |                                                                         |     |            |              |
|--------------|-----|-----|-------------------------------------------------------------------------|-----|------------|--------------|
| AFUA_3G12770 | -14 | 870 | nucleoside-diphosphate-sugar<br>epimerase, putative                     | n/a | Afu3g12770 | AFUA_3G12770 |
| AFUA_3G12760 | -15 | 242 | conserved hypothetical protein<br>DNA repair protein Mus81,<br>putative | n/a | Afu3g12760 | AFUA_3G12760 |
| AFUA_3G12750 | -16 | 616 |                                                                         | n/a | Afu3g12750 | AFUA_3G12750 |



## Afu3g13730 cluster

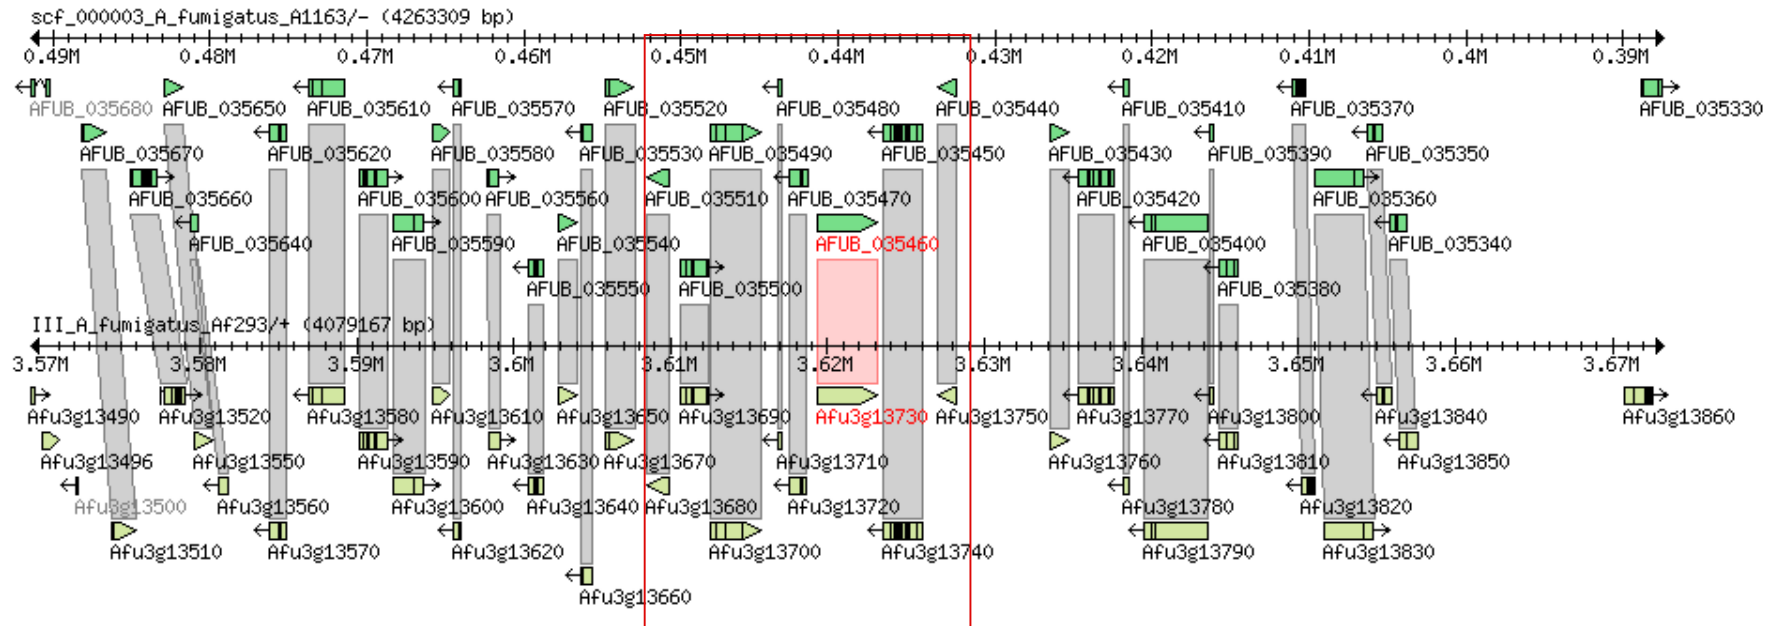

**Afu3g13730 cluster**

| Gene id (SMURF)     | Gene positions | Gene distance | Annotated_gene_function (SMURF)                                                               | AspGD gene name   | AspGD supplementary annotation     | antiSMASH ID        | Gene ID (I)       | Gene ID (II)        |
|---------------------|----------------|---------------|-----------------------------------------------------------------------------------------------|-------------------|------------------------------------|---------------------|-------------------|---------------------|
| n/a                 |                |               |                                                                                               |                   | Transmembrane transporter          | prot_ID_1195        | Afu3g13790        | AFUA_3G13790        |
| n/a                 |                |               |                                                                                               |                   | Predicted adhesin-like protein     | prot_ID_1194        | Afu3g13780        | AFUA_3G13780        |
| n/a                 |                |               |                                                                                               |                   | Vacuolar segregation protein       | prot_ID_1193        | Afu3g13770        | AFUA_3G13770        |
| n/a                 |                |               |                                                                                               |                   | Protein of unknown function        | prot_ID_1192        | Afu3g13760        | AFUA_3G13760        |
| n/a                 |                |               |                                                                                               |                   | <b>Protein of unknown function</b> | prot_ID_1191        | Afu3g13750        | AFUA_3G13750 IGD    |
| n/a                 |                |               |                                                                                               |                   | <b>Hsp70 family protein</b>        | prot_ID_1190        | Afu3g13740        | AFUA_3G13740        |
| <b>AFUA_3G13730</b> | 0              | 0             | <b>nonribosomal peptide synthase, putative</b>                                                | <b>nrps6/pesG</b> |                                    | <b>prot_ID_1189</b> | <b>Afu3g13730</b> | <b>AFUA_3G13730</b> |
| AFUA_3G13720        | -1             | 636           | <b>oxidoreductase, 2OG-Fe(II) oxygenase family, putative</b>                                  |                   |                                    | prot_ID_1188        | Afu3g13720        | AFUA_3G13720        |
| AFUA_3G13710        | -2             | 432           | <b>GTP cyclohydrolase I, putative</b>                                                         |                   |                                    | prot_ID_1187        | Afu3g13710        | AFUA_3G13710        |
| AFUA_3G13700        | -3             | 1066          | <b>transferase family protein pyoverdine/dityrosine biosynthesis family protein, putative</b> |                   |                                    | prot_ID_1186        | Afu3g13700        | AFUA_3G13700        |
| AFUA_3G13690        | -4             | 197           |                                                                                               |                   |                                    | prot_ID_1185        | Afu3g13690        | AFUA_3G13690        |
| AFUA_3G13680        | -5             | 747           | <b>conserved hypothetical protein siderochrome-iron transporter, putative</b>                 |                   |                                    | prot_ID_1184        | Afu3g13680        | AFUA_3G13680        |
| AFUA_3G13670        | -6             | 791           | <b>Ctr copper transporter family protein</b>                                                  |                   |                                    | prot_ID_1183        | Afu3g13670        | AFUA_3G13670 FA     |
| AFUA_3G13660        | -7             | 938           |                                                                                               |                   |                                    | prot_ID_1182        | Afu3g13660        | AFUA_3G13660        |
| AFUA_3G13650        | -8             | 230           | <b>integral membrane protein extracellular serine-rich protein, putative</b>                  |                   |                                    | prot_ID_1181        | Afu3g13650        | AFUA_3G13650        |
| AFUA_3G13640        | -9             | 967           |                                                                                               |                   |                                    | prot_ID_1180        | Afu3g13640        | AFUA_3G13640        |
| AFUA_3G13630        | -10            | 1856          | <b>conserved hypothetical protein</b>                                                         |                   |                                    | prot_ID_1179        | Afu3g13630        | AFUA_3G13630        |
| AFUA_3G13620        | -11            | 1892          | <b>cupin domain protein oxidoreductase, zinc-binding, putative</b>                            |                   |                                    | prot_ID_1178        | Afu3g13620        | AFUA_3G13620        |
| AFUA_3G13610        | -12            | 203           | <b>C6 transcription factor, putative</b>                                                      |                   |                                    | prot_ID_1177        | Afu3g13610        | AFUA_3G13610        |
| AFUA_3G13600        | -13            | 488           |                                                                                               |                   |                                    | prot_ID_1176        | Afu3g13600        | AFUA_3G13600        |

# Afu3g14700 cluster

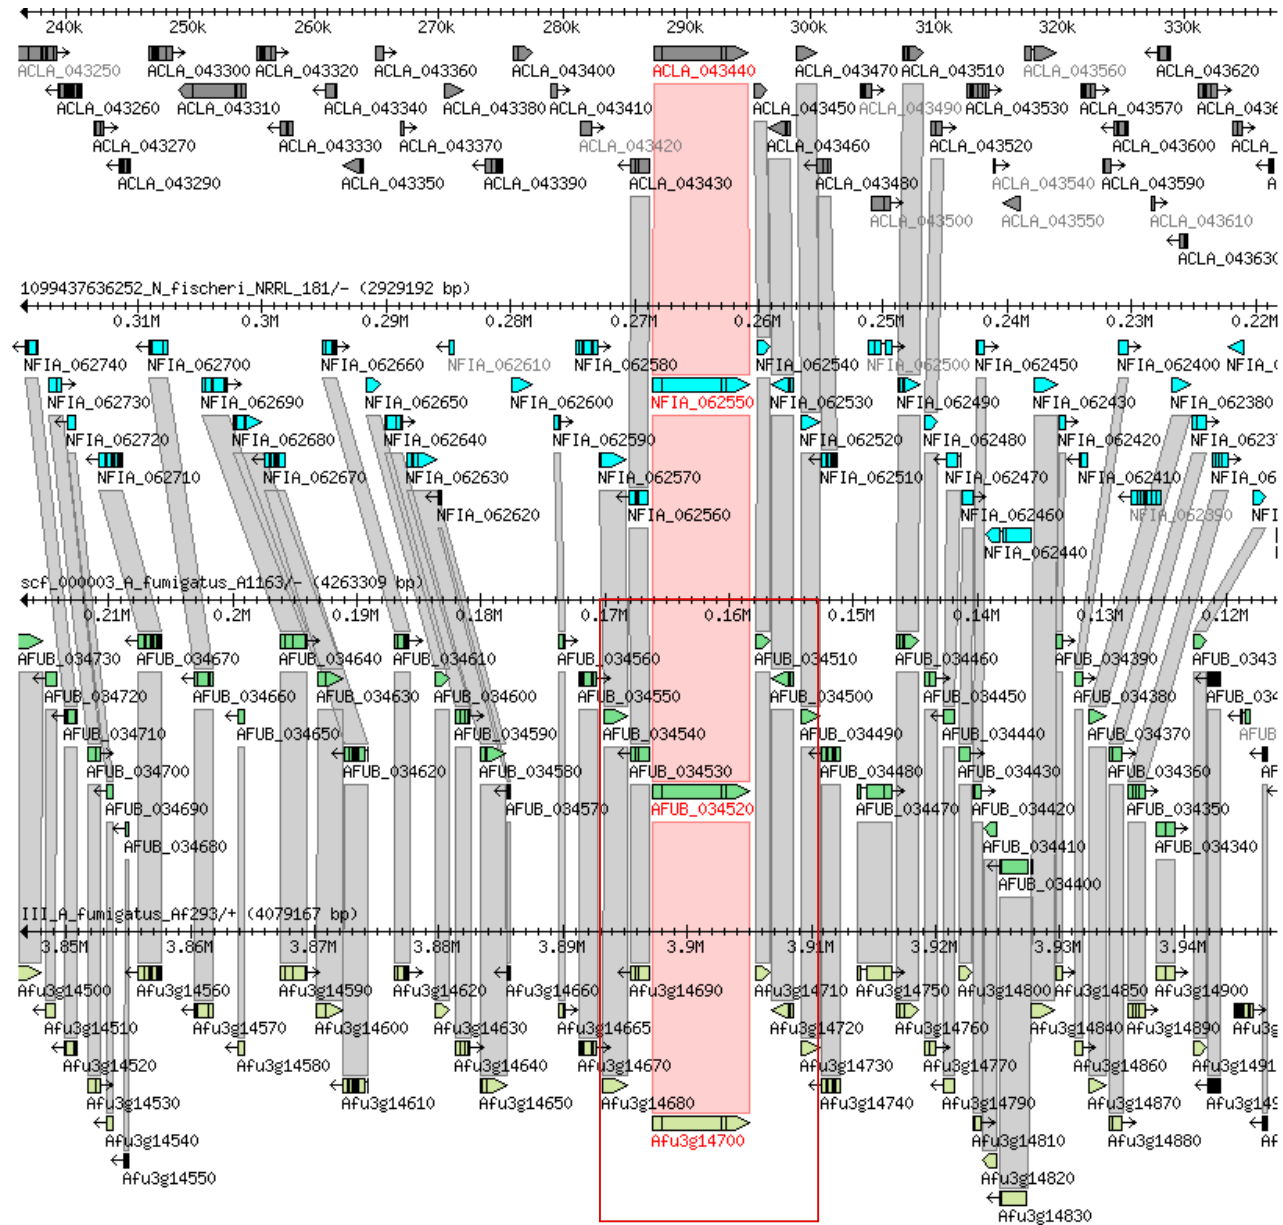

**Afu3g14700 cluster**

| Gene id (SMURF)     | Gene positions | Gene distance | Annotated_gene_function (SMURF)                       | AspGD gene name | AspGD supplementary annotation | antiSMASH ID        | Gene ID (I)       | Gene ID (II)        |
|---------------------|----------------|---------------|-------------------------------------------------------|-----------------|--------------------------------|---------------------|-------------------|---------------------|
| AFUA_3G14880        | 17             | 170           | oxidoreductase, 2OG-Fe(II) oxygenase family, putative |                 |                                |                     |                   |                     |
| AFUA_3G14870        | 16             | 456           | conserved hypothetical protein                        |                 |                                |                     |                   |                     |
| AFUA_3G14860        | 15             | 1033          | conserved hypothetical protein                        |                 |                                |                     |                   |                     |
| AFUA_3G14850        | 14             | 139           | 3-dehydroquinate dehydratase, type II                 |                 |                                |                     |                   |                     |
| AFUA_3G14840        | 13             | 204           | C6 transcription factor, putative                     |                 |                                |                     |                   |                     |
| AFUA_3G14830        | 12             | 269           | pentafunctional AROM polypeptide, putative            |                 |                                |                     |                   |                     |
| AFUA_3G14820        | 11             | 46            | 4-hydroxyphenylpyruvate dioxygenase, putative         |                 |                                | prot_ID_1293        | Afu3g14820        | AFUA_3G14820        |
| AFUA_3G14810        | 10             | 202           | pathogenesis associated protein Pep2, putative        |                 |                                | prot_ID_1292        | Afu3g14810        | AFUA_3G14810        |
| AFUA_3G14800        | 9              | 427           | shikimate 5-dehydrogenase, putative                   |                 |                                | prot_ID_1291        | Afu3g14800        | AFUA_3G14800        |
| AFUA_3G14790        | 8              | 455           | pentafunctional AROM polypeptide, putative            |                 |                                | prot_ID_1290        | Afu3g14790        | AFUA_3G14790        |
| AFUA_3G14770        | 7              | 464           | reductase, putative                                   |                 |                                | prot_ID_1289        | Afu3g14770        | AFUA_3G14770        |
| AFUA_3G14760        | 6              | 401           | cytochrome P450 monooxygenase (Fum15), putative       |                 |                                | prot_ID_1288        | Afu3g14760        | AFUA_3G14760        |
| AFUA_3G14750        | 5              | 1366          | fungus specific transcription factor, putative        |                 |                                | prot_ID_1287        | Afu3g14750        | AFUA_3G14750        |
| AFUA_3G14740        | 4              | 121           | conserved hypothetical protein                        |                 |                                | prot_ID_1286        | Afu3g14740        | AFUA_3G14740        |
| AFUA_3G14730        | 3              | 605           | <b>LysR family regulatory protein, putative</b>       |                 |                                | prot_ID_1285        | Afu3g14730        | AFUA_3G14730 ECS    |
| AFUA_3G14720        | 2              | 75            | <b>MFS transporter, putative</b>                      |                 |                                | prot_ID_1284        | Afu3g14720        | AFUA_3G14720        |
| AFUA_3G14710        | 1              | 577           | <b>phytanoyl-CoA dioxygenase family protein</b>       |                 |                                | prot_ID_1283        | Afu3g14710        | AFUA_3G14710        |
| <b>AFUA_3G14700</b> | 0              | 0             | <b>polyketide synthase, putative</b>                  |                 |                                | <b>prot_ID_1282</b> | <b>Afu3g14700</b> | <b>AFUA_3G14700</b> |
| AFUA_3G14690        | -1             | 320           | <b>aminotransferase, putative</b>                     |                 |                                | prot_ID_1281        | Afu3g14690        | AFUA_3G14690 FA     |
| n/a                 |                |               |                                                       | plb3            | Secreted lysophospholipase B   | prot_ID_1280        | Afu3g14680        | AFUA_3G14680        |
| n/a                 |                |               |                                                       |                 | Transmembrane transporter      | prot_ID_1279        | Afu3g14670        | AFUA_3G14670        |
| n/a                 |                |               |                                                       |                 | Protein of unknown function    | prot_ID_1278        | Afu3g14665        | AFUA_3G14665        |
| n/a                 |                |               |                                                       |                 | Protein of unknown function    | prot_ID_1277        | Afu3g14660        | AFUA_3G14660        |
| n/a                 |                |               |                                                       |                 | Protein of unknown function    | prot_ID_1276        | Afu3g14650        | AFUA_3G14650        |

|     |      |                                                                             |              |            |              |
|-----|------|-----------------------------------------------------------------------------|--------------|------------|--------------|
| n/a | ssu2 | C4-dicarboxylate transporter/malic acidtransport protein                    | prot_ID_1275 | Afu3g14640 | AFUA_3G14640 |
| n/a |      | Oxidoreductase Predicted adhesin-like protein; ortholog of A. nidulans abnA | prot_ID_1274 | Afu3g14630 | AFUA_3G14630 |
| n/a |      |                                                                             | prot_ID_1273 | Afu3g14620 | AFUA_3G14620 |

## Afu3g15270 cluster

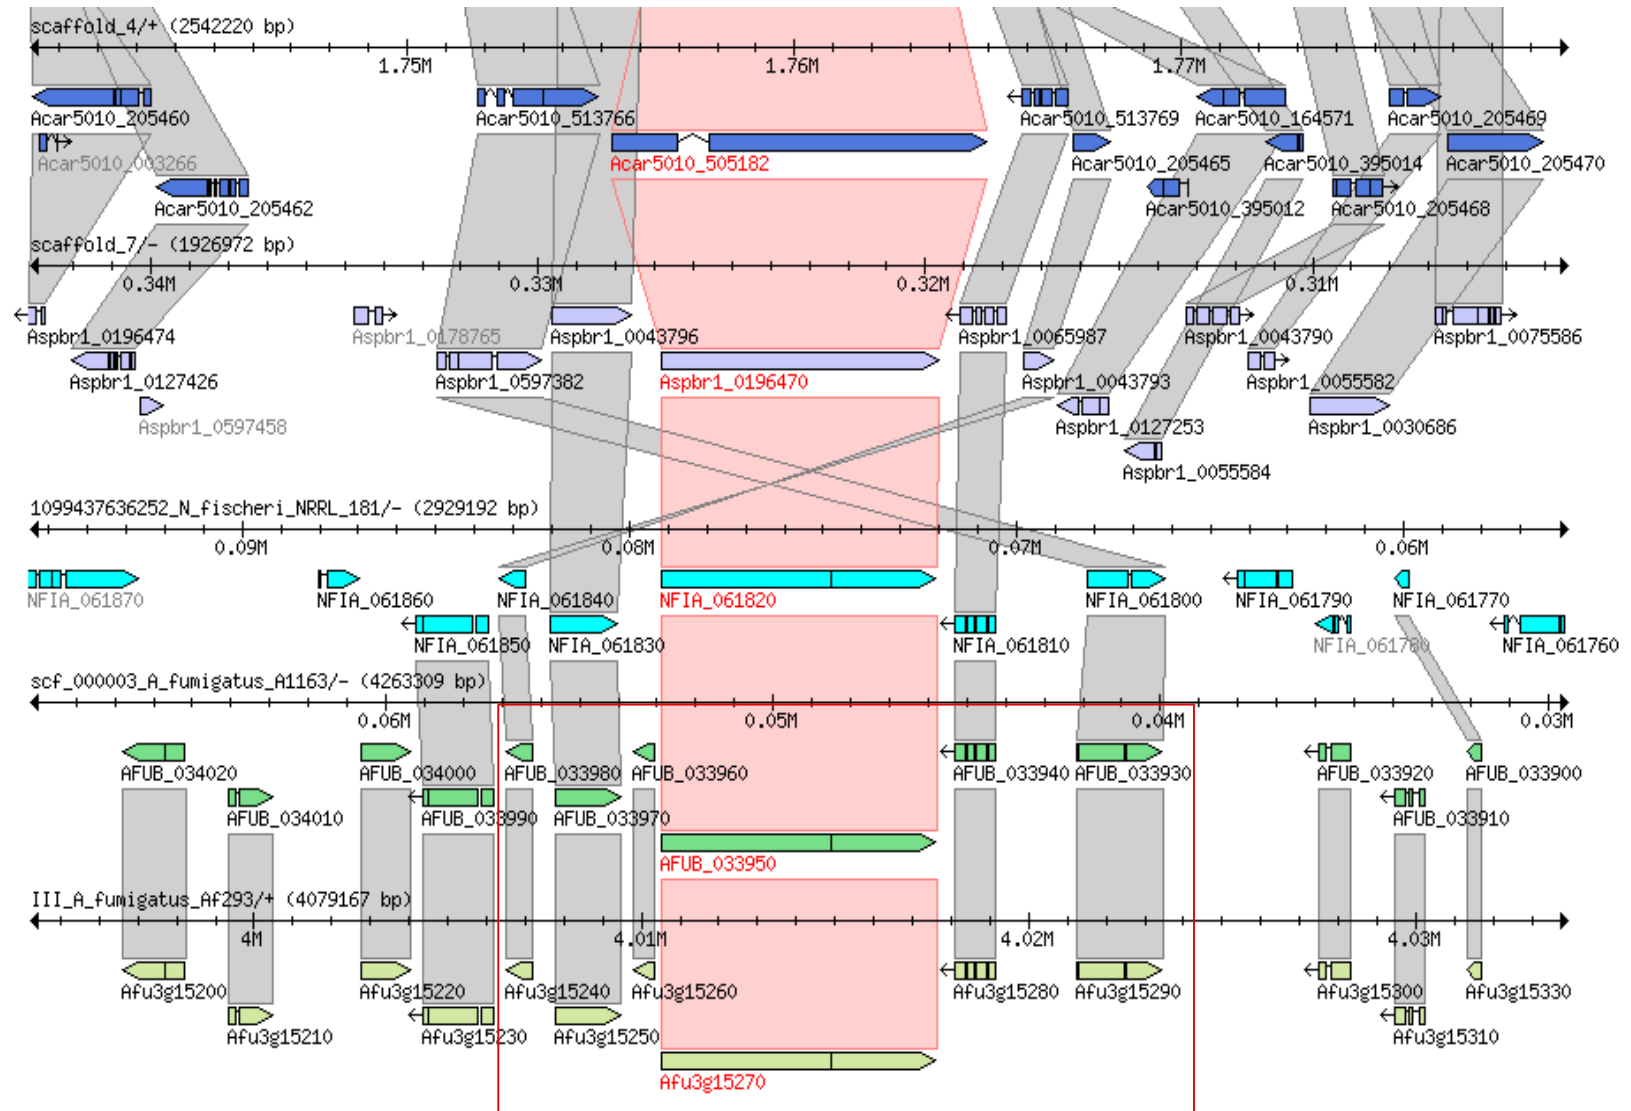

**Afu3g15270 cluster**

| Gene id (SMURF)     | Gene positions | Gene distance | Annotated_gene_function (SMURF)                                     | AspGD gene name   | AspGD supplementary annotation | antiSMASH ID        | Gene ID (I)       | Gene ID (II)        |          |
|---------------------|----------------|---------------|---------------------------------------------------------------------|-------------------|--------------------------------|---------------------|-------------------|---------------------|----------|
| n/a                 |                |               |                                                                     |                   | Oxidoreductase                 | prot_ID_1342        | Afu3g15350        | AFUA_3G15350        |          |
| n/a                 |                |               |                                                                     |                   | Putative transcription factor  | prot_ID_1341        | Afu3g15340        | AFUA_3G15340        |          |
| n/a                 |                |               |                                                                     |                   | Protein of unknown function    | prot_ID_1340        | Afu3g15330        | AFUA_3G15330        |          |
| n/a                 |                |               |                                                                     |                   | C-methyl transferase           | prot_ID_1339        | Afu3g15310        | AFUA_3G15310        |          |
| n/a                 |                |               |                                                                     |                   | Transmembrane transporter      | prot_ID_1338        | Afu3g15300        | AFUA_3G15300        |          |
| AFUA_3G15290        | 2              | 2090          | C6 transcription factor, putative                                   |                   |                                | prot_ID_1337        | Afu3g15290        | AFUA_3G15290        | ECS, IGD |
| AFUA_3G15280        | 1              | 453           | methyltransferase, putative nonribosomal peptide synthase, putative |                   |                                | prot_ID_1336        | Afu3g15280        | AFUA_3G15280        |          |
| <b>AFUA_3G15270</b> | 0              | 0             |                                                                     | <b>nrps7/pesH</b> |                                | <b>prot_ID_1335</b> | <b>Afu3g15270</b> | <b>AFUA_3G15270</b> |          |
| AFUA_3G15260        | -1             | 202           | hypothetical protein MFS drug efflux transporter, putative          |                   |                                | prot_ID_1334        | Afu3g15260        | AFUA_3G15260        |          |
| AFUA_3G15250        | -2             | 321           |                                                                     |                   |                                | prot_ID_1333        | Afu3g15250        | AFUA_3G15250        |          |
| n/a                 |                |               |                                                                     |                   | Carbon-nitrogen ligase         | prot_ID_1332        | Afu3g15240        | AFUA_3G15240        | ECS      |
| n/a                 |                |               |                                                                     |                   | Protein of unknown function    | prot_ID_1331        | Afu3g15230        | AFUA_3G15230        |          |
| n/a                 |                |               |                                                                     |                   |                                | prot_ID_1330        | Afu3g15220        | AFUA_3G15220        |          |
| n/a                 |                |               |                                                                     |                   |                                | prot_ID_1329        | Afu3g15210        | AFUA_3G15210        |          |
| n/a                 |                |               |                                                                     |                   |                                | prot_ID_1328        | Afu3g15200        | AFUA_3G15200        |          |
| n/a                 |                |               |                                                                     |                   |                                | prot_ID_1327        | Afu3g15190        | AFUA_3G15190        |          |

# Afu4g00210 cluster

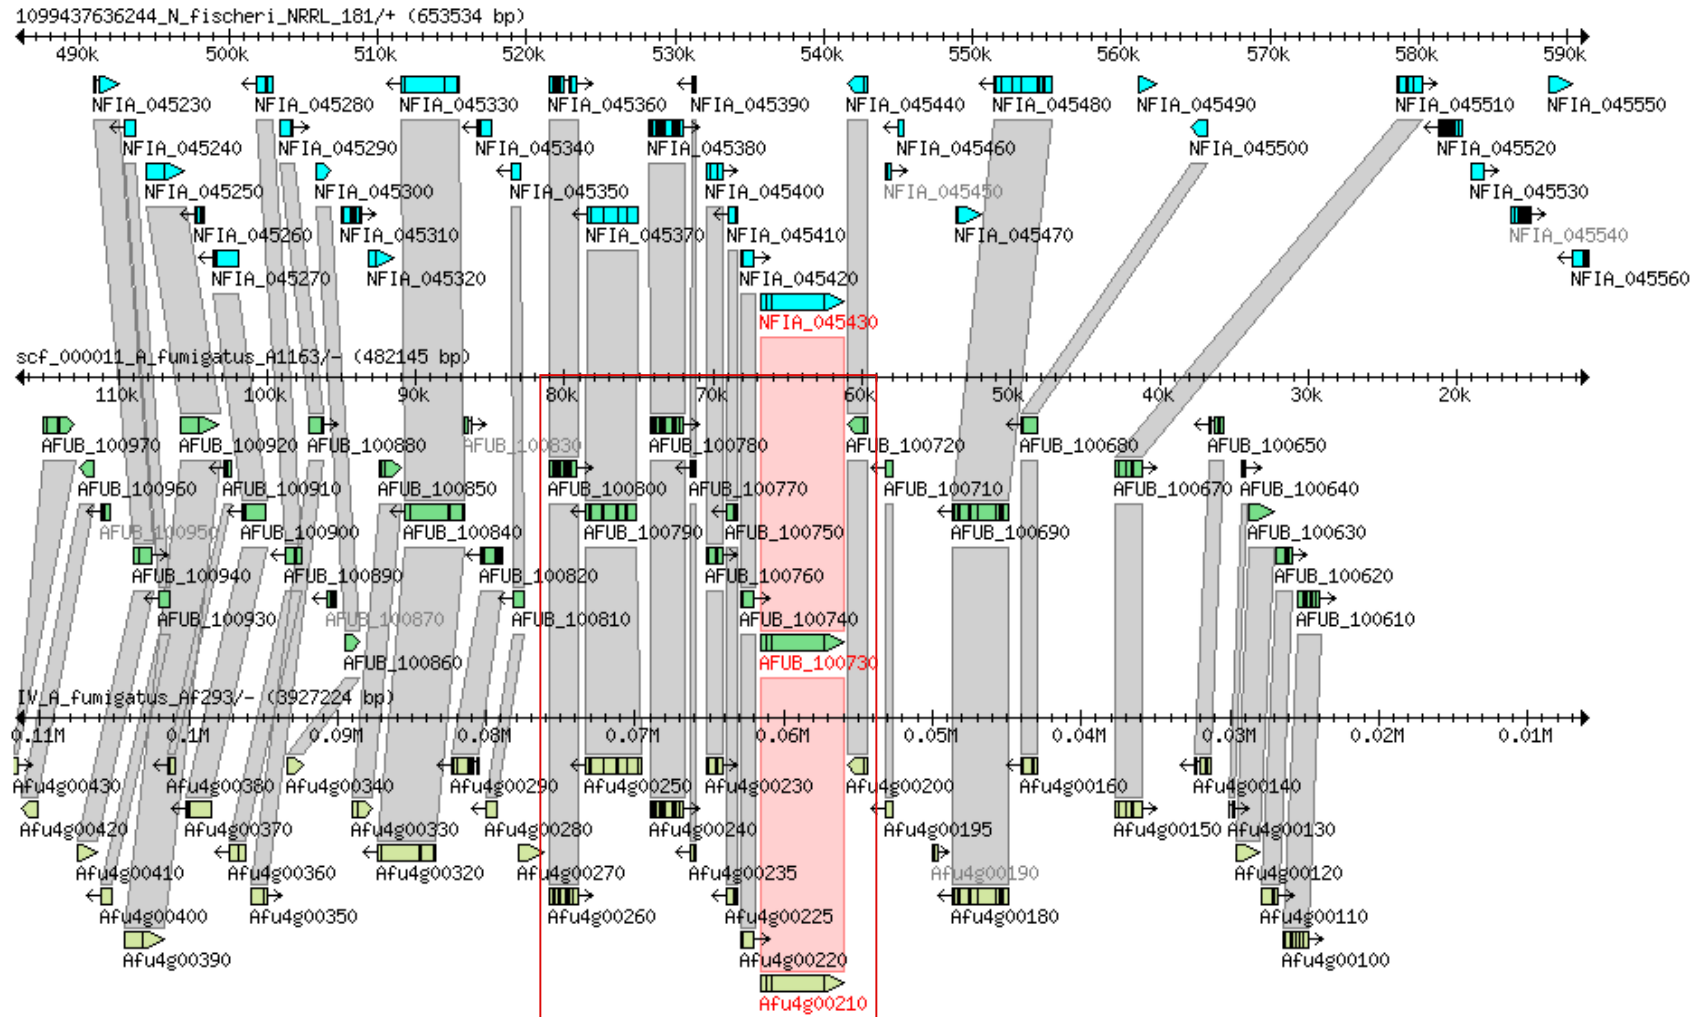



**Afu4g00210 cluster**

| Gene id (SMURF)     | Gene positions | Gene distance | Annotated_gene_function (SMURF)                              | AspGD gene name | AspGD supplementary annotation       | antiSMASH ID      | Gene ID (I)       | Gene ID (II)        |     |
|---------------------|----------------|---------------|--------------------------------------------------------------|-----------------|--------------------------------------|-------------------|-------------------|---------------------|-----|
| n/a                 |                |               |                                                              |                 | Succinyl-CoA synthetase beta subunit | prot_ID_19        | Afu4g00290        | AFUA_4G00290        |     |
| n/a                 |                |               |                                                              |                 | Protein of unknown function          | prot_ID_18        | Afu4g00280        | AFUA_4G00280        |     |
| n/a                 |                |               |                                                              |                 | Protein of unknown function          | prot_ID_17        | Afu4g00270        | AFUA_4G00270        |     |
| AFUA_4G00260        | 7              | 555           | MFS transporter, putative                                    |                 |                                      | prot_ID_16        | Afu4g00260        | AFUA_4G00260        | IGD |
| AFUA_4G00250        | 6              | 625           | WD40 repeat protein amino acid transporter, putative         |                 |                                      | prot_ID_15        | Afu4g00250        | AFUA_4G00250        |     |
| AFUA_4G00240        | 5              | 445           |                                                              |                 |                                      | prot_ID_14        | Afu4g00240        | AFUA_4G00240        |     |
| AFUA_4G00235        | 4              | 675           | conserved hypothetical protein                               |                 |                                      | prot_ID_1223      | Afu4g00235        | AFUA_4G00235        |     |
| AFUA_4G00230        | 3              | 306           | oxidoreductase, 2OG-Fe(II) oxygenase family, putative        |                 |                                      | prot_ID_13        | Afu4g00230        | AFUA_4G00230        |     |
| AFUA_4G00225        | 2              | 313           | DUF1772 domain protein metallo-beta-lactamase domain protein |                 |                                      | prot_ID_1242      | Afu4g00225        | AFUA_4G00225        |     |
| AFUA_4G00220        | 1              | 365           |                                                              |                 |                                      | prot_ID_12        | Afu4g00220        | AFUA_4G00220        |     |
| <b>AFUA_4G00210</b> | 0              | 0             | polyketide synthase, putative                                |                 |                                      | <b>prot_ID_11</b> | <b>Afu4g00210</b> | <b>AFUA_4G00210</b> |     |
| n/a                 |                |               |                                                              |                 | F-box domain protein                 | prot_ID_10        | Afu4g00200        | AFUA_4G00200        | ECS |
| n/a                 |                |               |                                                              |                 | Protein of unknown function          | prot_ID_1198      | Afu4g00195        | AFUA_4G00195        |     |
| n/a                 |                |               |                                                              |                 | Protein of unknown function          | prot_ID_9         | Afu4g00190        | AFUA_4G00190        |     |
| n/a                 |                |               |                                                              |                 | Fatty acid 8,11-diol synthase        | prot_ID_8         | Afu4g00180        | AFUA_4G00180        |     |
| n/a                 |                |               |                                                              |                 | Oxidoreductase                       | prot_ID_7         | Afu4g00160        | AFUA_4G00160        |     |
| n/a                 |                |               |                                                              |                 | MFS maltose transporter              | prot_ID_6         | Afu4g00150        | AFUA_4G00150        |     |

# Afu4g14560 cluster

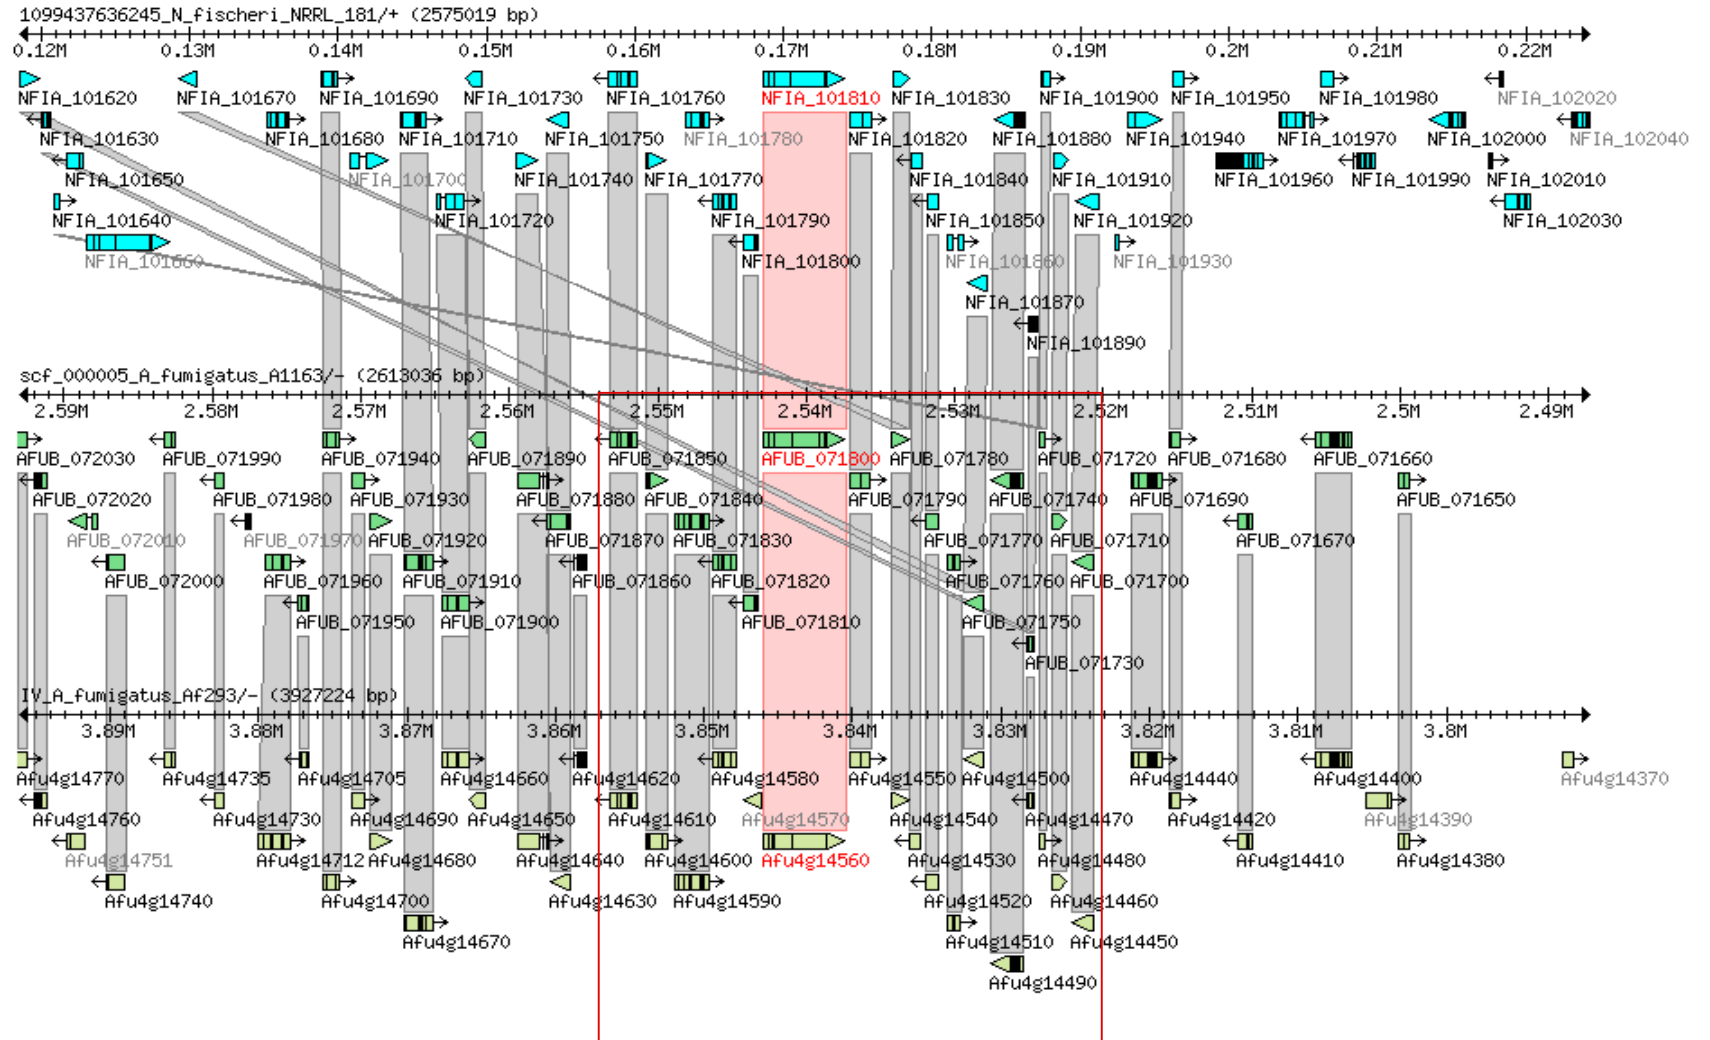

**Afu4g14560 cluster**

| Gene id (SMURF)     | Gene positions | Gene distance | Annotated_gene_function (SMURF)                       | AspGD gene name | AspGD supplementary annotation | antiSMASH ID        | Gene ID (I)       | Gene ID (II)        |
|---------------------|----------------|---------------|-------------------------------------------------------|-----------------|--------------------------------|---------------------|-------------------|---------------------|
| AfUA_4G14730        | 17             | 2314          | GNAT family acetyltransferase, putative               |                 |                                | n/a                 | Afu4g14730        | AFUA_4G14730        |
| AfUA_4G14712        | 16             | 514           | C6 transcription factor, putative                     |                 |                                | n/a                 | Afu4g14712        | AFUA_4G14712        |
| AfUA_4G14705        | 15             | 968           | hypothetical protein                                  |                 |                                | n/a                 | Afu4g14705        | AFUA_4G14705        |
| AfUA_4G14700        | 14             | 732           | GDSL Lipase/Acylhydrolase family protein              |                 |                                | n/a                 | Afu4g14700        | AFUA_4G14700        |
| AfUA_4G14690        | 13             | 352           | hypothetical protein                                  |                 |                                | n/a                 | Afu4g14690        | AFUA_4G14690        |
| AfUA_4G14680        | 12             | 828           | C6 transcription factor, putative                     |                 |                                | n/a                 | Afu4g14680        | AFUA_4G14680        |
| AfUA_4G14670        | 11             | 588           | MFS quinate transporter, putative                     |                 |                                | n/a                 | Afu4g14670        | AFUA_4G14670        |
| AfUA_4G14660        | 10             | 31            | conserved hypothetical protein                        |                 |                                | prot_ID_1174        | Afu4g14660        | AFUA_4G14660        |
| AfUA_4G14650        | 9              | 2222          | ribokinase                                            |                 |                                | prot_ID_1173        | Afu4g14650        | AFUA_4G14650        |
| AfUA_4G14640        | 8              | 66            | low affinity iron transporter, putative               |                 |                                | prot_ID_1172        | Afu4g14640        | AFUA_4G14640        |
| AfUA_4G14630        | 7              | 189           | FAD binding oxidoreductase, putative                  |                 |                                | prot_ID_1171        | Afu4g14630        | AFUA_4G14630        |
| AfUA_4G14620        | 6              | 1527          | RING finger protein                                   |                 |                                | prot_ID_1170        | Afu4g14620        | AFUA_4G14620        |
| AfUA_4G14610        | 5              | 625           | MFS sugar transporter, putative                       |                 |                                | prot_ID_1169        | Afu4g14610        | AFUA_4G14610        |
| AfUA_4G14600        | 4              | 541           | UPF0075 domain protein                                |                 |                                | prot_ID_1168        | Afu4g14600        | AFUA_4G14600        |
| AfUA_4G14590        | 3              | 242           | C6 transcription factor, putative                     |                 |                                | prot_ID_1167        | Afu4g14590        | AFUA_4G14590        |
| AfUA_4G14580        | 2              | 401           | O-methyltransferase, putative                         |                 |                                | prot_ID_1166        | Afu4g14580        | AFUA_4G14580        |
| AfUA_4G14570        | 1              | 139           | metallo-beta-lactamase domain protein, putative       |                 |                                | prot_ID_1165        | Afu4g1457         | AFUA_4G14570        |
| <b>AfUA_4G14560</b> | 0              | 0             | polyketide synthase, putative                         |                 |                                | <b>prot_ID_1164</b> | <b>Afu4g14560</b> | <b>AFUA_4G14560</b> |
| AfUA_4G14550        | -1             | 306           | O-methyltransferase family protein                    |                 |                                | prot_ID_1163        | Afu4g14550        | AFUA_4G14550        |
| AfUA_4G14540        | -2             | 1372          | C6 transcription factor (AfIR), putative              |                 |                                | prot_ID_1162        | Afu4g14540        | AFUA_4G14540        |
| AfUA_4G14530        | -3             | 90            | glutathione S-transferase                             |                 |                                |                     |                   |                     |
|                     |                |               | Ure2-like, putative                                   |                 |                                | prot_ID_1161        | Afu4g14530        | AFUA_4G14530        |
|                     |                |               | NAD-dependent                                         |                 |                                |                     |                   |                     |
|                     |                |               | epimerase/dehydratase, putative                       |                 |                                | prot_ID_1160        | Afu4g14520        | AFUA_4G14520        |
| AfUA_4G14520        | -4             | 418           | putative                                              |                 |                                | prot_ID_1159        | Afu4g14510        | AFUA_4G14510        |
| AfUA_4G14510        | -5             | 587           | hypothetical protein                                  |                 |                                | prot_ID_1158        | Afu4g14500        | AFUA_4G14500        |
| AfUA_4G14500        | -6             | 161           | conserved hypothetical protein                        |                 |                                | prot_ID_1157        | Afu4g14490        | AFUA_4G14490        |
| AfUA_4G14490        | -7             | 490           | extracellular dihydrogeodin oxidase/laccase, putative |                 |                                |                     |                   |                     |

|              |     |      |                                                                        |                                |              |            |              |               |
|--------------|-----|------|------------------------------------------------------------------------|--------------------------------|--------------|------------|--------------|---------------|
| AFUA_4G14470 | -8  | 243  | hypothetical protein                                                   |                                | prot_ID_1155 | Afu4g14470 | AFUA_4G14470 |               |
| AFUA_4G14480 | -9  | 275  | conserved hypothetical protein                                         |                                | prot_ID_1156 | Afu4g14480 | AFUA_4G14480 |               |
| AFUA_4G14460 | -10 | 354  | conserved hypothetical protein<br>mannitol dehydrogenase,<br>putative  |                                | prot_ID_1154 | Afu4g14460 | AFUA_4G14460 |               |
| AFUA_4G14450 | -11 | 399  |                                                                        |                                | prot_ID_1153 | Afu4g14450 | AFUA_4G14450 | ECS           |
| AFUA_4G14440 | -12 | 2440 | NRPS-like enzyme, putative<br>secreted glycosyl hydrolase,<br>putative | Secreted glycosyl<br>hydrolase | prot_ID_1152 | Afu4g14440 | AFUA_4G14440 | Adjacent NRPS |
| AFUA_4G14420 | -13 | 532  |                                                                        |                                | n/a          | Afu4g14420 | AFUA_4G14420 |               |

## Afu5g10120 cluster

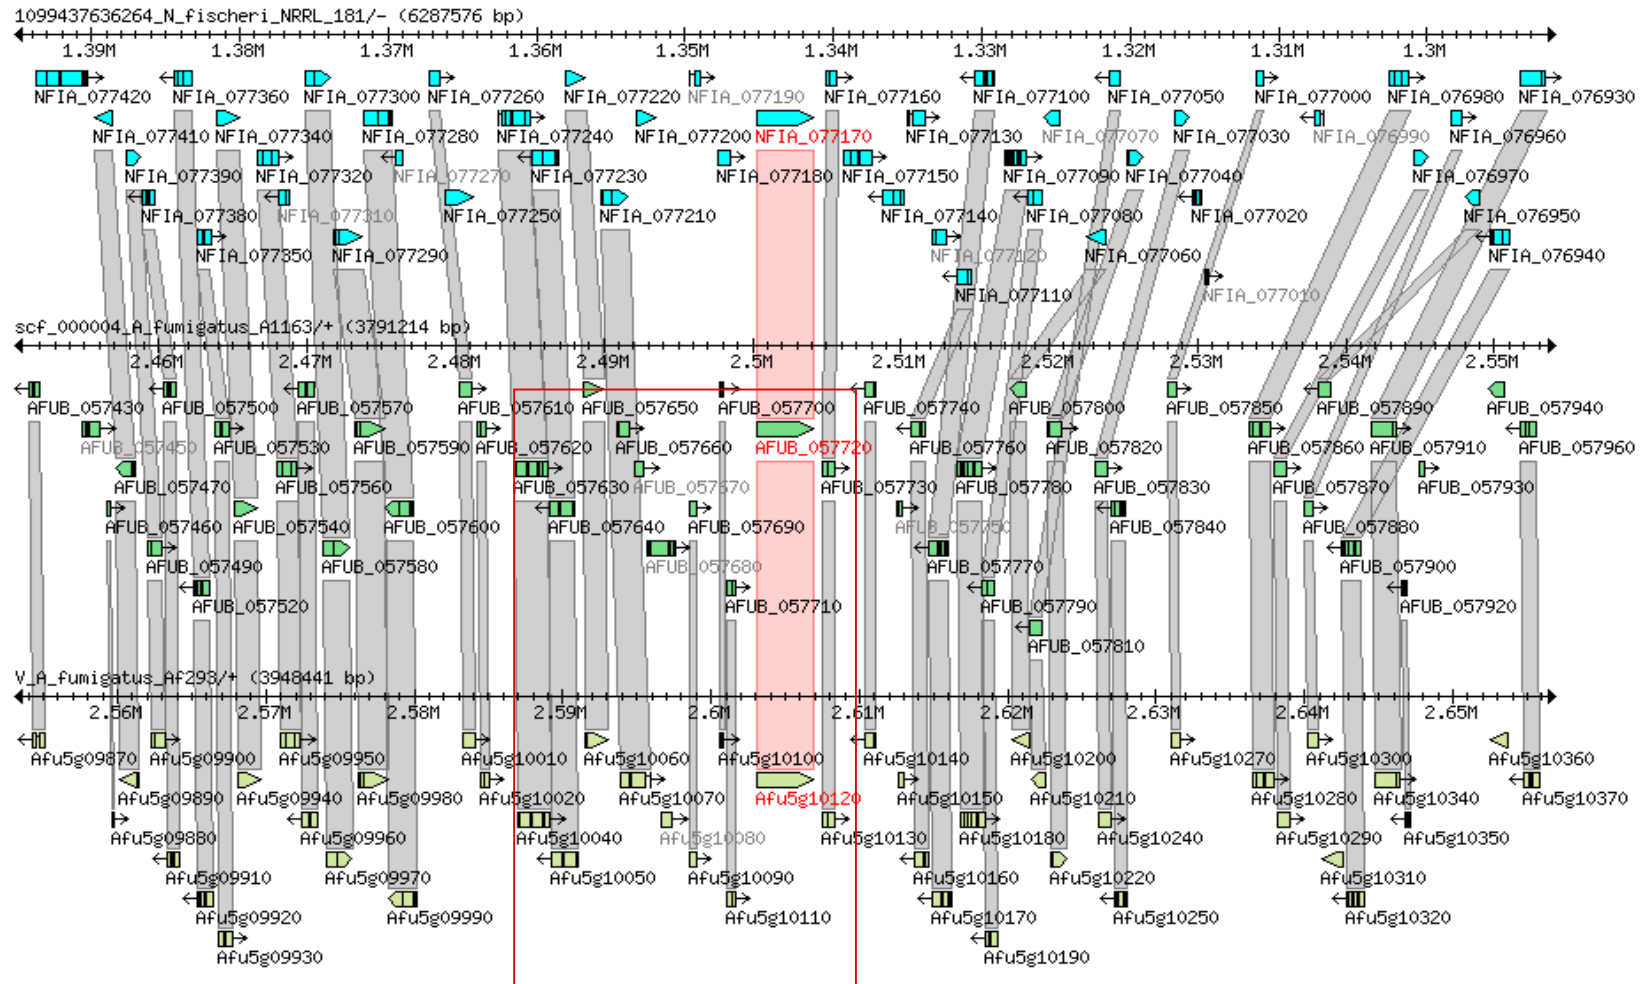

**Afu5g10120 cluster**

| Gene id (SMURF)     | Gene positions | Gene distance | Annotated_gene_function (SMURF)                             | AspGD gene name | AspGD supplementary annotation | antiSMASH ID       | Gene ID (I)       | Gene ID (II)        |
|---------------------|----------------|---------------|-------------------------------------------------------------|-----------------|--------------------------------|--------------------|-------------------|---------------------|
| AFUA_5G10250        | 12             | 200           | conserved hypothetical protein                              |                 |                                | n/a                | Afu5g10250        | AFUA_5G10250        |
| AFUA_5G10240        | 11             | 2079          | conserved hypothetical protein                              |                 |                                | prot_ID_873        | Afu5g10240        | AFUA_5G10240        |
| AFUA_5G10220        | 10             | 407           | alcohol dehydrogenase, zinc-containing, putative            |                 |                                | prot_ID_872        | Afu5g10220        | AFUA_5G10220        |
| AFUA_5G10210        | 9              | 153           | conserved hypothetical protein                              |                 |                                | prot_ID_871        | Afu5g10210        | AFUA_5G10210        |
| AFUA_5G10200        | 8              | 980           | hypothetical protein                                        |                 |                                | prot_ID_870        | Afu5g10200        | AFUA_5G10200        |
| AFUA_5G10190        | 7              | 25            | conserved hypothetical protein                              |                 |                                | prot_ID_869        | Afu5g10190        | AFUA_5G10190        |
| AFUA_5G10180        | 6              | 636           | salicylate hydroxylase, putative                            |                 |                                | prot_ID_868        | Afu5g10180        | AFUA_5G10180        |
| AFUA_5G10170        | 5              | 218           | pectin lyase                                                |                 |                                | prot_ID_867        | Afu5g10170        | AFUA_5G10170        |
| AFUA_5G10160        | 4              | 621           | NmrA-like family protein                                    |                 |                                | prot_ID_866        | Afu5g10160        | AFUA_5G10160        |
| AFUA_5G10150        | 3              | 1509          | hypothetical protein                                        |                 |                                | prot_ID_865        | Afu5g10150        | AFUA_5G10150        |
| AFUA_5G10140        | 2              | 1984          | MFS multidrug transporter, putative                         |                 |                                | prot_ID_864        | Afu5g10140        | AFUA_5G10140        |
| AFUA_5G10130        | 1              | 650           | <b>bZIP transcription factor, putative</b>                  |                 |                                | prot_ID_863        | Afu5g10130        | AFUA_5G10130 ECS    |
| <b>AFUA_5G10120</b> | 0              | 0             | <b>NRPS-like enzyme, putative</b>                           |                 |                                | <b>prot_ID_862</b> | <b>Afu5g10120</b> | <b>AFUA_5G10120</b> |
| AFUA_5G10110        | -1             | 1424          | <b>conserved hypothetical protein</b>                       |                 |                                | prot_ID_861        | Afu5g10110        | AFUA_5G10110        |
| AFUA_5G10100        | -2             | 177           | <b>conserved hypothetical protein</b>                       |                 |                                | prot_ID_860        | Afu5g10100        | AFUA_5G10100        |
| AFUA_5G10090        | -3             | 1526          | <b>3-demethylubiquinone-9 3-methyltransferase, putative</b> |                 |                                | prot_ID_859        | Afu5g10090        | AFUA_5G10090        |
| AFUA_5G10080        | -4             | 1027          | <b>conserved hypothetical protein</b>                       |                 |                                | prot_ID_858        | Afu5g10080        | AFUA_5G10080        |
| AFUA_5G10070        | -5             | 721           | <b>3-hydroxyacyl-CoA dehydrogenase, putative</b>            |                 |                                | prot_ID_857        | Afu5g10070        | AFUA_5G10070        |
| AFUA_5G10060        | -6             | 843           | <b>cytochrome b5 reductase, putative</b>                    |                 |                                | prot_ID_856        | Afu5g10060        | AFUA_5G10060        |
| AFUA_5G10050        | -7             | 484           | <b>cytochrome P450 monooxygenase, putative</b>              |                 |                                | prot_ID_855        | Afu5g10050        | AFUA_5G10050        |
| AFUA_5G10040        | -8             | 81            | <b>C6 transcription factor, putative</b>                    |                 |                                | prot_ID_854        | Afu5g10040        | AFUA_5G10040 FA     |
| AFUA_5G10020        | -9             | 1897          | sensor histidine kinase/response regulator, putative        |                 |                                | prot_ID_853        | Afu5g10020        | AFUA_5G10020        |
| AFUA_5G10010        | -10            | 350           | extracellular serine-threonine rich protein                 |                 |                                | prot_ID_852        | Afu5g10010        | AFUA_5G10010        |
| AFUA_5G09990        | -11            | 3165          | C6 transcription factor, putative                           |                 |                                | n/a                | Afu5g09990        | AFUA_5G09990        |
| AFUA_5G09980        | -12            | 68            | acyl-CoA dehydrogenase, putative                            |                 |                                | n/a                | Afu5g09980        | AFUA_5G09980        |

|              |     |     |                                                     |     |            |              |
|--------------|-----|-----|-----------------------------------------------------|-----|------------|--------------|
| AFUA_5G09970 | -13 | 267 | 67 kDa myosin-cross-reactive antigen family protein | n/a | Afu5g09970 | AFUA_5G09970 |
|--------------|-----|-----|-----------------------------------------------------|-----|------------|--------------|

## Afu5g12730 cluster

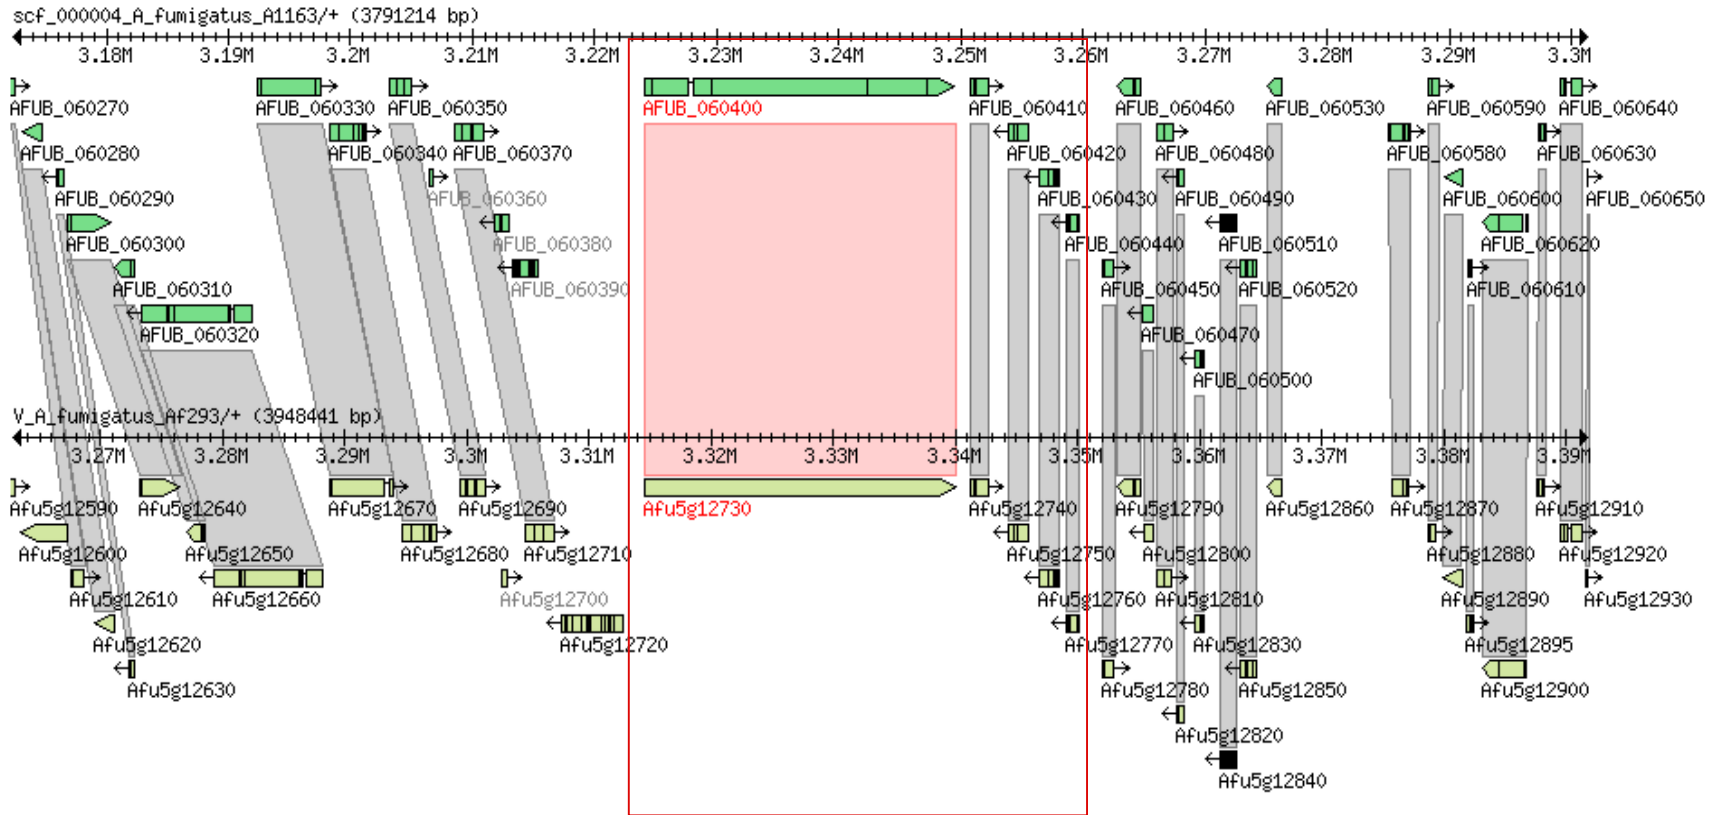



**Afu5g12730 cluster**

| Gene id (SMURF)     | Gene positions | Gene distance | Annotated_gene_function (SMURF)                                                    | AspGD gene name   | AspGD supplementary annotation            | antiSMASH ID        | Gene ID (I)       | Gene ID (II)            |
|---------------------|----------------|---------------|------------------------------------------------------------------------------------|-------------------|-------------------------------------------|---------------------|-------------------|-------------------------|
| n/a                 |                |               |                                                                                    |                   | Protein of unknown function               | n/a                 | Afu5g12860        | AFUA_5G12860            |
| n/a                 |                |               |                                                                                    |                   | Cell morphogenesis protein Las1, putative | n/a                 | Afu5g12850        | AFUA_5G12850            |
| AFUA_5G12840        | 11             | 1361          | hydroxyacylglutathione hydrolase, putative                                         |                   |                                           | n/a                 | Afu5g12840        | AFUA_5G12840            |
| AFUA_5G12830        | 10             | 888           | DUF1264 domain protein                                                             |                   |                                           | n/a                 | Afu5g12830        | AFUA_5G12830            |
| AFUA_5G12820        | 9              | 179           | mitochondrial inner membrane protease subunit 1, putative                          |                   |                                           | prot_ID_1113        | Afu5g12830        | AFUA_5G12830            |
| AFUA_5G12810        | 8              | 405           | mitochondrial large ribosomal subunit YmL35, putative                              |                   |                                           | prot_ID_1111        | Afu5g12810        | AFUA_5G12810            |
| AFUA_5G12800        | 7              | 230           | 50S ribosomal protein L4 mitochondrial 3-hydroxyisobutyryl-CoA hydrolase, putative |                   |                                           | prot_ID_1110        | Afu5g12800        | AFUA_5G12800            |
| AFUA_5G12790        | 6              | 185           |                                                                                    |                   |                                           | prot_ID_1109        | Afu5g12790        | AFUA_5G12790            |
| AFUA_5G12780        | 5              | 1936          | Kelch repeat protein                                                               |                   |                                           | prot_ID_1108        | Afu5g12780        | AFUA_5G12780            |
| AFUA_5G12770        | 4              | 675           | metallobeta-lactamase family protein                                               |                   |                                           | prot_ID_1107        | Afu5g12770        | AFUA_5G12770 FA         |
| AFUA_5G12760        | 3              | 968           | CCCH zinc finger DNA binding protein                                               |                   |                                           | prot_ID_1106        | Afu5g12760        | AFUA_5G12760            |
| AFUA_5G12750        | 2              | 1540          | hypothetical protein                                                               |                   |                                           | prot_ID_1105        | Afu5g12750        | AFUA_5G12750            |
| AFUA_5G12740        | 1              | 1153          | MFS multidrug transporter, putative                                                |                   |                                           | prot_ID_1104        | Afu5g12740        | AFUA_5G12740            |
| <b>AFUA_5G12730</b> | 0              | 0             | nonribosomal peptide synthase, putative                                            | <b>nrps8/pesI</b> |                                           | <b>prot_ID_1103</b> | <b>Afu5g12730</b> | <b>AFUA_5G12730</b> ECS |
| AFUA_5G12720        | -1             | 1815          | ABC multidrug transporter, putative                                                |                   |                                           | prot_ID_1102        | Afu5g12720        | AFUA_5G12720            |
| n/a                 |                |               |                                                                                    |                   |                                           | prot_ID_1101        | Afu5g12710        | AFUA_5G12710            |
| n/a                 |                |               |                                                                                    |                   |                                           | prot_ID_1100        | Afu5g12700        | AFUA_5G12700            |
| n/a                 |                |               |                                                                                    |                   | Dihydroxyacetone kinase                   | prot_ID_1099        | Afu5g12690        | AFUA_5G12690            |
| n/a                 |                |               |                                                                                    |                   | Ubiquitin ligase subunit CulD             | prot_ID_1098        | Afu5g12680        | AFUA_5G12680            |

## Afu6g03480 cluster

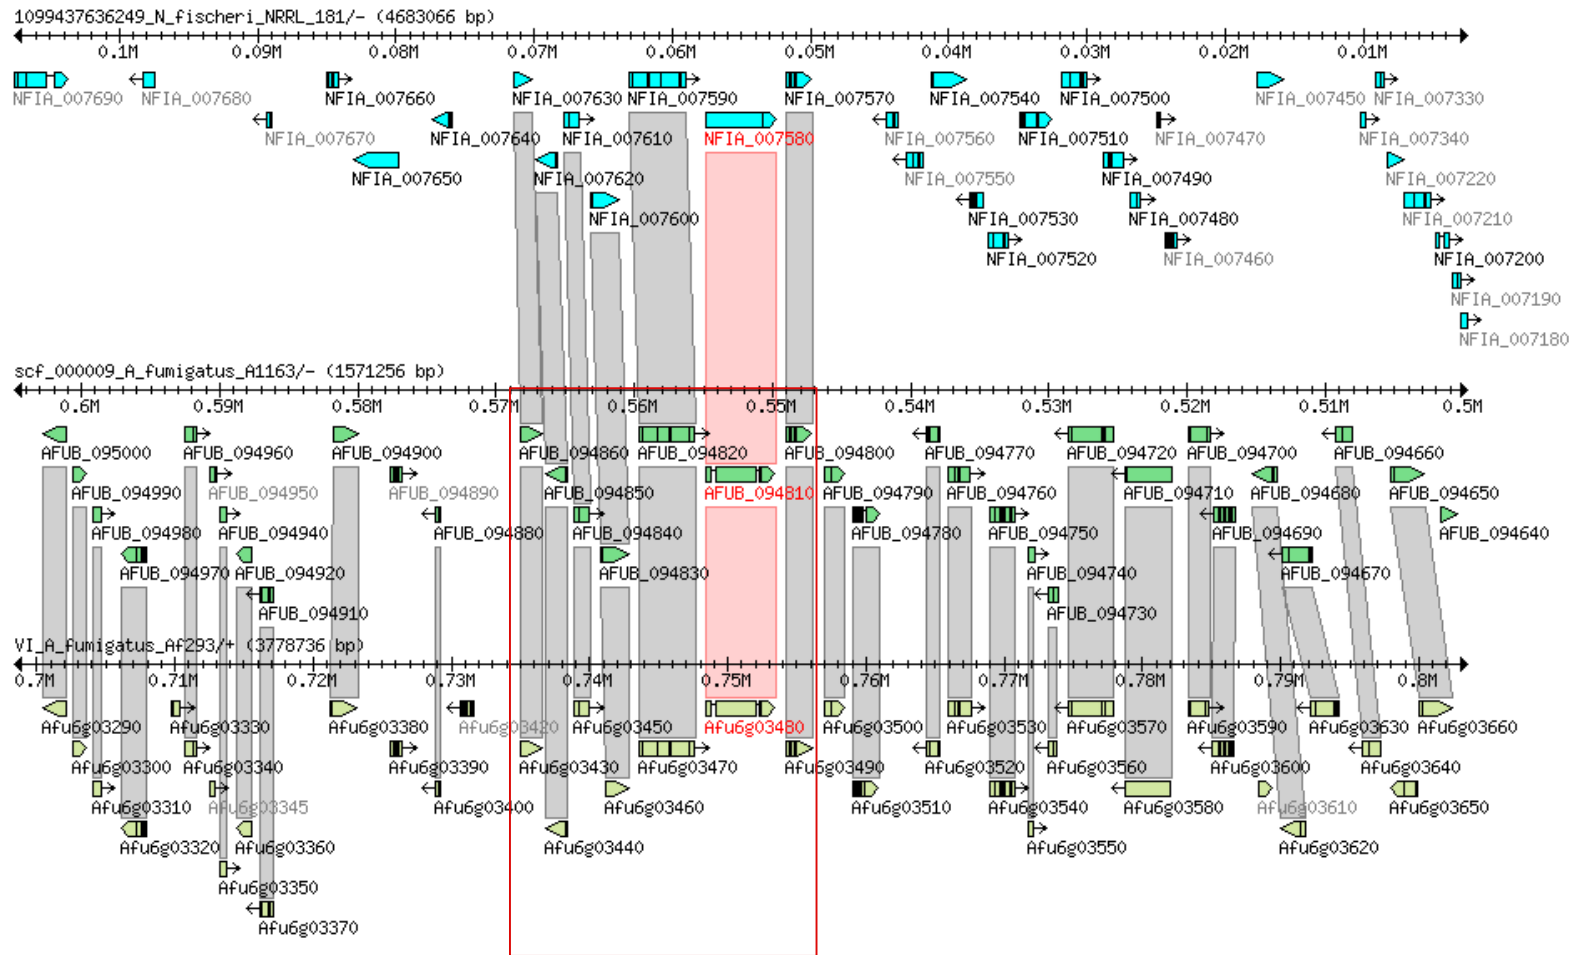

**Afu6g03480 cluster**

| Gene id (SMURF)     | Gene positions | Gene distance | Annotated_gene_function (SMURF)                                       | AspGD gene name | AspGD supplementary annotation | antiSMASH ID       | Gene ID (I)       | Gene ID (II)          |
|---------------------|----------------|---------------|-----------------------------------------------------------------------|-----------------|--------------------------------|--------------------|-------------------|-----------------------|
| AFUA_6G03620        | 13             | 3315          | FAD/FMN-containing isoamyl alcohol oxidase MreA                       |                 |                                | n/a                | Afu6g03620        | AFUA_6G03620          |
| AFUA_6G03600        | 12             | 214           | integral membrane protein (Pth11), putative                           |                 |                                | n/a                | Afu6g03600        | AFUA_6G03600          |
| AFUA_6G03590        | 11             | 1201          | citrate synthase Cit1, putative                                       |                 |                                | n/a                | Afu6g03590        | AFUA_6G03590          |
| AFUA_6G03580        | 10             | 830           | mRNA-nucleus export ATPase (Elf1), putative                           |                 |                                | n/a                | Afu6g03580        | AFUA_6G03580          |
| AFUA_6G03570        | 9              | 791           | beta-glucosidase, putative                                            |                 |                                | n/a                | Afu6g03570        | AFUA_6G03570          |
| AFUA_6G03560        | 8              | 1031          | IgE-binding protein, putative                                         |                 |                                | n/a                | Afu6g03560        | AFUA_6G03560          |
| AFUA_6G03550        | 7              | 945           | conserved hypothetical protein                                        |                 |                                | prot_ID_235        | Afu6g03550        | AFUA_6G03550          |
| AFUA_6G03540        | 6              | 1367          | malate synthase AcuE                                                  |                 |                                | prot_ID_234        | Afu6g03540        | AFUA_6G03540          |
| AFUA_6G03530        | 5              | 641           | glutamine synthetase, putative short-chain                            |                 |                                | prot_ID_233        | Afu6g03530        | AFUA_6G03530          |
| AFUA_6G03520        | 4              | 3319          | dehydrogenase/reductase family protein, putative                      |                 |                                | prot_ID_232        | Afu6g03520        | AFUA_6G03520          |
| AFUA_6G03510        | 3              | 620           | flavin containing polyamine oxidase, putative                         |                 |                                | prot_ID_231        | Afu6g03510        | AFUA_6G03510          |
| AFUA_6G03500        | 2              | 803           | conserved hypothetical protein                                        |                 |                                | prot_ID_230        | Afu6g03500        | AFUA_6G03500          |
| AFUA_6G03490        | 1              | 670           | phenol 2-monooxygenase, putative                                      |                 |                                | prot_ID_229        | Afu6g03490        | AFUA_6G03490 ECS      |
| <b>AFUA_6G03480</b> | 0              | 0             | <b>NRPS-like enzyme, putative ABC multidrug transporter, putative</b> |                 |                                | <b>prot_ID_228</b> | <b>Afu6g03480</b> | <b>AFUA_6G03480</b>   |
| AFUA_6G03470        | -1             | 724           |                                                                       |                 |                                | prot_ID_227        | Afu6g03470        | AFUA_6G03470          |
| AFUA_6G03460        | -2             | 672           | conserved hypothetical protein                                        |                 |                                | prot_ID_226        | Afu6g03460        | AFUA_6G03460          |
| AFUA_6G03450        | -3             | 1078          | N-methyltransferase, putative fructosyl amino acid oxidase, putative  |                 |                                | prot_ID_225        | Afu6g03450        | AFUA_6G03450          |
| AFUA_6G03440        | -4             | 577           | C6 finger domain protein, putative                                    |                 |                                | prot_ID_224        | Afu6g03440        | AFUA_6G03440          |
| AFUA_6G03430        | -5             | 217           |                                                                       |                 |                                | prot_ID_223        | Afu6g03430        | AFUA_6G03430 ECS, IGD |
| n/a                 |                |               |                                                                       |                 | Trehalase phosphorylase        | prot_ID_222        | Afu6g03420        | AFUA_6G03420          |
| n/a                 |                |               |                                                                       |                 | Protein of unknown function    | prot_ID_221        | Afu6g03400        | AFUA_6G03400          |

# Afu6g08560 cluster

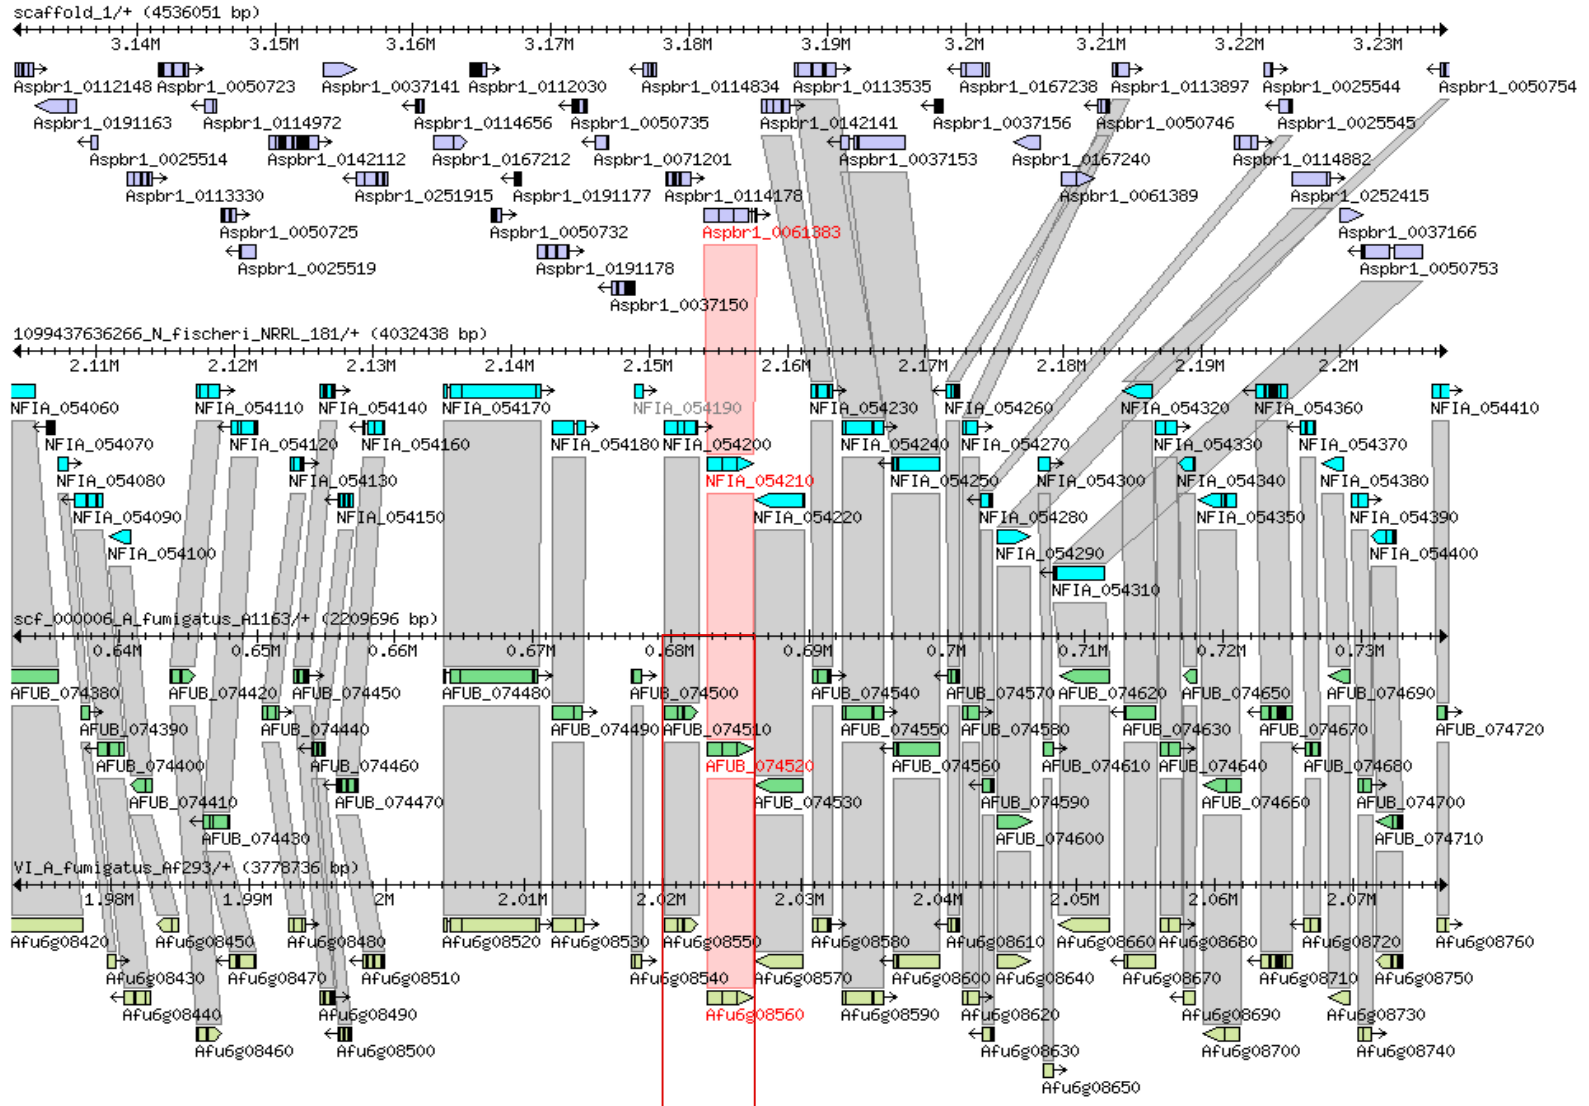

**Afu6g08560 cluster**

| Gene id (SMURF)     | Gene positions | Gene distance | Annotated_gene_function (SMURF)          | AspGD gene name | AspGD supplementary annotation                       | antiSMASH ID       | Gene ID (I)       | Gene ID (II)            |
|---------------------|----------------|---------------|------------------------------------------|-----------------|------------------------------------------------------|--------------------|-------------------|-------------------------|
| n/a                 |                |               |                                          |                 | adenylate cyclase AcyA                               | prot_ID_628        | Afu6g08520        | AFUA_6G08520            |
| n/a                 |                |               |                                          |                 | sister chromatid separation protein (Src1), putative | prot_ID_629        | Afu6g08530        | AFUA_6G08530            |
| AFUA_6G08540        | 2              | 1607          | C6 transcription factor SndA, putative   |                 |                                                      | prot_ID_630        | Afu6g08540        | AFUA_6G08540            |
| AFUA_6G08550        | 1              | 619           | <b>C6 transcription factor, putative</b> |                 |                                                      | prot_ID_631        | Afu6g08550        | AFUA_6G08550 ECS        |
| <b>AFUA_6G08560</b> | 0              | 0             | <b>NRPS-like enzyme, putative</b>        |                 |                                                      | <b>prot_ID_632</b> | <b>Afu6g08560</b> | <b>AFUA_6G08560</b> ECS |
| n/a                 |                |               |                                          |                 | DNA damage repair protein Mus42                      | prot_ID_633        | Afu6g08570        | AFUA_6G08570            |
| n/a                 |                |               |                                          | fkbp4           | FKBP-type peptidyl-prolyl isomerase                  | prot_ID_634        | Afu6g08580        | AFUA_6G08580            |
| n/a                 |                |               |                                          |                 | Protein serine/threonine kinase                      | prot_ID_635        | Afu6g08590        | AFUA_6G08590            |
| n/a                 |                |               |                                          |                 | Transcription factor TFIID complex 145 kDasubunit    | prot_ID_636        | Afu6g08600        | AFUA_6G08600            |
| n/a                 |                |               |                                          |                 | RNA methyltransferase                                | prot_ID_637        | Afu6g08610        | AFUA_6G08610            |
| n/a                 |                |               |                                          |                 | Protein of unknown function                          | prot_ID_638        | Afu6g08620        | AFUA_6G08620            |
| n/a                 |                |               |                                          |                 | Protein of unknown function                          | prot_ID_639        | Afu6g08630        | AFUA_6G08630            |
| n/a                 |                |               |                                          |                 | Metalloendopeptidase                                 | prot_ID_640        | Afu6g08640        | AFUA_6G08640            |

# Afu6g12080 cluster

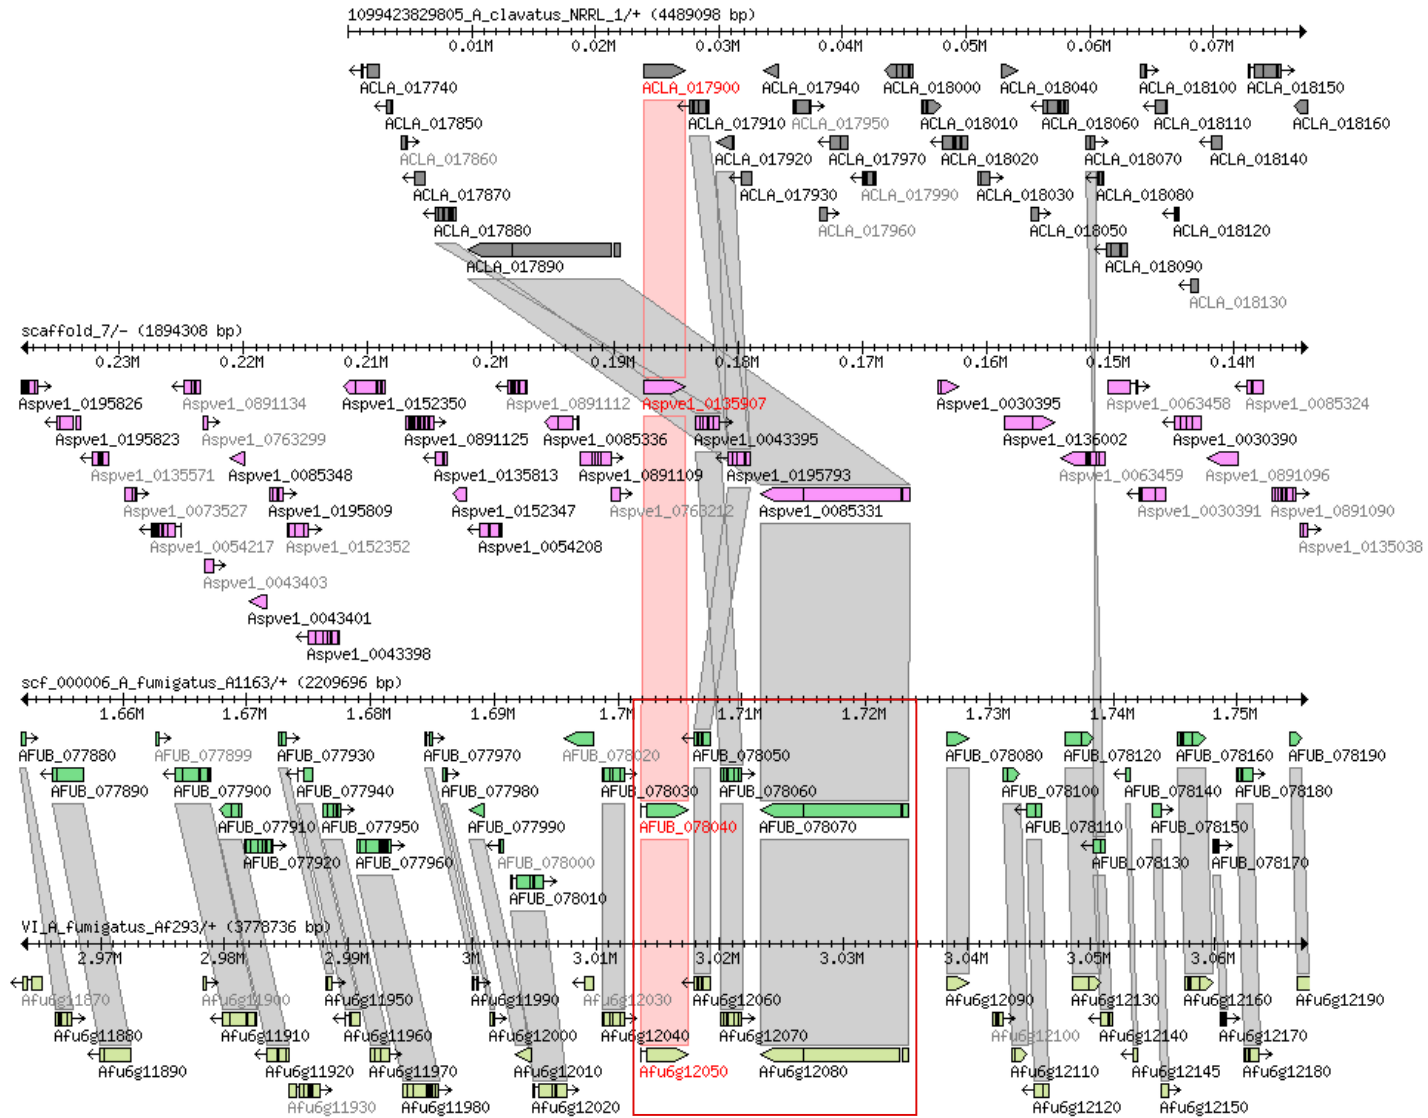

**Afu6g12080 cluster**

| Gene id (SMURF)     | Gene positions | Gene distance | Annotated_gene_function (SMURF)                                      | AspGD gene name | AspGD supplementary annotation | antiSMASH ID       | Gene ID (I)       | Gene ID (II)            |
|---------------------|----------------|---------------|----------------------------------------------------------------------|-----------------|--------------------------------|--------------------|-------------------|-------------------------|
| n/a                 |                |               |                                                                      |                 | Protein of unknown function    | prot_ID_952        | Afu6g11980        | AFUA_6G11980            |
| n/a                 |                |               |                                                                      |                 | Protein of unknown function    | prot_ID_953        | Afu6g11990        | AFUA_6G11990            |
| n/a                 |                |               |                                                                      |                 | Protein of unknown function    | prot_ID_954        | Afu6g12000        | AFUA_6G12000            |
| n/a                 |                |               |                                                                      |                 | Hydrolase                      | prot_ID_955        | Afu6g12010        | AFUA_6G12010            |
| n/a                 |                |               |                                                                      |                 | C2H2 finger domain protein     | prot_ID_956        | Afu6g12020        | AFUA_6G12020            |
| n/a                 |                |               |                                                                      |                 | Rhamnosidase                   | prot_ID_957        | Afu6g12030        | AFUA_6G12030            |
| AFUA_6G12040        | 4              | 1252          | MFS sugar permease, putative nonribosomal peptide synthase, putative |                 |                                | prot_ID_958        | Afu6g12040        | AFUA_6G12040 ECS        |
| AFUA_6G12050        | 3              | 401           | MAK1-like monooxygenase, putative                                    |                 |                                | <b>prot_ID_959</b> | <b>Afu6g12050</b> | <b>AFUA_6G12050</b>     |
| AFUA_6G12060        | 2              | 829           |                                                                      |                 |                                | prot_ID_960        | Afu6g12060        | AFUA_6G12060            |
| AFUA_6G12070        | 1              | 1390          | FAD binding domain protein nonribosomal peptide synthase, putative   |                 |                                | prot_ID_961        | Afu6g12070        | AFUA_6G12070            |
| <b>AFUA_6G12080</b> | 0              | 0             |                                                                      |                 |                                | <b>prot_ID_962</b> | <b>Afu6g12080</b> | <b>AFUA_6G12080</b> ECS |
| AFUA_6G12090        | -1             | 3032          | HET domain protein                                                   |                 |                                | prot_ID_963        | Afu6g12090        | AFUA_6G12090            |
| AFUA_6G12100        | -2             | 1903          | nitrilase family protein                                             |                 |                                | prot_ID_964        | Afu6g12100        | AFUA_6G12100            |
| AFUA_6G12110        | -3             | 610           | salicylate synthetase, putative                                      |                 |                                | prot_ID_965        | Afu6g12110        | AFUA_6G12110            |
| AFUA_6G12120        | -4             | 425           | BNR/Asp-box repeat domain protein                                    |                 |                                | prot_ID_966        | Afu6g12120        | AFUA_6G12120            |
| AFUA_6G12130        | -5             | 1972          | C6 transcription factor, putative                                    |                 |                                | prot_ID_967        | Afu6g12130        | AFUA_6G12130            |
| AFUA_6G12140        | -6             | 41            | hypothetical protein                                                 |                 |                                | prot_ID_968        | Afu6g12140        | AFUA_6G12140            |
| AFUA_6G12145        | -7             | 1771          | hypothetical protein                                                 |                 |                                | prot_ID_1233       | Afu6g12145        | AFUA_6G12145            |
| AFUA_6G12150        | -8             | 1987          | bZIP transcription factor (Atf7), putative                           |                 |                                | n/a                | Afu6g12150        | AFUA_6G12150            |
| AFUA_6G12160        | -9             | 1305          | C6 transcription factor, putative                                    |                 |                                | n/a                | Afu6g12160        | AFUA_6G12160            |

# Afu6g13930 cluster

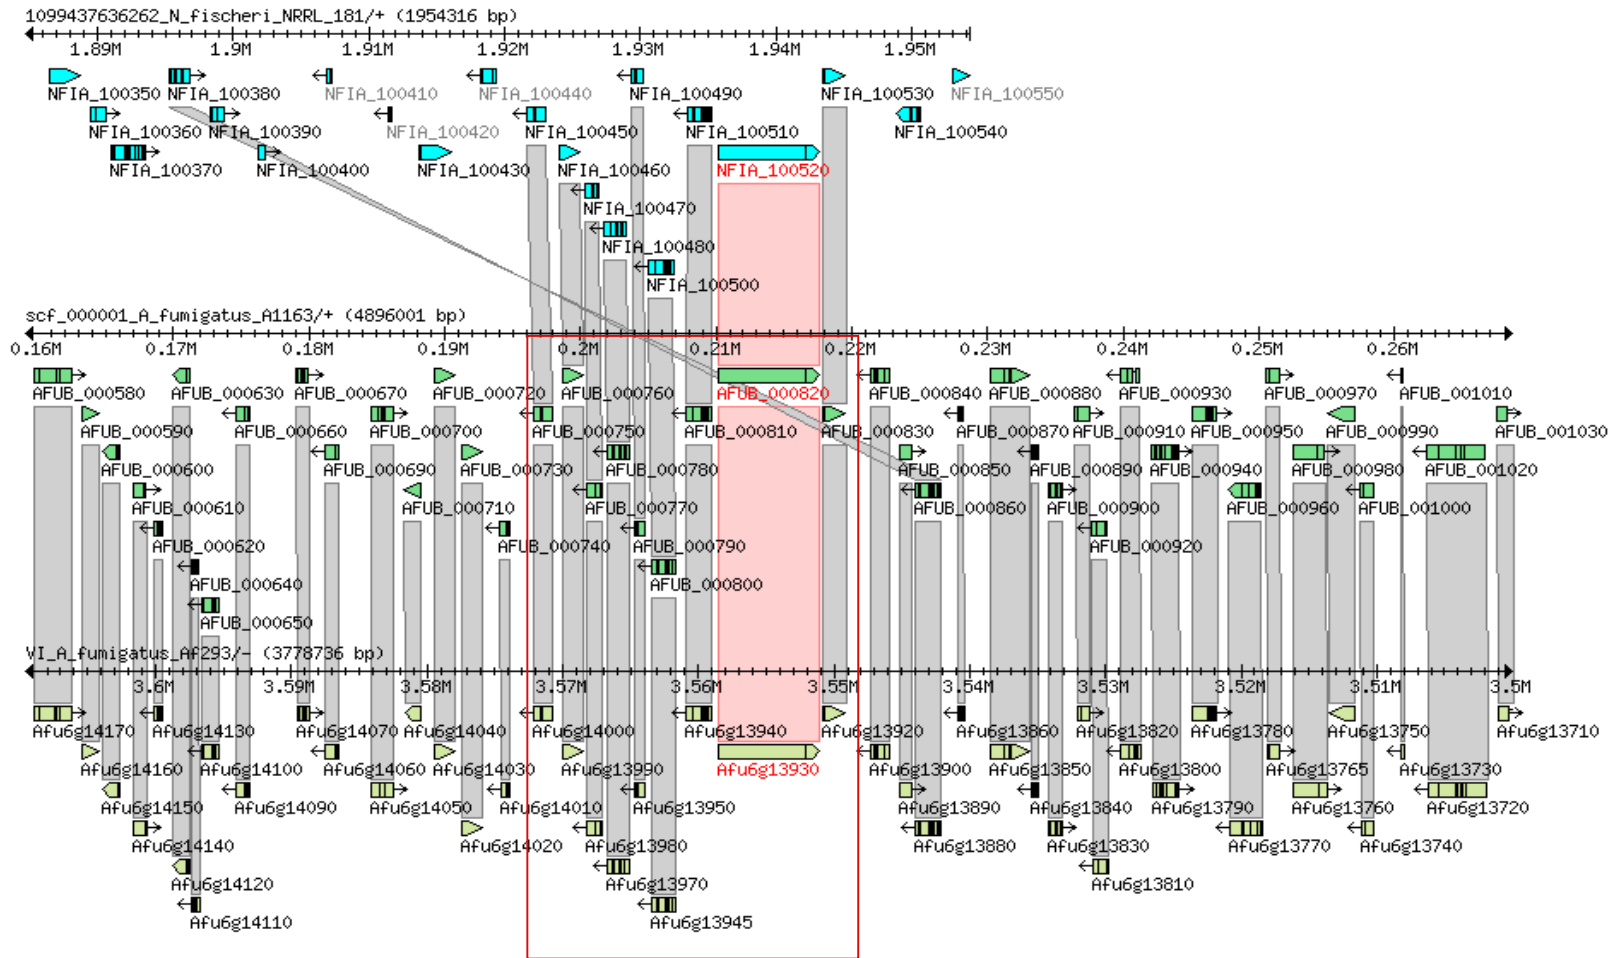



**Afu6g13930 cluster**

| Gene id (SMURF)     | Gene positions | Gene distance | Annotated_gene_function (SMURF)                                        | AspGD gene name | AspGD supplementary annotation<br>Putative het locus with a predicted role in heterokaryon incompatibility | antiSMASH ID        | Gene ID (I)       | Gene ID (II)        |     |
|---------------------|----------------|---------------|------------------------------------------------------------------------|-----------------|------------------------------------------------------------------------------------------------------------|---------------------|-------------------|---------------------|-----|
| n/a                 |                |               |                                                                        |                 |                                                                                                            | prot_ID_1127        | Afu6g13820        | AFUA_6G13820        |     |
| AFUA_6G13830        | 8              | 720           | oxidoreductase, short chain dehydrogenase/reductase family             |                 |                                                                                                            | prot_ID_1128        | Afu6g13830        | AFUA_6G13830        |     |
| AFUA_6G13840        | 7              | 168           | conserved hypothetical protein                                         |                 |                                                                                                            | prot_ID_1129        | Afu6g13840        | AFUA_6G13840        |     |
| AFUA_6G13850        | 6              | 1981          | GTPase activating protein (Evi5), putative                             |                 |                                                                                                            | prot_ID_1130        | Afu6g13850        | AFUA_6G13850        |     |
| AFUA_6G13860        | 5              | 1203          | conserved hypothetical protein                                         |                 |                                                                                                            | prot_ID_1131        | Afu6g13860        | AFUA_6G13860        |     |
| AFUA_6G13880        | 4              | 170           | MFS transporter, putative                                              |                 |                                                                                                            | prot_ID_1132        | Afu6g13880        | AFUA_6G13880        |     |
| AFUA_6G13890        | 3              | 723           | conserved hypothetical protein                                         |                 |                                                                                                            | prot_ID_1133        | Afu6g13890        | AFUA_6G13890        |     |
| AFUA_6G13900        | 2              | 1743          | conserved hypothetical protein                                         |                 |                                                                                                            | prot_ID_1134        | Afu6g13900        | AFUA_6G13900        |     |
| AFUA_6G13920        | 1              | 240           | adenylate-forming enzyme, putative                                     |                 |                                                                                                            | prot_ID_1135        | Afu6g13920        | AFUA_6G13920        | ECS |
| <b>AFUA_6G13930</b> | 0              | 0             | polyketide synthase LovB-like, putative                                |                 |                                                                                                            | <b>prot_ID_1136</b> | <b>Afu6g13930</b> | <b>AFUA_6G13930</b> |     |
| AFUA_6G13940        | -1             | 494           | cytochrome P450 monooxygenase, putative                                |                 |                                                                                                            | prot_ID_1137        | Afu6g13940        | AFUA_6G13940        |     |
| AFUA_6G13945        | -2             | 829           | cytochrome P450 monooxygenase, putative                                |                 |                                                                                                            | prot_ID_1213        | Afu6g13945        | AFUA_6G13945        |     |
| AFUA_6G13950        | -3             | 478           | integral membrane protein FAD-dependent monooxygenase (PaxM), putative |                 |                                                                                                            | prot_ID_1138        | Afu6g13950        | AFUA_6G13950        |     |
| AFUA_6G13970        | -4             | 366           | UbiA-like prenyltransferase, putative                                  |                 |                                                                                                            | prot_ID_1139        | Afu6g13970        | AFUA_6G13970        |     |
| AFUA_6G13980        | -5             | 355           |                                                                        |                 |                                                                                                            | prot_ID_1140        | Afu6g13980        | AFUA_6G13980        |     |
| AFUA_6G13990        | -6             | 296           | acetyltransferase, putative                                            |                 |                                                                                                            | prot_ID_1141        | Afu6g13990        | AFUA_6G13990        |     |
| AFUA_6G14000        | -7             | 751           | toxin biosynthesis protein Tri7-like, putative                         |                 |                                                                                                            | prot_ID_1142        | Afu6g14000        | AFUA_6G14000        | ECS |
| AFUA_6G14010        | -8             | 1714          | GPI anchored protein, putative                                         |                 |                                                                                                            | prot_ID_1143        | Afu6g14010        | AFUA_6G14010        |     |
| AFUA_6G14020        | -9             | 1347          | conserved hypothetical protein                                         |                 |                                                                                                            | prot_ID_1144        | Afu6g14020        | AFUA_6G14020        |     |
| AFUA_6G14030        | -10            | 509           | acyltransferase, putative                                              |                 |                                                                                                            | prot_ID_1145        | Afu6g14030        | AFUA_6G14030        |     |
| AFUA_6G14040        | -11            | 1034          | glycosyl transferase, putative                                         |                 |                                                                                                            | n/a                 | Afu6g14040        | AFUA_6G14040        |     |
| AFUA_6G14050        | -12            | 809           | FAD binding domain protein                                             |                 |                                                                                                            | n/a                 | Afu6g14050        | AFUA_6G14050        |     |

# Afu7g00170 cluster

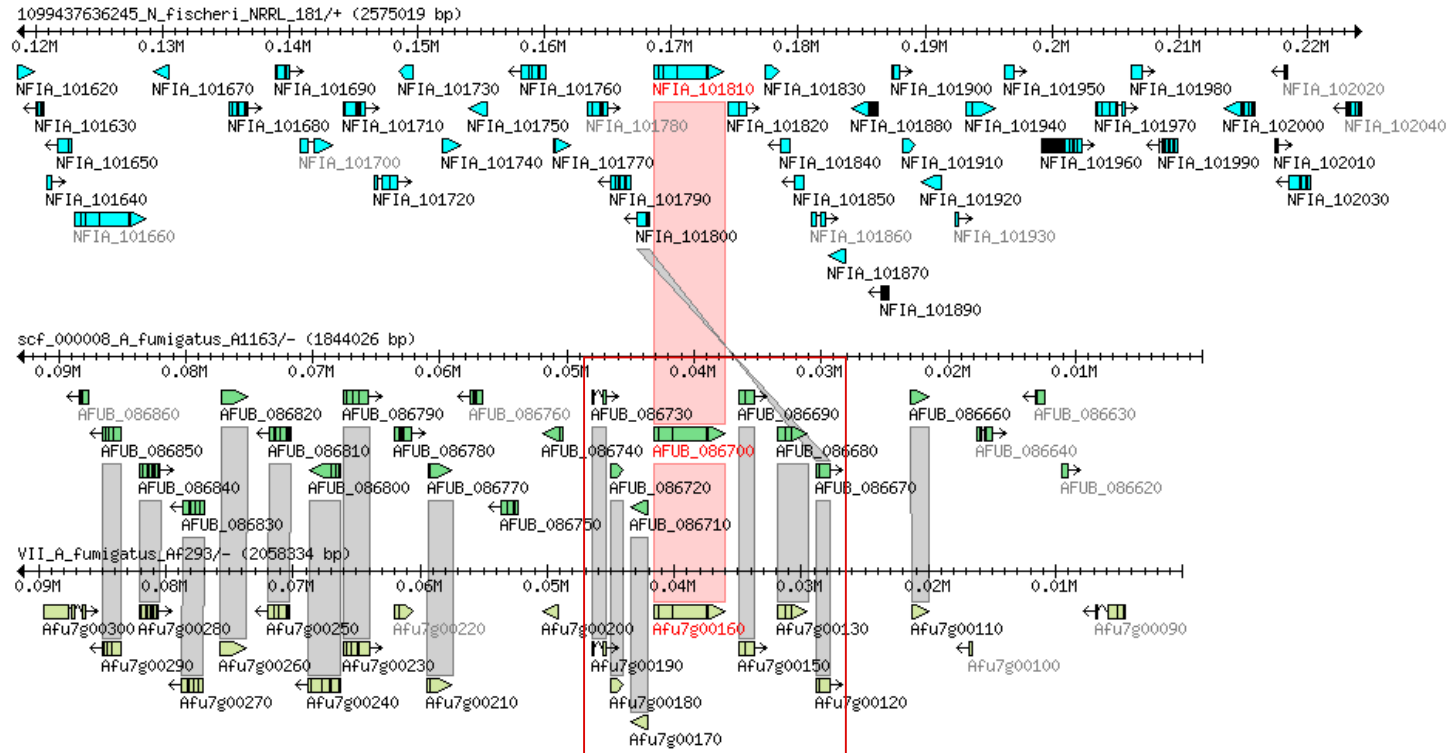

**Afu7g00170 cluster**

| Gene id (SMURF)     | Gene positions | Gene distance | Annotated_gene_function (SMURF)                                                | AspGD gene name | AspGD supplementary annotation | antiSMASH ID     | Gene ID (I)       | Gene ID (II)        |          |
|---------------------|----------------|---------------|--------------------------------------------------------------------------------|-----------------|--------------------------------|------------------|-------------------|---------------------|----------|
| n/a                 |                |               |                                                                                |                 | Transmembrane transporter      | prot_ID_13       | Afu7g00220        | AFUA_7G00220        |          |
| n/a                 |                |               |                                                                                |                 | C6 transcription factor        | prot_ID_12       | Afu7g00210        | AFUA_7G00210        |          |
| AFUA_7G00200        | 3              | 2662          | conserved hypothetical protein                                                 |                 |                                | prot_ID_11       | Afu7g00200        | AFUA_7G00200        |          |
| AFUA_7G00190        | 2              | 387           | Protein of unknown function                                                    |                 |                                | prot_ID_10       | Afu7g00190        | AFUA_7G00190        | ECS      |
| AFUA_7G00180        | 1              | 597           | Nucleoside-diphosphate sugar epimerase dimethylallyl tryptophan synthase GliD1 |                 |                                | prot_ID_9        | Afu7g00180        | AFUA_7G00180        |          |
| <b>AFUA_7G00170</b> | 0              | 0             |                                                                                |                 |                                | <b>prot_ID_8</b> | <b>Afu7g00170</b> | <b>AFUA_7G00170</b> |          |
| AFUA_7G00160        | -1             | 482           | polyketide synthase, putative                                                  |                 |                                | <b>prot_ID_7</b> | <b>Afu7g00160</b> | <b>AFUA_7G00160</b> |          |
| AFUA_7G00150        | -2             | 1049          | FAD-dependent monooxygenase, putative                                          |                 |                                | prot_ID_6        | Afu7g00150        | AFUA_7G00150        |          |
| AFUA_7G00130        | -3             | 1797          | C6 transcription factor, putative                                              |                 |                                | prot_ID_5        | Afu7g00130        | AFUA_7G00130        |          |
| AFUA_7G00120        | -4             | 588           | metallo-beta-lactamase domain protein                                          |                 |                                | prot_ID_4        | Afu7g00120        | AFUA_7G00120        | ECS, IGD |
| n/a                 |                |               |                                                                                |                 | Triglyceride lipase            | prot_ID_3        | Afu7g00110        | AFUA_7G00110        |          |
| n/a                 |                |               |                                                                                |                 | Protein of unknown function    | prot_ID_2        | Afu7g00100        | AFUA_7G00100        |          |

## Afu8g00540 cluster

Possible overlapping or adjacent clusters, no manual prediction made

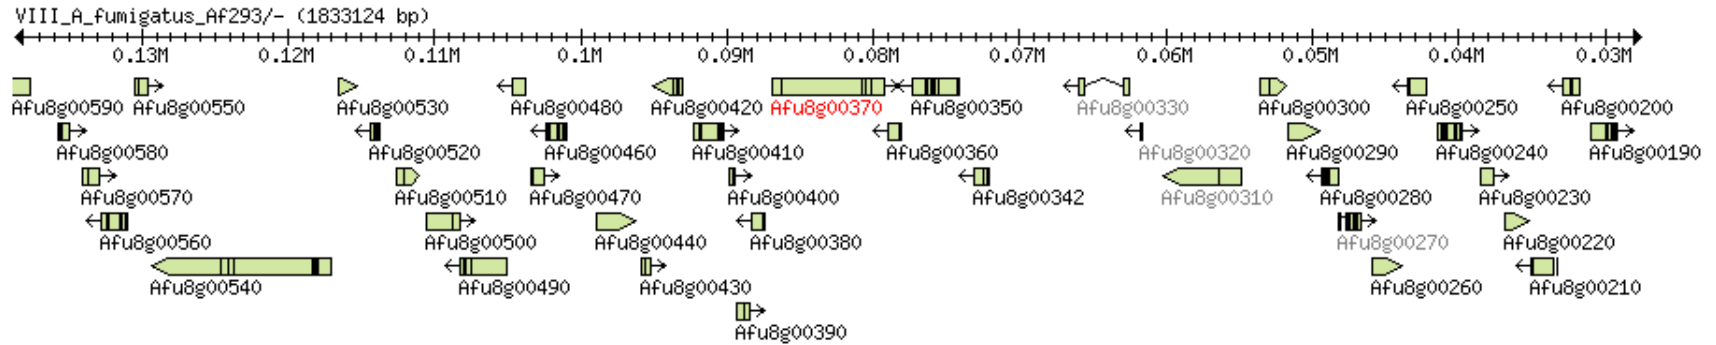

**Afu8g00540 cluster**

| Gene id (SMURF)     | Gene positions | Gene distance | Annotated_gene_function (SMURF)                    | AspGD gene name | AspGD supplementary annotation | antiSMASH ID | Gene ID (I)       | Gene ID (II)        |
|---------------------|----------------|---------------|----------------------------------------------------|-----------------|--------------------------------|--------------|-------------------|---------------------|
| AFUA_8G00620        | 9              | 3538          | dimethylallyl tryptophan synthase, putative        |                 |                                | n/a          | Afu8g00370        | AFUA_8G00620        |
| AFUA_8G00610        | 8              | 228           | cell surface protein Mas1, putative                |                 |                                | n/a          | Afu8g00610        | AFUA_8G00610        |
| AFUA_8G00600        | 7              | 541           | NAD dependent epimerase/dehydratase family protein |                 |                                | n/a          | Afu8g00600        | AFUA_8G00600        |
| AFUA_8G00595        | 6              | 1189          | Ham1 family pyrophosphatase, putative              |                 |                                | n/a          | Afu8g00595        | AFUA_8G00595        |
| AFUA_8G00590        | 5              | 2026          | fatty acid desaturase, putative                    |                 |                                | n/a          | Afu8g00590        | AFUA_8G00590        |
| AFUA_8G00580        | 4              | 825           | glutathione S-transferase, putative                |                 |                                | n/a          | Afu8g00580        | AFUA_8G00580        |
| AFUA_8G00570        | 3              | 89            | alpha/beta hydrolase, putative                     |                 |                                | n/a          | Afu8g00570        | AFUA_8G00570        |
| AFUA_8G00560        | 2              | 539           | cytochrome P450 oxidoreductase, putative           |                 |                                | n/a          | Afu8g00560        | AFUA_8G00560        |
| AFUA_8G00550        | 1              | 235           | methyltransferase SirN-like, putative              |                 |                                | n/a          | Afu8g00550        | AFUA_8G00550        |
| <b>AFUA_8G00540</b> | 0              | 0             | <b>hybrid PKS-NRPS enzyme, putative</b>            | <b>nrps14</b>   |                                | n/a          | <b>Afu8g00540</b> | <b>AFUA_8G00540</b> |
| AFUA_8G00530        | -1             | 463           | alpha/beta superfamily hydrolase                   |                 |                                | n/a          | Afu8g00530        | AFUA_8G00530        |
| AFUA_8G00520        | -2             | 780           | integral membrane protein                          |                 |                                | n/a          | Afu8g00520        | AFUA_8G00520        |
| AFUA_8G00510        | -3             | 1148          | cytochrome P450 oxidoreductase OrfA-like, putative |                 |                                | n/a          | Afu8g00510        | AFUA_8G00510        |
| AFUA_8G00500        | -4             | 409           | acetate-CoA ligase, putative                       |                 |                                | n/a          | Afu8g00500        | AFUA_8G00500        |
| AFUA_8G00490        | -5             | 48            | <b>PKS-like enzyme, putative</b>                   |                 |                                | prot_ID_37   | Afu8g00490        | AFUA_8G00490        |
| AFUA_8G00480        | -6             | 401           | phytanoyl-CoA dioxygenase family protein           |                 |                                | prot_ID_36   | Afu8g00480        | AFUA_8G00480        |
| AFUA_8G00470        | -7             | 397           | conserved hypothetical protein                     |                 |                                | prot_ID_35   | Afu8g00470        | AFUA_8G00470        |
| AFUA_8G00460        | -8             | 133           | methionine aminopeptidase, type I, putative        |                 |                                | prot_ID_34   | Afu8g00460        | AFUA_8G00460        |
| AFUA_8G00440        | -9             | 1948          | steroid monooxygenase, putative                    |                 |                                | prot_ID_33   | Afu8g00440        | AFUA_8G00440        |
| AFUA_8G00430        | -10            | 445           | conserved hypothetical protein                     |                 |                                | prot_ID_32   | Afu8g00430        | AFUA_8G00430        |
| AFUA_8G00420        | -11            | 176           | C6 finger transcription factor, putative           |                 |                                | prot_ID_31   | Afu8g00420        | AFUA_8G00420        |
| AFUA_8G00410        | -12            | 878           | methionine aminopeptidase, type II, putative       |                 |                                | prot_ID_30   | Afu8g00410        | AFUA_8G00410        |
| AFUA_8G00400        | -13            | 429           | conserved hypothetical protein                     |                 |                                | prot_ID_29   | Afu8g00400        | AFUA_8G00400        |
| AFUA_8G00390        | -14            | 87            | O-methyltransferase, putative                      |                 |                                | prot_ID_28   | Afu8g00390        | AFUA_8G00390        |

|              |     |     |                                |                                  |            |              |              |
|--------------|-----|-----|--------------------------------|----------------------------------|------------|--------------|--------------|
| AFUA_8G00380 | -15 | 197 | DltD N-terminal domain protein | prot_ID_27                       | Afu8g00380 | AFUA_8G00380 |              |
| AFUA_8G00370 | -16 | 483 | polyketide synthase, putative  | prot_ID_26                       | Afu8g00370 | AFUA_8G00370 |              |
| n/a          |     |     |                                | Protein of unknown function      | prot_ID_25 | Afu8g00360   | AFUA_8G00360 |
| n/a          |     |     |                                | Protein of unknown function      | prot_ID_24 | Afu8g00350   | AFUA_8G00350 |
| n/a          |     |     |                                | Endonuclease                     | prot_ID_23 | Afu8g00330   | AFUA_8G00330 |
| n/a          |     |     |                                | Protein of unknown function      | prot_ID_22 | Afu8g00320   | AFUA_8G00320 |
| n/a          |     |     |                                | Reverse transcriptase,<br>RNaseH | prot_ID_21 | Afu8g00310   | AFUA_8G00310 |

## Afu8g00620 cluster

No manual prediction made

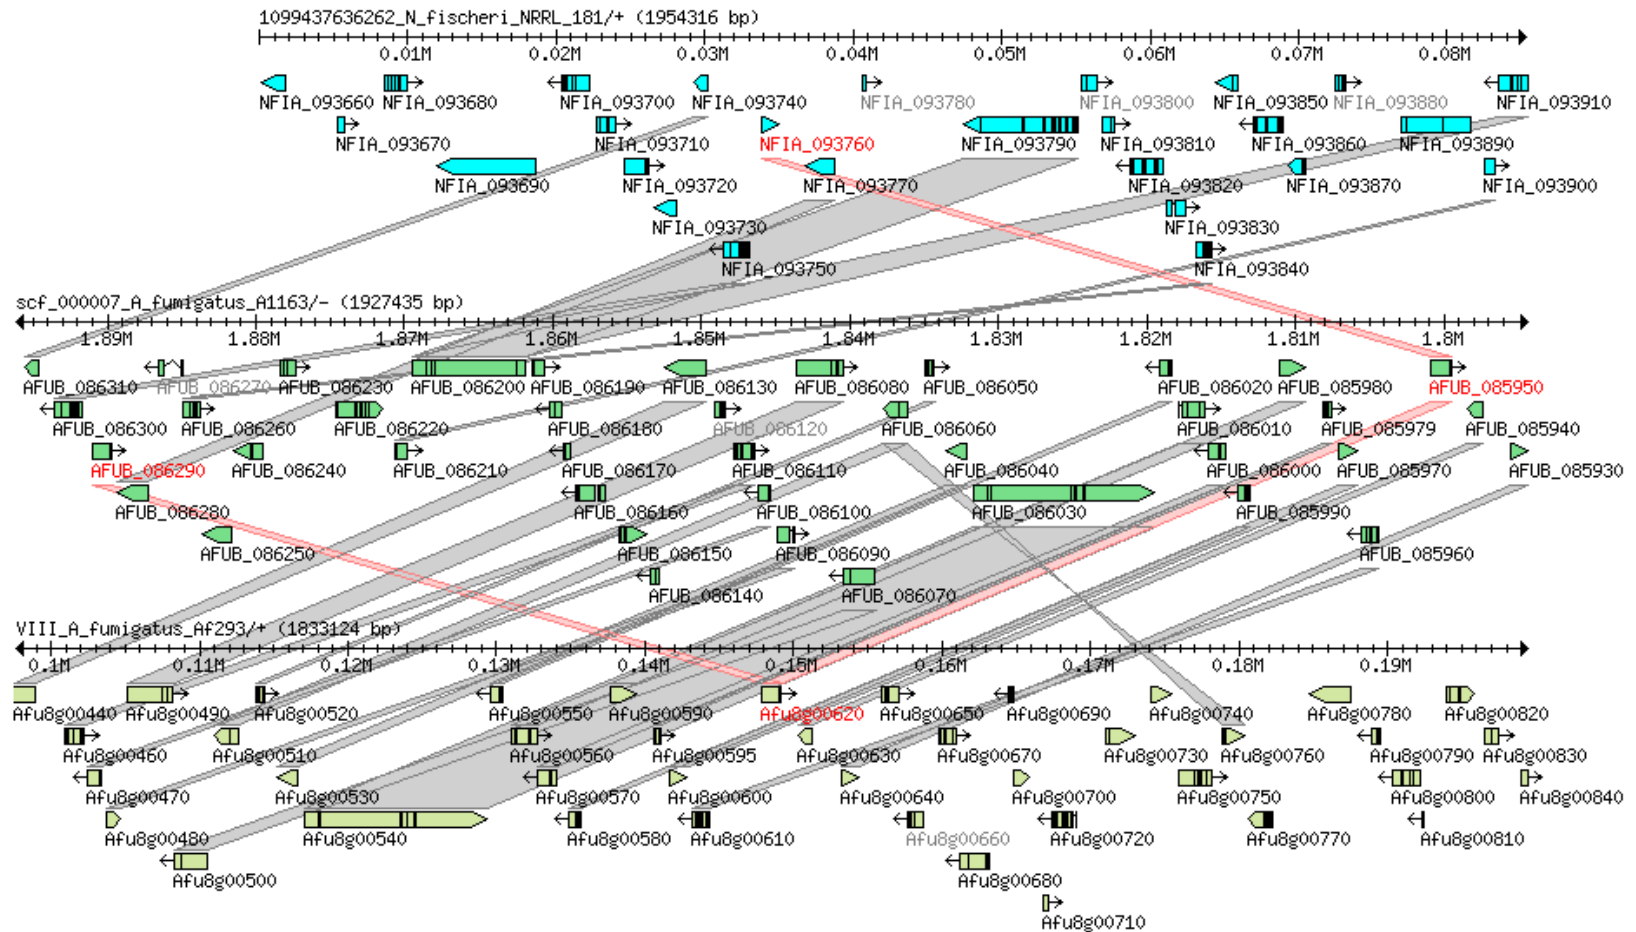

**Afu8g00620 cluster**

| Gene id (SMURF)     | Gene positions | Gene distance | Annotated_gene_function (SMURF)                    | AspGD gene name | AspGD supplementary annotation                                                   | antiSMASH ID      | Gene ID (I)       | Gene ID (II)        |
|---------------------|----------------|---------------|----------------------------------------------------|-----------------|----------------------------------------------------------------------------------|-------------------|-------------------|---------------------|
|                     |                |               |                                                    |                 | Putative amino acid transporter                                                  | prot_ID_60        | Afu8g00720        | AFUA_8G00720        |
|                     |                |               |                                                    |                 | Domain(s) with predicted role in defense response, negative regulation of growth | prot_ID_59        | Afu8g00710        | AFUA_8G00710        |
| n/a                 |                |               |                                                    |                 | class III chitinase                                                              | prot_ID_58        | Afu8g00700        | AFUA_8G00700        |
| n/a                 |                |               |                                                    |                 | Protein of unknown function                                                      | prot_ID_57        | Afu8g00690        | AFUA_8G00690        |
| n/a                 |                |               |                                                    |                 | Protein of unknown function                                                      | prot_ID_56        | Afu8g00680        | AFUA_8G00680        |
| n/a                 |                |               |                                                    |                 | Protein of unknown function                                                      | prot_ID_55        | Afu8g00670        | AFUA_8G00670        |
| n/a                 |                |               |                                                    |                 | Protein of unknown function                                                      | prot_ID_54        | Afu8g00660        | AFUA_8G00660        |
| n/a                 |                |               |                                                    |                 | Protein of unknown function                                                      | prot_ID_53        | Afu8g00650        | AFUA_8G00650        |
| AFUA_8G00640        | 2              | 1941          | glycosyl transferase, putative                     |                 | Protein of unknown function                                                      | prot_ID_52        | Afu8g00640        | AFUA_8G00640        |
| AFUA_8G00630        | 1              | 1008          | conserved hypothetical protein                     |                 | Protein of unknown function                                                      | prot_ID_51        | Afu8g00630        | AFUA_8G00630        |
| <b>AFUA_8G00620</b> | 0              | 0             | <b>dimethylallyl tryptophan synthase, putative</b> | <b>cdpNPT</b>   | <b>DMATS-type N-prenyltransferase</b>                                            | <b>prot_ID_50</b> | <b>Afu8g00620</b> | <b>AFUA_8G00620</b> |
| AFUA_8G00610        | -1             | 3538          | cell surface protein Mas1, putative                | mas1            |                                                                                  | prot_ID_49        | Afu8g00610        | AFUA_8G00610        |
| AFUA_8G00600        | -2             | 228           | NAD dependent epimerase/dehydratase family protein |                 | Protein of unknown function                                                      | prot_ID_48        | Afu8g00600        | AFUA_8G00600        |
| AFUA_8G00595        | -3             | 541           | Ham1 family pyrophosphatase, putative              |                 |                                                                                  | prot_ID_612       | Afu8g00595        | AFUA_8G00595        |
| AFUA_8G00590        | -4             | 1189          | fatty acid desaturase, putative                    |                 |                                                                                  | prot_ID_47        | Afu8g00590        | AFUA_8G00590        |
| AFUA_8G00580        | -5             | 2026          | glutathione S-transferase, putative                |                 |                                                                                  | prot_ID_46        | Afu8g00580        | AFUA_8G00580        |
| AFUA_8G00570        | -6             | 825           | alpha/beta hydrolase, putative                     |                 |                                                                                  | prot_ID_45        | Afu8g00570        | AFUA_8G00570        |
| AFUA_8G00560        | -7             | 89            | cytochrome P450 oxidoreductase, putative           |                 |                                                                                  | prot_ID_44        | Afu8g00560        | AFUA_8G00560        |
| AFUA_8G00550        | -8             | 539           | methyltransferase SirN-like, putative              |                 |                                                                                  | prot_ID_43        | Afu8g00550        | AFUA_8G00550        |
| AFUA_8G00540        | -9             | 235           | <b>hybrid PKS-NRPS enzyme, putative</b>            |                 |                                                                                  | <b>prot_ID_42</b> | <b>Afu8g00540</b> | <b>AFUA_8G00540</b> |
| AFUA_8G00530        | -10            | 463           | alpha/beta superfamily hydrolase                   |                 |                                                                                  | prot_ID_41        | Afu8g00530        | AFUA_8G00530        |
| AFUA_8G00520        | -11            | 780           | integral membrane protein                          |                 |                                                                                  | prot_ID_40        | Afu8g00520        | AFUA_8G00520        |
| AFUA_8G00510        | -12            | 1148          | cytochrome P450 oxidoreductase OrdA-like, putative |                 |                                                                                  | prot_ID_39        | Afu8g00510        | AFUA_8G00510        |
| AFUA_8G00500        | -13            | 409           | acetate-CoA ligase, putative                       |                 |                                                                                  | prot_ID_38        | Afu8g00500        | AFUA_8G00500        |



|              |     |     |                                             |
|--------------|-----|-----|---------------------------------------------|
| AFUA_8G00490 | -14 | 48  | PKS-like enzyme, putative                   |
| AFUA_8G00480 | -15 | 401 | phytanoyl-CoA dioxygenase<br>family protein |
| AFUA_8G00470 | -16 | 397 | conserved hypothetical protein              |
| n/a          |     |     |                                             |
| n/a          |     |     |                                             |
| n/a          |     |     |                                             |
| n/a          |     |     |                                             |
| n/a          |     |     |                                             |
| n/a          |     |     |                                             |
| n/a          |     |     |                                             |

|            |            |              |
|------------|------------|--------------|
| prot_ID_37 | Afu8g00490 | AFUA_8G00490 |
| prot_ID_36 | Afu8g00480 | AFUA_8G00480 |
| prot_ID_35 | Afu8g00470 | AFUA_8G00470 |
| prot_ID_34 | Afu8g00460 | AFUA_8G00460 |
| prot_ID_33 | Afu8g00440 | AFUA_8G00440 |
| prot_ID_32 | Afu8g00430 | AFUA_8G00430 |
| prot_ID_31 | Afu8g00420 | AFUA_8G00420 |
| prot_ID_30 | Afu8g00410 | AFUA_8G00410 |
| prot_ID_29 | Afu8g00400 | AFUA_8G00400 |
| prot_ID_28 | Afu8g00390 | AFUA_8G00390 |

# Afu8g01640 cluster

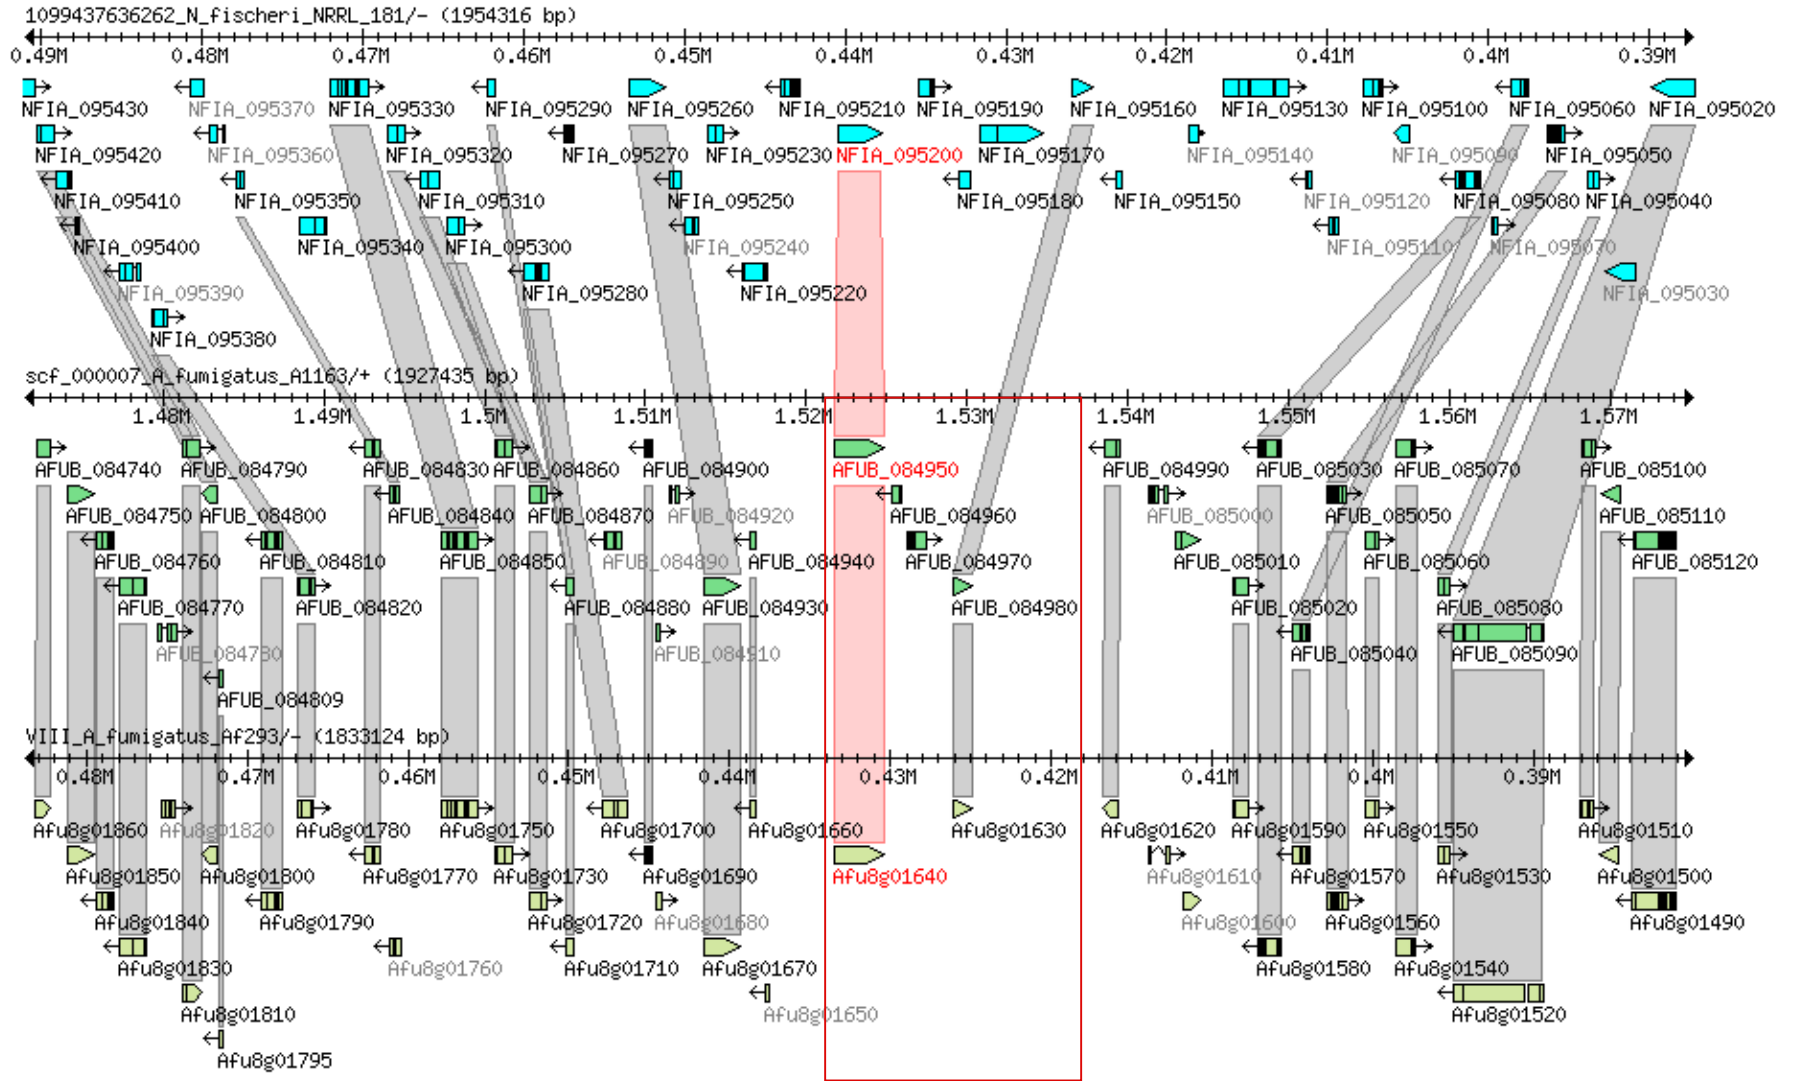

**Afu8g01640 cluster**

| Gene id (SMURF)     | Gene positions | Gene distance | Annotated_gene_function (SMURF) | AspGD gene name | AspGD supplementary annotation                      | antiSMASH ID       | Gene ID (I)       | Gene ID (II)        |          |
|---------------------|----------------|---------------|---------------------------------|-----------------|-----------------------------------------------------|--------------------|-------------------|---------------------|----------|
| n/a                 |                |               |                                 |                 | Protein of unknown function                         | prot_ID_143        | Afu8g01600        | AFUA_8G01600        |          |
| n/a                 |                |               |                                 |                 | Flavin adenine dinucleotide binding, oxidoreductase | prot_ID_146        | Afu8g01630        | AFUA_8G01630        | ECS, IGD |
| <b>AFUA_8G01640</b> | 0              | 0             | NRPS-like enzyme, putative      |                 | Nonribosomal peptide synthase                       | <b>prot_ID_147</b> | <b>Afu8g01640</b> | <b>AFUA_8G01640</b> | ECS, IGD |
| n/a                 |                |               |                                 |                 | Protein of unknown function                         | prot_ID_148        | Afu8g01650        | AFUA_8G01650        |          |
| n/a                 |                |               |                                 |                 | Protein of unknown function                         | prot_ID_149        | Afu8g01660        | AFUA_8G01660        |          |
| n/a                 |                |               |                                 |                 | bifunctional catalase-peroxidase                    | prot_ID_150        | Afu8g01670        | AFUA_8G01670        |          |
| n/a                 |                |               |                                 |                 | Protein of unknown function                         | prot_ID_151        | Afu8g01680        | AFUA_8G01680        |          |
| n/a                 |                |               |                                 |                 | Protein of unknown function                         | prot_ID_152        | Afu8g01690        | AFUA_8G01690        |          |
| n/a                 |                |               |                                 |                 | Haloalkane dehalogenase family protein              | prot_ID_153        | Afu8g01700        | AFUA_8G01700        |          |
| n/a                 |                |               |                                 |                 |                                                     | prot_ID_154        | Afu8g01710        | AFUA_8G01710        |          |
| n/a                 |                |               |                                 |                 |                                                     | prot_ID_155        | Afu8g01720        | AFUA_8G01720        |          |
| n/a                 |                |               |                                 |                 |                                                     | prot_ID_156        | Afu8g01730        | AFUA_8G01730        |          |

## Afu8g02350 cluster

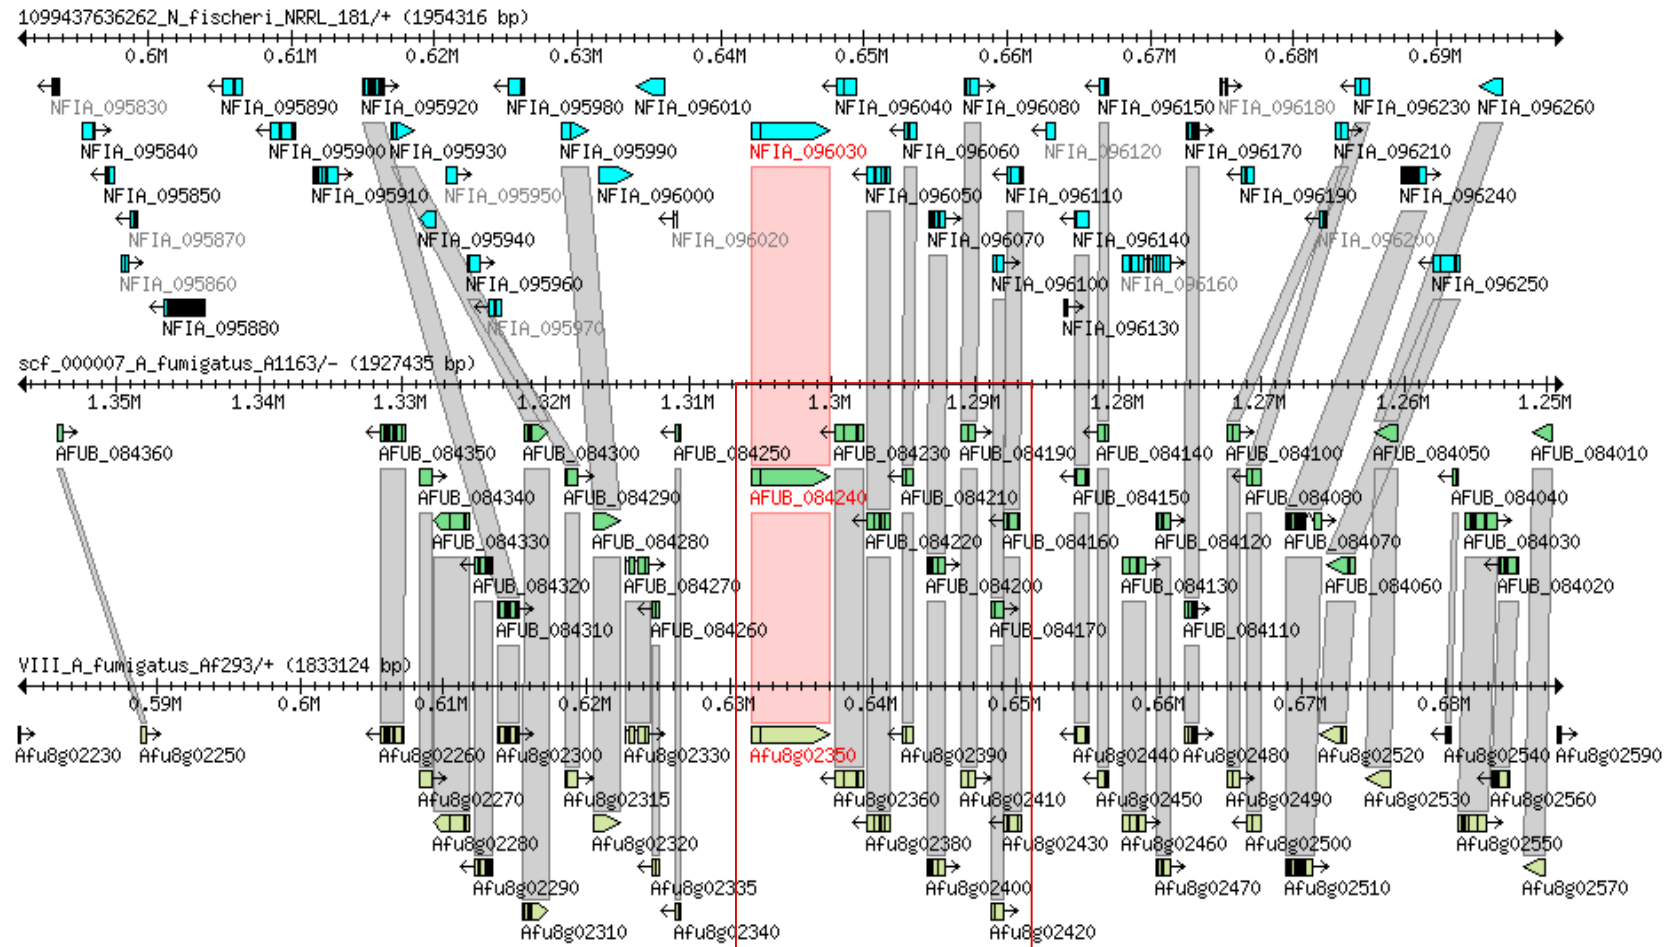

**Afu8g02350 cluster**

| Gene id (SMURF)     | Gene positions | Gene distance | Annotated_gene_function (SMURF)                        | AspGD gene name | AspGD supplementary annotation             | antiSMASH ID       | Gene ID (I)       | Gene ID (II)        |
|---------------------|----------------|---------------|--------------------------------------------------------|-----------------|--------------------------------------------|--------------------|-------------------|---------------------|
| n/a                 |                |               |                                                        |                 |                                            | prot_ID_227        | Afu8g02490        | AFUA_8G02490        |
| n/a                 |                |               |                                                        |                 |                                            | prot_ID_226        | Afu8g02480        | AFUA_8G02480        |
| n/a                 |                |               |                                                        |                 |                                            | prot_ID_225        | Afu8g02470        | AFUA_8G02470        |
| AFUA_8G02460        | 10             | 1004          | MFS transporter, putative                              |                 |                                            | prot_ID_224        | Afu8g02460        | AFUA_8G02460        |
| AFUA_8G02450        | 9              | 661           | conserved hypothetical protein                         |                 |                                            | prot_ID_223        | Afu8g02450        | AFUA_8G02450        |
| AFUA_8G02440        | 8              | 3763          | C-4 methyl sterol oxidase, putative                    |                 |                                            | prot_ID_222        | Afu8g02440        | AFUA_8G02440        |
| AFUA_8G02430        | 7              | 44            | zinc-binding alcohol dehydrogenase, putative           |                 |                                            | prot_ID_221        | Afu8g02430        | AFUA_8G02430        |
| AFUA_8G02420        | 6              | 911           | conserved hypothetical protein                         |                 |                                            | prot_ID_220        | Afu8g02420        | AFUA_8G02420        |
| AFUA_8G02410        | 5              | 1209          | UbiA prenyltransferase family protein                  |                 |                                            | prot_ID_219        | Afu8g02410        | AFUA_8G02410        |
| AFUA_8G02400        | 4              | 899           | geranylgeranyl pyrophosphate synthetase AtmG, putative |                 |                                            | prot_ID_218        | Afu8g02400        | AFUA_8G02400        |
| AFUA_8G02390        | 3              | 897           | conserved hypothetical protein                         |                 |                                            | prot_ID_217        | Afu8g02390        | AFUA_8G02390        |
| AFUA_8G02380        | 2              | 220           | FAD-dependent monooxygenase, putative                  |                 |                                            | prot_ID_216        | Afu8g02380        | AFUA_8G02380        |
| AFUA_8G02360        | 1              | 357           | TRI7-like toxin biosynthesis protein, putative         |                 |                                            | prot_ID_215        | Afu8g02360        | AFUA_8G02360        |
| <b>AFUA_8G02350</b> | 0              | 0             | polyketide synthase, putative                          |                 | Polyketide synthase                        | <b>prot_ID_214</b> | <b>Afu8g02350</b> | <b>AFUA_8G02350</b> |
| n/a                 |                |               |                                                        |                 | Protein of unknown function                | prot_ID_213        | Afu8g02340        | AFUA_8G02340        |
| n/a                 |                |               |                                                        |                 | Protein of unknown function                | prot_ID_609        | Afu8g02335        | AFUA_8G02335        |
| n/a                 |                |               |                                                        |                 | Protein of unknown function                | prot_ID_212        | Afu8g02330        | AFUA_8G02330        |
| n/a                 |                |               |                                                        |                 | Protein of unknown function                | prot_ID_211        | Afu8g02320        | AFUA_8G02320        |
| n/a                 |                |               |                                                        |                 | Protein of unknown function                | prot_ID_602        | Afu8g02315        | AFUA_8G02315        |
| n/a                 |                |               |                                                        |                 | Oxidoreductase FMN binding, oxidoreductase | prot_ID_210        | Afu8g02310        | AFUA_8G02310        |
| n/a                 |                |               |                                                        |                 | Protein of unknown function                | prot_ID_209        | Afu8g02300        | AFUA_8G02300        |
| n/a                 |                |               |                                                        |                 | Protein of unknown function                | prot_ID_208        | Afu8g02290        | AFUA_8G02290        |
| n/a                 |                |               |                                                        |                 | Transcription cofactor                     | prot_ID_207        | Afu8g02280        | AFUA_8G02280        |

ECS, IGD

ECS, IGD

**No PKS or NRPS backbone 1**  
No manual prediction made

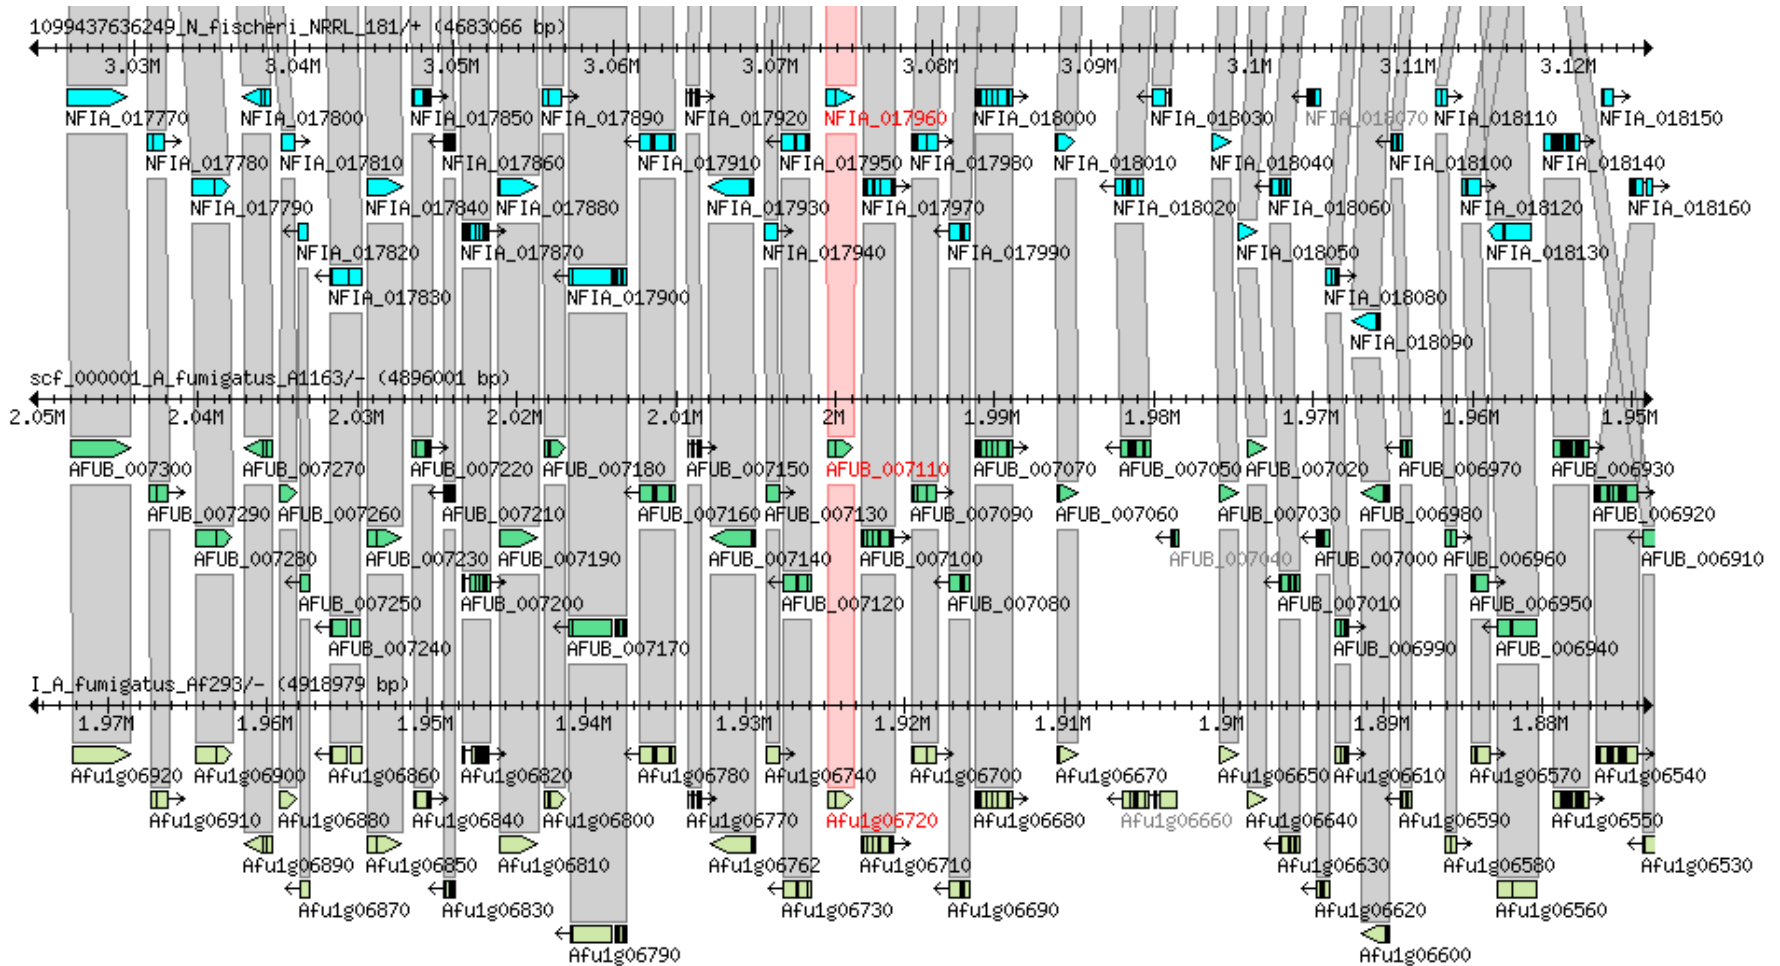

**No PKS or NRPS backbone 1**

| Gene id (SMURF) | Gene positions | Gene distance | Annotated_gene_function (SMURF) | AspGD gene name | AspGD supplementary annotation                                                                       | antiSMASH ID | Gene ID (I) | Gene ID (II) |
|-----------------|----------------|---------------|---------------------------------|-----------------|------------------------------------------------------------------------------------------------------|--------------|-------------|--------------|
| n/a             |                |               |                                 |                 | Ortholog(s) have role in maturation of SSU-rRNA                                                      | prot_ID_625  | Afu1g06690  | AFUA_1G06690 |
| n/a             |                |               |                                 | casA            | Predicted metacaspase, an aspartate-specific cysteine protease                                       | prot_ID_626  | Afu1g06700  | AFUA_1G06700 |
| n/a             |                |               |                                 |                 | t-complex protein 1, eta subunit                                                                     | prot_ID_627  | Afu1g06710  | AFUA_1G06710 |
| n/a             |                |               |                                 |                 | Histone acetyltransferase                                                                            | prot_ID_628  | Afu1g06720  | AFUA_1G06720 |
| n/a             |                |               |                                 |                 | Protein of unknown function Domain(s) with predicted nucleic acid binding, zinc ion binding activity | prot_ID_629  | Afu1g06730  | AFUA_1G06730 |
| n/a             |                |               |                                 |                 | Protein of unknown function                                                                          | prot_ID_630  | Afu1g06740  | AFUA_1G06740 |
| n/a             |                |               |                                 |                 | Protein of unknown function                                                                          | prot_ID_1626 | Afu1g06762  | AFUA_1G06762 |
| n/a             |                |               |                                 |                 | 40S ribosomal protein S26                                                                            | prot_ID_631  | Afu1g06770  | AFUA_1G06770 |
| n/a             |                |               |                                 |                 | CBS and PB1 domain protein                                                                           | prot_ID_632  | Afu1g06780  | AFUA_1G06780 |
| n/a             |                |               |                                 |                 | Importin beta-3 subunit                                                                              | prot_ID_633  | Afu1g06790  | AFUA_1G06790 |

## No PKS or NRPS backbone 2

No manual prediction made

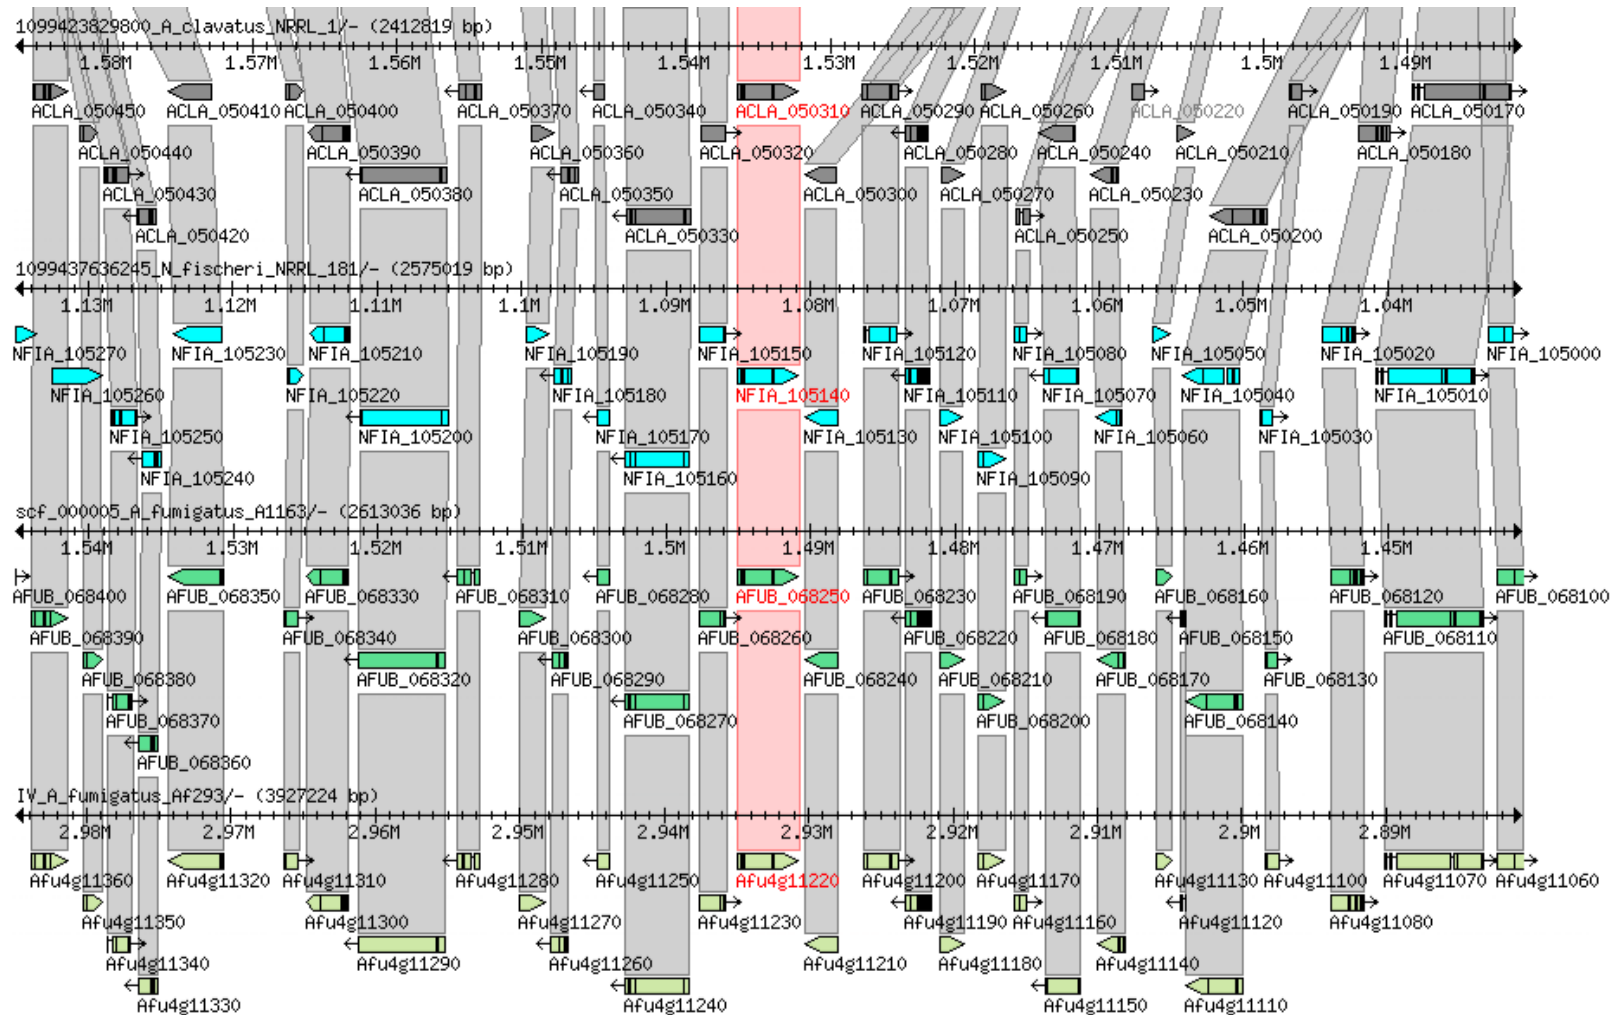



**No PKS or NRPS backbone 2**

| Gene id (SMURF) | Gene positions | Gene distance | Annotated_gene_function (SMURF) | AspGD gene name | AspGD supplementary annotation                                                                                                     | antiSMASH ID | Gene ID (I) | Gene ID (II) |
|-----------------|----------------|---------------|---------------------------------|-----------------|------------------------------------------------------------------------------------------------------------------------------------|--------------|-------------|--------------|
| n/a             |                |               |                                 |                 | Protein of unknown function                                                                                                        | prot_ID_854  | Afu4g11170  | AFUA_4G11170 |
| n/a             |                |               |                                 |                 | AAA family ATPase                                                                                                                  | prot_ID_855  | Afu4g11180  | AFUA_4G11180 |
| n/a             |                |               |                                 |                 | Kynurenine aminotransferase                                                                                                        | prot_ID_856  | Afu4g11190  | AFUA_4G11190 |
| n/a             |                |               |                                 |                 | Protein of unknown function                                                                                                        | prot_ID_857  | Afu4g11200  | AFUA_4G11200 |
| n/a             |                |               |                                 |                 | Ortholog(s) have role in plasma membrane fusion involved in cytogamy, response to pheromone and mating projection tip localization | prot_ID_858  | Afu4g11210  | AFUA_4G11210 |
| n/a             |                |               |                                 |                 | Ortholog(s) have xanthine dehydrogenase activity and role in purine nucleobase catabolic process                                   | prot_ID_859  | Afu4g11220  | AFUA_4G11220 |
| n/a             |                |               |                                 |                 | Protein of unknown function                                                                                                        | prot_ID_860  | Afu4g11230  | AFUA_4G11230 |
| n/a             |                |               |                                 | aarA            | Alpha-aminoadipate reductase, large subunit                                                                                        | prot_ID_861  | Afu4g11240  | AFUA_4G11240 |
| n/a             |                |               |                                 | cafA            | Carbonic anhydrase                                                                                                                 | prot_ID_862  | Afu4g11250  | AFUA_4G11250 |
| n/a             |                |               |                                 |                 | Oxidoreductase                                                                                                                     | prot_ID_863  | Afu4g11260  | AFUA_4G11260 |
| n/a             |                |               |                                 |                 | Protein of unknown function                                                                                                        | prot_ID_864  | Afu4g11270  | AFUA_4G11270 |
| n/a             |                |               |                                 |                 | Dolichyl-phosphate-mannose-glycolipid alpha-mannosyltransferase                                                                    | prot_ID_865  | Afu4g11280  | AFUA_4G11280 |
| n/a             |                |               |                                 |                 | Peptidase activator activity                                                                                                       | prot_ID_866  | Afu4g11290  | AFUA_4G11290 |
| n/a             |                |               |                                 |                 | Vacuolar ATPase 98 kDa subunit                                                                                                     | prot_ID_867  | Afu4g11300  | AFUA_4G11300 |

**No PKS or NRPS backbone 3**  
No manual prediction made

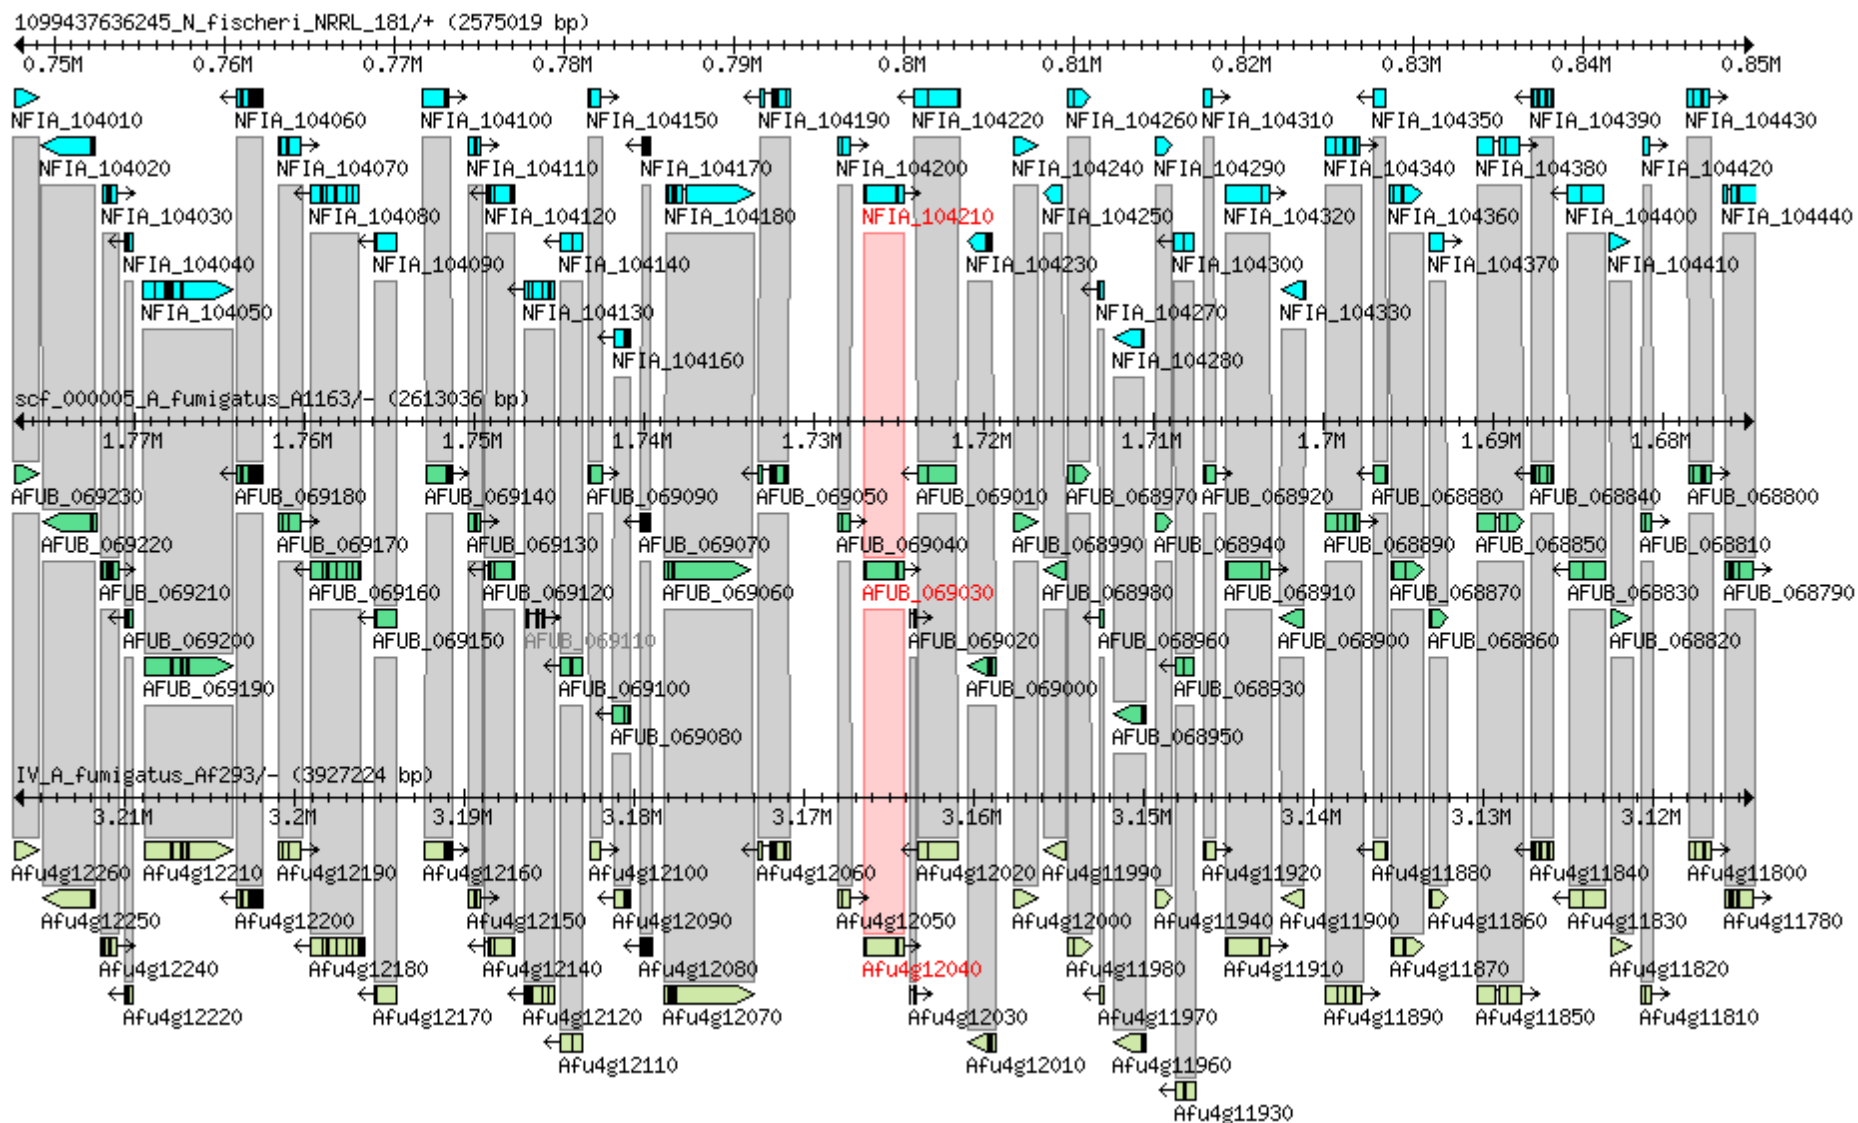

**No PKS or NRPS backbone 3**

| Gene id (SMURF) | Gene positions | Gene distance | Annotated_gene_function (SMURF) | AspGD gene name | AspGD supplementary annotation                              | antiSMASH ID | Gene ID (I) | Gene ID (II) |
|-----------------|----------------|---------------|---------------------------------|-----------------|-------------------------------------------------------------|--------------|-------------|--------------|
| n/a             |                |               |                                 |                 | Anthranilate phosphoribosyl transferase                     | prot_ID_928  | Afu4g11980  | AFUA_4G11980 |
| n/a             |                |               |                                 |                 | Protein of unknown function                                 | prot_ID_929  | Afu4g11990  | AFUA_4G11990 |
| n/a             |                |               |                                 |                 | Phosphatidylinositol phospholipase C                        | prot_ID_930  | Afu4g12000  | AFUA_4G12000 |
| n/a             |                |               |                                 |                 | 2-oxo acid dehydrogenases acyltransferase                   | prot_ID_931  | Afu4g12010  | AFUA_4G12010 |
| n/a             |                |               |                                 |                 | Protein of unknown function                                 | prot_ID_932  | Afu4g12020  | AFUA_4G12020 |
| n/a             |                |               |                                 |                 | Protein of unknown function                                 | prot_ID_933  | Afu4g12030  | AFUA_4G12030 |
| n/a             |                |               |                                 | erg7B           | oxidosqualene:lanosterol cyclase                            | prot_ID_934  | Afu4g12040  | AFUA_4G12040 |
| n/a             |                |               |                                 |                 | Thermoresistant gluconokinase                               | prot_ID_935  | Afu4g12050  | AFUA_4G12050 |
| n/a             |                |               |                                 |                 | Vacuolar protein sorting-associated protein 26              | prot_ID_936  | Afu4g12060  | AFUA_4G12060 |
| n/a             |                |               |                                 |                 | Ortholog(s) have guanylnucleotide exchange factor activity, | prot_ID_937  | Afu4g12070  | AFUA_4G12070 |

# No PKS or NRPS backbone 4

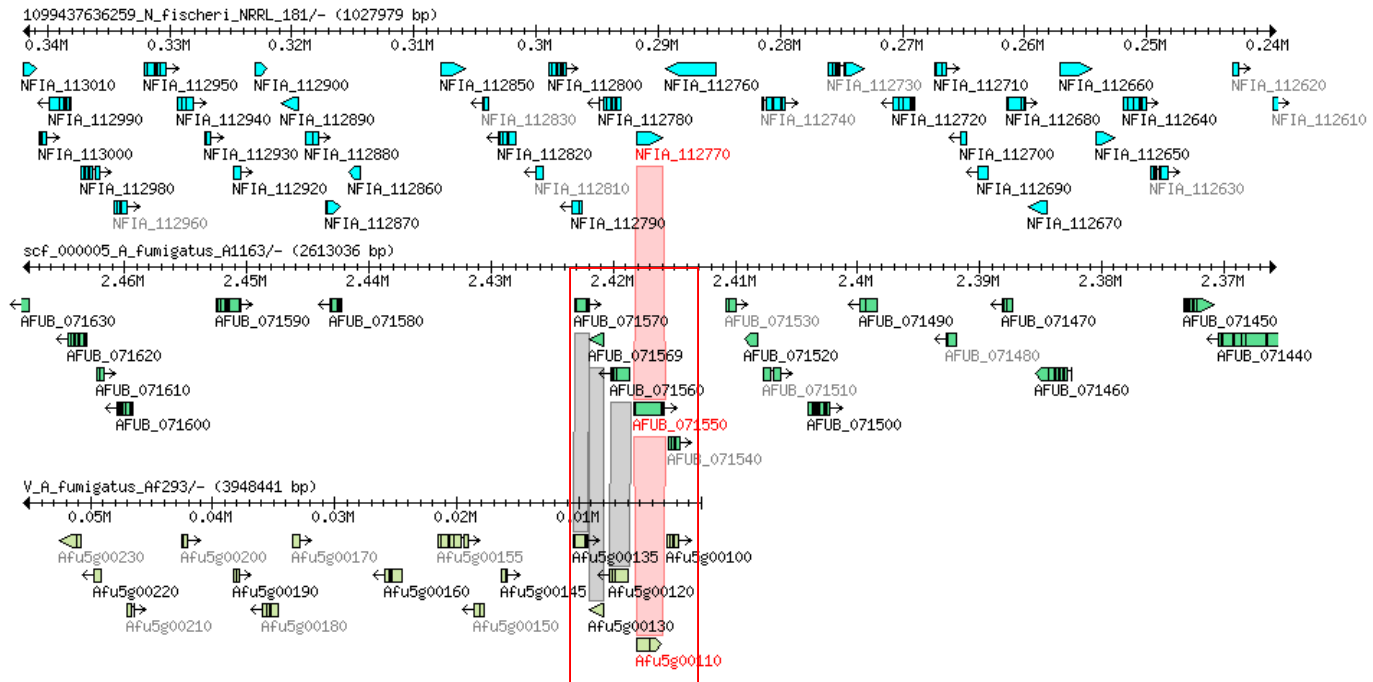

**No PKS or NRPS backbone 4**

| Gene id (SMURF) | Gene positions | Gene distance | Annotated_gene_function (SMURF) | AspGD gene name | AspGD supplementary annotation                                                            | antiSMASH ID | Gene ID (I) | Gene ID (II) |          |
|-----------------|----------------|---------------|---------------------------------|-----------------|-------------------------------------------------------------------------------------------|--------------|-------------|--------------|----------|
| n/a             |                |               |                                 |                 | Protein of unknown function                                                               | prot_ID_1    | Afu5g00100  | AFUA_5G00100 | ECS, IGD |
| n/a             |                |               |                                 |                 | Putative squalene-hopene-cyclase                                                          | prot_ID_2    | Afu5g00110  | AFUA_5G00110 |          |
| n/a             |                |               |                                 |                 | Cytochrome P450 oxidoreductase/alkane hydroxylase                                         | prot_ID_3    | Afu5g00120  | AFUA_5G00120 |          |
| n/a             |                |               |                                 |                 | Capsule polysaccharide biosynthesis protein                                               | prot_ID_4    | Afu5g00130  | AFUA_5G00130 |          |
| n/a             |                |               |                                 |                 | Putative transcription factor                                                             | prot_ID_1344 | Afu5g00135  | AFUA_5G00135 | ECS, IGD |
| n/a             |                |               |                                 |                 | DNA damage repair protein (Rad9)                                                          | prot_ID_375  | Afu5g04020  | AFUA_5G04020 |          |
| n/a             |                |               |                                 |                 | Domain(s) with predicted structural constituent of ribosome activity, role in translation | prot_ID_376  | Afu5g04030  | AFUA_5G04030 |          |
| n/a             |                |               |                                 |                 | Protein of unknown function                                                               | prot_ID_377  | Afu5g04040  | AFUA_5G04040 |          |
| n/a             |                |               |                                 |                 | Scramblase family protein                                                                 | prot_ID_378  | Afu5g04050  | AFUA_5G04050 |          |
| n/a             |                |               |                                 |                 | Ubiquitin-protein ligase                                                                  | prot_ID_379  | Afu5g04060  | AFUA_5G04060 |          |
| n/a             |                |               |                                 |                 | Protein with similarity to Spo11                                                          | prot_ID_380  | Afu5g04070  | AFUA_5G04070 |          |
| n/a             |                |               |                                 |                 | Oxidosqualene:lanosterol cyclase                                                          | prot_ID_381  | Afu5g04080  | AFUA_5G04080 |          |
| n/a             |                |               |                                 |                 | SGT1 and CS domain protein                                                                | prot_ID_382  | Afu5g04090  | AFUA_5G04090 |          |
| n/a             |                |               |                                 | gprF            | G-protein coupled receptor                                                                | prot_ID_383  | Afu5g04100  | AFUA_5G04100 |          |
| n/a             |                |               |                                 |                 | DDE1 transposon-related ORF                                                               | prot_ID_384  | Afu5g04110  | AFUA_5G04110 |          |
| n/a             |                |               |                                 |                 | Hydrolase                                                                                 | prot_ID_385  | Afu5g04120  | AFUA_5G04120 |          |
| n/a             |                |               |                                 |                 | Cyclin-dependent protein kinase                                                           | prot_ID_386  | Afu5g04130  | AFUA_5G04130 |          |

## No PKS or NRPS backbone 5

Possible cluster based on interspecies synteny indicated

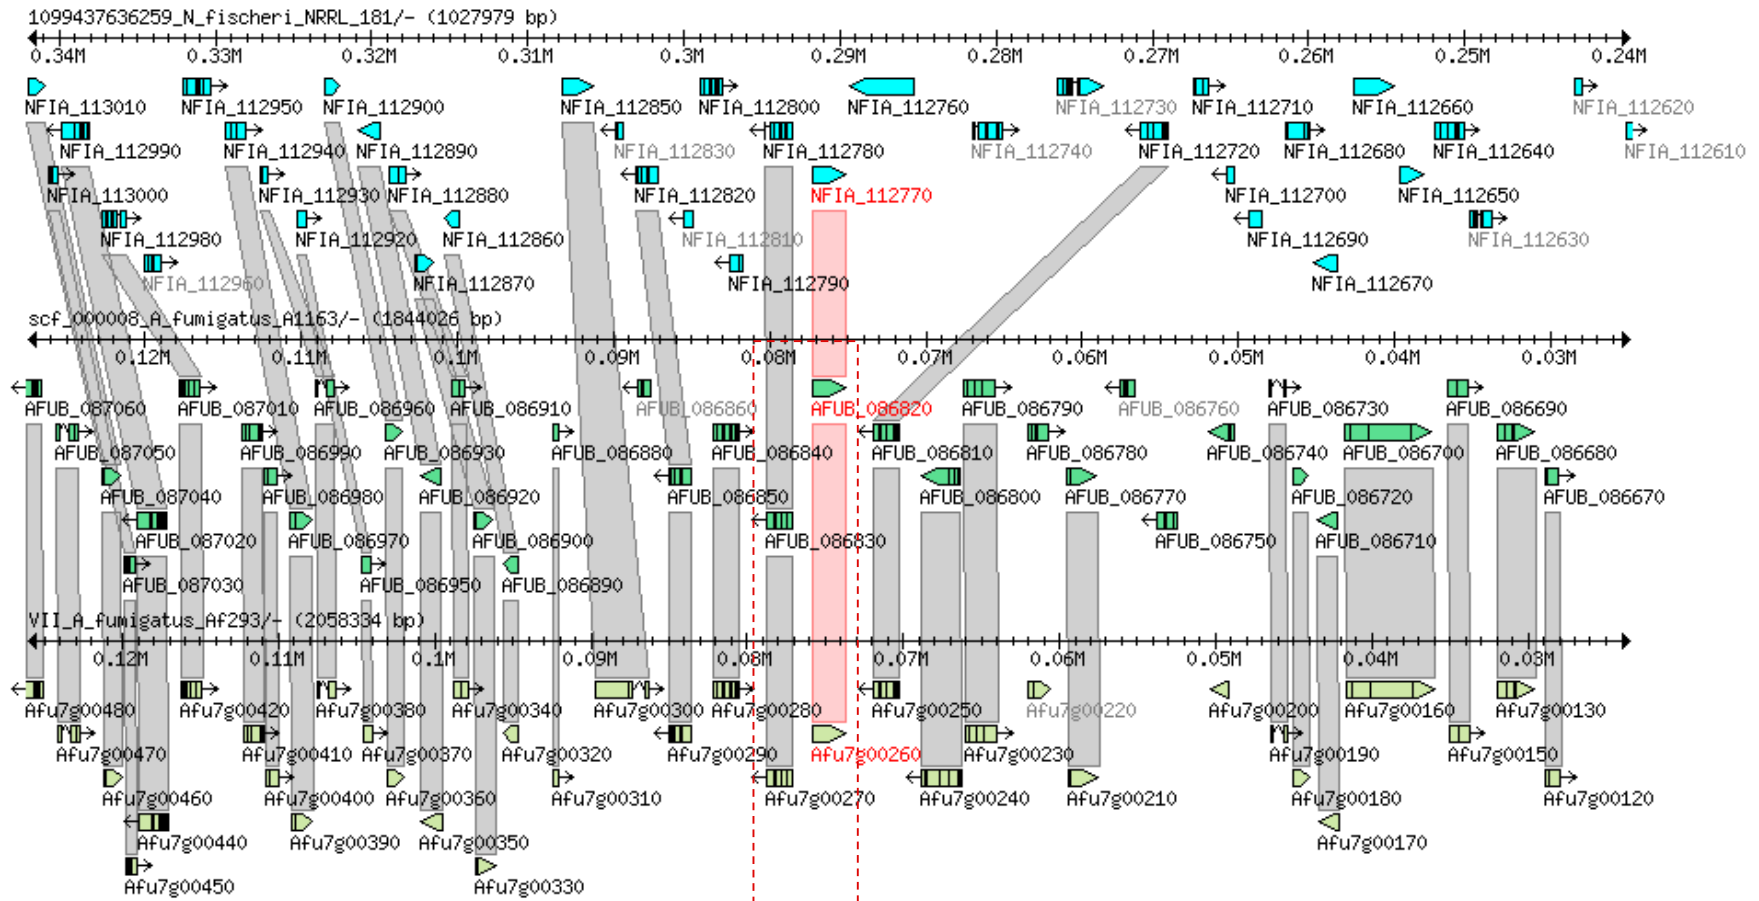

**No PKS or NRPS backbone 5**

| Gene id (SMURF) | Gene positions | Gene distance | Annotated_gene_function (SMURF) | AspGD gene name | AspGD supplementary annotation                                                                         | antiSMASH ID | Gene ID (I) | Gene ID (II) |         |
|-----------------|----------------|---------------|---------------------------------|-----------------|--------------------------------------------------------------------------------------------------------|--------------|-------------|--------------|---------|
| n/a             |                |               |                                 |                 | Transmembrane transporter                                                                              | prot_ID_14   | Afu7g00230  | AFUA_7G00230 |         |
| n/a             |                |               |                                 |                 | Hydrolase                                                                                              | prot_ID_15   | Afu7g00240  | AFUA_7G00240 |         |
| n/a             |                |               |                                 | tub2            | Tubulin beta-2 subunit                                                                                 | prot_ID_16   | Afu7g00250  | AFUA_7G00250 |         |
| n/a             |                |               |                                 |                 | Domain(s) with predicted intramolecular transferase activity and role in hopanoid biosynthetic process | prot_ID_17   | Afu7g00260  | AFUA_7G00260 | ECS, FA |
| n/a             |                |               |                                 |                 | Protein of unknown function                                                                            | prot_ID_18   | Afu7g00270  | AFUA_7G00270 | ECS     |
| n/a             |                |               |                                 |                 | Transmembrane transporter                                                                              | prot_ID_19   | Afu7g00280  | AFUA_7G00280 |         |
| n/a             |                |               |                                 |                 | Protein of unknown function                                                                            | prot_ID_20   | Afu7g00290  | AFUA_7G00290 |         |
| n/a             |                |               |                                 |                 | Protein of unknown function                                                                            | prot_ID_21   | Afu7g00300  | AFUA_7G00300 |         |
| n/a             |                |               |                                 |                 | Protein of unknown function                                                                            | prot_ID_22   | Afu7g00310  | AFUA_7G00310 |         |
| n/a             |                |               |                                 |                 | Protein of unknown function                                                                            | prot_ID_23   | Afu7g00320  | AFUA_7G00320 |         |
| n/a             |                |               |                                 |                 | Protein of unknown function                                                                            | prot_ID_24   | Afu7g00330  | AFUA_7G00330 |         |
| n/a             |                |               |                                 |                 | Hydrolase                                                                                              | prot_ID_25   | Afu7g00340  | AFUA_7G00340 |         |
| n/a             |                |               |                                 |                 | NAD-dependent dehydrogenase                                                                            | prot_ID_26   | Afu7g00350  | AFUA_7G00350 |         |

# No PKS or NRPS backbone 6

Possible cluster based on interspecies synteny indicated

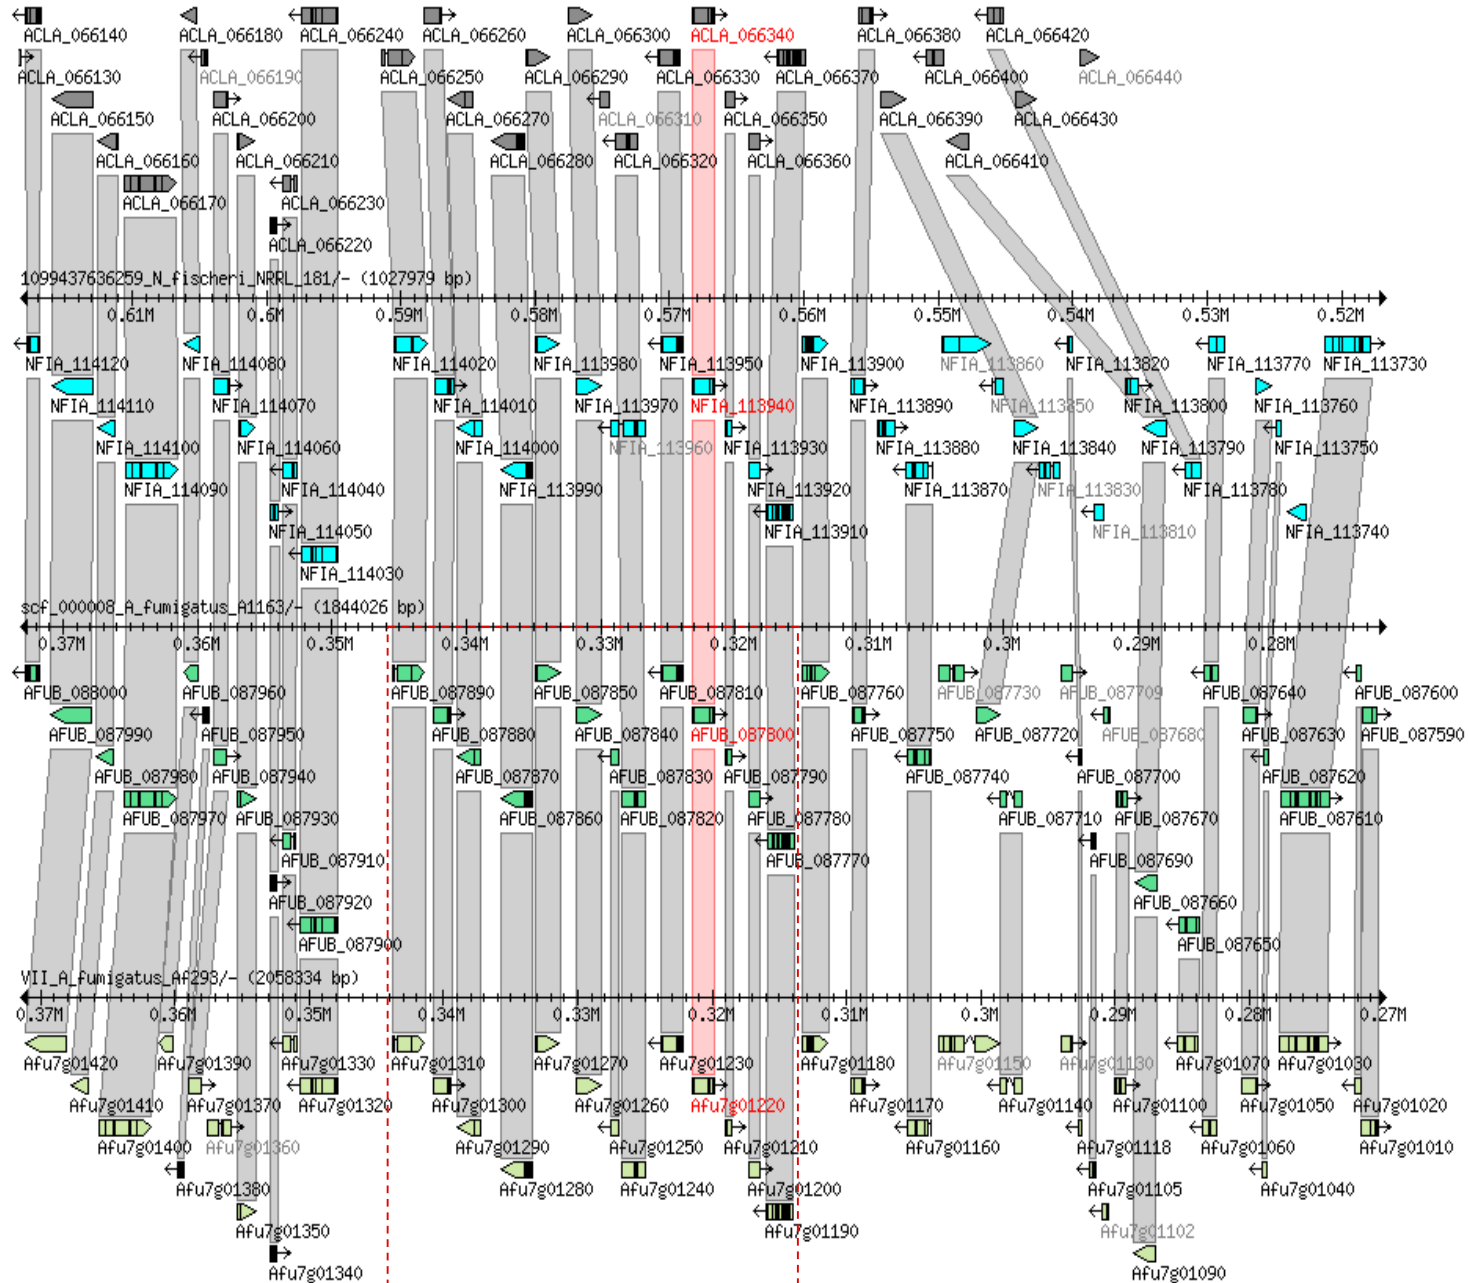



**No PKS or NRPS backbone 6**

| Gene id (SMURF) | Gene positions | Gene distance | Annotated_gene_function (SMURF) | AspGD gene name | AspGD supplementary annotation                                                                                     | antiSMASH ID | Gene ID (I) | Gene ID (II) |     |
|-----------------|----------------|---------------|---------------------------------|-----------------|--------------------------------------------------------------------------------------------------------------------|--------------|-------------|--------------|-----|
| n/a             |                |               |                                 |                 | Protein of unknown function                                                                                        | prot_ID_100  | Afu7g01180  | AFUA_7G01180 |     |
| n/a             |                |               |                                 |                 | Transmembrane transporter                                                                                          | prot_ID_101  | Afu7g01190  | AFUA_7G01190 | ECS |
| n/a             |                |               |                                 |                 | Aspergillopepsin                                                                                                   | prot_ID_102  | Afu7g01200  | AFUA_7G01200 |     |
| n/a             |                |               |                                 |                 | Protein of unknown function                                                                                        | prot_ID_103  | Afu7g01210  | AFUA_7G01210 |     |
| n/a             |                |               |                                 | erg9            | squalene synthetase                                                                                                | prot_ID_104  | Afu7g01220  | AFUA_7G01220 |     |
| n/a             |                |               |                                 |                 | Domain(s) with predicted heat shock protein binding                                                                | prot_ID_105  | Afu7g01230  | AFUA_7G01230 |     |
| n/a             |                |               |                                 |                 | Domain(s) with predicted acid phosphatase activity                                                                 | prot_ID_106  | Afu7g01240  | AFUA_7G01240 |     |
| n/a             |                |               |                                 |                 | Protein of unknown function                                                                                        | prot_ID_107  | Afu7g01250  | AFUA_7G01250 |     |
| n/a             |                |               |                                 |                 | Protein of unknown function                                                                                        | prot_ID_108  | Afu7g01260  | AFUA_7G01260 |     |
| n/a             |                |               |                                 |                 | Domain(s) with predicted DNA-directed DNA polymerase activity, damaged DNA binding activity and role in DNA repair | prot_ID_109  | Afu7g01270  | AFUA_7G01270 |     |
|                 |                |               |                                 |                 | camptothecin resistance conferring protein rcaA                                                                    | n/a          | Afu7g01280  | AFUA_7G01280 |     |
|                 |                |               |                                 |                 | Protein of unknown function                                                                                        | n/a          | Afu7g01290  | AFUA_7G01290 |     |
|                 |                |               |                                 |                 | GPI anchor biosynthesis protein                                                                                    | n/a          | Afu7g01300  | AFUA_7G01300 |     |
|                 |                |               |                                 |                 | C6 transcription factor                                                                                            | n/a          | Afu7g01310  | AFUA_7G01310 | IGD |

Abbreviations: ECS, end of cluster syntenly; IGD, increase in intergenic distance; FA, change in functional annotation; ED, experimentally determined
