# Supplementary material for: Comprehensive annotation of secondary metabolite biosynthetic genes and gene clusters of Aspergillus nidulans, A. fumigatus, A. niger and A. oryzae
Source: PubMed Central journal article supplement (PMC3689640; doi:10.1186/1471-2180-13-91), 2013-04-26
Supplement: 1471-2180-13-91-S4.pdf [file 1471-2180-13-91-S4.pdf]

## **Additional file 4**

**Comprehensive annotation of secondary metabolite biosynthetic genes and gene clusters of *Aspergillus nidulans*, *A. fumigatus*, *A. niger* and *A. oryzae***

Diane O. Inglis, Jon Binkley, Marek Skrzypek, Martha B. Arnaud, Gustavo Cerqueira, Prach Shah, Farrell Wymore, Jennifer R. Wortman and Gavin Sherlock

Abbreviations: ECS, end of cluster synteny; IGD, increase in intergenic distance; FA, change in functional annotation; ED, experimentally determined

## An01g01130 cluster

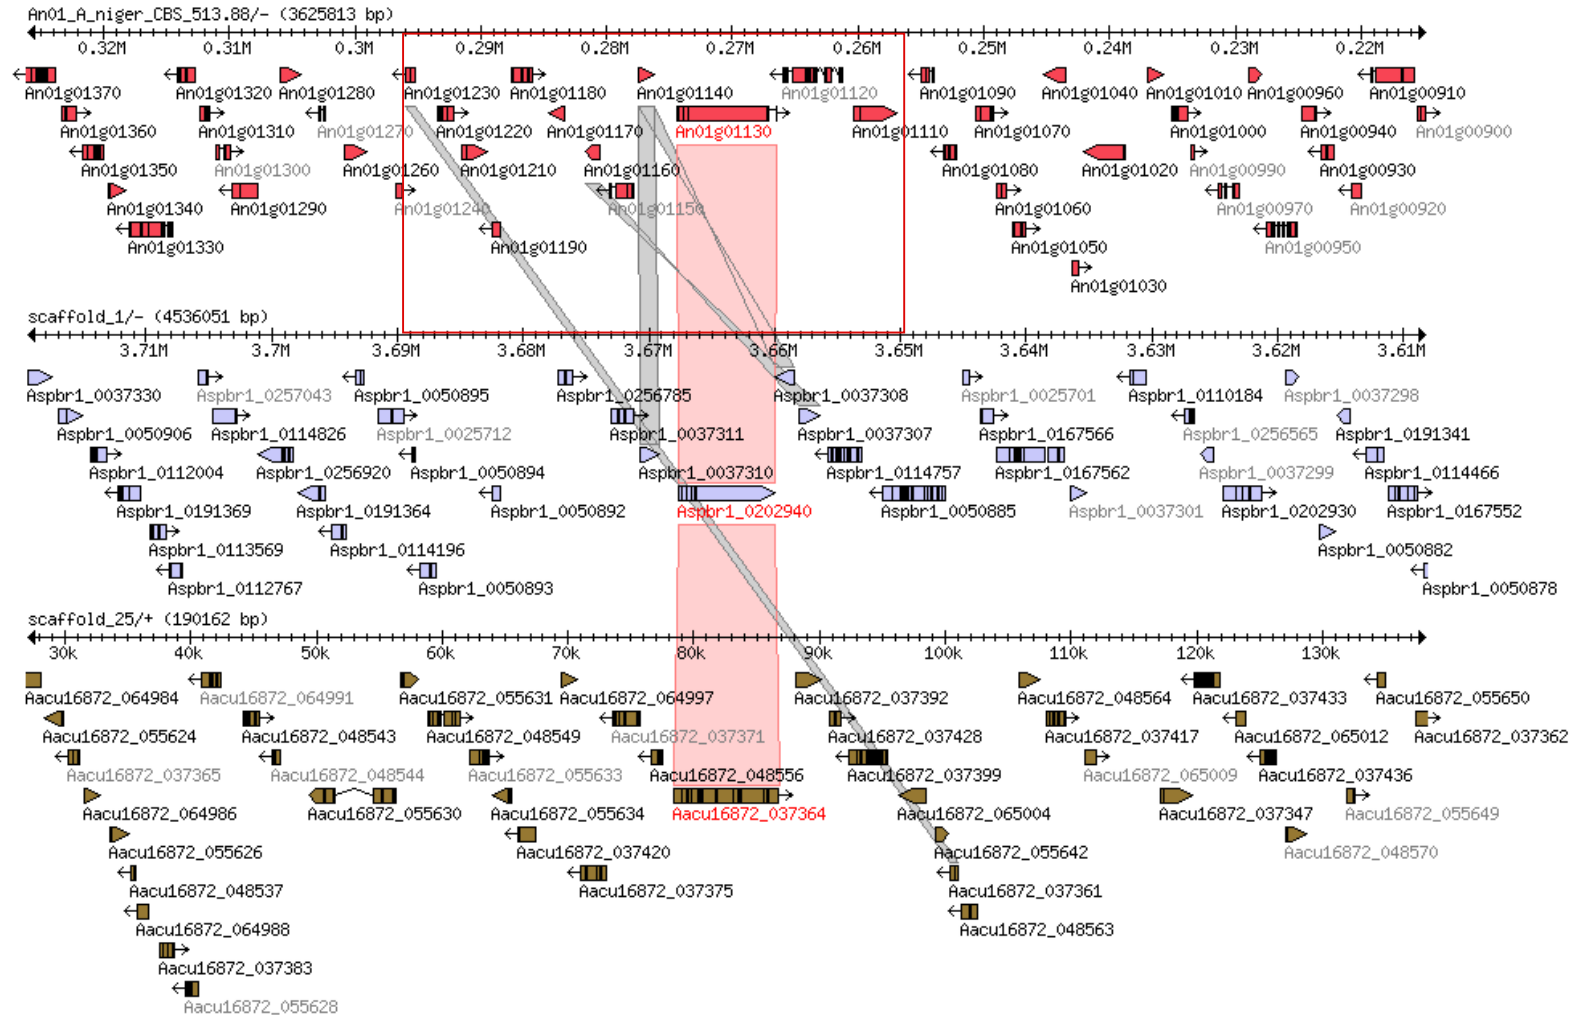

**An01g01130 cluster**

| Gene id (SMURF)   | Gene positions | Gene distance | AspGD name | AspGD description line or supplemental annotation                                                                                                                                                                       | protein ID (antiSMASH) | AspGD ID          |     |
|-------------------|----------------|---------------|------------|-------------------------------------------------------------------------------------------------------------------------------------------------------------------------------------------------------------------------|------------------------|-------------------|-----|
| n/a               |                |               |            | Protein of unknown function                                                                                                                                                                                             | prot_ID_958            | An01g01050        |     |
| n/a               |                |               |            | Putative splicing factor                                                                                                                                                                                                | prot_ID_1184           | An01g01060        |     |
| n/a               |                |               |            | Oxidoreductase                                                                                                                                                                                                          | prot_ID_1058           | An01g01070        |     |
| An01g01080        | 4              | 807           |            | Domain(s) with predicted nucleotide binding, oxidoreductase activity and role in oxidation-reduction process                                                                                                            | prot_ID_1314           | An01g01080        |     |
| An01g01090        | 3              | 2034          |            | Similarity to TATA-binding protein-associated phosphoprotein Dr1                                                                                                                                                        | prot_ID_1401           | An01g01090        |     |
| An01g01110        | 2              | 807           |            | Domain(s) with predicted hydrolase activity                                                                                                                                                                             | prot_ID_392            | An01g01110        | FA  |
| An01g01120        | 1              | 516           |            | Protein of unknown function                                                                                                                                                                                             | prot_ID_243            | An01g01120        |     |
| <b>An01g01130</b> | 0              | 0             |            | <b>Polyketide synthase</b>                                                                                                                                                                                              | <b>prot_ID_1186</b>    | <b>An01g01130</b> |     |
|                   |                |               |            | Ortholog of <i>A. nidulans</i> FGSC A4 : AN6764, AN2660, AN7798, <i>A. fumigatus</i> Af293 : Afu8g01960 and <i>A. niger</i> CBS 513.88 : An15g04120, An11g05430, An01g12050, An11g03480                                 | prot_ID_1125           | An01g01140        |     |
| An01g01140        | -1             | 1790          |            | Similar to surface recognition protein PTH11                                                                                                                                                                            | prot_ID_942            | An01g01150        |     |
| An01g01150        | -2             | 261           |            | Has domain(s) with predicted hydrolase activity and role in metabolic process                                                                                                                                           | prot_ID_849            | An01g01160        |     |
| n/a               |                |               |            | Ortholog of <i>A. nidulans</i> FGSC A4 : AN5419, <i>A. niger</i> CBS 513.88 : An18g02752, <i>A. oryzae</i> RIB40 : AO090012000481, <i>A. niger</i> ATCC 1015 : 206357-mRNA and <i>A. versicolor</i> : Aspve1_0135496    | prot_ID_730            | An01g01170        |     |
| n/a               |                |               |            | Has domain(s) with predicted chromate transmembrane transporter activity and role in chromate transport                                                                                                                 | prot_ID_69             | An01g01180        |     |
| n/a               |                |               |            | Ortholog of <i>A. oryzae</i> RIB40 : AO090701000875, <i>A. brasiliensis</i> : Aspbr1_0654792, <i>Aspergillus flavus</i> NRRL 3357 : AFL2T_03382, AFL2T_06438 and <i>A. versicolor</i> : Aspve1_0130993                  | prot_ID_304            | An01g01190        |     |
| n/a               |                |               |            | Has domain(s) with predicted serine-type peptidase activity and role in proteolysis                                                                                                                                     | prot_ID_118            | An01g01210        |     |
| n/a               |                |               |            | Ortholog of <i>A. nidulans</i> FGSC A4 : AN11159, <i>A. niger</i> CBS 513.88 : An18g00430, <i>A. brasiliensis</i> : Aspbr1_0058364, <i>A. niger</i> ATCC 1015 : 188035-mRNA and <i>A. clavatus</i> NRRL 1 : ACLA_074330 | prot_ID_1089           | An01g01220        |     |
| n/a               |                |               |            | Protein of unknown function                                                                                                                                                                                             | n/a                    | An01g01230        | ECS |

## An01g06930/ An01g06950 cluster

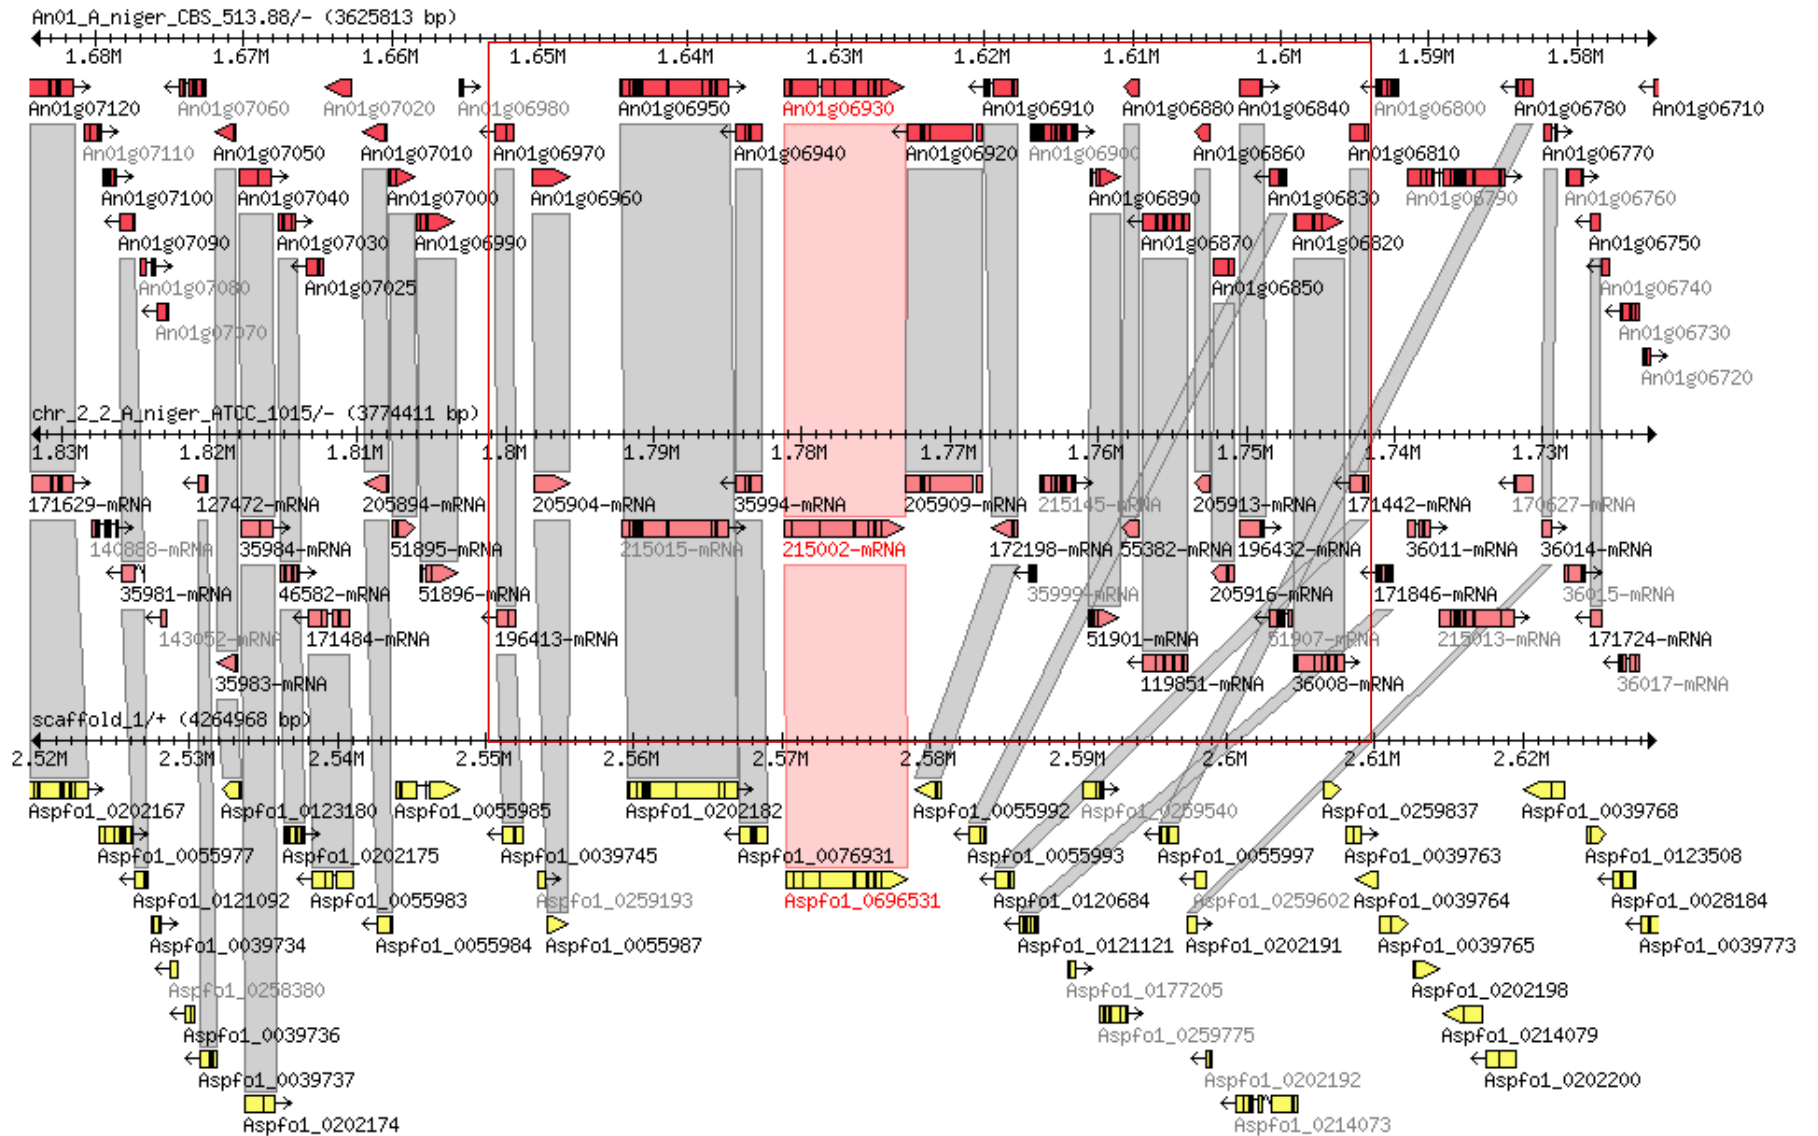



**An01g06930 cluster**

| Gene id (SMURF) | Gene positions | Gene distance | AspGD name | AspGD description line or supplemental annotation                                                                                                                                                          | protein ID (antiSMASH) | AspGD ID   |     |
|-----------------|----------------|---------------|------------|------------------------------------------------------------------------------------------------------------------------------------------------------------------------------------------------------------|------------------------|------------|-----|
| An01g06730      | 20             | 721           |            | Protein of unknown function                                                                                                                                                                                | n/a                    | An01g06730 |     |
| An01g06740      | 19             | 142           |            | Protein of unknown function                                                                                                                                                                                | n/a                    | An01g06740 |     |
| An01g06750      | 18             | 424           |            | Domain(s) with predicted N-acetyltransferase activity and role in metabolic process                                                                                                                        | n/a                    | An01g06750 |     |
| An01g06760      | 17             | 632           |            | Protein of unknown function                                                                                                                                                                                | n/a                    | An01g06760 |     |
| An01g06770      | 16             | 736           |            | Ortholog of A. oryzae RIB40 : AO090012000668, A. brasiliensis : Aspbr1_0049222, Aspergillus flavus NRRL 3357 : AFL2T_03545 and A. acidus : Aspfo1_0202191                                                  | prot_ID_542            | An01g06770 |     |
| An01g06780      | 15             | 553           |            | Domain(s) with predicted nucleotide binding activity                                                                                                                                                       | prot_ID_1315           | An01g06780 |     |
| An01g06790      | 14             | 704           |            | Protein of unknown function                                                                                                                                                                                | prot_ID_978            | An01g06790 |     |
| An01g06800      | 13             | 434           |            | Domain(s) with predicted hydrolase activity, acting on carbon-nitrogen (but not peptide) bonds, in linear amides activity, role in ceramide metabolic process and integral to membrane localization        | prot_ID_1056           | An01g06800 |     |
| An01g06810      | 12             | 362           |            | Domain(s) with predicted 5-methyltetrahydropteroyltriglutamate-homocysteine S-methyltransferase activity and role in methionine biosynthetic process                                                       | prot_ID_473            | An01g06810 | ECS |
| An01g06820      | 11             | 550           |            | Domain(s) with predicted FMN binding, NADPH-hemoprotein reductase activity, aromatase activity, electron carrier activity, heme binding, iron ion binding activity and role in oxidation-reduction process | prot_ID_174            | An01g06820 |     |
| An01g06830      | 10             | 389           |            | 3-dehydrosphinganine reductase                                                                                                                                                                             | prot_ID_687            | An01g06830 |     |
| An01g06840      | 9              | 413           |            | Putative acid-CoA ligase                                                                                                                                                                                   | prot_ID_1211           | An01g06840 |     |
| An01g06850      | 8              | 347           |            | Domain(s) with predicted metal ion binding, oxidoreductase activity and role in oxidation-reduction process                                                                                                | prot_ID_372            | An01g06850 |     |
| An01g06860      | 7              | 615           |            | Ortholog(s) have dioxygenase activity and role in austinol biosynthetic process, dehydroaustinol biosynthetic process, secondary metabolite biosynthetic process                                           | prot_ID_506            | An01g06860 |     |
| An01g06870      | 6              | 319           |            | Domain(s) with predicted pyridoxal phosphate binding, transferase activity, transferring nitrogenous groups activity and role in biosynthetic process                                                      | prot_ID_582            | An01g06870 |     |
| An01g06880      | 5              | 342           |            | Domain(s) with predicted catalytic activity, coenzyme binding, nucleotide binding activity and role in cellular metabolic process                                                                          | prot_ID_449            | An01g06880 |     |
| An01g06890      | 4              | 758           |            | Domain(s) with predicted ACP phosphopantetheine attachment site binding involved in fatty acid biosynthetic                                                                                                | prot_ID_459            | An01g06890 |     |

process activity

|                   |    |      |                                                                                                                                                                                                                                                                                                                                               |                    |                   |         |
|-------------------|----|------|-----------------------------------------------------------------------------------------------------------------------------------------------------------------------------------------------------------------------------------------------------------------------------------------------------------------------------------------------|--------------------|-------------------|---------|
| An01g06900        | 3  | 985  | Domain(s) with predicted DNA binding, sequence-specific DNA binding RNA polymerase II transcription factor activity, sequence-specific DNA binding transcription factor activity, zinc ion binding activity                                                                                                                                   | prot_ID_1399       | An01g06900        |         |
| An01g06910        | 2  | 307  | Domain(s) with predicted electron carrier activity, heme binding, iron ion binding, oxidoreductase activity, acting on paired donors, with incorporation or reduction of molecular oxygen activity and role in oxidation-reduction process                                                                                                    | prot_ID_749        | An01g06910        |         |
| An01g06920        | 1  | 439  | Domain(s) with predicted ATP binding, ATPase activity, coupled to transmembrane movement of substances activity, role in transmembrane transport and integral to membrane localization                                                                                                                                                        | prot_ID_943        | An01g06920        |         |
| <b>An01g06930</b> | 0  | 0    | Polyketide synthase                                                                                                                                                                                                                                                                                                                           | <b>prot_ID_695</b> | <b>An01g06930</b> |         |
| An01g06940        | -1 | 1532 | Domain(s) with predicted role in transmembrane transport and integral to membrane localization<br>Polyketide synthase. Ortholog(s) have role in asperfuranone biosynthetic process, emericellamide biosynthetic process, monodictyphenone biosynthetic process, o-orsellinic acid biosynthetic process, sterigmatocystin biosynthetic process | prot_ID_1431       | An01g06940        |         |
| An01g06950        | -2 | 381  | Ortholog(s) have role in asperfuranone biosynthetic process, emericellamide biosynthetic process, monodictyphenone biosynthetic process, o-orsellinic acid biosynthetic process, sterigmatocystin biosynthetic process                                                                                                                        | prot_ID_784        | An01g06950        |         |
| n/a               |    |      |                                                                                                                                                                                                                                                                                                                                               | prot_ID_1001       | An01g06960        |         |
| n/a               |    | ara1 | Ortholog(s) have intracellular localization<br>Glycerol dehydrogenase; D-arabinose 1-dehydrogenase [NAD(P)+]; protein levels influenced by presence of starch                                                                                                                                                                                 | prot_ID_905        | An01g06970        | ECS, FA |
| n/a               |    |      |                                                                                                                                                                                                                                                                                                                                               | prot_ID_37         | An01g06980        |         |
| n/a               |    |      | Protein of unknown function                                                                                                                                                                                                                                                                                                                   | prot_ID_642        | An01g06990        |         |
| n/a               |    |      | Ortholog of A. nidulans FGSC A4 : AN10694, A. fumigatus Af293 : Afu4g11740, A. niger ATCC 1015 : 51896-mRNA, A. versicolor : Aspve1_0042220 and A. sydowii : Aspsy1_0149194                                                                                                                                                                   | prot_ID_354        | An01g07000        |         |
| n/a               |    |      | C14 sterol reductase; predicted role in ergosterol synthesis; expression repressed by tunicamycin and DTT; induced by fenpropimorph                                                                                                                                                                                                           | prot_ID_1412       | An01g07010        |         |
| n/a               |    |      | Has domain(s) with predicted zinc ion binding activity                                                                                                                                                                                                                                                                                        | prot_ID_203        | An01g07020        |         |

## An01g11770 cluster

No ATCC 1015 orthologous cluster

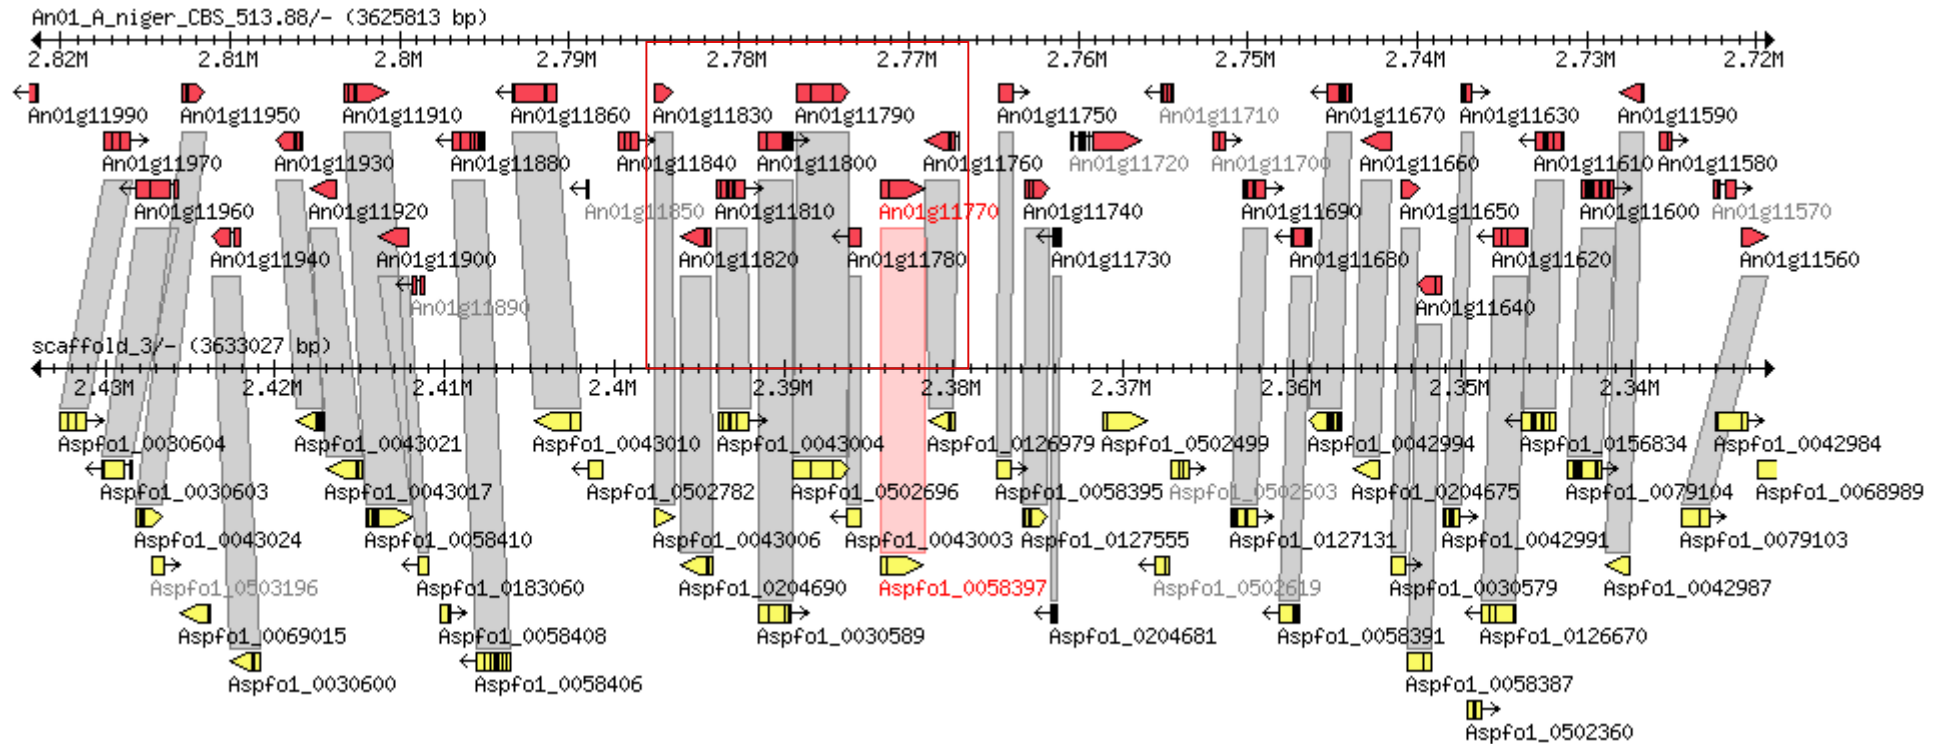

**An01g11770 cluster**

| Gene id (SMURF)   | Gene positions | Gene distance | AspGD name | AspGD description line or supplemental annotation                                                                                                                                        | protein ID (antiSMASH) | AspGD ID          |
|-------------------|----------------|---------------|------------|------------------------------------------------------------------------------------------------------------------------------------------------------------------------------------------|------------------------|-------------------|
| n/a               |                |               |            | Ortholog of A. nidulans FGSC A4 : AN8943, A. fumigatus Af293 : Afu2g00900, Afu6g11560, A. niger CBS 513.88 : An05g02420, An03g01300 and A. oryzae RIB40 : AO090113000175, AO090023000422 | prot_ID_168            | An01g11690        |
| n/a               |                |               |            |                                                                                                                                                                                          | prot_ID_693            | An01g11700        |
| n/a               |                |               |            | Has domain(s) with predicted transmembrane transporter activity, role in transmembrane transport and integral to membrane localization                                                   | prot_ID_798            | An01g11710        |
| n/a               |                |               |            | Has domain(s) with predicted FMN binding, iron-sulfur cluster binding, oxidoreductase activity                                                                                           | prot_ID_423            | An01g11720        |
| n/a               |                |               |            | Ortholog of A. acidus : Aspfo1_0204681                                                                                                                                                   | prot_ID_1350           | An01g11730        |
| An01g11740        | 3              | 672           |            | Domain(s) with predicted dipeptidase activity, dipeptidyl-peptidase activity, metalloexopeptidase activity and role in proteolysis                                                       | prot_ID_1077           | An01g11740        |
| An01g11750        | 2              | 2380          |            | Domain(s) with predicted ATP binding, protein kinase activity and role in protein phosphorylation                                                                                        | prot_ID_303            | An01g11750        |
| An01g11760        | 1              | 175           |            | Domain(s) with predicted role in transmembrane transport and integral to membrane localization                                                                                           | prot_ID_1380           | An01g11760        |
|                   |                |               |            | Domain(s) with predicted ACP phosphopantetheine attachment site binding involved in fatty acid biosynthetic process, ligase activity, phosphopantetheine binding activity                |                        | IGD, ECS          |
| <b>An01g11770</b> | 0              | 0             |            |                                                                                                                                                                                          | <b>prot_ID_654</b>     | <b>An01g11770</b> |
| An01g11780        | -1             | 1165          |            | Domain(s) with predicted hydrolase activity                                                                                                                                              | prot_ID_1296           | An01g11780        |
| An01g11790        | -2             | 65            |            | Ortholog(s) have role in secondary metabolic process                                                                                                                                     | prot_ID_435            | An01g11790        |
| An01g11800        | -3             | 271           |            | Domain(s) with predicted monooxygenase activity and role in oxidation-reduction process                                                                                                  | prot_ID_1023           | An01g11800        |
| An01g11810        | -4             | 1030          |            | Domain(s) with predicted hydrolase activity                                                                                                                                              | prot_ID_510            | An01g11810        |
| An01g11820        | -5             | 424           |            | Domain(s) with predicted nucleic acid binding, nucleotide binding activity                                                                                                               | prot_ID_929            | An01g11820        |
| An01g11830        | -6             | 509           |            | Ortholog of A. brasiliensis : Aspbr1_0039523 and A. acidus : Aspfo1_0043006                                                                                                              | prot_ID_1071           | An01g11830        |
|                   |                |               |            | Ortholog of A. nidulans FGSC A4 : AN7889, AN4657, A. fumigatus Af293 : Afu1g00920, Afu3g06425 and A. niger CBS 513.88 : An07g04250, An05g02120, An12g06960                               |                        | ECS, IGD          |
| An01g11840        | -7             | 908           |            |                                                                                                                                                                                          | prot_ID_1270           | An01g11840        |
| An01g11850        | -8             | 1765          |            |                                                                                                                                                                                          | prot_ID_836            | An01g11850        |

|            |     |      |                                                                                                                                                                                                                                            |              |            |
|------------|-----|------|--------------------------------------------------------------------------------------------------------------------------------------------------------------------------------------------------------------------------------------------|--------------|------------|
| An01g11860 | -9  | 666  | Domain(s) with predicted DNA binding, sequence-specific DNA binding RNA polymerase II transcription factor activity, sequence-specific DNA binding transcription factor activity, zinc ion binding activity                                | prot_ID_1177 | An01g11860 |
| An01g11880 | -10 | 1642 | Domain(s) with predicted electron carrier activity, heme binding, iron ion binding, oxidoreductase activity, acting on paired donors, with incorporation or reduction of molecular oxygen activity and role in oxidation-reduction process | prot_ID_384  | An01g11880 |
| An01g11890 | -11 | 1713 |                                                                                                                                                                                                                                            | n/a          | An01g11890 |
| An01g11900 | -12 | 295  | Domain(s) with predicted nucleic acid binding, zinc ion binding activity and intracellular localization                                                                                                                                    | n/a          | An01g11900 |

## An02g00210 cluster

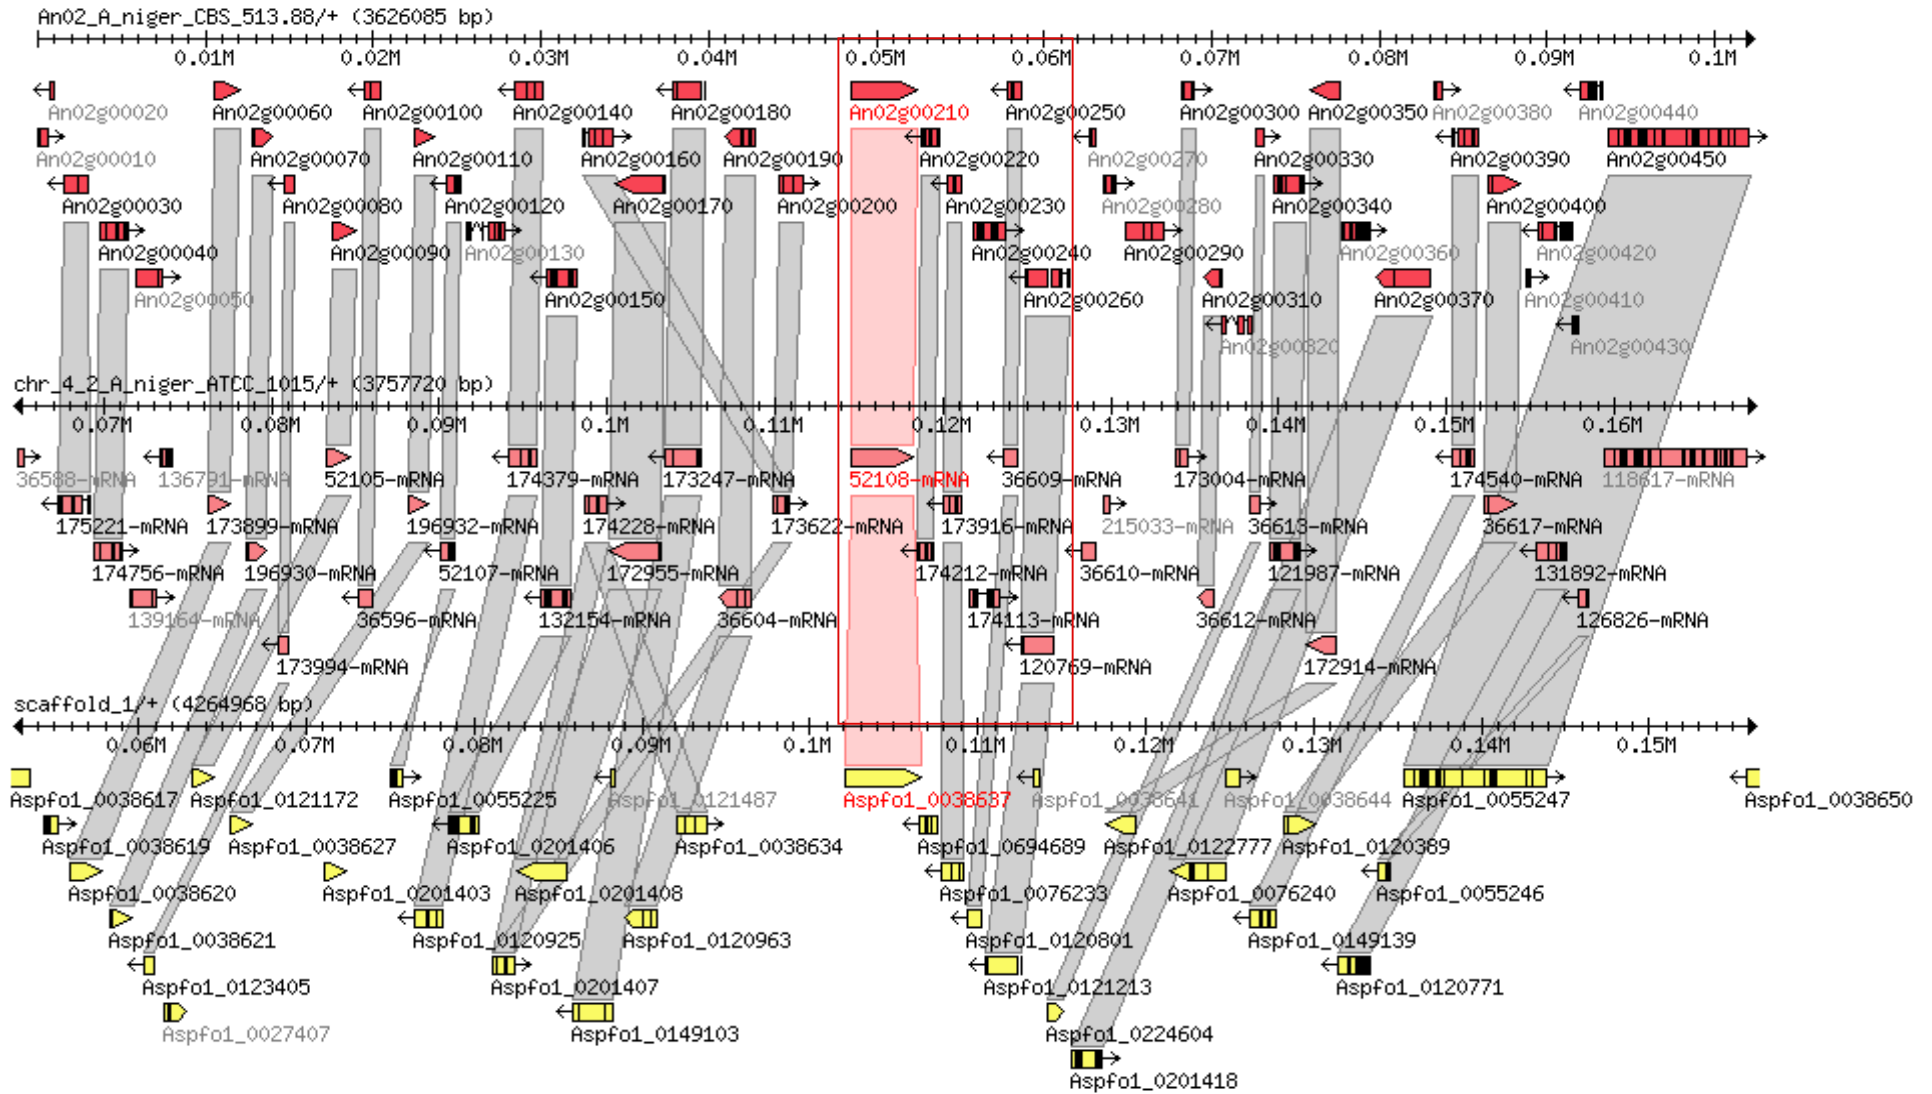

**An02g00210 cluster**

| Gene id (SMURF)   | Gene positions | Gene distance | AspGD name | AspGD description line or supplemental annotation                                                                                                                                                                                                                           | protein ID (antiSMASH) | AspGD ID          |     |
|-------------------|----------------|---------------|------------|-----------------------------------------------------------------------------------------------------------------------------------------------------------------------------------------------------------------------------------------------------------------------------|------------------------|-------------------|-----|
| n/a               |                |               |            | Xylan-1,4-beta-xylosidase                                                                                                                                                                                                                                                   | prot_ID_725            | An02g00140        |     |
| An02g00150        | 6              | 377           |            | Domain(s) with predicted electron carrier activity, heme binding, iron ion binding, oxidoreductase activity, acting on paired donors, with incorporation or reduction of molecular oxygen activity and role in oxidation-reduction process                                  | prot_ID_112            | An02g00150        |     |
| An02g00160        | 5              | 118           |            | Protein with strong similarity to appressorium differentiation protein pth11 of Magnaporthe grisea                                                                                                                                                                          | prot_ID_783            | An02g00160        |     |
| An02g00170        | 4              | 436           |            | Domain(s) with predicted hydrolase activity                                                                                                                                                                                                                                 | prot_ID_428            | An02g00170        |     |
| An02g00180        | 3              | 1111          |            | Putative phosphate-repressible phosphate permease                                                                                                                                                                                                                           | prot_ID_673            | An02g00180        |     |
| An02g00190        | 2              | 1379          |            | Protein similar to enantiomer-selective amidase; expression repressed by tunicamycin and DTT<br>Ortholog of A. nidulans FGSC A4 : AN8951, A. niger CBS 513.88 : An02g00160, A. oryzae RIB40 : AO090010000027, AO090011000356 and A. niger ATCC 1015 : 174228-mRNA           | prot_ID_679            | An02g00190        |     |
| An02g00200        | 1              | 2966          |            |                                                                                                                                                                                                                                                                             | prot_ID_106            | An02g00200        |     |
| <b>An02g00210</b> | 0              | 0             |            | <b>NRPS-like protein</b><br>Ortholog(s) have tetrahydroxynaphthalene reductase activity, versicolorin reductase activity, role in melanin biosynthetic process, monodictyphenone biosynthetic process, sterigmatocystin biosynthetic process and intracellular localization | <b>prot_ID_621</b>     | <b>An02g00210</b> | ECS |
| An02g00220        | -1             | 363           |            | Ortholog(s) have dioxygenase activity and role in austinol biosynthetic process, dehydroaustinol biosynthetic process, secondary metabolite biosynthetic process                                                                                                            | prot_ID_1155           | An02g00220        |     |
| An02g00230        | -2             | 543           |            | Domain(s) with predicted amino acid transmembrane transporter activity, role in amino acid transmembrane transport and membrane localization                                                                                                                                | prot_ID_1019           | An02g00230        |     |
| An02g00240        | -3             | 675           |            | Domain(s) with predicted deoxyribose-phosphate aldolase activity, role in deoxyribonucleotide catabolic process and cytoplasm localization                                                                                                                                  | prot_ID_1107           | An02g00240        |     |
| An02g00250        | -4             | 56            |            | Ortholog(s) have role in positive regulation of transcription from RNA polymerase II promoter, short-chain fatty acid catabolic process                                                                                                                                     | prot_ID_686            | An02g00250        |     |
| An02g00260        | -5             | 246           |            |                                                                                                                                                                                                                                                                             | prot_ID_1032           | An02g00260        | ECS |
| An02g00270        | -6             | 1160          |            | Protein of unknown function                                                                                                                                                                                                                                                 | prot_ID_820            | An02g00270        |     |
| An02g00280        | -7             | 482           |            | Domain(s) with predicted role in transmembrane transport and integral to membrane localization                                                                                                                                                                              | prot_ID_1091           | An02g00280        |     |

|            |    |     |                                                                                                                                                                                                                 |             |            |
|------------|----|-----|-----------------------------------------------------------------------------------------------------------------------------------------------------------------------------------------------------------------|-------------|------------|
| An02g00290 | -8 | 553 | Domain(s) with predicted DNA binding, sequence-specific DNA binding RNA polymerase II transcription factor activity, sequence-specific DNA binding transcription factor activity, zinc ion binding activity     | prot_ID_659 | An02g00290 |
| n/a        |    |     | Has domain(s) with predicted DNA binding, sequence-specific DNA binding RNA polymerase II transcription factor activity, sequence-specific DNA binding transcription factor activity, zinc ion binding activity | prot_ID_3   | An02g00300 |
| n/a        |    |     | Has domain(s) with predicted hydrolase activity                                                                                                                                                                 | prot_ID_651 | An02g00310 |
| n/a        |    |     | Has domain(s) with predicted oxidoreductase activity and role in oxidation-reduction process                                                                                                                    | prot_ID_827 | An02g00320 |



## An02g00450 cluster

No ATCC 1015 ortlogous cluster, no manual prediction made

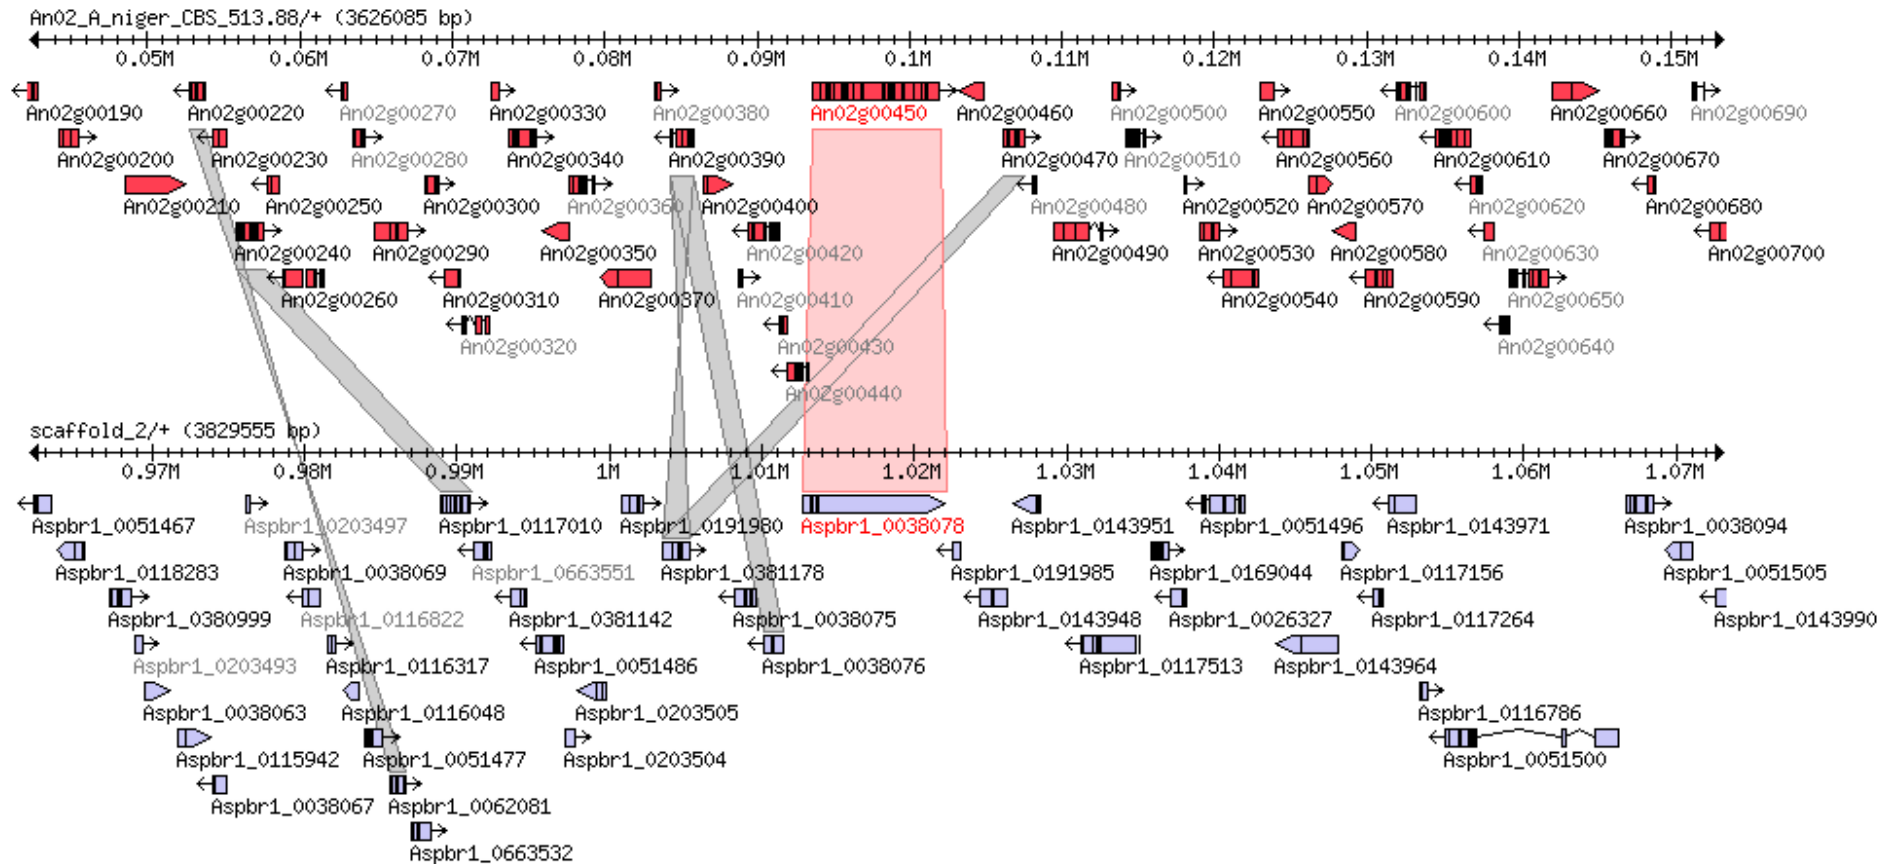

**An02g00450 cluster**

| Gene id (SMURF)   | Gene positions | Gene distance | AspGD name | AspGD description line or supplemental annotation                                                                                                                                                                             | protein ID (antiSMASH) | AspGD ID          |
|-------------------|----------------|---------------|------------|-------------------------------------------------------------------------------------------------------------------------------------------------------------------------------------------------------------------------------|------------------------|-------------------|
| n/a               |                |               |            | Putative amidase/acetamidase                                                                                                                                                                                                  | prot_ID_1183           | An02g00340        |
| n/a               |                |               |            | Tannin acyl hydrolase with a predicted role in tannic acid degradation                                                                                                                                                        | prot_ID_658            | An02g00350        |
| n/a               |                |               |            |                                                                                                                                                                                                                               | prot_ID_1094           | An02g00360        |
| n/a               |                |               |            | Ortholog of A. nidulans FGSC A4 : AN9323, A. niger CBS 513.88 : An06g00670, A. oryzae RIB40 : AO090102000655 and A. versicolor : Aspve1_0090061, Aspve1_0142746                                                               | prot_ID_325            | An02g00370        |
| n/a               |                |               |            |                                                                                                                                                                                                                               | prot_ID_1316           | An02g00380        |
| n/a               |                |               |            | Ortholog of A. nidulans FGSC A4 : AN6413, AN8328, AN3395, AN3241, AN10369, AN1930, AN2386, AN1738, AN9266, AN10886, AN7232, AN7406, AN7774, AN12202                                                                           | prot_ID_179            | An02g00390        |
| n/a               |                |               |            | Has domain(s) with predicted choline dehydrogenase activity, flavin adenine dinucleotide binding activity and role in alcohol metabolic process, oxidation-reduction process                                                  | prot_ID_1333           | An02g00400        |
| n/a               |                |               |            |                                                                                                                                                                                                                               | prot_ID_1263           | An02g00410        |
| n/a               |                |               |            |                                                                                                                                                                                                                               | prot_ID_802            | An02g00420        |
| An02g00430        | 2              | 102           |            | Protein of unknown function                                                                                                                                                                                                   | prot_ID_305            | An02g00430        |
| An02g00440        | 1              | 257           |            | Protein of unknown function                                                                                                                                                                                                   | prot_ID_20             | An02g00440        |
| <b>An02g00450</b> | 0              | 0             |            | <b>Ortholog(s) have role in asperfuranone biosynthetic process, emericellamide biosynthetic process, monodictyphenone biosynthetic process, o-orsellinic acid biosynthetic process, sterigmatocystin biosynthetic process</b> | <b>prot_ID_1412</b>    | <b>An02g00450</b> |
| An02g00460        | -1             | 1082          |            | Domain(s) with predicted UDP-N-acetylmuramate dehydrogenase activity, flavin adenine dinucleotide binding activity and role in oxidation-reduction process                                                                    | prot_ID_1137           | An02g00460        |
| An02g00470        | -2             | 1333          |            | Ortholog of A. nidulans FGSC A4 : AN6413, AN8328, AN3395, AN3241, AN10369, AN1930, AN2386, AN1738, AN9266, AN10886, AN7232, AN7406, AN7774, AN12202                                                                           | prot_ID_212            | An02g00470        |
| An02g00480        | -3             | 453           |            | Protein of unknown function                                                                                                                                                                                                   | prot_ID_198            | An02g00480        |
| An02g00490        | -4             | 1081          |            | Ortholog of A. nidulans FGSC A4 : AN6829, A. fumigatus Af293 : Afu5g12710, A. niger CBS 513.88 : An01g12010, A. niger ATCC 1015 : 46369-mRNA and A. versicolor : Aspve1_0120985, Aspve1_0178343                               | prot_ID_551            | An02g00490        |
| An02g00500        | -5             | 548           |            | Protein of unknown function                                                                                                                                                                                                   | prot_ID_514            | An02g00500        |
| An02g00510        | -6             | 326           |            | Protein of unknown function                                                                                                                                                                                                   | prot_ID_564            | An02g00510        |
| An02g00520        | -7             | 2532          |            | Ortholog of A. acidus : Aspfo1_0055254                                                                                                                                                                                        | prot_ID_1055           | An02g00520        |

|            |     |     |                                                                                                                                                                                                                                     |              |            |
|------------|-----|-----|-------------------------------------------------------------------------------------------------------------------------------------------------------------------------------------------------------------------------------------|--------------|------------|
| An02g00530 | -8  | 824 | Domain(s) with predicted role in response to stress and integral to membrane localization                                                                                                                                           | prot_ID_1411 | An02g00530 |
| An02g00540 | -9  | 238 | Domain(s) with predicted DNA binding, sequence-specific DNA binding RNA polymerase II transcription factor activity, sequence-specific DNA binding transcription factor activity, zinc ion binding activity                         | prot_ID_1480 | An02g00540 |
| An02g00550 | -10 | 75  | Domain(s) with predicted oxidoreductase activity, acting on paired donors, with incorporation or reduction of molecular oxygen, 2-oxoglutarate as one donor, and incorporation of one atom each of oxygen into both donors activity | n/a          | An02g00550 |
| An02g00560 | -11 | 147 | Domain(s) with predicted transporter activity, role in transmembrane transport and membrane localization                                                                                                                            | n/a          | An02g00560 |
| An02g00570 | -12 | 17  | Domain(s) with predicted hydrolase activity, acting on carbon-nitrogen (but not peptide) bonds activity                                                                                                                             | n/a          | An02g00570 |
| An02g00580 | -13 | 48  | Domain(s) with predicted catalytic activity                                                                                                                                                                                         | n/a          | An02g00580 |

# An02g00840 cluster

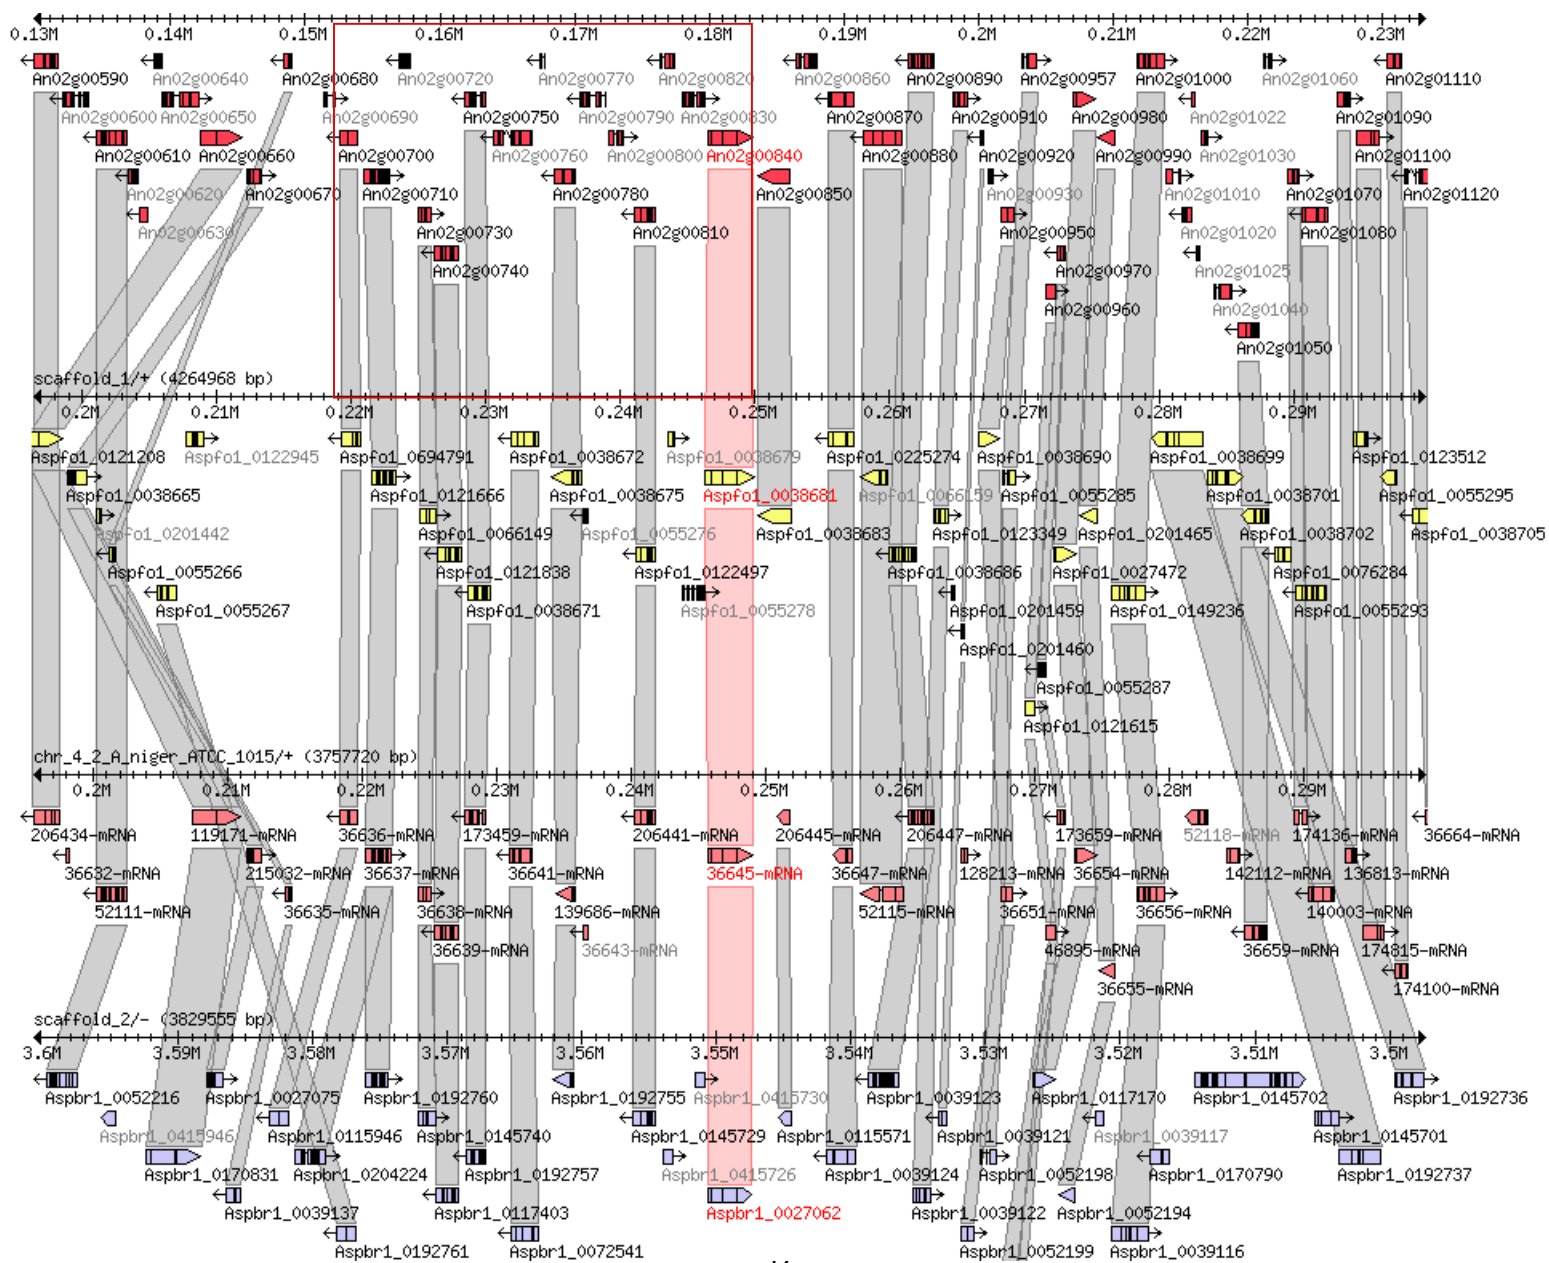

**An02g00840 cluster**

| Gene id (SMURF)   | Gene positions | Gene distance | AspGD name | AspGD description line or supplemental annotation                                                                                                                                                                                     | protein ID (antiSMASH) | AspGD ID          |          |
|-------------------|----------------|---------------|------------|---------------------------------------------------------------------------------------------------------------------------------------------------------------------------------------------------------------------------------------|------------------------|-------------------|----------|
| n/a               |                |               |            | Protein of unknown function                                                                                                                                                                                                           | n/a                    | An02g00700        | ECS, IGD |
| An02g00710        | 13             | 527           |            | Domain(s) with predicted ATP binding activity                                                                                                                                                                                         | n/a                    | An02g00710        |          |
| An02g00720        | 12             | 591           |            | Protein of unknown function                                                                                                                                                                                                           | n/a                    | An02g00720        |          |
| An02g00730        | 11             | 191           |            | Ortholog(s) have triglyceride lipase activity and role in triglyceride catabolic process                                                                                                                                              | n/a                    | An02g00730        |          |
| An02g00740        | 10             | 526           |            | Domain(s) with predicted UDP-N-acetylmuramate dehydrogenase activity, flavin adenine dinucleotide binding activity and role in oxidation-reduction process                                                                            | prot_ID_813            | An02g00740        |          |
| An02g00750        | 9              | 639           |            | Ortholog of <i>A. nidulans</i> FGSC A4 : AN6413, AN8328, AN3395, AN3241, AN10369, AN1930, AN2386, AN1738, AN9266, AN10886, AN7232, AN7406, AN7774, AN12202                                                                            | prot_ID_306            | An02g00750        |          |
| An02g00760        | 8              | 585           |            | Domain(s) with predicted role in transmembrane transport and integral to membrane localization                                                                                                                                        | prot_ID_167            | An02g00760        |          |
| An02g00770        | 7              | 659           |            | Protein of unknown function                                                                                                                                                                                                           | prot_ID_891            | An02g00770        |          |
| An02g00780        | 6              | 276           |            | Ortholog of <i>A. nidulans</i> FGSC A4 : AN1725, <i>A. fumigatus</i> Af293 : Afu2g14400, <i>A. niger</i> CBS 513.88 : An12g01310, <i>A. oryzae</i> RIB40 : AO090012000862, AO090023000064 and <i>A. niger</i> ATCC 1015 : 133532-mRNA | prot_ID_1475           | An02g00780        |          |
| An02g00790        | 5              | 237           |            | Protein of unknown function                                                                                                                                                                                                           | prot_ID_56             | An02g00790        |          |
| An02g00800        | 4              | 770           |            | Protein of unknown function                                                                                                                                                                                                           | prot_ID_437            | An02g00800        |          |
| An02g00810        | 3              | 385           |            | Domain(s) with predicted O-methyltransferase activity                                                                                                                                                                                 | prot_ID_169            | An02g00810        |          |
| An02g00820        | 2              | 607           |            | Protein of unknown function                                                                                                                                                                                                           | prot_ID_931            | An02g00820        |          |
| An02g00830        | 1              | 70            |            | Protein of unknown function                                                                                                                                                                                                           | prot_ID_55             | An02g00830        |          |
| <b>An02g00840</b> | 0              | 0             |            | Domain(s) with predicted ACP phosphopantetheine attachment site binding involved in fatty acid biosynthetic process, catalytic activity, nucleotide binding activity                                                                  | <b>prot_ID_1343</b>    | <b>An02g00840</b> | ECS, FA  |
| An02g00850        | -1             | 610           |            | Glucoamylase (exo-1,4-glucosidase/amyloglucosidase)                                                                                                                                                                                   | prot_ID_1362           | An02g00850        |          |
| An02g00860        | -2             | 425           |            | Protein of unknown function                                                                                                                                                                                                           | prot_ID_11             | An02g00860        |          |
| n/a               |                |               |            | Has domain(s) with predicted protein dimerization activity, sequence-specific DNA binding, sequence-specific DNA binding transcription factor activity and role in regulation of transcription, DNA-dependent                         | prot_ID_811            | An02g00870        |          |

|     |                                                                                                                                                                   |              |            |
|-----|-------------------------------------------------------------------------------------------------------------------------------------------------------------------|--------------|------------|
| n/a | Has domain(s) with predicted zinc ion binding activity                                                                                                            | prot_ID_513  | An02g00880 |
| n/a | Phosphoserine transaminase                                                                                                                                        | prot_ID_841  | An02g00890 |
| n/a | Has domain(s) with predicted nucleotide binding activity                                                                                                          | prot_ID_538  | An02g00910 |
| n/a | Ortholog of A. brasiliensis : Aspbr1_0039121, A. acidus : Aspfo1_0201460 and Aspergillus carbonarius ITEM 5010 : Acar5010_001048                                  | prot_ID_344  | An02g00920 |
| n/a |                                                                                                                                                                   | prot_ID_1208 | An02g00930 |
| n/a | Ortholog of A. versicolor : Aspve1_0031571, A. sydowii : Aspsy1_0048510, Aspergillus terreus NIH2624 : ATET_00686, ATET_05781 and A. niger ATCC 1015 : 36651-mRNA | prot_ID_1409 | An02g00950 |

# An02g05070 cluster

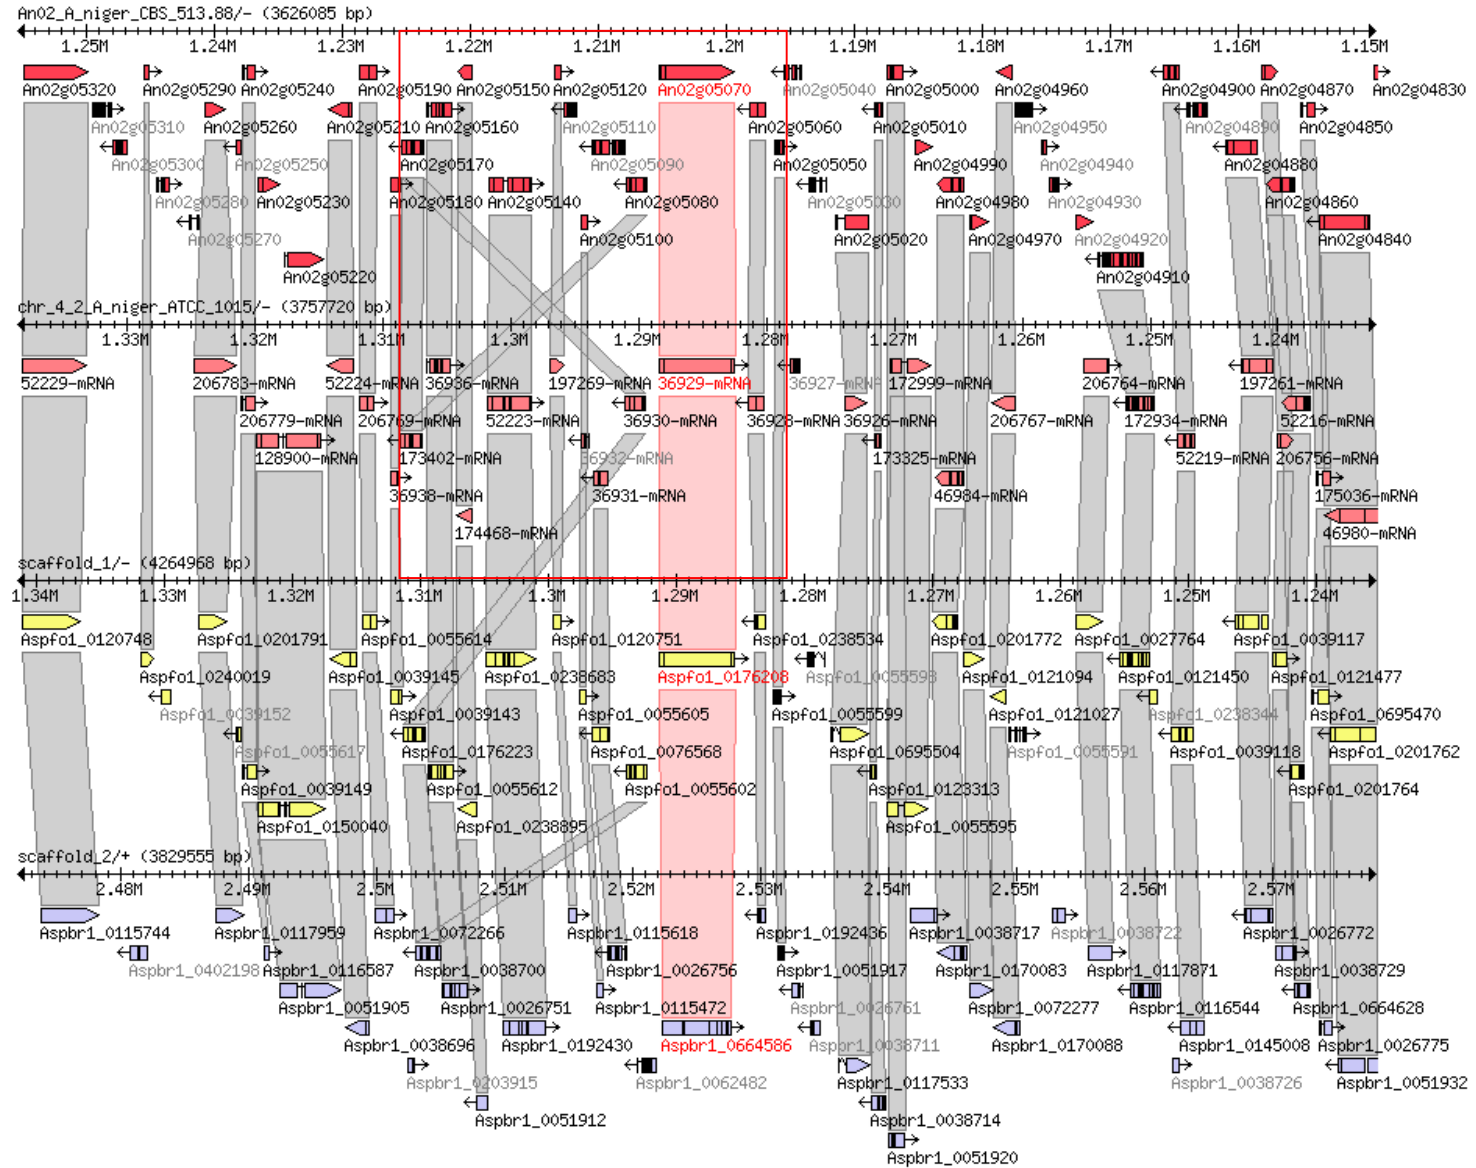

**An02g05070 cluster**

| Gene id (SMURF)   | Gene positions | Gene distance | AspGD name | AspGD description line or supplemental annotation                                                                                                                                                                                     | protein ID (antiSMASH) | AspGD ID          |
|-------------------|----------------|---------------|------------|---------------------------------------------------------------------------------------------------------------------------------------------------------------------------------------------------------------------------------------|------------------------|-------------------|
| n/a               |                |               |            | Ortholog of <i>A. nidulans</i> FGSC A4 : AN6372, <i>A. fumigatus</i> Af293 : Afu2g13990, <i>A. oryzae</i> RIB40 : AO090026000161, <i>A. versicolor</i> : Aspve1_0083251 and <i>A. sydowii</i> : Aspsy1_0045547                        | prot_ID_699            | An02g04970        |
| n/a               |                |               |            | Has domain(s) with predicted ATP binding, ATP-dependent helicase activity, nucleic acid binding activity                                                                                                                              | prot_ID_1481           | An02g04980        |
| n/a               |                |               |            | Ortholog of <i>Aspergillus carbonarius</i> ITEM 5010 : Acar5010_512192                                                                                                                                                                | prot_ID_610            | An02g04990        |
| n/a               |                |               |            | Has domain(s) with predicted transferase activity, transferring acyl groups activity and role in metabolic process                                                                                                                    | prot_ID_390            | An02g05000        |
| n/a               |                |               |            | Ortholog of <i>A. nidulans</i> FGSC A4 : AN6376, <i>A. oryzae</i> RIB40 : AO090026000166, <i>A. niger</i> ATCC 1015 : 173325-mRNA, <i>A. versicolor</i> : Aspve1_0041315 and <i>A. sydowii</i> : Aspsy1_0058298                       | prot_ID_772            | An02g05010        |
| n/a               |                |               |            | Ortholog of <i>A. nidulans</i> FGSC A4 : AN6377, <i>A. brasiliensis</i> : Aspbr1_0117533, <i>A. niger</i> ATCC 1015 : 36926-mRNA, <i>N. fischeri</i> NRRL 181 : NFIA_089130 and <i>A. clavatus</i> NRRL 1 : ACLA_073670               | prot_ID_105            | An02g05020        |
| n/a               |                |               |            | Protein of unknown function                                                                                                                                                                                                           | prot_ID_1163           | An02g05030        |
| n/a               |                |               |            | Protein of unknown function                                                                                                                                                                                                           | prot_ID_157            | An02g05040        |
| An02g05050        | 2              | 876           |            | Ortholog of <i>A. brasiliensis</i> : Aspbr1_0051917 and <i>A. acidus</i> : Aspfo1_0055599                                                                                                                                             | prot_ID_471            | An02g05050 ECS    |
| An02g05060        | 1              | 1776          |            | Ortholog of <i>A. nidulans</i> FGSC A4 : AN6378, <i>A. oryzae</i> RIB40 : AO090026000168, <i>A. niger</i> ATCC 1015 : 36928-mRNA, <i>A. versicolor</i> : Aspve1_0052621 and <i>A. sydowii</i> : Aspsy1_0045559                        | prot_ID_1201           | An02g05060        |
| <b>An02g05070</b> | 0              | 0             |            | Domain(s) with predicted ACP phosphopantetheine attachment site binding involved in fatty acid biosynthetic process, ligase activity                                                                                                  | <b>prot_ID_161</b>     | <b>An02g05070</b> |
| An02g05080        | -1             | 1012          |            | Ortholog(s) have role in monodictyphenone biosynthetic process, secondary metabolic process                                                                                                                                           | prot_ID_1456           | An02g05080        |
| An02g05090        | -2             | 186           |            | Domain(s) with predicted electron carrier activity, heme binding, iron ion binding, monooxygenase activity, oxidoreductase activity, acting on paired donors, with incorporation or reduction of molecular oxygen activity            | prot_ID_75             | An02g05090        |
| An02g05100        | -3             | 449           |            | Ortholog of <i>A. fumigatus</i> Af293 : Afu2g13940, <i>A. oryzae</i> RIB40 : AO090026000178, <i>A. brasiliensis</i> : Aspbr1_0115472, <i>N. fischeri</i> NRRL 181 : NFIA_089100 and <i>Aspergillus flavus</i> NRRL 3357 : AFL2T_07068 | prot_ID_569            | An02g05100        |



|            |     |      |                                                                                                                                                                                                                                                                            |              |            |     |
|------------|-----|------|----------------------------------------------------------------------------------------------------------------------------------------------------------------------------------------------------------------------------------------------------------------------------|--------------|------------|-----|
| An02g05110 | -4  | 361  | Protein of unknown function<br>Ortholog of <i>A. nidulans</i> FGSC A4 : AN6380, <i>A. fumigatus</i> Af293 : Afu2g13930, <i>A. oryzae</i> RIB40 : AO090026000179, <i>A. niger</i> ATCC 1015 : 197269-mRNA                                                                   | prot_ID_168  | An02g05110 |     |
| An02g05120 | -5  | 203  | and <i>A. versicolor</i> : Aspve1_0052622<br>Ortholog of <i>A. oryzae</i> RIB40 : AO090026000180, <i>A. brasiliensis</i> : Aspbr1_0192430, <i>A. niger</i> ATCC 1015 : 52223-mRNA, <i>Aspergillus flavus</i> NRRL 3357 : AFL2T_07066 and <i>A. acidus</i> : Aspfo1_0238683 | prot_ID_652  | An02g05120 |     |
| An02g05140 | -6  | 1735 | Domain(s) with predicted cholesterol delta-isomerase activity, role in sterol metabolic process and endoplasmic reticulum, integral to membrane localization                                                                                                               | prot_ID_678  | An02g05140 |     |
| An02g05150 | -7  | 1293 | Ortholog of <i>A. brasiliensis</i> : Aspbr1_0026751, <i>A. acidus</i> : Aspfo1_0055612, <i>A. versicolor</i> : Aspve1_0028748 and <i>A. sydowii</i> : Aspsy1_0032344                                                                                                       | prot_ID_119  | An02g05150 |     |
| An02g05160 | -8  | 665  | Ortholog(s) have role in monodictyphenone biosynthetic process, secondary metabolic process                                                                                                                                                                                | prot_ID_752  | An02g05160 |     |
| An02g05170 | -9  | 259  | Ortholog of <i>A. acidus</i> : Aspfo1_0039143 and <i>A. niger</i> ATCC 1015 : 36938-mRNA                                                                                                                                                                                   | prot_ID_1350 | An02g05170 | ECS |
| An02g05180 | -10 | 238  | Domain(s) with predicted nucleic acid binding, zinc ion binding activity                                                                                                                                                                                                   | n/a          | An02g05180 |     |
| An02g05190 | -11 | 1281 | Domain(s) with predicted calcium ion binding, calcium-dependent phospholipid binding activity                                                                                                                                                                              | n/a          | An02g05190 |     |
| n/a        |     |      |                                                                                                                                                                                                                                                                            | n/a          | An02g05210 |     |

## An02g08290 cluster

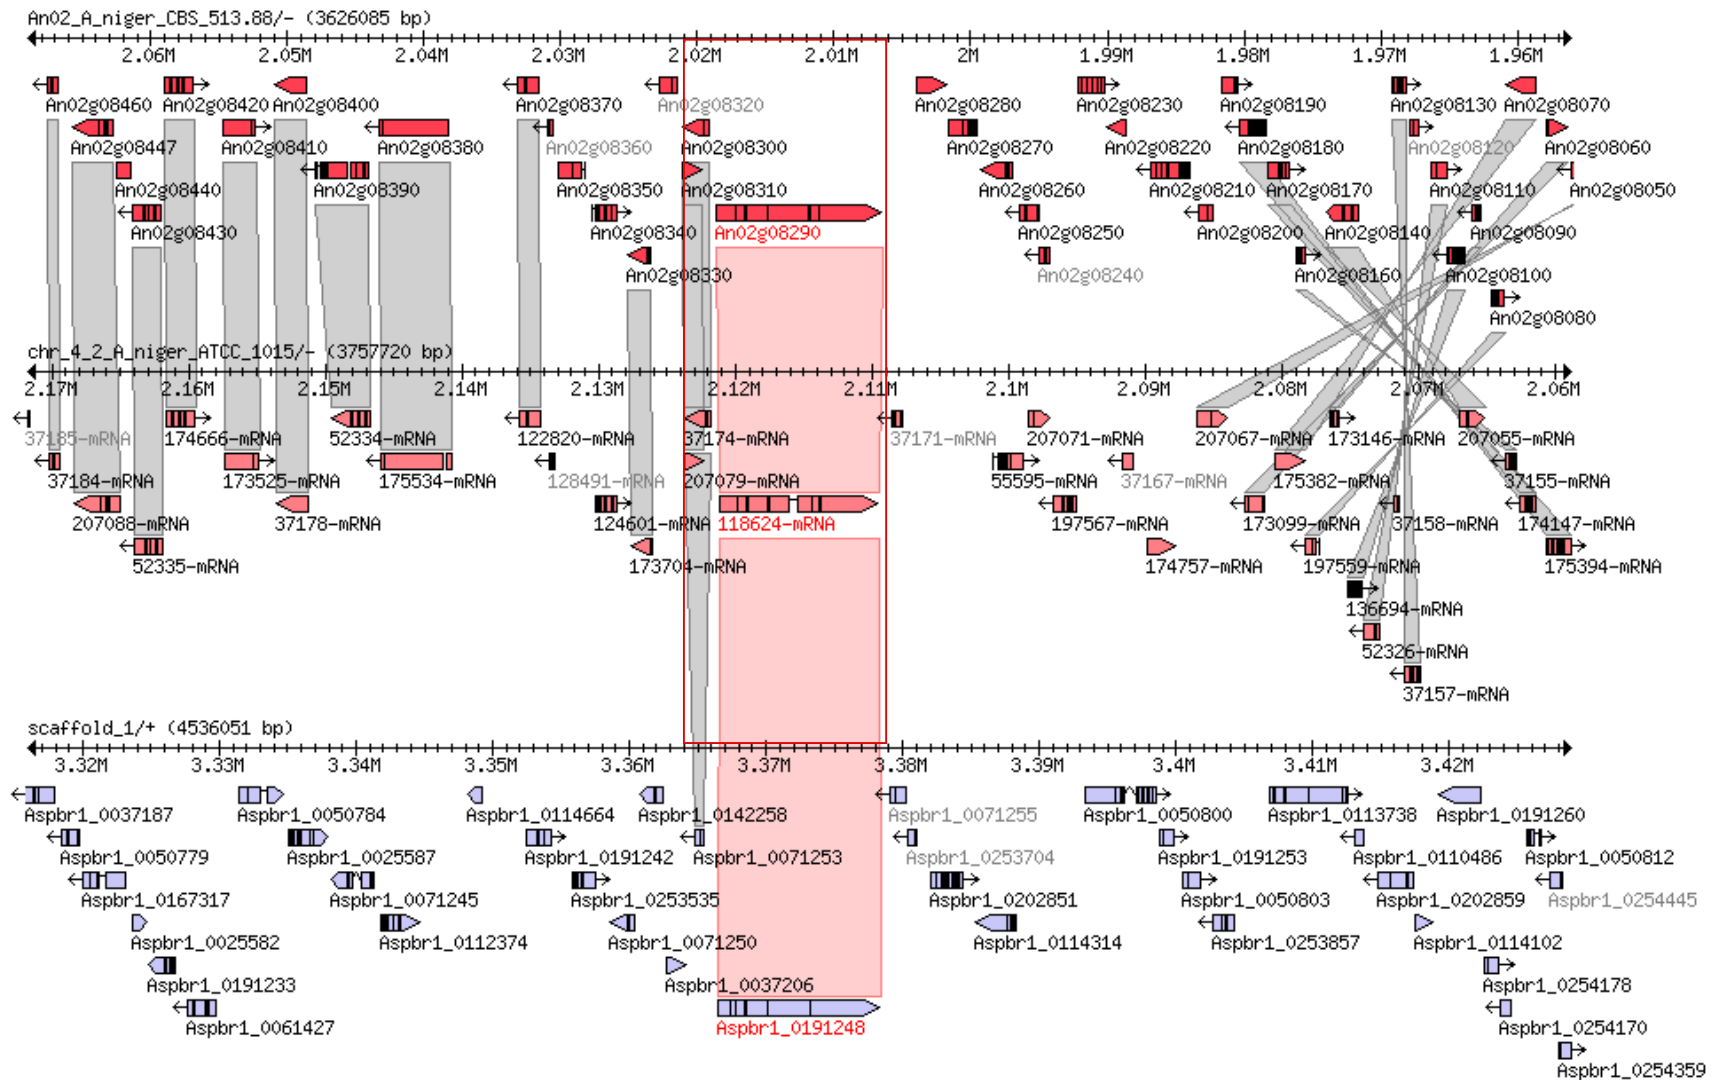

**An02g08290 cluster**

| Gene id (SMURF) | Gene positions | Gene distance | AspGD name | AspGD description line or supplemental annotation                                                                                                                                                                           | protein ID (antiSMASH) | AspGD ID   |
|-----------------|----------------|---------------|------------|-----------------------------------------------------------------------------------------------------------------------------------------------------------------------------------------------------------------------------|------------------------|------------|
| An02g08130      | 15             | 2827          |            | Ortholog of <i>A. nidulans</i> FGSC A4 : AN2844, <i>A. fumigatus</i> Af293 : Afu3g12255, <i>A. oryzae</i> RIB40 : AO090003000790, <i>A. niger</i> ATCC 1015 : 37157-mRNA and <i>A. versicolor</i> : Aspve1_0080524          | n/a                    | An02g08130 |
| An02g08140      | 14             | 1396          |            | Domain(s) with predicted protein tyrosine phosphatase activity, protein tyrosine/serine/threonine phosphatase activity and role in protein dephosphorylation                                                                | n/a                    | An02g08140 |
| An02g08160      | 13             | 402           |            | Domain(s) with predicted metal ion binding, phosphoric diester hydrolase activity                                                                                                                                           | n/a                    | An02g08160 |
| An02g08170      | 12             | 767           |            | Ortholog of <i>A. oryzae</i> RIB40 : AO090003000788, <i>A. brasiliensis</i> : Aspbr1_0038368, <i>Aspergillus flavus</i> NRRL 3357 : AFL2T_02231 and <i>A. acidus</i> : Aspfo1_0204450                                       | n/a                    | An02g08170 |
| An02g08180      | 11             | 195           |            | Domain(s) with predicted transmembrane transporter activity, role in transmembrane transport and integral to membrane localization                                                                                          | n/a                    | An02g08180 |
| An02g08190      | 10             | 599           |            | Ortholog of <i>A. brasiliensis</i> : Aspbr1_0389534 and <i>A. acidus</i> : Aspfo1_0493055                                                                                                                                   | n/a                    | An02g08190 |
| An02g08200      | 9              | 660           |            | Domain(s) with predicted nucleotide binding activity                                                                                                                                                                        | n/a                    | An02g08200 |
| An02g08210      | 8              | 2228          |            | Ortholog of <i>A. nidulans</i> FGSC A4 : AN3356, AN0718, AN5052, <i>A. fumigatus</i> Af293 : Afu1g14460, Afu3g01980, Afu3g12180, Afu8g06010 and <i>A. niger</i> CBS 513.88 : An14g06110, An02g00290, An02g13100, An06g00330 | prot_ID_384            | An02g08210 |
| An02g08220      | 7              | 211           |            | Domain(s) with predicted catalytic activity and role in metabolic process                                                                                                                                                   | prot_ID_1059           | An02g08220 |
| An02g08230      | 6              | 2168          |            | Domain(s) with predicted substrate-specific transmembrane transporter activity, role in transmembrane transport and integral to membrane localization                                                                       | prot_ID_600            | An02g08230 |
| An02g08240      | 5              | 65            |            |                                                                                                                                                                                                                             | prot_ID_12             | An02g08240 |
| An02g08250      | 4              | 705           |            | Domain(s) with predicted cation transmembrane transporter activity, role in cation transport, transmembrane transport and integral to membrane localization                                                                 | prot_ID_1056           | An02g08250 |
| An02g08260      | 3              | 883           |            | Domain(s) with predicted sequence-specific DNA binding, sequence-specific DNA binding transcription factor activity, role in regulation of transcription, DNA-dependent and nucleus localization                            | prot_ID_334            | An02g08260 |
| An02g08270      | 2              | 989           |            | Domain(s) with predicted oxidoreductase activity and role in oxidation-reduction process                                                                                                                                    | prot_ID_961            | An02g08270 |

|                   |    |      |                                                                                                                                                                                                                      |                    |                   |     |
|-------------------|----|------|----------------------------------------------------------------------------------------------------------------------------------------------------------------------------------------------------------------------|--------------------|-------------------|-----|
| An02g08280        | 1  | 2921 | Ortholog of A. nidulans FGSC A4 : AN5026, A. fumigatus Af293 : Afu3g12140, A. oryzae RIB40 : AO090003000774, A. niger ATCC 1015 : 37144-mRNA and A. versicolor : Aspve1_0051511                                      | prot_ID_856        | An02g08280        |     |
| <b>An02g08290</b> | 0  | 0    | <b>Ortholog(s) have role in pseurotin A biosynthetic process</b><br>Protein of unknown function; induced by growth on starch and lactate; expression repressed by tunicamycin and DTT                                | <b>prot_ID_442</b> | <b>An02g08290</b> | ECS |
| An02g08300        | -1 | 758  | Domain(s) with predicted nucleotide binding, oxidoreductase activity, transferase activity, transferring acyl groups other than amino-acyl groups, zinc ion binding activity and role in oxidation-reduction process | prot_ID_816        | An02g08300        |     |
| An02g08310        | -2 | 150  |                                                                                                                                                                                                                      | prot_ID_379        | An02g08310        | ECS |
| An02g08320        | -3 | 449  |                                                                                                                                                                                                                      | prot_ID_194        | An02g08320        |     |
| An02g08330        | -4 | 616  | Protein of unknown function; expression repressed by tunicamycin and DTT                                                                                                                                             | prot_ID_1260       | An02g08330        |     |
| An02g08340        | -5 | 779  | Domain(s) with predicted amino acid transmembrane transporter activity, role in amino acid transmembrane transport and membrane localization                                                                         | prot_ID_501        | An02g08340        |     |
| An02g08350        | -6 | 406  | Ortholog of A. nidulans FGSC A4 : AN8916, A. niger CBS 513.88 : An16g00980, A. niger ATCC 1015 : 41387-mRNA and A. versicolor : Aspve1_0088608                                                                       | prot_ID_1366       | An02g08350        |     |
| An02g08360        | -7 | 390  |                                                                                                                                                                                                                      | prot_ID_1252       | An02g08360        |     |
| An02g08370        | -8 | 616  | Domain(s) with predicted oxidoreductase activity and role in oxidation-reduction process                                                                                                                             | prot_ID_1230       | An02g08370        |     |
| n/a               |    |      | Has domain(s) with predicted guanyl-nucleotide exchange factor activity, role in regulation of small GTPase mediated signal transduction, small GTPase mediated signal transduction and intracellular localization   | prot_ID_1138       | An02g08380        |     |

## An02g09430 cluster

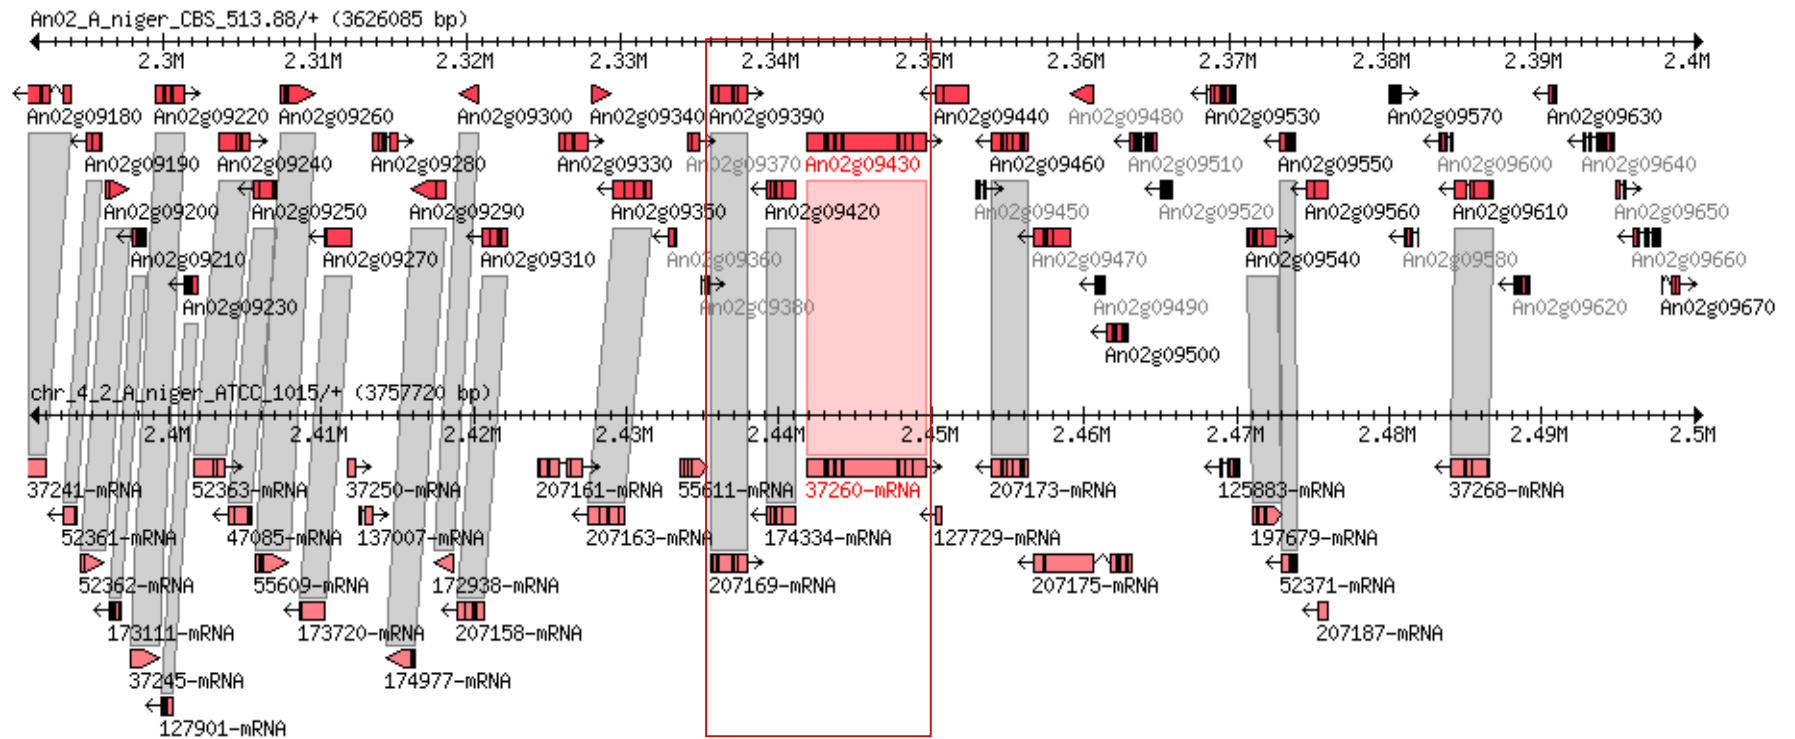

**An02g09430 cluster**

| Gene id (SMURF)   | Gene positions | Gene distance | AspGD name | AspGD description line or supplemental annotation                                                                                                                                                                                          | protein ID (antiSMASH) | AspGD ID          |     |
|-------------------|----------------|---------------|------------|--------------------------------------------------------------------------------------------------------------------------------------------------------------------------------------------------------------------------------------------|------------------------|-------------------|-----|
| n/a               |                |               |            | Has domain(s) with predicted membrane localization                                                                                                                                                                                         | prot_ID_504            | An02g09310        |     |
| n/a               |                |               |            | Ortholog of A. fumigatus Af293 : Afu3g13460, A. oryzae RIB40 : AO090012000779, N. fischeri NRRL 181 : NFIA_063890, Aspergillus flavus NRRL 3357 : AFL2T_03643 and A. clavatus NRRL 1 : ACLA_041690                                         | prot_ID_1095           | An02g09330        |     |
| n/a               |                |               |            | Ortholog of A. nidulans FGSC A4 : AN3158, A. fumigatus Af293 : Afu3g13465, N. fischeri NRRL 181 : NFIA_063880, Aspergillus flavus NRRL 3357 : AFL2T_03645 and A. clavatus NRRL 1 : ACLA_041680                                             | prot_ID_73             | An02g09340        |     |
| n/a               |                |               |            | Has domain(s) with predicted transporter activity, role in transmembrane transport and integral to membrane localization                                                                                                                   | prot_ID_49             | An02g09350        |     |
| n/a               |                |               |            |                                                                                                                                                                                                                                            | prot_ID_76             | An02g09360        |     |
| n/a               |                |               |            | Has domain(s) with predicted translation initiation factor activity, role in translation and eukaryotic translation initiation factor 2 complex localization                                                                               | prot_ID_374            | An02g09370        |     |
| n/a               |                |               |            |                                                                                                                                                                                                                                            | prot_ID_1197           | An02g09380        |     |
| n/a               |                |               | yvc1       | Calcium activated cation channel with a predicted role in cellular cation homeostasis                                                                                                                                                      | prot_ID_1237           | An02g09390        | ECS |
|                   |                |               |            | Domain(s) with predicted electron carrier activity, heme binding, iron ion binding, oxidoreductase activity, acting on paired donors, with incorporation or reduction of molecular oxygen activity and role in oxidation-reduction process |                        |                   |     |
| An02g09420        | 1              | 785           |            | Domain(s) with predicted ACP phosphopantetheine attachment site binding involved in fatty acid biosynthetic process, nucleotide binding, oxidoreductase activity and transferase activity, more                                            | prot_ID_1064           | An02g09420        |     |
| <b>An02g09430</b> | <b>0</b>       | <b>0</b>      |            | Ortholog of A. fumigatus Af293 : Afu3g02830, Afu8g02140, A. niger CBS 513.88 : An10g00890, An04g07720, A. oryzae RIB40 : AO090011000172, AO090023000667 and Neosartorya fischeri NRRL 181 : NFIA_001120                                    | <b>prot_ID_507</b>     | <b>An02g09430</b> | ECS |
| An02g09440        | -1             | 631           |            |                                                                                                                                                                                                                                            | prot_ID_646            | An02g09440        |     |
| An02g09450        | -2             | 541           |            |                                                                                                                                                                                                                                            | prot_ID_866            | An02g09450        |     |
| n/a               |                |               |            | Has domain(s) with predicted zinc ion binding activity and intracellular localization                                                                                                                                                      | prot_ID_232            | An02g09460        |     |
| n/a               |                |               |            | Potassium- or calcium-transporting ATPase                                                                                                                                                                                                  | prot_ID_503            | An02g09470        |     |
| n/a               |                |               |            | Potassium-transporting ATPase                                                                                                                                                                                                              | prot_ID_1382           | An02g09480        |     |

|     |                                                                                                                                                                                                                          |              |            |
|-----|--------------------------------------------------------------------------------------------------------------------------------------------------------------------------------------------------------------------------|--------------|------------|
| n/a |                                                                                                                                                                                                                          | prot_ID_542  | An02g09490 |
|     | Ortholog of <i>A. nidulans</i> FGSC A4 : AN10357, <i>A. fumigatus</i> Af293 : Afu2g15440, Afu3g13810, <i>A. oryzae</i> RIB40 : AO090012000774, AO090005001100 and <i>N. fischeri</i> NRRL 181 : NFIA_063450, NFIA_090680 |              |            |
| n/a |                                                                                                                                                                                                                          | prot_ID_1244 | An02g09500 |
| n/a |                                                                                                                                                                                                                          | prot_ID_1457 | An02g09510 |
| n/a |                                                                                                                                                                                                                          | prot_ID_1136 | An02g09520 |
|     | Protein with similarity to integral membrane protein Pth11 of <i>Magnaporthe grisea</i>                                                                                                                                  |              |            |
| n/a |                                                                                                                                                                                                                          | prot_ID_765  | An02g09530 |

## An02g10140 cluster

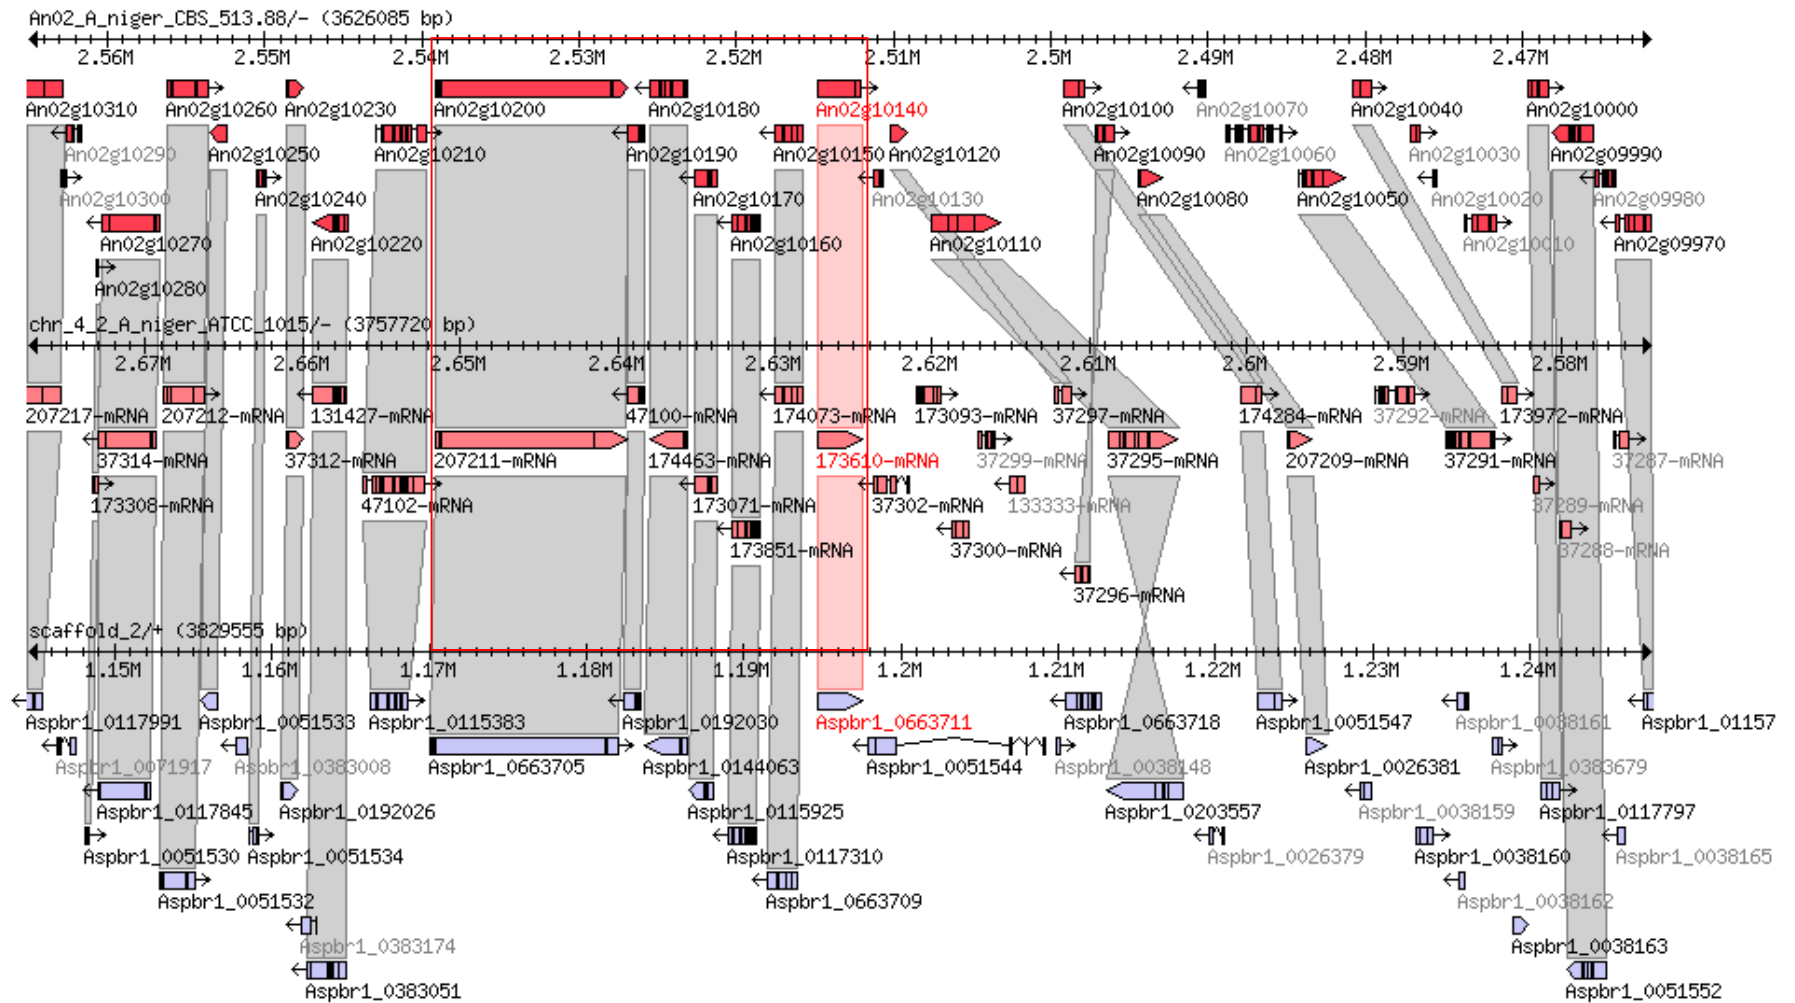



**An02g10140 cluster**

| Gene id (SMURF)   | Gene positions | Gene distance | AspGD name | AspGD description line or supplemental annotation                                                                                                                                                                                              | protein ID (antiSMASH) | AspGD ID          |     |
|-------------------|----------------|---------------|------------|------------------------------------------------------------------------------------------------------------------------------------------------------------------------------------------------------------------------------------------------|------------------------|-------------------|-----|
| n/a               |                |               |            | Has domain(s) with predicted electron carrier activity, heme binding, iron ion binding, oxidoreductase activity, acting on paired donors, with incorporation or reduction of molecular oxygen activity and role in oxidation-reduction process | prot_ID_1469           | An02g10080        |     |
| n/a               |                |               |            | Ortholog of A. niger CBS 513.88 : An08g08360, A. oryzae RIB40 : AO090003001172, A. versicolor : Aspve1_0147312, A. sydowii : Aspsy1_0086600 and Aspergillus terreus NIH2624 : ATET_09649                                                       | prot_ID_1360           | An02g10090        |     |
| n/a               |                |               |            | Ortholog of A. nidulans FGSC A4 : AN8003, A. fumigatus Af293 : Afu5g02600, A. niger ATCC 1015 : 174284-mRNA, A. versicolor : Aspve1_0045487 and A. sydowii : Aspsy1_0033725                                                                    | prot_ID_116            | An02g10100        |     |
| An02g10110        | 3              | 1516          |            | Domain(s) with predicted ATP binding, ATPase activity, coupled to transmembrane movement of substances activity, role in transmembrane transport and integral to membrane localization                                                         | prot_ID_351            | An02g10110        |     |
| An02g10120        | 2              | 518           |            | Domain(s) with predicted ATP binding, protein kinase activity and role in protein phosphorylation                                                                                                                                              | prot_ID_38             | An02g10120        |     |
| An02g10130        | 1              | 791           |            | Protein of unknown function                                                                                                                                                                                                                    | prot_ID_822            | An02g10130        |     |
| <b>An02g10140</b> | 0              | 0             |            | <b>NRPS-like protein similar to nonribosomal peptide synthase</b>                                                                                                                                                                              | <b>prot_ID_981</b>     | <b>An02g10140</b> | ECS |
| An02g10150        | -1             | 940           |            | Domain(s) with predicted catalytic activity and role in metabolic process                                                                                                                                                                      | prot_ID_1405           | An02g10150        |     |
| An02g10160        | -2             | 841           |            | Domain(s) with predicted pyridoxal phosphate binding, transferase activity, transferring nitrogenous groups activity and role in biosynthetic process                                                                                          | prot_ID_1420           | An02g10160        |     |
| An02g10170        | -3             | 945           |            | Domain(s) with predicted role in transmembrane transport and integral to membrane localization                                                                                                                                                 | prot_ID_582            | An02g10170        |     |
| n/a               |                |               |            | Ortholog of A. nidulans FGSC A4 : AN8002, A. fumigatus Af293 : Afu5g02590, A. oryzae RIB40 : AO090102000374, A. niger ATCC 1015 : 174463-mRNA and A. versicolor : Aspve1_0139493                                                               | prot_ID_294            | An02g10180        |     |
| n/a               |                |               |            | Ortholog of A. nidulans FGSC A4 : AN8001, A. oryzae RIB40 : AO090102000373, A. niger ATCC 1015 : 47100-mRNA, A. versicolor : Aspve1_0199673 and A. sydowii : Aspsy1_0059921                                                                    | prot_ID_964            | An02g10190        |     |
| n/a               |                |               |            | Has domain(s) with predicted phosphotransferase activity, alcohol group as acceptor activity                                                                                                                                                   | prot_ID_1353           | An02g10200        | FA  |

n/a

Domain(s) with predicted protein phosphatase type 2A regulator activity, role in signal transduction and protein phosphatase type 2A complex localization

n/a

An02g10210

## An02g14220 cluster

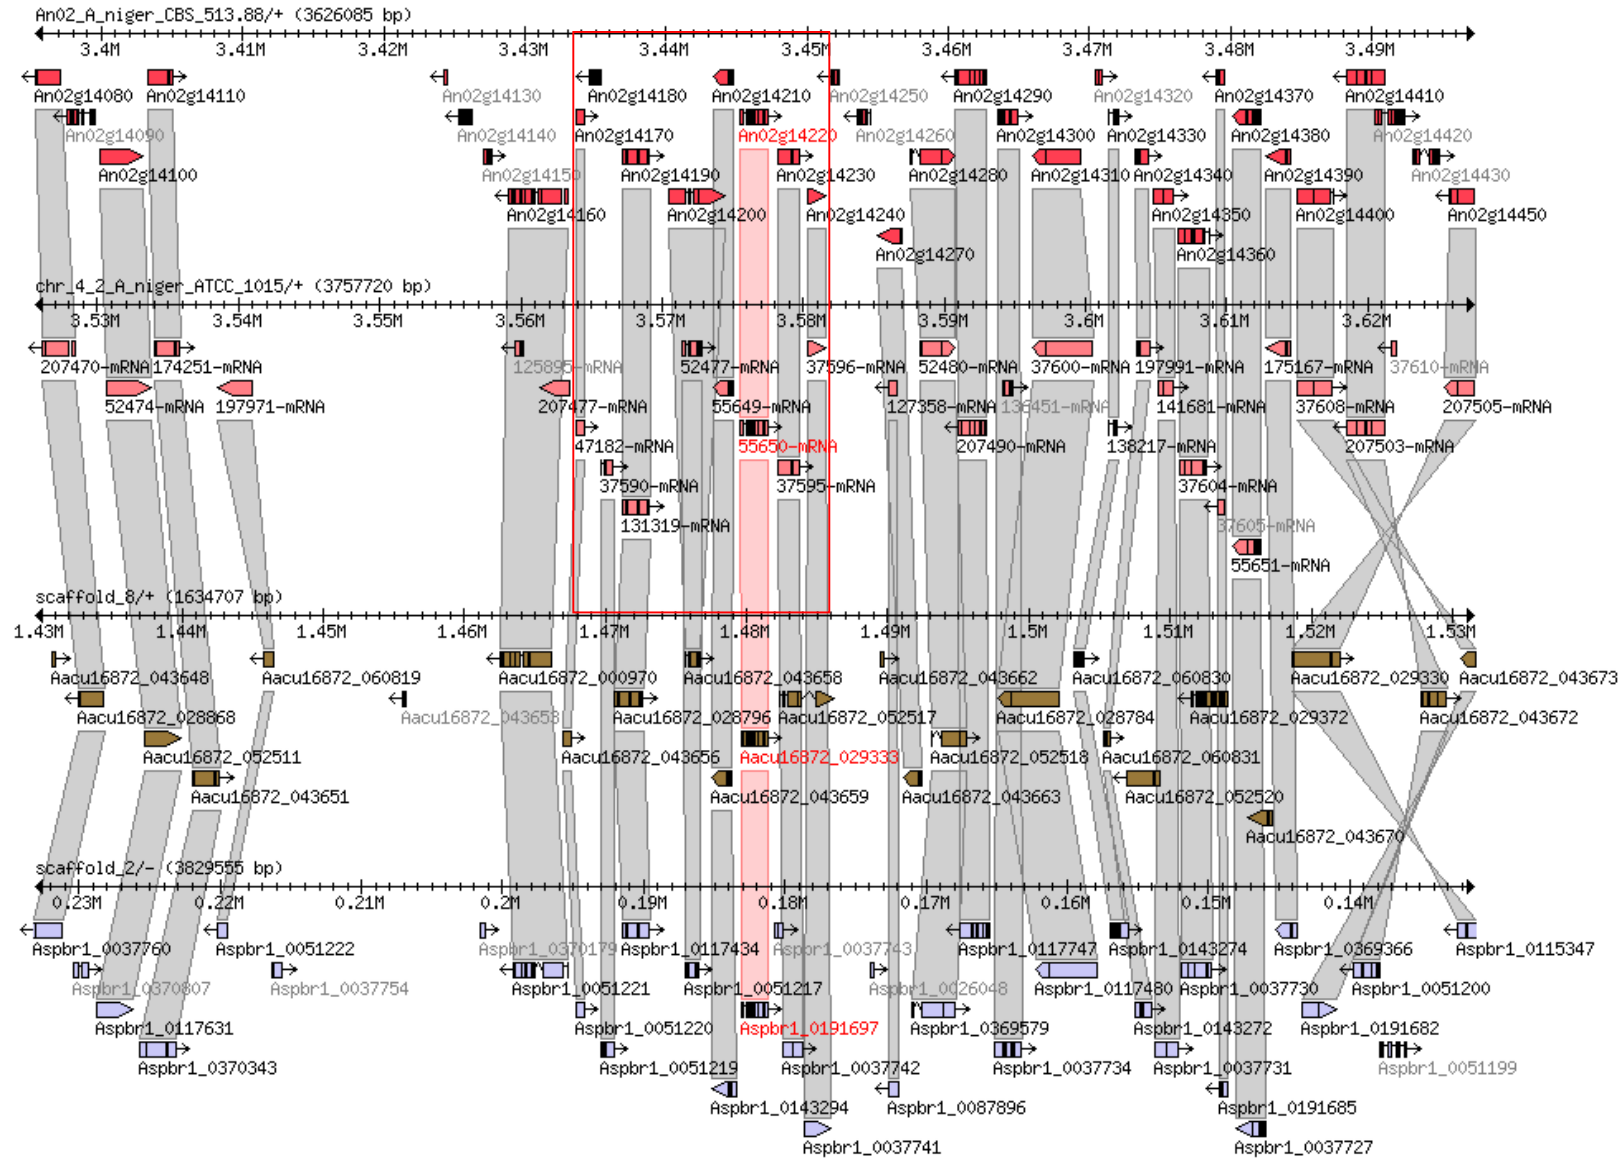

**An02g14220 cluster**

| Gene id (SMURF)   | Gene positions | Gene distance | AspGD name | AspGD description line or supplemental annotation                                                                                                                                                                                                                    | protein ID (antiSMASH) | AspGD ID          |     |
|-------------------|----------------|---------------|------------|----------------------------------------------------------------------------------------------------------------------------------------------------------------------------------------------------------------------------------------------------------------------|------------------------|-------------------|-----|
| n/a               |                |               |            | Ortholog of <i>A. nidulans</i> FGSC A4 : AN7484, <i>A. fumigatus</i> Af293 : Afu2g05720, <i>A. oryzae</i> RIB40 : AO090001000689, <i>A. niger</i> ATCC 1015 : 47182-mRNA and <i>Aspergillus versicolor</i> : Aspve1_0085916                                          | n/a                    | An02g14170        | ECS |
| n/a               |                |               |            | Ortholog of <i>Aspergillus acidus</i> : Aspfo1_0057707                                                                                                                                                                                                               | n/a                    | An02g14180        |     |
| An02g14190        | 3              | 2426          |            | Domain(s) with predicted role in transmembrane transport and integral to membrane localization                                                                                                                                                                       | n/a                    | An02g14190        |     |
| An02g14200        | 2              | 1044          | cftA       | Rho GTPase                                                                                                                                                                                                                                                           | n/a                    | An02g14200        |     |
| An02g14210        | 1              | 575           |            | Domain(s) with predicted hydrolase activity, acting on carbon-nitrogen (but not peptide) bonds, in linear amidines, metal ion binding activity                                                                                                                       | n/a                    | An02g14210        |     |
| <b>An02g14220</b> | 0              | 0             |            | 3-oxoacyl-[acyl-carrier protein] synthase<br>Ortholog of <i>A. nidulans</i> FGSC A4 : AN11747, <i>A. fumigatus</i> Af293 : Afu2g05770, <i>A. brasiliensis</i> : Aspbr1_0037742, <i>A. niger</i> ATCC 1015 : 37595-mRNA and <i>N. fischeri</i> NRRL 181 : NFIA_082490 | n/a                    | <b>An02g14220</b> |     |
| An02g14230        | -1             | 712           |            | Domain(s) with predicted mRNA guanylyltransferase activity, role in 7-methylguanosine mRNA capping and mRNA cap methyltransferase complex localization                                                                                                               | n/a                    | An02g14230        |     |
| An02g14240        | -2             | 669           |            | Domain(s) with predicted mRNA guanylyltransferase activity, role in 7-methylguanosine mRNA capping and mRNA cap methyltransferase complex localization                                                                                                               | n/a                    | An02g14240        | ECS |

## An03g00650 cluster

No ATCC 1015 matching cluster; no manual prediction made

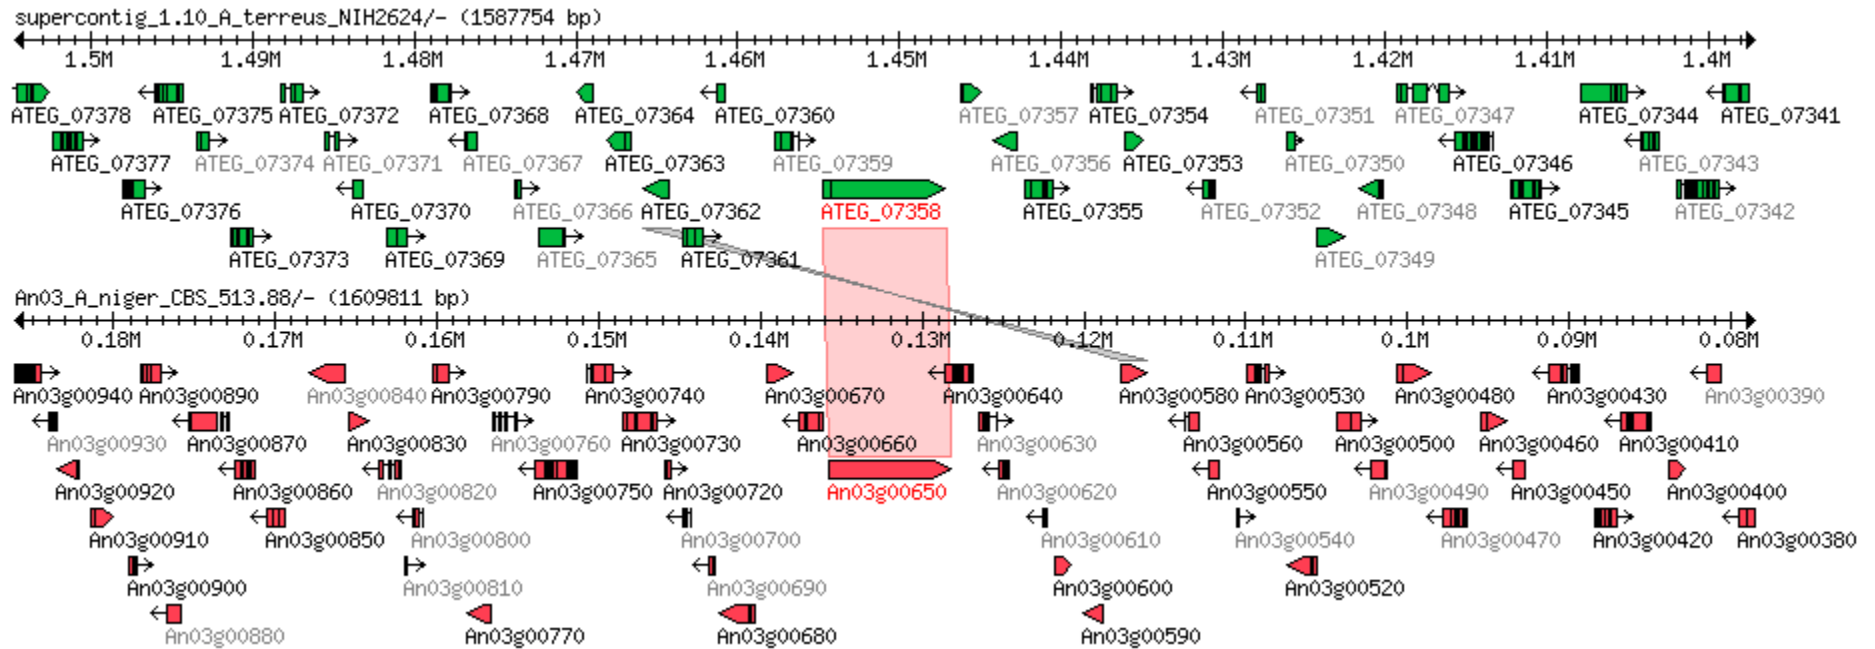

**An03g00650 cluster**

| Gene id (SMURF)   | Gene positions | Gene distance | AspGD name | AspGD description line or supplemental annotation                                                                                                                                                                                          | protein ID (antiSMASH) | AspGD ID          |
|-------------------|----------------|---------------|------------|--------------------------------------------------------------------------------------------------------------------------------------------------------------------------------------------------------------------------------------------|------------------------|-------------------|
| n/a               |                |               |            | Salicylate hydroxylase with a predicted role in salicylic acid degradation                                                                                                                                                                 | prot_ID_86             | An03g00530        |
| n/a               |                |               |            |                                                                                                                                                                                                                                            | prot_ID_297            | An03g00540        |
| n/a               |                |               |            | Ortholog of <i>A. brasiliensis</i> : Aspbr1_0059969 and <i>A. acidus</i> : Aspfo1_0205058                                                                                                                                                  | prot_ID_473            | An03g00550        |
| n/a               |                |               |            | Ortholog of <i>A. nidulans</i> FGSC A4 : AN2026, <i>A. fumigatus</i> Af293 : Afu2g00850, <i>A. oryzae</i> RIB40 : AO090012000015 and <i>A. brasiliensis</i> : Aspbr1_0049054, Aspbr1_0138565                                               | prot_ID_365            | An03g00560        |
| An03g00580        | 7              | 1158          |            | Domain(s) with predicted electron carrier activity, heme binding, iron ion binding, oxidoreductase activity, acting on paired donors, with incorporation or reduction of molecular oxygen activity and role in oxidation-reduction process | prot_ID_45             | An03g00580        |
| An03g00590        | 6              | 787           |            | Domain(s) with predicted trichodiene synthase activity and role in sesquiterpenoid biosynthetic process                                                                                                                                    | prot_ID_341            | An03g00590        |
| An03g00600        | 5              | 473           |            | Domain(s) with predicted ATP binding, protein kinase activity and role in protein phosphorylation                                                                                                                                          | prot_ID_274            | An03g00600        |
| An03g00610        | 4              | 2045          |            |                                                                                                                                                                                                                                            | prot_ID_635            | An03g00610        |
| An03g00620        | 3              | 60            |            |                                                                                                                                                                                                                                            | prot_ID_618            | An03g00620        |
| An03g00630        | 2              | 378           |            |                                                                                                                                                                                                                                            | prot_ID_175            | An03g00630        |
| An03g00640        | 1              | 256           |            | Ortholog of <i>A. fumigatus</i> Af293 : Afu2g17790, <i>A. brasiliensis</i> : Aspbr1_0032979, <i>N. fischeri</i> NRRL 181 : NFIA_093190, <i>A. acidus</i> : Aspfo1_0058754 and <i>A. fumigatus</i> A1163 : AFUB_033460                      | prot_ID_434            | An03g00640        |
| <b>An03g00650</b> | 0              | 0             |            | Putative nonribosomal peptide synthase (NRPS)                                                                                                                                                                                              | <b>prot_ID_648</b>     | <b>An03g00650</b> |
| An03g00660        | -1             | 494           | tauD       | Taurine dioxygenase                                                                                                                                                                                                                        | prot_ID_429            | An03g00660        |
| An03g00670        | -2             | 918           |            | Domain(s) with predicted NAD binding, oxidoreductase activity, acting on the CH-OH group of donors, NAD or NADP as acceptor activity and role in glycerol-3-phosphate catabolic process, oxidation-reduction process                       | prot_ID_171            | An03g00670        |
| An03g00680        | -3             | 823           |            | Domain(s) with predicted role in transmembrane transport and integral to membrane localization                                                                                                                                             | prot_ID_153            | An03g00680        |
| An03g00690        | -4             | 609           |            |                                                                                                                                                                                                                                            | prot_ID_35             | An03g00690        |
| An03g00700        | -5             | 1238          |            |                                                                                                                                                                                                                                            | prot_ID_352            | An03g00700        |
| An03g00720        | -6             | 837           |            | Protein of unknown function; expression induced by tunicamycin and DTT                                                                                                                                                                     | prot_ID_321            | An03g00720        |
| An03g00730        | -7             | 466           |            | Amine oxidase                                                                                                                                                                                                                              | prot_ID_144            | An03g00730        |

|            |     |      |                                                                                                                                                                                                             |             |            |
|------------|-----|------|-------------------------------------------------------------------------------------------------------------------------------------------------------------------------------------------------------------|-------------|------------|
| An03g00740 | -8  | 420  | Domain(s) with predicted mannan endo-1,6-alpha-mannosidase activity and role in carbohydrate catabolic process                                                                                              | prot_ID_233 | An03g00740 |
| An03g00750 | -9  | 393  | Domain(s) with predicted DNA binding, sequence-specific DNA binding RNA polymerase II transcription factor activity, sequence-specific DNA binding transcription factor activity, zinc ion binding activity | prot_ID_315 | An03g00750 |
| An03g00760 | -10 | 1156 |                                                                                                                                                                                                             | prot_ID_471 | An03g00760 |
| An03g00770 | -11 | 329  | Protein similar to allergic allergen rAsp f 4 of <i>A. fumigatus</i> ; expression repressed by tunicamycin and DTT                                                                                          | n/a         | An03g00770 |
| An03g00790 | -12 | 1669 | Domain(s) with predicted RNA binding, ribonuclease III activity and role in RNA processing                                                                                                                  | n/a         | An03g00790 |

## An03g01820 cluster

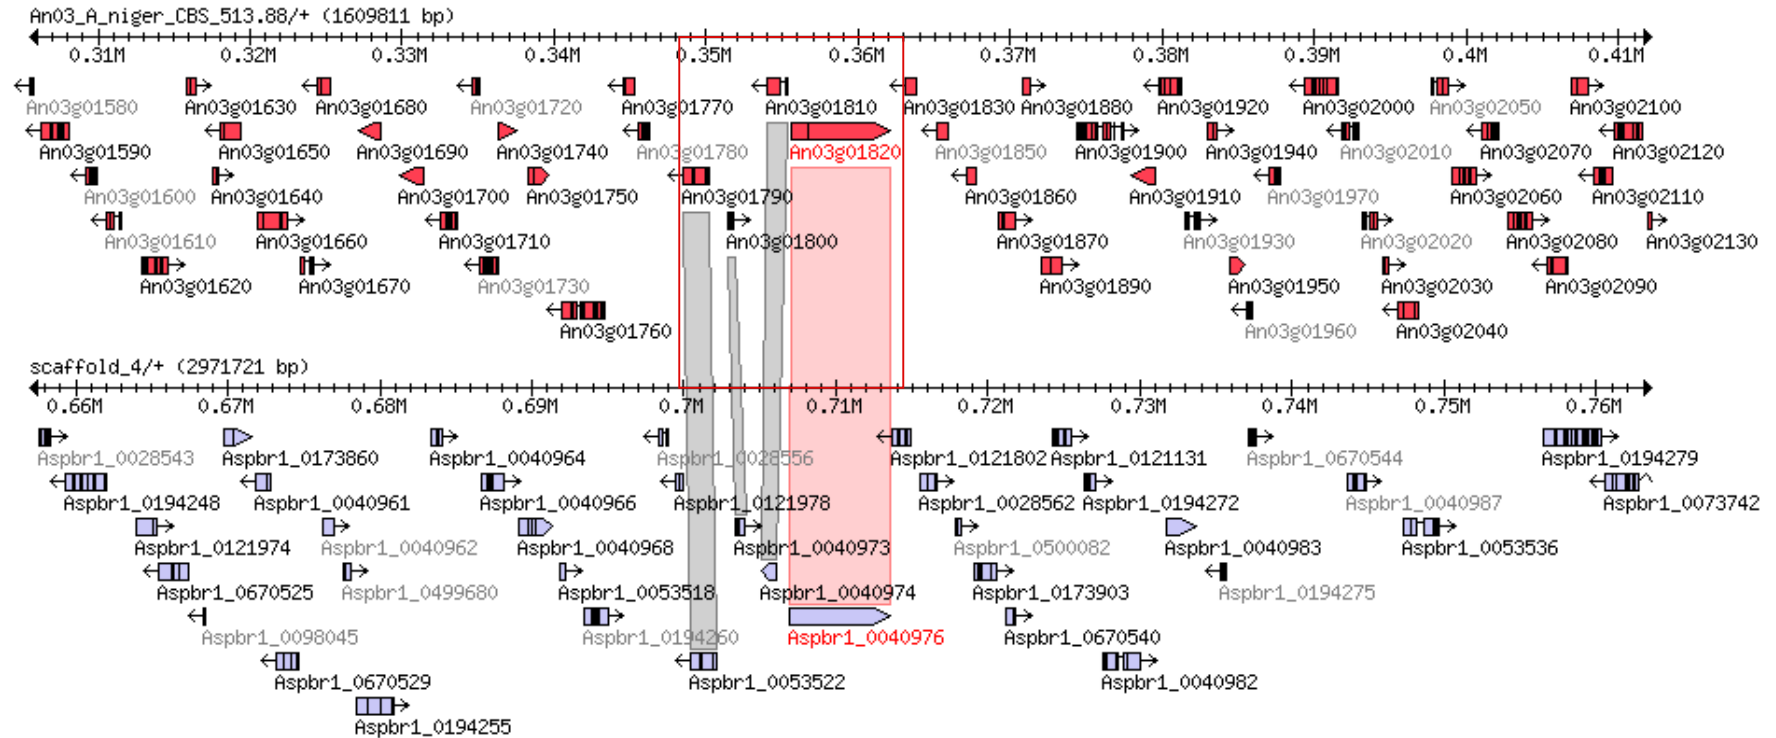



**An03g01820 cluster**

| Gene id (SMURF)   | Gene positions | Gene distance | AspGD name | AspGD description line or supplemental annotation                                                                                                                                                                      | protein ID (antiSMASH) | AspGD ID          |     |
|-------------------|----------------|---------------|------------|------------------------------------------------------------------------------------------------------------------------------------------------------------------------------------------------------------------------|------------------------|-------------------|-----|
| n/a               |                |               |            |                                                                                                                                                                                                                        | prot_ID_150            | An03g01730        |     |
| n/a               |                |               |            | Ortholog of A. nidulans FGSC A4 : AN2836, A. niger CBS 513.88 : An16g00290, A. brasiliensis : Aspbr1_0043644, Aspbr1_0049046, Aspbr1_0132878 and A. niger ATCC 1015 : 141246-mRNA, 45726-mRNA                          | prot_ID_169            | An03g01740        |     |
| An03g01750        | 7              | 677           |            | Domain(s) with predicted substrate-specific transmembrane transporter activity, role in transmembrane transport and integral to membrane localization                                                                  | prot_ID_370            | An03g01750        |     |
| An03g01760        | 6              | 1264          |            | Domain(s) with predicted DNA binding, sequence-specific DNA binding RNA polymerase II transcription factor activity, sequence-specific DNA binding transcription factor activity, zinc ion binding activity            | prot_ID_474            | An03g01760        |     |
| An03g01770        | 5              | 346           |            | Ortholog of A. nidulans FGSC A4 : AN7941, A. fumigatus Af293 : Afu2g12680, Afu7g00370, A. niger ATCC 1015 : 214657-mRNA, A. versicolor : Aspve1_0045447 and A. sydowii : Aspsy1_0156290                                | prot_ID_257            | An03g01770        |     |
| An03g01780        | 4              | 2225          |            |                                                                                                                                                                                                                        | prot_ID_174            | An03g01780        |     |
| An03g01790        | 3              | 1239          |            | Domain(s) with predicted role in transmembrane transport and integral to membrane localization                                                                                                                         | prot_ID_219            | An03g01790        | ECS |
| An03g01800        | 2              | 2120          |            | Ortholog(s) have long-chain fatty acid transporter activity, role in chronological cell aging, fatty acid metabolic process, long-chain fatty acid transport and cytoplasm, extracellular region, nucleus localization | prot_ID_572            | An03g01800        |     |
| An03g01810        | 1              | 325           |            | Ortholog(s) have role in asperfuranone biosynthetic process, secondary metabolic process                                                                                                                               | prot_ID_573            | An03g01810        |     |
| <b>An03g01820</b> | 0              | 0             |            | Putative melanin polyketide synthase                                                                                                                                                                                   | <b>prot_ID_420</b>     | <b>An03g01820</b> | ECS |
| An03g01830        | -1             | 968           |            | Ortholog of A. niger CBS 513.88 : An12g05420, An01g01650, A. oryzae RIB40 : AO090701000546, AO090001000314, A. niger ATCC 1015 : 45719-mRNA, 53991-mRNA and A. versicolor : Aspve1_0041648                             | prot_ID_661            | An03g01830        |     |
| An03g01850        | -2             | 1265          |            |                                                                                                                                                                                                                        | prot_ID_428            | An03g01850        |     |
| n/a               |                |               |            | Has domain(s) with predicted catalytic activity and role in metabolic process                                                                                                                                          | prot_ID_633            | An03g01860        |     |
| n/a               |                |               |            | Ortholog of A. fumigatus Af293 : Afu5g08440, N. fischeri NRRL 181 : NFIA_078840, A. acidus : Aspfo1_0084088, A. fumigatus A1163 : AFUB_055980 and A. niger ATCC 1015 : 194089-mRNA                                     | prot_ID_318            | An03g01870        |     |

|     |                                                                                                                                                                                                                    |             |            |
|-----|--------------------------------------------------------------------------------------------------------------------------------------------------------------------------------------------------------------------|-------------|------------|
| n/a | Has domain(s) with predicted acid-amino acid ligase activity and role in post-translational protein modification                                                                                                   | prot_ID_408 | An03g01880 |
| n/a | Ortholog of <i>A. nidulans</i> FGSC A4 : AN2041, <i>A. niger</i> CBS 513.88 : An16g01460, An16g06600, An11g04970, <i>A. oryzae</i> RIB40 : AO090026000564 and <i>A. niger</i> ATCC 1015 : 39078-mRNA, 41348-mRNA   | prot_ID_659 | An03g01890 |
| n/a | Ortholog of <i>A. niger</i> ATCC 1015 : 45714-mRNA                                                                                                                                                                 | prot_ID_368 | An03g01900 |
| n/a | Acetylglutamate kinase<br>Ortholog of <i>A. nidulans</i> FGSC A4 : AN10915, <i>A. niger</i> CBS 513.88 : An04g09630, <i>A. niger</i> ATCC 1015 : 195107-mRNA, 45712-mRNA and <i>A. versicolor</i> : Aspve1_0513563 | prot_ID_65  | An03g01910 |
| n/a |                                                                                                                                                                                                                    | prot_ID_143 | An03g01920 |
| n/a |                                                                                                                                                                                                                    | prot_ID_423 | An03g01930 |

# An03g03520 cluster

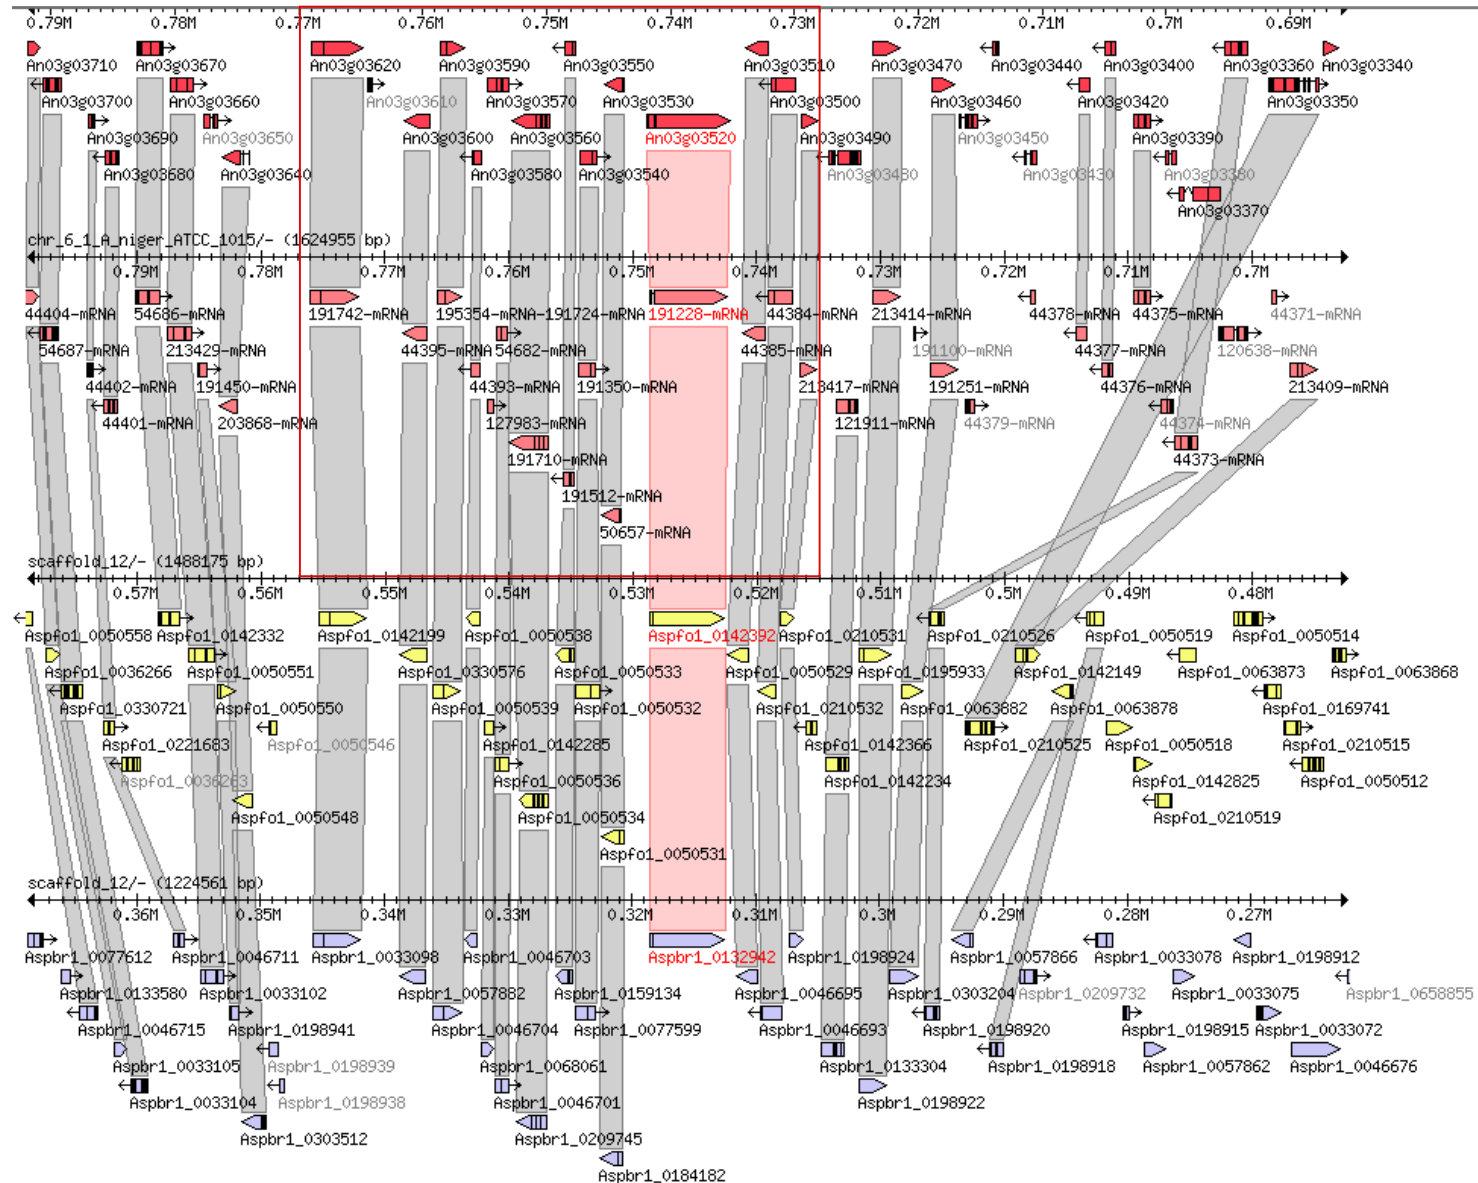

**An03g03520 cluster**

| Gene id (SMURF)   | Gene positions | Gene distance | AspGD name | AspGD description line or supplemental annotation                                                                                                                                                                          | protein ID (antiSMASH) | AspGD ID          |     |
|-------------------|----------------|---------------|------------|----------------------------------------------------------------------------------------------------------------------------------------------------------------------------------------------------------------------------|------------------------|-------------------|-----|
| An03g03380        | 13             | 1189          |            |                                                                                                                                                                                                                            | n/a                    | An03g03380        |     |
| An03g03390        | 12             | 1450          |            | Ortholog of A. niger CBS 513.88 : An09g01480, A. brasiliensis : Aspbr1_0131175, A. niger ATCC 1015 : 43480-mRNA, 44375-mRNA and Aspergillus carbonarius ITEM 5010 : Acar5010_135976                                        | n/a                    | An03g03390        |     |
| An03g03400        | 11             | 1224          |            | Ortholog of A. nidulans FGSC A4 : AN8462, A. niger CBS 513.88 : An09g01460, A. brasiliensis : Aspbr1_0131393, A. niger ATCC 1015 : 43481-mRNA, 44376-mRNA and A. acidus : Aspfo1_0194567                                   | n/a                    | An03g03400        |     |
| An03g03420        | 10             | 3372          |            | Domain(s) with predicted hydrolase activity                                                                                                                                                                                | n/a                    | An03g03420        |     |
| An03g03430        | 9              | 2152          |            |                                                                                                                                                                                                                            | n/a                    | An03g03430        |     |
| An03g03440        | 8              | 1221          |            | Ortholog of A. nidulans FGSC A4 : AN11871, A. fumigatus Af293 : Afu1g11260, Afu6g00270, A. niger CBS 513.88 : An04g04460 and A. niger ATCC 1015 : 190306-mRNA                                                              | n/a                    | An03g03440        |     |
| An03g03450        | 7              | 355           |            | Domain(s) with predicted nucleotide binding, oxidoreductase activity, zinc ion binding activity and role in oxidation-reduction process                                                                                    | prot_ID_333            | An03g03450        |     |
| An03g03460        | 6              | 2467          |            | Domain(s) with predicted D-arabinono-1,4-lactone oxidase activity, UDP-N-acetylmuramate dehydrogenase activity, flavin adenine dinucleotide binding activity and role in biosynthetic process, oxidation-reduction process | prot_ID_226            | An03g03460        |     |
| An03g03470        | 5              | 1061          |            | Domain(s) with predicted ATP binding, ATPase activity                                                                                                                                                                      | prot_ID_24             | An03g03470        |     |
| An03g03480        | 4              | 793           |            | Domain(s) with predicted NAD binding, oxidoreductase activity, acting on the CH-OH group of donors, NAD or NADP as acceptor activity and role in oxidation-reduction process                                               | prot_ID_116            | An03g03480        |     |
| An03g03490        | 3              | 649           |            | Ortholog of A. nidulans FGSC A4 : AN2888, A. fumigatus Af293 : Afu3g11580, A. oryzae RIB40 : AO090003000717, A. niger ATCC 1015 : 213417-mRNA and A. versicolor : Aspve1_0556144                                           | prot_ID_499            | An03g03490        | ECS |
| An03g03500        | 2              | 932           |            | Ortholog of A. nidulans FGSC A4 : AN4162, A. fumigatus Af293 : Afu4g13160, A. oryzae RIB40 : AO090009000265, A. niger ATCC 1015 : 44384-mRNA and A. versicolor : Aspve1_0086858                                            | prot_ID_574            | An03g03500        |     |
| An03g03510        | 1              | 1751          |            | Ortholog of A. nidulans FGSC A4 : AN6634, A. fumigatus Af293 : Afu6g03780, A. oryzae RIB40 : AO090701000171, A. niger ATCC 1015 : 44385-mRNA and A. versicolor : Aspve1_0044304                                            | prot_ID_187            | An03g03510        |     |
| <b>An03g03520</b> | 0              | 0             |            | Ortholog(s) have role in ergosterol biosynthetic process                                                                                                                                                                   | <b>prot_ID_302</b>     | <b>An03g03520</b> |     |

|            |     |      |                                                                                                                                                                                                                                             |             |            |          |
|------------|-----|------|---------------------------------------------------------------------------------------------------------------------------------------------------------------------------------------------------------------------------------------------|-------------|------------|----------|
| An03g03530 | -1  | 1908 | Ortholog of <i>A. nidulans</i> FGSC A4 : AN6239, AN6793, <i>A. fumigatus</i> Af293 : Afu3g03390, Afu7g00330, <i>A. oryzae</i> RIB40 : AO090103000170, AO090701000114 and <i>A. niger</i> ATCC 1015 : 50657-mRNA                             | prot_ID_136 | An03g03530 |          |
| An03g03540 | -2  | 844  | Ortholog(s) have role in ergosterol biosynthetic process, secondary metabolic process, siderophore biosynthetic process                                                                                                                     | prot_ID_75  | An03g03540 |          |
| An03g03550 | -3  | 373  | Ortholog(s) have role in N',N'',N'''-triacylfusarinine C biosynthetic process, cellular response to hydrogen peroxide, cellular response to iron ion starvation, ergosterol biosynthetic process, pathogenesis, secondary metabolic process | prot_ID_113 | An03g03550 |          |
| An03g03560 | -4  | 1262 | Ortholog(s) have role in ferric triacylfusarinine C transport                                                                                                                                                                               | prot_ID_340 | An03g03560 |          |
| An03g03570 | -5  | 1229 | Domain(s) with predicted N-methyltransferase activity, protein C-terminal S-isoprenylcysteine carboxyl O-methyltransferase activity and role in C-terminal protein methylation, phospholipid metabolic process                              | prot_ID_299 | An03g03570 |          |
| An03g03580 | -6  | 489  | Ortholog of <i>A. nidulans</i> FGSC A4 : AN7328, <i>A. fumigatus</i> Af293 : Afu2g16550, <i>A. oryzae</i> RIB40 : AO090102000183, <i>A. niger</i> ATCC 1015 : 44393-mRNA and <i>A. versicolor</i> : Aspve1_0050747                          | prot_ID_488 | An03g03580 |          |
| An03g03590 | -7  | 886  | Domain(s) with predicted N-acetyltransferase activity and role in metabolic process                                                                                                                                                         | prot_ID_602 | An03g03590 |          |
| An03g03600 | -8  | 886  | Domain(s) with predicted ATP binding, DNA binding, helicase activity                                                                                                                                                                        | prot_ID_581 | An03g03600 |          |
| An03g03610 | -9  | 2579 | Protein of unknown function                                                                                                                                                                                                                 | n/a         | An03g03610 |          |
| An03g03620 | -10 | 539  | Domain(s) with predicted ATP binding, ATPase activity, coupled to transmembrane movement of substances activity, role in transmembrane transport and integral to membrane localization                                                      | n/a         | An03g03620 | ECS, IGS |

## An03g05140 cluster

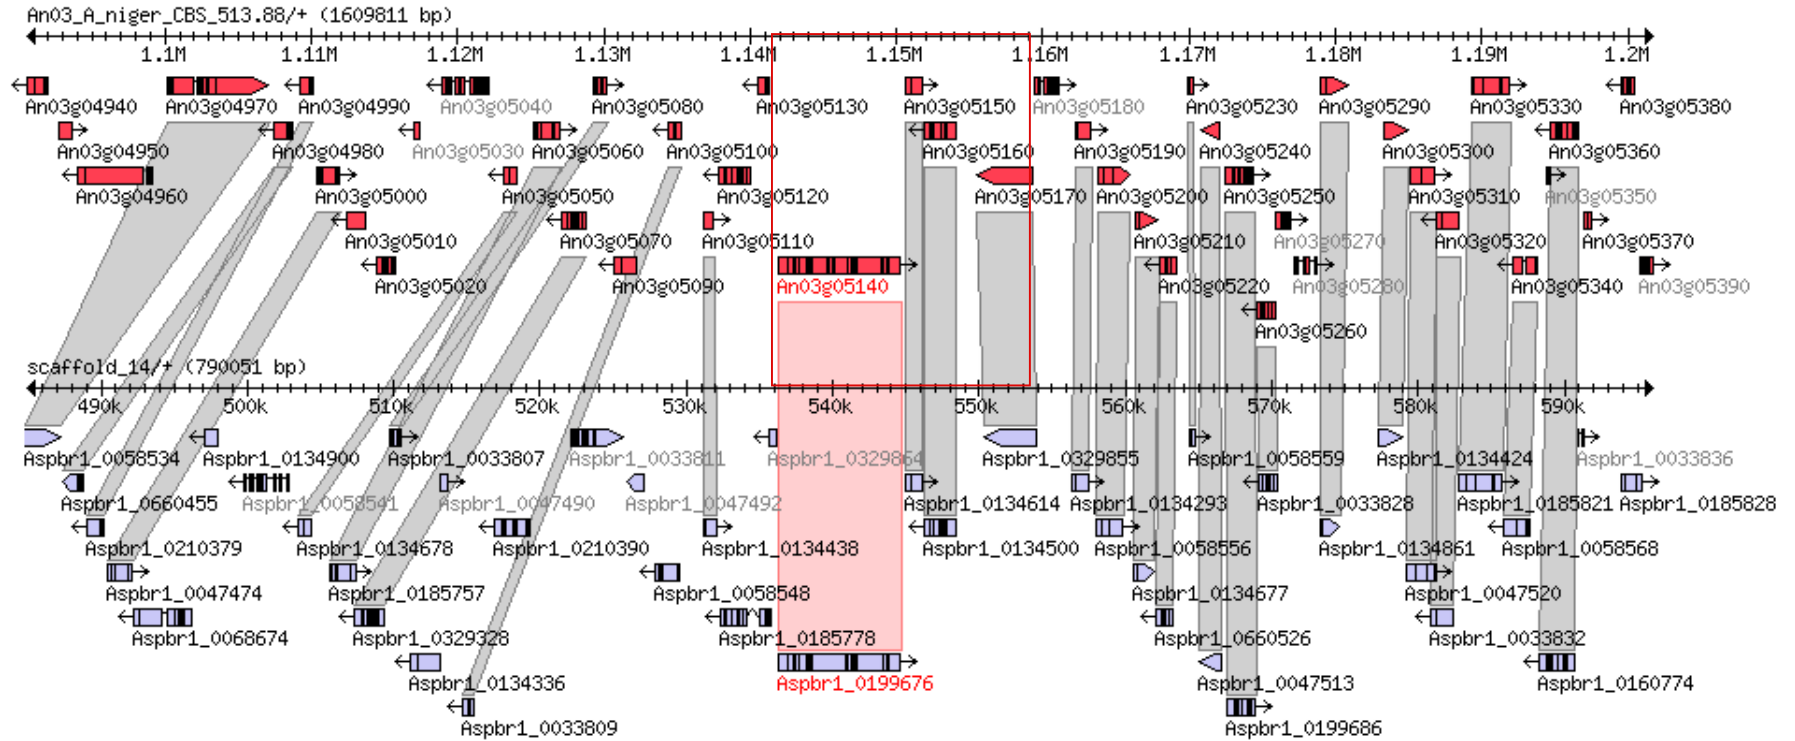

**An03g05140 cluster**

| Gene id (SMURF)   | Gene positions | Gene distance | AspGD name | AspGD description line or supplemental annotation                                                                                                                                                                                                                                                                                 | protein ID (antiSMASH) | AspGD ID          |     |
|-------------------|----------------|---------------|------------|-----------------------------------------------------------------------------------------------------------------------------------------------------------------------------------------------------------------------------------------------------------------------------------------------------------------------------------|------------------------|-------------------|-----|
| n/a               |                |               |            |                                                                                                                                                                                                                                                                                                                                   | prot_ID_105            | An03g05040        |     |
| An03g05050        | 9              | 1245          |            | Domain(s) with predicted adenosylhomocysteinase activity, nucleotide binding, oxidoreductase activity and role in oxidation-reduction process                                                                                                                                                                                     | prot_ID_639            | An03g05050        |     |
| An03g05060        | 8              | 153           |            | Domain(s) with predicted amino acid transmembrane transporter activity, role in amino acid transmembrane transport and integral to membrane localization                                                                                                                                                                          | prot_ID_339            | An03g05060        |     |
| An03g05070        | 7              | 444           |            | Domain(s) with predicted hydrolase activity, acting on carbon-nitrogen (but not peptide) bonds, in linear amidines, metal ion binding activity<br>Ortholog of A. nidulans FGSC A4 : AN7668, A. fumigatus Af293 : Afu2g01360, A. oryzae RIB40 : AO090701000421, A. niger ATCC 1015 : 50723-mRNA and A. versicolor : Aspve1_0172224 | prot_ID_663            | An03g05070        |     |
| An03g05080        | 6              | 582           |            |                                                                                                                                                                                                                                                                                                                                   | prot_ID_418            | An03g05080        |     |
| An03g05090        | 5              | 2099          |            | NAD kinase<br>Ortholog(s) have role in exonucleolytic trimming to generate mature 3'-end of 5.8S rRNA from tricistronic rRNA transcript (SSU-rRNA, 5.8S rRNA and LSU-rRNA), more                                                                                                                                                  | prot_ID_69             | An03g05090        |     |
| An03g05100        | 4              | 1522          |            | Ortholog of A. nidulans FGSC A4 : AN10993, A. fumigatus Af293 : Afu2g01310, A. oryzae RIB40 : AO090701000405, A. niger ATCC 1015 : 50726-mRNA and A. versicolor : Aspve1_0043704                                                                                                                                                  | prot_ID_266            | An03g05100        |     |
| An03g05110        | 3              | 278           |            |                                                                                                                                                                                                                                                                                                                                   | prot_ID_490            | An03g05110        |     |
| An03g05120        | 2              | 466           |            | Domain(s) with predicted role in transmembrane transport and integral to membrane localization<br>Ortholog of A. fumigatus Af293 : Afu2g01300, A. versicolor : Aspve1_0036298, A. sydowii : Aspsy1_0086510 and A. niger ATCC 1015 : 126782-mRNA, 126826-mRNA                                                                      | prot_ID_582            | An03g05120        |     |
| An03g05130        | 1              | 583           |            |                                                                                                                                                                                                                                                                                                                                   | prot_ID_160            | An03g05130        |     |
| <b>An03g05140</b> | 0              | 0             |            | <b>Putative polyketide synthase</b>                                                                                                                                                                                                                                                                                               | <b>prot_ID_506</b>     | <b>An03g05140</b> | ECS |
| An03g05150        | -1             | 269           |            | D-mandelate dehydrogenase with a predicted role in mandelate degradation<br>Domain(s) with predicted electron carrier activity, flavin adenine dinucleotide binding, iron ion binding, oxidoreductase activity, role in oxidation-reduction process and integral to membrane localization                                         | prot_ID_285            | An03g05150        |     |
| An03g05160        | -2             | 150           |            | Ortholog(s) have sterol response element binding, transcription regulatory region sequence-specific DNA binding activity                                                                                                                                                                                                          | prot_ID_619            | An03g05160        |     |
| An03g05170        | -3             | 2275          |            |                                                                                                                                                                                                                                                                                                                                   | prot_ID_657            | An03g05170        | ECS |
| An03g05180        | -4             | 184           |            | Protein of unknown function                                                                                                                                                                                                                                                                                                       | prot_ID_190            | An03g05180        |     |

|            |     |      |       |                                                                                                                                                                   |             |            |
|------------|-----|------|-------|-------------------------------------------------------------------------------------------------------------------------------------------------------------------|-------------|------------|
| An03g05190 | -5  | 1003 |       | D-sorbitol dehydrogenase                                                                                                                                          | prot_ID_229 | An03g05190 |
| An03g05200 | -6  | 497  | protF | Carboxypeptidase Y family secreted protease; expression repressed by tunicamycin and DTT                                                                          | prot_ID_349 | An03g05200 |
| An03g05210 | -7  | 691  |       | Domain(s) with predicted UDP-N-acetylmuramate dehydrogenase activity, flavin adenine dinucleotide binding activity and role in oxidation-reduction process        | prot_ID_239 | An03g05210 |
| An03g05220 | -8  | 104  |       | Ortholog of A. brasiliensis : Aspbr1_0660526, A. niger ATCC 1015 : 44513-mRNA, A. acidus : Aspfo1_0210672 and Aspergillus carbonarius ITEM 5010 : Acar5010_399425 | prot_ID_6   | An03g05220 |
| An03g05230 | -9  | 859  |       | Ortholog of A. brasiliensis : Aspbr1_0058559, A. acidus : Aspfo1_0142682 and Aspergillus aculeatus ATCC16872 : Aacu16872_042334                                   | prot_ID_235 | An03g05230 |
| An03g05240 | -10 | 487  |       | Domain(s) with predicted nucleotide binding, oxidoreductase activity and role in oxidation-reduction process                                                      | n/a         | An03g05240 |
| An03g05250 | -11 | 419  |       | Domain(s) with predicted role in transmembrane transport and integral to membrane localization                                                                    | n/a         | An03g05250 |
| An03g05260 | -12 | 122  |       | Ortholog(s) have chitosan binding activity                                                                                                                        | n/a         | An03g05260 |
| An03g05270 | -13 | 23   |       |                                                                                                                                                                   | n/a         | An03g05270 |



# An03g05440 cluster

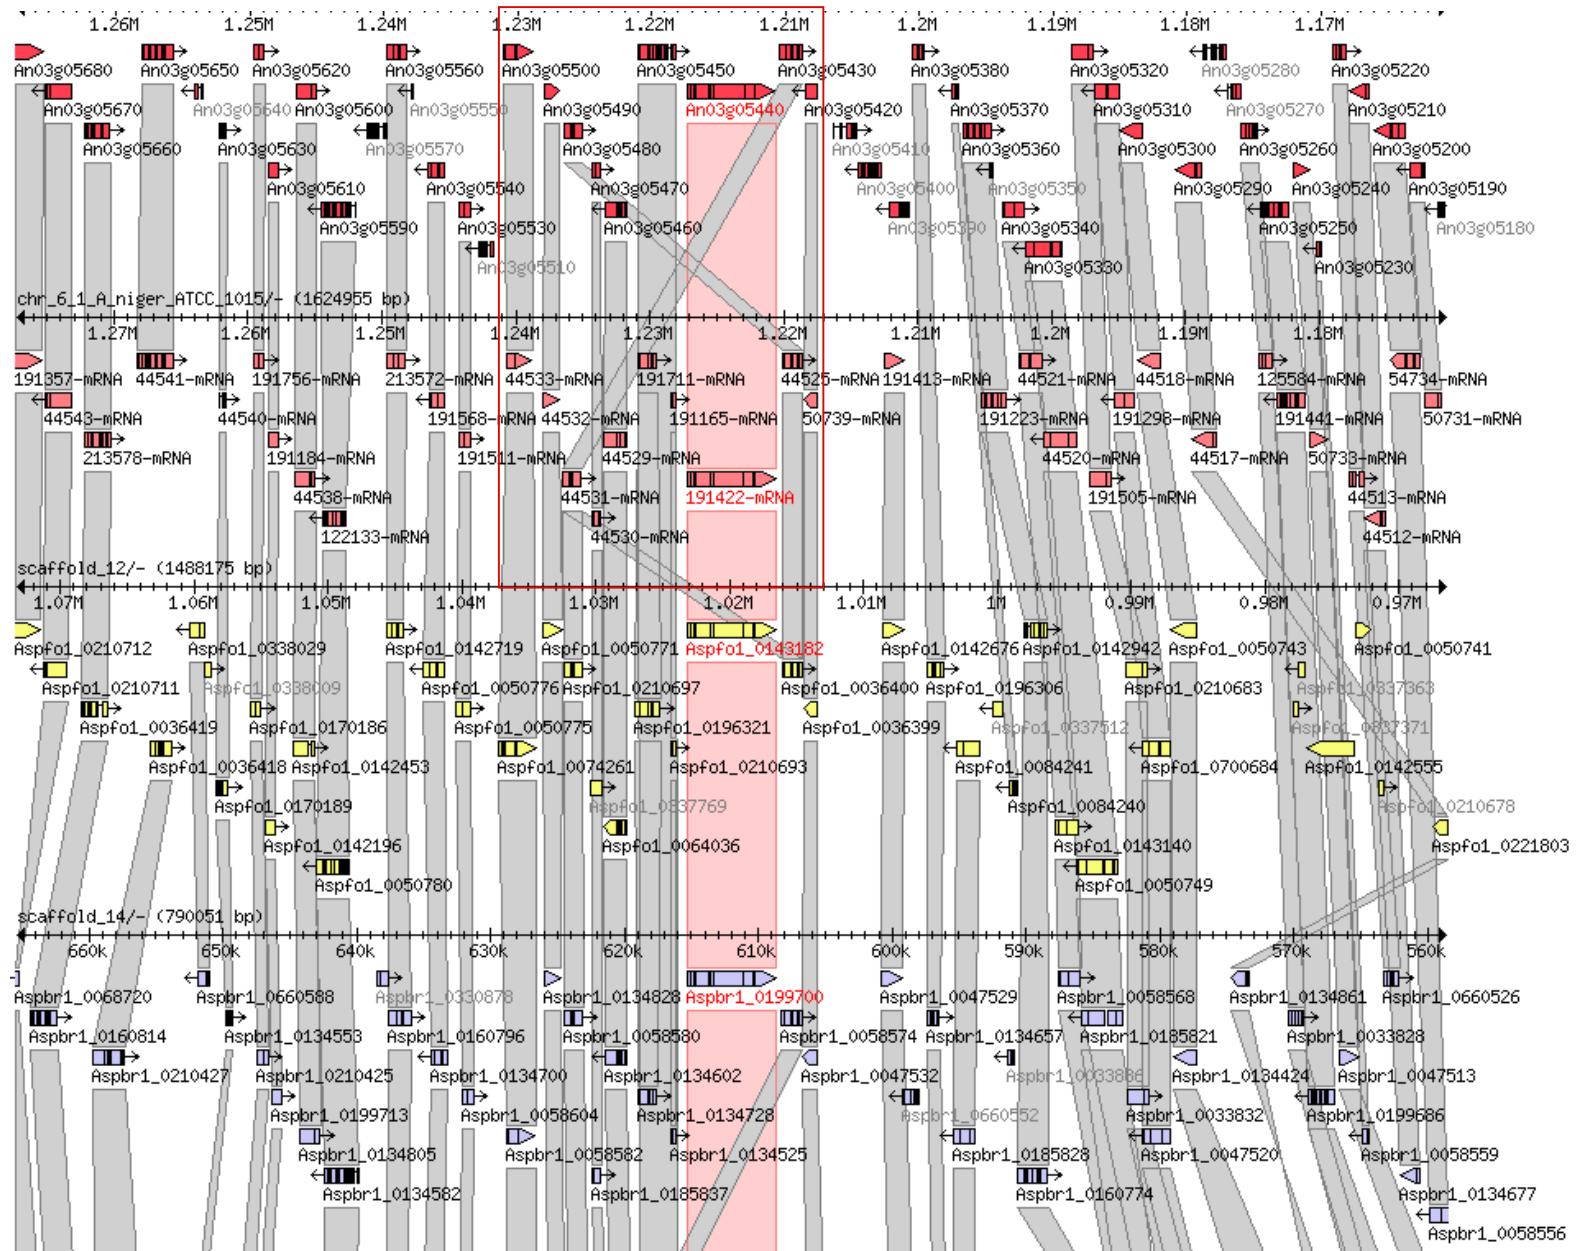

**An03g05440 cluster**

| Gene id (SMURF)   | Gene positions | Gene distance | AspGD name | AspGD description line or supplemental annotation                                                                                                                                                                | protein ID (antiSMASH) | AspGD ID          |
|-------------------|----------------|---------------|------------|------------------------------------------------------------------------------------------------------------------------------------------------------------------------------------------------------------------|------------------------|-------------------|
| An03g05300        | 14             | 88            |            | Tannin acyl hydrolase with a predicted role in tannic acid degradation                                                                                                                                           | n/a                    | An03g05300        |
| An03g05310        | 13             | 115           |            | Salicylate hydroxylase with a predicted role in salicylic acid degradation                                                                                                                                       | n/a                    | An03g05310        |
| An03g05320        | 12             | 758           |            | Domain(s) with predicted substrate-specific transmembrane transporter activity, role in transmembrane transport and integral to membrane localization                                                            | n/a                    | An03g05320        |
| An03g05330        | 11             | 40            |            | Putative beta-glucosidase                                                                                                                                                                                        | prot_ID_68             | An03g05330        |
| An03g05340        | 10             | 647           |            | Domain(s) with predicted DNA binding, sequence-specific DNA binding RNA polymerase II transcription factor activity, sequence-specific DNA binding transcription factor activity, zinc ion binding activity      | prot_ID_389            | An03g05340        |
| An03g05350        | 9              | 140           |            | Protein of unknown function                                                                                                                                                                                      | prot_ID_135            | An03g05350        |
| An03g05360        | 8              | 443           |            | Ortholog of A. nidulans FGSC A4 : AN2821, A. fumigatus Af293 : Afu2g00180, Afu2g17480, A. niger CBS 513.88 : An04g09420 and A. oryzae RIB40 : AO090102000063, AO090009000716                                     | prot_ID_353            | An03g05360        |
| An03g05370        | 7              | 1877          |            | Ortholog of A. acidus : Aspfo1_0084240                                                                                                                                                                           | prot_ID_590            | An03g05370        |
| An03g05380        | 6              | 322           |            | Putative endo-glucanase                                                                                                                                                                                          | prot_ID_173            | An03g05380        |
| An03g05390        | 5              | 598           |            | Protein of unknown function                                                                                                                                                                                      | prot_ID_139            | An03g05390        |
| An03g05400        | 4              | 24            |            | Protein of unknown function                                                                                                                                                                                      | prot_ID_558            | An03g05400        |
| An03g05410        | 3              | 1168          |            | Protein of unknown function                                                                                                                                                                                      | prot_ID_615            | An03g05410        |
| An03g05420        | 2              | 256           | hNmrr      | Protein with a predicted role in nitrogen utilization                                                                                                                                                            | prot_ID_595            | An03g05420        |
| An03g05430        | 1              | 183           |            | Domain(s) with predicted O-methyltransferase activity                                                                                                                                                            | prot_ID_224            | An03g05430        |
| <b>An03g05440</b> | 0              | 0             |            | Domain(s) with predicted ACP phosphopantetheine attachment site binding involved in fatty acid biosynthetic process, hydrolase activity, acting on ester bonds, phosphopantetheine binding, transferase activity | <b>prot_ID_338</b>     | <b>An03g05440</b> |
| An03g05450        | -1             | 751           |            | Domain(s) with predicted monooxygenase activity and role in oxidation-reduction process                                                                                                                          | prot_ID_192            | An03g05450        |
| An03g05460        | -2             | 844           |            | Ortholog(s) have catalytic activity and role in sterigmatocystin biosynthetic process                                                                                                                            | prot_ID_106            | An03g05460        |
| An03g05470        | -3             | 277           |            | Ortholog of A. brasiliensis : Aspbr1_0185837, A. niger ATCC 1015 : 44530-mRNA and Aspergillus carbonarius ITEM 5010 : Acar5010_055781                                                                            | prot_ID_67             | An03g05470        |
| An03g05480        | -4             | 688           |            | Putative O-methyltransferase                                                                                                                                                                                     | prot_ID_63             | An03g05480        |

ECS

|            |    |     |                                                                                                                                               |             |            |     |
|------------|----|-----|-----------------------------------------------------------------------------------------------------------------------------------------------|-------------|------------|-----|
| An03g05490 | -5 | 305 | Maleylacetate reductase<br>Domain(s) with predicted sequence-specific DNA binding                                                             | prot_ID_600 | An03g05490 |     |
| An03g05500 | -6 | 834 | RNA polymerase II transcription factor activity,<br>sequence-specific DNA binding transcription factor<br>activity, zinc ion binding activity | prot_ID_236 | An03g05500 | ECS |
| n/a        |    |     |                                                                                                                                               | prot_ID_449 | An03g05510 |     |
| n/a        |    |     |                                                                                                                                               | prot_ID_381 | An03g05530 |     |
| n/a        |    |     |                                                                                                                                               | prot_ID_15  | An03g05540 |     |

# An03g05680 cluster

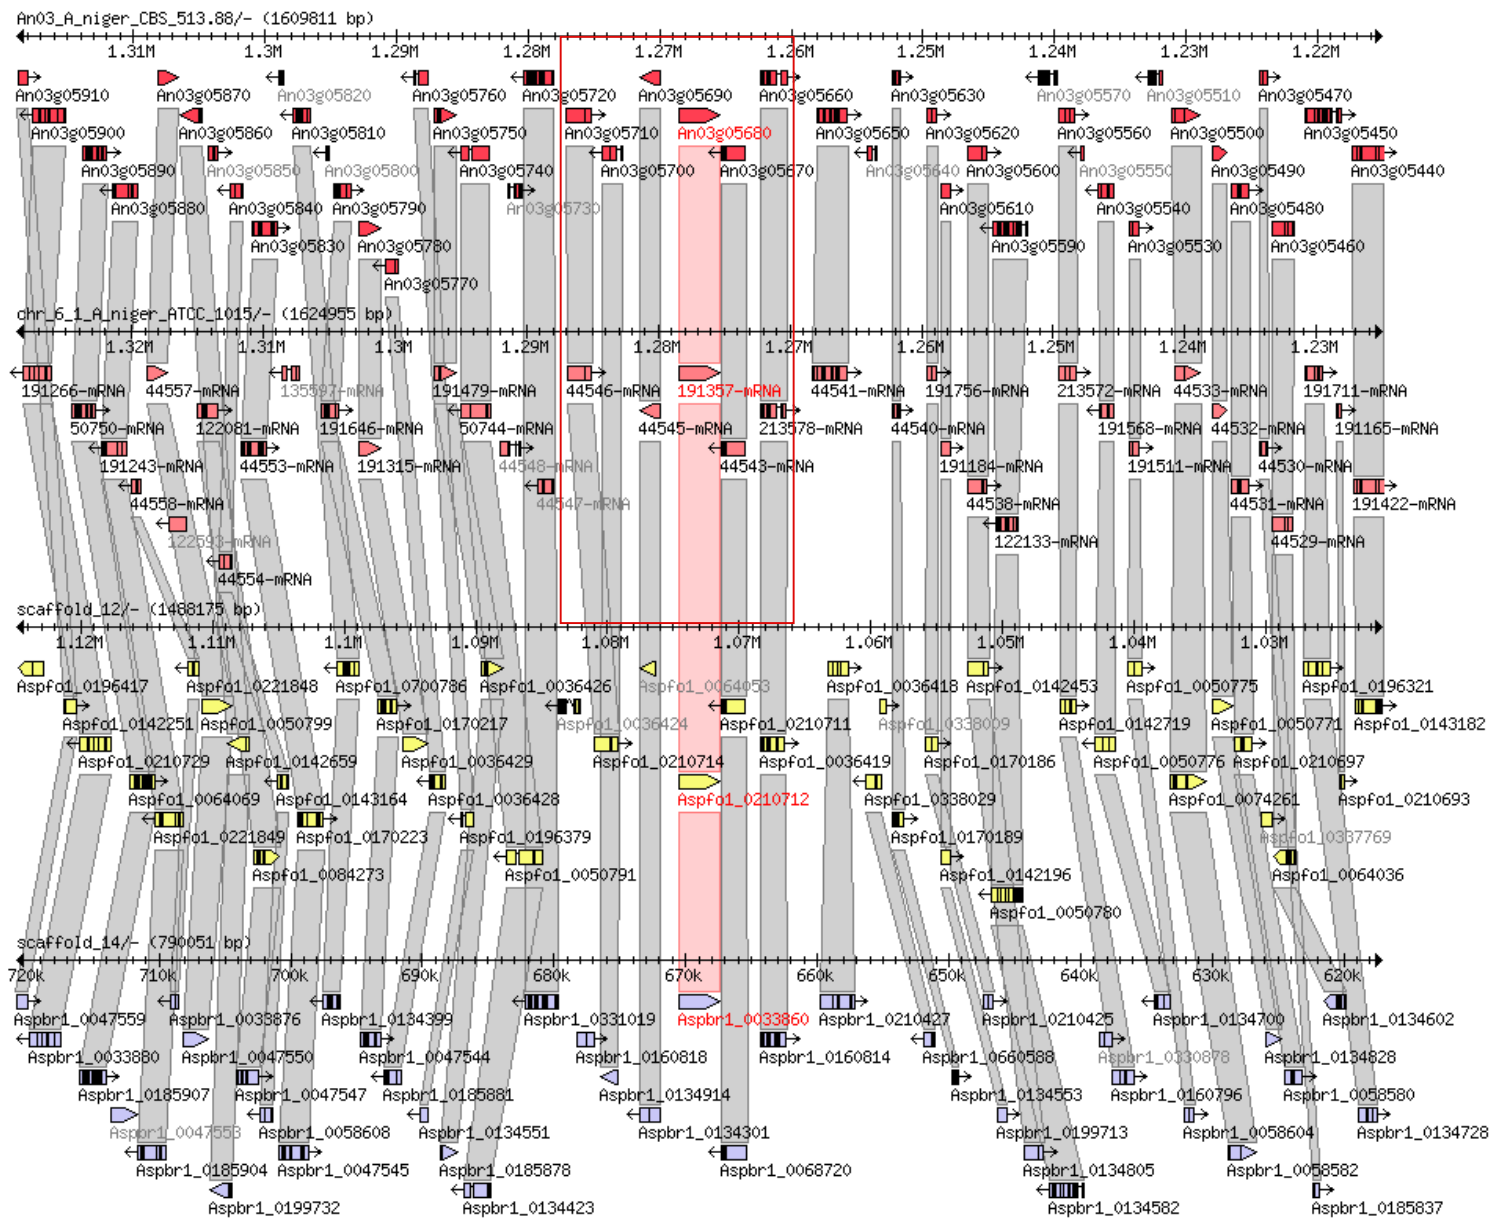

**An03g05680 cluster**

| Gene id (SMURF)   | Gene positions | Gene distance | AspGD name | AspGD description line or supplemental annotation                                                                                                                                                            | protein ID (antiSMASH) | AspGD ID          |
|-------------------|----------------|---------------|------------|--------------------------------------------------------------------------------------------------------------------------------------------------------------------------------------------------------------|------------------------|-------------------|
| n/a               |                |               |            | Ortholog of <i>A. brasiliensis</i> : Aspbr1_0134805, <i>A. acidus</i> : Aspfo1_0142453 and <i>A. niger</i> ATCC 1015 : 44538-mRNA                                                                            | prot_ID_99             | An03g05600        |
| n/a               |                |               |            | Ortholog(s) have intracellular localization                                                                                                                                                                  | prot_ID_151            | An03g05610        |
| n/a               |                |               |            | Ortholog of <i>A. nidulans</i> FGSC A4 : AN2942, AN10320, AN7130, <i>A. fumigatus</i> Af293 : Afu3g15110 and <i>A. niger</i> CBS 513.88 : An15g07840, An12g07260, An03g02580, An01g14840                     | prot_ID_31             | An03g05620        |
| n/a               |                |               |            | Ortholog of <i>A. brasiliensis</i> : Aspbr1_0134553, <i>A. acidus</i> : Aspfo1_0170189, <i>A. niger</i> ATCC 1015 : 44540-mRNA and <i>Aspergillus carbonarius</i> ITEM 5010 : Acar5010_210478                | prot_ID_427            | An03g05630        |
| n/a               |                |               |            |                                                                                                                                                                                                              | prot_ID_251            | An03g05640        |
| n/a               |                |               |            | Ortholog of <i>A. niger</i> ATCC 1015 : 44541-mRNA                                                                                                                                                           | prot_ID_81             | An03g05650        |
| An03g05660        | 2              | 1023          |            | <b>Putative catalase</b>                                                                                                                                                                                     | prot_ID_369            | An03g05660 ECS    |
| An03g05670        | 1              | 215           |            | <b>Ortholog(s) have role in oxidation-reduction process</b>                                                                                                                                                  | prot_ID_186            | An03g05670        |
| <b>An03g05680</b> | 0              | 0             |            | <b>Protein similar to nonribosomal peptide synthases (NRPS-like)</b>                                                                                                                                         | <b>prot_ID_385</b>     | <b>An03g05680</b> |
| An03g05690        | -1             | 1418          |            | Ortholog of <i>A. brasiliensis</i> : Aspbr1_0134301 and <i>A. niger</i> ATCC 1015 : 44545-mRNA                                                                                                               | prot_ID_100            | An03g05690        |
| An03g05700        | -2             | 1309          |            | Ortholog of <i>A. brasiliensis</i> : Aspbr1_0134914                                                                                                                                                          | prot_ID_658            | An03g05700        |
| An03g05710        | -3             | 660           |            | Ortholog of <i>A. niger</i> ATCC 1015 : 44546-mRNA and <i>A. acidus</i> : Aspfo1_0210714                                                                                                                     | prot_ID_591            | An03g05710 ECS    |
| An03g05720        | -4             | 984           |            | Ortholog of <i>A. nidulans</i> FGSC A4 : AN3519, AN2646, AN0587, AN0866, AN7370 and <i>A. fumigatus</i> Af293 : Afu1g15200, Afu3g03790, Afu4g14040, Afu5g06900, Afu7g08575                                   | prot_ID_629            | An03g05720        |
| An03g05730        | -5             | 155           |            |                                                                                                                                                                                                              | prot_ID_197            | An03g05730        |
| An03g05740        | -6             | 1441          |            | Ortholog of <i>A. nidulans</i> FGSC A4 : AN8444/celA, <i>A. fumigatus</i> Af293 : Afu3g03620, Afu8g00680, <i>A. oryzae</i> RIB40 : AO090138000033, AO090701000186 and <i>A. niger</i> ATCC 1015 : 50744-mRNA | prot_ID_386            | An03g05740        |
| An03g05750        | -7             | 442           |            | Domain(s) with predicted role in transmembrane transport and integral to membrane localization                                                                                                               | prot_ID_441            | An03g05750        |
| An03g05760        | -8             | 554           |            | Domain(s) with predicted protein C-terminal S-isoprenylcysteine carboxyl O-methyltransferase activity, role in C-terminal protein methylation and integral to membrane localization                          | prot_ID_12             | An03g05760        |

|            |     |      |                                                                                                                                                                                  |     |            |
|------------|-----|------|----------------------------------------------------------------------------------------------------------------------------------------------------------------------------------|-----|------------|
| An03g05770 | -9  | 1189 | Domain(s) with predicted transporter activity, role in transport and membrane localization                                                                                       | n/a | An03g05770 |
| An03g05780 | -10 | 288  | Ortholog of A. oryzae RIB40 : AO090001000161, AO090020000170, Aspergillus niger ATCC 1015 : 54380-mRNA, A. sydowii : Aspsy1_0214510 and Aspergillus terreus NIH2624 : ATET_02539 | n/a | An03g05780 |
| An03g05790 | -11 | 558  | Domain(s) with predicted O-methyltransferase activity                                                                                                                            | n/a | An03g05790 |
| An03g05800 | -12 | 335  |                                                                                                                                                                                  | n/a | An03g05800 |

# An03g06010 cluster

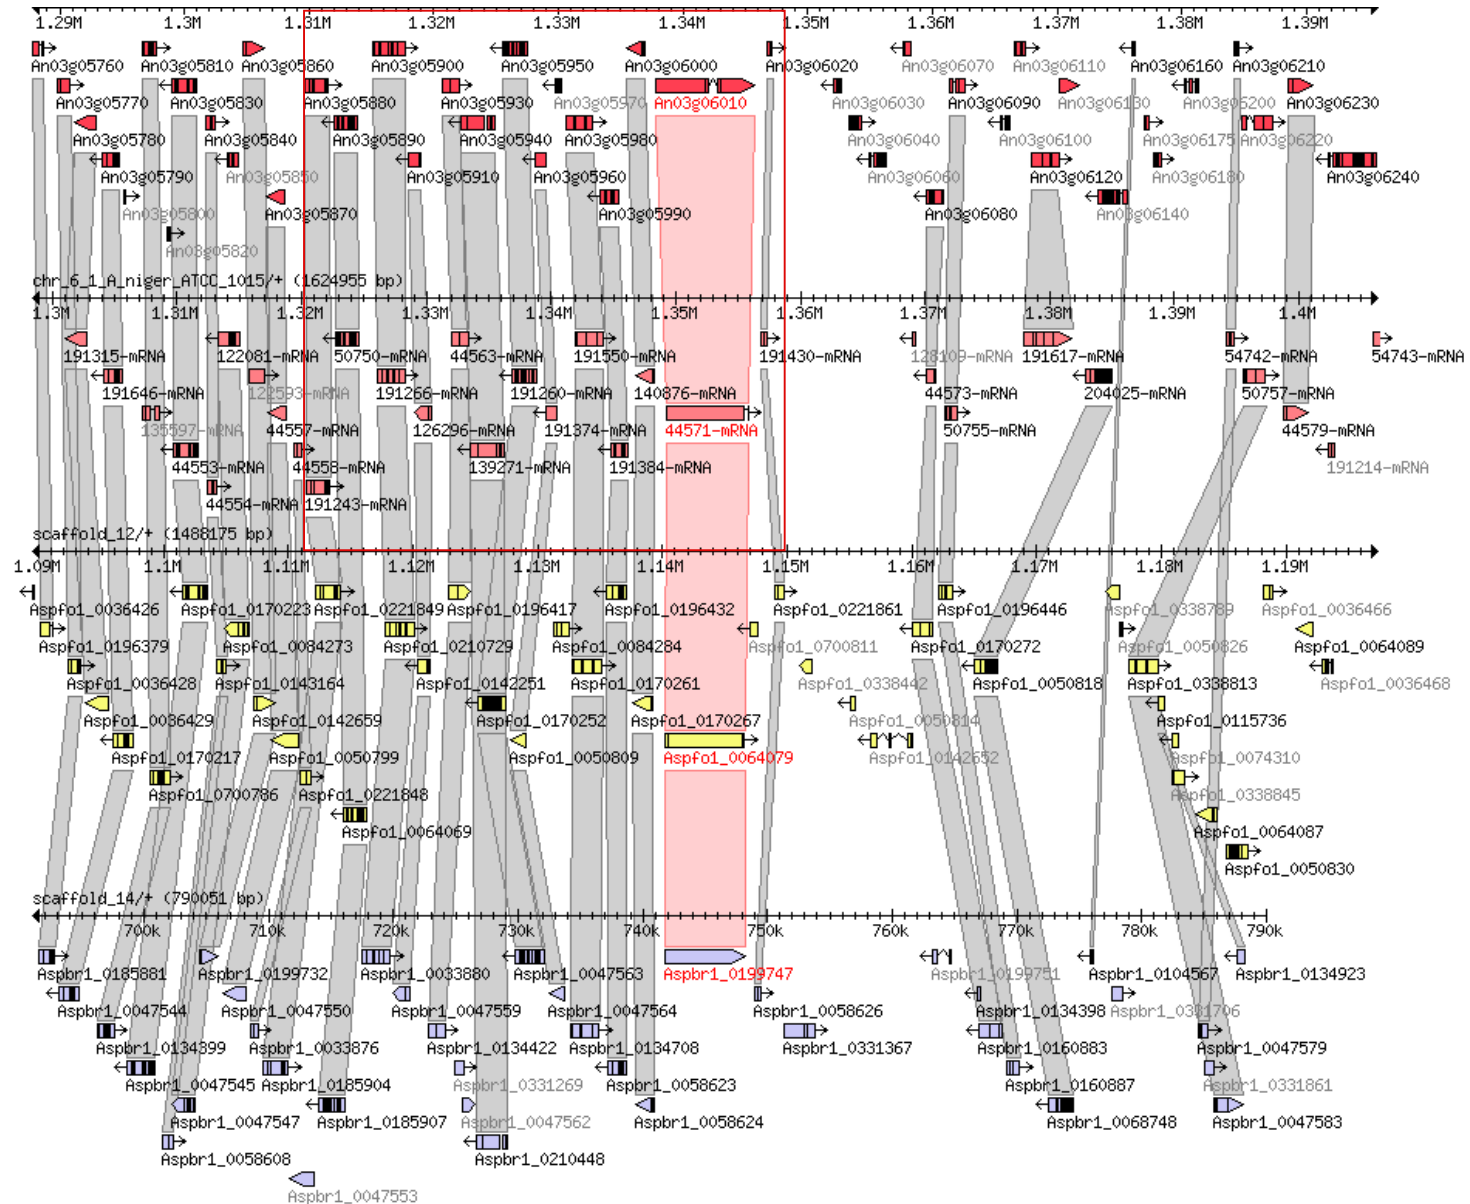

**An03g06010 cluster**

| Gene id (SMURF) | Gene positions | Gene distance | AspGD name | AspGD description line or supplemental annotation                                                                                                                                                                                                                                                | protein ID (antiSMASH) | AspGD ID   |
|-----------------|----------------|---------------|------------|--------------------------------------------------------------------------------------------------------------------------------------------------------------------------------------------------------------------------------------------------------------------------------------------------|------------------------|------------|
| An03g05810      | 19             | 719           |            | Ortholog of <i>A. nidulans</i> FGSC A4 : AN6419, AN6946, AN5312, AN5664, AN8984, AN8971, AN9387, AN1317 and <i>A. fumigatus</i> Af293 : Afu5g13725                                                                                                                                               | n/a                    | An03g05810 |
| An03g05820      | 18             | 55            |            |                                                                                                                                                                                                                                                                                                  | n/a                    | An03g05820 |
| An03g05830      | 17             | 770           |            | Domain(s) with predicted role in transmembrane transport and integral to membrane localization                                                                                                                                                                                                   | n/a                    | An03g05830 |
| An03g05840      | 16             | 792           |            | Domain(s) with predicted N-acetyltransferase activity and role in metabolic process                                                                                                                                                                                                              | n/a                    | An03g05840 |
| An03g05850      | 15             | 366           |            | Domain(s) with predicted sequence-specific DNA binding RNA polymerase II transcription factor activity, sequence-specific DNA binding transcription factor activity, zinc ion binding activity                                                                                                   | n/a                    | An03g05850 |
| An03g05860      | 14             | 128           |            | Ortholog of <i>A. nidulans</i> FGSC A4 : AN6383, <i>A. fumigatus</i> Af293 : Afu1g03300, Afu5g00450, Afu6g10780, <i>A. oryzae</i> RIB40 : AO090003001528, AO090023001010 and <i>A. niger</i> ATCC 1015 : 47798-mRNA                                                                              | n/a                    | An03g05860 |
| An03g05870      | 13             | 1589          |            | Domain(s) with predicted oxidoreductase activity and role in oxidation-reduction process                                                                                                                                                                                                         | n/a                    | An03g05870 |
| An03g05880      | 12             | 362           |            | Putative amidase/acetamidase                                                                                                                                                                                                                                                                     | n/a                    | An03g05880 |
| An03g05890      | 11             | 1318          |            | Domain(s) with predicted role in transmembrane transport and integral to membrane localization<br>Domain(s) with predicted sequence-specific DNA binding RNA polymerase II transcription factor activity, sequence-specific DNA binding transcription factor activity, zinc ion binding activity | n/a                    | An03g05890 |
| An03g05900      | 10             | 321           |            | Ortholog of <i>A. nidulans</i> FGSC A4 : AN12339, <i>A. fumigatus</i> Af293 : Afu8g01800, <i>A. oryzae</i> RIB40 : AO090010000636, <i>A. niger</i> ATCC 1015 : 126296-mRNA and <i>A. versicolor</i> : Aspve1_0046675                                                                             | n/a                    | An03g05900 |
| An03g05910      | 9              | 1677          |            |                                                                                                                                                                                                                                                                                                  | prot_ID_388            | An03g05910 |
| An03g05930      | 8              | 283           |            | Domain(s) with predicted acid phosphatase activity                                                                                                                                                                                                                                               | prot_ID_342            | An03g05930 |
| An03g05940      | 7              | 808           | gfaB       | Putative glutamine:fructose-6-phosphate amidotransferase; induced by caspofungin                                                                                                                                                                                                                 | prot_ID_230            | An03g05940 |
| An03g05950      | 6              | 667           |            | Domain(s) with predicted role in transmembrane transport and integral to membrane localization                                                                                                                                                                                                   | prot_ID_491            | An03g05950 |
| An03g05960      | 5              | 689           |            | Domain(s) with predicted catalytic activity                                                                                                                                                                                                                                                      | prot_ID_141            | An03g05960 |
| An03g05970      | 4              | 317           |            | Protein of unknown function                                                                                                                                                                                                                                                                      | prot_ID_17             | An03g05970 |
| An03g05980      | 3              | 549           |            | Domain(s) with predicted DNA binding, zinc ion binding activity, role in transcription, DNA-dependent and                                                                                                                                                                                        | prot_ID_103            | An03g05980 |



nucleus localization

|                   |    |      |                                                                                                                                                                                                    |                    |                   |          |
|-------------------|----|------|----------------------------------------------------------------------------------------------------------------------------------------------------------------------------------------------------|--------------------|-------------------|----------|
| An03g05990        | 2  | 615  | Domain(s) with predicted O-methyltransferase activity                                                                                                                                              | prot_ID_267        | An03g05990        |          |
| An03g06000        | 1  | 896  | Domain(s) with predicted UDP-N-acetylmuramate dehydrogenase activity, flavin adenine dinucleotide binding activity and role in oxidation-reduction process                                         | prot_ID_237        | An03g06000        |          |
| <b>An03g06010</b> | 0  | 0    | Domain(s) with predicted ACP phosphopantetheine attachment site binding involved in fatty acid biosynthetic process, ligase activity, nucleotide binding, phosphopantetheine binding activity      | <b>prot_ID_645</b> | <b>An03g06010</b> |          |
| An03g06020        | -1 | 1076 | 4-carboxymuconolactone decarboxylase                                                                                                                                                               | prot_ID_66         | An03g06020        | ECS, IGD |
| n/a               |    |      |                                                                                                                                                                                                    | prot_ID_222        | An03g06030        |          |
| n/a               |    |      |                                                                                                                                                                                                    | prot_ID_476        | An03g06040        |          |
| n/a               |    |      |                                                                                                                                                                                                    | prot_ID_260        | An03g06060        |          |
| n/a               |    |      |                                                                                                                                                                                                    | prot_ID_311        | An03g06070        |          |
| n/a               |    |      | Has domain(s) with predicted sequence-specific DNA binding RNA polymerase II transcription factor activity, sequence-specific DNA binding transcription factor activity, zinc ion binding activity | prot_ID_278        | An03g06080        |          |
| n/a               |    |      | Has domain(s) with predicted role in response to stress and integral to membrane localization                                                                                                      | prot_ID_145        | An03g06090        |          |
| n/a               |    |      |                                                                                                                                                                                                    | prot_ID_379        | An03g06100        |          |

## An03g06380 cluster

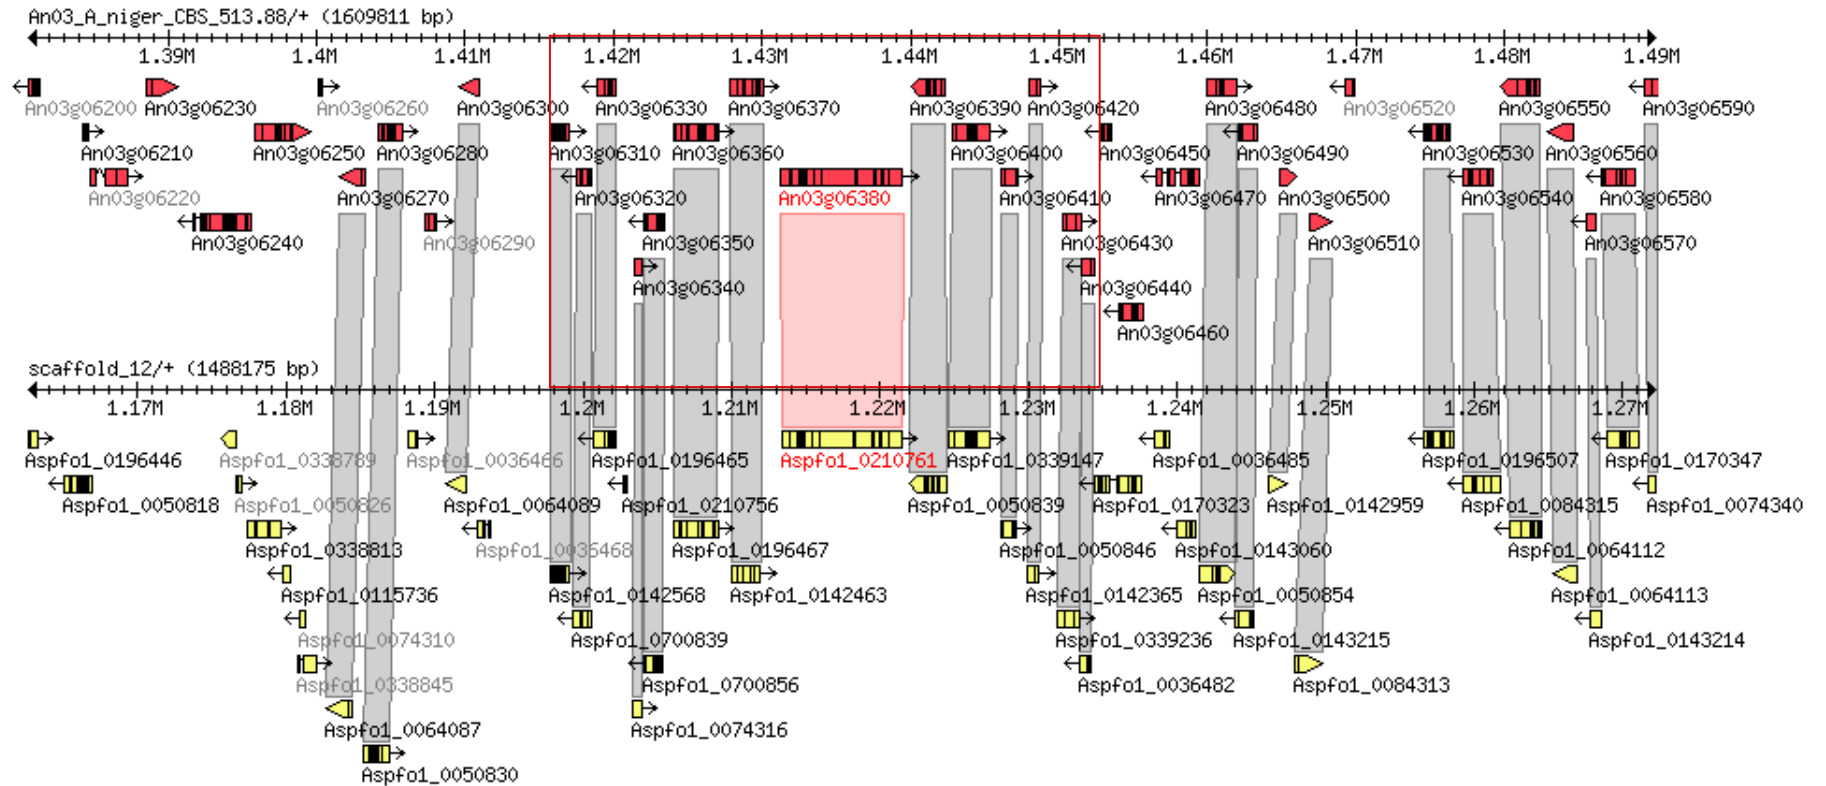

**An03g06380 cluster**

| Gene id (SMURF)   | Gene positions | Gene distance | AspGD name | AspGD description line or supplemental annotation                                                                                                                                                                                                                  | protein ID (antiSMASH) | AspGD ID          |          |
|-------------------|----------------|---------------|------------|--------------------------------------------------------------------------------------------------------------------------------------------------------------------------------------------------------------------------------------------------------------------|------------------------|-------------------|----------|
| n/a               |                |               | pmeA       | <b>Pectin methylesterase</b>                                                                                                                                                                                                                                       | prot_ID_586            | An03g06310        | EGS, IGD |
| n/a               |                |               |            | Has domain(s) with predicted catalytic activity and role in metabolic process<br>Ortholog of A. nidulans FGSC A4 : AN9032, AN10883, A. fumigatus Af293 : Afu7g06950, Afu8g02470, A. niger CBS 513.88 : An03g00350, An05g02580 and A. oryzae RIB40 : AO090010000660 | prot_ID_414            | An03g06320        |          |
| n/a               |                |               |            | Ortholog of A. nidulans FGSC A4 : AN11171, AN7148, A. fumigatus Af293 : Afu4g03595, A. niger CBS 513.88 : An02g01320, An14g01685 and A. oryzae RIB40 : AO090026000213, AO090026000142, AO090023000130                                                              | prot_ID_20             | An03g06330        |          |
| n/a               |                |               |            | Ortholog of A. nidulans FGSC A4 : AN4366, A. brasiliensis : Aspbr1_0060292, A. acidus : Aspfo1_0700856, A. versicolor : Aspve1_0752573 and A. sydowii : Aspsy1_0051206                                                                                             | prot_ID_480            | An03g06340        |          |
| n/a               |                |               |            | Putative chitin synthase                                                                                                                                                                                                                                           | prot_ID_118            | An03g06350        |          |
| n/a               |                |               |            | Domain(s) with predicted DNA binding, zinc ion binding activity, role in transcription, DNA-dependent and nucleus localization                                                                                                                                     | prot_ID_567            | An03g06360        |          |
| An03g06370        | 1              | 1069          |            | Domain(s) with predicted ACP phosphopantetheine attachment site binding involved in fatty acid biosynthetic process, nucleotide binding, oxidoreductase activity and transferase activity, more                                                                    | prot_ID_290            | An03g06370        |          |
| <b>An03g06380</b> | 0              | 0             |            | Domain(s) with predicted monooxygenase activity and role in oxidation-reduction process                                                                                                                                                                            | <b>prot_ID_272</b>     | <b>An03g06380</b> |          |
| An03g06390        | -1             | 612           |            | Domain(s) with predicted DNA binding, zinc ion binding activity, role in transcription, DNA-dependent and nucleus localization                                                                                                                                     | prot_ID_655            | An03g06390        |          |
| An03g06400        | -2             | 528           |            | Putative C-4 methyl sterol oxidase; induced by fenpropimorph                                                                                                                                                                                                       | prot_ID_51             | An03g06400        |          |
| An03g06410        | -3             | 777           | erg25      | Domain(s) with predicted N-acetyltransferase activity and role in metabolic process                                                                                                                                                                                | prot_ID_89             | An03g06410        |          |
| An03g06420        | -4             | 799           |            | Domain(s) with predicted nucleotide binding, oxidoreductase activity, transferase activity, transferring acyl groups other than amino-acyl groups, zinc ion binding activity and role in oxidation-reduction process                                               | prot_ID_84             | An03g06420        |          |
| An03g06430        | -5             | 1414          |            | Ortholog of A. nidulans FGSC A4 : AN8906, A. fumigatus Af293 : Afu8g02420, A. oryzae RIB40 : AO090010000669, A. niger ATCC 1015 : 126819-mRNA                                                                                                                      | prot_ID_537            | An03g06430        |          |
| An03g06440        | -6             | 59            |            | and A. sydowii : Aspsy1_0072834                                                                                                                                                                                                                                    | prot_ID_562            | An03g06440        | ECS      |

|            |     |      |                                                                                                                                                                                                                            |             |            |
|------------|-----|------|----------------------------------------------------------------------------------------------------------------------------------------------------------------------------------------------------------------------------|-------------|------------|
| An03g06450 | -7  | 465  | Domain(s) with predicted cell outer membrane, integral to membrane localization                                                                                                                                            | prot_ID_512 | An03g06450 |
| An03g06460 | -8  | 445  | Domain(s) with predicted electron carrier activity, heme binding, iron ion binding, monooxygenase activity, oxidoreductase activity, acting on paired donors, with incorporation or reduction of molecular oxygen activity | prot_ID_580 | An03g06460 |
| An03g06470 | -9  | 927  | Ortholog of <i>Aspergillus carbonarius</i> ITEM 5010 : Acar5010_399475                                                                                                                                                     | prot_ID_200 | An03g06470 |
| An03g06480 | -10 | 525  | Ortholog(s) have monooxygenase activity and role in sterigmatocystin biosynthetic process                                                                                                                                  | n/a         | An03g06470 |
| An03g06490 | -11 | 127  | Ortholog(s) have lipase activity                                                                                                                                                                                           | n/a         | An03g06480 |
| An03g06500 | -12 | 1440 | Domain(s) with predicted monooxygenase activity and role in oxidation-reduction process                                                                                                                                    | n/a         | An03g06490 |
| An03g06510 | -13 | 838  | Domain(s) with predicted sequence-specific DNA binding RNA polymerase II transcription factor activity, sequence-specific DNA binding transcription factor activity, zinc ion binding activity                             | n/a         | An03g06500 |
| An03g06520 | -14 | 840  |                                                                                                                                                                                                                            | n/a         | An03g06510 |

## An04g01150 cluster

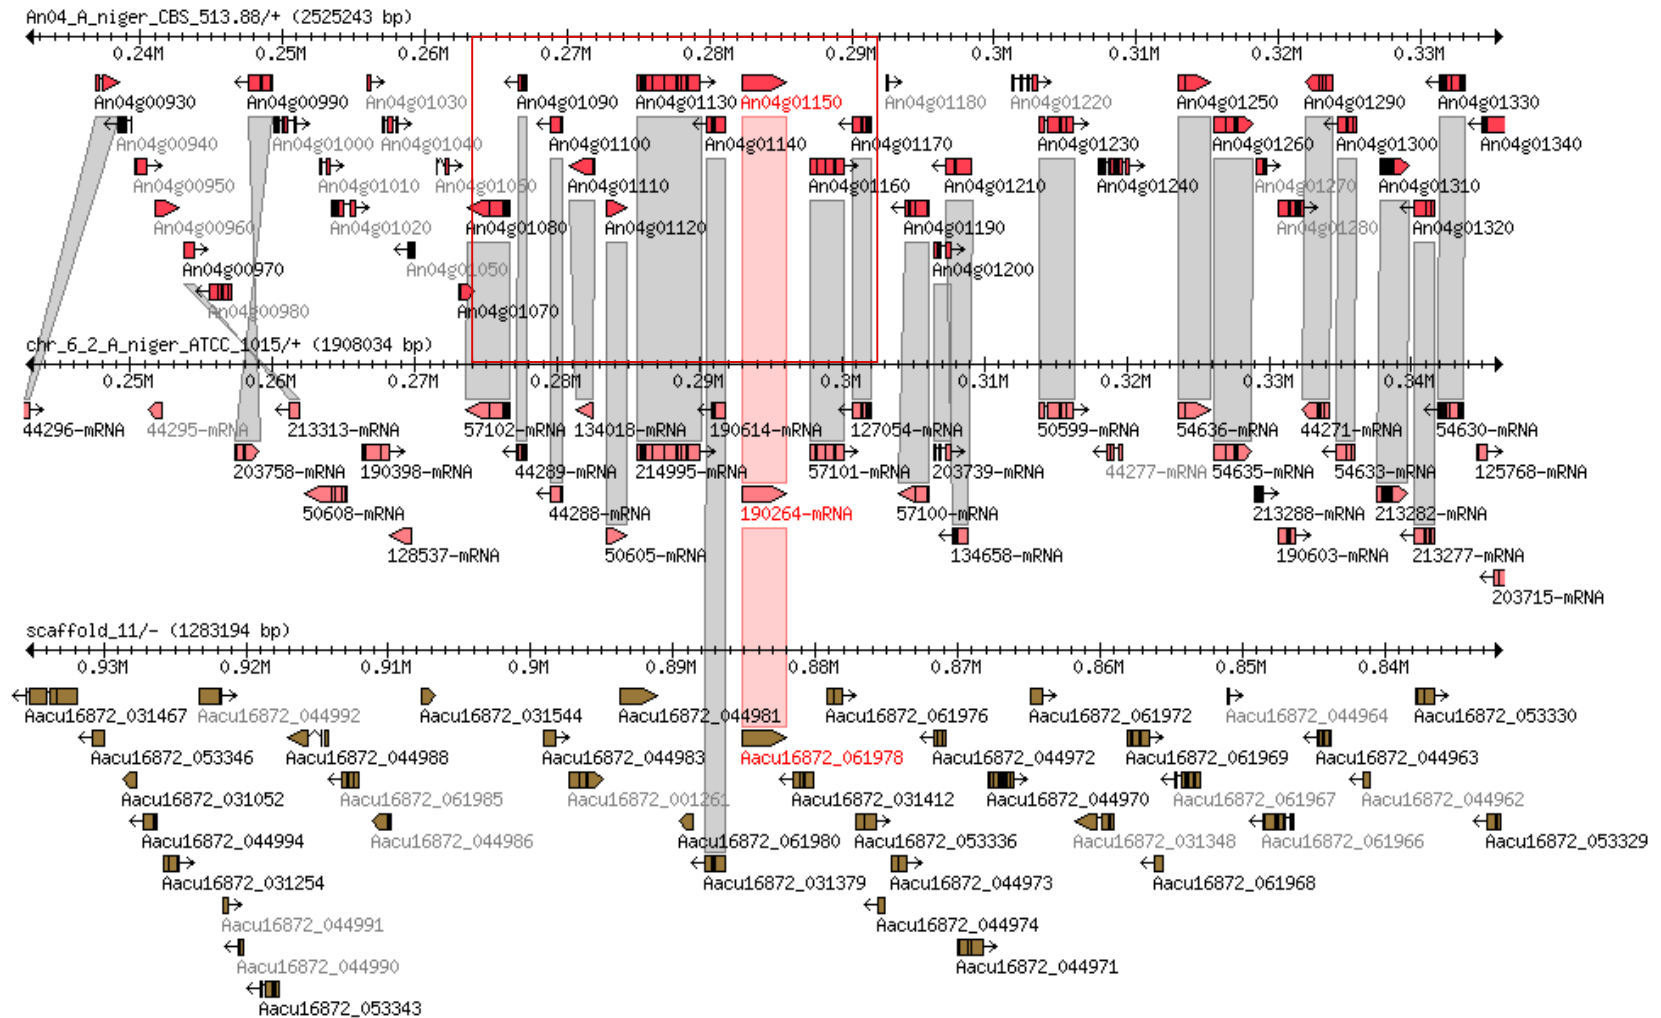

**An04g01150 cluster**

| Gene id (SMURF)   | Gene positions | Gene distance | AspGD name | AspGD description line or supplemental annotation                                                                                                                                                                     | protein ID (antiSMASH) | AspGD ID          |     |
|-------------------|----------------|---------------|------------|-----------------------------------------------------------------------------------------------------------------------------------------------------------------------------------------------------------------------|------------------------|-------------------|-----|
| n/a               |                |               |            | Ortholog of A. brasiliensis : Aspbr1_0127044, A. acidus : Aspfo1_0044764 and Aspergillus carbonarius ITEM 5010 : Acar5010_002835                                                                                      | prot_ID_168            | An04g01070        |     |
| n/a               |                |               |            | Ribonucleotide reductase                                                                                                                                                                                              | prot_ID_665            | An04g01080        | ECS |
| n/a               |                |               |            | Ortholog of A. nidulans FGSC A4 : AN4381, A. fumigatus Af293 : Afu4g06700, A. oryzae RIB40 : AO090023000915, A. niger ATCC 1015 : 44289-mRNA and A. versicolor : Aspve1_0043230                                       | prot_ID_731            | An04g01090        |     |
| n/a               |                |               |            | Has domain(s) with predicted nucleoside-triphosphatase activity, nucleotide binding activity                                                                                                                          | prot_ID_493            | An04g01100        |     |
| n/a               |                |               |            | Ortholog of A. nidulans FGSC A4 : AN4383, A. fumigatus Af293 : Afu4g06730, A. oryzae RIB40 : AO090023000913, A. niger ATCC 1015 : 134018-mRNA and A. versicolor : Aspve1_0043227                                      | prot_ID_862            | An04g01110        |     |
| An04g01120        | 3              | 872           |            | Tetrahydrofolylpolyglutamate synthase                                                                                                                                                                                 | prot_ID_484            | An04g01120        |     |
| An04g01130        | 2              | 345           |            | Ortholog(s) have role in cytokinesis, actomyosin contractile ring assembly                                                                                                                                            | prot_ID_58             | An04g01130        |     |
| An04g01140        | 1              | 1193          |            | 8-Amino-7-oxononanoate synthase                                                                                                                                                                                       | prot_ID_261            | An04g01140        |     |
| <b>An04g01150</b> | 0              | 0             |            | Domain(s) with predicted ACP phosphopantetheine attachment site binding involved in fatty acid biosynthetic process, L-aminoadipate-semialdehyde dehydrogenase activity, ligase activity, nucleotide binding activity | <b>prot_ID_858</b>     | <b>An04g01150</b> |     |
| An04g01160        | -1             | 1670          |            | Domain(s) with predicted transferase activity, transferring phosphorus-containing groups activity                                                                                                                     | prot_ID_458            | An04g01160        |     |
| An04g01170        | -2             | 1390          |            | Ortholog(s) have role in cellular iron ion homeostasis, iron-sulfur cluster assembly, tRNA wobble uridine modification and mitochondrial matrix localization                                                          | prot_ID_969            | An04g01170        | ECS |
| n/a               |                |               |            | Protein of unknown function                                                                                                                                                                                           | prot_ID_737            | An04g01180        |     |
| n/a               |                |               |            | Ortholog of A. nidulans FGSC A4 : AN4387, A. fumigatus Af293 : Afu4g06780, A. oryzae RIB40 : AO090023000908, A. niger ATCC 1015 : 57100-mRNA and A. versicolor : Aspve1_0750571                                       | prot_ID_402            | An04g01190        |     |
| n/a               |                |               |            | Ortholog(s) have ubiquinol-cytochrome-c reductase activity and role in aerobic respiration, mitochondrial electron transport, ubiquinol to cytochrome c, mitochondrial respiratory chain complex III assembly         | prot_ID_855            | An04g01200        |     |
| n/a               |                |               |            | Has domain(s) with predicted catalytic activity and role in base-excision repair                                                                                                                                      | prot_ID_86             | An04g01210        |     |

|     |      |                                         |             |            |
|-----|------|-----------------------------------------|-------------|------------|
| n/a |      | Protein of unknown function             | prot_ID_698 | An04g01220 |
| n/a | ecmA | Putative cell wall organization protein | prot_ID_342 | An04g01230 |

## An04g04340/An04g04380 cluster

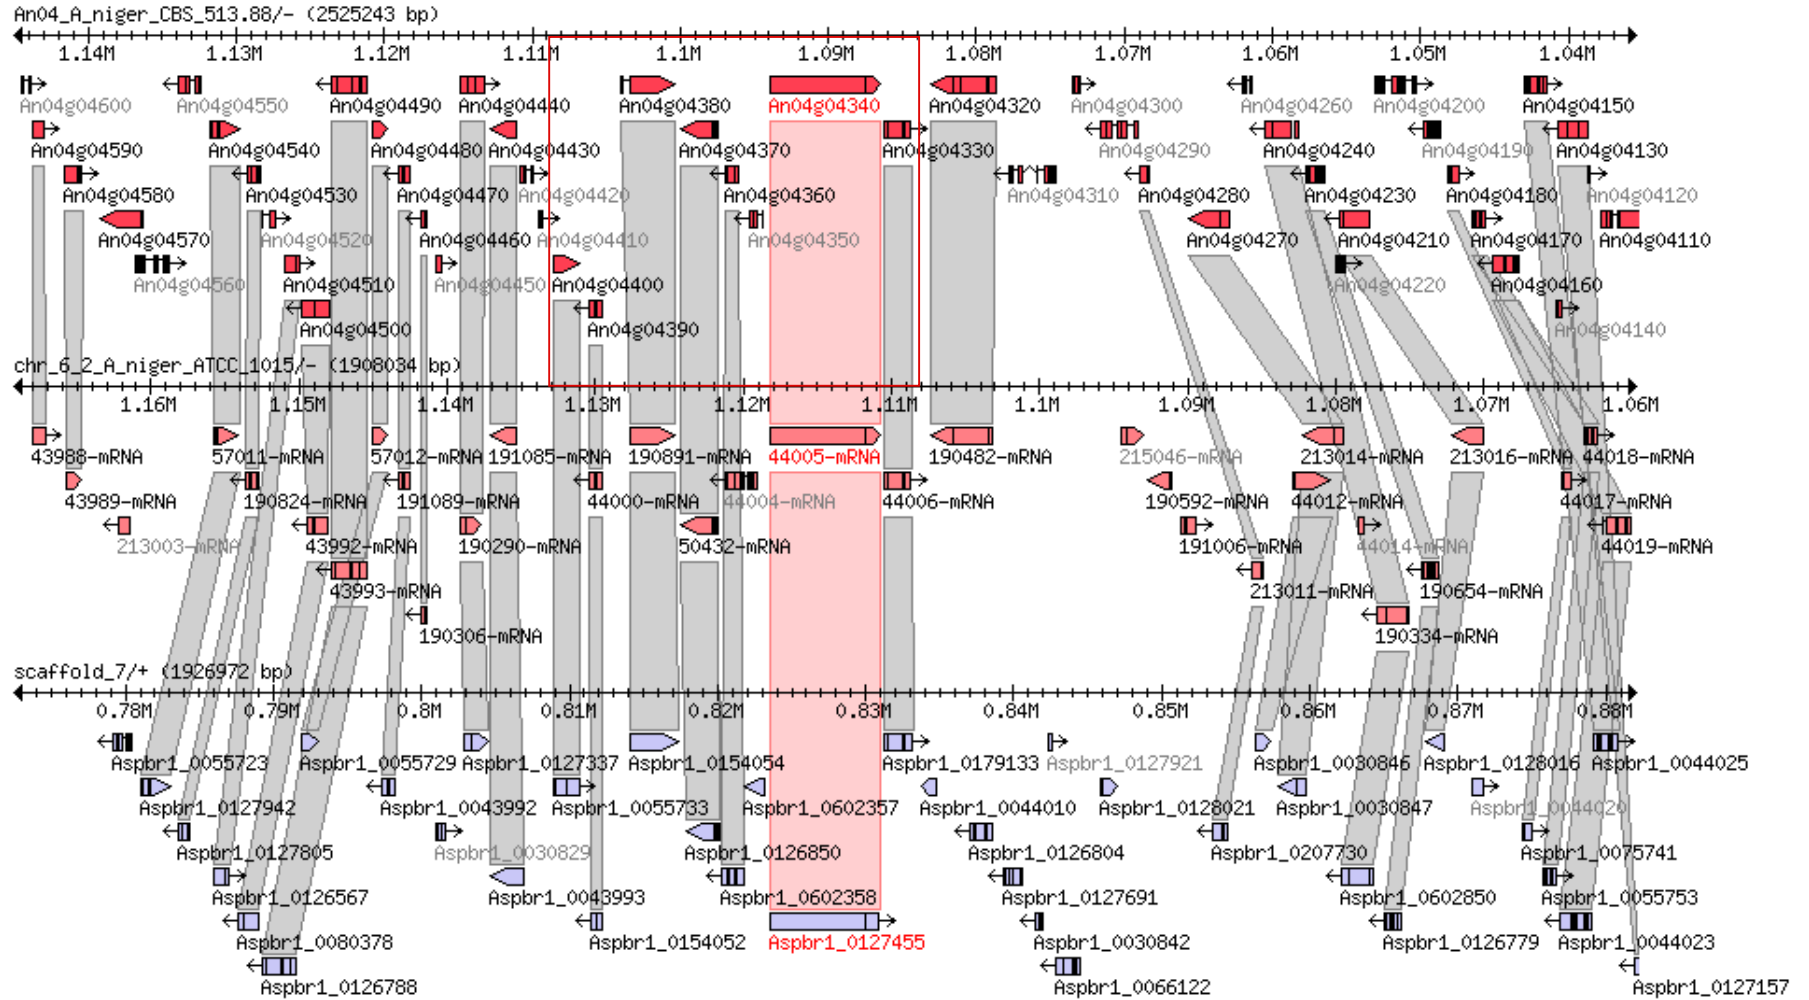



**An04g04340 cluster**

| Gene id (SMURF)   | Gene positions | Gene distance | AspGD name | AspGD description line or supplemental annotation                                                                                                                                                                                                                      | protein ID (antiSMASH) | AspGD ID          |
|-------------------|----------------|---------------|------------|------------------------------------------------------------------------------------------------------------------------------------------------------------------------------------------------------------------------------------------------------------------------|------------------------|-------------------|
| An04g04220        | 11             | 701           |            | Protein of unknown function<br>Ortholog of <i>A. nidulans</i> FGSC A4 : AN1613, <i>A. oryzae</i> RIB40 : AO090023000625, <i>A. niger</i> ATCC 1015 : 190654-mRNA, <i>A. versicolor</i> : Aspve1_0037431 and <i>A. sydowii</i> : Aspsy1_0055705                         | n/a                    | An04g04220        |
| An04g04230        | 10             | 664           |            | Domain(s) with predicted transmembrane transporter activity, role in transmembrane transport and integral to membrane localization                                                                                                                                     | n/a                    | An04g04230        |
| An04g04240        | 9              | 984           |            | Protein of unknown function                                                                                                                                                                                                                                            | n/a                    | An04g04240        |
| An04g04260        | 8              | 873           |            | Domain(s) with predicted N,N-dimethylaniline monooxygenase activity, NADP binding, flavin adenine dinucleotide binding activity and role in oxidation-reduction process                                                                                                | n/a                    | An04g04260        |
| An04g04270        | 7              | 3511          |            | Ortholog of <i>A. nidulans</i> FGSC A4 : AN1608, <i>A. fumigatus</i> Af293 : Afu4g09250, <i>A. oryzae</i> RIB40 : AO090023000611, <i>A. niger</i> ATCC 1015 : 213011-mRNA and <i>A. versicolor</i> : Aspve1_0024878, Aspve1_0041545                                    | n/a                    | An04g04270        |
| An04g04280        | 6              | 219           |            | Protein of unknown function                                                                                                                                                                                                                                            | prot_ID_411            | An04g04280        |
| An04g04290        | 5              | 1334          |            | Protein of unknown function                                                                                                                                                                                                                                            | prot_ID_338            | An04g04290        |
| An04g04300        | 4              | 1245          |            | Protein of unknown function                                                                                                                                                                                                                                            | prot_ID_225            | An04g04300        |
| An04g04310        | 3              | 845           |            | Ortholog of <i>A. nidulans</i> FGSC A4 : AN3342, AN10302, AN4609, <i>A. fumigatus</i> Af293 : Afu7g06670, <i>A. niger</i> CBS 513.88 : An16g05670, An04g03250 and <i>A. oryzae</i> RIB40 : AO090011000012                                                              | prot_ID_828            | An04g04310        |
| An04g04320        | 2              | 1266          |            | <b>Ferulate:CoA ligase (AMP-forming)</b><br>Domain(s) with predicted ACP phosphopantetheine attachment site binding involved in fatty acid biosynthetic process, nucleotide binding, phosphopantetheine binding, transferase activity and role in biosynthetic process | prot_ID_146            | An04g04320        |
| An04g04330        | 1              | 289           |            | <b>Ferulate:CoA ligase (AMP-forming)</b><br>Domain(s) with predicted ACP phosphopantetheine attachment site binding involved in fatty acid biosynthetic process, nucleotide binding, phosphopantetheine binding, transferase activity and role in biosynthetic process | prot_ID_141            | An04g04330 ECS    |
| <b>An04g04340</b> | 0              | 0             |            | <b>Protein of unknown function</b>                                                                                                                                                                                                                                     | <b>prot_ID_445</b>     | <b>An04g04340</b> |
| An04g04350        | -1             | 465           |            | Domain(s) with predicted hydrolase activity, acting on ester bonds activity and role in biosynthetic process                                                                                                                                                           | prot_ID_765            | An04g04350        |
| An04g04360        | -2             | 713           |            | Domain(s) with predicted ammonia-lyase activity, role in L-phenylalanine catabolic process, biosynthetic process and cytoplasm localization                                                                                                                            | prot_ID_109            | An04g04360        |
| An04g04370        | -3             | 488           |            |                                                                                                                                                                                                                                                                        | prot_ID_653            | An04g04370        |

|            |     |      |                                                                                                                                                                                                                                                                                                                                                                                                          |              |            |     |
|------------|-----|------|----------------------------------------------------------------------------------------------------------------------------------------------------------------------------------------------------------------------------------------------------------------------------------------------------------------------------------------------------------------------------------------------------------|--------------|------------|-----|
| An04g04380 | -4  | 659  | Domain(s) with predicted ACP phosphopantetheine attachment site binding involved in fatty acid biosynthetic process, L-aminoadipate-semialdehyde dehydrogenase activity, ligase activity, nucleotide binding activity                                                                                                                                                                                    | prot_ID_68   | An04g04380 |     |
| An04g04390 | -5  | 1402 | Domain(s) with predicted catalytic activity and role in metabolic process<br>Ortholog of <i>A. nidulans</i> FGSC A4 : AN3871, <i>A. oryzae</i> RIB40 : AO090001000062, <i>A. brasiliensis</i> : Aspbr1_0055733, <i>N. fischeri</i> NRRL 181 : NFIA_045750 and <i>A. acidus</i> : Aspfo1_0080449                                                                                                          | prot_ID_474  | An04g04390 |     |
| An04g04400 | -6  | 770  |                                                                                                                                                                                                                                                                                                                                                                                                          | prot_ID_769  | An04g04400 | ECS |
| An04g04410 | -7  | 658  | Protein of unknown function                                                                                                                                                                                                                                                                                                                                                                              | prot_ID_749  | An04g04410 |     |
| An04g04420 | -8  | 340  | Protein of unknown function                                                                                                                                                                                                                                                                                                                                                                              | prot_ID_111  | An04g04420 |     |
| An04g04430 | -9  | 285  | Tannin acyl hydrolase with a predicted role in tannic acid degradation                                                                                                                                                                                                                                                                                                                                   | prot_ID_107  | An04g04430 |     |
| An04g04440 | -10 | 420  | Domain(s) with predicted UDP-N-acetylmuramate dehydrogenase activity, flavin adenine dinucleotide binding activity and role in oxidation-reduction process                                                                                                                                                                                                                                               | prot_ID_67   | An04g04440 |     |
| An04g04450 | -11 | 1273 | Protein of unknown function<br>Ortholog of <i>A. nidulans</i> FGSC A4 : AN11871, <i>A. fumigatus</i> Af293 : Afu1g11260, Afu6g00270, <i>A. niger</i> CBS 513.88 : An03g03440 and <i>A. niger</i> ATCC 1015 : 190306-mRNA                                                                                                                                                                                 | prot_ID_1011 | An04g04450 |     |
| An04g04460 | -12 | 648  |                                                                                                                                                                                                                                                                                                                                                                                                          | prot_ID_848  | An04g04460 |     |
| An04g04470 | -13 | 765  | Domain(s) with predicted N-acetyltransferase activity and role in metabolic process                                                                                                                                                                                                                                                                                                                      | prot_ID_466  | An04g04470 |     |
| An04g04480 | -14 | 754  | Domain(s) with predicted nucleotide binding, oxidoreductase activity, zinc ion binding activity and role in oxidation-reduction process                                                                                                                                                                                                                                                                  | prot_ID_916  | An04g04480 |     |
| An04g04490 | -15 | 394  | Domain(s) with predicted DNA binding, sequence-specific DNA binding RNA polymerase II transcription factor activity, sequence-specific DNA binding transcription factor activity, zinc ion binding activity                                                                                                                                                                                              | prot_ID_709  | An04g04490 |     |
| An04g04500 | -16 | 460  | Ortholog of <i>A. brasiliensis</i> : Aspbr1_0080378, <i>A. acidus</i> : Aspfo1_0572809, <i>Aspergillus niger</i> ATCC 1015 : 43992-mRNA and <i>Aspergillus terreus</i> NIH2624 : ATET_03625<br>Domain(s) with predicted protein dimerization activity, sequence-specific DNA binding, sequence-specific DNA binding transcription factor activity and role in regulation of transcription, DNA-dependent | prot_ID_110  | An04g04500 |     |
| An04g04510 | -17 | 113  |                                                                                                                                                                                                                                                                                                                                                                                                          | n/a          | An04g04510 |     |
| An04g04520 | -18 | 542  | Protein of unknown function                                                                                                                                                                                                                                                                                                                                                                              | n/a          | An04g04520 |     |

# An04g06260 cluster

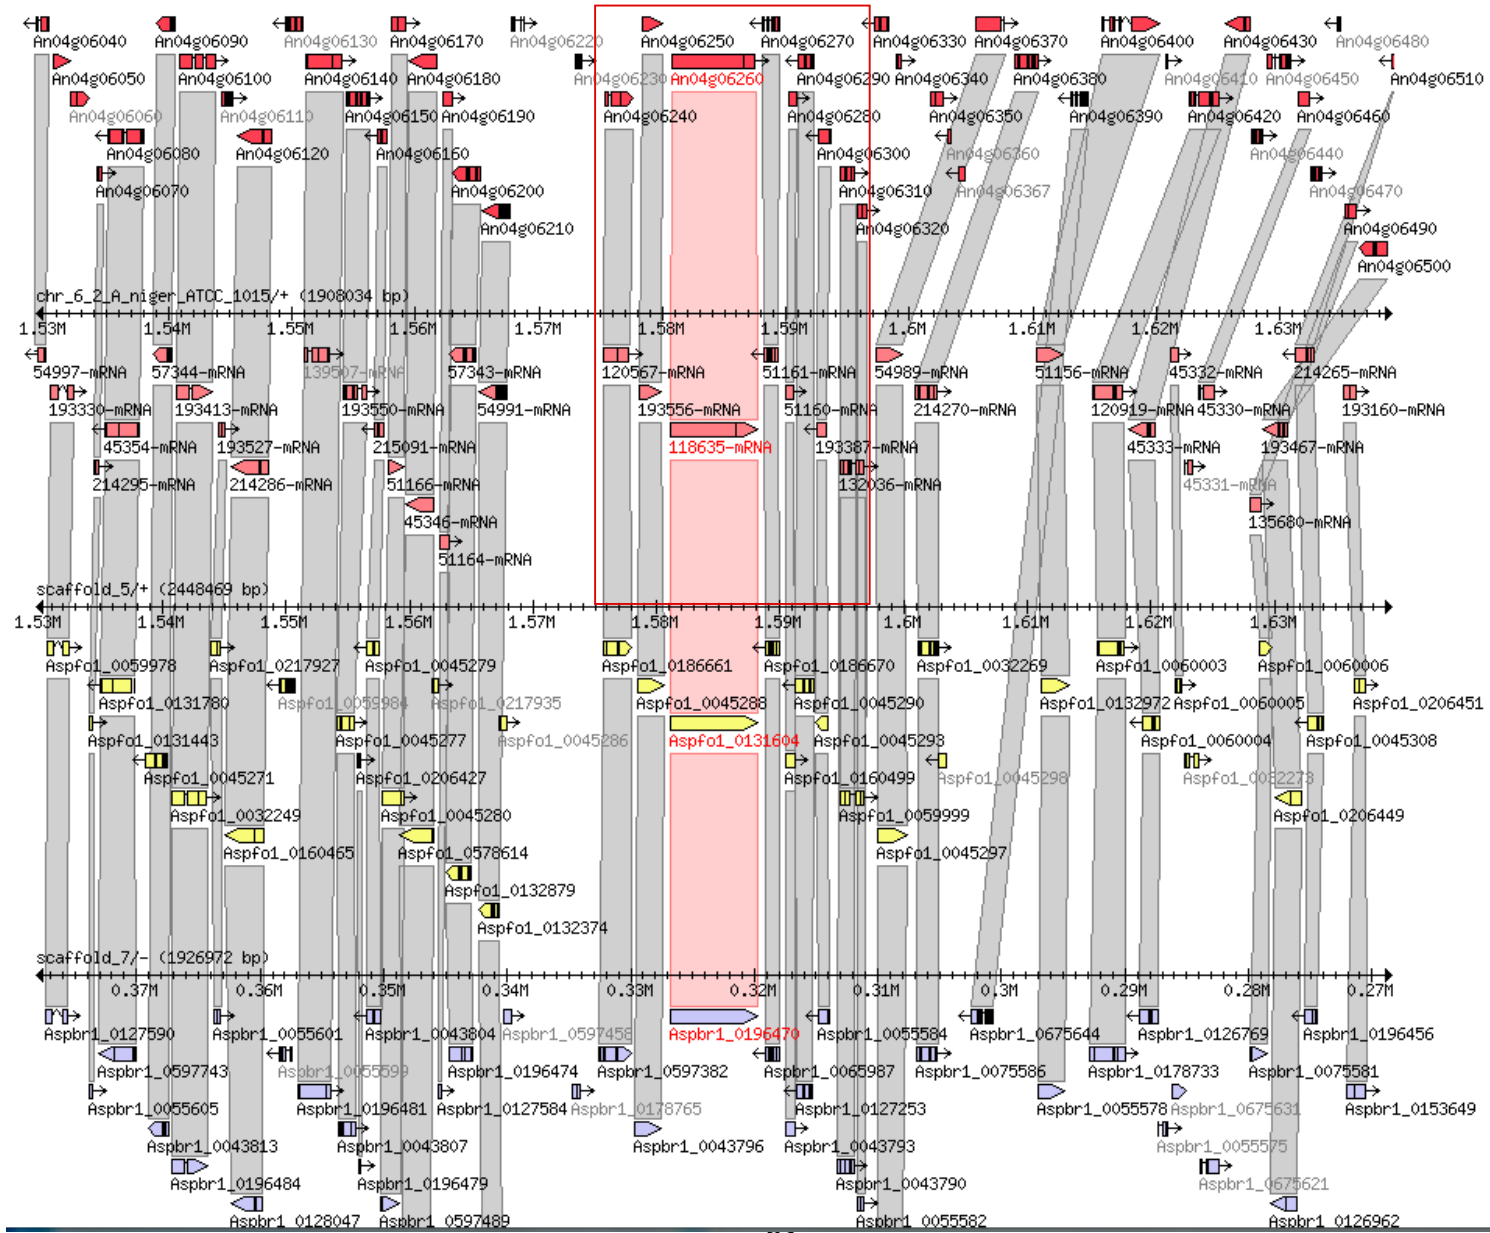

**An04g06260 cluster**

| Gene id (SMURF)   | Gene positions | Gene distance | AspGD name | AspGD description line or supplemental annotation                                                                                                                                                                          | protein ID (antiSMASH) | AspGD ID          |
|-------------------|----------------|---------------|------------|----------------------------------------------------------------------------------------------------------------------------------------------------------------------------------------------------------------------------|------------------------|-------------------|
| n/a               |                |               |            | Ortholog of <i>A. nidulans</i> FGSC A4 : AN1988, <i>A. fumigatus</i> Af293 : Afu4g10490, <i>A. oryzae</i> RIB40 : AO090003001162, <i>A. niger</i> ATCC 1015 : 45346-mRNA and <i>A. versicolor</i> : Aspve1_0025388         | prot_ID_1004           | An04g06180        |
| n/a               |                |               |            | Ortholog(s) have structural constituent of ribosome activity and mitochondrial large ribosomal subunit localization                                                                                                        | prot_ID_812            | An04g06190        |
| n/a               |                |               |            | Has domain(s) with predicted carboxy-lyase activity, pyridoxal phosphate binding activity and role in carboxylic acid metabolic process                                                                                    | prot_ID_908            | An04g06200        |
| n/a               |                |               |            | Homocitrate synthase                                                                                                                                                                                                       | prot_ID_664            | An04g06210        |
| n/a               |                |               |            |                                                                                                                                                                                                                            | prot_ID_245            | An04g06220        |
| An04g06230        | 3              | 1711          |            |                                                                                                                                                                                                                            | prot_ID_794            | An04g06230        |
| An04g06240        | 2              | 820           |            | Ortholog of <i>A. fumigatus</i> Af293 : Afu3g02480, Afu3g15290, Afu4g03670, Afu5g01460 and <i>A. niger</i> CBS 513.88 : An03g02140, An07g05020, An14g01490, An11g08910                                                     | prot_ID_33             | An04g06240 ECS    |
| An04g06250        | 1              | 743           |            | Domain(s) with predicted role in transmembrane transport and integral to membrane localization                                                                                                                             | prot_ID_522            | An04g06250        |
| <b>An04g06260</b> | 0              | 0             |            | Domain(s) with predicted ACP phosphopantetheine attachment site binding involved in fatty acid biosynthetic process, ligase activity, phosphopantetheine binding activity                                                  | <b>prot_ID_529</b>     | <b>An04g06260</b> |
| An04g06270        | -1             | 590           |            | Ortholog of <i>A. nidulans</i> FGSC A4 : AN3975, AN9193, AN2891 and <i>A. fumigatus</i> Af293 : Afu1g10150, Afu2g04380, Afu3g15150, Afu3g15280, Afu6g03300                                                                 | prot_ID_533            | An04g06270        |
| An04g06280        | -2             | 643           |            | Ortholog of <i>A. fumigatus</i> Af293 : Afu3g15240, <i>A. brasiliensis</i> : Aspbr1_0031971, Aspbr1_0043793, <i>N. fischeri</i> NRRL 181 : NFIA_005300, NFIA_061840 and <i>Aspergillus flavus</i> NRRL 3357 : AFL2T_06120  | prot_ID_217            | An04g06280        |
| An04g06290        | -3             | 178           |            | Domain(s) with predicted DNA binding, sequence-specific DNA binding RNA polymerase II transcription factor activity, sequence-specific DNA binding transcription factor activity, zinc ion binding activity                | prot_ID_10             | An04g06290        |
| n/a               |                |               |            | Ortholog of <i>A. fumigatus</i> Af293 : Afu4g10450, <i>A. oryzae</i> RIB40 : AO090003001167, <i>A. versicolor</i> : Aspve1_0465452, <i>A. sydowii</i> : Aspsy1_0084433 and <i>Aspergillus terreus</i> NIH2624 : ATET_00905 | prot_ID_544            | An04g06300        |

|     |                                                                                                                                                                                                                    |             |            |     |
|-----|--------------------------------------------------------------------------------------------------------------------------------------------------------------------------------------------------------------------|-------------|------------|-----|
| n/a | Ortholog of <i>A. nidulans</i> FGSC A4 : AN10255, <i>A. fumigatus</i> Af293 : Afu4g10440, <i>A. oryzae</i> RIB40 : AO090003001168, <i>A. versicolor</i> : Aspve1_0037986 and <i>A. sydowii</i> : Aspsy1_0039153    | prot_ID_242 | An04g06310 |     |
| n/a | Has domain(s) with predicted aminoacyl-tRNA hydrolase activity and role in translation                                                                                                                             | prot_ID_620 | An04g06320 | ECS |
| n/a | Has domain(s) with predicted nucleotide binding activity                                                                                                                                                           | prot_ID_319 | An04g06330 |     |
| n/a | Has domain(s) with predicted isomerase activity and role in cellular aromatic compound metabolic process                                                                                                           | prot_ID_849 | An04g06340 |     |
| n/a | Has domain(s) with predicted 3-beta-hydroxy-delta5-steroid dehydrogenase activity, nucleotide binding activity and role in oxidation-reduction process, steroid biosynthetic process                               | prot_ID_101 | An04g06350 |     |
| n/a |                                                                                                                                                                                                                    | prot_ID_424 | An04g06360 |     |
| n/a |                                                                                                                                                                                                                    | prot_ID_9   | An04g06367 |     |
| n/a | Ortholog of <i>A. nidulans</i> FGSC A4 : AN1992, <i>A. fumigatus</i> Af293 : Afu4g10420, <i>A. oryzae</i> RIB40 : AO090003001170, <i>A. niger</i> ATCC 1015 : 54989-mRNA and <i>A. versicolor</i> : Aspve1_0186037 | prot_ID_286 | An04g06370 |     |

## An04g09530 cluster

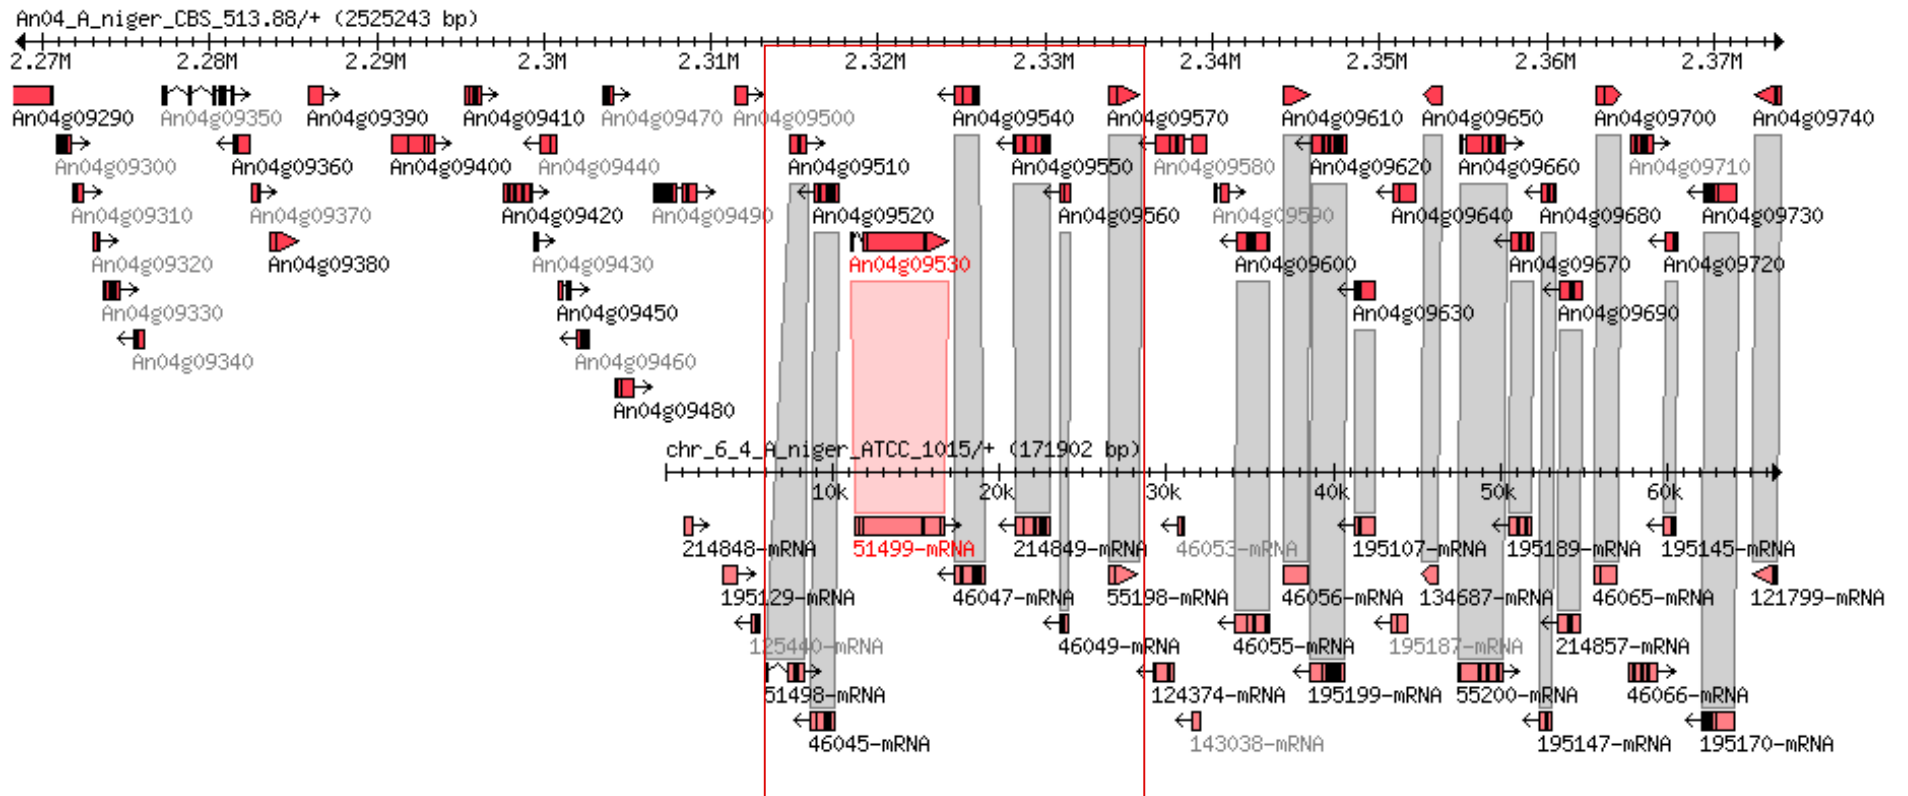

**An04g09530 cluster**

| Gene id (SMURF)   | Gene positions | Gene distance | AspGD name | AspGD description line or supplemental annotation                                                                                                                                                                                 | protein ID (antiSMASH) | AspGD ID          |
|-------------------|----------------|---------------|------------|-----------------------------------------------------------------------------------------------------------------------------------------------------------------------------------------------------------------------------------|------------------------|-------------------|
| n/a               |                |               |            | Ortholog of A. nidulans FGSC A4 : AN2821, A. fumigatus Af293 : Afu2g00180, Afu2g17480, A. niger CBS 513.88 : An03g05360 and A. oryzae RIB40 : AO090102000063, AO090009000716                                                      | prot_ID_915            | An04g09420        |
| n/a               |                |               |            | Protein of unknown function                                                                                                                                                                                                       | prot_ID_730            | An04g09430        |
| n/a               |                |               |            | Protein of unknown function                                                                                                                                                                                                       | prot_ID_779            | An04g09440        |
| n/a               |                |               |            | Ortholog of A. acidus : Aspfo1_0080746                                                                                                                                                                                            | prot_ID_975            | An04g09450        |
| n/a               |                |               |            | Protein of unknown function                                                                                                                                                                                                       | prot_ID_232            | An04g09460        |
| n/a               |                |               |            | Protein of unknown function                                                                                                                                                                                                       | prot_ID_800            | An04g09470        |
| n/a               |                |               |            | Has domain(s) with predicted nucleotide binding, oxidoreductase activity and role in oxidation-reduction process                                                                                                                  | prot_ID_367            | An04g09480        |
| n/a               |                |               |            | Protein of unknown function                                                                                                                                                                                                       | prot_ID_938            | An04g09490        |
| An04g09500        | 3              | 2641          |            | Domain(s) with predicted inositol oxygenase activity, iron ion binding activity, role in inositol catabolic process, oxidation-reduction process and cytoplasm localization                                                       | prot_ID_608            | An04g09500        |
| An04g09510        | 2              | 354           |            | <b>Domain(s) with predicted methyltransferase activity and role in metabolic process</b>                                                                                                                                          | prot_ID_600            | An04g09510 ECS    |
| An04g09520        | 1              | 813           |            | <b>Putative O-methyltransferase</b>                                                                                                                                                                                               | prot_ID_941            | An04g09520        |
| <b>An04g09530</b> | 0              | 0             |            | <b>Ortholog(s) have role in arugosin biosynthetic process, asperthecin biosynthetic process, emodin biosynthetic process, endocrocin biosynthetic process and monodictyphenone biosynthetic process, more</b>                     | <b>prot_ID_434</b>     | <b>An04g09530</b> |
| An04g09540        | -1             | 448           |            | <b>Domain(s) with predicted electron carrier activity, heme binding, iron ion binding, monooxygenase activity, oxidoreductase activity, acting on paired donors, with incorporation or reduction of molecular oxygen activity</b> | prot_ID_572            | An04g09540        |
| An04g09550        | -2             | 2003          |            | <b>Putative 4-hydroxyacetophenone monooxygenase</b>                                                                                                                                                                               | prot_ID_104            | An04g09550        |
| An04g09560        | -3             | 658           |            | <b>Ortholog(s) have extracellular region localization</b>                                                                                                                                                                         | prot_ID_408            | An04g09560        |
| An04g09570        | -4             | 2552          |            | <b>Domain(s) with predicted role in transmembrane transport and integral to membrane localization</b>                                                                                                                             | prot_ID_689            | An04g09570 ECS    |
| An04g09580        | -5             | 850           |            | <b>Domain(s) with predicted transferase activity, transferring phosphorus-containing groups activity</b>                                                                                                                          | prot_ID_476            | An04g09580        |
| An04g09590        | -6             | 598           |            | Protein of unknown function                                                                                                                                                                                                       | prot_ID_524            | An04g09590        |

|            |     |      |                                                                                                                                                                                                                                               |            |            |
|------------|-----|------|-----------------------------------------------------------------------------------------------------------------------------------------------------------------------------------------------------------------------------------------------|------------|------------|
| An04g09600 | -7  | 562  | Ortholog of <i>A. oryzae</i> RIB40 : AO090010000288, <i>A. brasiliensis</i> : Aspbr1_0059125, <i>A. niger</i> ATCC 1015 : 46055-mRNA and <i>Aspergillus aculeatus</i> ATCC16872 : Aacu16872_060894                                            | prot_ID_13 | An04g09600 |
| An04g09610 | -8  | 859  | Ortholog of <i>A. nidulans</i> FGSC A4 : AN3528, <i>A. oryzae</i> RIB40 : AO090113000188, <i>A. brasiliensis</i> : Aspbr1_0162074, <i>A. niger</i> ATCC 1015 : 46056-mRNA and <i>Aspergillus flavus</i> NRRL 3357 : AFL2T_08660               | n/a        | An04g09610 |
| An04g09620 | -9  | 122  | Domain(s) with predicted amino acid transmembrane transporter activity, role in amino acid transmembrane transport and membrane localization                                                                                                  | n/a        | An04g09620 |
| An04g09630 | -10 | 503  | Ortholog of <i>A. nidulans</i> FGSC A4 : AN10915, <i>A. niger</i> CBS 513.88 : An03g01920, <i>A. niger</i> ATCC 1015 : 195107-mRNA, 45712-mRNA and <i>A. versicolor</i> : Aspve1_0513563                                                      | n/a        | An04g09630 |
| An04g09640 | -11 | 1015 | Ortholog of <i>A. nidulans</i> FGSC A4 : AN0196, <i>A. fumigatus</i> Af293 : Afu5g14200, Afu6g13810, Afu8g01720, <i>A. niger</i> CBS 513.88 : An15g02090, <i>A. oryzae</i> RIB40 : AO090003001444 and <i>A. niger</i> ATCC 1015 : 182943-mRNA | n/a        | An04g09640 |
| An04g09650 | -12 | 505  | Domain(s) with predicted catalytic activity                                                                                                                                                                                                   | n/a        | An04g09650 |



## An04g10030 cluster

No manual prediction made

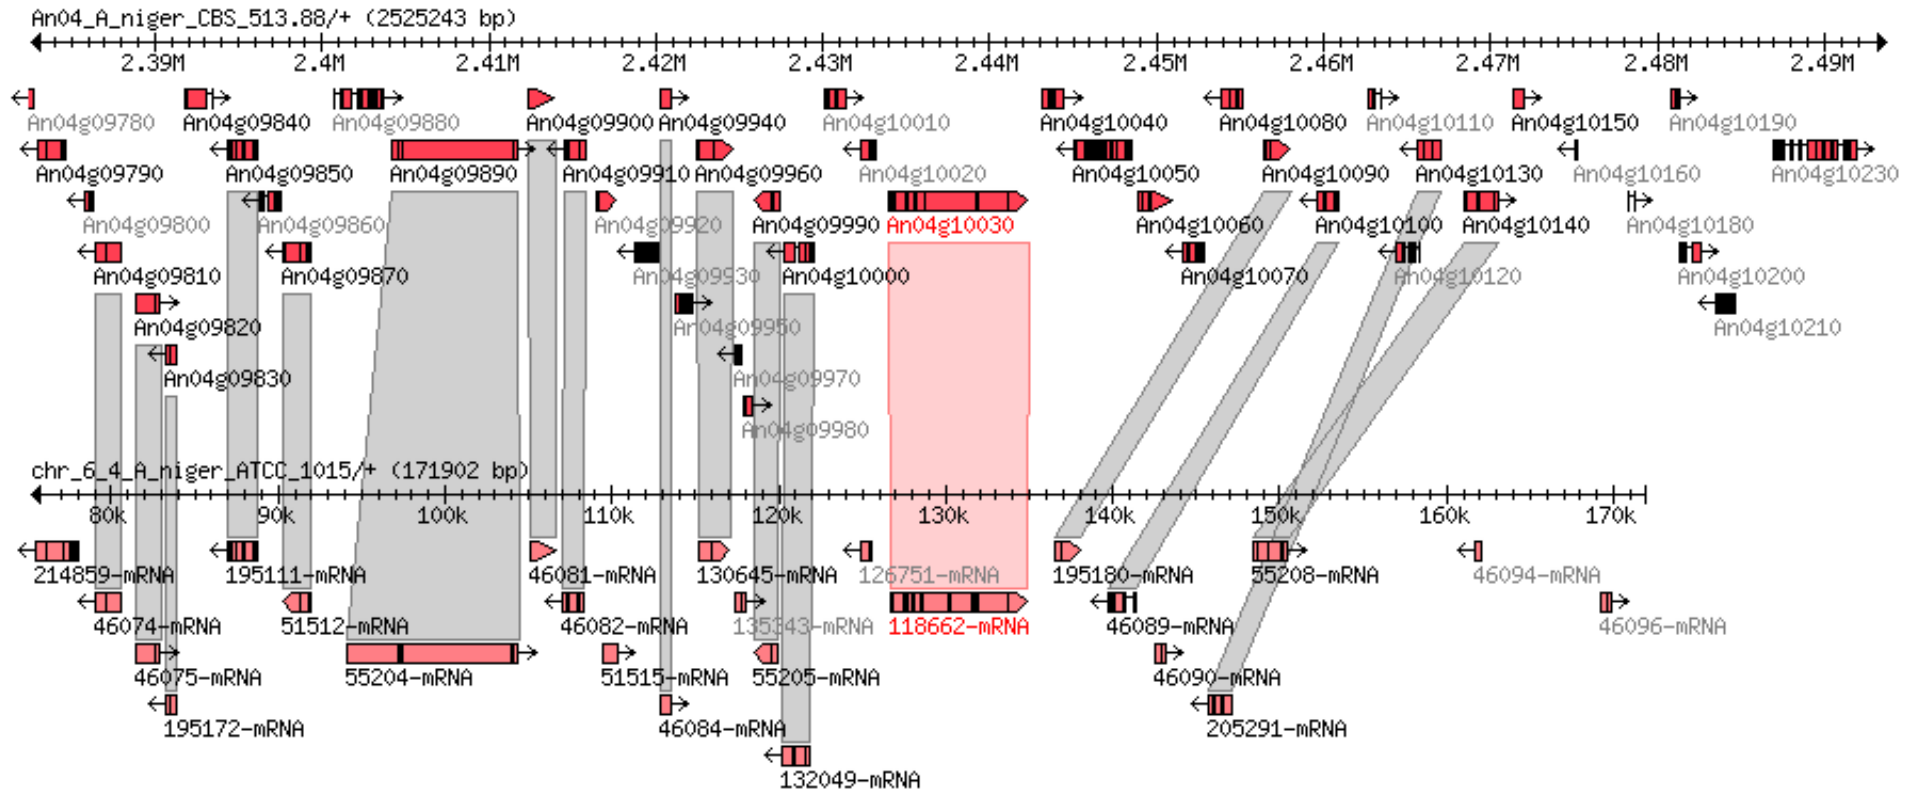

**An04g10030 cluster**

| Gene id (SMURF)   | Gene positions | Gene distance | AspGD name | AspGD description line or supplemental annotation                                                                                                                                                           | protein ID (antiSMASH) | AspGD ID          |
|-------------------|----------------|---------------|------------|-------------------------------------------------------------------------------------------------------------------------------------------------------------------------------------------------------------|------------------------|-------------------|
| An04g09890        | 14             | 755           | agsA       | Putative 1,3-alpha-glucan synthase; induced in the presence of cell wall stress-inducing compounds such as Calcofluor White, SDS, and caspofungin                                                           | n/a                    | An04g09890        |
| An04g09900        | 13             | 408           |            | Domain(s) with predicted transferase activity, transferring phosphorus-containing groups activity                                                                                                           | prot_ID_201            | An04g09900        |
| An04g09910        | 12             | 696           |            | Domain(s) with predicted nucleotide binding, oxidoreductase activity, zinc ion binding activity and role in oxidation-reduction process                                                                     | prot_ID_752            | An04g09910        |
| An04g09920        | 11             | 989           |            | Domain(s) with predicted nucleotide binding, oxidoreductase activity and role in oxidation-reduction process                                                                                                | prot_ID_897            | An04g09920        |
| An04g09930        | 10             | 205           |            | Protein of unknown function                                                                                                                                                                                 | prot_ID_355            | An04g09930        |
| An04g09940        | 9              | 242           |            | Domain(s) with predicted role in cell wall macromolecule catabolic process                                                                                                                                  | prot_ID_401            | An04g09940        |
| An04g09950        | 8              | 179           |            | Protein of unknown function                                                                                                                                                                                 | prot_ID_571            | An04g09950        |
| An04g09960        | 7              | 156           |            | Ortholog of A. brasiliensis : Aspbr1_0661759, A. acidus : Aspfo1_0187220 and A. niger ATCC 1015 : 130645-mRNA                                                                                               | prot_ID_776            | An04g09960        |
| An04g09970        | 6              | 125           |            | Protein of unknown function                                                                                                                                                                                 | prot_ID_74             | An04g09970        |
| An04g09980        | 5              | 230           |            | Protein of unknown function                                                                                                                                                                                 | prot_ID_554            | An04g09980        |
| An04g09990        | 4              | 573           |            | Domain(s) with predicted nucleotide binding, oxidoreductase activity and role in oxidation-reduction process                                                                                                | prot_ID_726            | An04g09990        |
|                   |                |               |            | Domain(s) with predicted transporter activity, role in transmembrane transport and integral to membrane localization                                                                                        |                        |                   |
| An04g10000        | 3              | 682           |            |                                                                                                                                                                                                             | prot_ID_209            | An04g10000        |
| An04g10010        | 2              | 853           |            | Protein of unknown function                                                                                                                                                                                 | prot_ID_22             | An04g10010        |
| An04g10020        | 1              | 679           |            | Protein of unknown function                                                                                                                                                                                 | prot_ID_112            | An04g10020        |
| <b>An04g10030</b> | 0              | 0             |            | Putative polyketide synthase (PKS)                                                                                                                                                                          | <b>prot_ID_145</b>     | <b>An04g10030</b> |
| An04g10040        | -1             | 774           |            | Putative myo-inositol 2-dehydrogenase                                                                                                                                                                       | prot_ID_712            | An04g10040        |
|                   |                |               |            | Domain(s) with predicted DNA binding, sequence-specific DNA binding RNA polymerase II transcription factor activity, sequence-specific DNA binding transcription factor activity, zinc ion binding activity |                        |                   |
| An04g10050        | -2             | 609           |            | Domain(s) with predicted N,N-dimethylaniline monooxygenase activity, NADP binding, flavin adenine dinucleotide binding activity and role in oxidation-reduction process                                     | prot_ID_429            | An04g10050        |
| An04g10060        | -3             | 326           |            |                                                                                                                                                                                                             | prot_ID_997            | An04g10060        |
| An04g10070        | -4             | 669           |            | Glycerol dehydrogenase                                                                                                                                                                                      | prot_ID_758            | An04g10070        |

|            |    |      |                                                                                                                                                                      |             |            |
|------------|----|------|----------------------------------------------------------------------------------------------------------------------------------------------------------------------|-------------|------------|
| An04g10080 | -5 | 929  | Ortholog of <i>A. brasiliensis</i> : Aspbr1_0069169, <i>A. acidus</i> : Aspfo1_0070728, <i>A. versicolor</i> : Aspve1_0151102 and <i>A. sydowii</i> : Aspsy1_0057347 | prot_ID_329 | An04g10080 |
| An04g10090 | -6 | 1212 | Domain(s) with predicted substrate-specific transmembrane transporter activity, role in transmembrane transport and integral to membrane localization                | prot_ID_375 | An04g10090 |
| n/a        |    |      | Ortholog of <i>A. niger</i> ATCC 1015 : 46089-mRNA                                                                                                                   | prot_ID_692 | An04g10100 |

# An05g01060 cluster

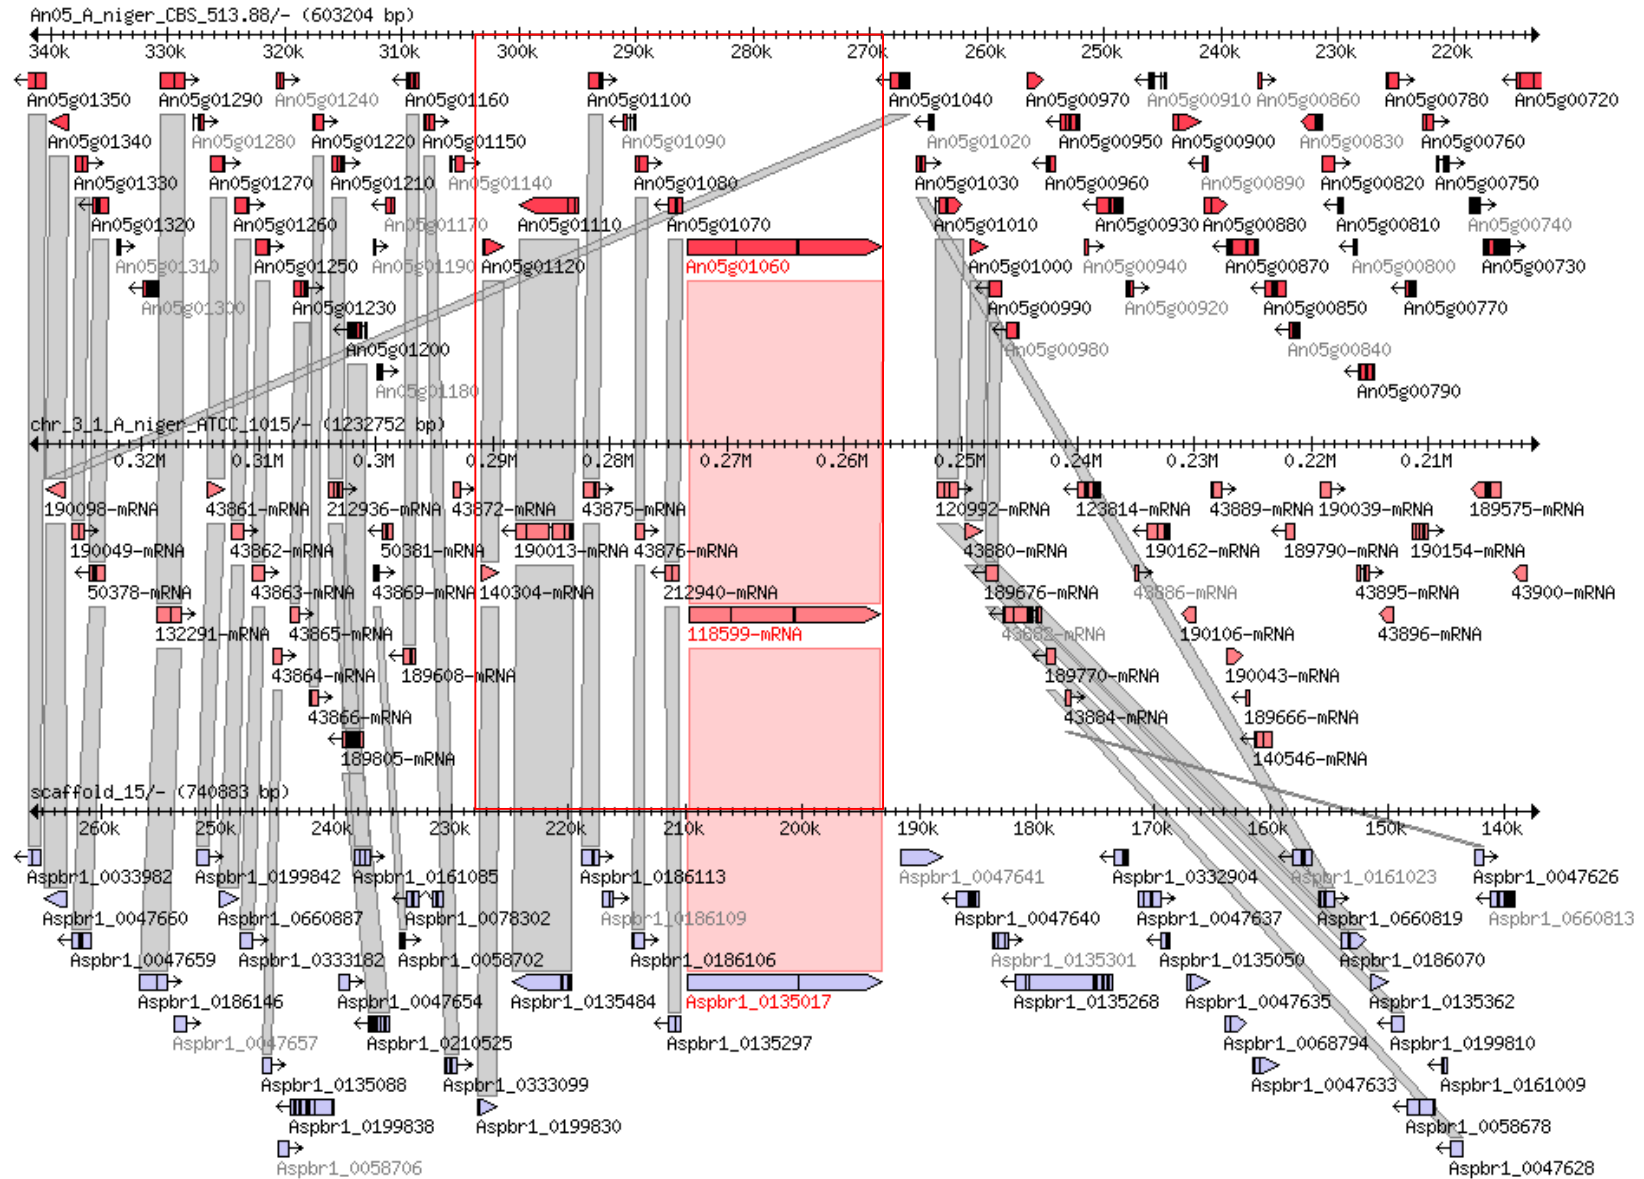

**An05g01060 cluster**

| Gene id (SMURF)   | Gene positions | Gene distance | AspGD name | AspGD description line or supplemental annotation                                                                                                                                                                                    | protein ID (antiSMASH) | AspGD ID              |
|-------------------|----------------|---------------|------------|--------------------------------------------------------------------------------------------------------------------------------------------------------------------------------------------------------------------------------------|------------------------|-----------------------|
| n/a               |                |               |            | Protein similar to mitochondrial malic enzyme (NADP-specific); expression repressed by tunicamycin and DTT                                                                                                                           | prot_ID_26             | An05g00930            |
| n/a               |                |               |            |                                                                                                                                                                                                                                      | prot_ID_64             | An05g00940            |
| n/a               |                |               |            | Domain(s) with predicted FMN binding, oxidoreductase activity and role in oxidation-reduction process                                                                                                                                | prot_ID_160            | An05g00950            |
| n/a               |                |               |            | Domain(s) with predicted rRNA binding activity and intracellular localization                                                                                                                                                        | prot_ID_5              | An05g00960            |
| n/a               |                |               |            | Ortholog of <i>A. nidulans</i> FGSC A4 : AN6172, <i>A. fumigatus</i> Af293 : Afu2g08340, <i>A. oryzae</i> RIB40 : AO090011000871, <i>A. versicolor</i> : Aspve1_0028126 and <i>A. sydowii</i> : Aspsy1_0151670                       | prot_ID_149            | An05g00970            |
| n/a               |                |               |            | Domain(s) with predicted DNA binding, zinc ion binding activity, role in transcription, DNA-dependent and nucleus localization                                                                                                       | prot_ID_217            | An05g00980            |
| n/a               |                |               |            | Domain(s) with predicted oxidoreductase activity and role in oxidation-reduction process                                                                                                                                             | prot_ID_201            | An05g00990            |
| n/a               |                |               |            | Domain(s) with predicted catalytic activity and role in nucleoside metabolic process                                                                                                                                                 | prot_ID_34             | An05g01000            |
| n/a               |                |               |            | Domain(s) with predicted phospholipase activity and role in phospholipid catabolic process                                                                                                                                           | prot_ID_196            | An05g01010            |
| An05g01020        | 3              | 195           |            |                                                                                                                                                                                                                                      | prot_ID_178            | An05g01020            |
| An05g01030        | 2              | 622           |            | Ortholog of <i>A. nidulans</i> FGSC A4 : AN9205, <i>A. fumigatus</i> Af293 : Afu5g00100, Afu7g06523, <i>A. niger</i> CBS 513.88 : An16g01380, <i>A. oryzae</i> RIB40 : AO090011000069 and <i>A. niger</i> ATCC 1015 : 41357-mRNA     | prot_ID_16             | An05g01030            |
| An05g01040        | 1              | 821           |            | Domain(s) with predicted 4 iron, 4 sulfur cluster binding, endonuclease activity and sequence-specific DNA binding                                                                                                                   | prot_ID_181            | An05g01040            |
| <b>An05g01060</b> | 0              | 0             |            | RNA polymerase II transcription factor activity, more<br><b>Putative nonribosomal peptide synthase (NRPS)</b>                                                                                                                        | <b>prot_ID_63</b>      | <b>An05g01060</b> ECS |
| An05g01070        | -1             | 643           |            | Domain(s) with predicted role in response to stress and integral to membrane localization                                                                                                                                            | prot_ID_14             | An05g01070            |
| An05g01080        | -2             | 1761          |            | Ortholog of <i>A. niger</i> CBS 513.88 : An06g00960, <i>A. oryzae</i> RIB40 : AO090003001547, <i>A. brasiliensis</i> : Aspbr1_0186106, <i>Aspergillus flavus</i> NRRL 3357 : AFL2T_01548 and <i>A. clavatus</i> NRRL 1 : ACLA_003370 | prot_ID_224            | An05g01080            |
| An05g01090        | -3             | 137           |            | Questionable ORF                                                                                                                                                                                                                     | prot_ID_126            | An05g01090            |

|            |    |      |                                                                                                                                                                                                                                            |             |            |     |
|------------|----|------|--------------------------------------------------------------------------------------------------------------------------------------------------------------------------------------------------------------------------------------------|-------------|------------|-----|
| An05g01100 | -4 | 1797 | Domain(s) with predicted branched-chain-amino-acid transaminase activity and role in branched-chain amino acid metabolic process                                                                                                           | prot_ID_221 | An05g01100 |     |
| An05g01110 | -5 | 855  | Domain(s) with predicted ATP binding, ATPase activity, coupled to transmembrane movement of substances activity, role in transmembrane transport and integral to membrane localization                                                     | prot_ID_140 | An05g01110 |     |
| An05g01120 | -6 | 1415 | Domain(s) with predicted electron carrier activity, heme binding, iron ion binding, oxidoreductase activity, acting on paired donors, with incorporation or reduction of molecular oxygen activity and role in oxidation-reduction process | prot_ID_155 | An05g01120 | ECS |
| n/a        |    |      | Protein of unknown function                                                                                                                                                                                                                | prot_ID_118 | An05g01140 |     |

# An06g01300 cluster

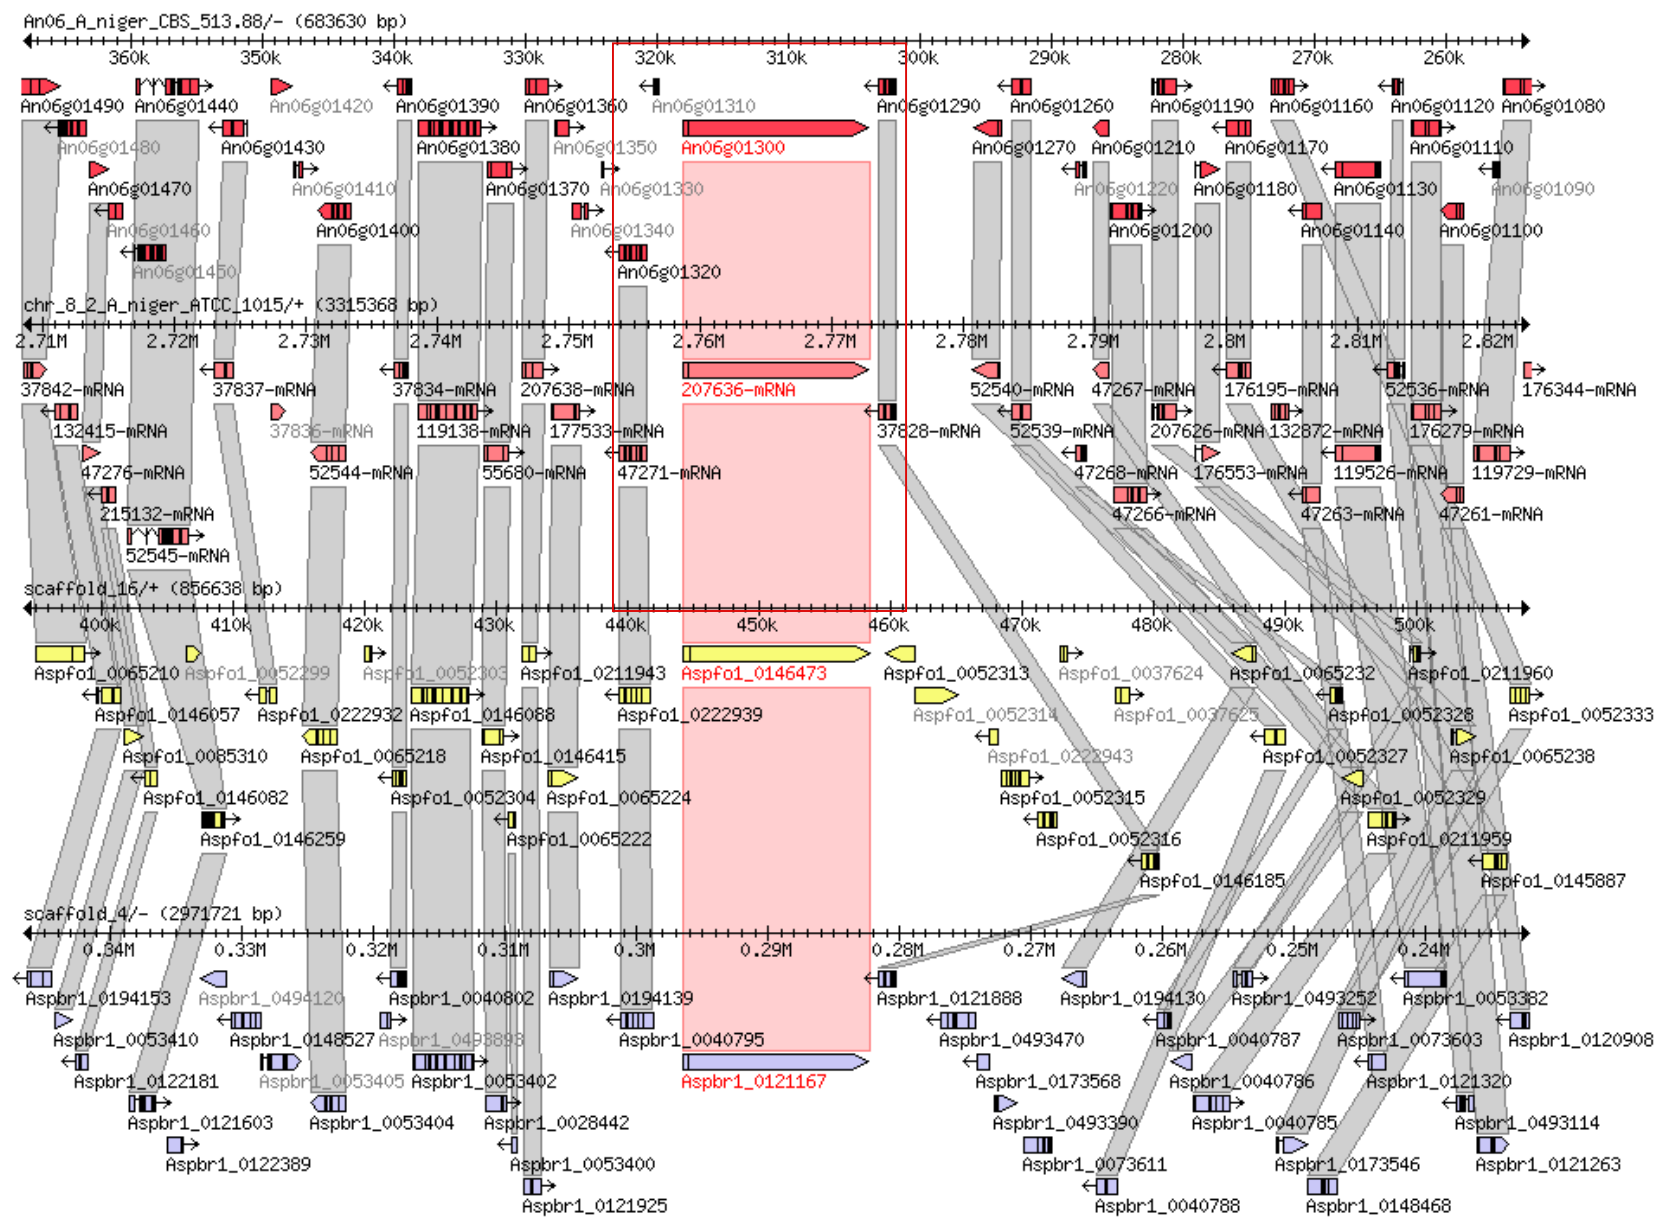

**An06g01300 cluster**

| Gene id (SMURF)   | Gene positions | Gene distance | AspGD name | AspGD description line or supplemental annotation                                                                                                                                                                                                                                                                                | protein ID (antiSMASH)   | AspGD ID                 |
|-------------------|----------------|---------------|------------|----------------------------------------------------------------------------------------------------------------------------------------------------------------------------------------------------------------------------------------------------------------------------------------------------------------------------------|--------------------------|--------------------------|
| n/a               |                |               |            | Conserved endosomal membrane protein; expression enhanced by maltose<br>Ortholog of A. nidulans FGSC A4 : AN5340, A. fumigatus Af293 : Afu6g14260/lcp5, A. oryzae RIB40 : AO090103000410, A. niger ATCC 1015 : 47267-mRNA and A. versicolor : Aspve1_0044728                                                                     | prot_ID_220              | An06g01200               |
| n/a               |                |               |            | Protein of unknown function<br>Ortholog of A. nidulans FGSC A4 : AN0600, A. fumigatus Af293 : Afu6g10940, A. oryzae RIB40 : AO090023000524, A. niger ATCC 1015 : 52539-mRNA and A. versicolor : Aspve1_0058576                                                                                                                   | prot_ID_236<br>prot_ID_9 | An06g01210<br>An06g01220 |
| n/a               |                |               |            | Protein of unknown function                                                                                                                                                                                                                                                                                                      | prot_ID_138              | An06g01260               |
| n/a               |                |               |            | Protein of unknown function                                                                                                                                                                                                                                                                                                      | prot_ID_167              | An06g01270               |
| An06g01290        | 1              | 650           |            | <b>Ortholog of A. nidulans FGSC A4 : AN6413, AN8328, AN3395, AN3241, AN10369, AN1930, AN2386, AN1738, AN9266, AN10886, AN7232, AN7406, AN7774, AN12202</b><br><b>Ortholog(s) have role in cellular response to oxidative stress, ferricrocin biosynthetic process, intracellular sequestering of iron ion, iron assimilation</b> | prot_ID_213              | An06g01290 ECS           |
| <b>An06g01300</b> | 0              | 0             |            |                                                                                                                                                                                                                                                                                                                                  | <b>prot_ID_221</b>       | <b>An06g01300</b>        |
| An06g01310        | -1             | 1836          |            | Protein of unknown function<br><b>Ortholog(s) have role in N',N'',N'''-triacylfusarinine C biosynthetic process, cellular response to hydrogen peroxide, cellular response to iron ion starvation and ergosterol biosynthetic process, more</b>                                                                                  | prot_ID_153              | An06g01310               |
| An06g01320        | -2             | 533           |            | Protein of unknown function                                                                                                                                                                                                                                                                                                      | prot_ID_115              | An06g01320 ECS           |
| An06g01330        | -3             | 1086          |            | Protein of unknown function                                                                                                                                                                                                                                                                                                      | prot_ID_108              | An06g01330               |
| An06g01340        | -4             | 945           |            | Protein of unknown function                                                                                                                                                                                                                                                                                                      | prot_ID_223              | An06g01340               |
| An06g01350        | -5             | 103           |            | Protein of unknown function<br>Ortholog of A. nidulans FGSC A4 : AN5668, A. fumigatus Af293 : Afu4g13740, A. oryzae RIB40 : AO090009000197, A. niger ATCC 1015 : 207638-mRNA and A. versicolor : Aspve1_0132964                                                                                                                  | prot_ID_179              | An06g01350               |
| An06g01360        | -6             | 759           |            | 3-oxoadipate CoA transferase                                                                                                                                                                                                                                                                                                     | prot_ID_42               | An06g01360               |
| An06g01370        | -7             | 1237          |            | Domain(s) with predicted ubiquitin thiolesterase activity and role in ubiquitin-dependent protein catabolic process                                                                                                                                                                                                              | prot_ID_10               | An06g01370               |
| An06g01380        | -8             | 985           |            | NADH-ubiquinone oxidoreductase; respiratory-chain                                                                                                                                                                                                                                                                                | prot_ID_228              | An06g01380               |
| An06g01390        | -9             | 541           |            | NADH dehydrogenase                                                                                                                                                                                                                                                                                                               | prot_ID_80               | An06g01390               |
| An06g01400        | -10            | 3785          |            | Domain(s) with predicted phospholipid binding activity                                                                                                                                                                                                                                                                           | n/a                      | An06g01400               |
| An06g01410        | -11            | 939           |            | Protein of unknown function                                                                                                                                                                                                                                                                                                      | n/a                      | An06g01410               |



# An07g01030 cluster

No manual prediction made

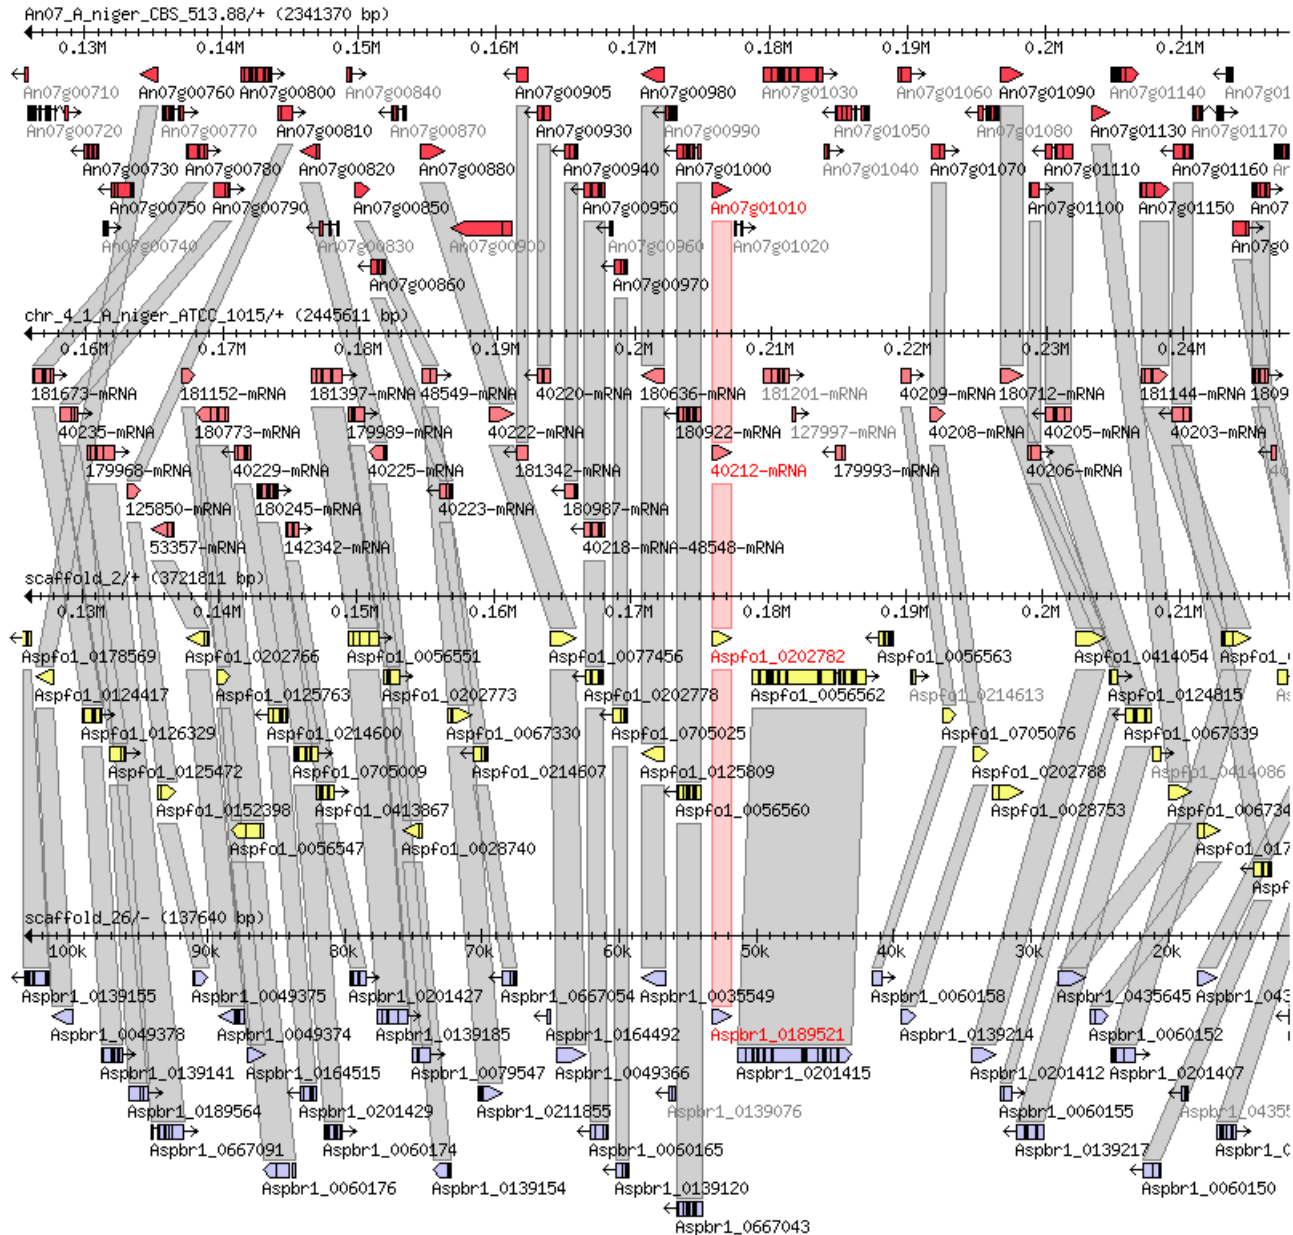

**An07g01030 cluster**

| Gene id (SMURF)   | Gene positions | Gene distance | AspGD name | AspGD description line or supplemental annotation                                                                                                                                             | protein ID (antiSMASH) | AspGD ID          |
|-------------------|----------------|---------------|------------|-----------------------------------------------------------------------------------------------------------------------------------------------------------------------------------------------|------------------------|-------------------|
| An07g00900        | 12             | 378           |            | Ortholog(s) have mitochondrion localization                                                                                                                                                   | prot_ID_626            | An07g00900        |
| An07g00905        | 11             | 597           |            | Ortholog of A. nidulans FGSC A4 : AN9483, A. fumigatus Af293 : Afu3g00670, Afu8g01120, A. niger CBS 513.88 : An03g01130, A. oryzae RIB40 : AO090113000089 and A. niger ATCC 1015 : 55131-mRNA | prot_ID_510            | An07g00905        |
| An07g00930        | 10             | 1036          |            | Domain(s) with predicted hydrolase activity                                                                                                                                                   | prot_ID_898            | An07g00930        |
| An07g00940        | 9              | 603           |            | Ortholog of A. niger ATCC 1015 : 180987-mRNA                                                                                                                                                  | prot_ID_524            | An07g00940        |
| An07g00950        | 8              | 390           |            | Domain(s) with predicted aspartic-type endopeptidase activity and role in proteolysis                                                                                                         | prot_ID_261            | An07g00950        |
| An07g00960        | 7              | 151           |            | Protein of unknown function                                                                                                                                                                   | prot_ID_885            | An07g00960        |
| An07g00970        | 6              | 986           |            | Domain(s) with predicted role in response to stress and integral to membrane localization                                                                                                     | prot_ID_245            | An07g00970        |
| An07g00980        | 5              | 30            |            | Domain(s) with predicted role in transmembrane transport and integral to membrane localization                                                                                                | prot_ID_238            | An07g00980        |
| An07g00990        | 4              | 30            |            | Protein of unknown function                                                                                                                                                                   | prot_ID_367            | An07g00990        |
| An07g01000        | 3              | 730           |            | Domain(s) with predicted polygalacturonase activity and role in carbohydrate metabolic process                                                                                                | prot_ID_483            | An07g01000        |
| An07g01010        | 2              | 253           |            | Domain(s) with predicted sulfuric ester hydrolase activity and role in metabolic process                                                                                                      | prot_ID_982            | An07g01010        |
| An07g01020        | 1              | 1458          |            | Protein of unknown function                                                                                                                                                                   | prot_ID_317            | An07g01020        |
| <b>An07g01030</b> | 0              | 0             |            | Domain(s) with predicted transferase activity and role in biosynthetic process                                                                                                                | <b>prot_ID_888</b>     | <b>An07g01030</b> |
| An07g01040        | -1             | 25            |            | Domain(s) with predicted ACP phosphopantetheine attachment site binding involved in fatty acid biosynthetic process activity                                                                  | prot_ID_969            | An07g01040        |
| An07g01050        | -2             | 347           |            | Protein of unknown function                                                                                                                                                                   | prot_ID_672            | An07g01050        |
| An07g01060        | -3             | 2058          |            | Domain(s) with predicted role in cell wall macromolecule catabolic process                                                                                                                    | prot_ID_361            | An07g01060        |
| An07g01070        | -4             | 1422          |            | Domain(s) with predicted ATP binding, protein kinase activity and role in protein phosphorylation                                                                                             | prot_ID_993            | An07g01070        |
| An07g01080        | -5             | 2364          |            | Protein of unknown function                                                                                                                                                                   | prot_ID_557            | An07g01080        |
| An07g01090        | -6             | 34            |            | Domain(s) with predicted role in transmembrane transport and integral to membrane localization                                                                                                | prot_ID_74             | An07g01090        |
| An07g01100        | -7             | 447           |            | Ortholog of A. nidulans FGSC A4 : AN3299, A. fumigatus Af293 : Afu2g00590, A. oryzae RIB40 : AO090103000485, A. niger ATCC 1015 : 40206-mRNA and A. versicolor :                              | prot_ID_133            | An07g01100        |

Aspve1\_0027550

|     |                                                                                                               |             |            |
|-----|---------------------------------------------------------------------------------------------------------------|-------------|------------|
| n/a | Domain(s) with predicted transferase activity, transferring hexosyl groups activity                           | prot_ID_938 | An07g01110 |
| n/a | Domain(s) with predicted transferase activity, transferring acyl groups other than amino-acyl groups activity | prot_ID_455 | An07g01130 |

# An07g02560 cluster

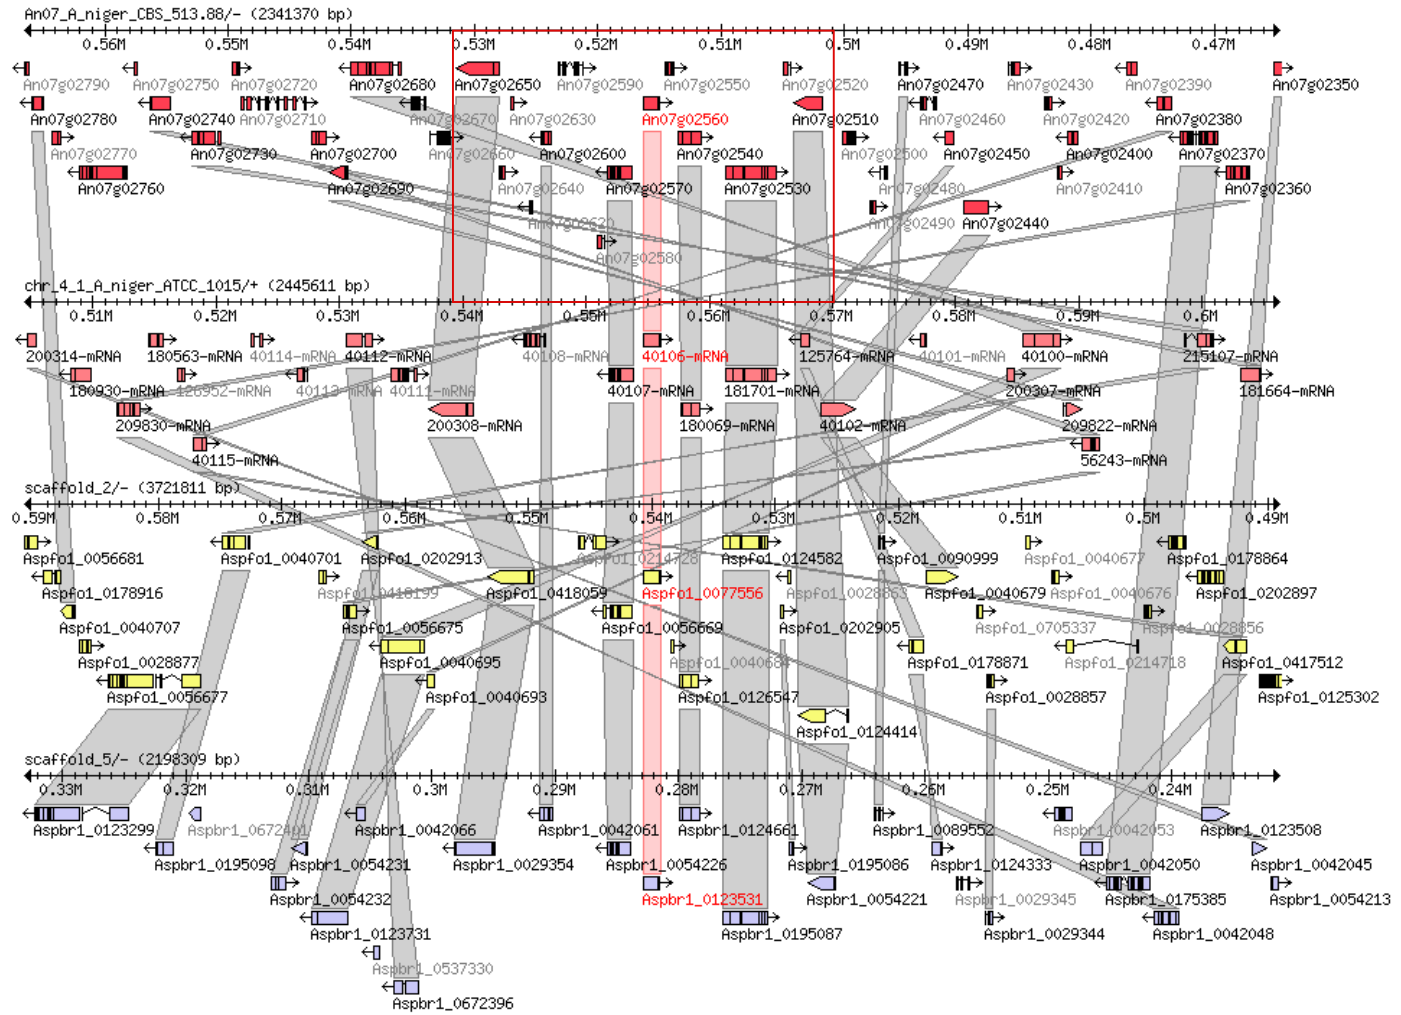

**An07g02560 cluster**

| Gene id (SMURF)   | Gene positions | Gene distance | AspGD name | AspGD description line or supplemental annotation                                                                                                                                                                                          | protein ID (antiSMASH) | AspGD ID          |     |
|-------------------|----------------|---------------|------------|--------------------------------------------------------------------------------------------------------------------------------------------------------------------------------------------------------------------------------------------|------------------------|-------------------|-----|
| n/a               |                |               |            | Protein of unknown function                                                                                                                                                                                                                | n/a                    | An07g02510        | ECS |
| n/a               |                |               |            | Protein of unknown function                                                                                                                                                                                                                | prot_ID_563            | An07g02520        |     |
|                   |                |               |            | Domain(s) with predicted hydrolase activity, acting on ester bonds activity, role in GPI anchor metabolic process, intracellular protein transport and intrinsic to endoplasmic reticulum membrane localization                            | prot_ID_761            | An07g02530        |     |
| n/a               |                |               |            | Domain(s) with predicted transmembrane transporter activity, role in transmembrane transport and integral to membrane localization                                                                                                         | prot_ID_70             | An07g02540        |     |
| An07g02540        | 2              | 362           |            | Weak similarity to DNA dependent ATPase/DNA helicase B                                                                                                                                                                                     | prot_ID_485            | An07g02550        |     |
| An07g02550        | 1              | 356           |            | Ortholog(s) have dimethylallyltransferase activity, peptidase activity, tryptophan dimethylallyltransferase activity                                                                                                                       | <b>prot_ID_651</b>     | <b>An07g02560</b> |     |
| <b>An07g02560</b> | <b>0</b>       | <b>0</b>      |            | Domain(s) with predicted electron carrier activity, heme binding, iron ion binding, oxidoreductase activity, acting on paired donors, with incorporation or reduction of molecular oxygen activity and role in oxidation-reduction process | prot_ID_91             | An07g02570        |     |
| An07g02570        | -1             | 954           |            | Protein of unknown function                                                                                                                                                                                                                | prot_ID_75             | An07g02580        |     |
| An07g02580        | -2             | 245           |            | Protein of unknown function                                                                                                                                                                                                                | prot_ID_837            | An07g02590        |     |
| An07g02590        | -3             | 1055          |            | Ortholog of A. nidulans FGSC A4 : AN6701, A. fumigatus Af293 : Afu7g05650, A. oryzae RIB40 : AO090005000427, A. versicolor : Aspve1_0056558 and A. sydowii : Aspsy1_0034940                                                                | prot_ID_998            | An07g02600        |     |
| An07g02600        | -4             | 649           |            | Protein of unknown function                                                                                                                                                                                                                | prot_ID_193            | An07g02620        |     |
| An07g02620        | -5             | 694           |            | Protein of unknown function                                                                                                                                                                                                                | n/a                    | An07g02630        |     |
| An07g02630        | -6             | 1189          |            | Protein of unknown function                                                                                                                                                                                                                | n/a                    | An07g02640        |     |
| An07g02640        | -7             | 394           |            | Protein similar to translation elongation factor 3                                                                                                                                                                                         | n/a                    | An07g02650        | ECS |
| An07g02650        | -8             | 283           |            |                                                                                                                                                                                                                                            |                        |                   |     |

# An08g02310 cluster

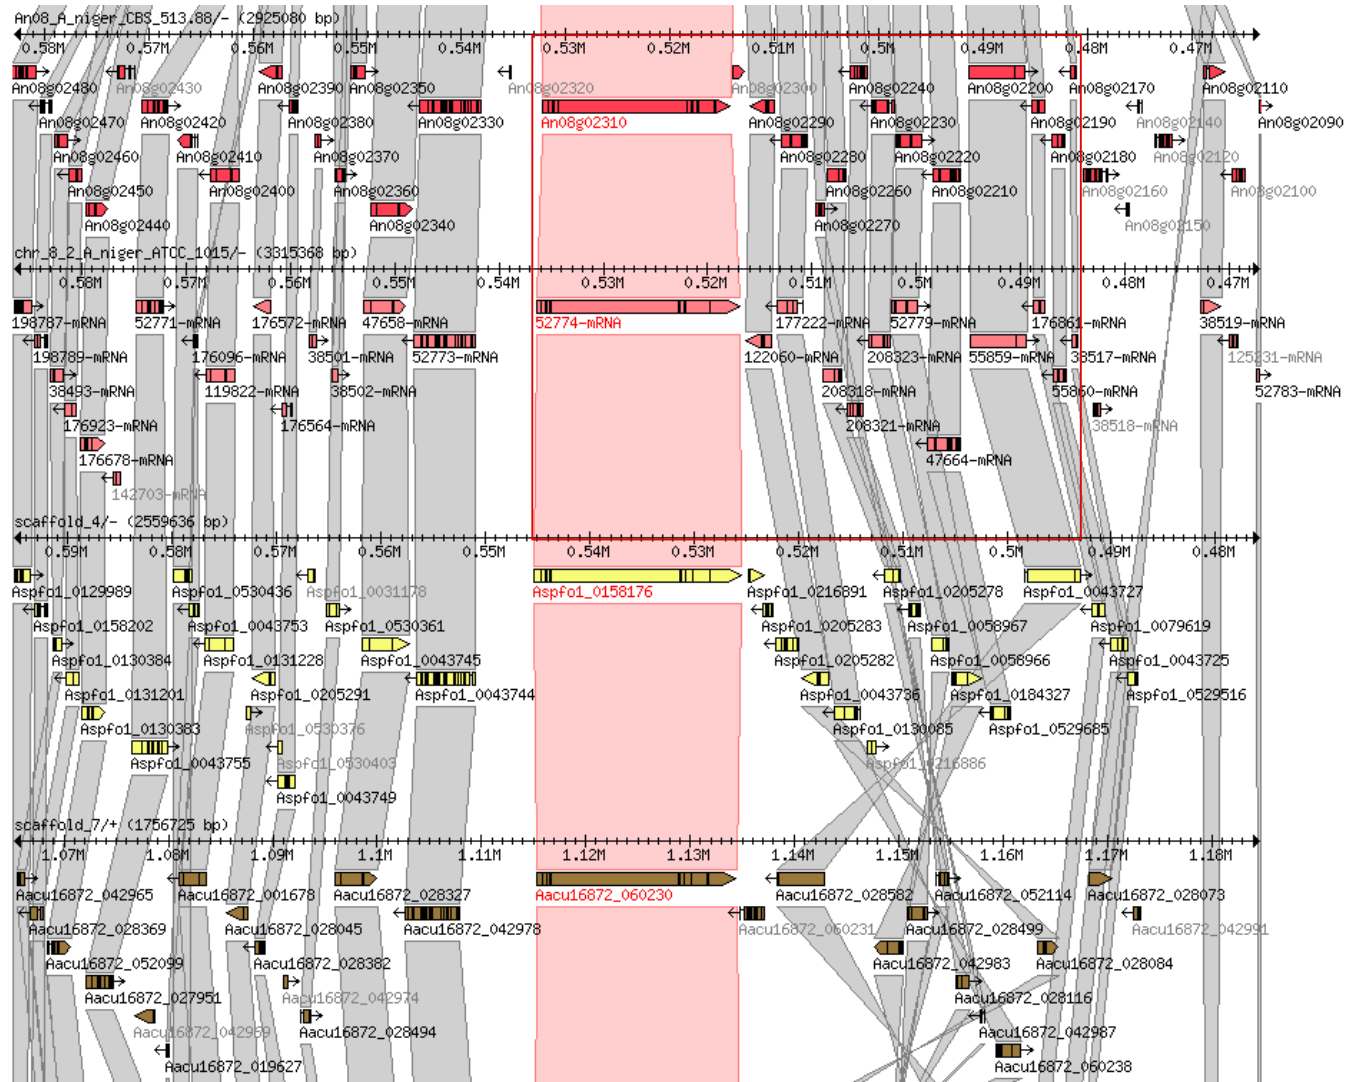

**An08g02310 cluster**

| Gene id (SMURF)   | Gene positions | Gene distance | AspGD name | AspGD description line or supplemental annotation                                                                                                                                   | protein ID (antiSMASH) | AspGD ID          |     |
|-------------------|----------------|---------------|------------|-------------------------------------------------------------------------------------------------------------------------------------------------------------------------------------|------------------------|-------------------|-----|
| n/a               |                |               |            | Protein of unknown function                                                                                                                                                         | n/a                    | An08g02170        | ECS |
| An08g02180        | 12             | 748           |            | Domain(s) with predicted oxidoreductase activity and role in oxidation-reduction process                                                                                            | n/a                    | An08g02180        |     |
| An08g02190        | 11             | 1362          |            | Domain(s) with predicted nucleic acid binding, zinc ion binding activity and intracellular localization                                                                             | n/a                    | An08g02190        |     |
| An08g02200        | 10             | 855           |            | Domain(s) with predicted ATP binding, DNA binding, helicase activity and nucleus localization                                                                                       | n/a                    | An08g02200        |     |
| An08g02210        | 9              | 932           |            | Domain(s) with predicted ATP binding, ATPase activity, electron carrier activity, iron-sulfur cluster binding activity                                                              | prot_ID_236            | An08g02210        |     |
| An08g02220        | 8              | 345           |            | Ortholog of A. nidulans FGSC A4 : AN1249, A. fumigatus Af293 : Afu1g10320, A. oryzae RIB40 : AO090038000398, A. niger ATCC 1015 : 52779-mRNA and A. versicolor : Aspve1_0119203     | prot_ID_341            | An08g02220        |     |
| An08g02230        | 7              | 887           |            | Ortholog of A. fumigatus Af293 : Afu1g10330, A. oryzae RIB40 : AO090038000397, A. niger ATCC 1015 : 208323-mRNA, A. versicolor : Aspve1_0079224 and A. sydowii : Aspsy1_0141143     | prot_ID_817            | An08g02230        |     |
| An08g02240        | 6              | 800           |            | Domain(s) with predicted integral to membrane localization                                                                                                                          | prot_ID_1094           | An08g02240        |     |
| An08g02260        | 5              | 700           | pgkA       | Phosphoglycerate kinase                                                                                                                                                             | prot_ID_1043           | An08g02260        |     |
| An08g02270        | 4              | 929           |            | Ortholog of A. nidulans FGSC A4 : AN1245, A. fumigatus Af293 : Afu1g10355, A. versicolor : Aspve1_0036926, A. sydowii : Aspsy1_0053120 and Aspergillus terreus NIH2624 : ATET_00225 | prot_ID_784            | An08g02270        |     |
| An08g02280        | 3              | 920           |            | Ortholog(s) have cytoplasm, nucleus localization                                                                                                                                    | prot_ID_663            | An08g02280        |     |
| An08g02290        | 2              | 1105          |            | Domain(s) with predicted role in transmembrane transport and integral to membrane localization                                                                                      | prot_ID_28             | An08g02290        |     |
| An08g02300        | 1              | 129           |            | Domain(s) with predicted ACP phosphopantetheine attachment site binding involved in fatty acid biosynthetic process activity                                                        | prot_ID_1128           | An08g02300        |     |
| <b>An08g02310</b> | 0              | 0             |            | Ortholog(s) have role in cellular response to drug, fumigaclavine C biosynthetic process, fungal-type cell wall organization                                                        | <b>prot_ID_411</b>     | <b>An08g02310</b> | ECS |
| An08g02320        | -1             | 3013          |            | Protein of unknown function                                                                                                                                                         | prot_ID_881            | An08g02320        |     |
| An08g02330        | -2             | 2731          |            | Putative ABC multidrug transporter                                                                                                                                                  | prot_ID_520            | An08g02330        |     |
| n/a               |                |               |            | Ortholog(s) have nuclear pore, spindle pole body localization                                                                                                                       | prot_ID_822            | An08g02340        |     |

|     |                                                                                                                                                                                                                    |              |            |
|-----|--------------------------------------------------------------------------------------------------------------------------------------------------------------------------------------------------------------------|--------------|------------|
| n/a | Ortholog(s) have role in double-strand break repair via homologous recombination, mitotic recombination and nucleus localization                                                                                   | prot_ID_41   | An08g02350 |
| n/a | Ortholog of <i>A. nidulans</i> FGSC A4 : AN1236, <i>A. brasiliensis</i> : Aspbr1_0064545, <i>N. fischeri</i> NRRL 181 : NFIA_015250, <i>A. clavatus</i> NRRL 1 : ACLA_025120 and <i>A. acidus</i> : Aspfo1_0530361 | prot_ID_1019 | An08g02360 |



## An08g03790 cluster

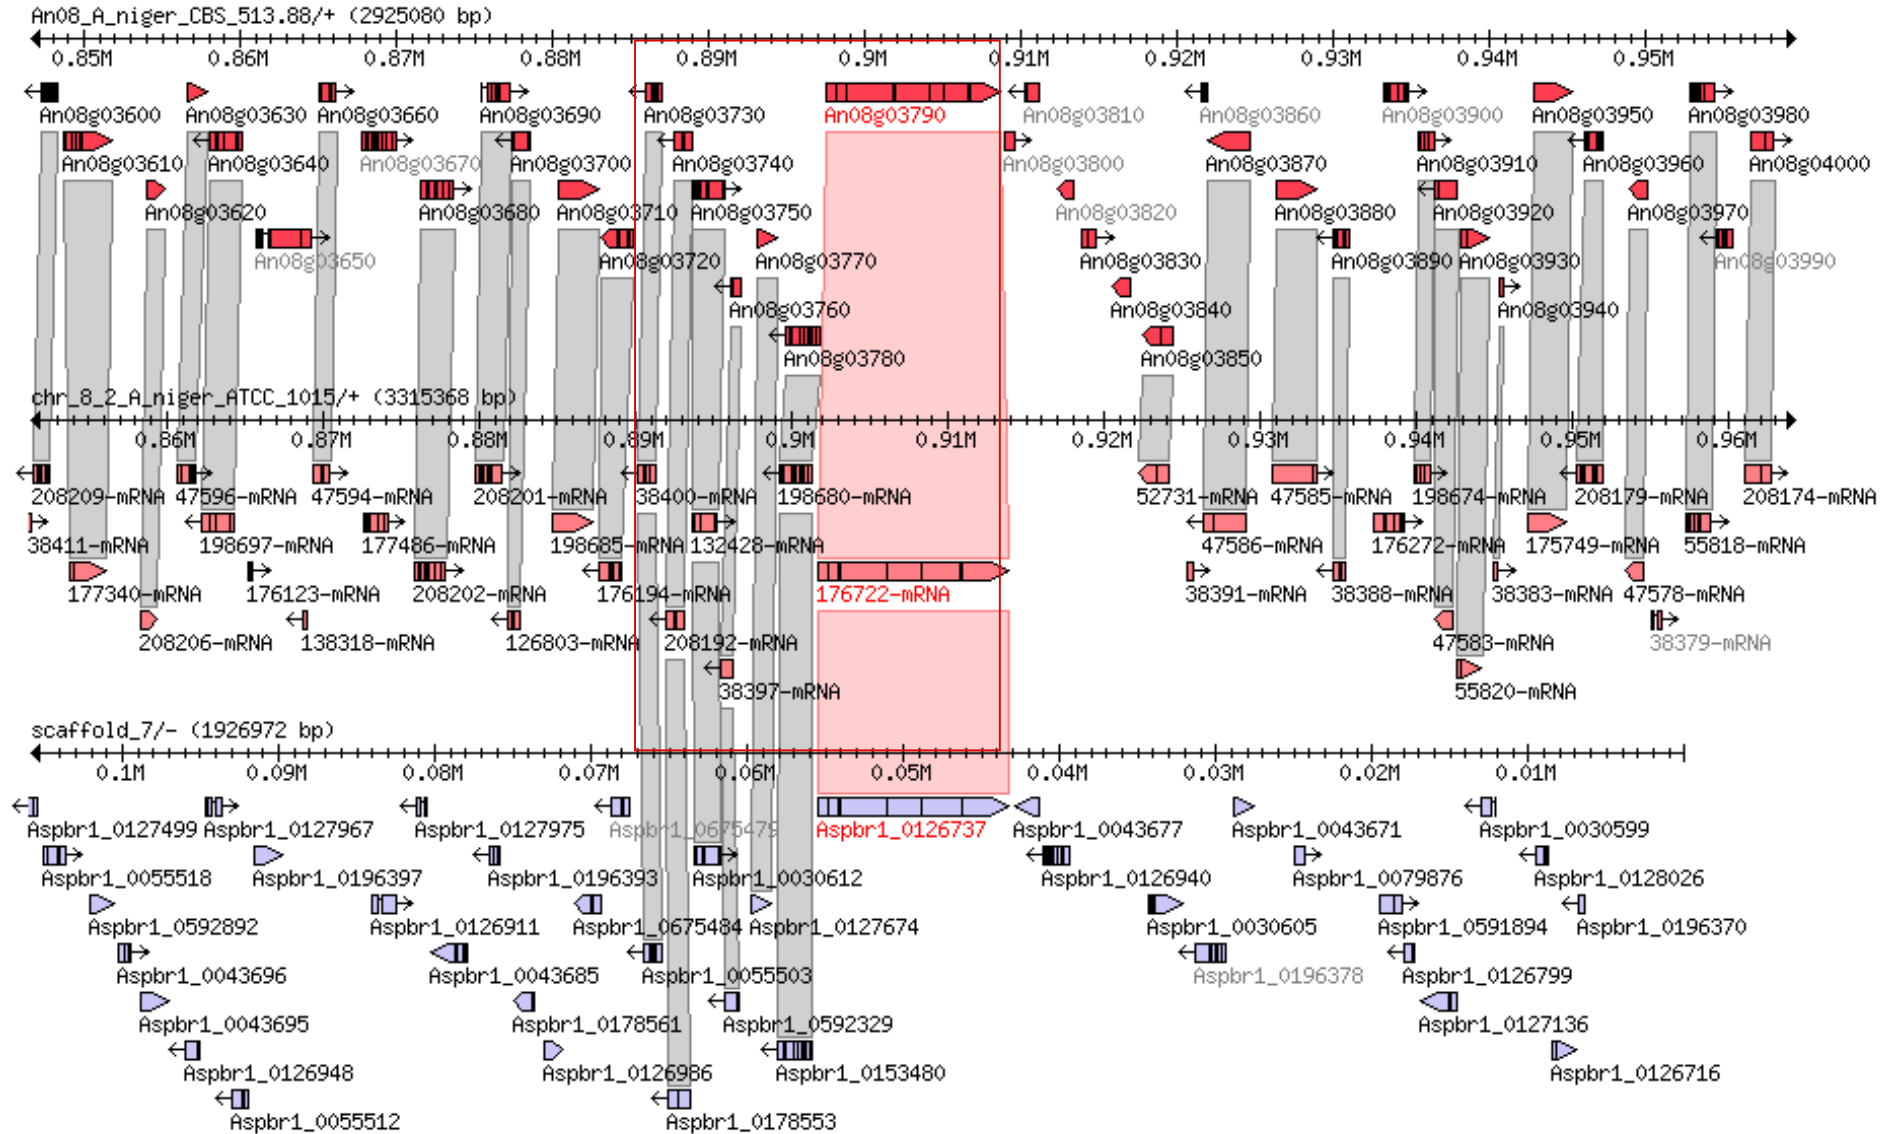

**An08g03790 cluster**

| Gene id (SMURF) | Gene positions | Gene distance | AspGD name | AspGD description line or supplemental annotation                                                                                                                                                                                                                      | protein ID (antiSMASH) | AspGD ID   |
|-----------------|----------------|---------------|------------|------------------------------------------------------------------------------------------------------------------------------------------------------------------------------------------------------------------------------------------------------------------------|------------------------|------------|
| An08g03610      | 18             | 2328          |            | Domain(s) with predicted hydrolase activity and integral to membrane localization<br>Ortholog of A. nidulans FGSC A4 : AN1147, A. fumigatus Af293 : Afu1g11500/erg27, A. niger ATCC 1015 : 208206-mRNA, A. versicolor : Aspve1_0049410 and A. sydowii : Aspsy1_0053214 | n/a                    | An08g03610 |
| An08g03620      | 17             | 1497          |            | Ortholog of A. nidulans FGSC A4 : AN10149, A. fumigatus Af293 : Afu1g11510, A. oryzae RIB40 : AO090038000273, A. niger ATCC 1015 : 47596-mRNA and Aspergillus carbonarius ITEM 5010 : Acar5010_202814                                                                  | n/a                    | An08g03620 |
| An08g03630      | 16             | 542           |            | Domain(s) with predicted role in transmembrane transport and integral to membrane localization                                                                                                                                                                         | n/a                    | An08g03630 |
| An08g03640      | 15             | 961           |            | Domain(s) with predicted DNA binding, zinc ion binding activity, role in transcription, DNA-dependent and nucleus localization                                                                                                                                         | n/a                    | An08g03640 |
| An08g03650      | 14             | 420           |            | Ortholog of A. fumigatus Af293 : Afu1g11540, A. oryzae RIB40 : AO090038000270, A. niger ATCC 1015 : 47594-mRNA, A. versicolor : Aspve1_0119273 and A. sydowii : Aspsy1_0025614                                                                                         | n/a                    | An08g03650 |
| An08g03660      | 13             | 1548          |            | Putative ethanalamine kinase                                                                                                                                                                                                                                           | n/a                    | An08g03660 |
| An08g03670      | 12             | 1759          |            | Ortholog of A. nidulans FGSC A4 : AN1124, A. fumigatus Af293 : Afu1g11720, A. oryzae RIB40 : AO090038000251, A. niger ATCC 1015 : 208202-mRNA and A. versicolor : Aspve1_0288823                                                                                       | n/a                    | An08g03670 |
| An08g03680      | 11             | 2133          |            | Putative ADP-ribosylation factor; expression enhanced by maltose                                                                                                                                                                                                       | n/a                    | An08g03680 |
| An08g03690      | 10             | 517           |            | Ortholog of A. nidulans FGSC A4 : AN1127, AN7386, A. fumigatus Af293 : Afu1g11740, A. niger CBS 513.88 : An02g03380, A. oryzae RIB40 : AO090026000507 and A. niger ATCC 1015 : 126803-mRNA                                                                             | prot_ID_934            | An08g03700 |
| An08g03700      | 9              | 1913          |            | Ortholog of A. nidulans FGSC A4 : AN1128, A. fumigatus Af293 : Afu1g11660, A. oryzae RIB40 : AO090038000255, A. niger ATCC 1015 : 198685-mRNA and A. versicolor : Aspve1_0121473                                                                                       | prot_ID_988            | An08g03710 |
| An08g03710      | 8              | 271           |            | Domain(s) with predicted DNA binding, zinc ion binding activity, role in transcription, DNA-dependent and nucleus localization                                                                                                                                         | prot_ID_594            | An08g03720 |
| An08g03720      | 7              | 794           |            |                                                                                                                                                                                                                                                                        |                        |            |

|                   |    |      |                                                                                                                                                                                                                                     |                    |                   |     |
|-------------------|----|------|-------------------------------------------------------------------------------------------------------------------------------------------------------------------------------------------------------------------------------------|--------------------|-------------------|-----|
| An08g03730        | 6  | 717  | Domain(s) with predicted oxidoreductase activity, acting on paired donors, with incorporation or reduction of molecular oxygen, 2-oxoglutarate as one donor, and incorporation of one atom each of oxygen into both donors activity | prot_ID_36         | An08g03730        | ECS |
| An08g03740        | 5  | 32   | Domain(s) with predicted nucleotide binding, oxidoreductase activity, zinc ion binding activity and role in oxidation-reduction process                                                                                             | prot_ID_605        | An08g03740        |     |
| An08g03750        | 4  | 344  | Domain(s) with predicted role in transmembrane transport and integral to membrane localization                                                                                                                                      | prot_ID_67         | An08g03750        |     |
| An08g03760        | 3  | 1083 | Protein of unknown function; expression repressed by tunicamycin and DTT                                                                                                                                                            | prot_ID_885        | An08g03760        |     |
| An08g03770        | 2  | 595  | Domain(s) with predicted sequence-specific DNA binding RNA polymerase II transcription factor activity, sequence-specific DNA binding transcription factor activity, zinc ion binding activity                                      | prot_ID_193        | An08g03770        |     |
| An08g03780        | 1  | 548  | Ortholog(s) have catalytic activity and role in sterigmatocystin biosynthetic process                                                                                                                                               | prot_ID_774        | An08g03780        |     |
| <b>An08g03790</b> | 0  | 0    | Ortholog(s) have role in pseurotin A biosynthetic process                                                                                                                                                                           | <b>prot_ID_426</b> | <b>An08g03790</b> | ECS |
| An08g03800        | -1 | 197  | Domain(s) with predicted nucleotide binding activity                                                                                                                                                                                | prot_ID_248        | An08g03800        |     |
| An08g03810        | -2 | 722  | Protein of unknown function                                                                                                                                                                                                         | prot_ID_518        | An08g03810        |     |
| An08g03820        | -3 | 1084 | Domain(s) with predicted nucleotide binding, oxidoreductase activity, zinc ion binding activity and role in oxidation-reduction process                                                                                             | prot_ID_389        | An08g03820        |     |
| An08g03830        | -4 | 525  | Domain(s) with predicted catalytic activity, coenzyme binding, nucleotide binding activity and role in cellular metabolic process                                                                                                   | prot_ID_1137       | An08g03830        |     |
| An08g03840        | -5 | 948  | Ortholog(s) have 3-dehydroshikimate dehydratase activity and role in quinate catabolic process                                                                                                                                      | prot_ID_1100       | An08g03840        |     |
| An08g03850        | -6 | 856  | Ortholog(s) have role in quinate catabolic process                                                                                                                                                                                  | prot_ID_170        | An08g03850        |     |
| An08g03860        | -7 | 1992 | Protein of unknown function                                                                                                                                                                                                         | prot_ID_539        | An08g03860        |     |
| An08g03870        | -8 | 21   | Ortholog(s) have sequence-specific DNA binding transcription factor activity and role in positive regulation of transcription from RNA polymerase II promoter, quinate catabolic process                                            | prot_ID_292        | An08g03870        |     |
| n/a               |    |      | Ortholog(s) have role in negative regulation of transcription from RNA polymerase II promoter, quinate catabolic process                                                                                                            | prot_ID_112        | An08g03880        |     |

# An08g04820 cluster

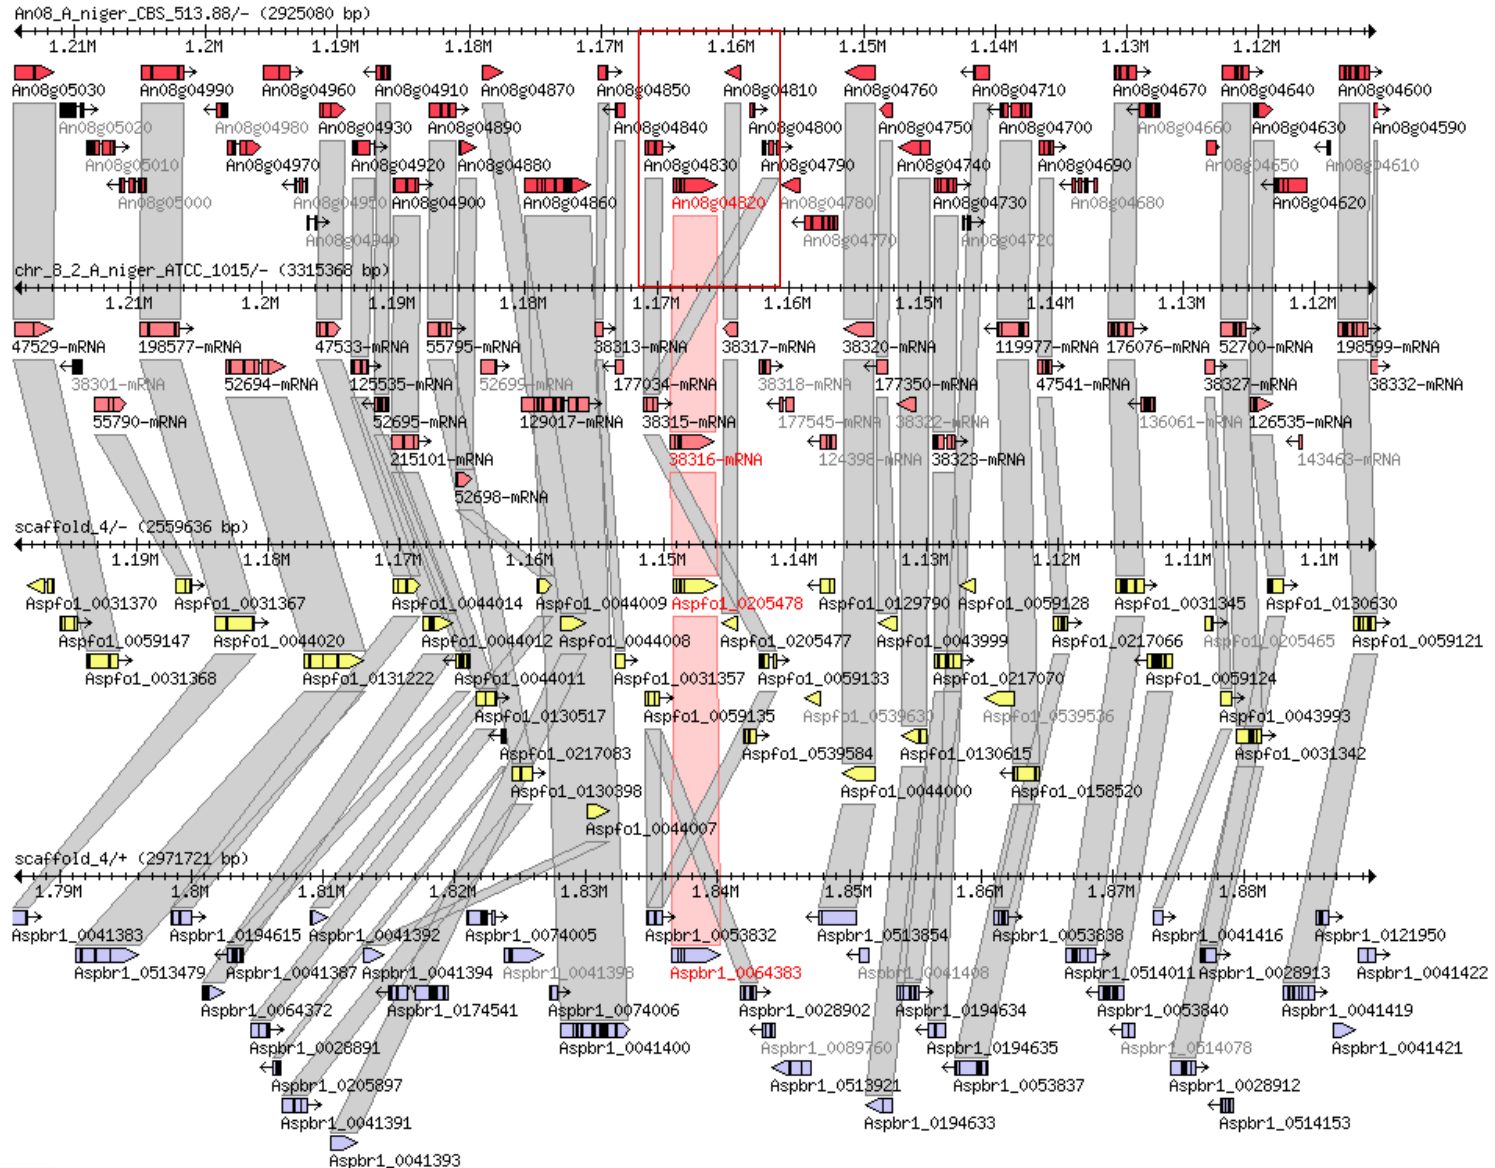

**An08g04820 cluster**

| Gene id (SMURF)   | Gene positions | Gene distance | AspGD name | AspGD description line or supplemental annotation                                                                                                                                              | protein ID (antiSMASH) | AspGD ID          |     |
|-------------------|----------------|---------------|------------|------------------------------------------------------------------------------------------------------------------------------------------------------------------------------------------------|------------------------|-------------------|-----|
| An08g04710        | 11             | 139           |            | Ortholog of <i>A. brasiliensis</i> : Aspbr1_0194635                                                                                                                                            | prot_ID_606            | An08g04710        |     |
| An08g04720        | 10             | 421           |            | Protein of unknown function                                                                                                                                                                    | prot_ID_730            | An08g04720        |     |
| An08g04730        | 9              | 377           |            | Domain(s) with predicted electron carrier activity, oxidoreductase activity and role in oxidation-reduction process                                                                            | prot_ID_1059           | An08g04730        |     |
| An08g04740        | 8              | 832           |            | Domain(s) with predicted sequence-specific DNA binding RNA polymerase II transcription factor activity, sequence-specific DNA binding transcription factor activity, zinc ion binding activity | prot_ID_1145           | An08g04740        |     |
| An08g04750        | 7              | 276           |            | Domain(s) with predicted proline racemase activity                                                                                                                                             | prot_ID_160            | An08g04750        |     |
| An08g04760        | 6              | 606           |            | Ortholog of <i>A. brasiliensis</i> : Aspbr1_0513854, <i>A. niger</i> ATCC 1015 : 38320-mRNA and <i>A. acidus</i> : Aspfo1_0044000                                                              | prot_ID_686            | An08g04760        |     |
| An08g04770        | 5              | 405           |            | Domain(s) with predicted catalytic activity and role in nucleoside metabolic process                                                                                                           | prot_ID_557            | An08g04770        |     |
| An08g04780        | 4              | 149           |            | Protein of unknown function                                                                                                                                                                    | prot_ID_384            | An08g04780        |     |
| An08g04790        | 3              | 560           |            | Ortholog of <i>A. nidulans</i> FGSC A4 : AN6413, AN8328, AN3395, AN3241, AN10369, AN1930, AN2386, AN1738, AN9266, AN10886, AN7232, AN7406, AN7774, AN12202                                     | prot_ID_1149           | An08g04790        | ECS |
| An08g04800        | 2              | 748           |            | Domain(s) with predicted carbon-sulfur lyase activity and role in metabolic process                                                                                                            | prot_ID_154            | An08g04800        |     |
| An08g04810        | 1              | 609           |            | Domain(s) with predicted catalytic activity and role in metabolic process                                                                                                                      | prot_ID_835            | An08g04810        |     |
| <b>An08g04820</b> | 0              | 0             |            | Protein similar to nonribosomal peptide synthases (NRPS-like)                                                                                                                                  | <b>prot_ID_1054</b>    | <b>An08g04820</b> |     |
| An08g04830        | -1             | 853           |            | Ortholog of <i>A. nidulans</i> FGSC A4 : AN6413, AN8328, AN3395, AN3241, AN10369, AN1930, AN2386, AN1738, AN9266, AN10886, AN7232, AN7406, AN7774, AN12202                                     | prot_ID_943            | An08g04830        | ECS |
| An08g04840        | -2             | 1546          |            | Ortholog of <i>A. niger</i> ATCC 1015 : 177034-mRNA                                                                                                                                            | prot_ID_697            | An08g04840        |     |
| An08g04850        | -3             | 537           |            | Ortholog of <i>A. acidus</i> : Aspfo1_0031357 and <i>A. niger</i> ATCC 1015 : 38313-mRNA                                                                                                       | prot_ID_360            | An08g04850        |     |
| An08g04860        | -4             | 556           |            | Domain(s) with predicted ATP binding, ATPase activity, coupled to transmembrane movement of substances activity, role in transmembrane transport and integral to membrane localization         | prot_ID_626            | An08g04860        |     |

|            |     |      |                                                                                                                                                                                                                           |             |            |
|------------|-----|------|---------------------------------------------------------------------------------------------------------------------------------------------------------------------------------------------------------------------------|-------------|------------|
| An08g04870 | -5  | 1590 | Ortholog of <i>A. oryzae</i> RIB40 : AO090103000142, <i>A. brasiliensis</i> : Aspbr1_0041393, Aspbr1_0660900, <i>Aspergillus flavus</i> NRRL 3357 : AFL2T_12232 and <i>A. acidus</i> : Aspfo1_0037486, Aspfo1_0044008     | prot_ID_217 | An08g04870 |
| An08g04880 | -6  | 999  | Ortholog of <i>A. nidulans</i> FGSC A4 : AN1066, <i>A. fumigatus</i> Af293 : Afu1g12250, <i>A. oryzae</i> RIB40 : AO090001000304, <i>A. niger</i> ATCC 1015 : 52698-mRNA and <i>A. versicolor</i> : Aspve1_0024252        | prot_ID_378 | An08g04880 |
| An08g04890 | -7  | 490  | Domain(s) with predicted DNA binding activity, role in transcription, DNA-dependent and nucleus localization                                                                                                              | prot_ID_910 | An08g04890 |
| An08g04900 | -8  | 1118 | Ortholog of <i>A. nidulans</i> FGSC A4 : AN1064/nup57, <i>A. fumigatus</i> Af293 : Afu1g12280, <i>A. oryzae</i> RIB40 : AO090001000301, <i>A. niger</i> ATCC 1015 : 215101-mRNA and <i>A. versicolor</i> : Aspve1_0049314 | prot_ID_469 | An08g04900 |
| An08g04910 | -9  | 632  | NADH-ubiquinone oxidoreductase; respiratory-chain NADH dehydrogenase                                                                                                                                                      | n/a         | An08g04910 |
| An08g04920 | -10 | 281  | Domain(s) with predicted fatty-acyl-CoA binding activity                                                                                                                                                                  | n/a         | An08g04920 |
| An08g04930 | -11 | 663  | Domain(s) with predicted amino acid transmembrane transporter activity, role in amino acid transmembrane transport and membrane localization                                                                              | n/a         | An08g04930 |
| An08g04940 | -12 | 274  | Protein of unknown function                                                                                                                                                                                               | n/a         | An08g04940 |

## An08g09220 cluster

No ATCC 1015 orthologous cluster, no manual prediction made

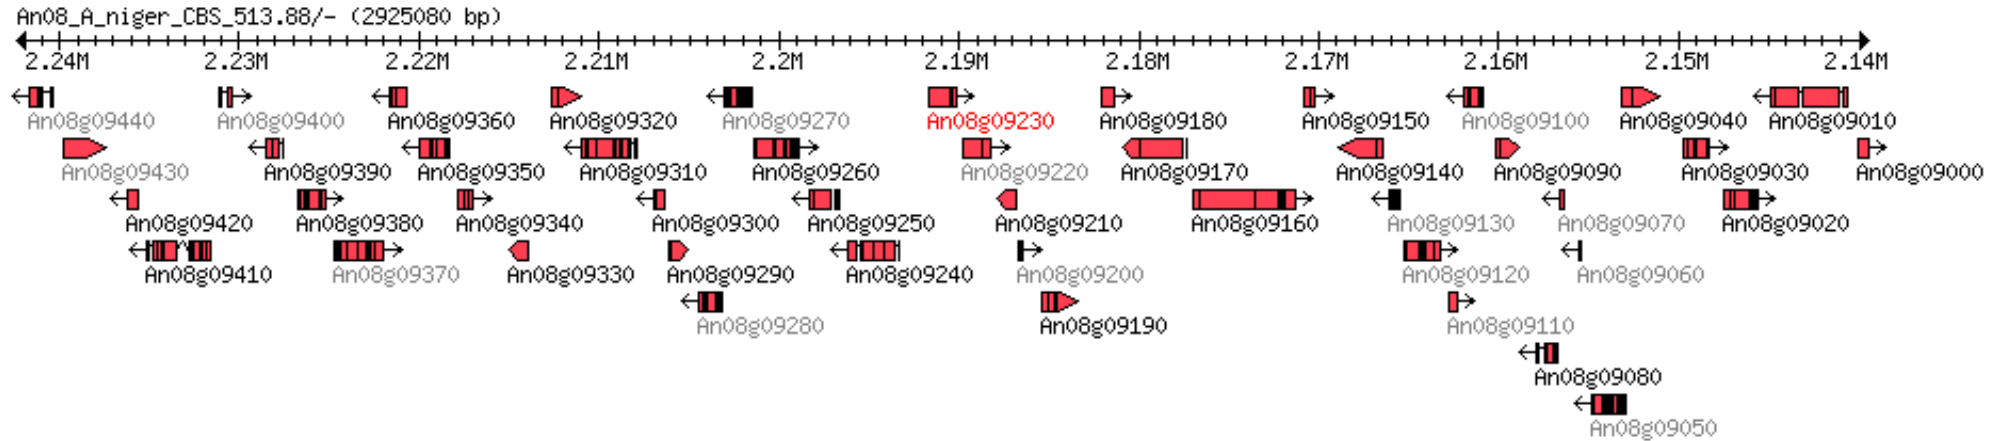

**An08g09220 cluster**

| Gene id (SMURF)   | Gene positions | Gene distance | AspGD name | AspGD description line or supplemental annotation                                                                                                                                                                      | protein ID (antiSMASH) | AspGD ID          |
|-------------------|----------------|---------------|------------|------------------------------------------------------------------------------------------------------------------------------------------------------------------------------------------------------------------------|------------------------|-------------------|
| n/a               |                |               |            | Protein of unknown function                                                                                                                                                                                            | prot_ID_775            | An08g09140        |
| An08g09150        | 7              | 590           |            | Ortholog of <i>A. acidus</i> : Aspfo1_0130243, <i>A. sydowii</i> : Aspsy1_0041308 and <i>A. niger</i> ATCC 1015 : 38009-mRNA                                                                                           | prot_ID_322            | An08g09150        |
| An08g09160        | 6              | 277           |            | Ortholog of <i>A. nidulans</i> FGSC A4 : AN5455, <i>A. fumigatus</i> Af293 : Afu6g13370, <i>A. oryzae</i> RIB40 : AO090003000462, <i>A. niger</i> ATCC 1015 : 47358-mRNA                                               | prot_ID_1022           | An08g09160        |
| An08g09170        | 5              | 457           |            | and <i>A. versicolor</i> : Aspve1_0132580<br>Ortholog of <i>A. nidulans</i> FGSC A4 : AN5456, <i>A. fumigatus</i> Af293 : Afu6g13360, <i>A. oryzae</i> RIB40 : AO090003000461, <i>A. niger</i> ATCC 1015 : 177749-mRNA | prot_ID_233            | An08g09170        |
| An08g09180        | 4              | 1252          |            | and <i>A. versicolor</i> : Aspve1_0169365<br>Ortholog of <i>A. oryzae</i> RIB40 : AO090023000473, <i>A. versicolor</i> : Aspve1_0045297, <i>A. sydowii</i> : Aspsy1_0046488 and <i>A. niger</i> ATCC 1015 : 38006-mRNA | prot_ID_845            | An08g09180        |
| An08g09190        | 3              | 995           |            | Ortholog(s) have monooxygenase activity and role in sterigmatocystin biosynthetic process                                                                                                                              | prot_ID_48             | An08g09190        |
| An08g09200        | 2              | 78            |            | Protein of unknown function                                                                                                                                                                                            | prot_ID_703            | An08g09200        |
| An08g09210        | 1              | 268           |            | Domain(s) with predicted isomerase activity, transferase activity and role in queuosine biosynthetic process                                                                                                           | prot_ID_402            | An08g09210        |
| <b>An08g09220</b> | 0              | 0             |            | Protein similar to nonribosomal peptide synthases (NRPS-like)                                                                                                                                                          | <b>prot_ID_12</b>      | <b>An08g09220</b> |
| An08g09230        | -1             | 301           |            | Ortholog(s) have catalytic activity and role in sterigmatocystin biosynthetic process                                                                                                                                  | prot_ID_541            | An08g09230        |
| An08g09240        | -2             | 1591          |            | Domain(s) with predicted DNA binding, sequence-specific DNA binding RNA polymerase II transcription factor activity, sequence-specific DNA binding transcription factor activity, zinc ion binding activity            | prot_ID_668            | An08g09240        |
| An08g09250        | -3             | 499           |            | Domain(s) with predicted role in transmembrane transport and integral to membrane localization                                                                                                                         | prot_ID_1122           | An08g09250        |
| An08g09260        | -4             | 496           |            | Domain(s) with predicted acetoacetate-CoA ligase activity and role in lipid metabolic process                                                                                                                          | prot_ID_1160           | An08g09260        |
| An08g09270        | -5             | 123           |            | Protein of unknown function                                                                                                                                                                                            | prot_ID_932            | An08g09270        |
| An08g09280        | -6             | 66            |            | Domain(s) with predicted catalytic activity and role in metabolic process                                                                                                                                              | prot_ID_1168           | An08g09280        |
| An08g09290        | -7             | 603           |            | Domain(s) with predicted hydrolase activity, acting on carbon-nitrogen (but not peptide) bonds activity and role in carbohydrate metabolic process                                                                     | prot_ID_420            | An08g09290        |
| An08g09300        | -8             | 225           |            | Lactoylglutathione lyase (glyoxylase I)                                                                                                                                                                                | prot_ID_492            | An08g09300        |



|            |     |      |                                                                                                                                                                                                             |              |            |
|------------|-----|------|-------------------------------------------------------------------------------------------------------------------------------------------------------------------------------------------------------------|--------------|------------|
| An08g09310 | -9  | 855  | Domain(s) with predicted DNA binding, zinc ion binding activity, role in transcription, DNA-dependent and nucleus localization                                                                              | prot_ID_459  | An08g09310 |
| An08g09320 | -10 | 67   | Domain(s) with predicted role in transmembrane transport and integral to membrane localization                                                                                                              | prot_ID_4    | An08g09320 |
| An08g09330 | -11 | 1268 | Ortholog(s) have role in ergot alkaloid biosynthetic process, secondary metabolic process                                                                                                                   | prot_ID_1010 | An08g09330 |
| An08g09340 | -12 | 1832 | Ortholog(s) have intracellular localization<br>Domain(s) with predicted substrate-specific transmembrane transporter activity, role in transmembrane transport and integral to membrane localization        | prot_ID_873  | An08g09340 |
| An08g09350 | -13 | 520  | Domain(s) with predicted nucleotide binding, oxidoreductase activity and role in oxidation-reduction process                                                                                                | prot_ID_778  | An08g09350 |
| An08g09360 | -14 | 678  | Domain(s) with predicted DNA binding, sequence-specific DNA binding RNA polymerase II transcription factor activity, sequence-specific DNA binding transcription factor activity, zinc ion binding activity | prot_ID_19   | An08g09360 |
| An08g09370 | -15 | 219  | D-xylulose reductase (xylitol dehydrogenase); sorbitol (glucitol) dehydrogenase (NAD <sup>+</sup> )                                                                                                         | n/a          | An08g09370 |
| An08g09380 | -16 | 453  | Domain(s) with predicted ATP binding, kinase activity and role in metabolic process                                                                                                                         | n/a          | An08g09380 |
| An08g09390 | -17 | 840  | Protein of unknown function                                                                                                                                                                                 | n/a          | An08g09390 |
| An08g09400 | -18 | 1766 |                                                                                                                                                                                                             | n/a          | An08g09400 |

# An08g10930 cluster

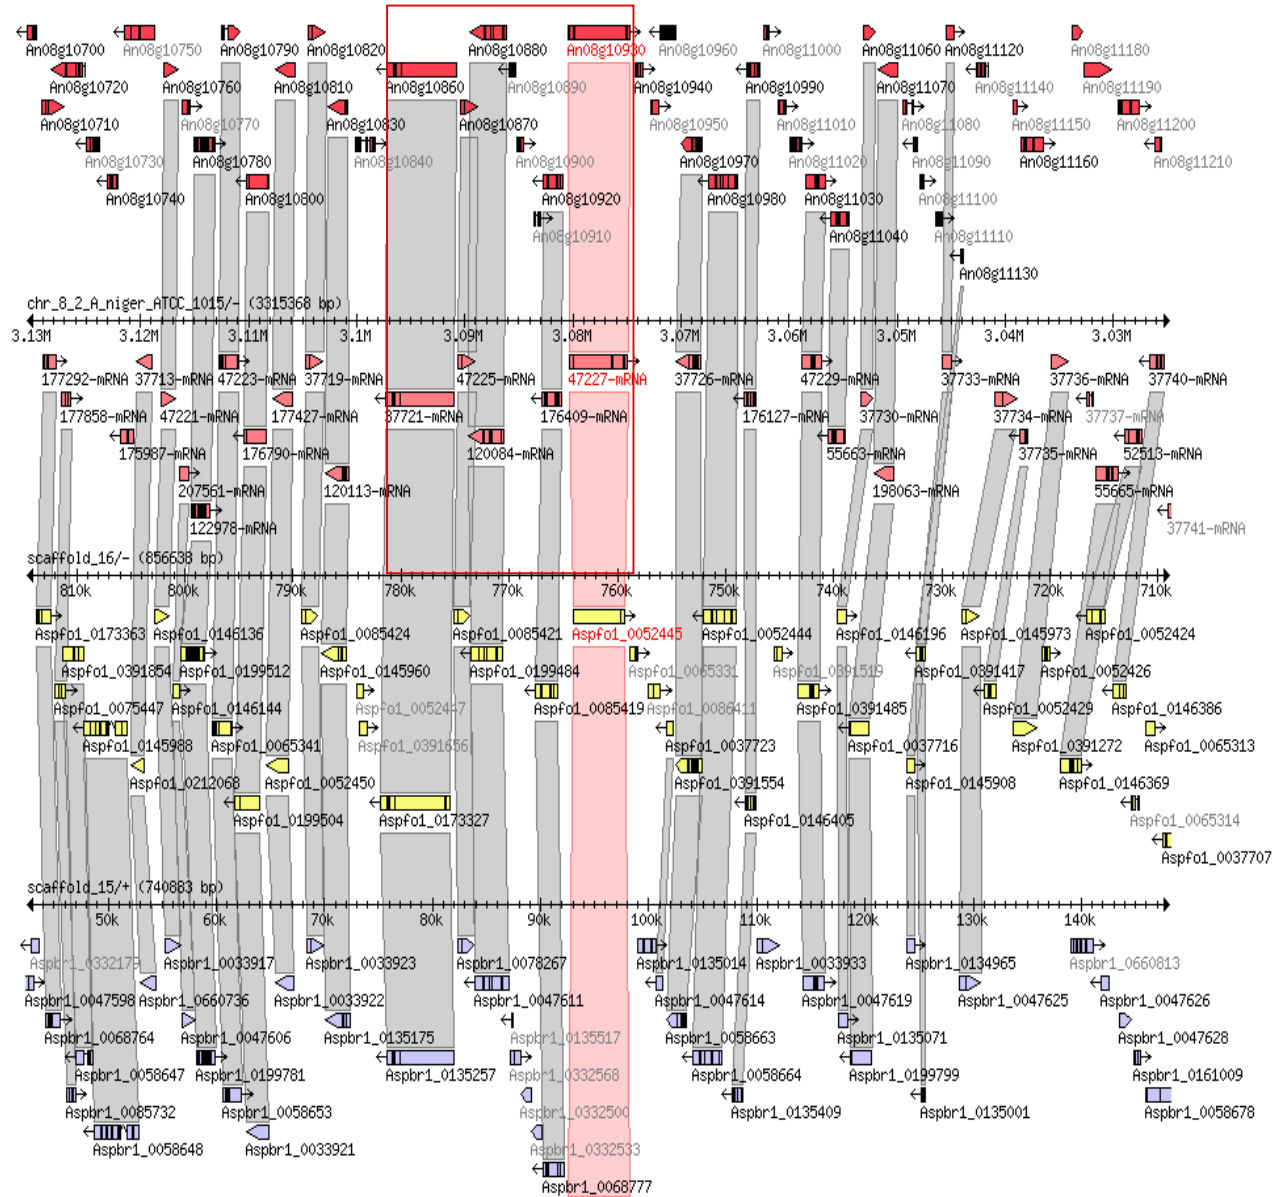

**An08g10930 cluster**

| Gene id (SMURF)   | Gene positions | Gene distance | AspGD name | AspGD description line or supplemental annotation                                                                                                                                                                                                                                                                                                                               | protein ID (antiSMASH) | AspGD ID          |     |
|-------------------|----------------|---------------|------------|---------------------------------------------------------------------------------------------------------------------------------------------------------------------------------------------------------------------------------------------------------------------------------------------------------------------------------------------------------------------------------|------------------------|-------------------|-----|
| n/a               |                |               |            | Putative fatty acid synthase, beta subunit                                                                                                                                                                                                                                                                                                                                      | n/a                    | An08g10860        | ECS |
| n/a               |                |               |            | Has domain(s) with predicted 2 iron, 2 sulfur cluster binding, 2-methylcitrate dehydratase activity and role in propionate catabolic process, 2-methylcitrate cycle Domain(s) with predicted DNA binding, sequence-specific DNA binding RNA polymerase II transcription factor activity, sequence-specific DNA binding transcription factor activity, zinc ion binding activity | n/a                    | An08g10870        |     |
| An08g10880        | 5              | 367           |            | Protein of unknown function                                                                                                                                                                                                                                                                                                                                                     | n/a                    | An08g10880        |     |
| An08g10890        | 4              | 58            |            | Protein of unknown function                                                                                                                                                                                                                                                                                                                                                     | n/a                    | An08g10890        |     |
| An08g10900        | 3              | 817           |            | Protein of unknown function                                                                                                                                                                                                                                                                                                                                                     | n/a                    | An08g10900        |     |
| An08g10910        | 2              | 116           |            | Protein of unknown function                                                                                                                                                                                                                                                                                                                                                     | n/a                    | An08g10910        |     |
| An08g10920        | 1              | 445           |            | Putative citrate synthase                                                                                                                                                                                                                                                                                                                                                       | n/a                    | An08g10920        |     |
| <b>An08g10930</b> | 0              | 0             |            | <b>Fatty-acid synthase</b><br>Ortholog of A. nidulans FGSC A4 : AN3344/ngn27, A. fumigatus Af293 : Afu5g00720, A. niger CBS 513.88 : An07g02400, An18g00950, A. oryzae RIB40 : AO090038000013 and A. niger ATCC 1015 : 54083-mRNA                                                                                                                                               | n/a                    | <b>An08g10930</b> | ECS |
| An08g10940        | -1             | 580           |            | Domain(s) with predicted role in transmembrane transport and integral to membrane localization                                                                                                                                                                                                                                                                                  | n/a                    | An08g10940        |     |
| An08g10950        | -2             | 605           |            | Domain(s) with predicted DNA binding, sequence-specific DNA binding RNA polymerase II transcription factor activity, sequence-specific DNA binding transcription factor activity, zinc ion binding activity                                                                                                                                                                     | n/a                    | An08g10950        |     |
| An08g10960        | -3             | 85            |            | Protein with similarity to dienelactone hydrolase                                                                                                                                                                                                                                                                                                                               | n/a                    | An08g10960        |     |
| An08g10970        | -4             | 546           |            | Domain(s) with predicted sequence-specific DNA binding RNA polymerase II transcription factor activity, sequence-specific DNA binding transcription factor activity, zinc ion binding activity                                                                                                                                                                                  | n/a                    | An08g10970        |     |
| An08g10980        | -5             | 715           |            | Protein with similarity to dienelactone hydrolase                                                                                                                                                                                                                                                                                                                               | n/a                    | An08g10980        |     |
| An08g10990        | -6             | 841           |            | Domain(s) with predicted sequence-specific DNA binding RNA polymerase II transcription factor activity, sequence-specific DNA binding transcription factor activity, zinc ion binding activity                                                                                                                                                                                  | n/a                    | An08g10990        |     |
| An08g11000        | -7             | 445           |            | Domain(s) with predicted sequence-specific DNA binding RNA polymerase II transcription factor activity, sequence-specific DNA binding transcription factor activity, zinc ion binding activity                                                                                                                                                                                  | n/a                    | An08g11000        |     |

## An09g00450 cluster

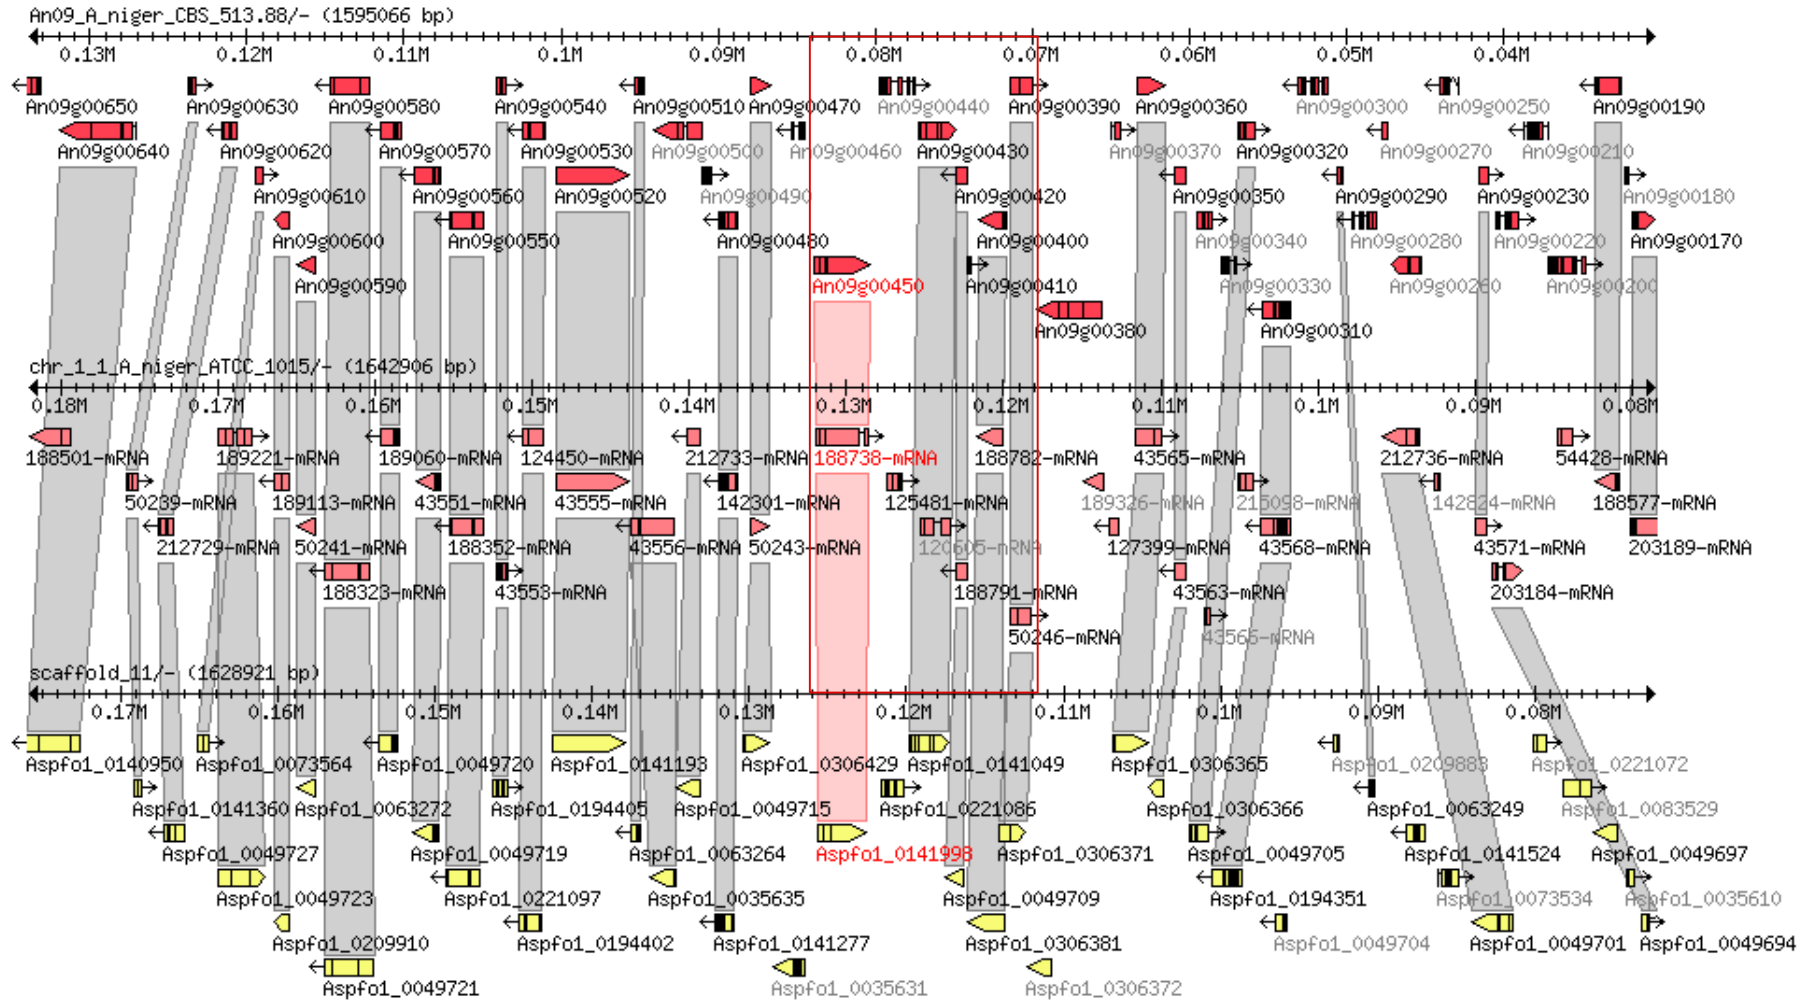

**An09g00450 cluster**

| Gene id (SMURF)   | Gene positions | Gene distance | AspGD name | AspGD description line or supplemental annotation                                                                                                                                                                                  | protein ID (antiSMASH) | AspGD ID          |     |
|-------------------|----------------|---------------|------------|------------------------------------------------------------------------------------------------------------------------------------------------------------------------------------------------------------------------------------|------------------------|-------------------|-----|
| n/a               |                |               |            | Ortholog of <i>A. brasiliensis</i> : Aspbr1_0049056, <i>A. acidus</i> : Aspfo1_0306366, <i>A. niger</i> ATCC 1015 : 43563-mRNA and <i>Aspergillus carbonarius</i> ITEM 5010 : Acar5010_131599, Acar5010_131666                     | prot_ID_309            | An09g00350        |     |
| n/a               |                |               |            | Ortholog of <i>A. nidulans</i> FGSC A4 : AN7985, <i>A. fumigatus</i> Af293 : Afu6g03240, <i>A. oryzae</i> RIB40 : AO090103000145, <i>A. niger</i> ATCC 1015 : 43565-mRNA and <i>A. versicolor</i> : Aspve1_0032365, Aspve1_0072790 | prot_ID_414            | An09g00360        |     |
| n/a               |                |               |            | Protein of unknown function                                                                                                                                                                                                        | prot_ID_330            | An09g00370        |     |
| n/a               |                |               |            | Domain(s) with predicted ATP binding, protein serine/threonine kinase activity and role in protein phosphorylation                                                                                                                 | prot_ID_203            | An09g00380        |     |
| n/a               |                |               |            | Domain(s) with predicted oxidoreductase activity and role in oxidation-reduction process                                                                                                                                           | prot_ID_146            | An09g00390        | ECS |
| An09g00400        | 5              | 277           |            | Domain(s) with predicted amino acid transmembrane transporter activity, role in amino acid transmembrane transport and membrane localization                                                                                       | prot_ID_363            | An09g00400        |     |
| An09g00410        | 4              | 21            |            | Ortholog of <i>A. brasiliensis</i> : Aspbr1_0138124                                                                                                                                                                                | prot_ID_290            | An09g00410        |     |
| An09g00420        | 3              | 67            |            | Domain(s) with predicted catalytic activity and role in metabolic process                                                                                                                                                          | prot_ID_294            | An09g00420        |     |
| An09g00430        | 2              | 144           |            | Domain(s) with predicted DNA binding, sequence-specific DNA binding RNA polymerase II transcription factor activity, sequence-specific DNA binding transcription factor activity, zinc ion binding activity                        | prot_ID_390            | An09g00430        |     |
| An09g00440        | 1              | 600           |            | Protein of unknown function                                                                                                                                                                                                        | prot_ID_213            | An09g00440        |     |
| <b>An09g00450</b> | 0              | 0             |            | Protein similar to nonribosomal peptide synthases (NRPS-like)                                                                                                                                                                      | <b>prot_ID_394</b>     | <b>An09g00450</b> | ECS |
| An09g00460        | -1             | 630           |            | Protein of unknown function                                                                                                                                                                                                        | prot_ID_429            | An09g00460        |     |
| An09g00470        | -2             | 1313          |            | Ortholog of <i>A. brasiliensis</i> : Aspbr1_0201039, <i>A. acidus</i> : Aspfo1_0306429, <i>A. versicolor</i> : Aspve1_0363489 and <i>A. niger</i> ATCC 1015 : 50243-mRNA                                                           | prot_ID_76             | An09g00470        |     |
| An09g00480        | -3             | 855           |            | Domain(s) with predicted nucleotide binding activity                                                                                                                                                                               | prot_ID_10             | An09g00480        |     |
| An09g00490        | -4             | 372           |            | Protein of unknown function                                                                                                                                                                                                        | prot_ID_153            | An09g00490        |     |
| An09g00500        | -5             | 106           |            | Domain(s) with predicted sequence-specific DNA binding RNA polymerase II transcription factor activity, sequence-specific DNA binding transcription factor activity, zinc ion binding activity                                     | prot_ID_222            | An09g00500        |     |

|            |     |      |                                                                                                                                                                                                             |             |            |
|------------|-----|------|-------------------------------------------------------------------------------------------------------------------------------------------------------------------------------------------------------------|-------------|------------|
| An09g00510 | -6  | 542  | Ortholog of A. nidulans FGSC A4 : AN5396, A. niger CBS 513.88 : An01g01630, A. brasiliensis : Aspbr1_0040534, Aspbr1_0188798 and A. niger ATCC 1015 : 52059-mRNA                                            | prot_ID_655 | An09g00510 |
|            |     |      | Domain(s) with predicted ACP phosphopantetheine attachment site binding involved in fatty acid biosynthetic process, catalytic activity, phosphopantetheine binding activity                                |             |            |
| An09g00520 | -7  | 347  |                                                                                                                                                                                                             | prot_ID_372 | An09g00520 |
| An09g00530 | -8  | 721  | Domain(s) with predicted monooxygenase activity and role in oxidation-reduction process                                                                                                                     | prot_ID_631 | An09g00530 |
|            |     |      | Ortholog of A. brasiliensis : Aspbr1_0201030, A. niger ATCC 1015 : 43553-mRNA and A. acidus : Aspfo1_0194405                                                                                                |             |            |
| An09g00540 | -9  | 866  |                                                                                                                                                                                                             | prot_ID_127 | An09g00540 |
| An09g00550 | -10 | 820  | Domain(s) with predicted role in transmembrane transport and integral to membrane localization                                                                                                              | prot_ID_496 | An09g00550 |
| An09g00560 | -11 | 559  | Ortholog(s) have role in gliotoxin biosynthetic process                                                                                                                                                     | prot_ID_61  | An09g00560 |
|            |     |      | Domain(s) with predicted catalytic activity, coenzyme binding, nucleotide binding activity and role in cellular metabolic process                                                                           |             |            |
| An09g00570 | -12 | 1003 |                                                                                                                                                                                                             | prot_ID_543 | An09g00570 |
|            |     |      | Domain(s) with predicted DNA binding, sequence-specific DNA binding RNA polymerase II transcription factor activity, sequence-specific DNA binding transcription factor activity, zinc ion binding activity |             |            |
| An09g00580 | -13 | 994  |                                                                                                                                                                                                             | prot_ID_570 | An09g00580 |
| An09g00590 | -14 | 935  | Putative salicylate hydroxylase                                                                                                                                                                             | prot_ID_295 | An09g00590 |
| An09g00600 | -15 | 483  | Domain(s) with predicted nucleotide binding activity                                                                                                                                                        | prot_ID_47  | An09g00600 |
|            |     |      | Ortholog of A. niger CBS 513.88 : An08g08120, An03g00900, A. oryzae RIB40 : AO090010000695, A. brasiliensis : Aspbr1_0194369, Aspbr1_0196393 and A. niger ATCC 1015 : 45778-mRNA                            |             |            |
| An09g00610 | -16 | 720  |                                                                                                                                                                                                             | prot_ID_637 | An09g00610 |

# An09g00520 cluster

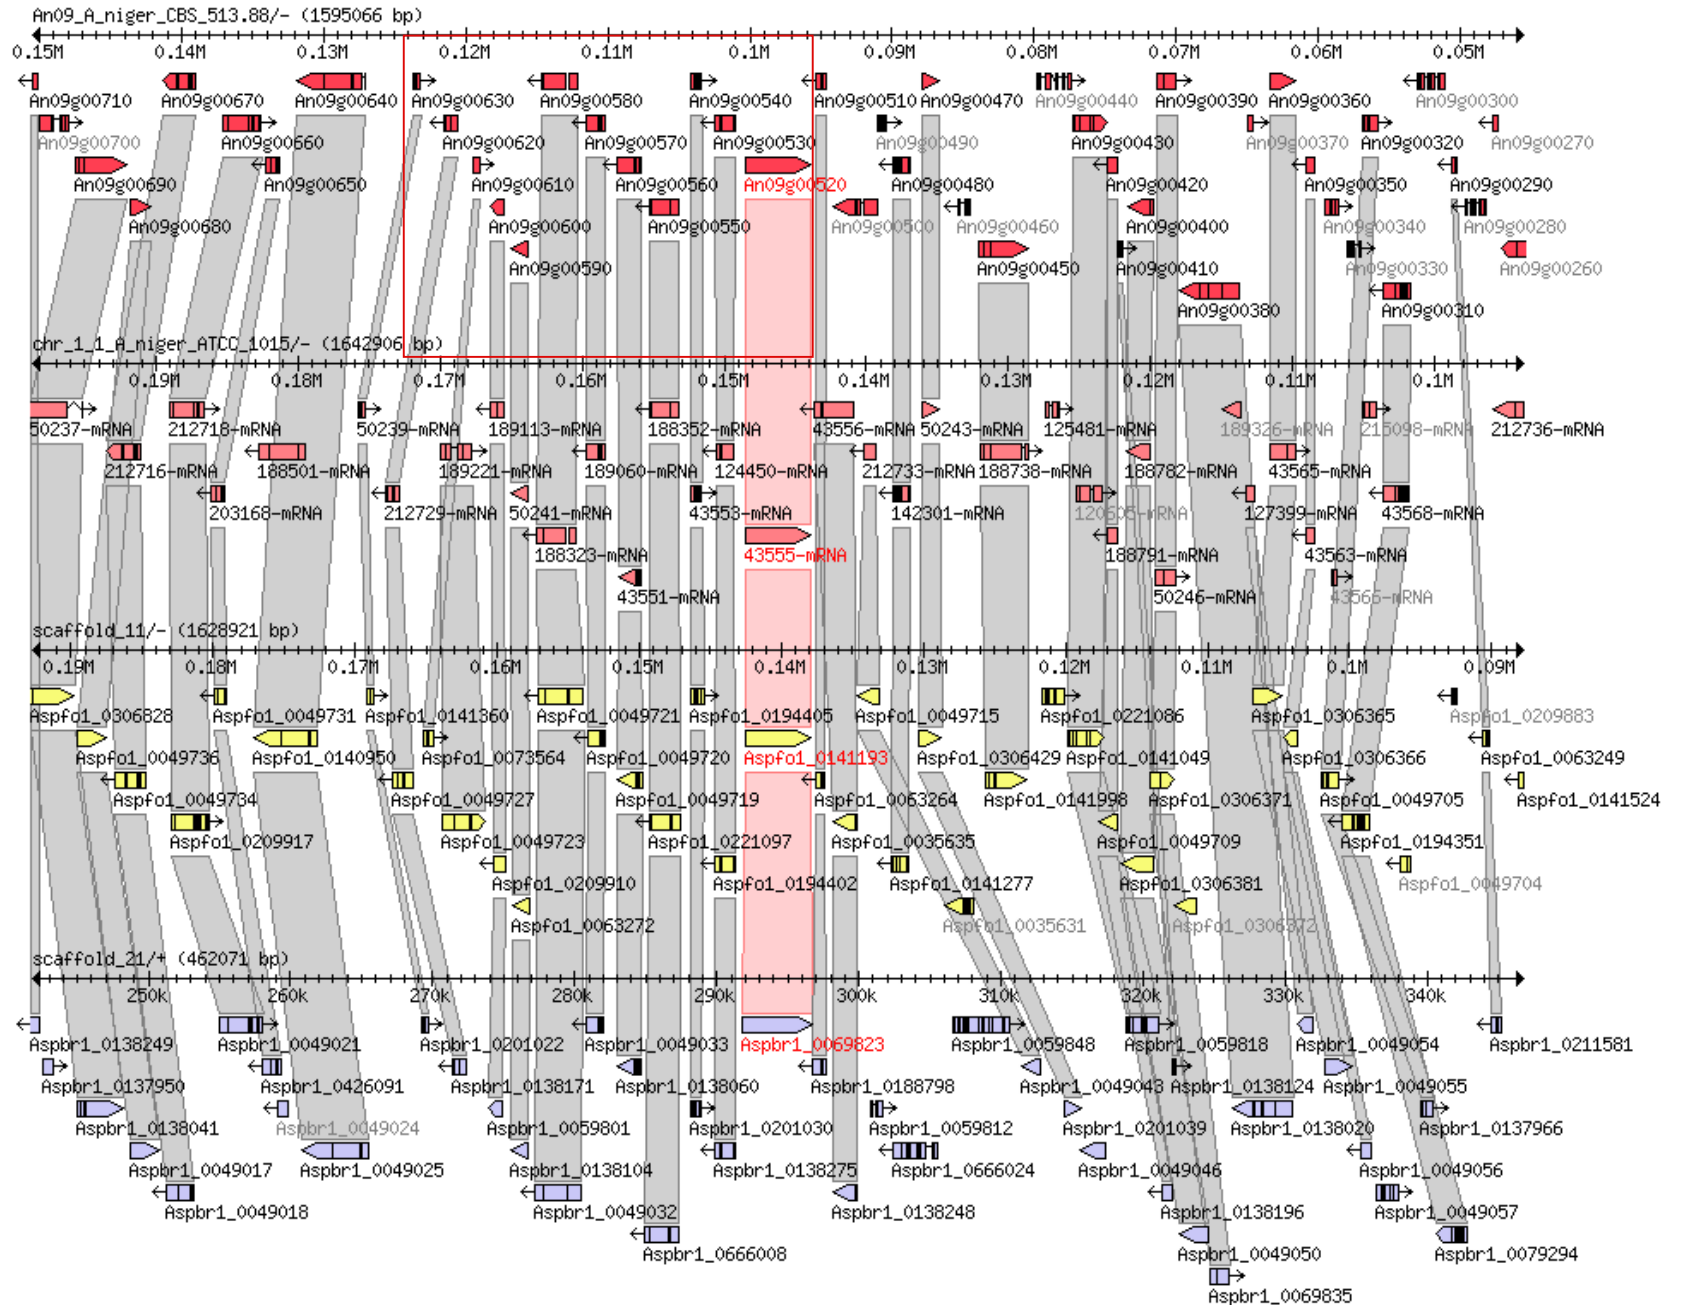

**An09g00520 cluster**

| Gene id (SMURF)   | Gene positions | Gene distance | AspGD name | AspGD description line or supplemental annotation                                                                                                                                                           | protein ID (antiSMASH) | AspGD ID              |
|-------------------|----------------|---------------|------------|-------------------------------------------------------------------------------------------------------------------------------------------------------------------------------------------------------------|------------------------|-----------------------|
| An09g00390        | 13             | 236           |            | Domain(s) with predicted oxidoreductase activity and role in oxidation-reduction process                                                                                                                    | n/a                    | An09g00390            |
| An09g00400        | 12             | 277           |            | Domain(s) with predicted amino acid transmembrane transporter activity, role in amino acid transmembrane transport and membrane localization                                                                | n/a                    | An09g00400            |
| An09g00410        | 11             | 21            |            | Ortholog of <i>A. brasiliensis</i> : Aspbr1_0138124                                                                                                                                                         | n/a                    | An09g00410            |
| An09g00420        | 10             | 67            |            | Domain(s) with predicted catalytic activity and role in metabolic process                                                                                                                                   | n/a                    | An09g00420            |
| An09g00430        | 9              | 144           |            | Domain(s) with predicted DNA binding, sequence-specific DNA binding RNA polymerase II transcription factor activity, sequence-specific DNA binding transcription factor activity, zinc ion binding activity | n/a                    | An09g00430            |
| An09g00440        | 8              | 600           |            |                                                                                                                                                                                                             | n/a                    | An09g00440            |
| An09g00450        | 7              | 630           |            | Domain(s) with predicted ACP phosphopantetheine attachment site binding involved in fatty acid biosynthetic process, catalytic activity, nucleotide binding activity                                        | n/a                    | An09g00450            |
| An09g00460        | 6              | 1313          |            |                                                                                                                                                                                                             | n/a                    | An09g00460            |
| An09g00470        | 5              | 855           |            | Ortholog of <i>A. brasiliensis</i> : Aspbr1_0201039, <i>A. acidus</i> : Aspfo1_0306429, <i>A. versicolor</i> : Aspve1_0363489 and <i>A. niger</i> ATCC 1015 : 50243-mRNA                                    | n/a                    | An09g00470            |
| An09g00480        | 4              | 372           |            | Domain(s) with predicted nucleotide binding activity                                                                                                                                                        | n/a                    | An09g00480            |
| An09g00490        | 3              | 106           |            |                                                                                                                                                                                                             | n/a                    | An09g00490            |
| An09g00500        | 2              | 542           |            | Domain(s) with predicted sequence-specific DNA binding RNA polymerase II transcription factor activity, sequence-specific DNA binding transcription factor activity, zinc ion binding activity              | n/a                    | An09g00500            |
| An09g00510        | 1              | 347           |            | Ortholog of <i>A. nidulans</i> FGSC A4 : AN5396, <i>A. niger</i> CBS 513.88 : An01g01630, <i>A. brasiliensis</i> : Aspbr1_0040534, Aspbr1_0188798 and <i>A. niger</i> ATCC 1015 : 52059-mRNA                | n/a                    | An09g00510            |
| <b>An09g00520</b> | 0              | 0             |            | <b>Putative nonribosomal peptide synthase (NRPS)</b>                                                                                                                                                        | n/a                    | <b>An09g00520</b> ECS |
| An09g00530        | -1             | 721           |            | Domain(s) with predicted monooxygenase activity and role in oxidation-reduction process                                                                                                                     | n/a                    | An09g00530            |
| An09g00540        | -2             | 866           |            | Ortholog of <i>A. brasiliensis</i> : Aspbr1_0201030, <i>A. niger</i> ATCC 1015 : 43553-mRNA and <i>A. acidus</i> : Aspfo1_0194405                                                                           | n/a                    | An09g00540            |
| An09g00550        | -3             | 820           |            | Domain(s) with predicted role in transmembrane transport and integral to membrane localization                                                                                                              | n/a                    | An09g00550            |



|            |     |      |      |                                                                                                                                                                                                              |     |            |     |
|------------|-----|------|------|--------------------------------------------------------------------------------------------------------------------------------------------------------------------------------------------------------------|-----|------------|-----|
| An09g00560 | -4  | 559  |      | Ortholog(s) have role in gliotoxin biosynthetic process<br>Domain(s) with predicted catalytic activity, coenzyme binding, nucleotide binding activity and role in cellular metabolic process                 | n/a | An09g00560 |     |
| An09g00570 | -5  | 1003 |      | Domain(s) with predicted DNA binding, sequence-specific DNA binding RNA polymerase II transcription factor activity, sequence-specific DNA binding transcription factor activity, zinc ion binding activity  | n/a | An09g00570 |     |
| An09g00580 | -6  | 994  |      | Putative salicylate hydroxylase                                                                                                                                                                              | n/a | An09g00580 |     |
| An09g00590 | -7  | 935  |      | Domain(s) with predicted nucleotide binding activity                                                                                                                                                         | n/a | An09g00590 |     |
| An09g00600 | -8  | 483  |      | Ortholog of <i>A. niger</i> CBS 513.88 : An08g08120, An03g00900, <i>A. oryzae</i> RIB40 : AO090010000695, <i>A. brasiliensis</i> : Aspbr1_0194369, Aspbr1_0196393 and <i>A. niger</i> ATCC 1015 : 45778-mRNA | n/a | An09g00600 |     |
| An09g00610 | -9  | 720  |      | Domain(s) with predicted nucleotide binding, oxidoreductase activity and role in oxidation-reduction process                                                                                                 | n/a | An09g00610 |     |
| An09g00620 | -10 | 1092 |      | Protein of unknown function                                                                                                                                                                                  | n/a | An09g00620 | ECS |
| n/a        |     |      | cipC |                                                                                                                                                                                                              | n/a | An09g00630 |     |

## An09g01290 cluster

No ATCC 1015 ortholog

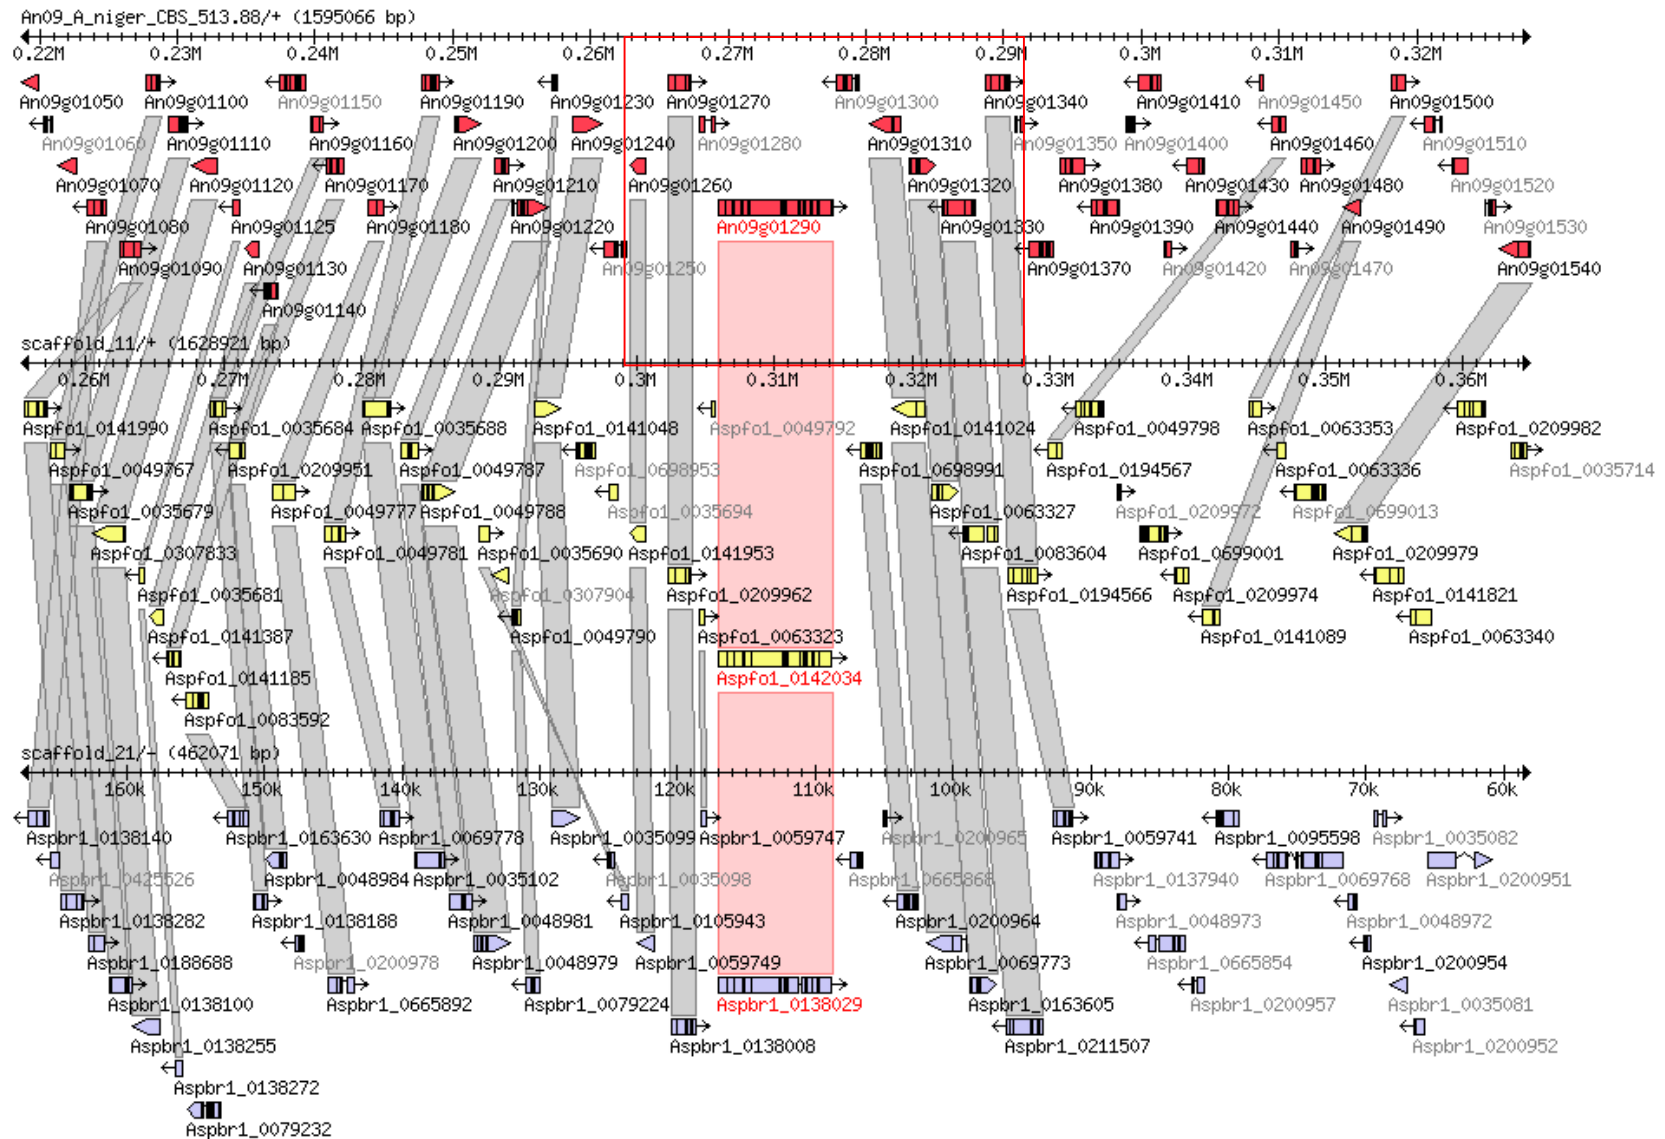

**An09g01290 cluster**

| Gene id (SMURF) | Gene positions | Gene distance | AspGD name | AspGD description line or supplemental annotation                                                                                                                                                                                   | protein ID (antiSMASH) | AspGD ID   |
|-----------------|----------------|---------------|------------|-------------------------------------------------------------------------------------------------------------------------------------------------------------------------------------------------------------------------------------|------------------------|------------|
| An09g01140      | 15             | 114           |            | Domain(s) with predicted hydrolase activity                                                                                                                                                                                         | n/a                    | An09g01140 |
| An09g01150      | 14             | 632           |            | Domain(s) with predicted nucleotide binding, oxidoreductase activity and role in oxidation-reduction process                                                                                                                        | n/a                    | An09g01150 |
| An09g01160      | 13             | 179           |            | Ortholog of <i>A. nidulans</i> FGSC A4 : AN5207, <i>A. fumigatus</i> Af293 : Afu6g07400, <i>A. oryzae</i> RIB40 : AO090005001560, <i>A. niger</i> ATCC 1015 : 125791-mRNA and <i>A. versicolor</i> : Aspve1_0045658                 | n/a                    | An09g01160 |
| An09g01170      | 12             | 1825          |            | Domain(s) with predicted oxidoreductase activity, acting on paired donors, with incorporation or reduction of molecular oxygen, 2-oxoglutarate as one donor, and incorporation of one atom each of oxygen into both donors activity | n/a                    | An09g01170 |
| An09g01180      | 11             | 2729          |            | Ortholog of <i>A. versicolor</i> : Aspve1_0032369, <i>A. sydowii</i> : Aspsy1_0156280, <i>Aspergillus terreus</i> NIH2624 : ATET_04345 and <i>A. niger</i> ATCC 1015 : 43506-mRNA                                                   | n/a                    | An09g01180 |
| An09g01190      | 10             | 1264          | abnA       | Endo-1,5-alpha-L-arabinase, secreted enzyme involved in degradation of hemicellulosic component L-araban                                                                                                                            | n/a                    | An09g01190 |
| An09g01200      | 9              | 1054          |            | Domain(s) with predicted sequence-specific DNA binding RNA polymerase II transcription factor activity, sequence-specific DNA binding transcription factor activity, zinc ion binding activity                                      | prot_ID_379            | An09g01200 |
| An09g01210      | 8              | 209           |            | Domain(s) with predicted nucleotide binding, oxidoreductase activity and role in oxidation-reduction process                                                                                                                        | prot_ID_611            | An09g01210 |
| An09g01220      | 7              | 94            |            | Ortholog of <i>A. nidulans</i> FGSC A4 : AN2326, <i>A. fumigatus</i> Af293 : Afu3g14650, <i>A. niger</i> ATCC 1015 : 188883-mRNA, <i>A. versicolor</i> : Aspve1_0050509 and <i>A. sydowii</i> : Aspsy1_0084810                      | prot_ID_308            | An09g01220 |
| An09g01230      | 6              | 1116          |            | Ortholog of <i>A. nidulans</i> FGSC A4 : AN2535, <i>A. fumigatus</i> Af293 : Afu3g14660, <i>A. versicolor</i> : Aspve1_0081353 and <i>A. sydowii</i> : Aspsy1_0087029                                                               | prot_ID_135            | An09g01230 |
| An09g01240      | 5              | 372           |            | Domain(s) with predicted phospholipase activity and role in phospholipid catabolic process                                                                                                                                          | prot_ID_614            | An09g01240 |
| An09g01250      | 4              | 266           |            | Protein of unknown function                                                                                                                                                                                                         | prot_ID_679            | An09g01250 |
| An09g01260      | 3              | 1633          |            | Domain(s) with predicted nucleotide binding activity                                                                                                                                                                                | prot_ID_72             | An09g01260 |
| An09g01270      | 2              | 504           |            | Domain(s) with predicted electron carrier activity, heme binding, iron ion binding, oxidoreductase activity, acting on paired donors and with incorporation or reduction of molecular oxygen, more                                  | prot_ID_417            | An09g01270 |

ECS

|                   |     |      |                                                                                                                                                                                                                                                        |                  |                   |     |
|-------------------|-----|------|--------------------------------------------------------------------------------------------------------------------------------------------------------------------------------------------------------------------------------------------------------|------------------|-------------------|-----|
| An09g01280        | 1   | 271  | Questionable ORF                                                                                                                                                                                                                                       | prot_ID_67       | An09g01280        |     |
| <b>An09g01290</b> | 0   | 0    | Putative polyketide synthase (PKS)                                                                                                                                                                                                                     | <b>prot_ID_4</b> | <b>An09g01290</b> |     |
| An09g01300        | -1  | 218  | Protein of unknown function<br>Domain(s) with predicted sequence-specific DNA binding<br>RNA polymerase II transcription factor activity, sequence-<br>specific DNA binding transcription factor activity, zinc ion<br>binding activity                | prot_ID_190      | An09g01300        |     |
| An09g01310        | -2  | 814  | Domain(s) with predicted UDP-N-acetylmuramate<br>dehydrogenase activity, flavin adenine dinucleotide<br>binding activity and role in oxidation-reduction process                                                                                       | prot_ID_602      | An09g01310        |     |
| An09g01320        | -3  | 595  | 2,3-oxidosqualene-lanosterol cyclase                                                                                                                                                                                                                   | prot_ID_207      | An09g01320        |     |
| An09g01330        | -4  | 366  | Putative leukotriene B(4) omega-hydroxylase cytochrome<br>P450                                                                                                                                                                                         | prot_ID_278      | An09g01330        |     |
| An09g01340        | -5  | 744  | Protein of unknown function                                                                                                                                                                                                                            | prot_ID_628      | An09g01340        | ECS |
| An09g01350        | -6  | 458  | Ortholog of A. nidulans FGSC A4 : AN1643, AN1704,<br>AN7062, A. fumigatus Af293 : Afu2g14410, Afu4g01500<br>and A. niger CBS 513.88 : An18g01050, An04g02710                                                                                           | prot_ID_537      | An09g01350        |     |
| An09g01370        | -7  | 439  | Domain(s) with predicted UDP-N-acetylmuramate<br>dehydrogenase activity, flavin adenine dinucleotide<br>binding activity and role in oxidation-reduction process                                                                                       | prot_ID_553      | An09g01370        |     |
| An09g01380        | -8  | 568  | Domain(s) with predicted DNA binding, zinc ion binding<br>activity, role in transcription, DNA-dependent and nucleus<br>localization                                                                                                                   | prot_ID_82       | An09g01380        |     |
| An09g01390        | -9  | 274  |                                                                                                                                                                                                                                                        | prot_ID_39       | An09g01390        |     |
| An09g01400        | -10 | 537  | Domain(s) with predicted electron carrier activity, heme<br>binding, iron ion binding, oxidoreductase activity, acting<br>on paired donors, with incorporation or reduction of<br>molecular oxygen activity and role in oxidation-reduction<br>process | n/a              | An09g01400        |     |
| An09g01410        | -11 | 118  | Domain(s) with predicted cell outer membrane, integral<br>to membrane localization                                                                                                                                                                     | n/a              | An09g01410        |     |
| An09g01420        | -12 | 213  | Domain(s) with predicted nucleotide binding activity                                                                                                                                                                                                   | n/a              | An09g01420        |     |
| An09g01430        | -13 | 968  | Domain(s) with predicted oxidoreductase activity and role<br>in oxidation-reduction process                                                                                                                                                            | n/a              | An09g01430        |     |
| An09g01440        | -14 | 853  |                                                                                                                                                                                                                                                        | n/a              | An09g01440        |     |
| An09g01450        | -15 | 1553 |                                                                                                                                                                                                                                                        | n/a              | An09g01450        |     |
| An09g01460        | -16 | 599  | Ortholog of A. nidulans FGSC A4 : AN8462, A. niger CBS<br>513.88 : An03g03400, A. brasiliensis : Aspbr1_0131393,<br>A. niger ATCC 1015 : 43481-mRNA, 44376-mRNA and A.<br>acidus : Aspfo1_0194567                                                      | n/a              | An09g01460        |     |

## An09g01690 cluster

NO ATCC 1015 orthologous cluster

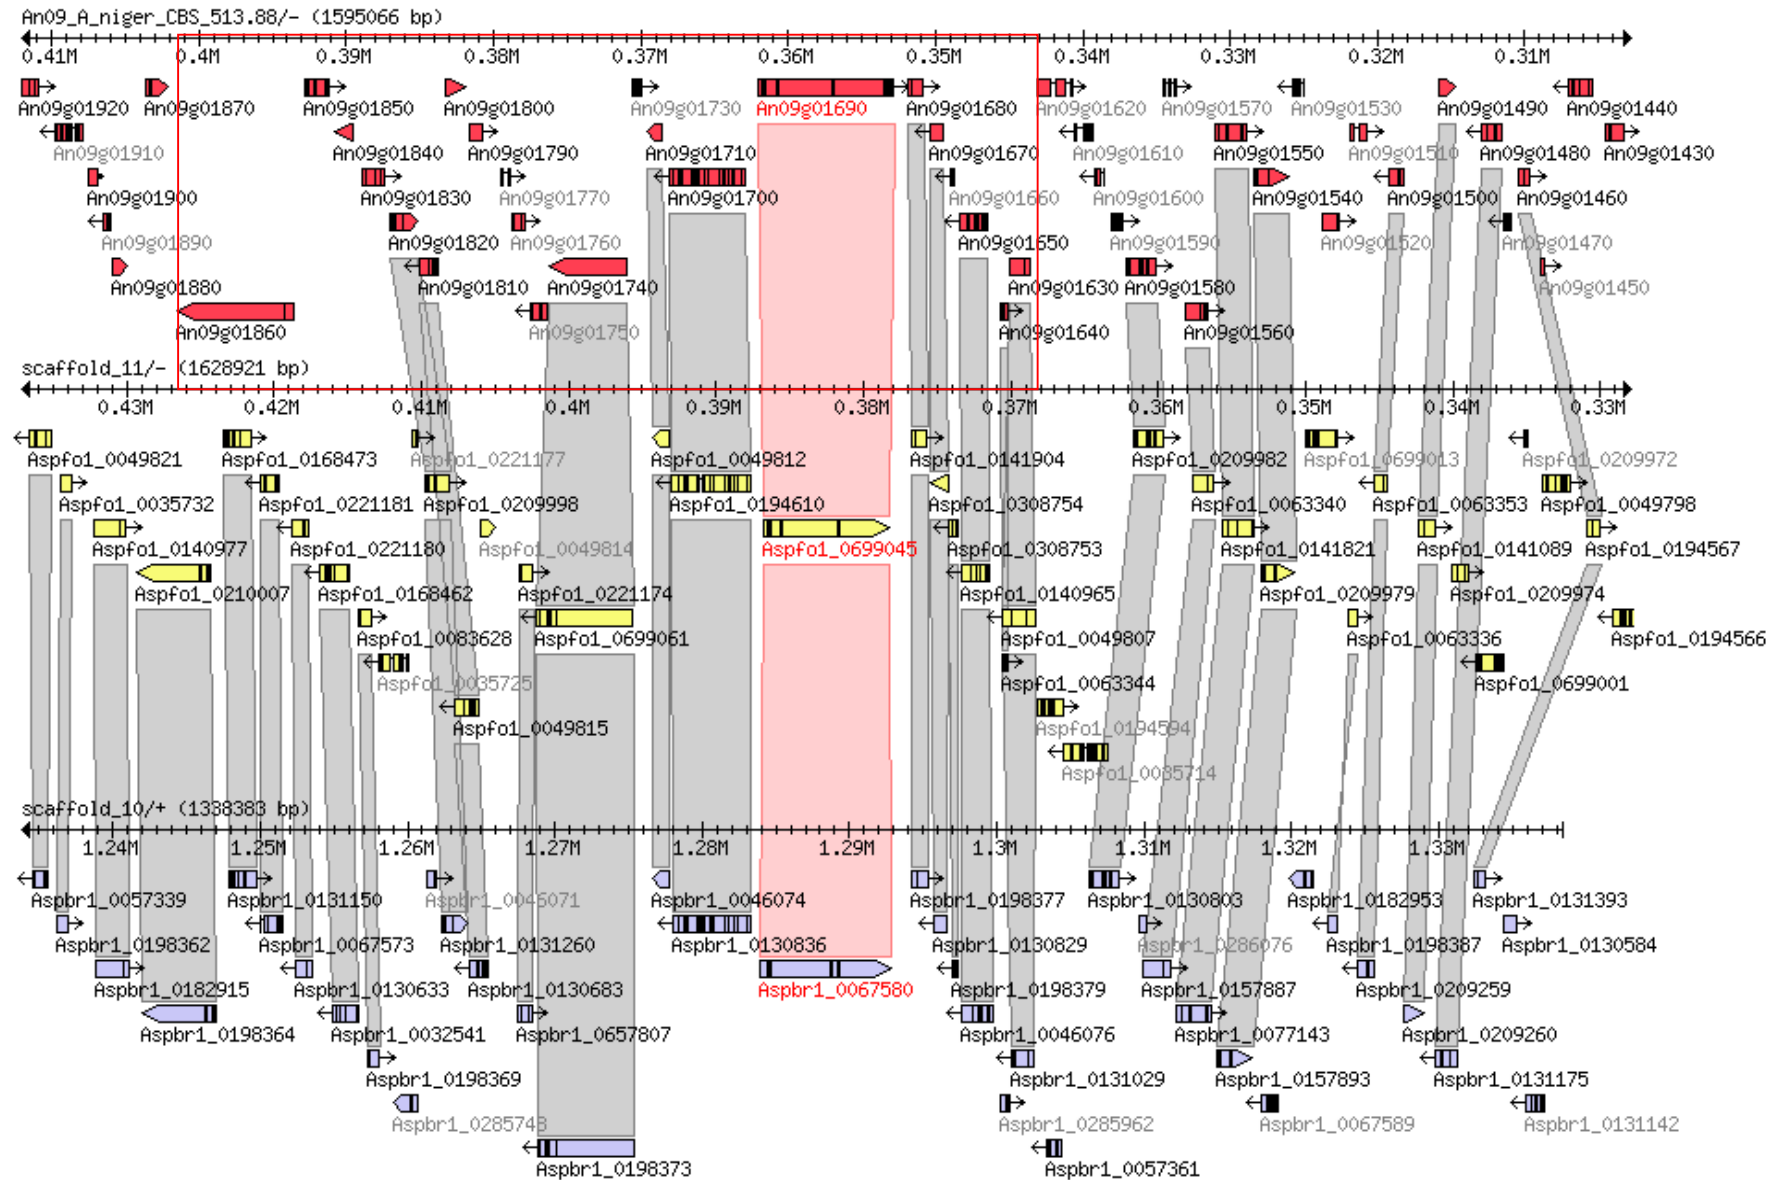

**An09g01690 cluster**

| Gene id (SMURF)   | Gene positions | Gene distance | AspGD name | AspGD description line or supplemental annotation Domain(s) with predicted transferase activity, transferring glycosyl groups activity and membrane localization                                                                     | protein ID (antiSMASH) | AspGD ID          |     |
|-------------------|----------------|---------------|------------|--------------------------------------------------------------------------------------------------------------------------------------------------------------------------------------------------------------------------------------|------------------------|-------------------|-----|
| n/a               |                |               |            |                                                                                                                                                                                                                                      | prot_ID_151            | An09g01560        |     |
| n/a               |                |               |            |                                                                                                                                                                                                                                      | prot_ID_281            | An09g01570        |     |
| n/a               |                |               |            | Ortholog of <i>A. nidulans</i> FGSC A4 : AN3530, AN2658, <i>A. fumigatus</i> Af293 : Afu1g13760, Afu4g00490, Afu4g14350, <i>A. oryzae</i> RIB40 : AO090166000071 and <i>A. niger</i> ATCC 1015 : 188861-mRNA                         | prot_ID_248            | An09g01580        |     |
| n/a               |                |               |            | Protein of unknown function                                                                                                                                                                                                          | prot_ID_206            | An09g01590        |     |
| n/a               |                |               |            | Protein of unknown function                                                                                                                                                                                                          | prot_ID_369            | An09g01600        |     |
| n/a               |                |               |            | Protein of unknown function                                                                                                                                                                                                          | prot_ID_6              | An09g01610        |     |
| n/a               |                |               |            | Protein of unknown function                                                                                                                                                                                                          | prot_ID_287            | An09g01620        |     |
| n/a               |                |               |            | Domain(s) with predicted acid phosphatase activity                                                                                                                                                                                   | prot_ID_237            | An09g01630        | ECS |
| n/a               |                |               |            | Ortholog of <i>A. acidus</i> : Aspfo1_0063344                                                                                                                                                                                        | prot_ID_453            | An09g01640        |     |
| An09g01650        | 4              | 400           |            | Domain(s) with predicted role in transmembrane transport and integral to membrane localization                                                                                                                                       | prot_ID_81             | An09g01650        |     |
| An09g01660        | 3              | 530           |            | Ortholog(s) have role in nucleotide-excision repair, phosphorylation of RNA polymerase II C-terminal domain, transcription from RNA polymerase II promoter and core TFIIF complex, holo TFIIF complex localization                   | prot_ID_438            | An09g01660        |     |
| An09g01670        | 2              | 418           |            | Ortholog of <i>A. brasiliensis</i> : Aspbr1_0130829, <i>A. acidus</i> : Aspfo1_0308754 and <i>Aspergillus carbonarius</i> ITEM 5010 : Acar5010_131745                                                                                | prot_ID_266            | An09g01670        |     |
| An09g01680        | 1              | 903           |            | Domain(s) with predicted role in response to stress and integral to membrane localization                                                                                                                                            | prot_ID_234            | An09g01680        |     |
| <b>An09g01690</b> | 0              | 0             |            | Putative nonribosomal peptide synthase (NRPS) Domain(s) with predicted ATP binding, ATPase activity, coupled to transmembrane movement of substances activity, role in transmembrane transport and integral to membrane localization | <b>prot_ID_152</b>     | <b>An09g01690</b> |     |
| An09g01700        | -1             | 928           |            | Ortholog of <i>A. nidulans</i> FGSC A4 : AN0788, <i>A. niger</i> CBS 513.88 : An09g02430, An03g05960, An09g00710 and <i>A. oryzae</i> RIB40 : AO090003000250, AO090010000570, AO090023000882, AO090120000022, AO090012000900         | prot_ID_64             | An09g01700        |     |
| An09g01710        | -2             | 424           |            | Protein of unknown function                                                                                                                                                                                                          | prot_ID_565            | An09g01710        |     |
| An09g01730        | -3             | 404           |            | Ortholog(s) have role in fatty acid biosynthetic process, secondary metabolic process                                                                                                                                                | prot_ID_627            | An09g01730        |     |
| An09g01740        | -4             | 397           |            |                                                                                                                                                                                                                                      | prot_ID_241            | An09g01740        |     |

|            |     |      |                                                                                                                                                                                                           |             |            |         |
|------------|-----|------|-----------------------------------------------------------------------------------------------------------------------------------------------------------------------------------------------------------|-------------|------------|---------|
| An09g01750 | -5  | 102  | Domain(s) with predicted fatty acid synthase activity, role in fatty acid biosynthetic process, oxidation-reduction process and fatty acid synthase complex localization                                  | prot_ID_325 | An09g01750 |         |
| An09g01760 | -6  | 447  | Protein of unknown function                                                                                                                                                                               | prot_ID_73  | An09g01760 |         |
| An09g01770 | -7  | 94   | Protein of unknown function                                                                                                                                                                               | prot_ID_393 | An09g01770 |         |
| An09g01790 | -8  | 1272 | Ortholog(s) have role in asperfuranone biosynthetic process, secondary metabolic process<br>Domain(s) with predicted transferase activity, transferring acyl groups other than amino-acyl groups activity | prot_ID_116 | An09g01790 |         |
| An09g01800 | -9  | 328  | Domain(s) with predicted catalytic activity, coenzyme binding, nucleotide binding activity and role in cellular metabolic process                                                                         | prot_ID_303 | An09g01800 |         |
| An09g01810 | -10 | 405  |                                                                                                                                                                                                           | n/a         | An09g01810 |         |
| An09g01820 | -11 | 209  | Ferulate:CoA ligase (AMP-forming)                                                                                                                                                                         | n/a         | An09g01820 |         |
| An09g01830 | -12 | 316  | Ortholog(s) have role in asperfuranone biosynthetic process, secondary metabolic process                                                                                                                  | n/a         | An09g01830 |         |
| An09g01840 | -13 | 553  | Salicylate hydroxylase                                                                                                                                                                                    | n/a         | An09g01840 |         |
| An09g01850 | -14 | 184  | 3-hydroxybenzoate 4-hydroxylase; benzoate 4-monooxygenase                                                                                                                                                 | n/a         | An09g01850 |         |
| An09g01860 | -15 | 735  | Putative polyketide synthase (PKS)                                                                                                                                                                        | n/a         | An09g01860 | FA, ECS |

## An09g01860 cluster

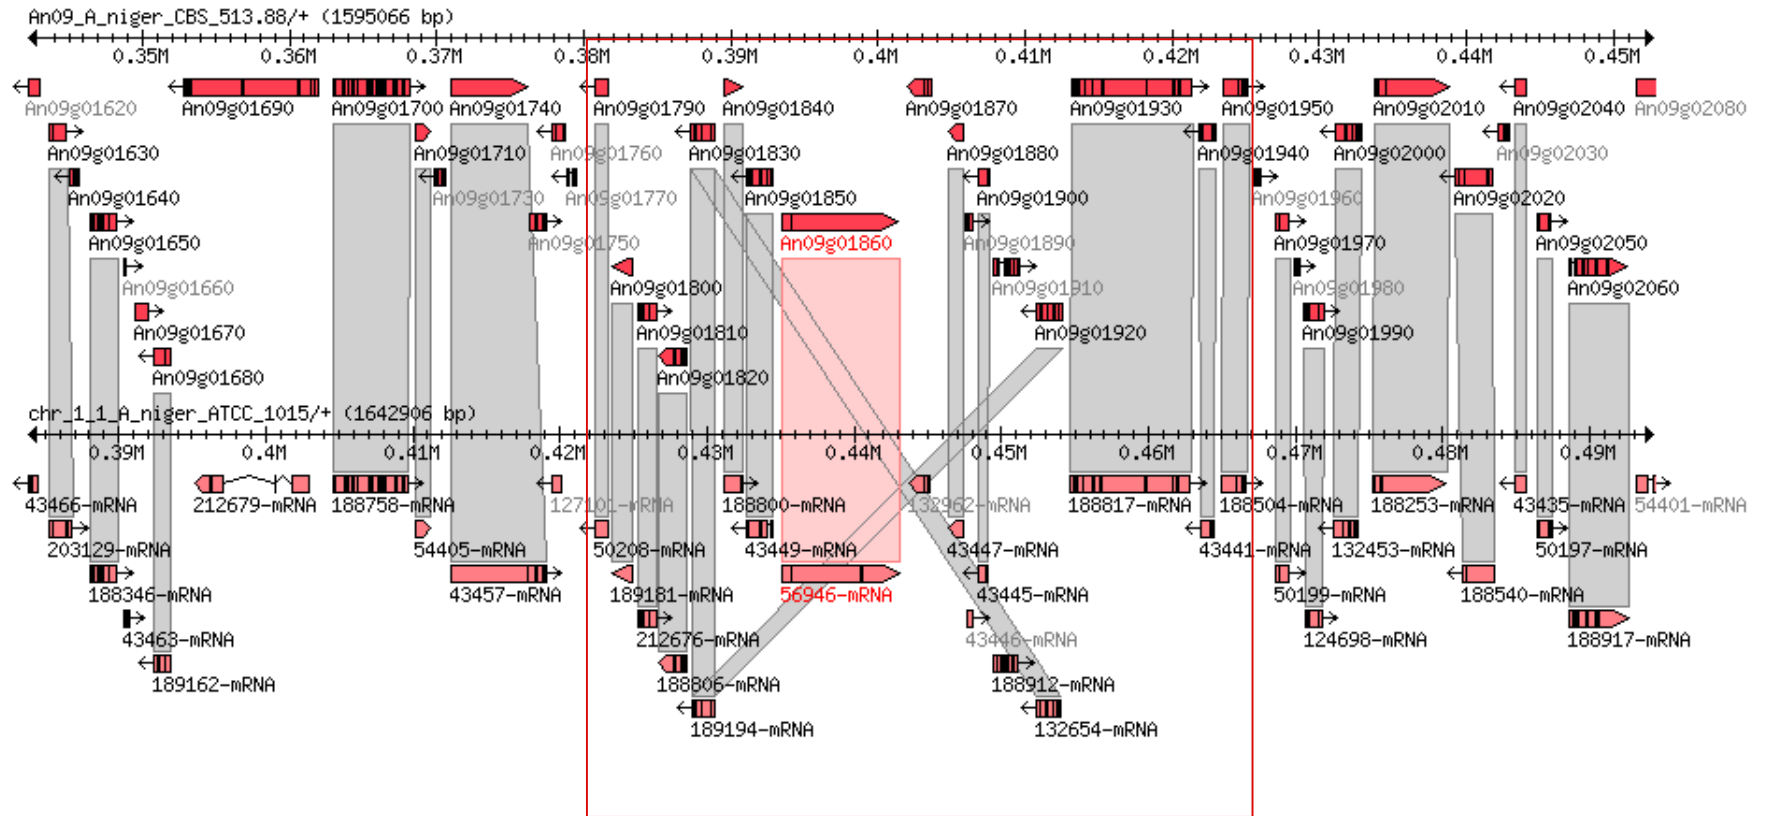



**An09g01860 cluster**

| Gene id (SMURF)   | Gene positions | Gene distance | AspGD name | AspGD description line or supplemental annotation                                                                                                                                                           | protein ID (antiSMASH) | AspGD ID          |
|-------------------|----------------|---------------|------------|-------------------------------------------------------------------------------------------------------------------------------------------------------------------------------------------------------------|------------------------|-------------------|
| An09g01690        | 15             | 928           |            | Domain(s) with predicted ACP phosphopantetheine attachment site binding involved in fatty acid biosynthetic process, ligase activity                                                                        | n/a                    | An09g01690        |
| An09g01700        | 14             | 424           |            | Domain(s) with predicted ATP binding, ATPase activity, coupled to transmembrane movement of substances activity, role in transmembrane transport and integral to membrane localization                      | n/a                    | An09g01700        |
| An09g01710        | 13             | 404           |            | Ortholog of A. nidulans FGSC A4 : AN0788, A. niger CBS 513.88 : An09g02430, An03g05960, An09g00710 and A. oryzae RIB40 : AO090003000250, AO090010000570, AO090023000882, AO090120000022, AO090012000900     | n/a                    | An09g01710        |
| An09g01730        | 12             | 397           |            | Protein of unknown function                                                                                                                                                                                 | n/a                    | An09g01730        |
| An09g01740        | 11             | 102           |            | Ortholog(s) have role in fatty acid biosynthetic process, secondary metabolic process                                                                                                                       | prot_ID_241            | An09g01740        |
| An09g01750        | 10             | 447           |            | Domain(s) with predicted fatty acid synthase activity, role in fatty acid biosynthetic process, oxidation-reduction process and fatty acid synthase complex localization                                    | prot_ID_325            | An09g01750        |
| An09g01760        | 9              | 94            |            | Protein of unknown function                                                                                                                                                                                 | prot_ID_73             | An09g01760        |
| An09g01770        | 8              | 1272          |            | Protein of unknown function                                                                                                                                                                                 | prot_ID_393            | An09g01770        |
| An09g01790        | 7              | 328           |            | Ortholog(s) have role in asperfuranone biosynthetic process, secondary metabolic process                                                                                                                    | prot_ID_116            | An09g01790        |
| An09g01800        | 6              | 405           |            | Domain(s) with predicted transferase activity, transferring acyl groups other than amino-acyl groups activity                                                                                               | prot_ID_303            | An09g01800        |
| An09g01810        | 5              | 209           |            | Domain(s) with predicted catalytic activity, coenzyme binding, nucleotide binding activity and role in cellular metabolic process                                                                           | prot_ID_609            | An09g01810        |
| An09g01820        | 4              | 316           |            | Ferulate:CoA ligase (AMP-forming)                                                                                                                                                                           | prot_ID_544            | An09g01820        |
| An09g01830        | 3              | 553           |            | Ortholog(s) have role in asperfuranone biosynthetic process, secondary metabolic process                                                                                                                    | prot_ID_121            | An09g01830        |
| An09g01840        | 2              | 184           |            | Salicylate hydroxylase                                                                                                                                                                                      | prot_ID_598            | An09g01840        |
| An09g01850        | 1              | 735           |            | 3-hydroxybenzoate 4-hydroxylase; benzoate 4-monooxygenase                                                                                                                                                   | prot_ID_533            | An09g01850        |
| <b>An09g01860</b> | 0              | 0             |            | Putative polyketide synthase (PKS)                                                                                                                                                                          | <b>prot_ID_333</b>     | <b>An09g01860</b> |
| An09g01870        | -1             | 499           |            | Domain(s) with predicted DNA binding, sequence-specific DNA binding RNA polymerase II transcription factor activity, sequence-specific DNA binding transcription factor activity, zinc ion binding activity | prot_ID_356            | An09g01870        |

ECS, FA

|            |     |      |                                                                                                                                                                                                                                                                                                                    |             |            |         |
|------------|-----|------|--------------------------------------------------------------------------------------------------------------------------------------------------------------------------------------------------------------------------------------------------------------------------------------------------------------------|-------------|------------|---------|
| An09g01880 | -2  | 1174 | Domain(s) with predicted nucleotide binding, oxidoreductase activity, zinc ion binding activity and role in oxidation-reduction process                                                                                                                                                                            | prot_ID_346 | An09g01880 |         |
| An09g01890 | -3  | 105  | Protein of unknown function                                                                                                                                                                                                                                                                                        | prot_ID_89  | An09g01890 |         |
| An09g01900 | -4  | 318  | Ortholog of <i>A. niger</i> ATCC 1015 : 43445-mRNA                                                                                                                                                                                                                                                                 | prot_ID_215 | An09g01900 |         |
| An09g01910 | -5  | 326  | Domain(s) with predicted role in transmembrane transport and integral to membrane localization                                                                                                                                                                                                                     | prot_ID_526 | An09g01910 |         |
| An09g01920 | -6  | 1019 | Ortholog(s) have role in asperfuranone biosynthetic process, secondary metabolic process<br>Ortholog(s) have role in asperfuranone biosynthetic process, emericellamide biosynthetic process, monodictyphenone biosynthetic process, o-orsellinic acid biosynthetic process, sterigmatocystin biosynthetic process | prot_ID_426 | An09g01920 |         |
| An09g01930 | -7  | 630  | Domain(s) with predicted role in response to stress and integral to membrane localization                                                                                                                                                                                                                          | prot_ID_400 | An09g01930 |         |
| An09g01940 | -8  | 394  | Ortholog(s) have catalytic activity and role in sterigmatocystin biosynthetic process                                                                                                                                                                                                                              | prot_ID_147 | An09g01940 |         |
| An09g01950 | -9  | 519  | Protein of unknown function                                                                                                                                                                                                                                                                                        | prot_ID_252 | An09g01950 | ECS, FA |
| An09g01960 | -10 | 322  | Domain(s) with predicted nucleotide binding, oxidoreductase activity and role in oxidation-reduction process                                                                                                                                                                                                       | prot_ID_140 | An09g01960 |         |
| An09g01970 | -11 | 787  | Protein of unknown function                                                                                                                                                                                                                                                                                        | prot_ID_43  | An09g01970 |         |
| An09g01980 | -12 | 178  | Branched chain amino acid aminotransferase                                                                                                                                                                                                                                                                         | prot_ID_42  | An09g01980 |         |
| An09g01990 | -13 | 272  | Domain(s) with predicted electron carrier activity, heme binding, iron ion binding, oxidoreductase activity, acting on paired donors, with incorporation or reduction of molecular oxygen activity and role in oxidation-reduction process                                                                         | prot_ID_269 | An09g01990 |         |
| An09g02000 | -14 | 814  | Fatty-acid synthase                                                                                                                                                                                                                                                                                                | prot_ID_99  | An09g02000 |         |
| An09g02010 | -15 | 869  | Domain(s) with predicted GTP binding, GTPase activity                                                                                                                                                                                                                                                              | prot_ID_40  | An09g02010 |         |
| An09g02020 | -16 | 400  |                                                                                                                                                                                                                                                                                                                    | prot_ID_607 | An09g02020 |         |

## An09g02100 cluster

No ATCC 1015 match, no manual prediction made

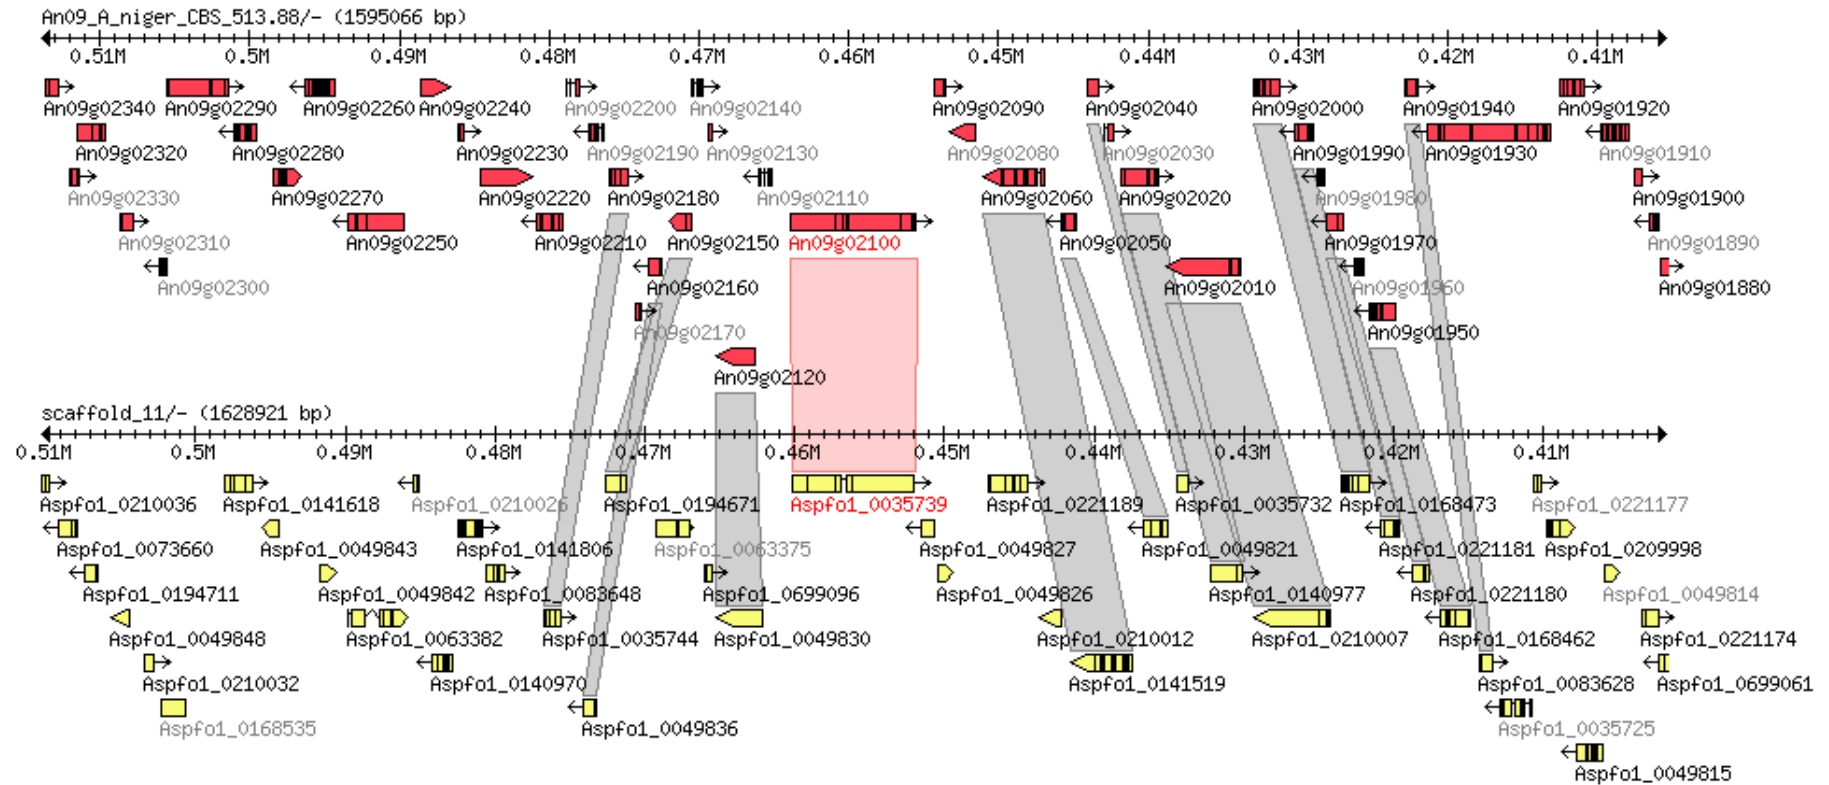

**An09g02100 cluster**

| Gene id (SMURF)   | Gene positions | Gene distance | AspGD name | AspGD description line or supplemental annotation                                                                                                                                                                                                                                                     | protein ID (antiSMASH) | AspGD ID          |
|-------------------|----------------|---------------|------------|-------------------------------------------------------------------------------------------------------------------------------------------------------------------------------------------------------------------------------------------------------------------------------------------------------|------------------------|-------------------|
| An09g01980        | 11             | 272           |            |                                                                                                                                                                                                                                                                                                       | prot_ID_252            | An09g01980        |
| An09g01990        | 10             | 814           |            | Branched chain amino acid aminotransferase                                                                                                                                                                                                                                                            | prot_ID_140            | An09g01990        |
| An09g02000        | 9              | 869           |            | Domain(s) with predicted electron carrier activity, heme binding, iron ion binding, oxidoreductase activity, acting on paired donors, with incorporation or reduction of molecular oxygen activity and role in oxidation-reduction process                                                            | prot_ID_43             |                   |
| An09g02010        | 8              | 400           |            | Fatty-acid synthase                                                                                                                                                                                                                                                                                   | prot_ID_42             | An09g02010        |
| An09g02020        | 7              | 356           |            | Domain(s) with predicted GTP binding, GTPase activity                                                                                                                                                                                                                                                 | prot_ID_269            | An09g02020        |
| An09g02030        | 6              | 290           |            |                                                                                                                                                                                                                                                                                                       | prot_ID_99             | An09g02030        |
| An09g02040        | 5              | 785           |            | Ortholog of <i>A. nidulans</i> FGSC A4 : AN11160, <i>A. oryzae</i> RIB40 : AO090003001445, <i>A. brasiliensis</i> : Aspbr1_0198362, <i>A. niger</i> ATCC 1015 : 43435-mRNA and <i>Aspergillus flavus</i> NRRL 3357 : AFL2T_01636                                                                      | prot_ID_40             | An09g02040        |
| An09g02050        | 4              | 1157          |            | Domain(s) with predicted catalytic activity and role in metabolic process<br>Ortholog of <i>A. nidulans</i> FGSC A4 : AN5037, <i>A. niger</i> ATCC 1015 : 188917-mRNA, <i>A. versicolor</i> : Aspve1_0152207, <i>Aspergillus niger</i> ATCC 1015 : 170720-mRNA and <i>A. sydowii</i> : Aspsy1_0137186 | prot_ID_607            | An09g02050        |
| An09g02060        | 3              | 723           |            |                                                                                                                                                                                                                                                                                                       | prot_ID_580            | An09g02060        |
| An09g02080        | 2              | 411           |            | Domain(s) with predicted nucleic acid binding activity                                                                                                                                                                                                                                                | prot_ID_170            | An09g02080        |
| An09g02090        | 1              | 1087          |            | Ortholog of <i>A. nidulans</i> FGSC A4 : AN7124, <i>A. niger</i> CBS 513.88 : An12g05320, <i>A. oryzae</i> RIB40 : AO090038000612, AO090003001456 and <i>A. brasiliensis</i> : Aspbr1_0044515, Aspbr1_0121978, Aspbr1_0257373                                                                         | prot_ID_357            | An09g02090        |
| <b>An09g02100</b> | 0              | 0             |            | Domain(s) with predicted ACP phosphopantetheine attachment site binding involved in fatty acid biosynthetic process, hydrolase activity, acting on ester bonds, nucleotide binding, phosphopantetheine binding, transferase activity                                                                  | <b>prot_ID_343</b>     | <b>An09g02100</b> |
| An09g02110        | -1             | 1235          |            |                                                                                                                                                                                                                                                                                                       | prot_ID_572            | An09g02110        |
| An09g02120        | -2             | 262           |            | Domain(s) with predicted oxidoreductase activity, acting on paired donors, with incorporation or reduction of molecular oxygen, 2-oxoglutarate as one donor, and incorporation of one atom each of oxygen into both donors activity                                                                   | prot_ID_541            | An09g02120        |
| An09g02130        | -3             | 278           |            |                                                                                                                                                                                                                                                                                                       | prot_ID_579            | An09g02130        |
| An09g02140        | -4             | 355           |            |                                                                                                                                                                                                                                                                                                       | prot_ID_666            | An09g02140        |

|            |     |     |                                                                                                                                                                                                              |             |            |
|------------|-----|-----|--------------------------------------------------------------------------------------------------------------------------------------------------------------------------------------------------------------|-------------|------------|
| An09g02150 | -5  | 41  | Domain(s) with predicted monooxygenase activity and role in oxidation-reduction process                                                                                                                      | prot_ID_115 | An09g02150 |
| An09g02160 | -6  | 557 | Ortholog(s) have rhamnogalacturonan acetylcetase activity and role in pectin catabolic process                                                                                                               | prot_ID_420 | An09g02160 |
| An09g02170 | -7  | 514 |                                                                                                                                                                                                              | prot_ID_143 | An09g02170 |
| An09g02180 | -8  | 703 | Triacylglycerol lipase                                                                                                                                                                                       | prot_ID_8   | An09g02180 |
| An09g02190 | -9  | 364 |                                                                                                                                                                                                              | prot_ID_536 | An09g02190 |
| An09g02200 | -10 | 424 |                                                                                                                                                                                                              | prot_ID_279 | An09g02200 |
| An09g02210 | -11 | 272 | Domain(s) with predicted role in transmembrane transport and integral to membrane localization                                                                                                               | prot_ID_409 | An09g02210 |
| An09g02220 | -12 | 322 | Domain(s) with predicted DNA-directed DNA polymerase activity, damaged DNA binding, magnesium ion binding activity, role in DNA repair and intracellular localization                                        | prot_ID_486 | An09g02220 |
| An09g02230 | -13 | 950 | Ortholog of <i>A. nidulans</i> FGSC A4 : AN9338, AN7059, <i>A. niger</i> CBS 513.88 : An12g02100, <i>A. oryzae</i> RIB40 : AO090138000084 and <i>A. niger</i> ATCC 1015 : 50192-mRNA, 50339-mRNA, 50930-mRNA | n/a         | An09g02230 |

# An09g05110 cluster

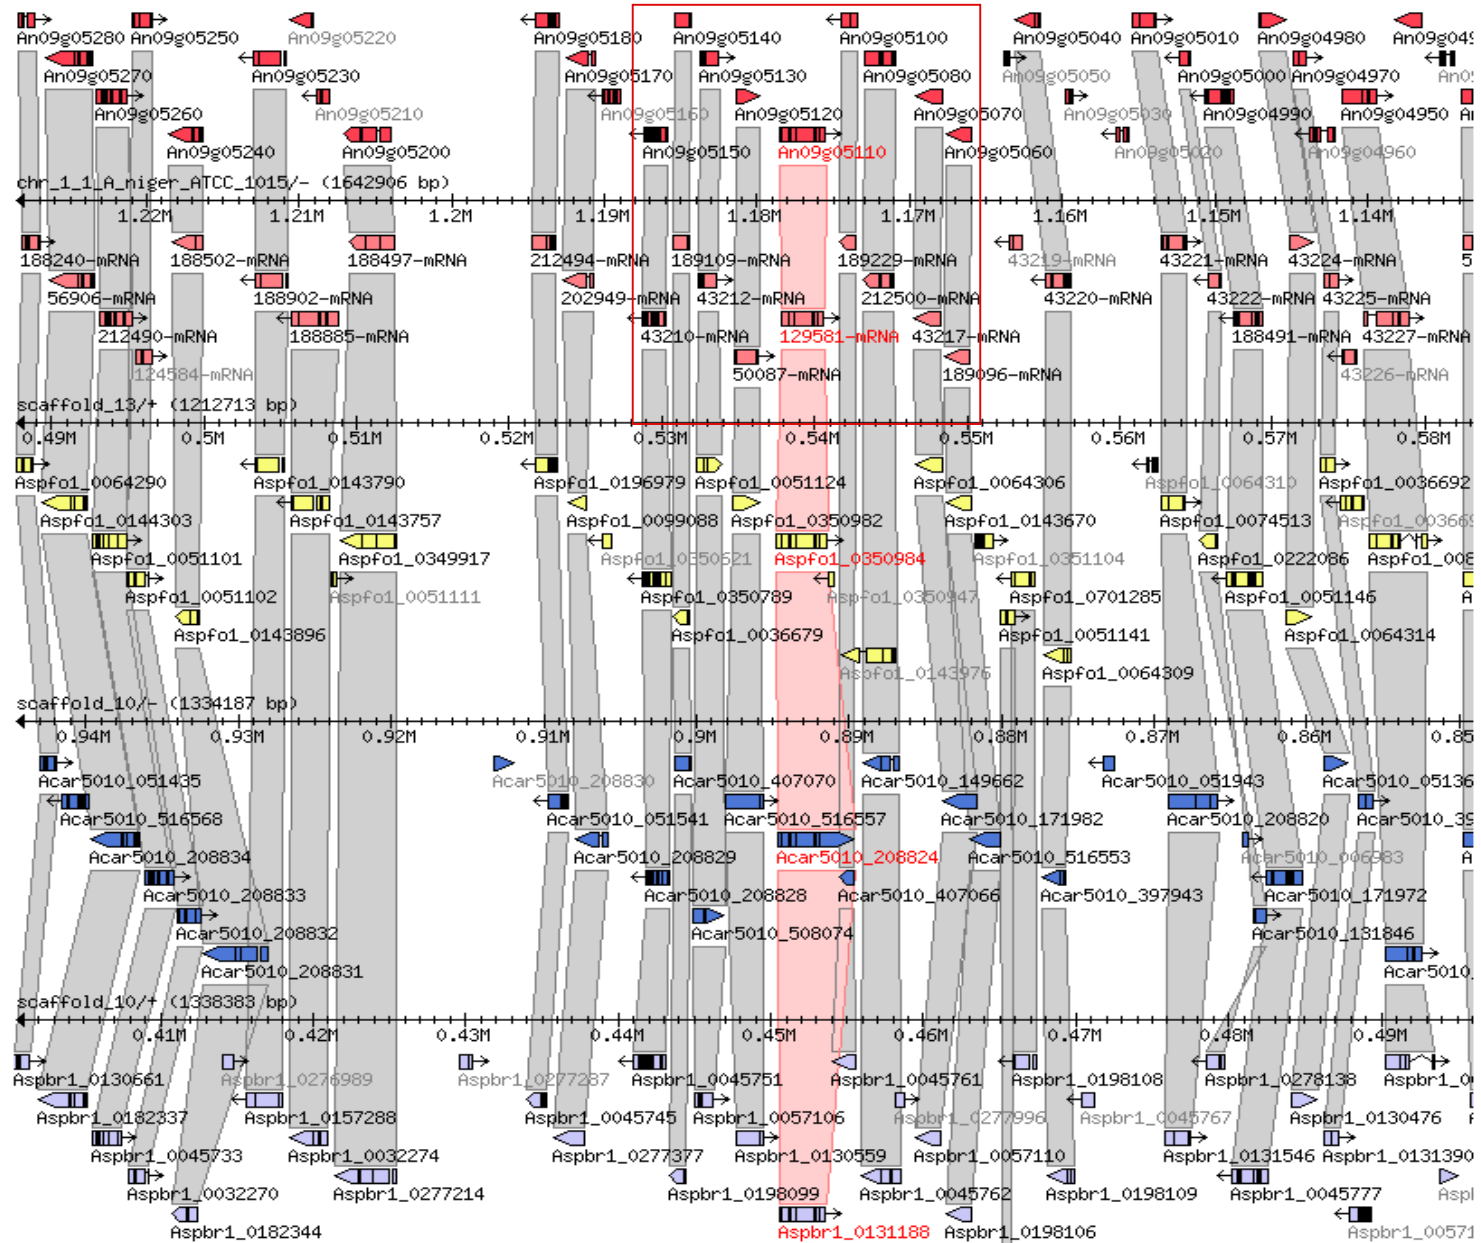

**An09g05110 cluster**

| Gene id (SMURF) | Gene positions | Gene distance | AspGD name | AspGD description line or supplemental annotation                                                                                                                                                                                                                                    | protein ID (antiSMASH) | AspGD ID   |     |
|-----------------|----------------|---------------|------------|--------------------------------------------------------------------------------------------------------------------------------------------------------------------------------------------------------------------------------------------------------------------------------------|------------------------|------------|-----|
| An09g04960      | 14             | 95            |            | Domain(s) with predicted ATP binding, protein kinase activity and role in protein phosphorylation<br>Ortholog of A. nidulans FGSC A4 : AN6420, A. fumigatus Af293 : Afu2g01100, A. oryzae RIB40 : AO090005001149, A. niger ATCC 1015 : 43225-mRNA and A. versicolor : Aspve1_0041410 | n/a                    | An09g04960 |     |
| An09g04970      | 13             | 427           |            | Domain(s) with predicted sequence-specific DNA binding RNA polymerase II transcription factor activity, sequence-specific DNA binding transcription factor activity, zinc ion binding activity                                                                                       | n/a                    | An09g04970 |     |
| An09g04980      | 12             | 1696          |            | Putative amidase/acetamidase                                                                                                                                                                                                                                                         | n/a                    | An09g04980 |     |
| An09g04990      | 11             | 864           |            | Ortholog of A. brasiliensis : Aspbr1_0278138, A. acidus : Aspfo1_0222086, A. niger ATCC 1015 : 43222-mRNA and Aspergillus carbonarius ITEM 5010 : Acar5010_131846                                                                                                                    | n/a                    | An09g04990 |     |
| An09g05000      | 10             | 1391          |            | Domain(s) with predicted amino acid transmembrane transporter activity, role in amino acid transmembrane transport and membrane localization                                                                                                                                         | prot_ID_161            | An09g05000 |     |
| An09g05010      | 9              | 204           |            | Protein of unknown function                                                                                                                                                                                                                                                          | prot_ID_457            | An09g05010 |     |
| An09g05020      | 8              | 2902          |            | Protein of unknown function                                                                                                                                                                                                                                                          | prot_ID_28             | An09g05020 |     |
| An09g05030      | 7              | 1647          |            | Ortholog of A. nidulans FGSC A4 : AN8167, A. fumigatus Af293 : Afu5g02950, A. oryzae RIB40 : AO090102000494, A. niger ATCC 1015 : 43220-mRNA and A. versicolor : Aspve1_0143405                                                                                                      | prot_ID_198            | An09g05030 |     |
| An09g05040      | 6              | 306           |            | Protein of unknown function                                                                                                                                                                                                                                                          | prot_ID_674            | An09g05040 |     |
| An09g05050      | 5              | 2048          |            | Ortholog(s) have role in kojic acid biosynthetic process, positive regulation of kojic acid biosynthetic process, positive regulation of secondary metabolite biosynthetic process, secondary metabolic process                                                                      | prot_ID_385            | An09g05050 | ECS |
| An09g05060      | 4              | 267           |            | Domain(s) with predicted role in transmembrane transport and integral to membrane localization                                                                                                                                                                                       | prot_ID_33             | An09g05060 |     |
| An09g05070      | 3              | 1335          |            | Domain(s) with predicted pyridoxal phosphate binding, transferase activity, transferring nitrogenous groups activity and role in biosynthetic process                                                                                                                                | prot_ID_539            | An09g05070 |     |
| An09g05080      | 2              | 455           |            | Ortholog of A. nidulans FGSC A4 : AN8173, A. fumigatus Af293 : Afu5g03000, A. oryzae RIB40 : AO090102000499, A. niger ATCC 1015 : 189229-mRNA and A. versicolor : Aspve1_0057171                                                                                                     | prot_ID_490            | An09g05080 |     |
| An09g05100      | 1              | 930           |            |                                                                                                                                                                                                                                                                                      |                        | An09g05100 |     |

|                   |    |      |                                                                                                                                                                                      |                    |                   |     |
|-------------------|----|------|--------------------------------------------------------------------------------------------------------------------------------------------------------------------------------------|--------------------|-------------------|-----|
| <b>An09g05110</b> | 0  | 0    | Protein similar to nonribosomal peptide synthases (NRPS-like)                                                                                                                        | <b>prot_ID_581</b> | <b>An09g05110</b> |     |
| An09g05120        | -1 | 1346 | Triacylglycerol lipase                                                                                                                                                               | prot_ID_169        | An09g05120        |     |
| An09g05130        | -2 | 1070 | Domain(s) with predicted oxidoreductase activity and role in metabolic process                                                                                                       | prot_ID_268        | An09g05130        |     |
| n/a               |    |      | Domain(s) with predicted nucleotide binding activity                                                                                                                                 | prot_ID_588        | An09g05140        |     |
| n/a               |    |      | Domain(s) with predicted ferric iron binding, oxidoreductase activity, acting on single donors with incorporation of molecular oxygen, incorporation of two atoms of oxygen activity | prot_ID_515        | An09g05150        | ECS |
| n/a               |    |      | Protein of unknown function                                                                                                                                                          | prot_ID_313        | An09g05160        |     |
| n/a               |    |      | Domain(s) with predicted viral capsid localization                                                                                                                                   | prot_ID_199        | An09g05170        |     |
| n/a               |    |      | Domain(s) with predicted structural constituent of ribosome activity, role in translation and ribosome localization                                                                  | prot_ID_362        | An09g05180        |     |



## An09g05340 cluster

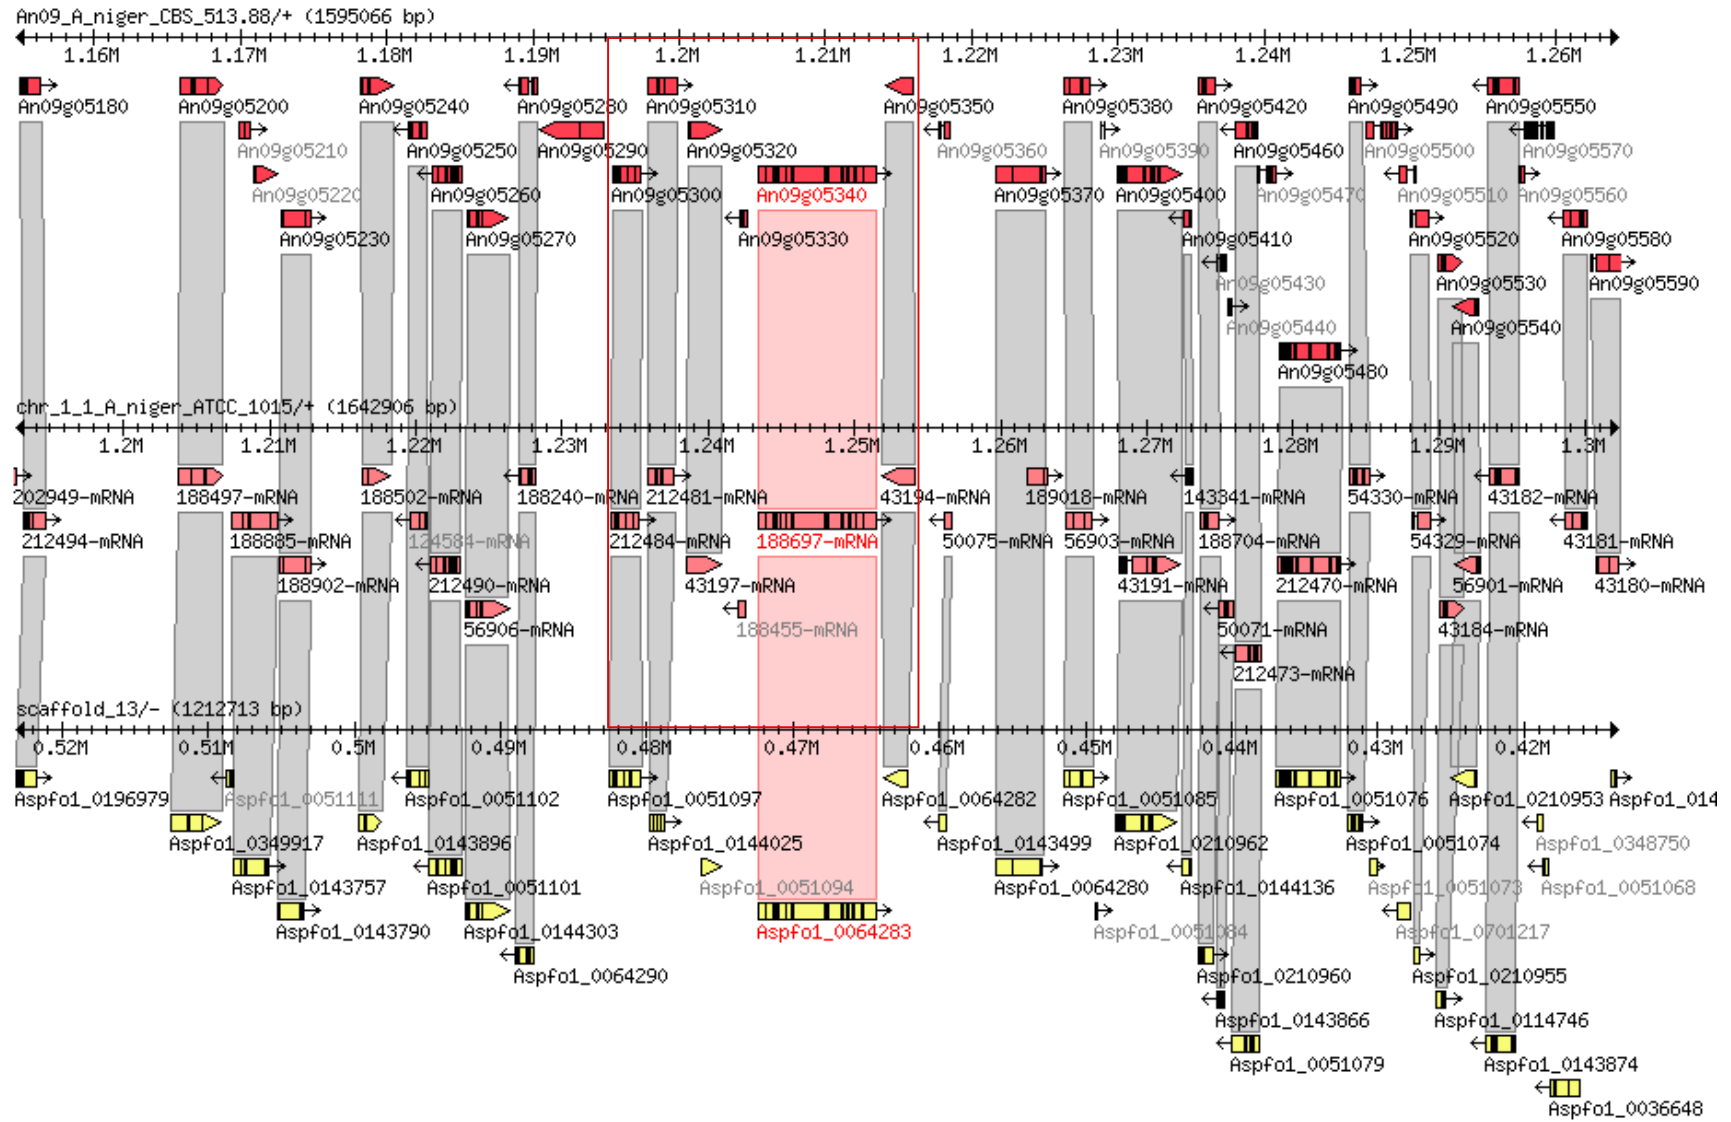

**An09g05340 cluster**

| Gene id (SMURF)   | Gene positions | Gene distance | AspGD name | AspGD description line or supplemental annotation                                                                                                                                                   | protein ID (antiSMASH) | AspGD ID          |     |
|-------------------|----------------|---------------|------------|-----------------------------------------------------------------------------------------------------------------------------------------------------------------------------------------------------|------------------------|-------------------|-----|
| n/a               |                |               |            | Ortholog of A. fumigatus Af293 : Afu5g03090, A. oryzae RIB40 : AO090102000512, A. niger ATCC 1015 : 56906-mRNA, A. versicolor : Aspve1_0178942 and A. sydowii : Aspsy1_0136686                      | prot_ID_488            | An09g05270        |     |
| n/a               |                |               |            | Ortholog of A. nidulans FGSC A4 : AN11053, A. fumigatus Af293 : Afu5g03110, A. niger CBS 513.88 : An01g14890 and A. oryzae RIB40 : AO090701000457, AO090102000514                                   | prot_ID_304            | An09g05280        |     |
| n/a               |                |               |            | Domain(s) with predicted 5'-3' exonuclease activity, nucleic acid binding activity, role in nucleobase-containing compound metabolic process and intracellular localization                         | prot_ID_596            | An09g05290        |     |
| n/a               |                |               |            | Ortholog of A. nidulans FGSC A4 : AN8187, A. fumigatus Af293 : Afu5g03130, A. oryzae RIB40 : AO090102000516, A. niger ATCC 1015 : 212484-mRNA and A. versicolor : Aspve1_0142812                    | prot_ID_587            | An09g05300        | ECS |
| An09g05310        | 3              | 1235          |            | GTP cyclohydrolase I<br>Ortholog of A. fumigatus Af293 : Afu5g03150, A. oryzae RIB40 : AO090102000518, A. niger ATCC 1015 : 43197-mRNA and Aspergillus carbonarius ITEM 5010 : Acar5010_508086      | prot_ID_167            | An09g05310        |     |
| An09g05320        | 2              | 1155          |            | Ortholog of A. nidulans FGSC A4 : AN9006, A. fumigatus Af293 : Afu3g02540, Afu6g11710, Afu7g08440, Afu5g00145, A. oryzae RIB40 : AO090038000212 and N. fischeri NRRL 181 : NFIA_004090, NFIA_057380 | prot_ID_35             | An09g05320        |     |
| An09g05330        | 1              | 694           |            | Putative polyketide synthase (PKS)                                                                                                                                                                  | prot_ID_194            | An09g05330        |     |
| <b>An09g05340</b> | 0              | 0             |            | Ortholog of A. niger CBS 513.88 : An08g08140, An15g05280, An04g02780, A. oryzae RIB40 : AO090010000573 and A. brasiliensis : Aspbr1_0030961, Aspbr1_0045725, Aspbr1_0155263, Aspbr1_0205665         | <b>prot_ID_597</b>     | <b>An09g05340</b> |     |
| An09g05350        | -1             | 558           |            | Domain(s) with predicted hydrolase activity and role in dUTP metabolic process                                                                                                                      | prot_ID_56             | An09g05350        | ECS |
| An09g05360        | -2             | 2047          |            | Domain(s) with predicted ATP binding, protein serine/threonine kinase activity and role in protein phosphorylation                                                                                  | prot_ID_150            | An09g05360        |     |
| n/a               |                |               |            | Domain(s) with predicted translation initiation factor activity, role in translational initiation and cytoplasm localization                                                                        | prot_ID_529            | An09g05370        |     |
| n/a               |                |               |            |                                                                                                                                                                                                     | prot_ID_186            | An09g05380        |     |
| n/a               |                |               |            |                                                                                                                                                                                                     | prot_ID_566            | An09g05390        |     |

n/a

Domain(s) with predicted cysteine-type peptidase activity and role in proteolysis

prot\_ID\_293

An09g05400

# An09g05730 cluster

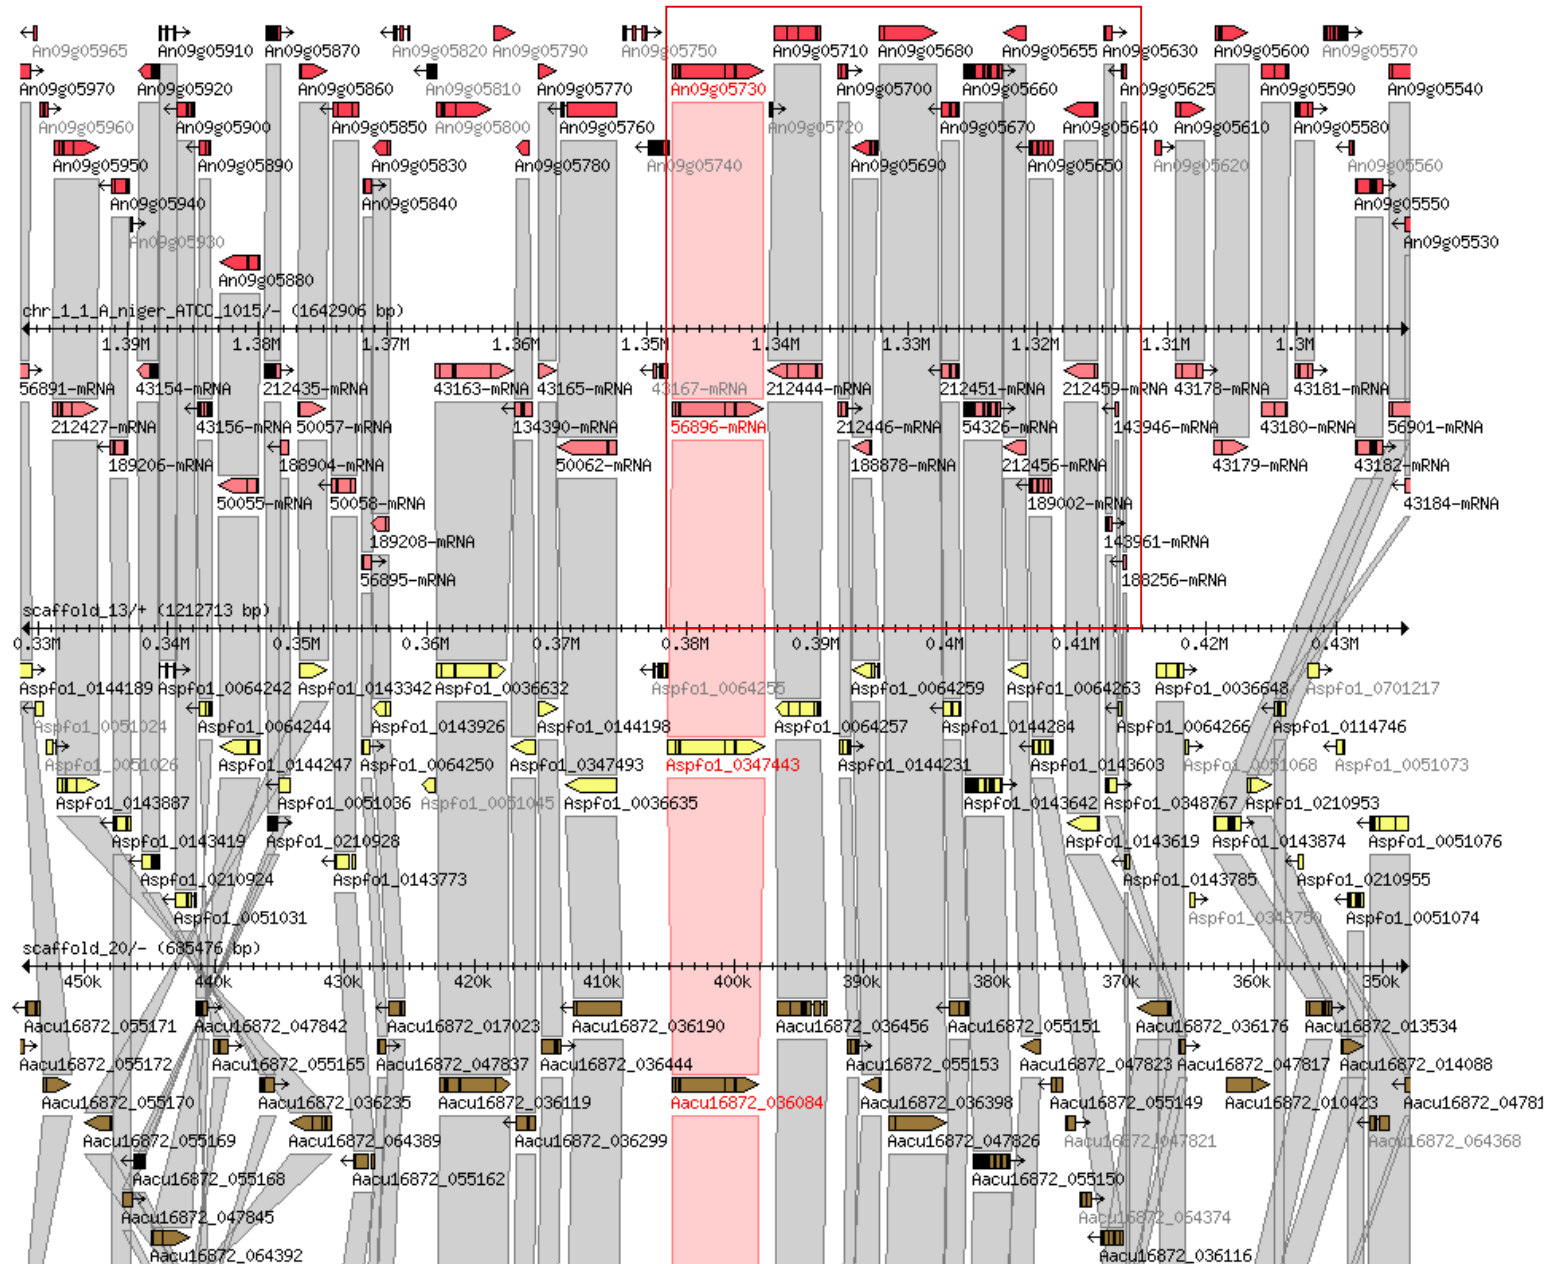

**An09g05730 cluster**

| Gene id (SMURF)   | Gene positions | Gene distance | AspGD name | AspGD description line or supplemental annotation                                                                                                                                                                                            | protein ID (antiSMASH) | AspGD ID          | ECS |
|-------------------|----------------|---------------|------------|----------------------------------------------------------------------------------------------------------------------------------------------------------------------------------------------------------------------------------------------|------------------------|-------------------|-----|
| n/a               |                |               |            | Protein of unknown function                                                                                                                                                                                                                  | n/a                    | An09g05625        | ECS |
| n/a               |                |               |            | Protein of unknown function                                                                                                                                                                                                                  | n/a                    | An09g05630        |     |
| n/a               |                |               |            | ATP-dependent DNA helicase                                                                                                                                                                                                                   | n/a                    | An09g05640        |     |
| n/a               |                |               |            | Protein of unknown function                                                                                                                                                                                                                  | n/a                    | An09g05650        |     |
| n/a               |                |               |            | Ortholog of <i>A. nidulans</i> FGSC A4 : AN8202, <i>A. fumigatus</i> Af293 : Afu5g03340, <i>A. oryzae</i> RIB40 : AO090102000539, <i>A. niger</i> ATCC 1015 : 212456-mRNA and <i>A. versicolor</i> : Aspve1_0089228                          | prot_ID_447            | An09g05655        |     |
| n/a               |                |               |            | NAD synthetase                                                                                                                                                                                                                               | prot_ID_249            | An09g05660        |     |
| n/a               |                |               |            | NAD pyrophosphatase                                                                                                                                                                                                                          | prot_ID_647            | An09g05670        |     |
| n/a               |                |               |            | Domain(s) with predicted DNA binding activity, role in telomere maintenance and nuclear chromosome, telomeric region localization                                                                                                            | prot_ID_142            | An09g05680        |     |
| n/a               |                |               |            | Domain(s) with predicted N,N-dimethylaniline monooxygenase activity, NADP binding, flavin adenine dinucleotide binding activity and role in oxidation-reduction process                                                                      | prot_ID_408            | An09g05690        |     |
| n/a               |                |               |            | Domain(s) with predicted metal ion binding, phosphoric diester hydrolase activity                                                                                                                                                            | prot_ID_306            | An09g05700        |     |
| An09g05710        | 2              | 170           |            | Domain(s) with predicted nucleus localization                                                                                                                                                                                                | prot_ID_83             | An09g05710        |     |
| An09g05720        | 1              | 775           |            | Protein of unknown function                                                                                                                                                                                                                  | prot_ID_94             | An09g05720        |     |
| <b>An09g05730</b> | 0              | 0             | fwnA       | Putative polyketide synthase (PKS) involved in both dihydroxynaphthalene (DHN) melanin and naphtho-gamma-pyrone production; required for wild-type black spore pigmentation; mutants have reduced ornamentation on the conidial cell surface | <b>prot_ID_189</b>     | <b>An09g05730</b> | ECS |
| An09g05740        | -1             | 181           |            | Protein of unknown function                                                                                                                                                                                                                  | prot_ID_608            | An09g05740        |     |
| An09g05750        | -2             | 77            |            | Protein of unknown function                                                                                                                                                                                                                  | prot_ID_205            | An09g05750        |     |
| n/a               |                |               |            | Ortholog of <i>A. nidulans</i> FGSC A4 : AN12403, <i>A. fumigatus</i> Af293 : Afu5g03400, <i>A. oryzae</i> RIB40 : AO090102000549, <i>A. niger</i> ATCC 1015 : 50062-mRNA and <i>A. versicolor</i> : Aspve1_0047187                          | prot_ID_15             | An09g05760        |     |
| n/a               |                |               |            | Domain(s) with predicted manganese ion binding, pyrophosphatase activity and cytoplasm localization                                                                                                                                          | prot_ID_111            | An09g05770        |     |
| n/a               |                |               |            | Domain(s) with predicted catalytic activity, pyridoxal phosphate binding activity and role in metabolic process                                                                                                                              | prot_ID_184            | An09g05780        |     |

|     |                                                                                                                                                                                   |             |            |
|-----|-----------------------------------------------------------------------------------------------------------------------------------------------------------------------------------|-------------|------------|
| n/a |                                                                                                                                                                                   | prot_ID_617 | An09g05790 |
|     | Domain(s) with predicted DNA binding, oxidoreductase activity, acting on paired donors, with incorporation or reduction of molecular oxygen and 2-oxoglutarate as one donor, more |             |            |
| n/a |                                                                                                                                                                                   | prot_ID_93  | An09g05800 |
| n/a |                                                                                                                                                                                   | prot_ID_388 | An09g05810 |

## An10g00140 cluster

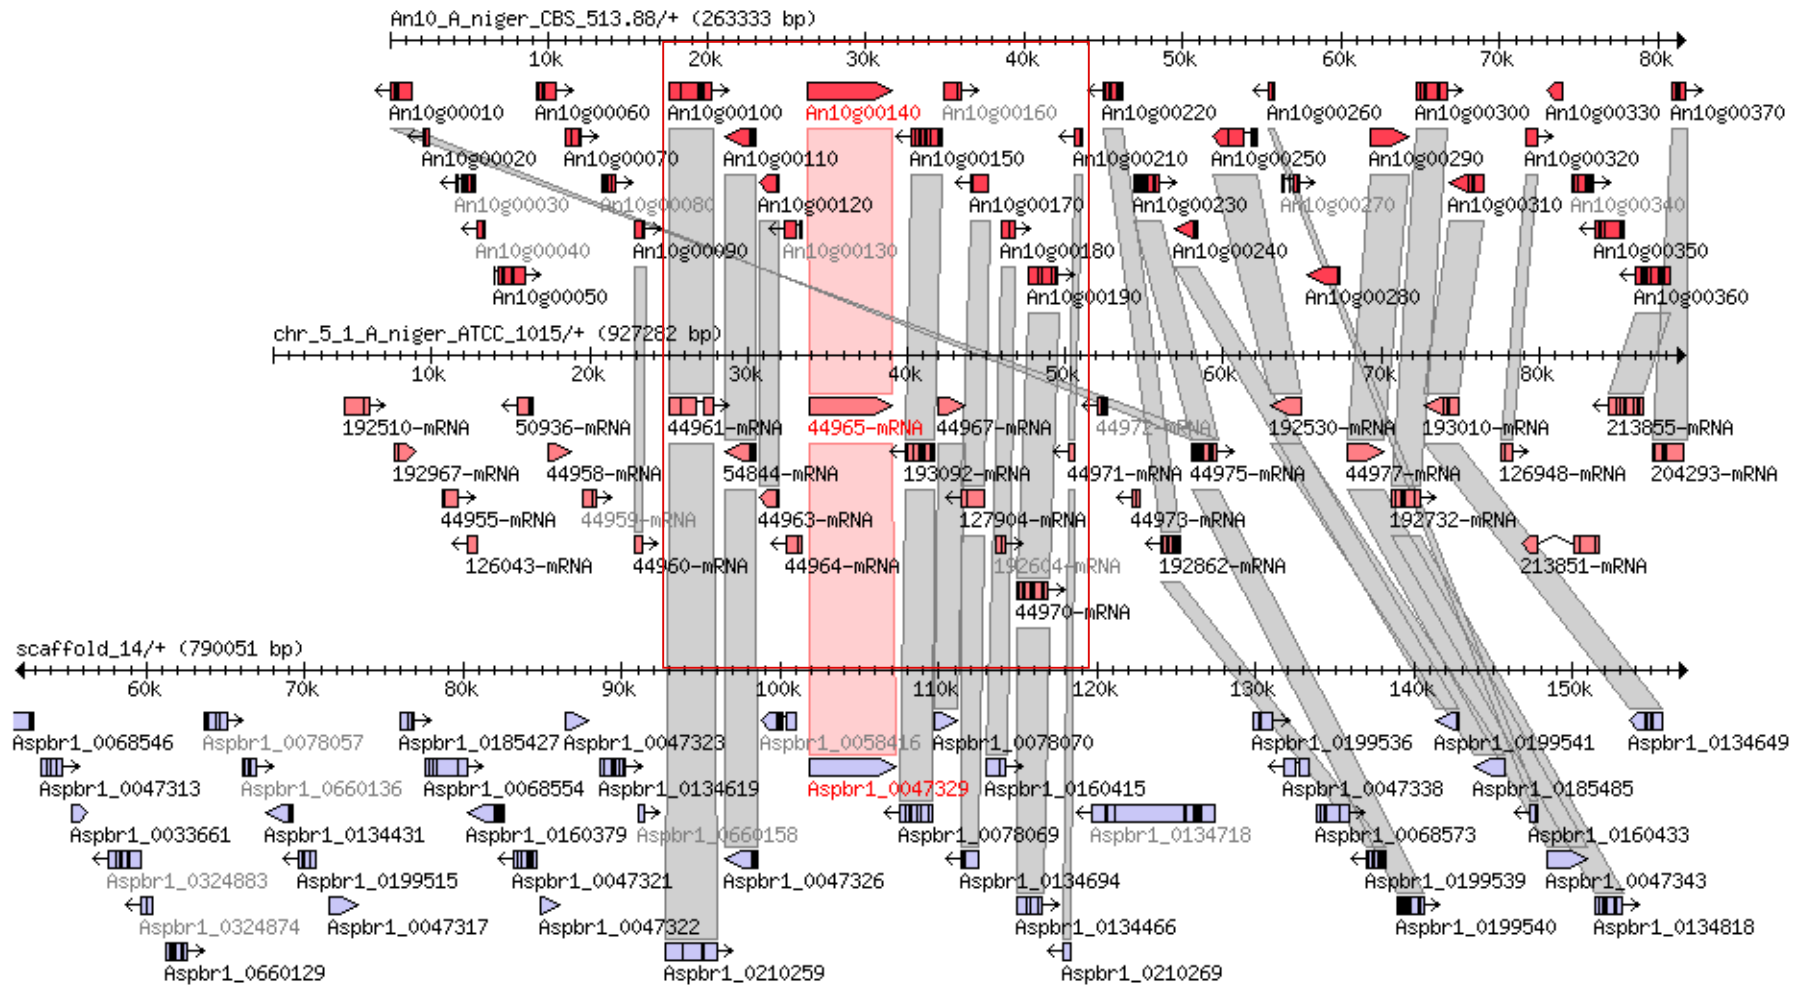

**An10g00140 cluster**

| Gene id (SMURF)   | Gene positions | Gene distance | AspGD name | AspGD description line or supplemental annotation                                                                                                                                                                                                                                                                                                                                                                                                         | protein ID (antiSMASH) | AspGD ID          |     |
|-------------------|----------------|---------------|------------|-----------------------------------------------------------------------------------------------------------------------------------------------------------------------------------------------------------------------------------------------------------------------------------------------------------------------------------------------------------------------------------------------------------------------------------------------------------|------------------------|-------------------|-----|
| An10g00010        | 13             | 686           |            | Putative alcohol dehydrogenase (catalyzed by glycerol dehydrogenase II (NADP+))<br>Domain(s) with predicted channel activity, role in cation transport, hemolysis in other organism involved in symbiotic interaction, pore complex assembly and pore complex localization                                                                                                                                                                                | n/a                    | An10g00010        |     |
| An10g00020        | 12             | 1690          |            |                                                                                                                                                                                                                                                                                                                                                                                                                                                           | n/a                    | An10g00020        |     |
| An10g00030        | 11             | 120           |            | Domain(s) with predicted hydrolase activity                                                                                                                                                                                                                                                                                                                                                                                                               | n/a                    | An10g00030        |     |
| An10g00040        | 10             | 521           |            |                                                                                                                                                                                                                                                                                                                                                                                                                                                           | n/a                    | An10g00040        |     |
| An10g00050        | 9              | 795           |            | Domain(s) with predicted role in transmembrane transport and integral to membrane localization                                                                                                                                                                                                                                                                                                                                                            | prot_ID_81             | An10g00050        |     |
| An10g00060        | 8              | 487           |            | Domain(s) with predicted sequence-specific DNA binding RNA polymerase II transcription factor activity, sequence-specific DNA binding transcription factor activity, zinc ion binding activity<br>Ortholog(s) have flavin adenine dinucleotide binding activity and role in cellular response to mycotoxin, gliotoxin biosynthetic process                                                                                                                | prot_ID_31             | An10g00060        |     |
| An10g00070        | 7              | 1114          |            |                                                                                                                                                                                                                                                                                                                                                                                                                                                           | prot_ID_71             | An10g00070        |     |
| An10g00080        | 6              | 1025          |            |                                                                                                                                                                                                                                                                                                                                                                                                                                                           | prot_ID_78             | An10g00080        |     |
| An10g00090        | 5              | 1501          |            | Ortholog of A. acidus : Aspfo1_0051750 and A. niger ATCC 1015 : 44960-mRNA                                                                                                                                                                                                                                                                                                                                                                                | prot_ID_62             | An10g00090        |     |
| An10g00100        | 4              | 845           |            | Domain(s) with predicted DNA binding, sequence-specific DNA binding RNA polymerase II transcription factor activity, sequence-specific DNA binding transcription factor activity, zinc ion binding activity<br>Domain(s) with predicted electron carrier activity, heme binding, iron ion binding, oxidoreductase activity, acting on paired donors, with incorporation or reduction of molecular oxygen activity and role in oxidation-reduction process | prot_ID_54             | An10g00100        | ECS |
| An10g00110        | 3              | 295           |            | Domain(s) with predicted catalytic activity and role in metabolic process                                                                                                                                                                                                                                                                                                                                                                                 | prot_ID_84             | An10g00110        |     |
| An10g00120        | 2              | 467           |            | Domain(s) with predicted prenyltransferase activity and integral to membrane localization                                                                                                                                                                                                                                                                                                                                                                 | prot_ID_99             | An10g00120        |     |
| An10g00130        | 1              | 389           |            |                                                                                                                                                                                                                                                                                                                                                                                                                                                           | prot_ID_103            | An10g00130        |     |
| <b>An10g00140</b> | 0              | 0             |            | Putative polyketide synthase (PKS)<br>Domain(s) with predicted electron carrier activity, heme binding, iron ion binding, oxidoreductase activity, acting on paired donors, with incorporation or reduction of molecular oxygen activity and role in oxidation-reduction process                                                                                                                                                                          | <b>prot_ID_37</b>      | <b>An10g00140</b> |     |
| An10g00150        | -1             | 1228          |            |                                                                                                                                                                                                                                                                                                                                                                                                                                                           | prot_ID_10             | An10g00150        |     |



|            |    |      |                                                                                                                                                                                                                                  |            |            |     |
|------------|----|------|----------------------------------------------------------------------------------------------------------------------------------------------------------------------------------------------------------------------------------|------------|------------|-----|
| An10g00160 | -2 | 207  | Protein of unknown function                                                                                                                                                                                                      | prot_ID_45 | An10g00160 |     |
| An10g00170 | -3 | 574  | Domain(s) with predicted nucleotide binding, oxidoreductase activity and role in oxidation-reduction process                                                                                                                     | prot_ID_91 | An10g00170 |     |
| An10g00180 | -4 | 802  | Ortholog of <i>A. brasiliensis</i> : Aspbr1_0160415, <i>Aspergillus flavus</i> NRRL 3357 : AFL2T_04691, <i>A. clavatus</i> NRRL 1 : ACLA_093650 and <i>A. fumigatus</i> A1163 : AFUB_079730                                      | prot_ID_20 | An10g00180 |     |
| An10g00190 | -5 | 875  | Domain(s) with predicted UDP-N-acetylmuramate dehydrogenase activity, flavin adenine dinucleotide binding activity and role in oxidation-reduction process                                                                       | prot_ID_87 | An10g00190 |     |
| An10g00210 | -6 | 970  | Ortholog of <i>A. brasiliensis</i> : Aspbr1_0210269, <i>A. clavatus</i> NRRL 1 : ACLA_087630, <i>A. acidus</i> : Aspfo1_0211502, <i>Aspergillus terreus</i> NIH2624 : ATET_01621 and <i>A. niger</i> ATCC 1015 : 44971-mRNA      | prot_ID_44 | An10g00210 | ECS |
| An10g00220 | -7 | 1350 | Ortholog of <i>A. nidulans</i> FGSC A4 : AN9115, <i>A. oryzae</i> RIB40 : AO090010000382, <i>A. brasiliensis</i> : Aspbr1_0199539, <i>A. niger</i> ATCC 1015 : 192862-mRNA and <i>Aspergillus flavus</i> NRRL 3357 : AFL2T_11557 | prot_ID_29 | An10g00220 |     |
| An10g00230 | -8 | 714  | Putative formaldehyde dehydrogenase                                                                                                                                                                                              | prot_ID_7  | An10g00230 |     |
| n/a        |    |      | Ortholog of <i>A. niger</i> CBS 513.88 : An01g02040, <i>A. brasiliensis</i> : Aspbr1_0040504, Aspbr1_0199541, <i>A. acidus</i> : Aspfo1_0072680, Aspfo1_0144505 and <i>A. versicolor</i> : Aspve1_0087805                        | prot_ID_1  | An10g00240 |     |
| n/a        |    |      | ATP binding, two-component response regulator                                                                                                                                                                                    | n/a        | An10g00250 |     |

# An10g00630 cluster

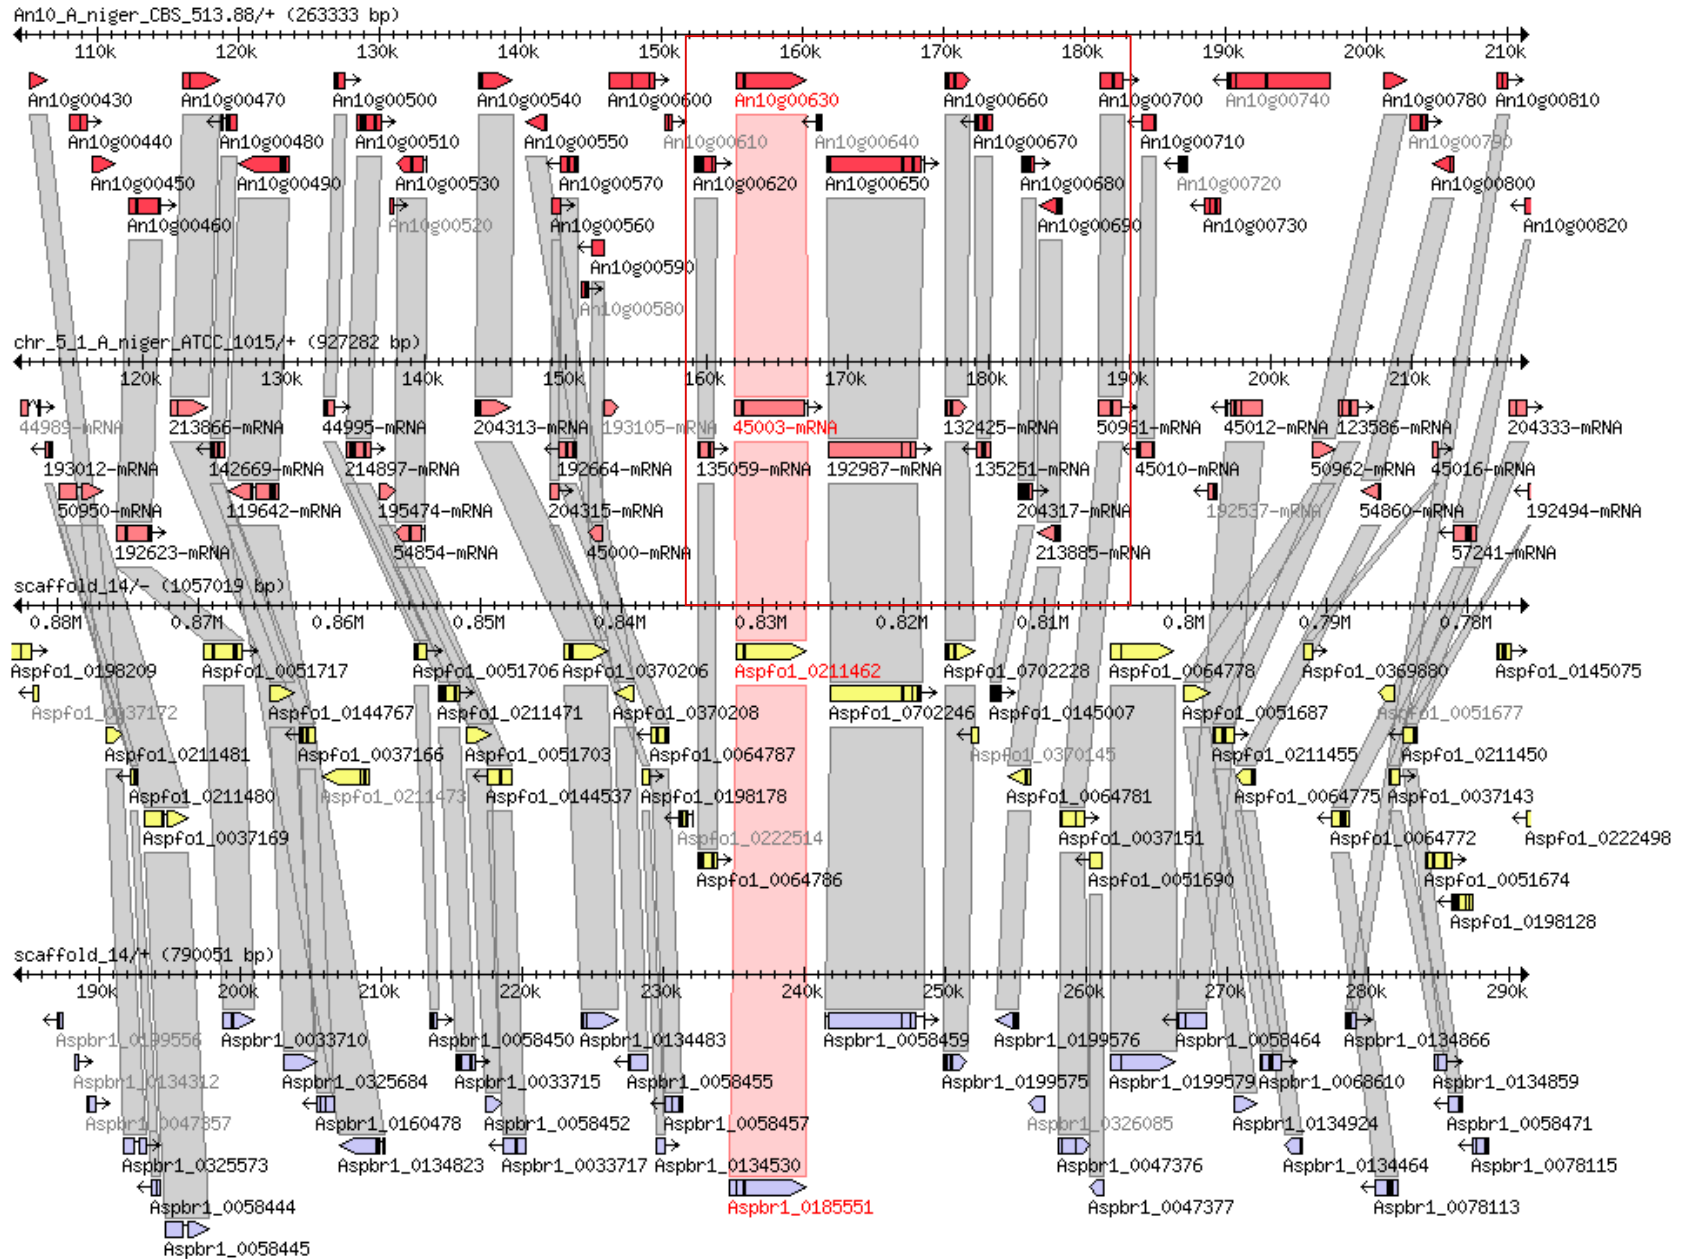

**An10g00630 cluster**

| Gene id (SMURF)   | Gene positions | Gene distance | AspGD name | AspGD description line or supplemental annotation                                                                                                                                                                                          | protein ID (antiSMASH) | AspGD ID          |     |
|-------------------|----------------|---------------|------------|--------------------------------------------------------------------------------------------------------------------------------------------------------------------------------------------------------------------------------------------|------------------------|-------------------|-----|
| An10g00540        | 9              | 906           |            | Domain(s) with predicted zinc ion binding activity                                                                                                                                                                                         | n/a                    | An10g00540        |     |
| An10g00550        | 8              | 691           |            | Ortholog of A. brasiliensis : Aspbr1_0058455 and A. acidus : Aspfo1_0370208                                                                                                                                                                | n/a                    | An10g00550        |     |
| An10g00560        | 7              | 53            |            | Ortholog of A. nidulans FGSC A4 : AN7635/binA, AN11904, A. fumigatus Af293 : Afu3g02216, Afu7g00610, Afu2g00967 and A. oryzae RIB40 : AO090009000537, AO090010000166, AO090701000353                                                       | n/a                    | An10g00560        |     |
| An10g00570        | 6              | 222           |            | Domain(s) with predicted nucleotide binding, oxidoreductase activity, zinc ion binding activity and role in oxidation-reduction process                                                                                                    | n/a                    | An10g00570        |     |
| An10g00580        | 5              | 182           |            |                                                                                                                                                                                                                                            | n/a                    | An10g00580        |     |
| An10g00590        | 4              | 458           |            | Ortholog of A. niger ATCC 1015 : 45000-mRNA                                                                                                                                                                                                | n/a                    | An10g00590        |     |
| An10g00600        | 3              | 789           |            | Domain(s) with predicted ADP binding, ATP binding, catalytic activity and role in apoptotic process, defense response, nucleoside metabolic process                                                                                        | n/a                    | An10g00600        |     |
| An10g00610        | 2              | 1616          |            |                                                                                                                                                                                                                                            | n/a                    | An10g00610        |     |
| An10g00620        | 1              | 1375          |            | Domain(s) with predicted branched-chain-amino-acid transaminase activity and role in branched-chain amino acid metabolic process                                                                                                           | n/a                    | An10g00620        | ECS |
| <b>An10g00630</b> | 0              | 0             |            | Domain(s) with predicted 3-oxoacyl-[acyl-carrier-protein] reductase (NADPH) activity, fatty-acyl-CoA synthase activity, nucleotide binding activity and role in fatty acid biosynthetic process, oxidation-reduction process               | n/a                    | <b>An10g00630</b> |     |
| An10g00640        | -1             | 684           |            | Protein of unknown function                                                                                                                                                                                                                | n/a                    | An10g00640        |     |
| An10g00650        | -2             | 442           |            | Domain(s) with predicted enoyl-[acyl-carrier-protein] reductase (NADH) activity, role in fatty acid biosynthetic process, oxidation-reduction process and fatty acid synthase complex localization                                         | n/a                    | An10g00650        |     |
| An10g00660        | -3             | 1474          |            | Domain(s) with predicted electron carrier activity, heme binding, iron ion binding, oxidoreductase activity, acting on paired donors, with incorporation or reduction of molecular oxygen activity and role in oxidation-reduction process | n/a                    | An10g00660        |     |
| An10g00670        | -4             | 369           |            | Ortholog(s) have trans-aconitate 3-methyltransferase activity and cytosol localization                                                                                                                                                     | n/a                    | An10g00670        |     |
| An10g00680        | -5             | 2056          |            | Domain(s) with predicted hydrogen ion transmembrane transporter activity, role in ATP hydrolysis coupled proton transport and proton-transporting V-type ATPase, V0                                                                        | n/a                    | An10g00680        |     |

domain localization

|            |    |      |                                                                                                |     |            |     |
|------------|----|------|------------------------------------------------------------------------------------------------|-----|------------|-----|
| An10g00690 | -6 | 292  | Domain(s) with predicted role in transmembrane transport and integral to membrane localization | n/a | An10g00690 |     |
| An10g00700 | -7 | 2638 | Domain(s) with predicted role in transmembrane transport and integral to membrane localization | n/a | An10g00700 | ECS |

## An11g00050 cluster

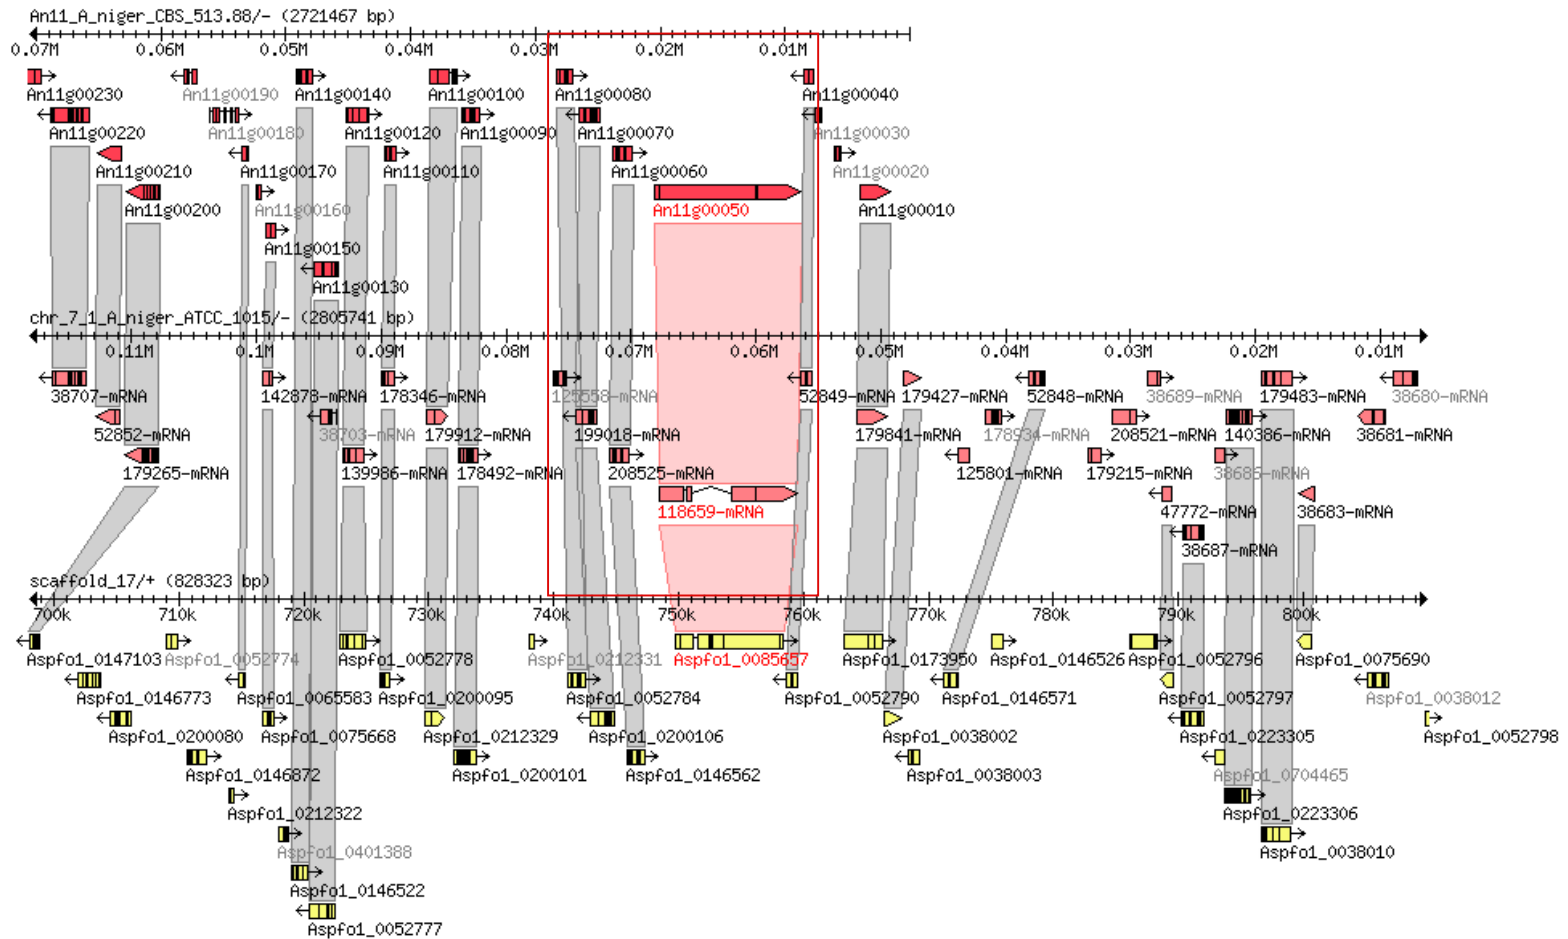

**An11g00050 cluster**

| Gene id (SMURF)   | Gene positions | Gene distance | AspGD name | AspGD description line or supplemental annotation                                                                                                                                                                                                                                                                                                                                                          | protein ID (antiSMASH) | AspGD ID          |     |
|-------------------|----------------|---------------|------------|------------------------------------------------------------------------------------------------------------------------------------------------------------------------------------------------------------------------------------------------------------------------------------------------------------------------------------------------------------------------------------------------------------|------------------------|-------------------|-----|
| n/a               |                |               |            | Domain(s) with predicted GTP binding, GTPase activity                                                                                                                                                                                                                                                                                                                                                      | prot_ID_121            | An11g00010        |     |
| n/a               |                |               |            |                                                                                                                                                                                                                                                                                                                                                                                                            | prot_ID_71             | An11g00020        |     |
| An11g00030        | 2              | 199           |            |                                                                                                                                                                                                                                                                                                                                                                                                            | prot_ID_799            | An11g00030        |     |
| An11g00040        | 1              | 392           |            | Ortholog of <i>A. nidulans</i> FGSC A4 : AN3008, <i>A. niger</i> CBS 513.88 : An15g05480, <i>A. oryzae</i> RIB40 : AO090011000565, <i>A. niger</i> ATCC 1015 : 52849-mRNA and <i>Aspergillus niger</i> ATCC 1015 : 46090-mRNA<br>Domain(s) with predicted ACP phosphopantetheine attachment site binding involved in fatty acid biosynthetic process, ligase activity, phosphopantetheine binding activity | prot_ID_996            | An11g00040        | ECS |
| <b>An11g00050</b> | 0              | 0             |            | Protein with similarity to integral membrane protein PTH11 of <i>Magnaporthe grisea</i>                                                                                                                                                                                                                                                                                                                    | <b>prot_ID_742</b>     | <b>An11g00050</b> |     |
| An11g00060        | -1             | 1892          |            | Domain(s) with predicted O-methyltransferase activity                                                                                                                                                                                                                                                                                                                                                      | prot_ID_1083           | An11g00060        |     |
| An11g00070        | -2             | 1097          |            | Ortholog of <i>A. brasiliensis</i> : Aspbr1_0189328, <i>A. acidus</i> : Aspfo1_0052784, <i>Aspergillus carbonarius</i> ITEM 5010 : Acar5010_163416 and <i>Aspergillus aculeatus</i> ATCC16872 : Aacu16872_048410                                                                                                                                                                                           | prot_ID_442            | An11g00070        |     |
| An11g00080        | -3             | 532           |            | Ortholog of <i>A. nidulans</i> FGSC A4 : AN5943, AN8548, AN8661, AN4642, <i>A. fumigatus</i> Af293 : Afu3g00850, Afu4g08850 and <i>A. niger</i> CBS 513.88 : An02g13470, An03g01430, An12g09260                                                                                                                                                                                                            | prot_ID_814            | An11g00080        | ECS |
| n/a               |                |               |            | Ortholog of <i>A. nidulans</i> FGSC A4 : AN5944, <i>A. oryzae</i> RIB40 : AO090009000720, <i>A. brasiliensis</i> : Aspbr1_0201333, <i>A. niger</i> ATCC 1015 : 179912-mRNA and <i>Aspergillus flavus</i> NRRL 3357 : AFL2T_10172                                                                                                                                                                           | prot_ID_183            | An11g00090        |     |
| n/a               |                |               |            |                                                                                                                                                                                                                                                                                                                                                                                                            | prot_ID_818            | An11g00100        |     |

## An11g00250 cluster

No ATCC 1015 orthologous cluster

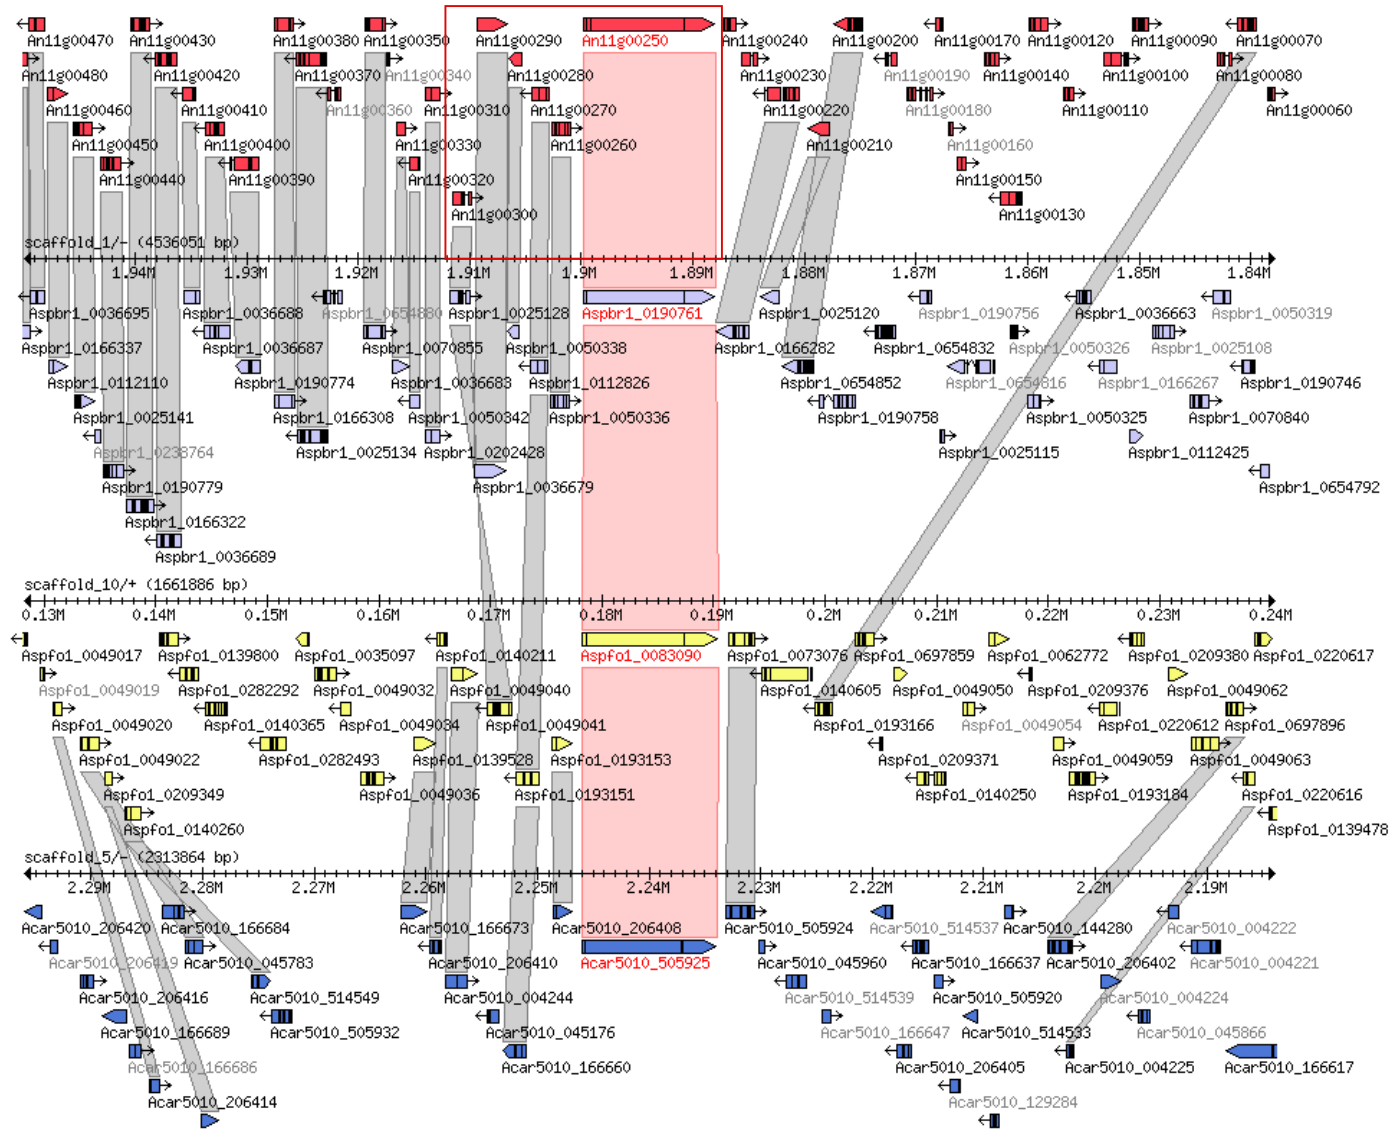

**An11g00250 cluster**

| Gene id (SMURF)   | Gene positions | Gene distance | AspGD name | AspGD description line or supplemental annotation                                                                                                                              | protein ID (antiSMASH) | AspGD ID              |
|-------------------|----------------|---------------|------------|--------------------------------------------------------------------------------------------------------------------------------------------------------------------------------|------------------------|-----------------------|
| An11g00130        | 12             | 116           |            | Ortholog of A. brasiliensis : Aspbr1_0189338, A. acidus : Aspfo1_0052777, A. sydowii : Aspsy1_0079960 and Aspergillus carbonarius ITEM 5010 : Acar5010_163398, Acar5010_208606 | n/a                    | An11g00130            |
| An11g00140        | 11             | 1617          |            | Domain(s) with predicted DNA binding, zinc ion binding activity, role in transcription, DNA-dependent and nucleus localization                                                 | n/a                    | An11g00140            |
| An11g00150        | 10             | 299           |            | Ortholog of A. brasiliensis : Aspbr1_0138759, A. acidus : Aspfo1_0075668, A. niger ATCC 1015 : 142878-mRNA and Aspergillus carbonarius ITEM 5010 : Acar5010_513321             | n/a                    | An11g00150            |
| An11g00160        | 9              | 556           |            |                                                                                                                                                                                | n/a                    | An11g00160            |
| An11g00170        | 8              | 295           |            | Ortholog of A. niger CBS 513.88 : An01g05460, A. brasiliensis : Aspbr1_0027926, Aspbr1_0070040, A. acidus : Aspfo1_0065583, Aspfo1_0123243 and A. versicolor : Aspve1_0067140  | prot_ID_652            | An11g00170            |
| An11g00180        | 7              | 947           |            |                                                                                                                                                                                | prot_ID_497            | An11g00180            |
| An11g00190        | 6              | 1976          |            | Domain(s) with predicted transmembrane transporter activity, role in transmembrane transport and integral to membrane localization                                             | prot_ID_518            | An11g00190            |
| An11g00200        | 5              | 472           |            | Putative beta-glucosidase precursor                                                                                                                                            | prot_ID_572            | An11g00200            |
| An11g00210        | 4              | 979           |            | Domain(s) with predicted N,N-dimethylaniline monooxygenase activity, NADP binding, flavin adenine dinucleotide binding activity and role in oxidation-reduction process        | prot_ID_681            | An11g00210            |
| An11g00220        | 3              | 604           |            | Ortholog(s) have ferric-chelate reductase activity and role in cellular iron ion homeostasis, cellular response to iron ion starvation                                         | prot_ID_840            | An11g00220            |
| An11g00230        | 2              | 606           |            | Domain(s) with predicted UDP-N-acetylmuramate dehydrogenase activity, flavin adenine dinucleotide binding activity and role in oxidation-reduction process                     | prot_ID_758            | An11g00230            |
| An11g00240        | 1              | 609           |            | Domain(s) with predicted nucleotide binding activity                                                                                                                           | prot_ID_388            | An11g00240            |
| <b>An11g00250</b> | 0              | 0             |            | <b>Putative polyketide synthase (PKS) - nonribosomal peptide synthase (NRPS) hybrid</b>                                                                                        | <b>prot_ID_993</b>     | <b>An11g00250</b> ECS |
| An11g00260        | -1             | 1201          |            | Domain(s) with predicted role in transmembrane transport and integral to membrane localization                                                                                 | prot_ID_549            | An11g00260            |
| An11g00270        | -2             | 263           |            | Protein similar to lanosterol 14 alpha-demethylase                                                                                                                             | prot_ID_682            | An11g00270            |
| An11g00280        | -3             | 957           |            | Domain(s) with predicted O-methyltransferase activity                                                                                                                          | prot_ID_281            | An11g00280            |



|            |     |      |                                                                                                                                                                                                             |             |            |     |
|------------|-----|------|-------------------------------------------------------------------------------------------------------------------------------------------------------------------------------------------------------------|-------------|------------|-----|
| An11g00290 | -4  | 210  | Putative polyketide synthase (PKS) - nonribosomal peptide synthase (NRPS) hybrid                                                                                                                            | prot_ID_124 | An11g00290 |     |
| An11g00300 | -5  | 522  | Domain(s) with predicted monooxygenase activity and role in oxidation-reduction process                                                                                                                     | prot_ID_866 | An11g00300 | ECS |
| An11g00310 | -6  | 1156 | Domain(s) with predicted aspartic-type endopeptidase activity and role in proteolysis                                                                                                                       | prot_ID_535 | An11g00310 |     |
| An11g00320 | -7  | 439  | Domain(s) with predicted hydrolase activity, acting on ester bonds activity and role in biosynthetic process                                                                                                | prot_ID_481 | An11g00320 |     |
| An11g00330 | -8  | 384  | Domain(s) with predicted nucleotide binding activity                                                                                                                                                        | prot_ID_5   | An11g00330 |     |
| An11g00340 | -9  | 514  | Questionable ORF                                                                                                                                                                                            | prot_ID_258 | An11g00340 |     |
| An11g00350 | -10 | 222  | Domain(s) with predicted UDP-N-acetylmuramate dehydrogenase activity, flavin adenine dinucleotide binding activity and role in oxidation-reduction process                                                  | prot_ID_748 | An11g00350 |     |
| An11g00360 | -11 | 2098 |                                                                                                                                                                                                             | n/a         | An11g00360 |     |
| An11g00370 | -12 | 52   | Domain(s) with predicted DNA binding, sequence-specific DNA binding RNA polymerase II transcription factor activity, sequence-specific DNA binding transcription factor activity, zinc ion binding activity | n/a         | An11g00370 |     |
| An11g00380 | -13 | 319  | Putative efflux pump                                                                                                                                                                                        | n/a         | An11g00380 |     |

# An11g03920 cluster

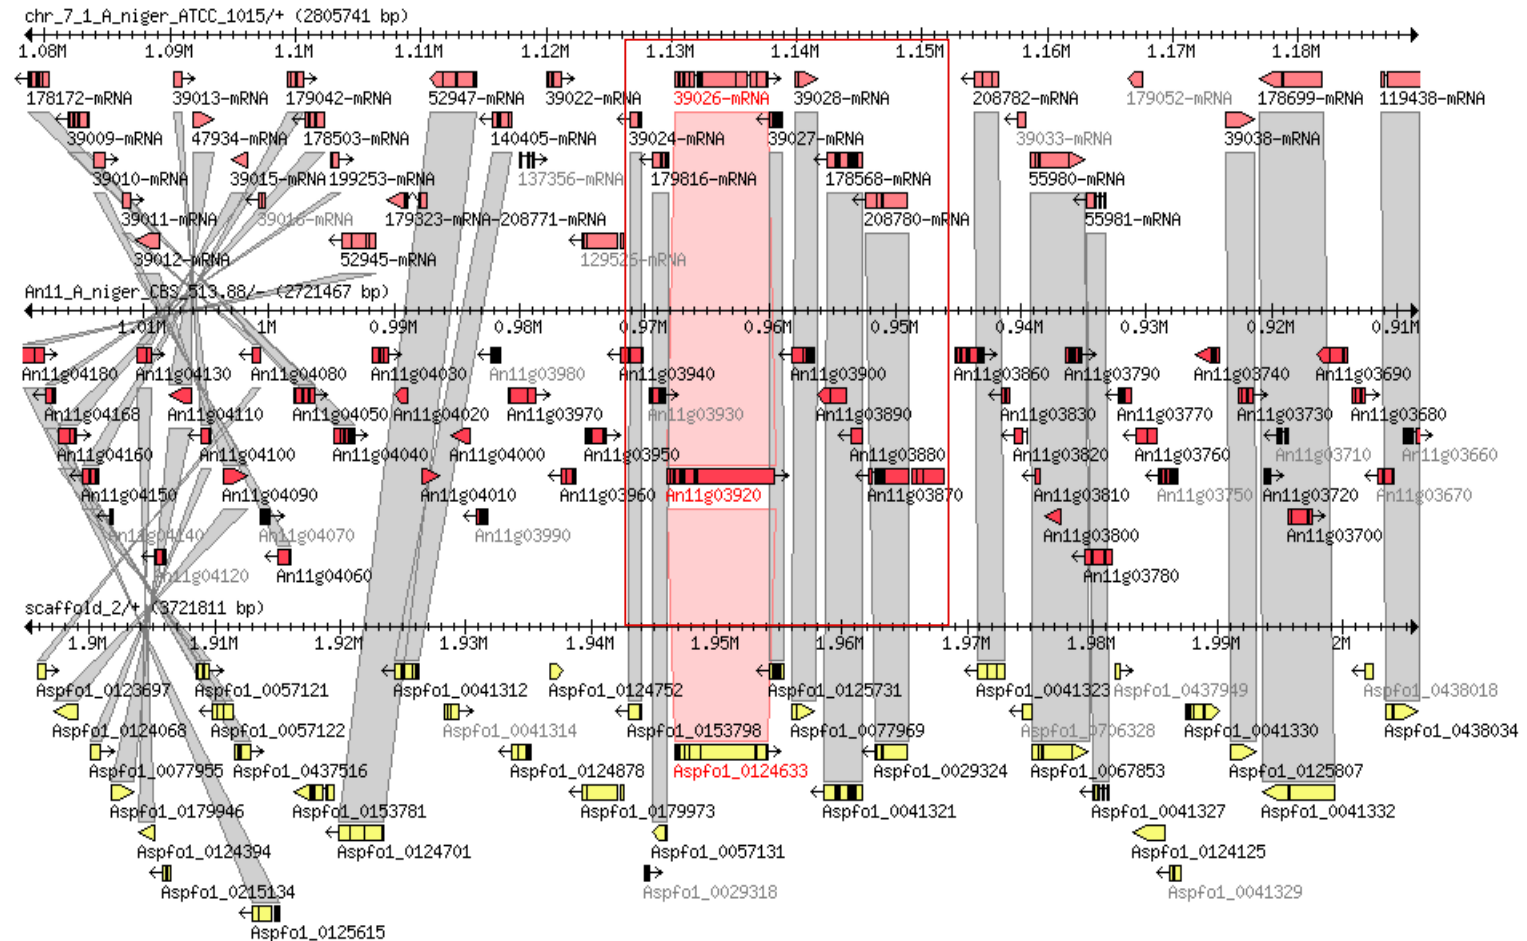

**An11g03920 cluster**

| Gene id (SMURF) | Gene positions | Gene distance | AspGD name | AspGD description line or supplemental annotation                                                                                                                                                                          | protein ID (antiSMASH) | AspGD ID   |     |
|-----------------|----------------|---------------|------------|----------------------------------------------------------------------------------------------------------------------------------------------------------------------------------------------------------------------------|------------------------|------------|-----|
| An11g03750      | 14             | 112           |            | Ortholog of <i>A. nidulans</i> FGSC A4 : AN1864, <i>A. fumigatus</i> Af293 : Afu2g04535, <i>A. oryzae</i> RIB40 : AO090003000246, <i>A. niger</i> ATCC 1015 : 52941-mRNA and <i>A. versicolor</i> : Aspve1_0050093         | n/a                    | An11g03750 |     |
| An11g03760      | 13             | 546           |            | Ortholog of <i>A. fumigatus</i> Af293 : Afu2g04533, <i>A. oryzae</i> RIB40 : AO090003000245, <i>A. niger</i> ATCC 1015 : 179547-mRNA, <i>A. versicolor</i> : Aspve1_0125145 and <i>A. sydowii</i> : Aspsy1_0140007         | n/a                    | An11g03760 |     |
| An11g03770      | 12             | 476           |            | Domain(s) with predicted DNA binding, sequence-specific DNA binding RNA polymerase II transcription factor activity, sequence-specific DNA binding transcription factor activity, zinc ion binding activity                | n/a                    | An11g03770 |     |
| An11g03780      | 11             | 119           |            | Ortholog of <i>A. nidulans</i> FGSC A4 : AN8471, <i>A. brasiliensis</i> : Aspbr1_0166950, <i>A. niger</i> ATCC 1015 : 179041-mRNA, <i>Aspergillus flavus</i> NRRL 3357 : AFL2T_04215 and <i>A. acidus</i> : Aspfo1_0057088 | n/a                    | An11g03780 |     |
| An11g03790      | 10             | 380           |            | Domain(s) with predicted monooxygenase activity and role in oxidation-reduction process                                                                                                                                    | n/a                    | An11g03790 |     |
| An11g03800      | 9              | 396           |            | Ortholog of <i>A. fumigatus</i> Af293 : Afu3g13620, <i>A. oryzae</i> RIB40 : AO090023000589, <i>A. niger</i> ATCC 1015 : 38979-mRNA and <i>A. versicolor</i> : Aspve1_0045600, Aspve1_0050055                              | n/a                    | An11g03810 |     |
| An11g03810      | 8              | 592           |            | Domain(s) with predicted FMN binding, riboflavin reductase (NADPH) activity and role in oxidation-reduction process                                                                                                        | prot_ID_374            | An11g03820 |     |
| An11g03820      | 7              | 401           |            | Ortholog of <i>A. nidulans</i> FGSC A4 : AN7883, AN4396, <i>A. brasiliensis</i> : Aspbr1_0113618, <i>A. niger</i> ATCC 1015 : 38981-mRNA and <i>A. acidus</i> : Aspfo1_0215105                                             | prot_ID_8              | An11g03830 |     |
| An11g03830      | 6              | 1360          |            | Domain(s) with predicted ATP binding, nucleoside-triphosphatase activity                                                                                                                                                   | prot_ID_272            | An11g03860 |     |
| An11g03860      | 5              | 714           |            | Ortholog of <i>A. brasiliensis</i> : Aspbr1_0025414, <i>A. acidus</i> : Aspfo1_0125007, <i>A. niger</i> ATCC 1015 : 38983-mRNA and <i>Aspergillus carbonarius</i> ITEM 5010 : Acar5010_204665                              | prot_ID_16             | An11g03870 | ECS |
| An11g03870      | 4              | 412           |            | Domain(s) with predicted lyase activity and role in metabolic process                                                                                                                                                      | prot_ID_594            | An11g03880 |     |
| An11g03880      | 3              | 376           |            | Domain(s) with predicted DNA binding, sequence-specific DNA binding RNA polymerase II transcription factor activity, sequence-specific DNA binding transcription factor activity, zinc ion binding activity                | prot_ID_135            | An11g03890 |     |
| An11g03890      | 2              | 277           |            |                                                                                                                                                                                                                            |                        |            |     |

|                   |     |      |      |                                                                                                                                                                                                                                                                                                                                                     |                    |                   |     |
|-------------------|-----|------|------|-----------------------------------------------------------------------------------------------------------------------------------------------------------------------------------------------------------------------------------------------------------------------------------------------------------------------------------------------------|--------------------|-------------------|-----|
| An11g03900        | 1   | 1208 |      | Domain(s) with predicted role in transmembrane transport and integral to membrane localization<br>Putative diketide synthase; ortholog(s) have role in asperuranone biosynthetic process, emericellamide biosynthetic process, monodictyphenone biosynthetic process, o-orsellinic acid biosynthetic process, sterigmatocystin biosynthetic process | prot_ID_341        | An11g03900        |     |
| <b>An11g03920</b> | 0   | 0    |      |                                                                                                                                                                                                                                                                                                                                                     | <b>prot_ID_187</b> | <b>An11g03920</b> |     |
| An11g03930        | -1  | 104  |      | Putative dihydrofolate reductase<br>Domain(s) with predicted electron carrier activity, heme binding, iron ion binding, oxidoreductase activity, acting on paired donors, with incorporation or reduction of molecular oxygen activity and role in oxidation-reduction process                                                                      | prot_ID_755        | An11g03930        |     |
| An11g03940        | -2  | 434  |      | Ortholog of A. nidulans FGSC A4 : AN8025, A. fumigatus Af293 : Afu1g01450, A. niger CBS 513.88 : An11g08050, An05g01890 and A. oryzae RIB40 : AO090010000064, AO090701000602                                                                                                                                                                        | prot_ID_274        | An11g03940        | ECS |
| An11g03950        | -3  | 1028 |      | Ortholog of A. nidulans FGSC A4 : AN6419, AN6946, AN5312, AN5664, AN8984, AN8971, AN9387, AN1317 and A. fumigatus Af293 : Afu5g13725                                                                                                                                                                                                                | prot_ID_709        | An11g03950        |     |
| An11g03960        | -4  | 728  |      | Domain(s) with predicted ATP binding, nucleoside-triphosphatase activity                                                                                                                                                                                                                                                                            | prot_ID_246        | An11g03960        |     |
| An11g03970        | -5  | 2281 |      |                                                                                                                                                                                                                                                                                                                                                     | prot_ID_482        | An11g03970        |     |
| An11g03980        | -6  | 744  |      |                                                                                                                                                                                                                                                                                                                                                     | prot_ID_791        | An11g03980        |     |
| An11g03990        | -7  | 251  |      |                                                                                                                                                                                                                                                                                                                                                     | prot_ID_887        | An11g03990        |     |
| An11g04000        | -8  | 458  |      | Domain(s) with predicted four-way junction helicase activity, nucleotide binding activity and role in DNA recombination, DNA repair<br>Domain(s) with predicted sequence-specific DNA binding<br>RNA polymerase II transcription factor activity, sequence-specific DNA binding transcription factor activity, zinc ion binding activity            | prot_ID_48         | An11g04000        |     |
| An11g04010        | -9  | 921  |      |                                                                                                                                                                                                                                                                                                                                                     | prot_ID_477        | An11g04010        |     |
| An11g04020        | -10 | 1228 |      | Domain(s) with predicted hydrolase activity and role in metabolic process                                                                                                                                                                                                                                                                           | n/a                | An11g04020        |     |
| An11g04030        | -11 | 452  | pelC | Putative pectin lyase, involved in degradation of pectins                                                                                                                                                                                                                                                                                           | n/a                | An11g04030        |     |
| An11g04040        | -12 | 1360 | pgxA | Putative exopolysaccharuronase A; predicted signal peptide secretion sequence                                                                                                                                                                                                                                                                       | n/a                | An11g04040        |     |

# An11g04280 cluster

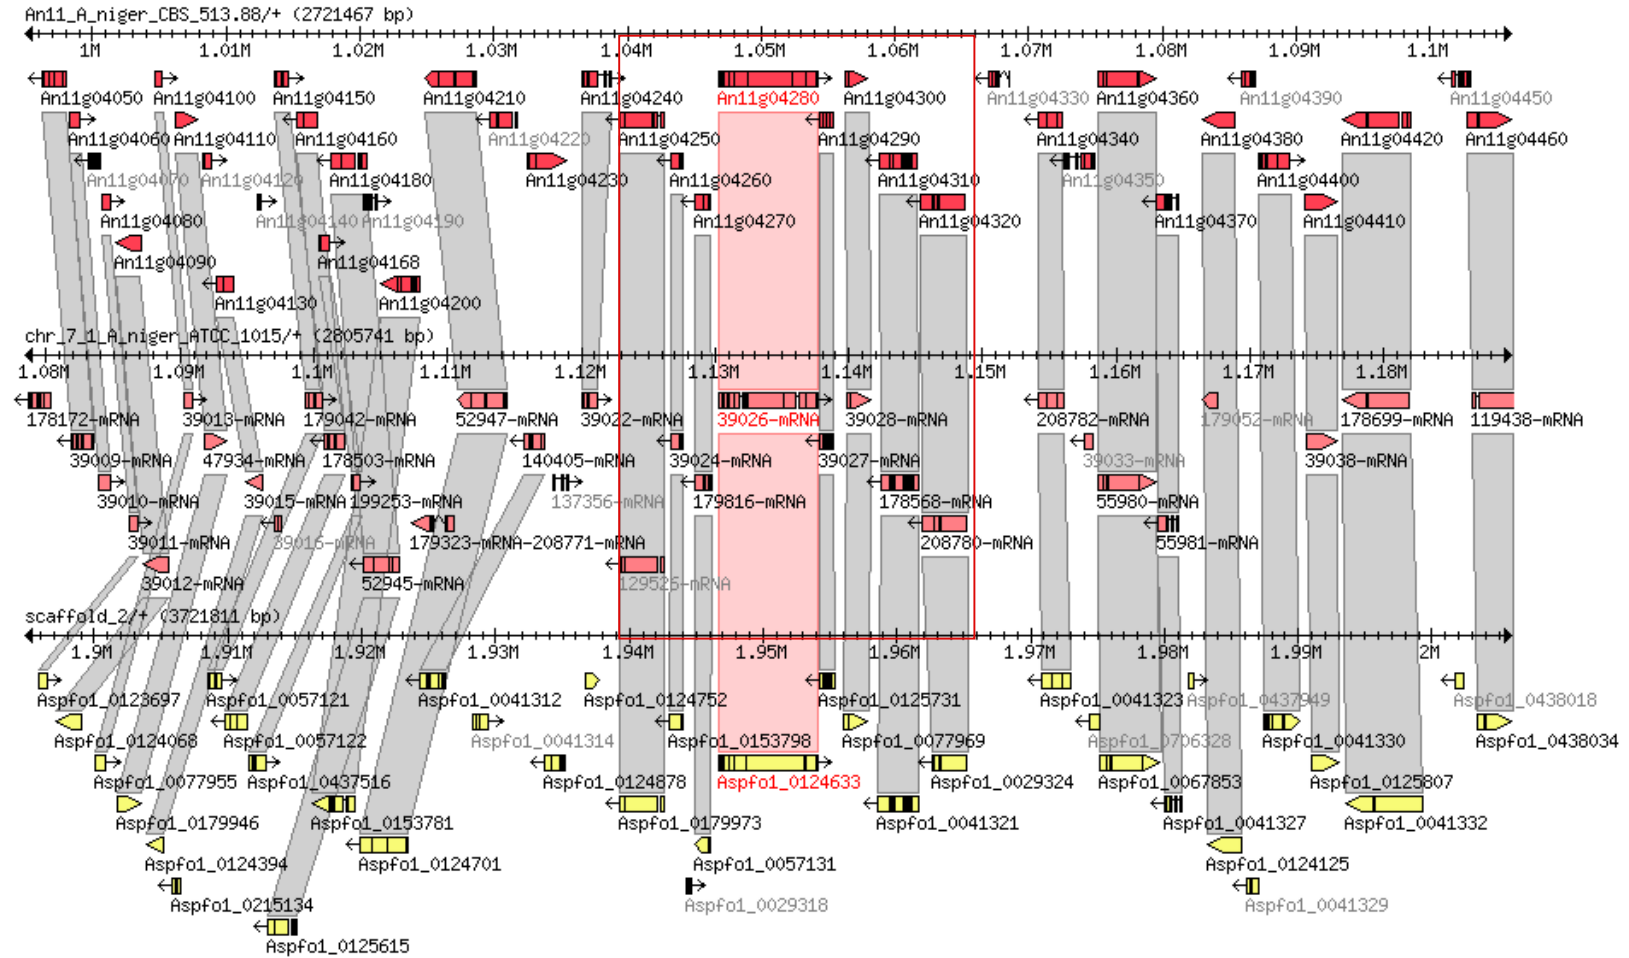

**An11g04280 cluster**

| Gene id (SMURF) | Gene positions | Gene distance | AspGD name | AspGD description line or supplemental annotation                                                                                                                                                                                          | protein ID (antiSMASH) | AspGD ID       |
|-----------------|----------------|---------------|------------|--------------------------------------------------------------------------------------------------------------------------------------------------------------------------------------------------------------------------------------------|------------------------|----------------|
| An11g04140      | 14             | 875           |            |                                                                                                                                                                                                                                            | n/a                    | An11g04140     |
| An11g04150      | 13             | 420           |            | Putative alcohol dehydrogenase                                                                                                                                                                                                             | n/a                    | An11g04150     |
| An11g04160      | 12             | 540           |            | Ortholog(s) have role in maltose metabolic process, regulation of transcription, DNA-dependent                                                                                                                                             | n/a                    | An11g04160     |
| An11g04168      | 11             | 288           |            | Ortholog of A. nidulans FGSC A4 : AN11862, A. fumigatus Af293 : Afu2g04610, A. oryzae RIB40 : AO090003000258, A. niger ATCC 1015 : 199253-mRNA and A. sydowii : Aspsy1_0026483                                                             | n/a                    | An11g04168     |
| An11g04180      | 10             | 11            | bipA       | DnaK-type molecular chaperone; ER chaperone; unfolded protein response (UPR) target gene; expression enhanced by maltose, by heat shock, DTT and by tunicamycin treatment                                                                  | prot_ID_569            | An11g04180     |
| An11g04190      | 9              | 293           |            |                                                                                                                                                                                                                                            | prot_ID_155            | An11g04190     |
| An11g04200      | 8              | 588           |            | Domain(s) with predicted GTP binding, GTPase activity                                                                                                                                                                                      | prot_ID_797            | An11g04200     |
| An11g04210      | 7              | 1079          |            | Domain(s) with predicted exonuclease activity, nucleic acid binding, ubiquitin thiolesterase activity, role in ubiquitin-dependent protein catabolic process and intracellular localization                                                | prot_ID_581            | An11g04210     |
| An11g04220      | 6              | 752           |            | Domain(s) with predicted electron carrier activity, heme binding, iron ion binding, oxidoreductase activity, acting on paired donors, with incorporation or reduction of molecular oxygen activity and role in oxidation-reduction process | prot_ID_168            | An11g04220     |
| An11g04230      | 5              | 1142          |            | Domain(s) with predicted nucleoside-triphosphatase activity, nucleotide binding activity                                                                                                                                                   | prot_ID_718            | An11g04230     |
| An11g04240      | 4              | 596           |            | Ortholog of A. nidulans FGSC A4 : AN8532, A. brasiliensis : Aspbr1_0071123, A. niger ATCC 1015 : 39022-mRNA and Aspergillus flavus NRRL 3357 : AFL2T_09181                                                                                 | prot_ID_204            | An11g04240     |
| An11g04250      | 3              | 493           |            | L-aminoadipatesemialdehyde dehydrogenase                                                                                                                                                                                                   | prot_ID_1077           | An11g04250 ECS |
| An11g04260      | 2              | 933           |            | Ortholog of A. nidulans FGSC A4 : AN11199, A. niger CBS 513.88 : An12g02720, A. niger ATCC 1015 : 39024-mRNA, A. versicolor : Aspve1_0053145 and A. sydowii : Aspsy1_0057345                                                               | prot_ID_485            | An11g04260     |
| An11g04270      | 1              | 576           |            | Domain(s) with predicted nucleotide binding, oxidoreductase activity, zinc ion binding activity and role in oxidation-reduction process                                                                                                    | prot_ID_284            | An11g04270     |

|                   |    |     |                                                                                                                                                                                                                                                         |                    |                   |     |
|-------------------|----|-----|---------------------------------------------------------------------------------------------------------------------------------------------------------------------------------------------------------------------------------------------------------|--------------------|-------------------|-----|
| <b>An11g04280</b> | 0  | 0   | Ortholog(s) have role in asperfuranone biosynthetic process, emericellamide biosynthetic process, monodictyphenone biosynthetic process, o-orsellinic acid biosynthetic process, sterigmatocystin biosynthetic process                                  | <b>prot_ID_424</b> | <b>An11g04280</b> |     |
| An11g04290        | -1 | 100 | Putative alcohol dehydrogenase<br>Ortholog of <i>A. brasiliensis</i> : Aspbr1_0167034, <i>N. fischeri</i> NRRL 181 : NFIA_108050, <i>A. clavatus</i> NRRL 1 : ACLA_047510, <i>A. acidus</i> : Aspfo1_0077969 and <i>A. niger</i> ATCC 1015 : 39028-mRNA | prot_ID_331        | An11g04290        |     |
| An11g04300        | -2 | 900 | Domain(s) with predicted role in intracellular protein transport                                                                                                                                                                                        | prot_ID_998        | An11g04300        |     |
| An11g04310        | -3 | 885 | Domain(s) with predicted ATP binding, protein serine/threonine kinase activity, small GTPase regulator activity and role in actin polymerization or depolymerization, protein complex assembly, protein phosphorylation                                 | prot_ID_1078       | An11g04310        |     |
| n/a               |    |     |                                                                                                                                                                                                                                                         | prot_ID_62         | An11g04320        | ECS |
| n/a               |    |     |                                                                                                                                                                                                                                                         | prot_ID_1000       | An11g04330        |     |
| n/a               |    |     | Domain(s) with predicted nucleobase transmembrane transporter activity, role in nucleobase transport and membrane localization                                                                                                                          | prot_ID_641        | An11g04340        |     |
| n/a               |    |     |                                                                                                                                                                                                                                                         | prot_ID_552        | An11g04350        |     |

# An11g05500 cluster

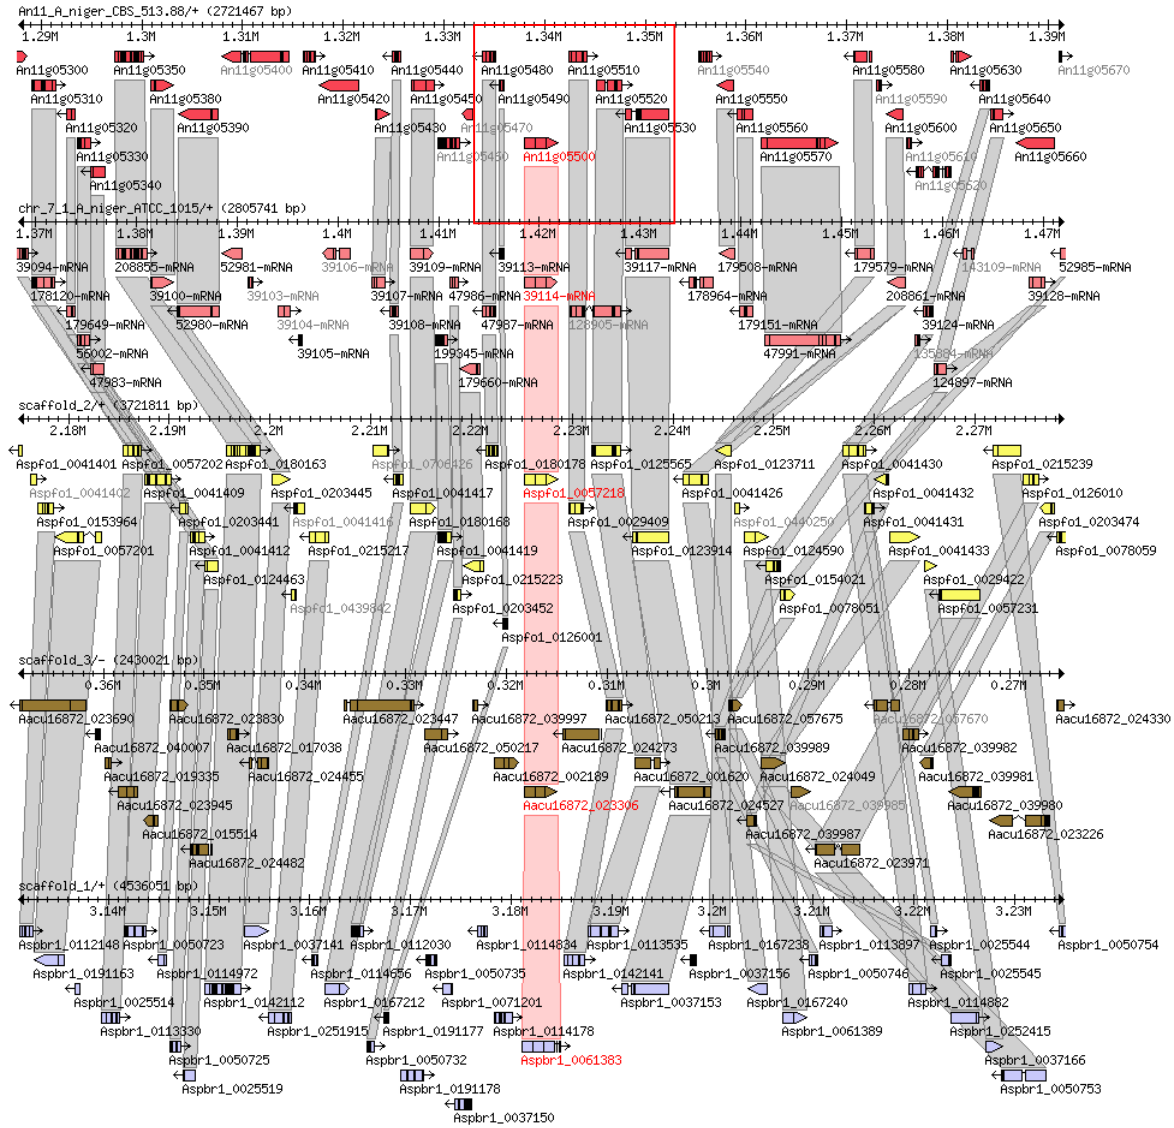



**An11g05500 cluster**

| Gene id (SMURF)   | Gene positions | Gene distance | AspGD name | AspGD description line or supplemental annotation                                                                                                                                                                                                     | protein ID (antiSMASH) | AspGD ID          |          |
|-------------------|----------------|---------------|------------|-------------------------------------------------------------------------------------------------------------------------------------------------------------------------------------------------------------------------------------------------------|------------------------|-------------------|----------|
| n/a               |                |               |            | Ortholog of <i>A. oryzae</i> RIB40 : AO090012000390, AO090009000464, <i>A. brasiliensis</i> : Aspbr1_0130524, <i>N. fischeri</i> NRRL 181 : NFIA_006040 and <i>Aspergillus flavus</i> NRRL 3357 : AFL2T_03297                                         | prot_ID_88             | An11g05420        |          |
| n/a               |                |               |            | Ortholog of <i>A. nidulans</i> FGSC A4 : AN6764, AN2660, AN7798, <i>A. fumigatus</i> Af293 : Afu8g01960 and <i>A. niger</i> CBS 513.88 : An15g04120, An01g12050, An11g03480, An01g01140                                                               | prot_ID_72             | An11g05430        |          |
| n/a               |                |               |            | Domain(s) with predicted hydrolase activity                                                                                                                                                                                                           | prot_ID_918            | An11g05440        |          |
| n/a               |                |               |            | Ortholog of <i>A. nidulans</i> FGSC A4 : AN10263, <i>A. oryzae</i> RIB40 : AO090023000304, <i>A. niger</i> ATCC 1015 : 39109-mRNA and <i>Aspergillus terreus</i> NIH2624 : ATET_05948                                                                 | prot_ID_928            | An11g05450        |          |
| n/a               |                |               |            | Domain(s) with predicted actin binding activity, role in actin cytoskeleton organization and F-actin capping protein complex localization                                                                                                             | prot_ID_647            | An11g05460        |          |
| An11g05470        | 3              | 994           |            | Protein of unknown function                                                                                                                                                                                                                           | prot_ID_503            | An11g05470        |          |
| An11g05480        | 2              | 411           |            | Domain(s) with predicted nucleotide binding activity<br>Ortholog of <i>A. brasiliensis</i> : Aspbr1_0191177, <i>A. acidus</i> : Aspfo1_0126001, <i>A. niger</i> ATCC 1015 : 39113-mRNA and <i>Aspergillus carbonarius</i> ITEM 5010 : Acar5010_002287 | prot_ID_401            | An11g05480        | ECS      |
| An11g05490        | 1              | 2080          |            |                                                                                                                                                                                                                                                       | prot_ID_705            | An11g05490        |          |
| <b>An11g05500</b> | 0              | 0             |            | <b>L-aminoadipatesemialdehyde dehydrogenase</b>                                                                                                                                                                                                       | <b>prot_ID_473</b>     | <b>An11g05500</b> |          |
| An11g05510        | -1             | 1267          |            | Domain(s) with predicted role in protein folding<br>Domain(s) with predicted ATP binding, protein serine/threonine kinase activity and role in protein phosphorylation<br>Domain(s) with predicted nucleic acid binding, zinc ion binding activity    | prot_ID_896            | An11g05510        |          |
| An11g05520        | -2             | 1001          |            |                                                                                                                                                                                                                                                       | prot_ID_39             | An11g05520        |          |
| An11g05530        | -3             | 1167          |            |                                                                                                                                                                                                                                                       | prot_ID_680            | An11g05530        | ECS, IGD |
| An11g05540        | -4             | 2833          |            |                                                                                                                                                                                                                                                       | prot_ID_817            | An11g05540        |          |
| An11g05550        | -5             | 450           |            | Domain(s) with predicted role in transmembrane transport and integral to membrane localization                                                                                                                                                        | prot_ID_739            | An11g05550        |          |
| An11g05560        | -6             | 388           |            | 8-Amino-7-oxononanoate synthase<br>Domain(s) with predicted ACP phosphopantetheine attachment site binding involved in fatty acid biosynthetic process, nucleotide binding, oxidoreductase activity and transferase activity, more                    | prot_ID_282            | An11g05560        |          |
| An11g05570        | -7             | 947           |            |                                                                                                                                                                                                                                                       | n/a                    | An11g05570        |          |

## An11g05570 cluster

No manual prediction made

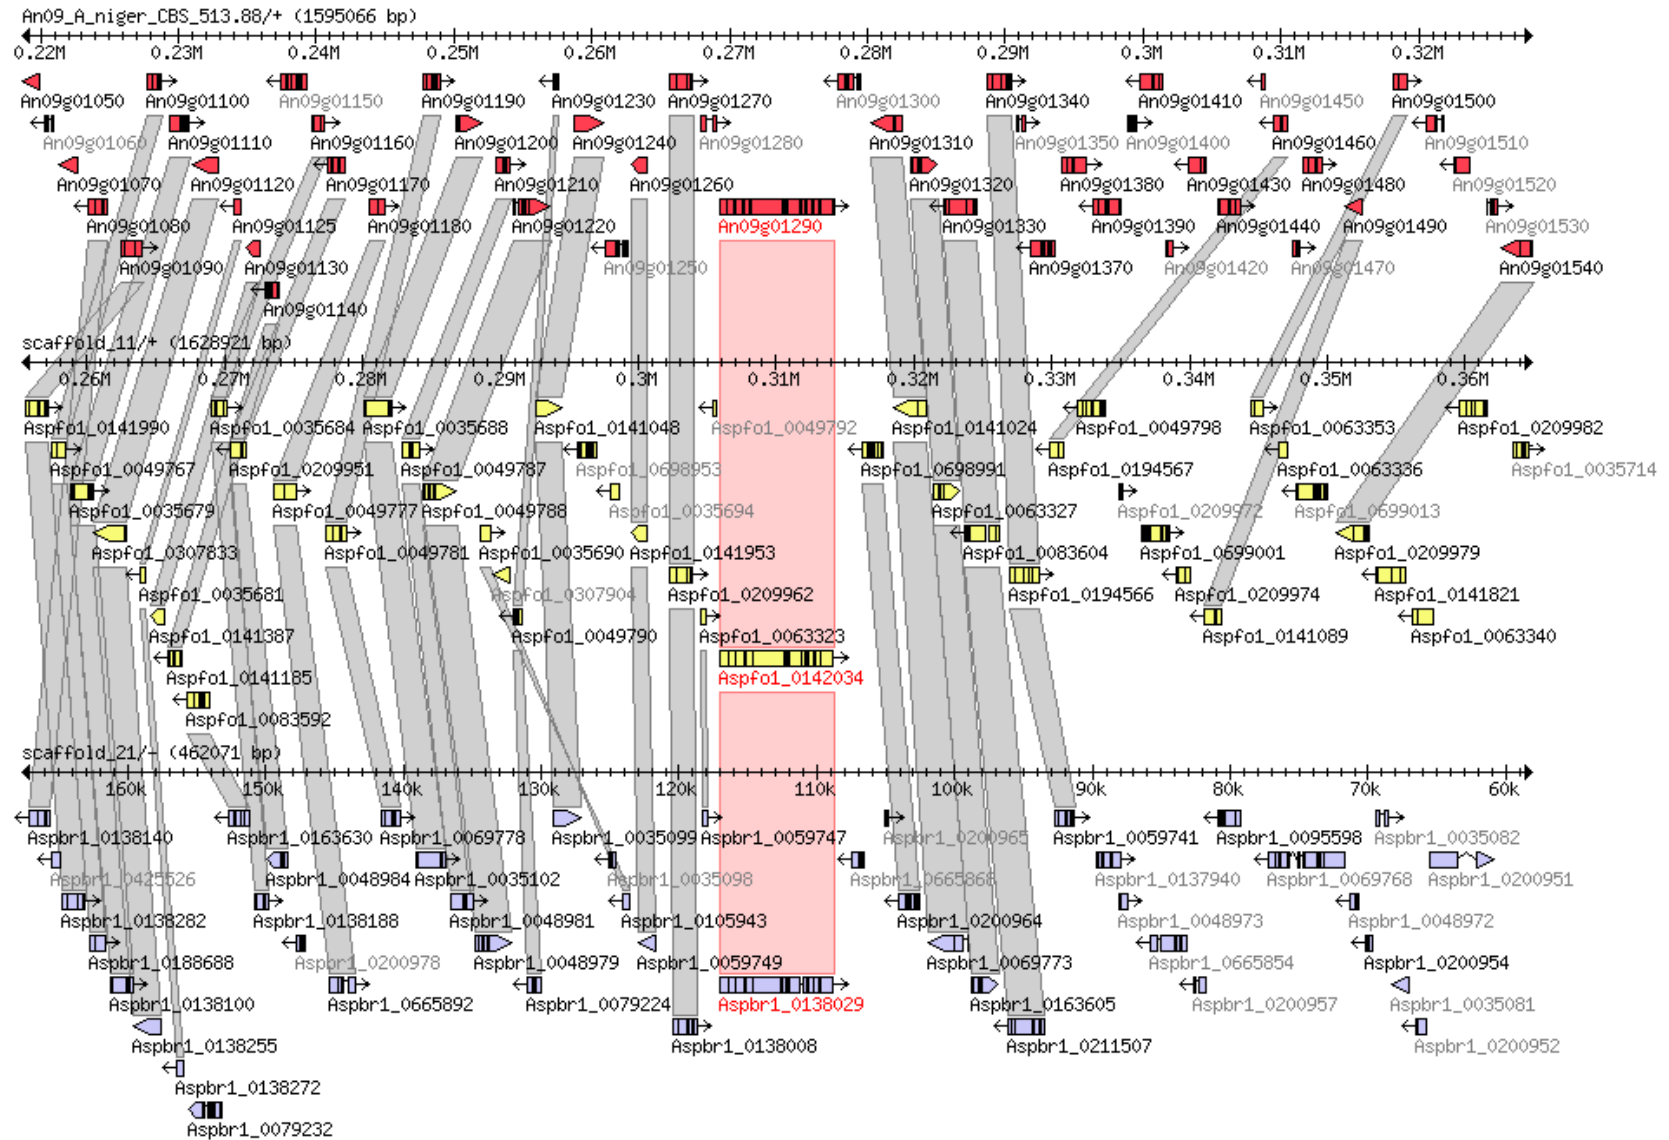

**An11g05570 cluster**

| Gene id (SMURF)   | Gene positions | Gene distance | AspGD name | AspGD description line or supplemental annotation                                                                                                                                               | protein ID (antiSMASH) | AspGD ID          |
|-------------------|----------------|---------------|------------|-------------------------------------------------------------------------------------------------------------------------------------------------------------------------------------------------|------------------------|-------------------|
| An11g05440        | 13             | 1190          |            | Domain(s) with predicted hydrolase activity                                                                                                                                                     | n/a                    | An11g05440        |
| An11g05450        | 12             | 418           |            | Ortholog of A. nidulans FGSC A4 : AN10263, A. oryzae RIB40 : AO090023000304, A. niger ATCC 1015 : 39109-mRNA and Aspergillus terreus NIH2624 : ATET_05948                                       | n/a                    | An11g05450        |
| An11g05460        | 11             | 108           |            | Domain(s) with predicted actin binding activity, role in actin cytoskeleton organization and F-actin capping protein complex localization                                                       | n/a                    | An11g05460        |
| An11g05470        | 10             | 994           |            |                                                                                                                                                                                                 | n/a                    | An11g05470        |
| An11g05480        | 9              | 411           |            | Domain(s) with predicted nucleotide binding activity                                                                                                                                            | n/a                    | An11g05480        |
| An11g05490        | 8              | 2080          |            | Ortholog of A. brasiliensis : Aspbr1_0191177, A. acidus : Aspfo1_0126001, A. niger ATCC 1015 : 39113-mRNA and Aspergillus carbonarius ITEM 5010 : Acar5010_002287                               | n/a                    | An11g05490        |
| An11g05500        | 7              | 1267          |            | L-aminoadipatesemialdehyde dehydrogenase                                                                                                                                                        | n/a                    |                   |
| An11g05510        | 6              | 1001          |            | Domain(s) with predicted role in protein folding                                                                                                                                                | prot_ID_896            | An11g05510        |
| An11g05520        | 5              | 1167          |            | Domain(s) with predicted ATP binding, protein serine/threonine kinase activity and role in protein phosphorylation                                                                              | prot_ID_39             | An11g05520        |
| An11g05530        | 4              | 2833          |            | Domain(s) with predicted nucleic acid binding, zinc ion binding activity                                                                                                                        | prot_ID_680            | An11g05530        |
| An11g05540        | 3              | 450           |            |                                                                                                                                                                                                 | prot_ID_817            | An11g05540        |
| An11g05550        | 2              | 388           |            | Domain(s) with predicted role in transmembrane transport and integral to membrane localization                                                                                                  | prot_ID_739            | An11g05550        |
| An11g05560        | 1              | 947           |            | 8-Amino-7-oxononanoate synthase                                                                                                                                                                 | prot_ID_282            | An11g05560        |
| <b>An11g05570</b> | 0              | 0             |            | Domain(s) with predicted ACP phosphopantetheine attachment site binding involved in fatty acid biosynthetic process, nucleotide binding, oxidoreductase activity and transferase activity, more | <b>prot_ID_143</b>     | <b>An11g05570</b> |
| An11g05580        | -1             | 1376          |            | Domain(s) with predicted choline dehydrogenase activity, flavin adenine dinucleotide binding activity and role in alcohol metabolic process, oxidation-reduction process                        | prot_ID_729            | An11g05580        |
| An11g05590        | -2             | 478           |            |                                                                                                                                                                                                 | prot_ID_690            | An11g05590        |
| n/a               |                |               |            | Domain(s) with predicted choline dehydrogenase activity, flavin adenine dinucleotide binding activity and role in alcohol metabolic process, oxidation-reduction process                        | prot_ID_56             | An11g05600        |
| n/a               |                |               |            |                                                                                                                                                                                                 | prot_ID_342            | An11g05610        |
| n/a               |                |               |            |                                                                                                                                                                                                 | prot_ID_94             | An11g05620        |

|     |                                                                                                                                                                                                                            |              |            |
|-----|----------------------------------------------------------------------------------------------------------------------------------------------------------------------------------------------------------------------------|--------------|------------|
| n/a | Ortholog of <i>A. clavatus</i> NRRL 1 : ACLA_044140                                                                                                                                                                        | prot_ID_1071 | An11g05630 |
| n/a | Domain(s) with predicted methyltransferase activity and role in 7-methylguanosine RNA capping, RNA methylation                                                                                                             | prot_ID_966  | An11g05640 |
| n/a | Ortholog of <i>A. fumigatus</i> Af293 : Afu6g08620, <i>A. oryzae</i> RIB40 : AO090001000523, <i>A. versicolor</i> : Aspve1_0132571, <i>A. sydowii</i> : Aspsy1_0149010 and <i>Aspergillus terreus</i> NIH2624 : ATET_06603 | prot_ID_478  | An11g05650 |
| n/a | Ortholog of <i>A. nidulans</i> FGSC A4 : AN9003, <i>A. versicolor</i> : Aspve1_0104265 and <i>A. sydowii</i> : Aspsy1_0093599                                                                                              | prot_ID_35   | An11g05660 |

## An11g05940/ An11g05960 cluster

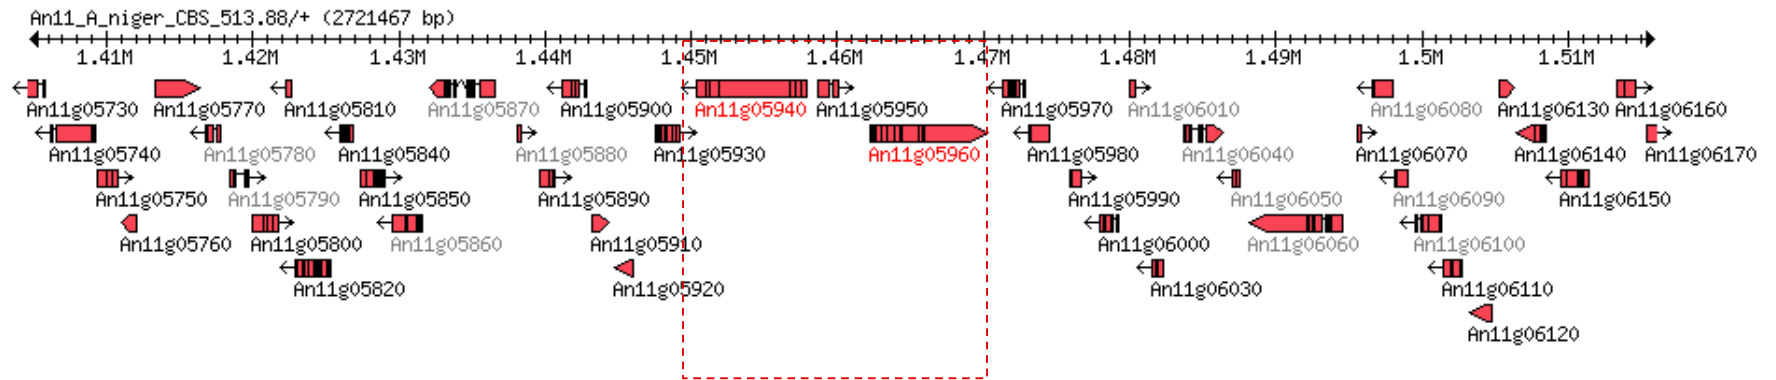

**An11g05940/ An11g05960 cluster**

| Gene id (SMURF)   | Gene positions | Gene distance | AspGD name | AspGD description line or supplemental annotation                                                                                                                                                                      | protein ID (antiSMASH) | AspGD ID              |
|-------------------|----------------|---------------|------------|------------------------------------------------------------------------------------------------------------------------------------------------------------------------------------------------------------------------|------------------------|-----------------------|
| An11g05820        | 11             | 705           |            | Domain(s) with predicted DNA binding, zinc ion binding activity, role in transcription, DNA-dependent and nucleus localization                                                                                         | n/a                    | An11g05820            |
| An11g05840        | 10             | 497           |            | Domain(s) with predicted nucleotide binding, oxidoreductase activity and role in oxidation-reduction process                                                                                                           | n/a                    | An11g05840            |
| An11g05850        | 9              | 446           |            | Domain(s) with predicted UDP-N-acetylmuramate dehydrogenase activity, flavin adenine dinucleotide binding activity and role in oxidation-reduction process                                                             | n/a                    | An11g05850            |
| An11g05860        | 8              | 491           |            | Domain(s) with predicted cation binding, hydrolase activity, hydrolyzing O-glycosyl compounds activity and role in carbohydrate metabolic process                                                                      | prot_ID_765            | An11g05860            |
| An11g05870        | 7              | 1501          |            |                                                                                                                                                                                                                        | prot_ID_674            | An11g05870            |
| An11g05880        | 6              | 1243          |            |                                                                                                                                                                                                                        | prot_ID_403            | An11g05880            |
| An11g05890        | 5              | 317           |            | Ortholog of <i>A. brasiliensis</i> : Aspbr1_0191213, <i>A. acidus</i> : Aspfo1_0029439 and <i>A. niger</i> ATCC 1015 : 39144-mRNA                                                                                      | prot_ID_470            | An11g05890            |
| An11g05900        | 4              | 445           |            | Ortholog of <i>A. fumigatus</i> Af293 : Afu3g02680, Afu8g01830, <i>A. niger</i> CBS 513.88 : An01g03400 and <i>A. oryzae</i> RIB40 : AO090102000007, AO090003000344, AO090001000755                                    | prot_ID_1027           | An11g05900            |
| An11g05910        | 3              | 400           |            | Domain(s) with predicted nucleotide binding, oxidoreductase activity, zinc ion binding activity and role in oxidation-reduction process                                                                                | prot_ID_173            | An11g05910            |
| An11g05920        | 2              | 1502          |            | Domain(s) with predicted hydrolase activity                                                                                                                                                                            | prot_ID_568            | An11g05920            |
| An11g05930        | 1              | 909           |            | Domain(s) with predicted role in transmembrane transport and integral to membrane localization                                                                                                                         | prot_ID_22             | An11g05930            |
| <b>An11g05940</b> | 0              | 0             |            | <b>Putative polyketide synthase (PKS)</b>                                                                                                                                                                              | <b>prot_ID_977</b>     | <b>An11g05940</b> ECS |
| An11g05950        | -1             | 752           |            | Ortholog of <i>A. acidus</i> : Aspfo1_0057351 and <i>Aspergillus terreus</i> NIH2624 : ATET_07281                                                                                                                      | prot_ID_888            | An11g05950            |
| An11g05960        | -2             | 2140          |            | Ortholog(s) have role in asperfuranone biosynthetic process, emericellamide biosynthetic process, monodictyphenone biosynthetic process, o-orsellinic acid biosynthetic process, sterigmatocystin biosynthetic process | prot_ID_1052           | An11g05960 ECS        |
| n/a               |                |               |            | Domain(s) with predicted role in cell wall macromolecule catabolic process                                                                                                                                             | prot_ID_1062           | An11g05970            |

|     |                                                                                                                                                                                                                     |             |            |
|-----|---------------------------------------------------------------------------------------------------------------------------------------------------------------------------------------------------------------------|-------------|------------|
| n/a | Ortholog of <i>A. fumigatus</i> Af293 : Afu6g09800, <i>A. brasiliensis</i> : Aspbr1_0167299, <i>N. fischeri</i> NRRL 181 : NFIA_069810, <i>A. acidus</i> : Aspfo1_0041459 and <i>A. versicolor</i> : Aspve1_0656122 | prot_ID_812 | An11g05980 |
| n/a | Ortholog of <i>A. brasiliensis</i> : Aspbr1_0199302, <i>A. acidus</i> : Aspfo1_0049693, Aspfo1_0125316, <i>A. versicolor</i> : Aspve1_0089146 and <i>A. sydowii</i> : Aspsy1_0050561                                | prot_ID_810 | An11g05990 |
| n/a | Domain(s) with predicted ATP binding, protein kinase activity and role in protein phosphorylation                                                                                                                   | prot_ID_609 | An11g06000 |
| n/a |                                                                                                                                                                                                                     | prot_ID_44  | An11g06010 |
| n/a | Ortholog of <i>A. niger</i> ATCC 1015 : 39155-mRNA and <i>Aspergillus aculeatus</i> ATCC16872 : Aacu16872_054439                                                                                                    | prot_ID_773 | An11g06030 |
| n/a | Domain(s) with predicted phosphotransferase activity, alcohol group as acceptor activity                                                                                                                            | prot_ID_677 | An11g06040 |
| n/a |                                                                                                                                                                                                                     | prot_ID_953 | An11g06050 |
| n/a |                                                                                                                                                                                                                     | prot_ID_613 | An11g06060 |

# An11g06460 cluster

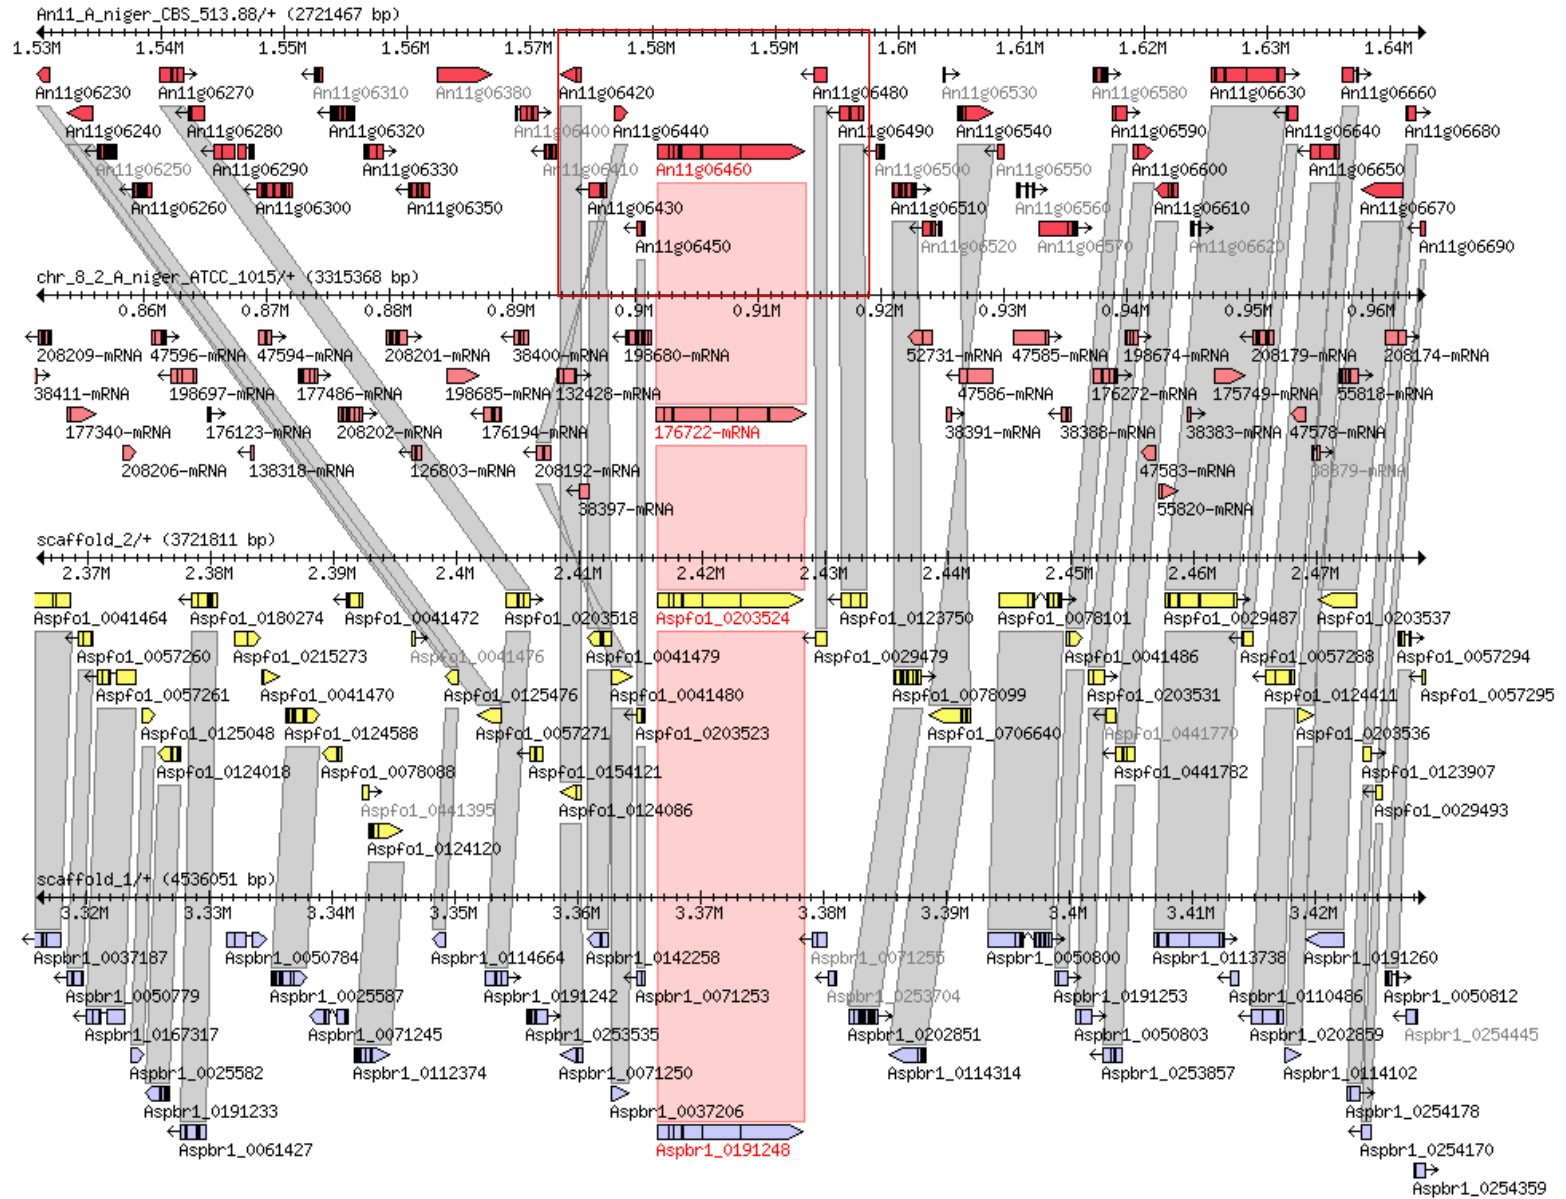



**An11g06460 cluster**

| Gene id (SMURF)   | Gene positions | Gene distance | AspGD name | AspGD description line or supplemental annotation                                                                                                                                                                                                                                                             | protein ID (antiSMASH) | AspGD ID          |     |
|-------------------|----------------|---------------|------------|---------------------------------------------------------------------------------------------------------------------------------------------------------------------------------------------------------------------------------------------------------------------------------------------------------------|------------------------|-------------------|-----|
| n/a               |                |               |            | Putative acid protease                                                                                                                                                                                                                                                                                        | prot_ID_399            | An11g06350        |     |
| n/a               |                |               |            | Ortholog(s) have mitochondrion localization                                                                                                                                                                                                                                                                   | prot_ID_235            | An11g06380        |     |
| n/a               |                |               |            |                                                                                                                                                                                                                                                                                                               | prot_ID_573            | An11g06400        |     |
| n/a               |                |               |            |                                                                                                                                                                                                                                                                                                               | prot_ID_197            | An11g06410        |     |
| An11g06420        | 4              | 718           |            | Domain(s) with predicted role in transmembrane transport and integral to membrane localization<br>Ortholog of <i>A. niger</i> CBS 513.88 : An09g02320, <i>A. oryzae</i> RIB40 : AO090001000002, <i>A. brasiliensis</i> : Aspbr1_0062833, Aspbr1_0142258 and <i>Aspergillus flavus</i> NRRL 3357 : AFL2T_04900 | prot_ID_659            | An11g06420        | ECS |
| An11g06430        | 3              | 622           |            | Domain(s) with predicted nucleotide binding, oxidoreductase activity, zinc ion binding activity and role in oxidation-reduction process                                                                                                                                                                       | prot_ID_247            | An11g06430        |     |
| An11g06440        | 2              | 813           |            | Ortholog of <i>A. nidulans</i> FGSC A4 : AN1088, <i>A. fumigatus</i> Af293 : Afu4g14470, Afu8g00430, <i>A. niger</i> CBS 513.88 : An07g00070, An07g00010, An02g08300 and <i>A. oryzae</i> RIB40 : AO090001000323                                                                                              | prot_ID_592            | An11g06440        |     |
| An11g06450        | 1              | 1027          |            | Ortholog(s) have role in pseurotin A biosynthetic process                                                                                                                                                                                                                                                     | prot_ID_842            | An11g06450        |     |
| <b>An11g06460</b> | 0              | 0             |            | Ortholog of <i>A. acidus</i> : Aspfo1_0029479 and <i>A. niger</i> ATCC 1015 : 39189-mRNA                                                                                                                                                                                                                      | <b>prot_ID_449</b>     | <b>An11g06460</b> |     |
| An11g06480        | -1             | 730           |            | Ortholog of <i>A. niger</i> CBS 513.88 : An18g01440, <i>A. oryzae</i> RIB40 : AO090005000944, <i>A. versicolor</i> : Aspve1_0145746, <i>A. sydowii</i> : Aspsy1_0085817 and <i>Aspergillus terreus</i> NIH2624 : ATET_05225                                                                                   | prot_ID_308            | An11g06480        |     |
| An11g06490        | -2             | 1076          |            | Protein of unknown function                                                                                                                                                                                                                                                                                   | prot_ID_608            | An11g06490        | ECS |
| n/a               |                |               |            | Domain(s) with predicted N,N-dimethylaniline monooxygenase activity, NADP binding, flavin adenine dinucleotide binding activity and role in oxidation-reduction process                                                                                                                                       | prot_ID_321            | An11g06500        |     |
| n/a               |                |               |            | Protein of unknown function                                                                                                                                                                                                                                                                                   | prot_ID_217            | An11g06510        |     |
| n/a               |                |               |            | Putative retrotransposable element remnant                                                                                                                                                                                                                                                                    | prot_ID_949            | An11g06520        |     |
| n/a               |                |               |            | Beta-mannosidase; glycosyl hydrolase family 2; contains several putative N-glycosylation sites                                                                                                                                                                                                                | prot_ID_623            | An11g06530        |     |
| n/a               |                |               | mndA       |                                                                                                                                                                                                                                                                                                               | prot_ID_97             | An11g06540        |     |
| n/a               |                |               |            |                                                                                                                                                                                                                                                                                                               | prot_ID_639            | An11g06550        |     |
| n/a               |                |               |            |                                                                                                                                                                                                                                                                                                               | prot_ID_436            | An11g06560        |     |
| n/a               |                |               |            |                                                                                                                                                                                                                                                                                                               | prot_ID_139            | An11g06570        |     |

# An11g07310 cluster

No ATCC 1015 orthologous cluster

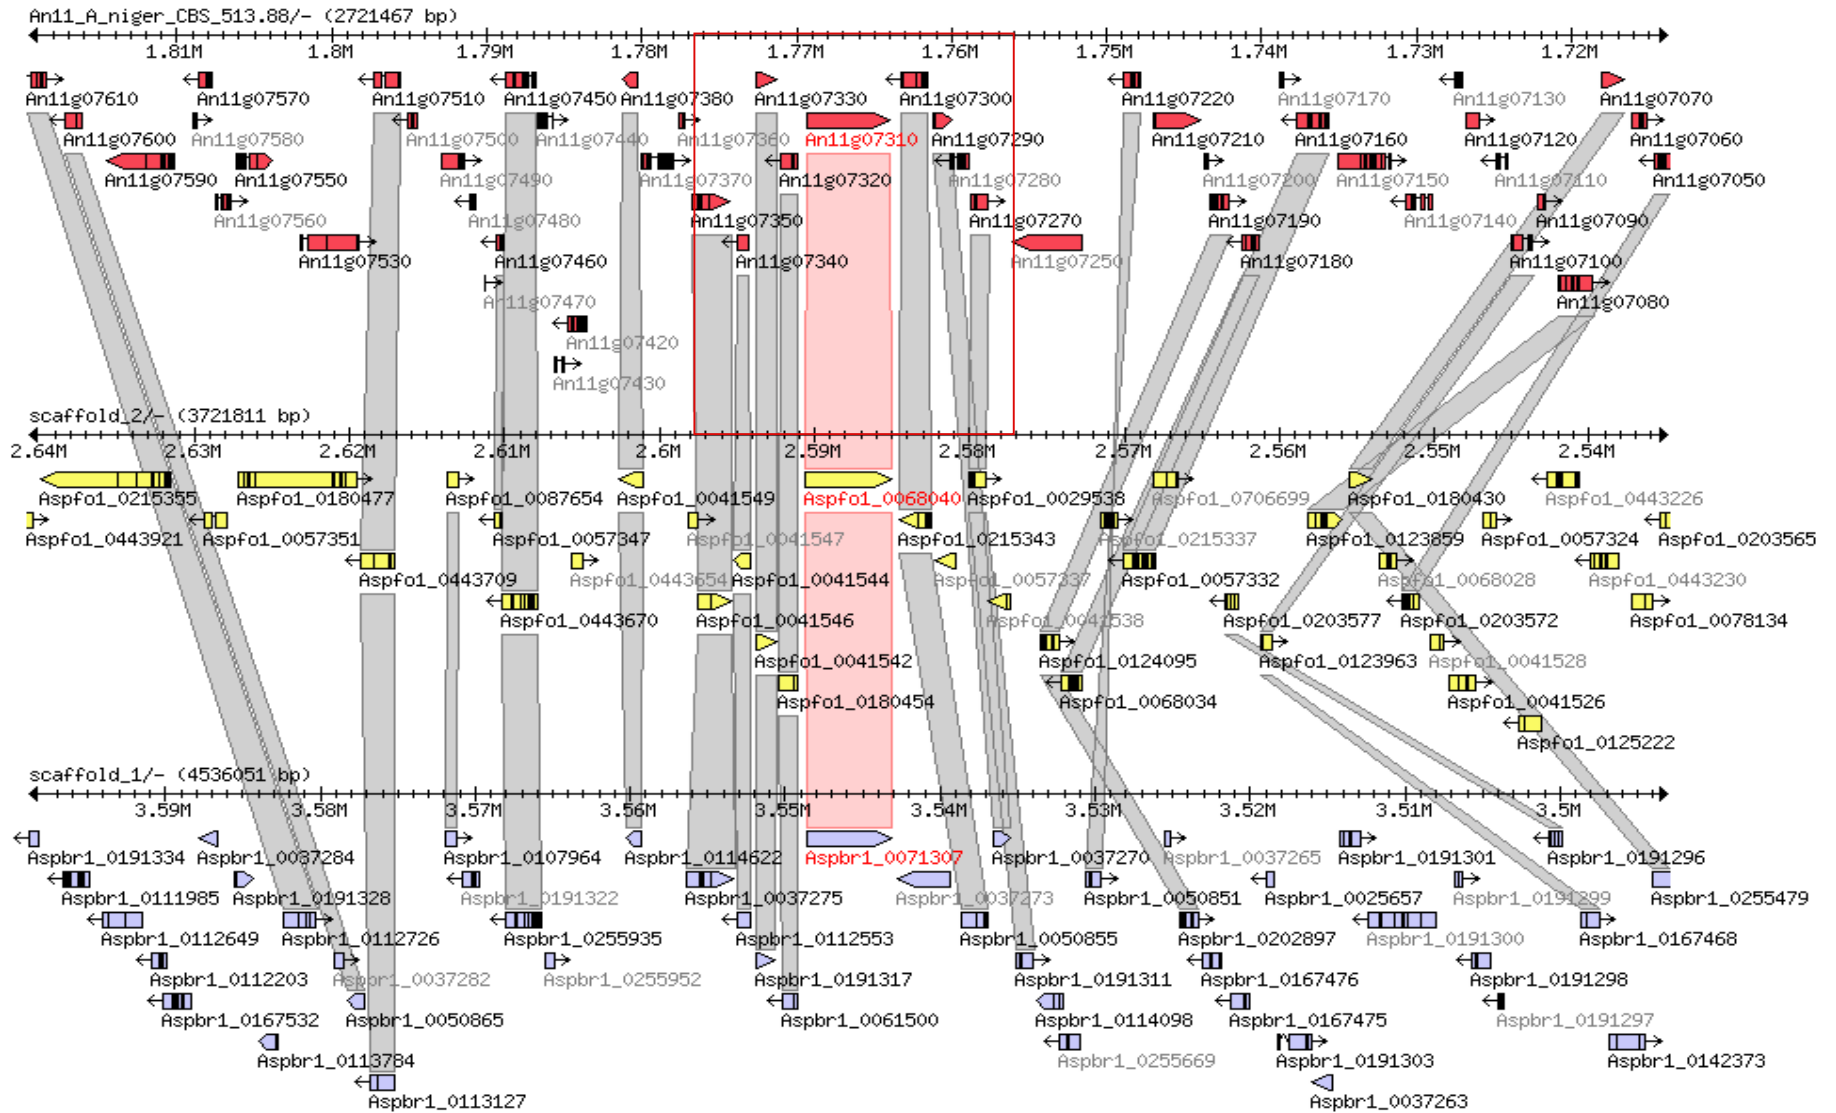

**An11g07310 cluster**

| Gene id (SMURF)   | Gene positions | Gene distance | AspGD name | AspGD description line or supplemental annotation                                                                                                                                                       | protein ID (antiSMASH) | AspGD ID          |     |
|-------------------|----------------|---------------|------------|---------------------------------------------------------------------------------------------------------------------------------------------------------------------------------------------------------|------------------------|-------------------|-----|
| n/a               |                |               |            | Putative ankyrin                                                                                                                                                                                        | prot_ID_1081           | An11g07210        |     |
| n/a               |                |               |            | Ortholog of A. nidulans FGSC A4 : AN2023, A. niger CBS 513.88 : An18g00750, An16g04060, A. oryzae RIB40 : AO090001000252, AO090701000624 and A. niger ATCC 1015 : 179170-mRNA, 187809-mRNA, 210569-mRNA | prot_ID_565            | An11g07220        |     |
| n/a               |                |               |            | Ortholog(s) have mitochondrion localization                                                                                                                                                             | prot_ID_166            | An11g07250        |     |
| n/a               |                |               |            | Domain(s) with predicted NAD binding, oxidoreductase activity, acting on the CH-OH group of donors, NAD or NADP as acceptor activity and role in oxidation-reduction process                            | prot_ID_644            | An11g07270        | ECS |
| An11g07280        | 3              | 117           |            | Transmembrane transporter                                                                                                                                                                               | prot_ID_614            | An11g07280        |     |
| An11g07290        | 2              | 597           |            | Domain(s) with predicted nucleotidyltransferase activity                                                                                                                                                | prot_ID_532            | An11g07290        |     |
| An11g07300        | 1              | 663           |            | Transmembrane transporter                                                                                                                                                                               | prot_ID_366            | An11g07300        |     |
| <b>An11g07310</b> | 0              | 0             |            | Polyketide synthase                                                                                                                                                                                     | <b>prot_ID_99</b>      | <b>An11g07310</b> |     |
| An11g07320        | -1             | 640           |            | Hydroxyacylglutathione hydrolase (glyoxylase II)                                                                                                                                                        | prot_ID_801            | An11g07320        |     |
| An11g07330        | -2             | 375           |            | Ortholog(s) have role in asperthecin biosynthetic process, secondary metabolite biosynthetic process                                                                                                    | prot_ID_511            | An11g07330        |     |
| An11g07340        | -3             | 467           |            | Protein similar to O-methyl transferases; expression repressed by tunicamycin and DTT                                                                                                                   | prot_ID_367            | An11g07340        |     |
| An11g07350        | -4             | 410           |            | Transcription factor                                                                                                                                                                                    | prot_ID_14             | An11g07350        | ECS |
| n/a               |                |               |            |                                                                                                                                                                                                         | prot_ID_563            | An11g07360        |     |
| n/a               |                |               |            |                                                                                                                                                                                                         | prot_ID_545            | An11g07370        |     |
| n/a               |                |               |            | Domain(s) with predicted catalytic activity and role in biosynthetic process                                                                                                                            | prot_ID_317            | An11g07380        |     |
| n/a               |                |               |            |                                                                                                                                                                                                         | prot_ID_738            | An11g07420        |     |
| n/a               |                |               |            |                                                                                                                                                                                                         | prot_ID_544            | An11g07430        |     |
| n/a               |                |               |            |                                                                                                                                                                                                         | prot_ID_848            | An11g07440        |     |
| n/a               |                |               |            | Domain(s) with predicted ATP binding, protein serine/threonine kinase activity and role in protein phosphorylation                                                                                      | prot_ID_806            | An11g07450        |     |
| n/a               |                |               |            | Ortholog of A. acidus : Aspfo1_0057347                                                                                                                                                                  | prot_ID_655            | An11g07460        |     |

# An11g09720 cluster

Not typical secondary metabolism annotations, no manual prediction made

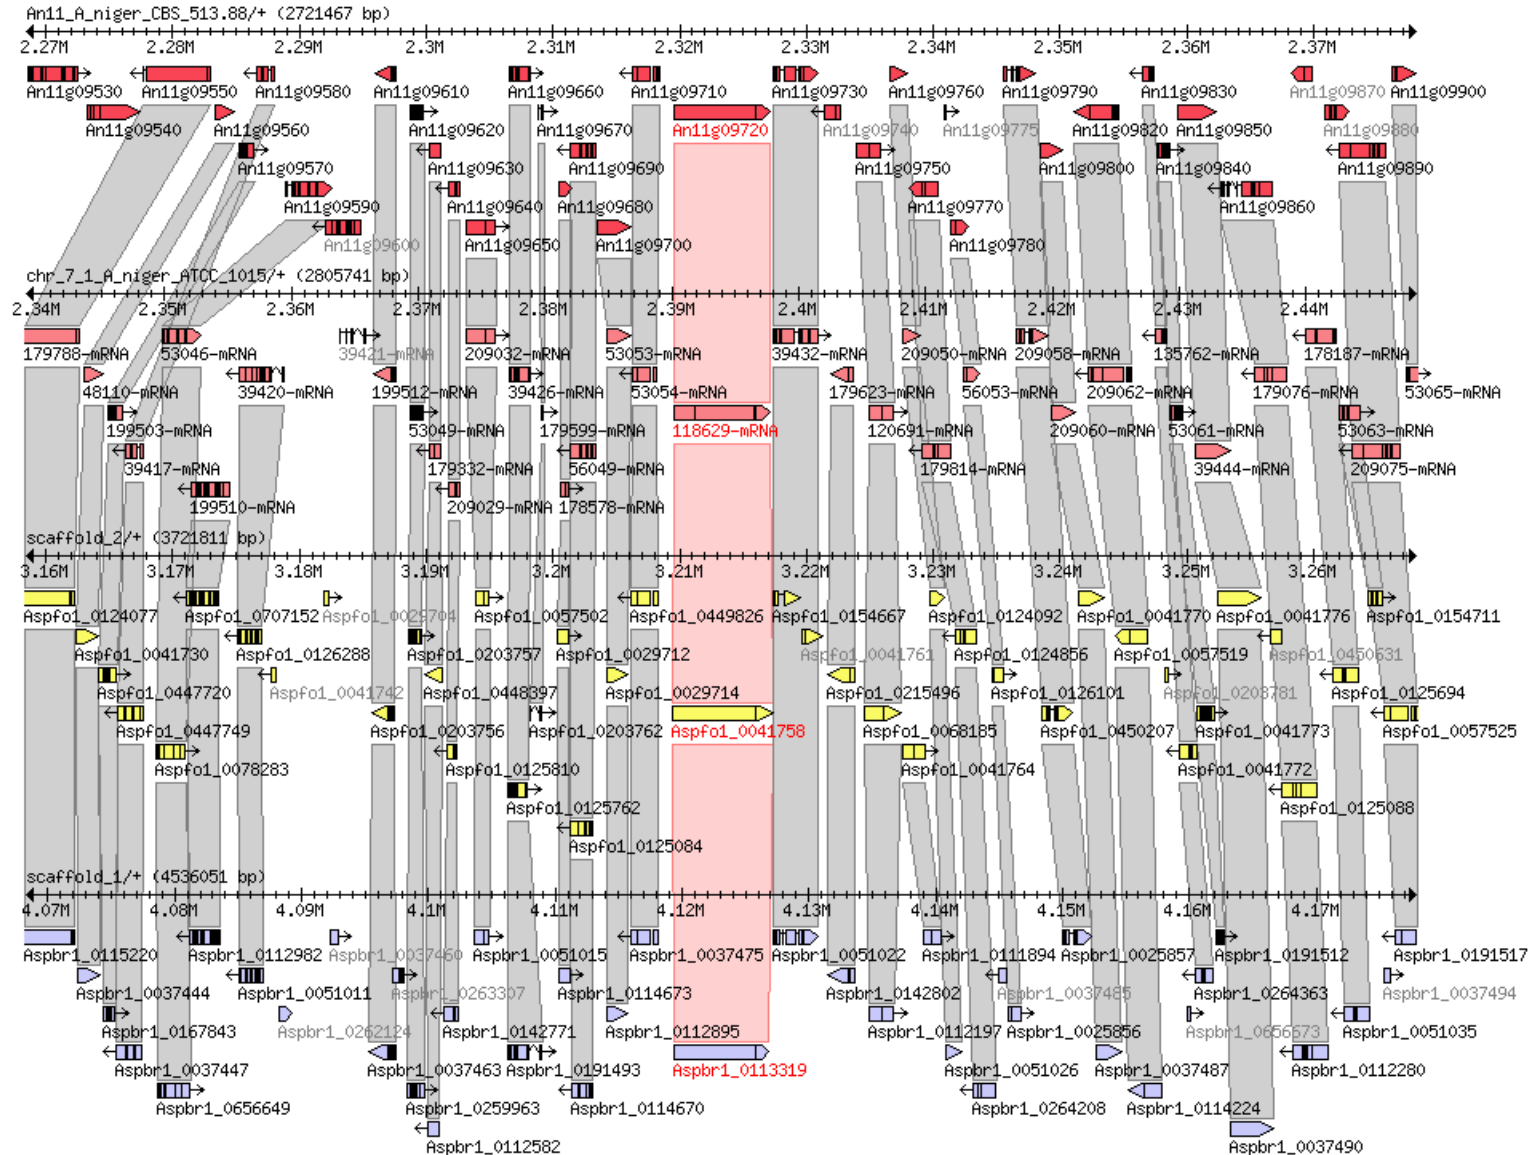

**An11g09720 cluster**

| Gene id (SMURF)   | Gene positions | Gene distance | AspGD name | AspGD description line or supplemental annotation                                                                                                                                  | protein ID (antiSMASH) | AspGD ID                 |
|-------------------|----------------|---------------|------------|------------------------------------------------------------------------------------------------------------------------------------------------------------------------------------|------------------------|--------------------------|
| n/a               |                |               | rhoC       | Rho GTPase                                                                                                                                                                         | n/a<br>prot_ID_1072    | An11g09610<br>An11g09620 |
| n/a               |                |               |            | Domain(s) with predicted octanoyltransferase activity, role in cellular protein modification process, lipoate biosynthetic process and cytoplasm localization                      | prot_ID_871            | An11g09630               |
| n/a               |                |               |            | Domain(s) with predicted FMN binding, pyridoxamine-phosphate oxidase activity and role in oxidation-reduction process                                                              | prot_ID_734            | An11g09640               |
| n/a               |                |               |            | Ortholog of A. nidulans FGSC A4 : AN4779, A. fumigatus Af293 : Afu3g06660, A. oryzae RIB40 : AO090020000332, A. niger ATCC 1015 : 209032-mRNA and A. versicolor : Aspve1_0051759   | prot_ID_630            | An11g09650               |
| n/a               |                |               |            | Domain(s) with predicted phosphotransferase activity, for other substituted phosphate groups activity, role in phospholipid biosynthetic process and membrane localization         | prot_ID_704            | An11g09660               |
| n/a               |                |               |            | Ortholog(s) have structural constituent of ribosome activity                                                                                                                       | prot_ID_119            | An11g09670               |
| n/a               |                |               |            | Ortholog of A. nidulans FGSC A4 : AN4776, A. fumigatus Af293 : Afu3g06620, A. niger CBS 513.88 : An18g00880, A. oryzae RIB40 : AO090020000337 and A. niger ATCC 1015 : 178578-mRNA | prot_ID_929            | An11g09680               |
| n/a               |                |               |            | Ortholog of A. nidulans FGSC A4 : AN4775, A. fumigatus Af293 : Afu3g06610, A. oryzae RIB40 : AO090020000338, A. niger ATCC 1015 : 56049-mRNA and A. versicolor : Aspve1_0582820    | prot_ID_733            | An11g09690               |
| An11g09700        | 2              | 301           | met1       | Siroheme synthase; involved in siroheme biosynthesis                                                                                                                               | prot_ID_992            | An11g09700               |
| An11g09710        | 1              | 1161          |            | Domain(s) with predicted catalytic activity and role in metabolic process                                                                                                          | prot_ID_1036           | An11g09710               |
| <b>An11g09720</b> | 0              | 0             |            | Polyketide synthase                                                                                                                                                                | <b>prot_ID_707</b>     | <b>An11g09720</b>        |
| An11g09730        | -1             | 342           |            | Domain(s) with predicted deoxyribose-phosphate aldolase activity, role in deoxyribonucleotide catabolic process and cytoplasm localization                                         | prot_ID_783            | An11g09730               |
| An11g09740        | -2             | 545           |            |                                                                                                                                                                                    | prot_ID_837            | An11g09740               |

|     |    |                                                                                                                                                                                                                |             |            |
|-----|----|----------------------------------------------------------------------------------------------------------------------------------------------------------------------------------------------------------------|-------------|------------|
| n/a |    | Ortholog of <i>A. nidulans</i> FGSC A4 : AN9485, <i>A. fumigatus</i> Af293 : Afu3g06570, <i>A. niger</i> ATCC 1015 : 120691-mRNA, <i>A. versicolor</i> : Aspve1_0027334 and <i>A. sydowii</i> : Aspsy1_0087842 | prot_ID_240 | An11g09750 |
| n/a |    | Domain(s) with predicted 4 iron, 4 sulfur cluster binding, lipoate synthase activity and role in lipoate biosynthetic process                                                                                  | prot_ID_15  | An11g09760 |
| n/a |    | Phosphoserine phosphatase                                                                                                                                                                                      | prot_ID_715 | An11g09770 |
| n/a |    |                                                                                                                                                                                                                | prot_ID_335 | An11g09775 |
| n/a |    | PAPS reductase                                                                                                                                                                                                 | prot_ID_551 | An11g09780 |
| n/a | sC | ATP sulfurylase                                                                                                                                                                                                | prot_ID_464 | An11g09790 |

# An12g02670 cluster

Overlaps An12g02730 cluster

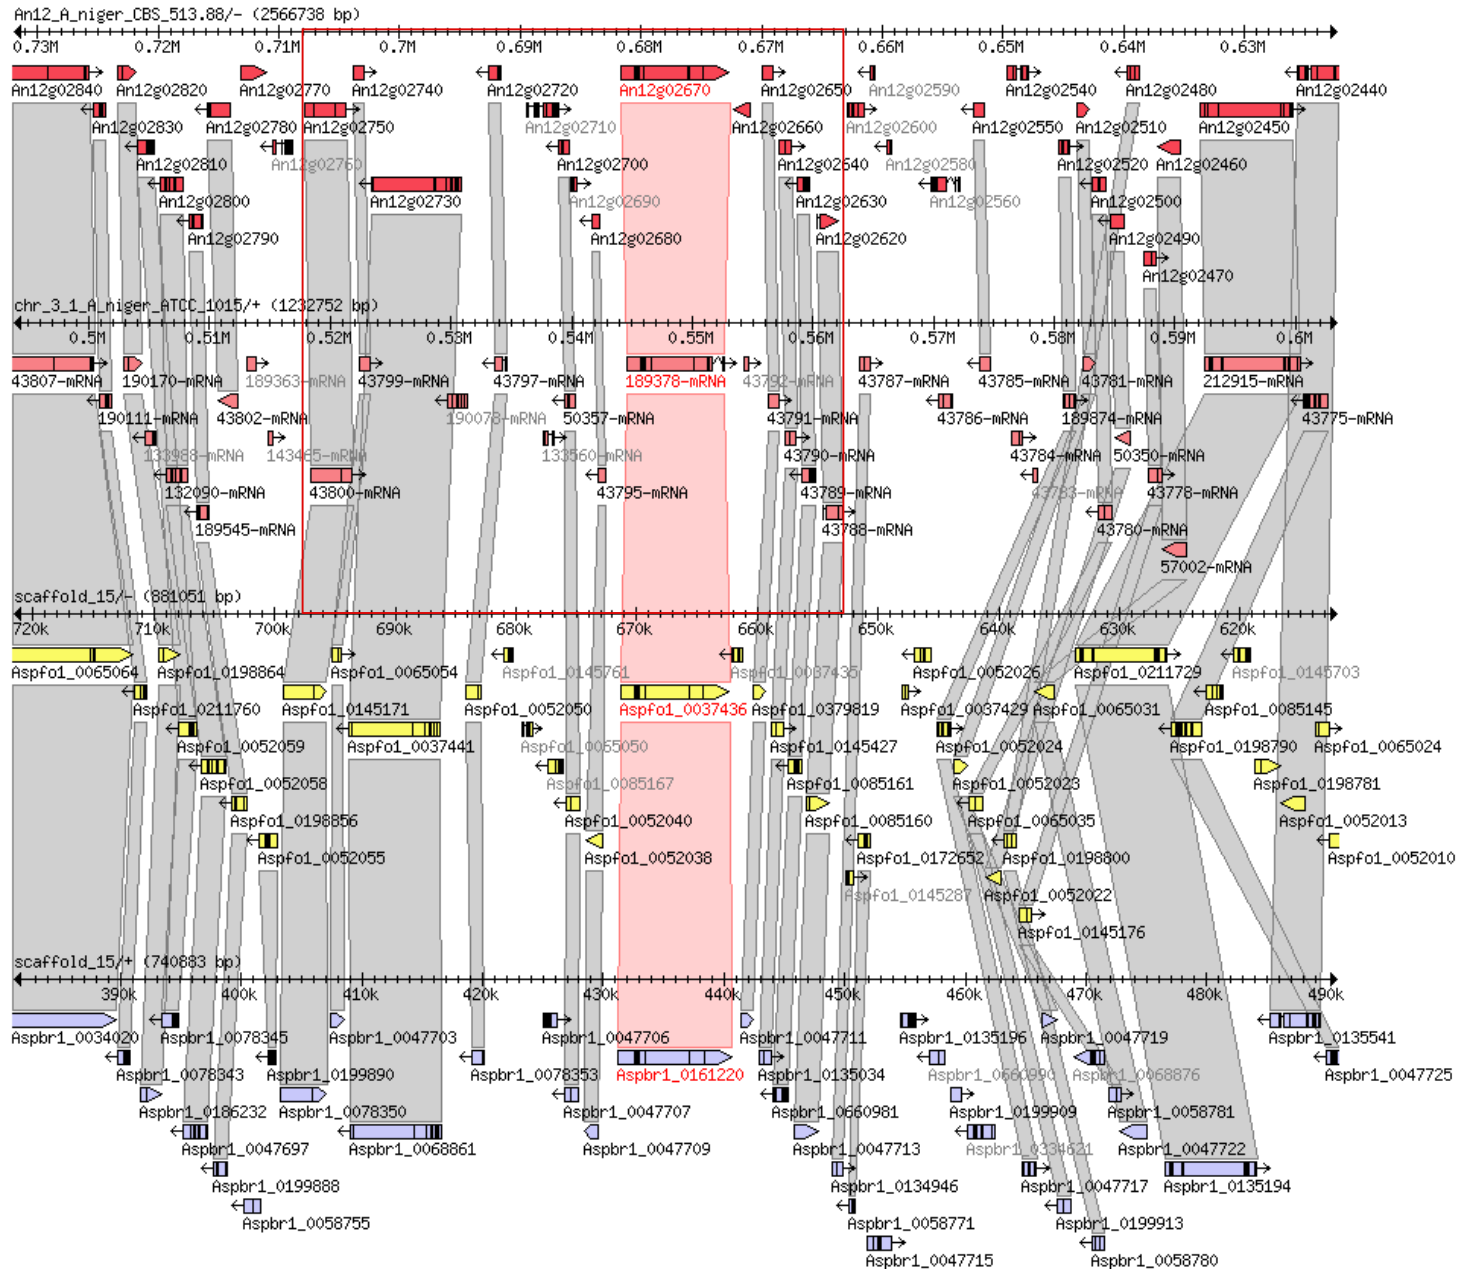

**An12g02670 cluster**

| Gene id (SMURF)   | Gene positions | Gene distance | AspGD name | AspGD description line or supplemental annotation                                                                                                                                                                                           | protein ID (antiSMASH) | AspGD ID          |     |
|-------------------|----------------|---------------|------------|---------------------------------------------------------------------------------------------------------------------------------------------------------------------------------------------------------------------------------------------|------------------------|-------------------|-----|
| n/a               |                |               |            |                                                                                                                                                                                                                                             | prot_ID_75             | An12g02560        |     |
| n/a               |                |               |            |                                                                                                                                                                                                                                             | prot_ID_396            | An12g02580        |     |
| n/a               |                |               |            |                                                                                                                                                                                                                                             | prot_ID_397            | An12g02590        |     |
| n/a               |                |               |            |                                                                                                                                                                                                                                             | prot_ID_165            | An12g02600        |     |
|                   |                |               |            | Ortholog of <i>A. nidulans</i> FGSC A4 : AN6322, AN0902, <i>A. fumigatus</i> Af293 : Afu1g01340, Afu1g15680, Afu3g01640 and <i>A. niger</i> CBS 513.88 : An01g14020, An08g01460, An11g09210, An11g04710, An05g01040, An05g01340, An04g04080 |                        |                   |     |
| n/a               |                |               |            |                                                                                                                                                                                                                                             | prot_ID_411            | An12g02620        | ECS |
| n/a               |                |               |            | Domain(s) with predicted nucleotide binding activity                                                                                                                                                                                        | prot_ID_285            | An12g02630        |     |
| n/a               |                |               |            | Oxidoreductase                                                                                                                                                                                                                              | prot_ID_242            | An12g02640        |     |
| An12g02650        | 2              | 941           |            | Domain(s) with predicted methyltransferase activity and role in metabolic process                                                                                                                                                           | prot_ID_41             | An12g02650        |     |
| An12g02660        | 1              | 247           |            | Ortholog of <i>Aspergillus aculeatus</i> ATCC16872 : Aacu16872_059428                                                                                                                                                                       | prot_ID_1006           | An12g02660        |     |
| <b>An12g02670</b> | 0              | 0             |            | Multifunctional polyketide synthase                                                                                                                                                                                                         | <b>prot_ID_565</b>     | <b>An12g02670</b> |     |
|                   |                |               |            | Ortholog of <i>A. nidulans</i> FGSC A4 : AN11765, <i>A. fumigatus</i> Af293 : Afu3g07625, <i>A. niger</i> CBS 513.88 : An02g12900, An04g10150 and <i>A. oryzae</i> RIB40 : AO090020000130, AO090023000386                                   |                        |                   |     |
| An12g02680        | -1             | 1828          |            |                                                                                                                                                                                                                                             | prot_ID_600            | An12g02680        |     |
| An12g02690        | -2             | 1198          |            | Domain(s) with predicted heme binding activity                                                                                                                                                                                              | prot_ID_17             | An12g02690        |     |
| An12g02700        | -3             | 125           |            | Oxidoreductase                                                                                                                                                                                                                              | prot_ID_521            | An12g02700        |     |
| An12g02710        | -4             | 77            |            | Putative transporter                                                                                                                                                                                                                        | prot_ID_868            | An12g02710        |     |
|                   |                |               |            | Ortholog of <i>A. nidulans</i> FGSC A4 : AN11199, <i>A. niger</i> CBS 513.88 : An11g04260, <i>A. niger</i> ATCC 1015 : 39024-mRNA, <i>A. versicolor</i> : Aspve1_0053145 and <i>A. sydowii</i> : Aspsy1_0057345                             |                        |                   |     |
| An12g02720        | -5             | 2152          |            |                                                                                                                                                                                                                                             | prot_ID_846            | An12g02720        |     |
| An12g02730        | -6             | 2325          |            | Multifunctional polyketide synthase                                                                                                                                                                                                         | prot_ID_734            | An12g02730        |     |
|                   |                |               |            | Ortholog of <i>A. brasiliensis</i> : Aspbr1_0047703, <i>Aspergillus flavus</i> NRRL 3357 : AFL2T_11821, <i>A. acidus</i> : Aspfo1_0065054 and <i>Aspergillus terreus</i> NIH2624 : ATET_02827                                               |                        |                   |     |
| An12g02740        | -7             | 535           |            |                                                                                                                                                                                                                                             | prot_ID_975            | An12g02740        |     |
| An12g02750        | -8             | 475           |            | Putative polyketide synthase                                                                                                                                                                                                                | prot_ID_139            | An12g02750        | ECS |
|                   |                |               |            | Domain(s) with predicted carbon-sulfur lyase activity and role in metabolic process                                                                                                                                                         |                        |                   |     |
| An12g02760        | -9             | 1081          |            |                                                                                                                                                                                                                                             | prot_ID_1000           | An12g02760        |     |
| An12g02770        | -10            | 404           |            | Ortholog of <i>Aspergillus terreus</i> NIH2624 : ATET_09243                                                                                                                                                                                 | prot_ID_410            | An12g02770        |     |



|            |     |      |                                                                                                                                                                                                             |              |            |
|------------|-----|------|-------------------------------------------------------------------------------------------------------------------------------------------------------------------------------------------------------------|--------------|------------|
| An12g02780 | -11 | 739  | Domain(s) with predicted carbohydrate binding, metallopeptidase activity, zinc ion binding activity and role in cell adhesion, proteolysis                                                                  | prot_ID_645  | An12g02780 |
| An12g02790 | -12 | 347  | Domain(s) with predicted nucleotide binding activity                                                                                                                                                        | prot_ID_1015 | An12g02790 |
| An12g02800 | -13 | 507  | Domain(s) with predicted role in transmembrane transport and integral to membrane localization                                                                                                              | prot_ID_273  | An12g02800 |
| An12g02810 | -14 | 599  | Domain(s) with predicted O-methyltransferase activity                                                                                                                                                       | prot_ID_21   | An12g02810 |
| An12g02820 | -15 | 98   | Domain(s) with predicted role in transmembrane transport and integral to membrane localization                                                                                                              | prot_ID_175  | An12g02820 |
| An12g02830 | -16 | 1107 | Ortholog(s) have role in austinol biosynthetic process, dehydroaustinol biosynthetic process, secondary metabolite biosynthetic process                                                                     | prot_ID_469  | An12g02830 |
| n/a        |     |      | Ortholog(s) have role in brevianamide F biosynthetic process, emericellamide biosynthetic process, pathogenesis, secondary metabolite biosynthetic process, spore germination                               | prot_ID_804  | An12g02840 |
| n/a        |     |      | Thioredoxin reductase                                                                                                                                                                                       | prot_ID_182  | An12g02850 |
| n/a        |     |      | Domain(s) with predicted role in transmembrane transport and integral to membrane localization                                                                                                              | prot_ID_322  | An12g02860 |
| n/a        |     |      |                                                                                                                                                                                                             | prot_ID_1023 | An12g02870 |
| n/a        |     |      | Domain(s) with predicted DNA binding, sequence-specific DNA binding RNA polymerase II transcription factor activity, sequence-specific DNA binding transcription factor activity, zinc ion binding activity | prot_ID_1017 | An12g02880 |
| n/a        |     |      | Branched chain amino acid aminotransferase                                                                                                                                                                  | prot_ID_729  | An12g02890 |
| n/a        |     |      | Ortholog of <i>A. niger</i> ATCC 1015 : 54493-mRNA                                                                                                                                                          | prot_ID_964  | An12g02900 |
| n/a        |     |      |                                                                                                                                                                                                             | prot_ID_278  | An12g02910 |
| n/a        |     |      | Putative chitinase                                                                                                                                                                                          | prot_ID_462  | An12g02920 |

# An12g02730 cluster

Overlaps An12g02670 cluster

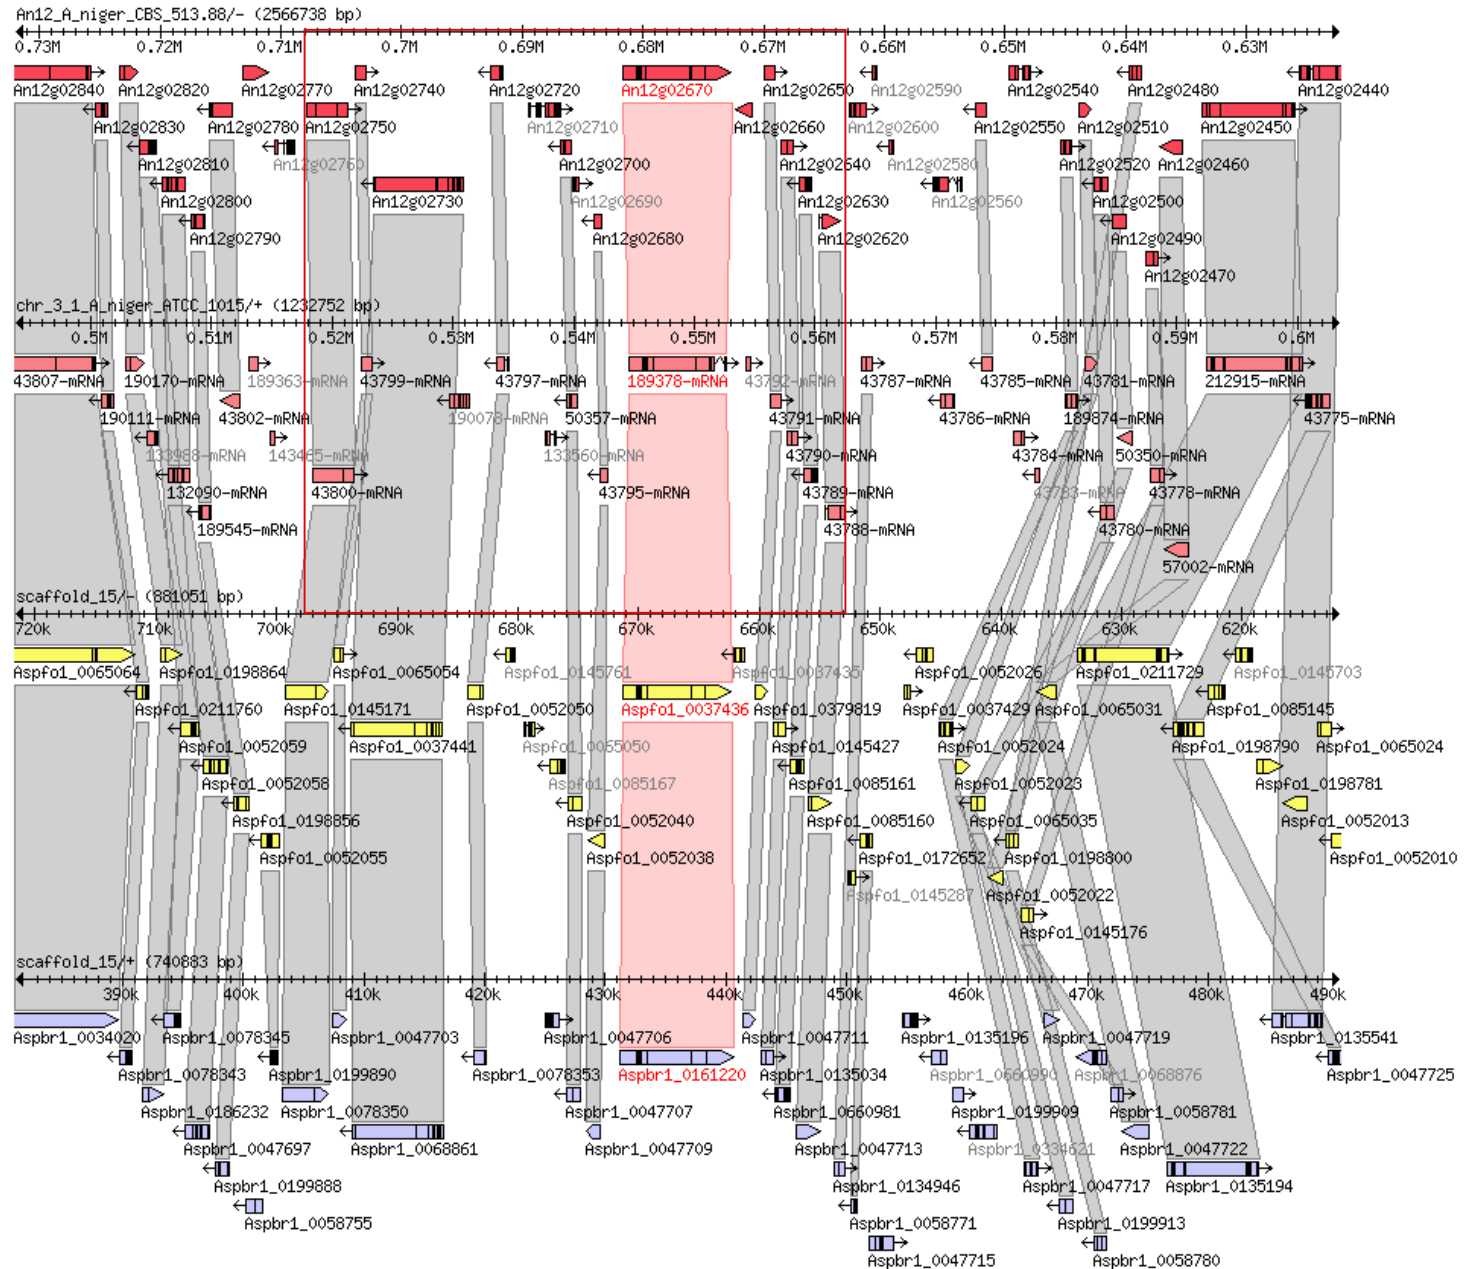

**An12g02730 cluster**

| Gene id (SMURF)   | Gene positions | Gene distance | AspGD name | AspGD description line or supplemental annotation                                                                                                                                                                                                                                                                                                                                                      | protein ID (antiSMASH) | AspGD ID |
|-------------------|----------------|---------------|------------|--------------------------------------------------------------------------------------------------------------------------------------------------------------------------------------------------------------------------------------------------------------------------------------------------------------------------------------------------------------------------------------------------------|------------------------|----------|
| An12g02670        | 6              | 1828          |            | Domain(s) with predicted ACP phosphopantetheine attachment site binding involved in fatty acid biosynthetic process, L-aminoadipate-semialdehyde dehydrogenase activity and nucleotide binding, more<br>Ortholog of A. nidulans FGSC A4 : AN11765, A. fumigatus Af293 : Afu3g07625, A. niger CBS 513.88 : An02g12900, An04g10150 and A. oryzae RIB40 : AO090020000130, AO090023000386                  |                        |          |
| An12g02680        | 5              | 1198          |            |                                                                                                                                                                                                                                                                                                                                                                                                        |                        |          |
| An12g02690        | 4              | 125           |            | Domain(s) with predicted heme binding activity                                                                                                                                                                                                                                                                                                                                                         |                        |          |
| An12g02700        | 3              | 77            |            | Domain(s) with predicted nucleotide binding, oxidoreductase activity and role in oxidation-reduction process                                                                                                                                                                                                                                                                                           |                        |          |
| An12g02710        | 2              | 2152          |            |                                                                                                                                                                                                                                                                                                                                                                                                        |                        |          |
| An12g02720        | 1              | 2325          |            | Ortholog of A. nidulans FGSC A4 : AN11199, A. niger CBS 513.88 : An11g04260, A. niger ATCC 1015 : 39024-mRNA, A. versicolor : Aspve1_0053145 and A. sydowii : Aspsy1_0057345<br>Ortholog(s) have role in asperfuranone biosynthetic process, emericellamide biosynthetic process, monodictyphenone biosynthetic process, o-orsellinic acid biosynthetic process, sterigmatocystin biosynthetic process |                        |          |
| <b>An12g02730</b> | 0              | 0             |            |                                                                                                                                                                                                                                                                                                                                                                                                        |                        |          |
| An12g02740        | -1             | 535           |            | Ortholog of A. brasiliensis : Aspbr1_0047703, Aspergillus flavus NRRL 3357 : AFL2T_11821, A. acidus : Aspfo1_0065054 and Aspergillus terreus NIH2624 : ATET_02827                                                                                                                                                                                                                                      |                        |          |
| An12g02750        | -2             | 475           |            | Domain(s) with predicted ACP phosphopantetheine attachment site binding involved in fatty acid biosynthetic process, catalytic activity and role in metabolic process                                                                                                                                                                                                                                  |                        |          |
| An12g02760        | -3             | 1081          |            | Domain(s) with predicted carbon-sulfur lyase activity and role in metabolic process                                                                                                                                                                                                                                                                                                                    |                        |          |
| An12g02770        | -4             | 404           |            | Ortholog of Aspergillus terreus NIH2624 : ATET_09243                                                                                                                                                                                                                                                                                                                                                   |                        |          |
| An12g02780        | -5             | 739           |            | Domain(s) with predicted carbohydrate binding, metalloproteinase activity, zinc ion binding activity and role in cell adhesion, proteolysis                                                                                                                                                                                                                                                            |                        |          |
| An12g02790        | -6             | 347           |            | Domain(s) with predicted nucleotide binding activity                                                                                                                                                                                                                                                                                                                                                   |                        |          |
| An12g02800        | -7             | 507           |            | Domain(s) with predicted role in transmembrane transport and integral to membrane localization                                                                                                                                                                                                                                                                                                         |                        |          |
| An12g02810        | -8             | 599           |            | Domain(s) with predicted O-methyltransferase activity                                                                                                                                                                                                                                                                                                                                                  |                        |          |
| An12g02820        | -9             | 98            |            | Domain(s) with predicted role in transmembrane transport and integral to membrane localization                                                                                                                                                                                                                                                                                                         |                        |          |

|            |     |      |                                                                                                                                                                                                             |
|------------|-----|------|-------------------------------------------------------------------------------------------------------------------------------------------------------------------------------------------------------------|
| An12g02830 | -10 | 1107 | Ortholog(s) have role in austinol biosynthetic process, dehydroaustinol biosynthetic process, secondary metabolite biosynthetic process                                                                     |
| An12g02840 | -11 | 208  | Ortholog(s) have role in brevianamide F biosynthetic process, emericellamide biosynthetic process, pathogenesis, secondary metabolite biosynthetic process, spore germination                               |
| An12g02850 | -12 | 516  | Thioredoxin reductase                                                                                                                                                                                       |
| An12g02860 | -13 | 608  | Domain(s) with predicted role in transmembrane transport and integral to membrane localization                                                                                                              |
| An12g02870 | -14 | 1024 |                                                                                                                                                                                                             |
| An12g02880 | -15 | 231  | Domain(s) with predicted DNA binding, sequence-specific DNA binding RNA polymerase II transcription factor activity, sequence-specific DNA binding transcription factor activity, zinc ion binding activity |
| An12g02890 | -16 | 1981 | Branched chain amino acid aminotransferase                                                                                                                                                                  |
| An12g02900 | -17 | 1200 | Ortholog of A. niger ATCC 1015 : 54493-mRNA                                                                                                                                                                 |

# An12g02840 cluster

Overlaps An12g02730 cluster

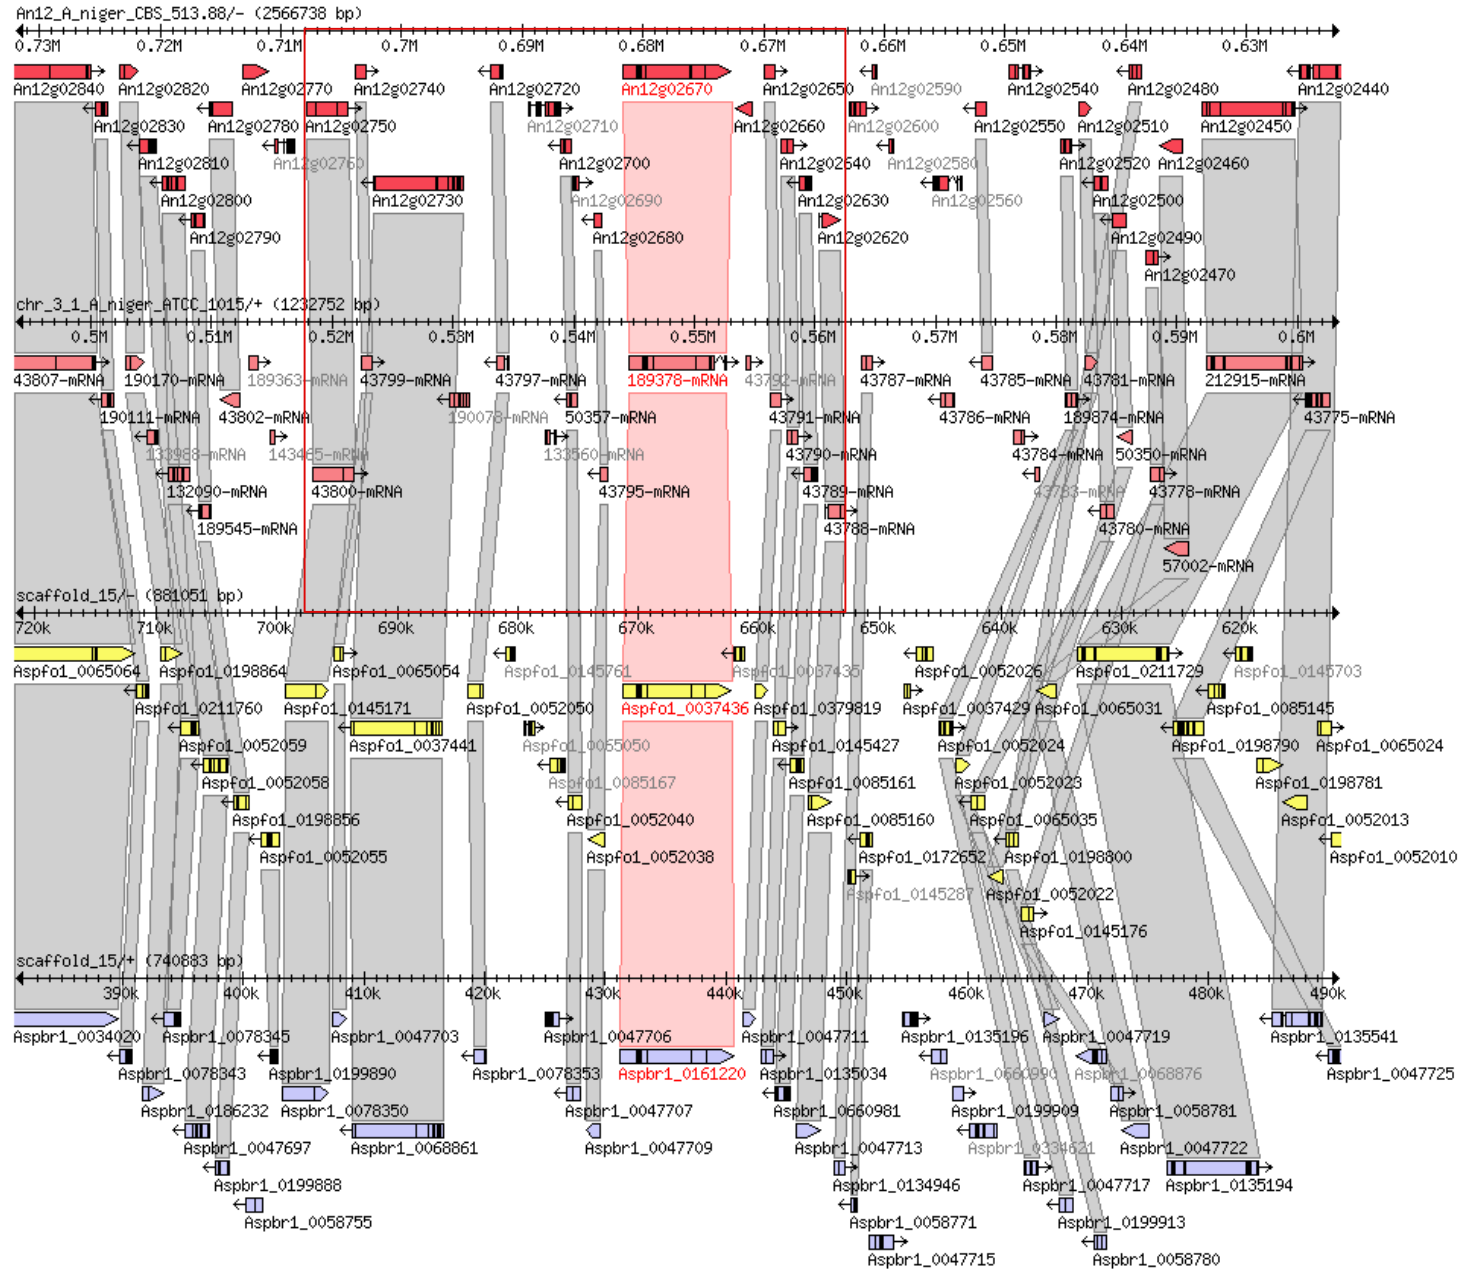

**An12g02840 cluster**

| Gene id (SMURF) | Gene positions | Gene distance | AspGD name | AspGD description line or supplemental annotation                                                                                                                                                                      | protein ID (antiSMASH) | AspGD ID |
|-----------------|----------------|---------------|------------|------------------------------------------------------------------------------------------------------------------------------------------------------------------------------------------------------------------------|------------------------|----------|
| An12g02680      | 16             | 1198          |            | Ortholog of A. nidulans FGSC A4 : AN11765, A. fumigatus Af293 : Afu3g07625, A. niger CBS 513.88 : An02g12900, An04g10150 and A. oryzae RIB40 : AO090020000130, AO090023000386                                          |                        |          |
| An12g02690      | 15             | 125           |            | Domain(s) with predicted heme binding activity                                                                                                                                                                         |                        |          |
| An12g02700      | 14             | 77            |            | Domain(s) with predicted nucleotide binding, oxidoreductase activity and role in oxidation-reduction process                                                                                                           |                        |          |
| An12g02710      | 13             | 2152          |            |                                                                                                                                                                                                                        |                        |          |
| An12g02720      | 12             | 2325          |            | Ortholog of A. nidulans FGSC A4 : AN11199, A. niger CBS 513.88 : An11g04260, A. niger ATCC 1015 : 39024-mRNA, A. versicolor : Aspve1_0053145 and A. sydowii : Aspsy1_0057345                                           |                        |          |
| An12g02730      | 11             | 535           |            | Ortholog(s) have role in asperfuranone biosynthetic process, emericellamide biosynthetic process, monodictyphenone biosynthetic process, o-orsellinic acid biosynthetic process, sterigmatocystin biosynthetic process |                        |          |
| An12g02740      | 10             | 475           |            | Ortholog of A. brasiliensis : Aspbr1_0047703, Aspergillus flavus NRRL 3357 : AFL2T_11821, A. acidus : Aspfo1_0065054 and Aspergillus terreus NIH2624 : ATET_02827                                                      |                        |          |
| An12g02750      | 9              | 1081          |            | Domain(s) with predicted ACP phosphopantetheine attachment site binding involved in fatty acid biosynthetic process, catalytic activity and role in metabolic process                                                  |                        |          |
| An12g02760      | 8              | 404           |            | Domain(s) with predicted carbon-sulfur lyase activity and role in metabolic process                                                                                                                                    |                        |          |
| An12g02770      | 7              | 739           |            | Ortholog of Aspergillus terreus NIH2624 : ATET_09243                                                                                                                                                                   |                        |          |
| An12g02780      | 6              | 347           |            | Domain(s) with predicted carbohydrate binding, metalloproteinase activity, zinc ion binding activity and role in cell adhesion, proteolysis                                                                            |                        |          |
| An12g02790      | 5              | 507           |            | Domain(s) with predicted nucleotide binding activity                                                                                                                                                                   |                        |          |
| An12g02800      | 4              | 599           |            | Domain(s) with predicted role in transmembrane transport and integral to membrane localization                                                                                                                         |                        |          |
| An12g02810      | 3              | 98            |            | Domain(s) with predicted O-methyltransferase activity                                                                                                                                                                  |                        |          |
| An12g02820      | 2              | 1107          |            | Domain(s) with predicted role in transmembrane transport and integral to membrane localization                                                                                                                         |                        |          |
| An12g02830      | 1              | 208           |            | Ortholog(s) have role in austinol biosynthetic process, dehydroaustinol biosynthetic process, secondary metabolite biosynthetic process                                                                                |                        |          |

|                   |    |      |                                                                                                                                                                                                             |
|-------------------|----|------|-------------------------------------------------------------------------------------------------------------------------------------------------------------------------------------------------------------|
| <b>An12g02840</b> | 0  | 0    | Ortholog(s) have role in brevianamide F biosynthetic process, emericellamide biosynthetic process, pathogenesis, secondary metabolite biosynthetic process, spore germination                               |
| An12g02850        | -1 | 516  | Thioredoxin reductase                                                                                                                                                                                       |
| An12g02860        | -2 | 608  | Domain(s) with predicted role in transmembrane transport and integral to membrane localization                                                                                                              |
| An12g02870        | -3 | 1024 |                                                                                                                                                                                                             |
| An12g02880        | -4 | 231  | Domain(s) with predicted DNA binding, sequence-specific DNA binding RNA polymerase II transcription factor activity, sequence-specific DNA binding transcription factor activity, zinc ion binding activity |

# An12g07070 cluster

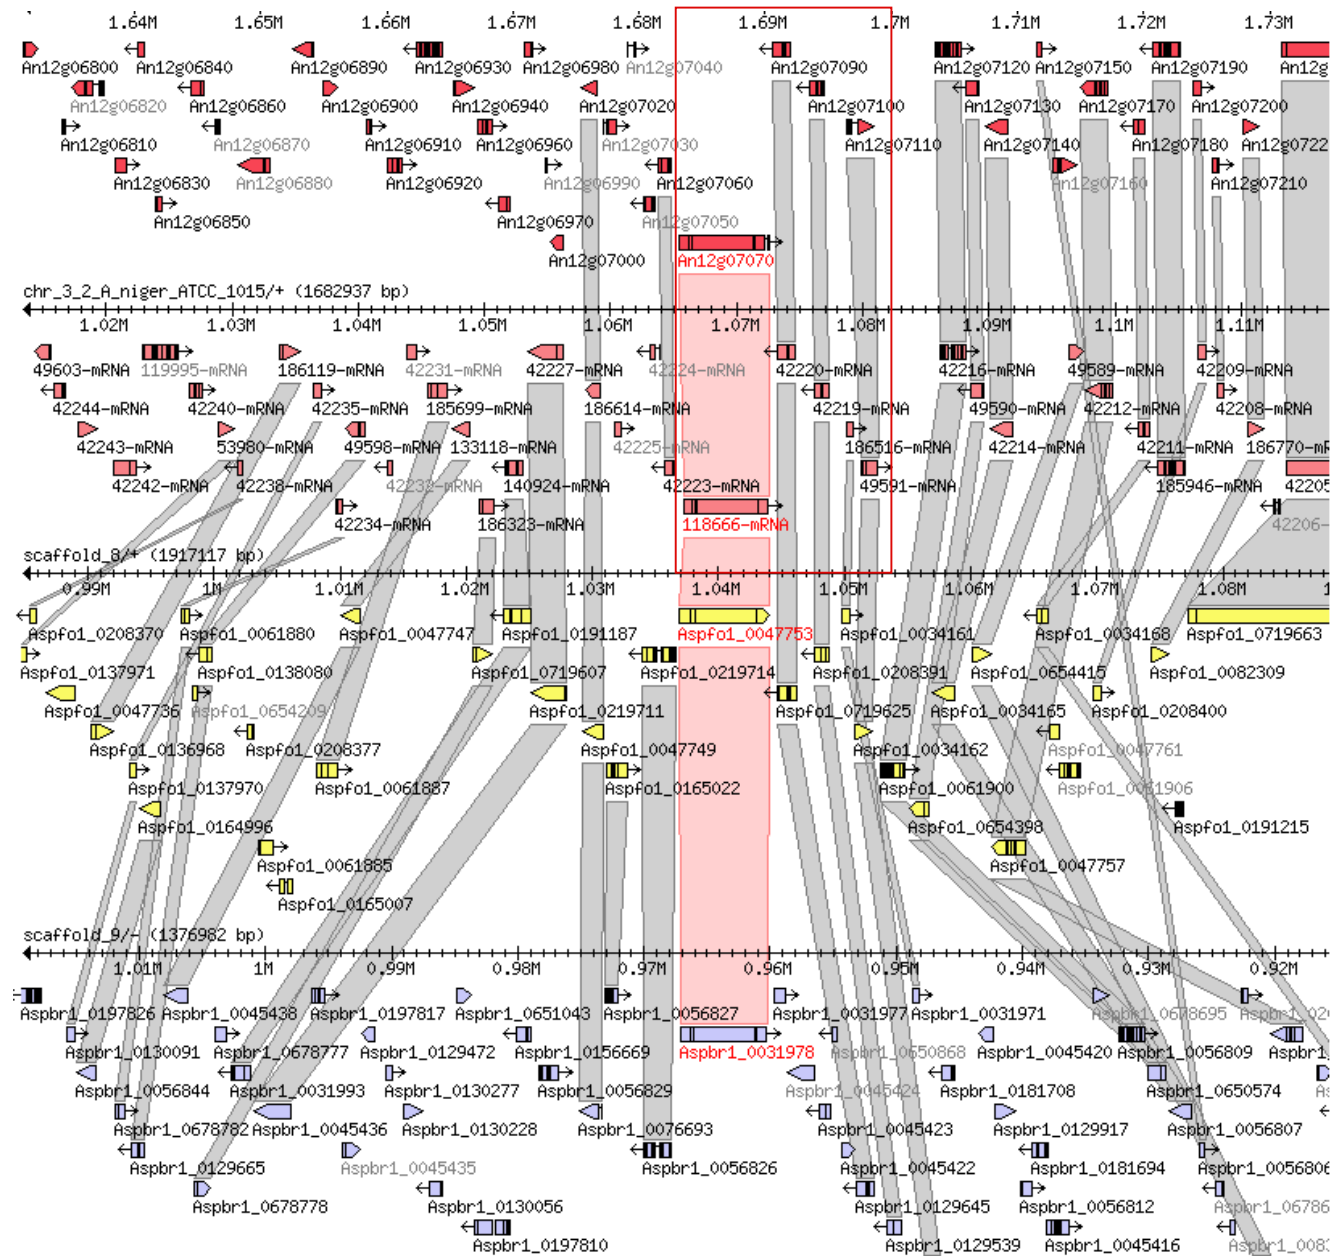



**An12g07070 cluster**

| Gene id (SMURF)   | Gene positions | Gene distance | AspGD name | AspGD description line or supplemental annotation                                                                                                                                                                                                                                                                 | protein ID (antiSMASH) | AspGD ID          |     |
|-------------------|----------------|---------------|------------|-------------------------------------------------------------------------------------------------------------------------------------------------------------------------------------------------------------------------------------------------------------------------------------------------------------------|------------------------|-------------------|-----|
| n/a               |                |               | amyA       | Alpha-amylase (1, 4-alpha-D-glucan 4-glucanohydrolase), hydrolyzes the alpha-1,4-glycosidic bonds in glycogen or starch; identical to An05g02100 Ortholog of A. fumigatus Af293 : Afu1g00550, Afu1g00910, A. niger CBS 513.88 : An05g02110, A. oryzae RIB40 : AO090120000200 and A. brasiliensis : Aspbr1_0139841 | prot_ID_813            | An12g06930        |     |
| n/a               |                |               |            | Ortholog of A. nidulans FGSC A4 : AN7889, AN4657, A. fumigatus Af293 : Afu1g00920, Afu3g06425 and A. niger CBS 513.88 : An07g04250, An05g02120, An01g11840                                                                                                                                                        | prot_ID_1052           | An12g06940        |     |
| n/a               |                |               |            | Domain(s) with predicted heat shock protein binding, unfolded protein binding activity and role in protein folding                                                                                                                                                                                                | prot_ID_942            | An12g06960        |     |
| n/a               |                |               |            | Ortholog of A. oryzae RIB40 : AO090023000974, AO090023000942 and Aspergillus carbonarius ITEM 5010 : Acar5010_206391                                                                                                                                                                                              | prot_ID_513            | An12g06970        |     |
| n/a               |                |               |            | Putative reverse transcriptase                                                                                                                                                                                                                                                                                    | prot_ID_11             | An12g06980        |     |
| n/a               |                |               |            | Domain(s) with predicted DNA binding activity and role in DNA integration                                                                                                                                                                                                                                         | prot_ID_1036           | An12g06990        |     |
| n/a               |                |               |            | Ortholog of A. nidulans FGSC A4 : AN7534, A. brasiliensis : Aspbr1_0076693, A. niger ATCC 1015 : 186614-mRNA, A. acidus : Aspfo1_0047749 and A. versicolor : Aspve1_0085820                                                                                                                                       | prot_ID_584            | An12g07000        |     |
| n/a               |                |               |            | Similar to stress response mediator Wsc3                                                                                                                                                                                                                                                                          | prot_ID_1005           | An12g07020        |     |
| n/a               |                |               |            | Questionable ORF                                                                                                                                                                                                                                                                                                  | prot_ID_730            | An12g07030        |     |
| An12g07050        | 2              | 251           |            | Weak similarity to dihydrofolate reductase                                                                                                                                                                                                                                                                        | prot_ID_383            | An12g07040        |     |
| An12g07060        | 1              | 686           |            | Ortholog of A. niger ATCC 1015 : 42223-mRNA                                                                                                                                                                                                                                                                       | prot_ID_1035           | An12g07050        |     |
| <b>An12g07070</b> | 0              | 0             |            | Putative polyketide synthase                                                                                                                                                                                                                                                                                      | prot_ID_4              | An12g07060        | ECS |
|                   |                |               |            | Domain(s) with predicted UDP-N-acetylmuramate dehydrogenase activity, flavin adenine dinucleotide binding activity and role in oxidation-reduction process                                                                                                                                                        | <b>prot_ID_592</b>     | <b>An12g07070</b> |     |
| An12g07090        | -1             | 273           |            | Ortholog of A. brasiliensis : Aspbr1_0129539, N. fischeri NRRL 181 : NFIA_005310, A. acidus : Aspfo1_0208391 and A. versicolor : Aspve1_0165969                                                                                                                                                                   | prot_ID_1004           | An12g07090        |     |
| An12g07100        | -2             | 1547          |            | Domain(s) with predicted isochorismate synthase activity, oxo-acid-lyase activity and role in biosynthetic process                                                                                                                                                                                                | prot_ID_777            | An12g07100        |     |
| An12g07110        | -3             | 1806          |            |                                                                                                                                                                                                                                                                                                                   | prot_ID_571            | An12g07110        | ECS |

|     |                                                                                                                                                                                                                                            |             |            |
|-----|--------------------------------------------------------------------------------------------------------------------------------------------------------------------------------------------------------------------------------------------|-------------|------------|
| n/a | Domain(s) with predicted electron carrier activity, heme binding, iron ion binding, oxidoreductase activity, acting on paired donors, with incorporation or reduction of molecular oxygen activity and role in oxidation-reduction process | prot_ID_702 | An12g07120 |
| n/a | Domain(s) with predicted nucleotide binding activity                                                                                                                                                                                       | prot_ID_930 | An12g07130 |
| n/a | Domain(s) with predicted DNA binding, sequence-specific DNA binding RNA polymerase II transcription factor activity, zinc ion binding activity and role in regulation of transcription, DNA-dependent, transcription, DNA-dependent        | prot_ID_34  | An12g07140 |

## An12g07230 cluster

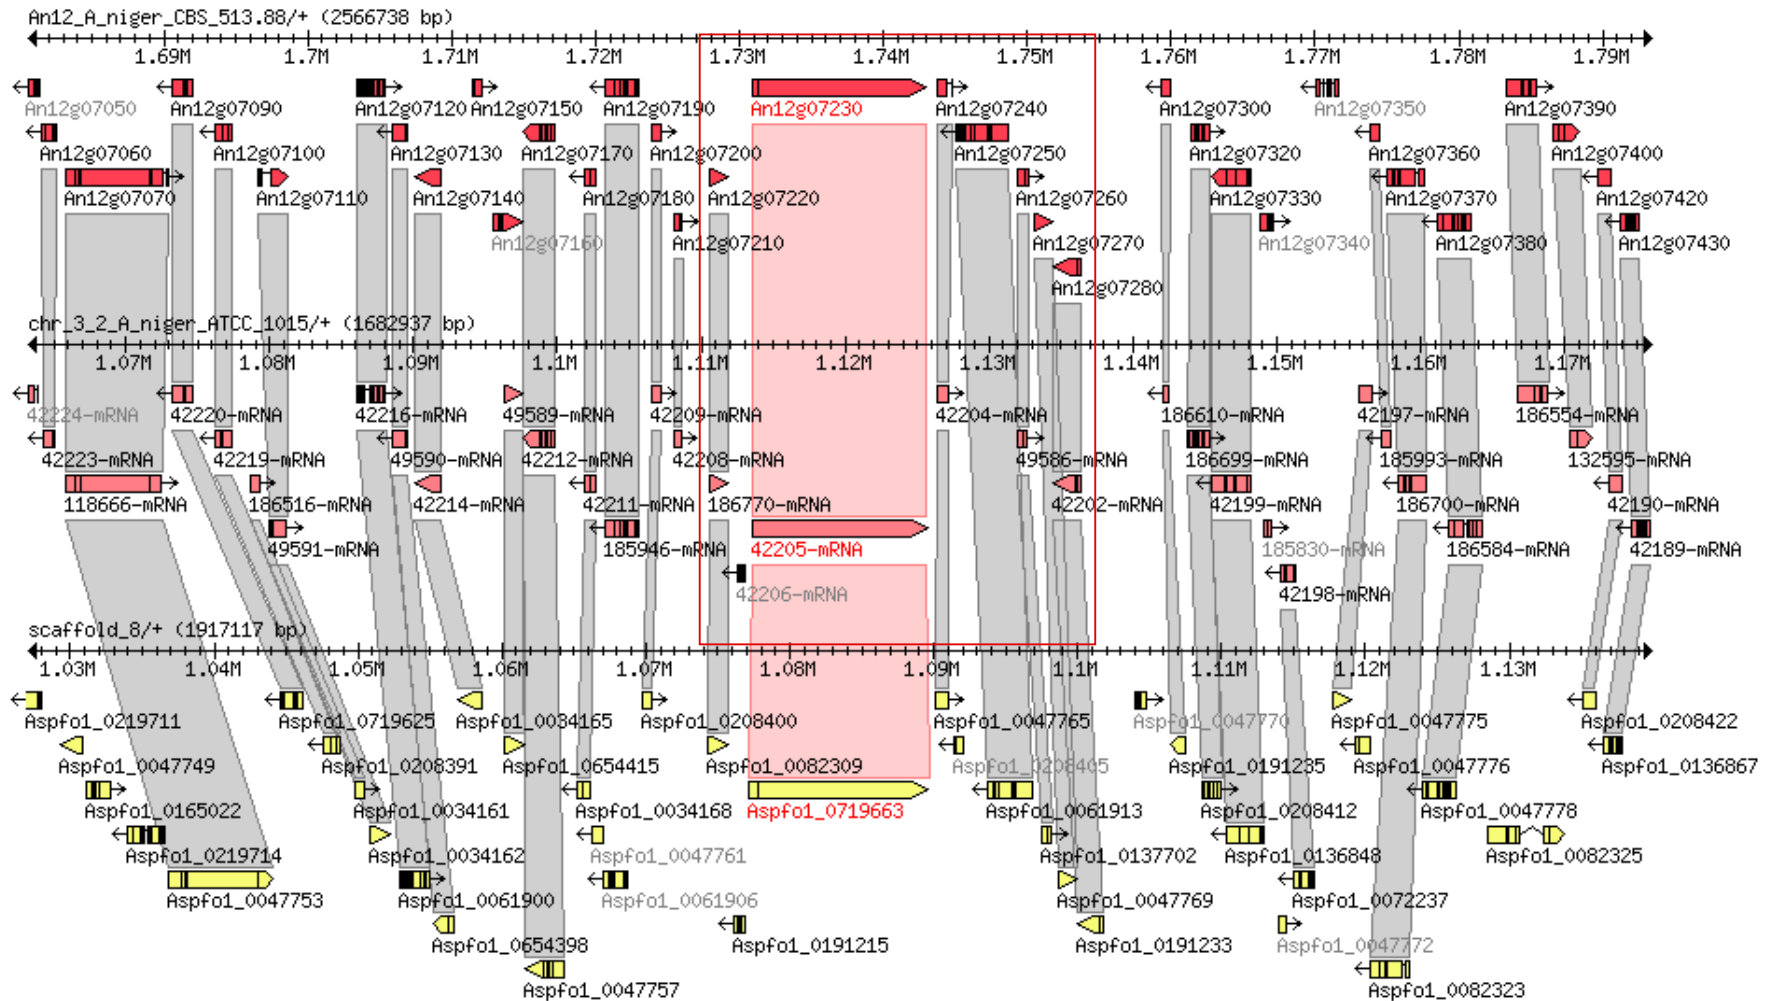

**An12g07230 cluster**

| Gene id (SMURF)   | Gene positions | Gene distance | AspGD name | AspGD description line or supplemental annotation                                                                                                                                                                                                                                             | protein ID (antiSMASH) | AspGD ID          |
|-------------------|----------------|---------------|------------|-----------------------------------------------------------------------------------------------------------------------------------------------------------------------------------------------------------------------------------------------------------------------------------------------|------------------------|-------------------|
| An12g07120        | 11             | 372           |            | Domain(s) with predicted electron carrier activity, heme binding, iron ion binding, oxidoreductase activity, acting on paired donors, with incorporation or reduction of molecular oxygen activity and role in oxidation-reduction process                                                    | n/a                    | An12g07120        |
| An12g07130        | 10             | 550           |            | Domain(s) with predicted nucleotide binding activity                                                                                                                                                                                                                                          | n/a                    | An12g07130        |
| An12g07140        | 9              | 2301          |            | GAL4-type Z(2)-Cys(6) DNA-binding transcription factor                                                                                                                                                                                                                                        | n/a                    | An12g07140        |
| An12g07150        | 8              | 791           |            | Ortholog of <i>A. oryzae</i> RIB40 : AO090120000038, <i>A. brasiliensis</i> : Aspbr1_0056806, Aspbr1_0669219, <i>Aspergillus flavus</i> NRRL 3357 : AFL2T_08074 and <i>Aspergillus aculeatus</i> ATCC16872 : Aacu16872_047628                                                                 | prot_ID_563            | An12g07150        |
| An12g07160        | 7              | 92            |            |                                                                                                                                                                                                                                                                                               | prot_ID_225            | An12g07160        |
| An12g07170        | 6              | 2059          |            | Domain(s) with predicted transporter activity, role in transmembrane transport and membrane localization<br>Ortholog of <i>A. brasiliensis</i> : Aspbr1_0049679, Aspbr1_0139846, Aspbr1_0181671, Aspbr1_0591537, <i>A. acidus</i> : Aspfo1_0034168 and <i>A. niger</i> ATCC 1015 : 42211-mRNA | prot_ID_590            | An12g07170        |
| An12g07180        | 5              | 647           |            | Domain(s) with predicted DNA binding, sequence-specific DNA binding RNA polymerase II transcription factor activity, sequence-specific DNA binding transcription factor activity, zinc ion binding activity                                                                                   | prot_ID_855            | An12g07180        |
| An12g07190        | 4              | 977           |            | Ortholog of <i>A. brasiliensis</i> : Aspbr1_0031950, <i>A. acidus</i> : Aspfo1_0208400 and <i>A. niger</i> ATCC 1015 : 42209-mRNA                                                                                                                                                             | prot_ID_818            | An12g07190        |
| An12g07200        | 3              | 936           |            | Ortholog of <i>A. niger</i> ATCC 1015 : 42208-mRNA                                                                                                                                                                                                                                            | prot_ID_459            | An12g07200        |
| An12g07210        | 2              | 1720          |            |                                                                                                                                                                                                                                                                                               | prot_ID_185            | An12g07210        |
| An12g07220        | 1              | 1768          |            | Domain(s) with predicted nucleotide binding activity<br>Domain(s) with predicted ACP phosphopantetheine attachment site binding involved in fatty acid biosynthetic process, hydrolase activity, acting on ester bonds, ligase activity, phosphopantetheine binding activity                  | prot_ID_742            | An12g07220 ECS    |
| <b>An12g07230</b> | 0              | 0             |            | Ortholog of <i>A. nidulans</i> FGSC A4 : AN9208, AN9311, <i>A. fumigatus</i> Af293 : Afu5g14850, <i>A. niger</i> CBS 513.88 : An12g05170, An03g01320 and <i>A. oryzae</i> RIB40 : AO090023000071, AO090026000100                                                                              | <b>prot_ID_415</b>     | <b>An12g07230</b> |
| An12g07240        | -1             | 689           |            | Domain(s) with predicted hydrolase activity, acting on carbon-nitrogen (but not peptide) bonds activity                                                                                                                                                                                       | prot_ID_638            | An12g07240        |
| An12g07250        | -2             | 268           |            | Ortholog of <i>A. nidulans</i> FGSC A4 : AN2942, AN10320, AN7130, <i>A. fumigatus</i> Af293 : Afu3g15110 and <i>A. niger</i>                                                                                                                                                                  | prot_ID_102            | An12g07250        |
| n/a               |                |               |            |                                                                                                                                                                                                                                                                                               | prot_ID_518            | An12g07260        |

|     |                                                                                                                                                                                                                                                                                                                                      |             |            |     |
|-----|--------------------------------------------------------------------------------------------------------------------------------------------------------------------------------------------------------------------------------------------------------------------------------------------------------------------------------------|-------------|------------|-----|
| n/a | CBS 513.88 : An03g05620, An15g07840, An03g02580, An01g14840<br>Ortholog of <i>A. brasiliensis</i> : Aspbr1_0045398 and <i>A. acidus</i> : Aspfo1_0047769<br>Domain(s) with predicted choline dehydrogenase activity, flavin adenine dinucleotide binding activity and role in alcohol metabolic process, oxidation-reduction process | prot_ID_908 | An12g07270 |     |
| n/a | Ortholog of <i>A. oryzae</i> RIB40 : AO090113000143, <i>A. brasiliensis</i> : Aspbr1_0045397, <i>A. niger</i> ATCC 1015 : 186610-mRNA and <i>Aspergillus flavus</i> NRRL 3357 : AFL2T_08621                                                                                                                                          | prot_ID_610 | An12g07280 | ECS |
| n/a | Domain(s) with predicted nucleotide binding activity                                                                                                                                                                                                                                                                                 | prot_ID_221 | An12g07300 |     |
| n/a | Domain(s) with predicted DNA binding, zinc ion binding activity, role in transcription, DNA-dependent and nucleus localization                                                                                                                                                                                                       | prot_ID_310 | An12g07320 |     |
| n/a |                                                                                                                                                                                                                                                                                                                                      | prot_ID_254 | An12g07330 |     |

# An12g10090 cluster

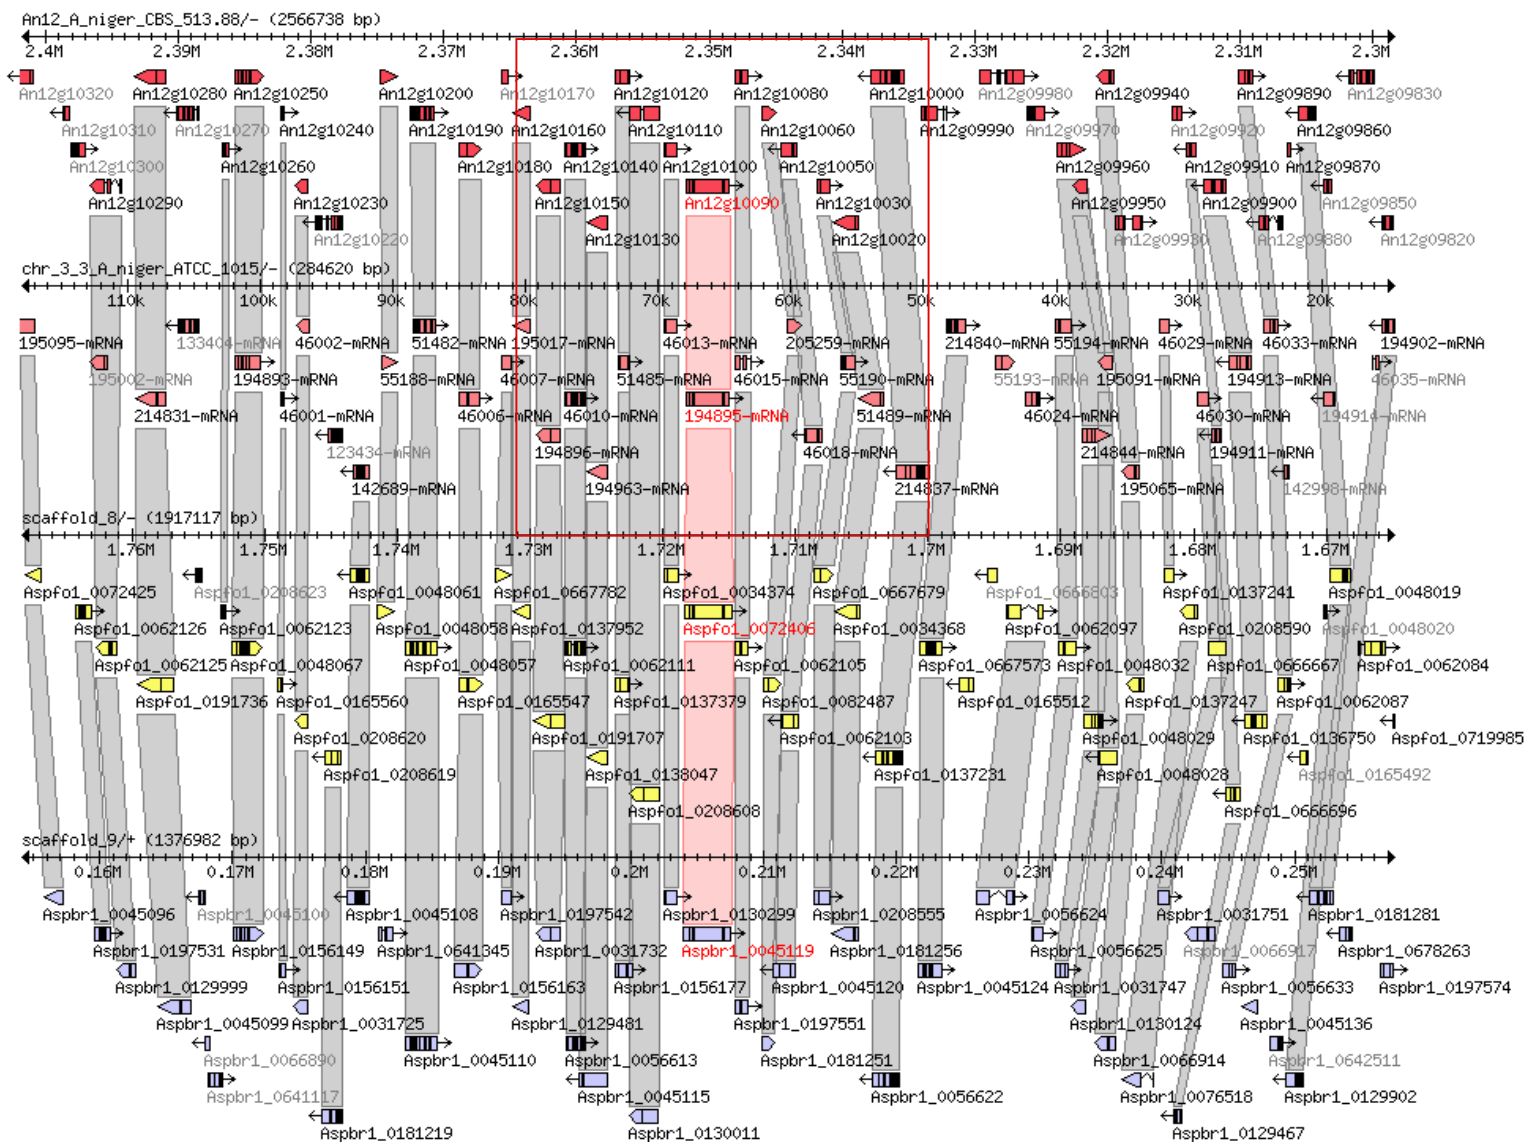

**An12g10090 cluster**

| Gene id (SMURF)   | Gene positions | Gene distance | AspGD name | AspGD description line or supplemental annotation                                                                                                                                                                                               | protein ID (antiSMASH) | AspGD ID          |     |
|-------------------|----------------|---------------|------------|-------------------------------------------------------------------------------------------------------------------------------------------------------------------------------------------------------------------------------------------------|------------------------|-------------------|-----|
| An12g09930        | 13             | 146           |            |                                                                                                                                                                                                                                                 | n/a                    | An12g09930        |     |
| An12g09940        | 12             | 725           |            | Stearoyl-CoA 9-desaturase                                                                                                                                                                                                                       | n/a                    | An12g09940        |     |
| An12g09950        | 11             | 69            |            | Putative alcohol dehydrogenase<br>Ortholog of A. nidulans FGSC A4 : AN5487, AN2619, A. niger CBS 513.88 : An12g02190, A. niger ATCC 1015 : 214844-mRNA, 43756-mRNA and A. versicolor : Aspve1_0121336, Aspve1_0206738                           | n/a                    | An12g09950        |     |
| An12g09960        | 10             | 916           |            |                                                                                                                                                                                                                                                 | n/a                    | An12g09960        |     |
| An12g09970        | 9              | 847           |            |                                                                                                                                                                                                                                                 | n/a                    |                   |     |
| An12g09980        | 8              | 2523          |            |                                                                                                                                                                                                                                                 | prot_ID_835            | An12g09980        |     |
| An12g09990        | 7              | 1607          |            | Ortholog of A. fumigatus Af293 : Afu5g14670 and A. fumigatus A1163 : AFUB_062340                                                                                                                                                                | prot_ID_844            | An12g09990        |     |
| An12g10000        | 6              | 1127          | gabA       | Putative GABA permease; expression repressed by tunicamycin and DTT<br>Domain(s) with predicted choline dehydrogenase activity, flavin adenine dinucleotide binding activity and role in alcohol metabolic process, oxidation-reduction process | prot_ID_817            | An12g10000        | ECS |
| An12g10020        | 5              | 282           |            | Ortholog of A. nidulans FGSC A4 : AN2922, AN1515, AN7536, A. oryzae RIB40 : AO090701000305, AO090102000038, AO090124000043 and A. niger ATCC 1015 : 55190-mRNA                                                                                  | prot_ID_188            | An12g10020        |     |
| An12g10030        | 4              | 1565          |            | Domain(s) with predicted catalytic activity and role in metabolic process                                                                                                                                                                       | prot_ID_491            | An12g10030        |     |
| An12g10050        | 3              | 350           |            | Domain(s) with predicted nucleotide binding, oxidoreductase activity and role in metabolic process                                                                                                                                              | prot_ID_137            | An12g10050        |     |
| An12g10060        | 2              | 1060          |            | Ortholog of A. nidulans FGSC A4 : AN9206, AN1849, A. fumigatus Af293 : Afu4g01210, Afu5g02320, Afu5g09930, A. niger CBS 513.88 : An03g02680, An12g02060 and A. oryzae RIB40 : AO090001000129, AO090010000537                                    | prot_ID_860            | An12g10060        |     |
| An12g10080        | 1              | 345           |            |                                                                                                                                                                                                                                                 | prot_ID_977            | An12g10080        |     |
| <b>An12g10090</b> | 0              | 0             |            | L-aminoadipatesemialdehyde dehydrogenase<br>Domain(s) with predicted 2-dehydropantoate 2-reductase activity, NADP binding activity, role in oxidation-reduction process, pantothenate biosynthetic process and cytoplasm localization           | <b>prot_ID_378</b>     | <b>An12g10090</b> |     |
| An12g10100        | -1             | 605           |            |                                                                                                                                                                                                                                                 | prot_ID_660            | An12g10100        |     |
| An12g10110        | -2             | 351           |            | GAL4 zinc binuclear cluster-type transcription factor                                                                                                                                                                                           | prot_ID_970            | An12g10110        |     |
| An12g10120        | -3             | 73            |            | Domain(s) with predicted metal ion binding activity                                                                                                                                                                                             | prot_ID_980            | An12g10120        |     |

|            |     |      |                                                                                                                                                                                                                            |              |            |     |
|------------|-----|------|----------------------------------------------------------------------------------------------------------------------------------------------------------------------------------------------------------------------------|--------------|------------|-----|
| An12g10130 | -4  | 609  | Domain(s) with predicted amino acid transmembrane transporter activity, role in amino acid transmembrane transport and membrane localization                                                                               | prot_ID_836  | An12g10130 |     |
| An12g10140 | -5  | 108  | Glycolate oxidase                                                                                                                                                                                                          | prot_ID_386  | An12g10140 |     |
| An12g10150 | -6  | 365  | Domain(s) with predicted oxidoreductase activity and role in oxidation-reduction process                                                                                                                                   | prot_ID_786  | An12g10150 |     |
| An12g10160 | -7  | 486  | Domain(s) with predicted transferase activity, transferring glycosyl groups activity and membrane localization                                                                                                             | prot_ID_470  | An12g10160 | ECS |
| An12g10170 | -8  | 175  | Protein of unknown function<br>Ortholog of A. nidulans FGSC A4 : AN5465, AN2186, AN10116, A. fumigatus Af293 : Afu1g13980, Afu5g02460 and A. niger CBS 513.88 : An08g07120, An02g10330, An12g09760, An07g05030, An05g02480 | prot_ID_227  | An12g10170 |     |
| An12g10180 | -9  | 1600 | Domain(s) with predicted role in transmembrane transport and integral to membrane localization                                                                                                                             | prot_ID_1053 | An12g10180 |     |
| An12g10190 | -10 | 1812 | Putative cell wall protein with internal repeats; induced by caspofungin                                                                                                                                                   | prot_ID_679  | An12g10190 |     |
| An12g10200 | -11 | 1193 |                                                                                                                                                                                                                            | n/a          | An12g10200 |     |
| An12g10210 | -12 | 1000 |                                                                                                                                                                                                                            | n/a          | An12g10210 |     |
| An12g10220 | -13 | 869  |                                                                                                                                                                                                                            | n/a          | An12g10220 |     |



## An12g10860 cluster

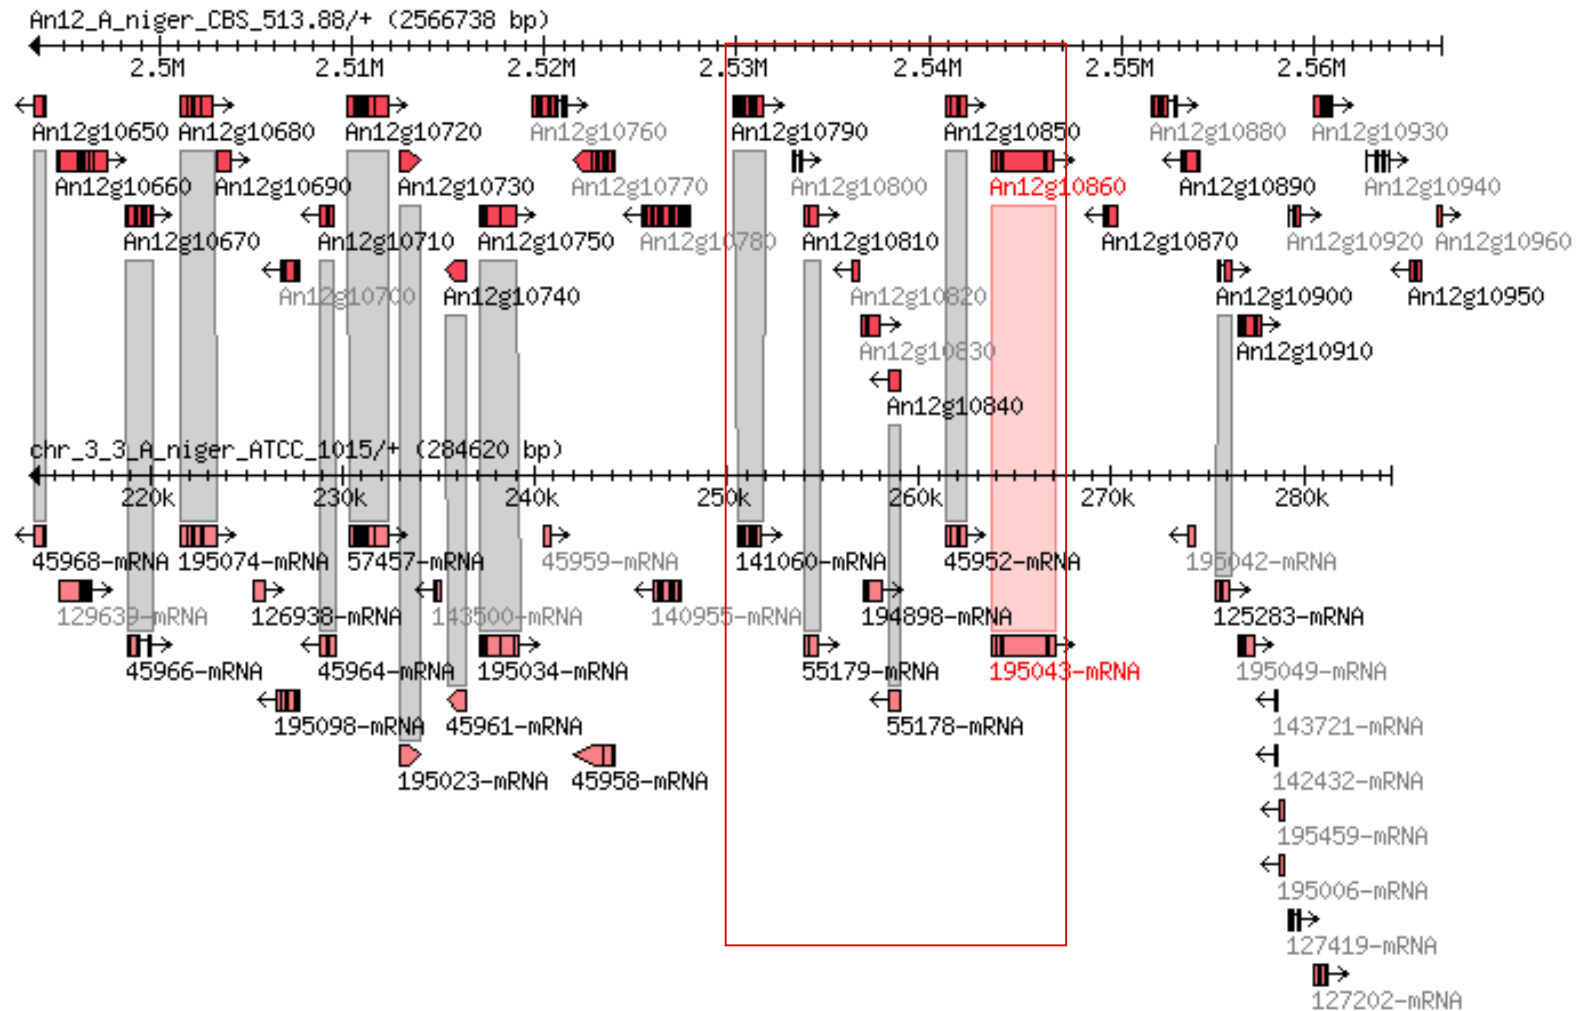

**An12g10860 cluster**

| Gene id (SMURF)   | Gene positions | Gene distance | AspGD name | AspGD description line or supplemental annotation                                                                                                                                                                            | protein ID (antiSMASH) | AspGD ID          |     |
|-------------------|----------------|---------------|------------|------------------------------------------------------------------------------------------------------------------------------------------------------------------------------------------------------------------------------|------------------------|-------------------|-----|
| n/a               |                |               |            | Domain(s) with predicted choline dehydrogenase activity, flavin adenine dinucleotide binding activity and role in alcohol metabolic process, oxidation-reduction process                                                     | prot_ID_918            | An12g10770        |     |
| n/a               |                |               |            | Protein of unknown function                                                                                                                                                                                                  | prot_ID_880            | An12g10780        |     |
| n/a               |                |               |            | Domain(s) with predicted peroxidase activity                                                                                                                                                                                 | prot_ID_671            | An12g10790        | ECS |
| n/a               |                |               |            | Protein of unknown function<br>Ortholog of <i>A. brasiliensis</i> : Aspbr1_0210236, <i>A. acidus</i> : Aspfo1_0060989, <i>A. niger</i> ATCC 1015 : 55179-mRNA and <i>Aspergillus carbonarius</i> ITEM 5010 : Acar5010_208649 | prot_ID_45             | An12g10800        |     |
| n/a               |                |               |            | Protein of unknown function                                                                                                                                                                                                  | prot_ID_870            | An12g10810        |     |
| n/a               |                |               |            | Protein of unknown function                                                                                                                                                                                                  | prot_ID_449            | An12g10820        |     |
| n/a               |                |               |            | Protein of unknown function                                                                                                                                                                                                  | prot_ID_265            | An12g10830        |     |
| An12g10840        | 2              | 2392          |            | Ortholog of <i>A. acidus</i> : Aspfo1_0211322 and <i>A. niger</i> ATCC 1015 : 55178-mRNA                                                                                                                                     | prot_ID_765            | An12g10840        |     |
| An12g10850        | 1              | 1301          |            | Domain(s) with predicted carbon-carbon lyase activity and role in cellular aromatic compound metabolic process                                                                                                               | prot_ID_488            | An12g10850        |     |
| <b>An12g10860</b> | 0              | 0             |            | Protein similar to nonribosomal peptide synthases (NRPS-like)                                                                                                                                                                | <b>prot_ID_372</b>     | <b>An12g10860</b> | ECS |
| An12g10870        | -1             | 2502          |            | Domain(s) with predicted N-acetyltransferase activity and role in metabolic process                                                                                                                                          | prot_ID_594            | An12g10870        |     |
| n/a               |                |               |            | Protein of unknown function                                                                                                                                                                                                  | prot_ID_915            | An12g10880        |     |
| n/a               |                |               |            | Domain(s) with predicted nucleotide binding, oxidoreductase activity, zinc ion binding activity and role in oxidation-reduction process                                                                                      | prot_ID_454            | An12g10890        |     |
| n/a               |                |               |            | Domain(s) with predicted nucleotide binding, oxidoreductase activity and role in oxidation-reduction process                                                                                                                 | prot_ID_275            | An12g10900        |     |
| n/a               |                |               |            | Domain(s) with predicted nucleotide binding, oxidoreductase activity, zinc ion binding activity and role in oxidation-reduction process                                                                                      | prot_ID_708            | An12g10910        |     |
| n/a               |                |               |            | Protein of unknown function                                                                                                                                                                                                  | prot_ID_787            | An12g10920        |     |
| n/a               |                |               |            | Domain(s) with predicted nucleotide binding activity                                                                                                                                                                         | prot_ID_58             | An12g10930        |     |
| n/a               |                |               |            | otein of unknown function                                                                                                                                                                                                    | prot_ID_543            | An12g10940        |     |
| n/a               |                |               |            | Domain(s) with predicted RNA binding, endoribonuclease activity                                                                                                                                                              | prot_ID_757            | An12g10950        |     |
| n/a               |                |               |            | Protein of unknown function                                                                                                                                                                                                  | prot_ID_290            | An12g10960        |     |

# An13g01840 cluster

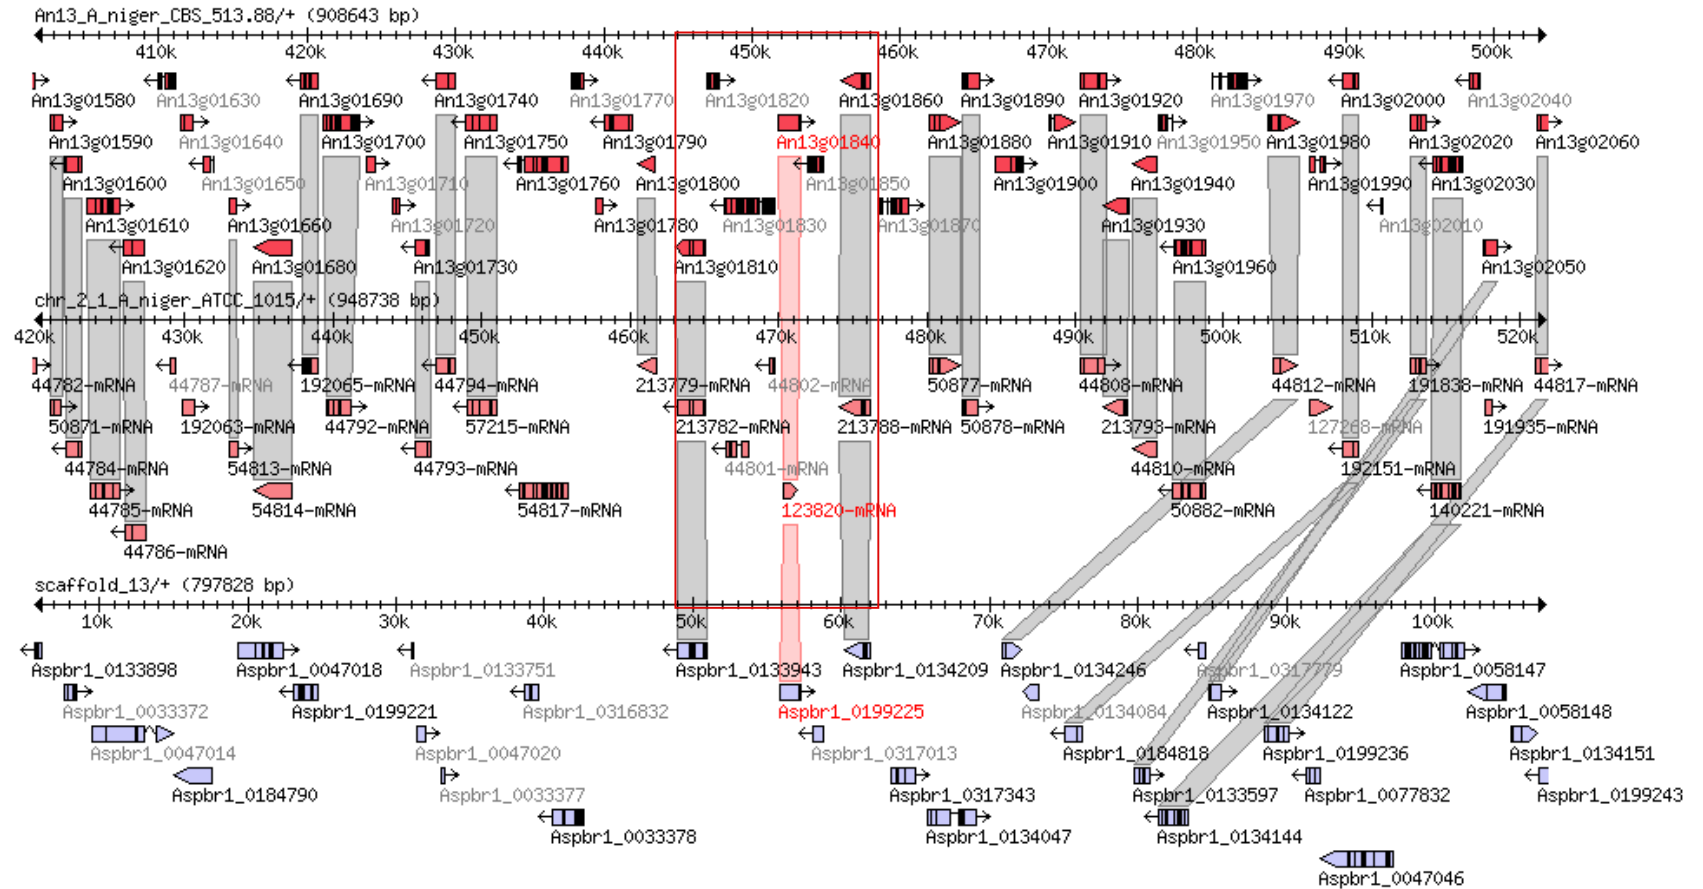

**An13g01840 cluster**

| Gene id (SMURF)   | Gene positions | Gene distance | AspGD name | AspGD description line or supplemental annotation                                                                                                                                    | protein ID (antiSMASH) | AspGD ID          |     |
|-------------------|----------------|---------------|------------|--------------------------------------------------------------------------------------------------------------------------------------------------------------------------------------|------------------------|-------------------|-----|
| n/a               |                |               |            | Ortholog of A. nidulans FGSC A4 : AN9192, A. fumigatus Af293 : Afu3g03910, A. oryzae RIB40 : AO090038000138, N. fischeri NRRL 181 : NFIA_006190 and A. clavatus NRRL 1 : ACLA_060900 | prot_ID_88             | An13g01790        |     |
| n/a               |                |               |            | Ortholog of A. fumigatus Af293 : Afu5g00590, A. niger CBS 513.88 : An15g07140, A. versicolor : Aspve1_0046767 and A. sydowii : Aspsy1_0029982, Aspsy1_0040096                        | prot_ID_220            | An13g01800        |     |
| n/a               |                |               |            | Ortholog(s) have monooxygenase activity and role in sterigmatocystin biosynthetic process                                                                                            | prot_ID_249            | An13g01810        | ECS |
| An13g01820        | 2              | 251           |            | Protein of unknown function                                                                                                                                                          | prot_ID_387            | An13g01820        |     |
| An13g01830        | 1              | 290           |            | Protein of unknown function                                                                                                                                                          | prot_ID_3              | An13g01830        |     |
| <b>An13g01840</b> | 0              | 0             |            | Putative dimethylallyl tryptophan synthase (DMAT)                                                                                                                                    | <b>prot_ID_126</b>     | <b>An13g01840</b> |     |
| An13g01850        | -1             | 481           |            | Protein of unknown function                                                                                                                                                          | prot_ID_350            | An13g01850        |     |
| An13g01860        | -2             | 1045          |            | Domain(s) with predicted amino acid transmembrane transporter activity, role in amino acid transmembrane transport and membrane localization                                         | prot_ID_241            | An13g01860        | ECS |
| n/a               |                |               |            | Protein of unknown function                                                                                                                                                          | prot_ID_388            | An13g01870        |     |
| n/a               |                |               |            | Triacylglycerol lipase                                                                                                                                                               | prot_ID_347            | An13g01880        |     |

# An13g02430 cluster

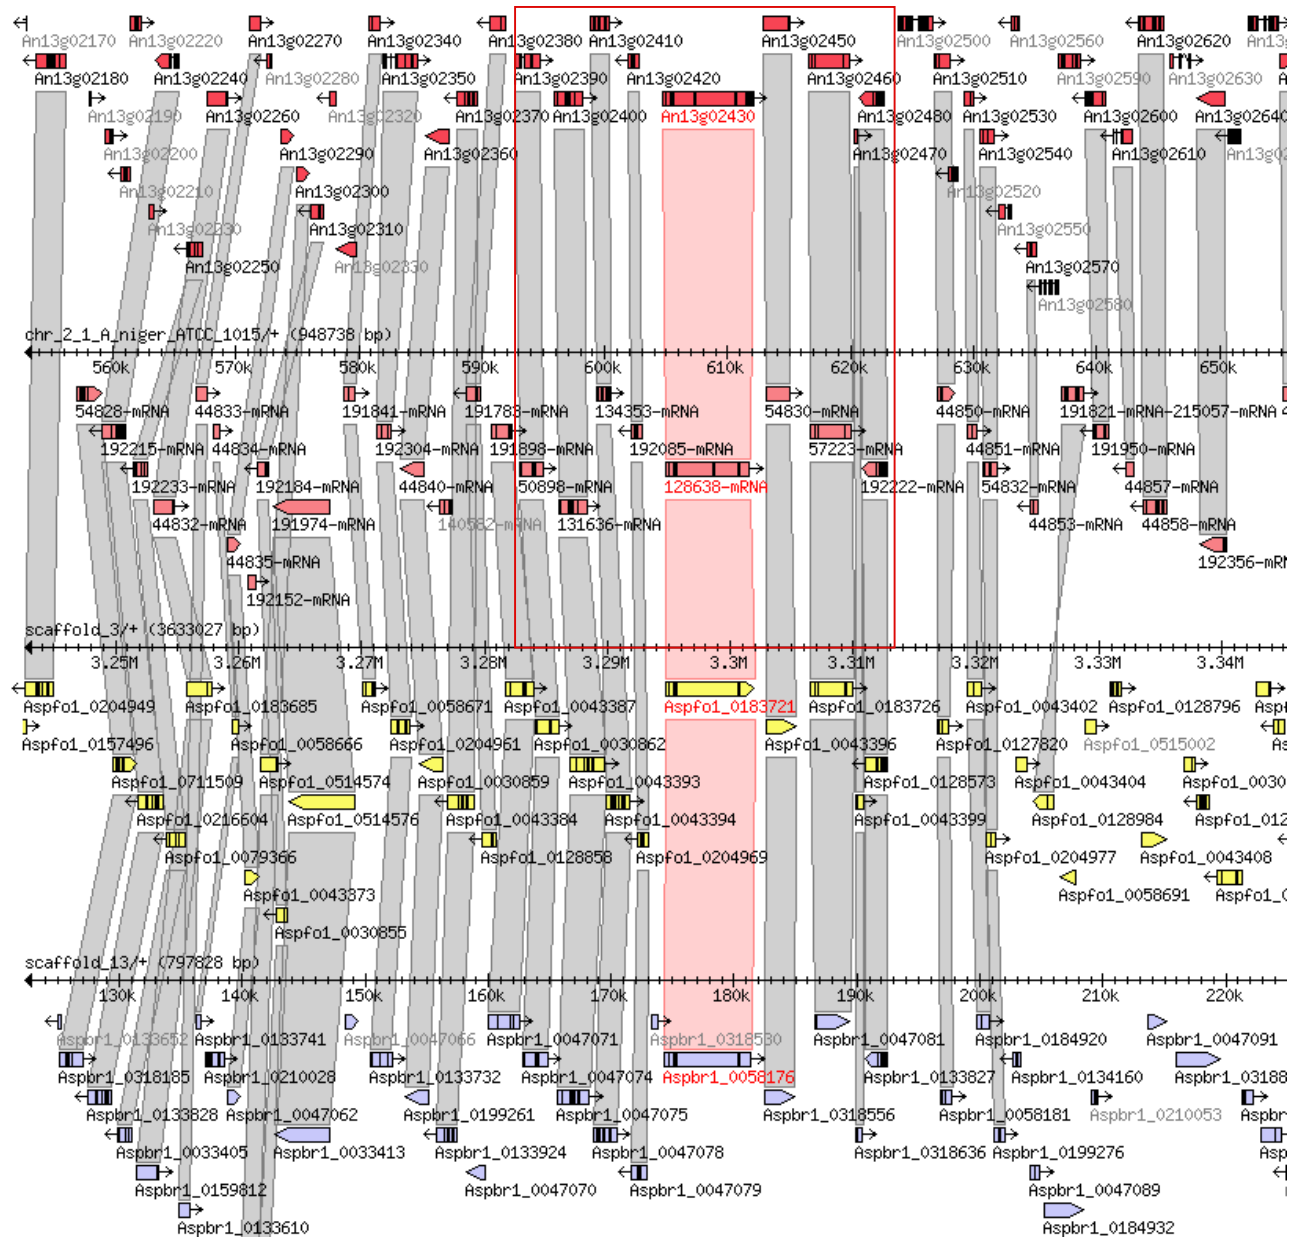

**An13g02430 cluster**

| Gene id (SMURF) | Gene positions | Gene distance | AspGD name | AspGD description line or supplemental annotation                                                                                                                                                                                                                                                                                                                                              | protein ID (antiSMASH) | AspGD ID   |     |
|-----------------|----------------|---------------|------------|------------------------------------------------------------------------------------------------------------------------------------------------------------------------------------------------------------------------------------------------------------------------------------------------------------------------------------------------------------------------------------------------|------------------------|------------|-----|
| An13g02290      | 14             | 276           |            | Ortholog of A. nidulans FGSC A4 : AN2478, A. fumigatus Af293 : Afu6g00240, A. oryzae RIB40 : AO090103000492, A. niger ATCC 1015 : 44835-mRNA and A. versicolor : Aspve1_0140550, Aspve1_0200467 Domain(s) with predicted sequence-specific DNA binding RNA polymerase II transcription factor activity, sequence-specific DNA binding transcription factor activity, zinc ion binding activity | n/a                    | An13g02290 |     |
| An13g02300      | 13             | 157           |            | Ribitol dehydrogenase                                                                                                                                                                                                                                                                                                                                                                          | n/a                    | An13g02300 |     |
| An13g02310      | 12             | 564           |            | Vacuolar glutathione S-conjugate ABC transporter Domain(s) with predicted ATP binding, ATPase activity, coupled to transmembrane movement of substances activity, role in transmembrane transport and integral to membrane localization                                                                                                                                                        | n/a                    | An13g02320 |     |
| An13g02320      | 11             | 104           |            |                                                                                                                                                                                                                                                                                                                                                                                                |                        |            |     |
| An13g02330      | 10             | 1006          |            | Domain(s) with predicted nucleotide binding, oxidoreductase activity and role in metabolic process                                                                                                                                                                                                                                                                                             | n/a                    | An13g02340 |     |
| An13g02340      | 9              | 178           |            | Domain(s) with predicted transporter activity, role in transmembrane transport, water transport and integral to membrane localization                                                                                                                                                                                                                                                          | n/a                    | An13g02350 |     |
| An13g02350      | 8              | 633           |            | Ortholog of A. brasiliensis : Aspbr1_0199261, A. acidus : Aspfo1_0030859 and A. niger ATCC 1015 : 44840-mRNA Domain(s) with predicted nucleic acid binding, zinc ion binding activity                                                                                                                                                                                                          | prot_ID_281            | An13g02350 |     |
| An13g02360      | 7              | 634           |            | Ortholog of A. nidulans FGSC A4 : AN8523, A. fumigatus Af293 : Afu5g09810, A. niger ATCC 1015 : 191783-mRNA, A. versicolor : Aspve1_0046869 and A. sydowii : Aspsy1_0049687                                                                                                                                                                                                                    | prot_ID_130            | An13g02360 |     |
| An13g02370      | 6              | 1094          |            |                                                                                                                                                                                                                                                                                                                                                                                                | prot_ID_65             | An13g02370 |     |
| An13g02380      | 5              | 847           |            |                                                                                                                                                                                                                                                                                                                                                                                                | prot_ID_227            | An13g02380 |     |
| An13g02390      | 4              | 1217          |            | Ortholog(s) have purine nucleobase transmembrane transporter activity, role in hypoxanthine transport and fungal-type vacuole, plasma membrane localization Domain(s) with predicted sequence-specific DNA binding RNA polymerase II transcription factor activity, sequence-specific DNA binding transcription factor activity, zinc ion binding activity                                     | prot_ID_269            | An13g02390 | ECS |
| An13g02400      | 3              | 792           |            | Domain(s) with predicted metal ion transmembrane transporter activity, role in metal ion transport, transmembrane transport and membrane localization                                                                                                                                                                                                                                          | prot_ID_373            | An13g02400 |     |
| An13g02410      | 2              | 1574          |            | Ortholog of A. brasiliensis : Aspbr1_0047079, Aspergillus flavus NRRL 3357 : AFL2T_11105, A. acidus : Aspfo1_0204969 and Aspergillus terreus NIH2624 :                                                                                                                                                                                                                                         | prot_ID_369            | An13g02410 |     |
| An13g02420      | 1              | 1838          |            |                                                                                                                                                                                                                                                                                                                                                                                                | prot_ID_79             | An13g02420 |     |

ATET\_07066

|                   |    |      |      |                                                                                                                                                                                                                                                             |                    |                   |     |
|-------------------|----|------|------|-------------------------------------------------------------------------------------------------------------------------------------------------------------------------------------------------------------------------------------------------------------|--------------------|-------------------|-----|
| <b>An13g02430</b> | 0  | 0    |      | Multifunctional polyketide synthase; ortholog(s) have role in asperfuranone biosynthetic process, emericellamide biosynthetic process, monodictyphenone biosynthetic process, o-orsellinic acid biosynthetic process, sterigmatocystin biosynthetic process | <b>prot_ID_311</b> | <b>An13g02430</b> |     |
| An13g02450        | -1 | 720  |      | Domain(s) with predicted catalytic activity                                                                                                                                                                                                                 | prot_ID_120        | An13g02450        |     |
| An13g02460        | -2 | 1303 |      | Domain(s) with predicted ACP phosphopantetheine attachment site binding involved in fatty acid biosynthetic process, catalytic activity, nucleotide binding, phosphopantetheine binding activity                                                            | prot_ID_255        | An13g02460        |     |
| An13g02470        | -3 | 428  |      | Ortholog of <i>A. brasiliensis</i> : Aspbr1_0318636, <i>A. acidus</i> : Aspfo1_0043399, <i>Aspergillus carbonarius</i> ITEM 5010 : Acar5010_157459 and <i>Aspergillus aculeatus</i> ATCC16872 : Aacu16872_043764                                            | prot_ID_193        | An13g02470        | ECS |
| An13g02480        | -4 | 183  |      | Domain(s) with predicted oxidoreductase activity and role in oxidation-reduction process                                                                                                                                                                    | prot_ID_78         | An13g02480        |     |
| An13g02500        | -5 | 1158 |      |                                                                                                                                                                                                                                                             | prot_ID_323        | An13g02500        |     |
| An13g02510        | -6 | 167  | crhE | Glycosylphosphatidylinositol-anchored chitin transglycosidase                                                                                                                                                                                               | prot_ID_32         | An13g02510        |     |
| An13g02520        | -7 | 143  |      |                                                                                                                                                                                                                                                             | prot_ID_375        | An13g02520        |     |
| An13g02530        | -8 | 541  |      | Domain(s) with predicted carbonate dehydratase activity, zinc ion binding activity and role in one-carbon metabolic process                                                                                                                                 | prot_ID_372        | An13g02530        |     |
| An13g02540        | -9 | 693  |      | Ortholog of <i>A. fumigatus</i> Af293 : Afu2g17300, <i>A. brasiliensis</i> : Aspbr1_0199276, <i>N. fischeri</i> NRRL 181 : NFIA_092700, <i>A. acidus</i> : Aspfo1_0204977 and <i>A. fumigatus</i> A1163 : AFUB_032950                                       | prot_ID_170        | An13g02540        |     |
| n/a               |    |      |      |                                                                                                                                                                                                                                                             | prot_ID_304        | An13g02550        |     |
| n/a               |    |      |      |                                                                                                                                                                                                                                                             | prot_ID_150        | An13g02560        |     |
| n/a               |    |      |      | Ortholog of <i>A. brasiliensis</i> : Aspbr1_0056198, <i>A. acidus</i> : Aspfo1_0074073, <i>A. niger</i> ATCC 1015 : 44853-mRNA and <i>Aspergillus carbonarius</i> ITEM 5010 : Acar5010_133941                                                               | prot_ID_234        | An13g02570        |     |
| n/a               |    |      |      |                                                                                                                                                                                                                                                             | prot_ID_62         | An13g02580        |     |
| n/a               |    |      |      | Domain(s) with predicted transmembrane transporter activity, role in transmembrane transport and integral to membrane localization                                                                                                                          | prot_ID_81         | An13g02590        |     |
| n/a               |    |      |      | Domain(s) with predicted oxidoreductase activity and role in oxidation-reduction process                                                                                                                                                                    | prot_ID_94         | An13g02600        |     |

# An13g02460 cluster

Overlaps An13g02430 cluster

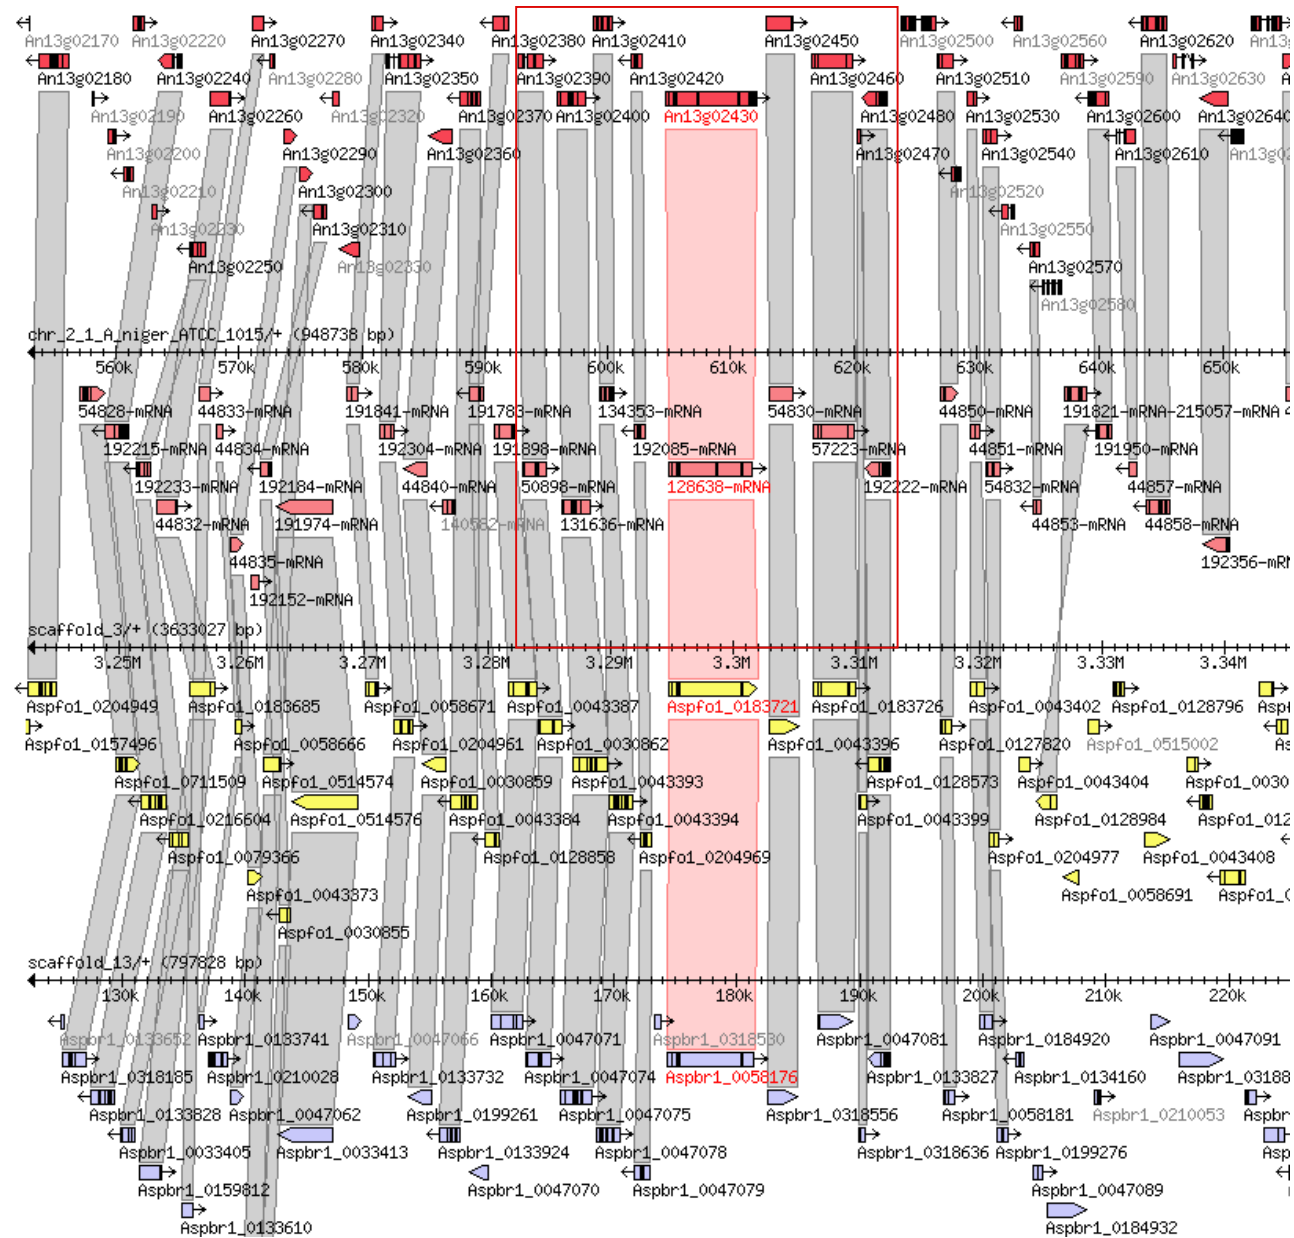



**An13g02460 cluster**

| Gene id (SMURF)   | Gene positions | Gene distance | AspGD name | AspGD description line or supplemental annotation                                                                                                                                                                      | prot_ID            | AspGD ID          |     |
|-------------------|----------------|---------------|------------|------------------------------------------------------------------------------------------------------------------------------------------------------------------------------------------------------------------------|--------------------|-------------------|-----|
| n/a               |                |               |            | Ortholog(s) have purine nucleobase transmembrane transporter activity, role in hypoxanthine transport and fungal-type vacuole, plasma membrane localization                                                            | prot_ID_269        | An13g02390        | ECS |
| An13g02400        | 5              | 792           |            | Domain(s) with predicted sequence-specific DNA binding RNA polymerase II transcription factor activity, sequence-specific DNA binding transcription factor activity, zinc ion binding activity                         | prot_ID_373        | An13g02400        |     |
| An13g02410        | 4              | 1574          |            | Domain(s) with predicted metal ion transmembrane transporter activity, role in metal ion transport, transmembrane transport and membrane localization                                                                  | prot_ID_369        | An13g02410        |     |
| An13g02420        | 3              | 1838          |            | Ortholog of A. brasiliensis : Aspbr1_0047079, Aspergillus flavus NRRL 3357 : AFL2T_11105, A. acidus : Aspfo1_0204969 and Aspergillus terreus NIH2624 : ATET_07066                                                      | prot_ID_79         | An13g02420        |     |
| An13g02430        | 2              | 720           |            | Ortholog(s) have role in asperfuranone biosynthetic process, emericellamide biosynthetic process, monodictyphenone biosynthetic process, o-orsellinic acid biosynthetic process, sterigmatocystin biosynthetic process | <b>prot_ID_311</b> | <b>An13g02430</b> |     |
| An13g02450        | 1              | 1303          |            | Domain(s) with predicted catalytic activity                                                                                                                                                                            | prot_ID_120        | An13g02450        |     |
| <b>An13g02460</b> | 0              | 0             |            | Domain(s) with predicted ACP phosphopantetheine attachment site binding involved in fatty acid biosynthetic process, catalytic activity, nucleotide binding, phosphopantetheine binding activity                       | prot_ID_255        | An13g02460        |     |
| An13g02470        | -1             | 428           |            | Ortholog of A. brasiliensis : Aspbr1_0318636, A. acidus : Aspfo1_0043399, Aspergillus carbonarius ITEM 5010 : Acar5010_157459 and Aspergillus aculeatus ATCC16872 : Aacu16872_043764                                   | prot_ID_193        | An13g02470        |     |
| An13g02480        | -2             | 183           |            | Domain(s) with predicted oxidoreductase activity and role in oxidation-reduction process                                                                                                                               | prot_ID_78         | An13g02480        | ECS |
| An13g02500        | -3             | 1158          |            |                                                                                                                                                                                                                        | prot_ID_323        | An13g02500        |     |
| An13g02510        | -4             | 167           | crhE       | Glycosylphosphatidylinositol-anchored chitin transglycosidase                                                                                                                                                          | prot_ID_32         | An13g02510        |     |
| An13g02520        | -5             | 143           |            |                                                                                                                                                                                                                        | prot_ID_375        | An13g02520        |     |
| An13g02530        | -6             | 541           |            | Domain(s) with predicted carbonate dehydratase activity, zinc ion binding activity and role in one-carbon metabolic process                                                                                            | prot_ID_372        | An13g02530        |     |
| An13g02540        | -7             | 693           |            | Ortholog of A. fumigatus Af293 : Afu2g17300, A. brasiliensis : Aspbr1_0199276, N. fischeri NRRL 181 : NFIA_092700, A. acidus : Aspfo1_0204977 and A. fumigatus A1163 : AFUB_032950                                     | prot_ID_170        | An13g02540        | ECS |

# An13g02960 cluster

No manual prediction made

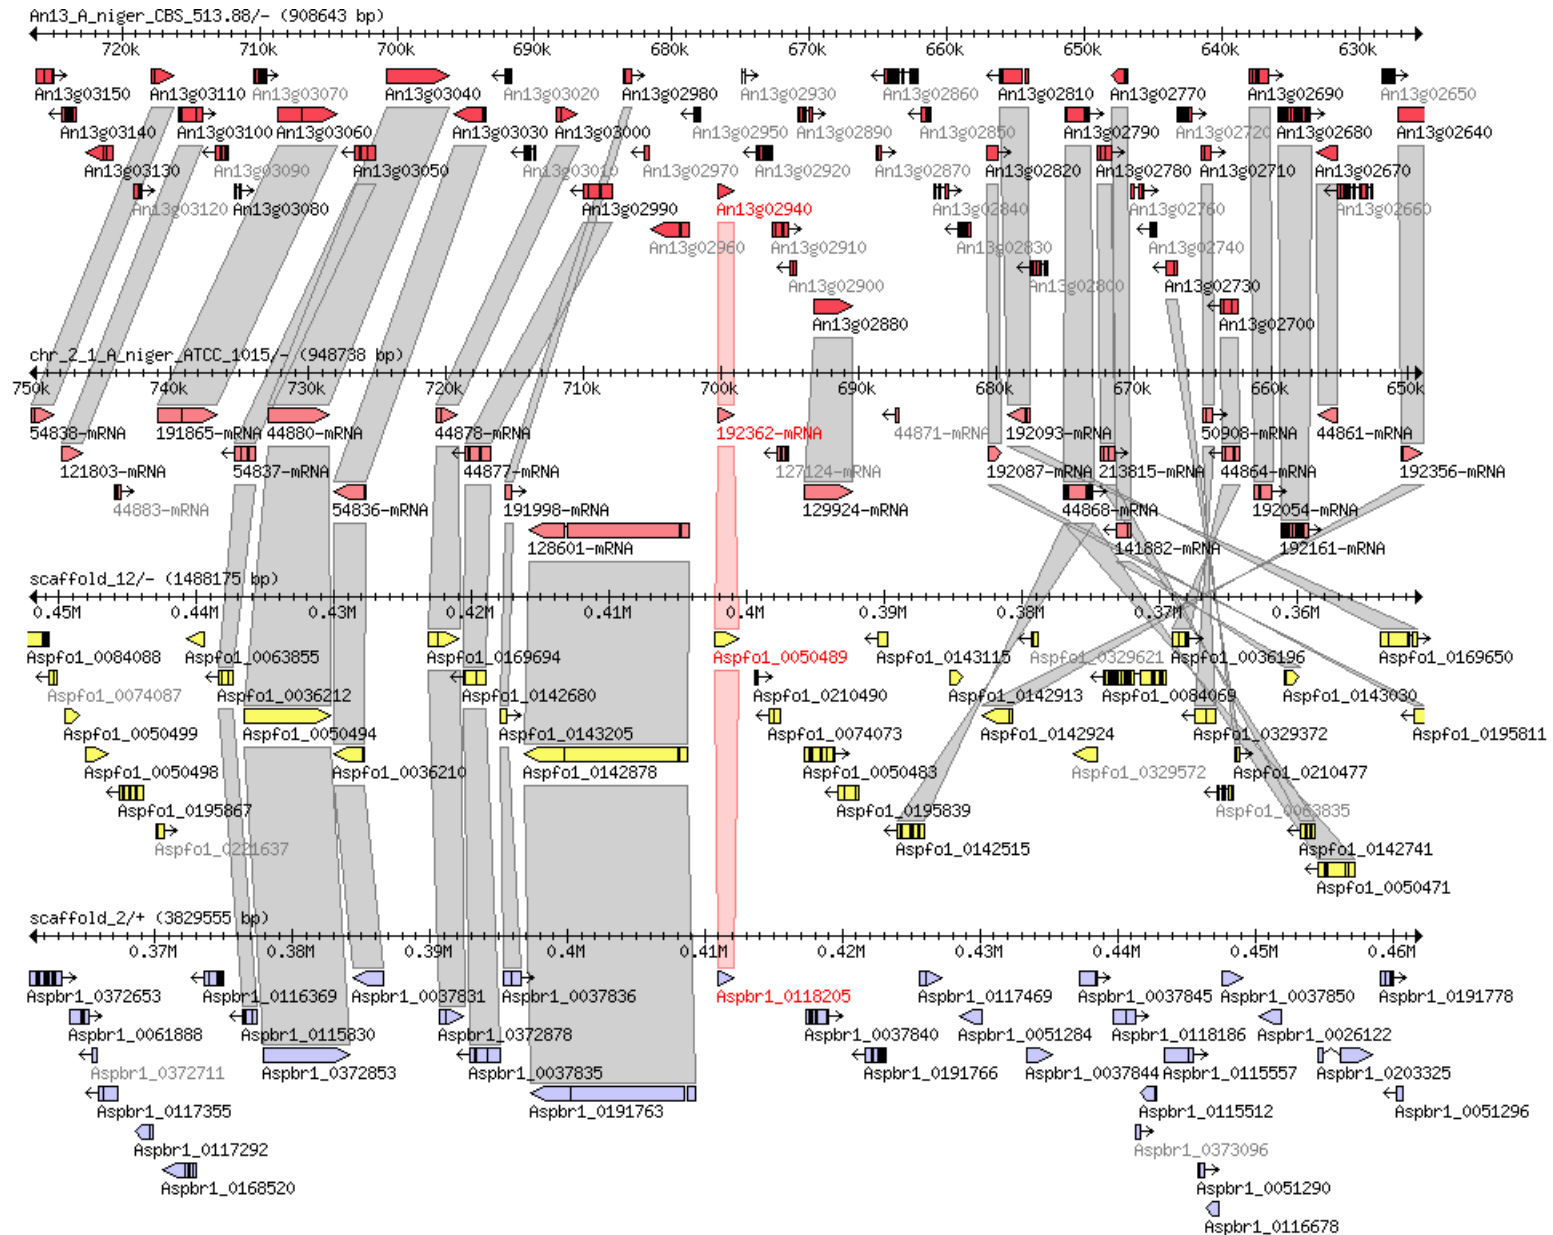

**An13g02960 cluster**

| Gene id (SMURF)   | Gene positions | Gene distance | AspGD name | AspGD description line or supplemental annotation                                                                                                                                                            | protein ID (antiSMASH) | AspGD ID          |
|-------------------|----------------|---------------|------------|--------------------------------------------------------------------------------------------------------------------------------------------------------------------------------------------------------------|------------------------|-------------------|
| n/a               |                |               |            | Protein of unknown function                                                                                                                                                                                  | prot_ID_185            | An13g02830        |
| n/a               |                |               |            | Protein of unknown function                                                                                                                                                                                  | prot_ID_368            | An13g02840        |
| n/a               |                |               |            | Protein of unknown function                                                                                                                                                                                  | prot_ID_179            | An13g02850        |
| n/a               |                |               |            | Protein of unknown function                                                                                                                                                                                  | prot_ID_270            | An13g02860        |
| n/a               |                |               |            | Protein of unknown function                                                                                                                                                                                  | prot_ID_284            | An13g02870        |
| n/a               |                |               |            | Ortholog of <i>A. nidulans</i> FGSC A4 : AN3479, AN8495, <i>A. fumigatus</i> Af293 : Afu3g01440, Afu4g03340, Afu5g07620, <i>A. oryzae</i> RIB40 : AO090009000050 and <i>A. niger</i> ATCC 1015 : 129924-mRNA | prot_ID_100            | An13g02880        |
| n/a               |                |               |            | Protein of unknown function                                                                                                                                                                                  | prot_ID_240            | An13g02890        |
| n/a               |                |               |            | Protein of unknown function                                                                                                                                                                                  | prot_ID_338            | An13g02900        |
| n/a               |                |               |            | Protein of unknown function                                                                                                                                                                                  | prot_ID_27             | An13g02910        |
| n/a               |                |               |            | Protein of unknown function                                                                                                                                                                                  | prot_ID_154            | An13g02920        |
| n/a               |                |               |            | Protein of unknown function                                                                                                                                                                                  | prot_ID_102            | An13g02930        |
| An13g02940        | 2              | 1329          |            | Putative enoyl reductase                                                                                                                                                                                     | prot_ID_253            | An13g02940        |
| An13g02950        | 1              | 357           |            | Protein of unknown function                                                                                                                                                                                  | prot_ID_176            | An13g02950        |
| <b>An13g02960</b> | 0              | 0             |            | Domain(s) with predicted transferase activity and role in biosynthetic process                                                                                                                               | <b>prot_ID_2</b>       | <b>An13g02960</b> |
| An13g02970        | -1             | 104           |            | Protein of unknown function                                                                                                                                                                                  | prot_ID_291            | An13g02970        |
| An13g02980        | -2             | 889           |            | Ortholog of <i>A. brasiliensis</i> : Aspbr1_0037836, <i>A. acidus</i> : Aspfo1_0143205, <i>A. versicolor</i> : Aspve1_0495831 and <i>A. niger</i> ATCC 1015 : 191998-mRNA                                    | prot_ID_331            | An13g02980        |
| An13g02990        | -3             | 1045          |            | Ortholog of <i>A. brasiliensis</i> : Aspbr1_0037835, <i>A. acidus</i> : Aspfo1_0142680 and <i>A. niger</i> ATCC 1015 : 44877-mRNA                                                                            | prot_ID_266            | An13g02990        |
| An13g03000        | -4             | 566           |            | Domain(s) with predicted electron carrier activity, heme binding, iron ion binding, oxidoreductase activity, acting on paired donors and with incorporation or reduction of molecular oxygen, more           | prot_ID_144            | An13g03000        |
| An13g03010        | -5             | 1453          |            | Protein of unknown function                                                                                                                                                                                  | prot_ID_379            | An13g03010        |
| An13g03020        | -6             | 935           |            | Protein of unknown function                                                                                                                                                                                  | prot_ID_327            | An13g03020        |
| An13g03030        | -7             | 1377          |            | Domain(s) with predicted sequence-specific DNA binding RNA polymerase II transcription factor activity, sequence-specific DNA binding transcription factor activity, zinc ion binding activity               | prot_ID_183            | An13g03030        |
| An13g03040        | -8             | 612           |            | Domain(s) with predicted ACP phosphopantetheine attachment site binding involved in fatty acid biosynthetic process, ligase                                                                                  | prot_ID_167            | An13g03040        |

activity

|            |     |      |                                                                                                                                                                                      |             |            |
|------------|-----|------|--------------------------------------------------------------------------------------------------------------------------------------------------------------------------------------|-------------|------------|
| An13g03050 | -9  | 1215 | Ortholog of A. nidulans FGSC A4 : AN9209, A. fumigatus Af293 : Afu8g01840, Afu3g02685, A. oryzae RIB40 : AO090012000290 and A. niger ATCC 1015 : 190297-mRNA, 42320-mRNA, 54837-mRNA | prot_ID_23  | An13g03050 |
| An13g03060 | -10 | 1546 | Ortholog(s) have role in drug transmembrane transport                                                                                                                                | prot_ID_212 | An13g03060 |
| An13g03070 | -11 | 676  | Protein of unknown function                                                                                                                                                          | prot_ID_221 | An13g03070 |
| An13g03080 | -12 | 963  | Ortholog of A. nidulans FGSC A4 : AN8503, A. brasiliensis : Aspbr1_0044529, Aspergillus flavus NRRL 3357 : AFL2T_10601 and A. acidus : Aspfo1_0328979                                | prot_ID_168 | An13g03080 |
| An13g03090 | -13 | 436  | Protein of unknown function                                                                                                                                                          | prot_ID_290 | An13g03090 |
| n/a        |     |      | Domain(s) with predicted potassium channel activity, role in potassium ion transmembrane transport and membrane localization                                                         | prot_ID_107 | An13g03100 |
| n/a        |     |      | Domain(s) with predicted role in transmembrane transport and integral to membrane localization                                                                                       | prot_ID_283 | An13g03110 |
| n/a        |     |      | Protein of unknown function                                                                                                                                                          | prot_ID_145 | An13g03120 |

# An13g03040 cluster

Overlaps with An13g02960 cluster , no manual prediction made

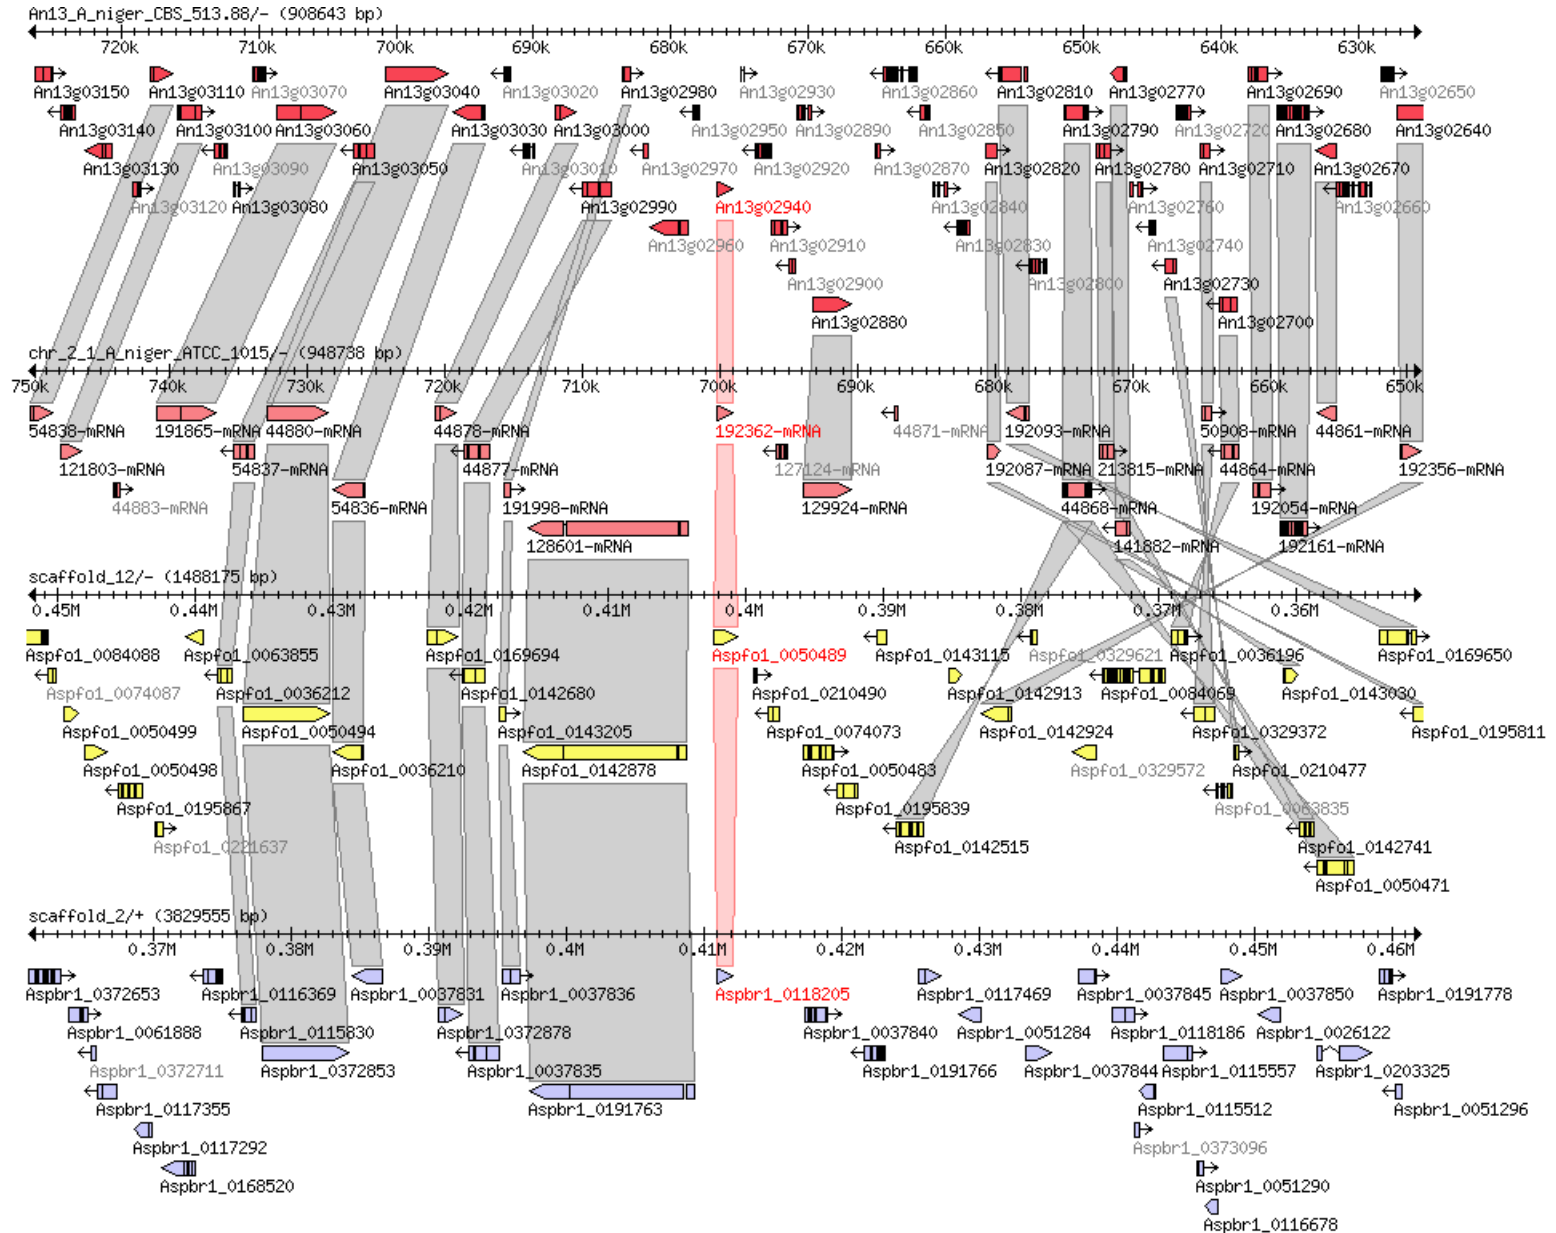

**An13g03040 cluster**

| Gene id (SMURF)   | Gene positions | Gene distance | AspGD name | AspGD description line or supplemental annotation                                                                                                                                                                                                                                                                  | protein ID (antiSMASH) | AspGD ID          |
|-------------------|----------------|---------------|------------|--------------------------------------------------------------------------------------------------------------------------------------------------------------------------------------------------------------------------------------------------------------------------------------------------------------------|------------------------|-------------------|
| An13g02940        | 10             | 1329          |            | Putative enoyl reductase                                                                                                                                                                                                                                                                                           | prot_ID_253            | An13g02940        |
| An13g02950        | 9              | 357           |            |                                                                                                                                                                                                                                                                                                                    | prot_ID_176            | An13g02950        |
| An13g02960        | 8              | 104           |            | Domain(s) with predicted transferase activity and role in biosynthetic process                                                                                                                                                                                                                                     | <b>prot_ID_2</b>       | <b>An13g02960</b> |
| An13g02970        | 7              | 889           |            |                                                                                                                                                                                                                                                                                                                    | prot_ID_291            | An13g02970        |
| An13g02980        | 6              | 1045          |            | Ortholog of A. brasiliensis : Aspbr1_0037836, A. acidus : Aspfo1_0143205, A. versicolor : Aspve1_0495831 and A. niger ATCC 1015 : 191998-mRNA                                                                                                                                                                      | prot_ID_331            | An13g02980        |
| An13g02990        | 5              | 566           |            | Ortholog of A. brasiliensis : Aspbr1_0037835, A. acidus : Aspfo1_0142680 and A. niger ATCC 1015 : 44877-mRNA<br>Domain(s) with predicted electron carrier activity, heme binding, iron ion binding, oxidoreductase activity, acting on paired donors and with incorporation or reduction of molecular oxygen, more | prot_ID_266            | An13g02990        |
| An13g03000        | 4              | 1453          |            |                                                                                                                                                                                                                                                                                                                    | prot_ID_144            | An13g03000        |
| An13g03010        | 3              | 935           |            |                                                                                                                                                                                                                                                                                                                    | prot_ID_379            | An13g03010        |
| An13g03020        | 2              | 1377          |            |                                                                                                                                                                                                                                                                                                                    | prot_ID_327            | An13g03020        |
| An13g03030        | 1              | 612           |            | Domain(s) with predicted sequence-specific DNA binding RNA polymerase II transcription factor activity, sequence-specific DNA binding transcription factor activity, zinc ion binding activity                                                                                                                     | prot_ID_183            | An13g03030        |
| <b>An13g03040</b> | 0              | 0             |            | Domain(s) with predicted ACP phosphopantetheine attachment site binding involved in fatty acid biosynthetic process, ligase activity                                                                                                                                                                               | prot_ID_167            | An13g03040        |
| An13g03050        | -1             | 1215          |            | Ortholog of A. nidulans FGSC A4 : AN9209, A. fumigatus Af293 : Afu8g01840, Afu3g02685, A. oryzae RIB40 : AO090012000290 and A. niger ATCC 1015 : 190297-mRNA, 42320-mRNA, 54837-mRNA                                                                                                                               | prot_ID_23             | An13g03050        |
| An13g03060        | -2             | 1546          |            | Ortholog(s) have role in drug transmembrane transport                                                                                                                                                                                                                                                              | prot_ID_212            | An13g03060        |
| An13g03070        | -3             | 676           |            |                                                                                                                                                                                                                                                                                                                    | prot_ID_221            | An13g03070        |
| An13g03080        | -4             | 963           |            | Ortholog of A. nidulans FGSC A4 : AN8503, A. brasiliensis : Aspbr1_0044529, Aspergillus flavus NRRL 3357 : AFL2T_10601 and A. acidus : Aspfo1_0328979                                                                                                                                                              | prot_ID_168            | An13g03080        |
| An13g03090        | -5             | 436           |            |                                                                                                                                                                                                                                                                                                                    | prot_ID_290            | An13g03090        |
| An13g03100        | -6             | 952           |            | Domain(s) with predicted potassium channel activity, role in potassium ion transmembrane transport and membrane localization                                                                                                                                                                                       | prot_ID_107            | An13g03100        |
| An13g03110        | -7             | 375           |            | Domain(s) with predicted role in transmembrane transport and integral to membrane localization                                                                                                                                                                                                                     | prot_ID_283            | An13g03110        |

# An14g01910 cluster

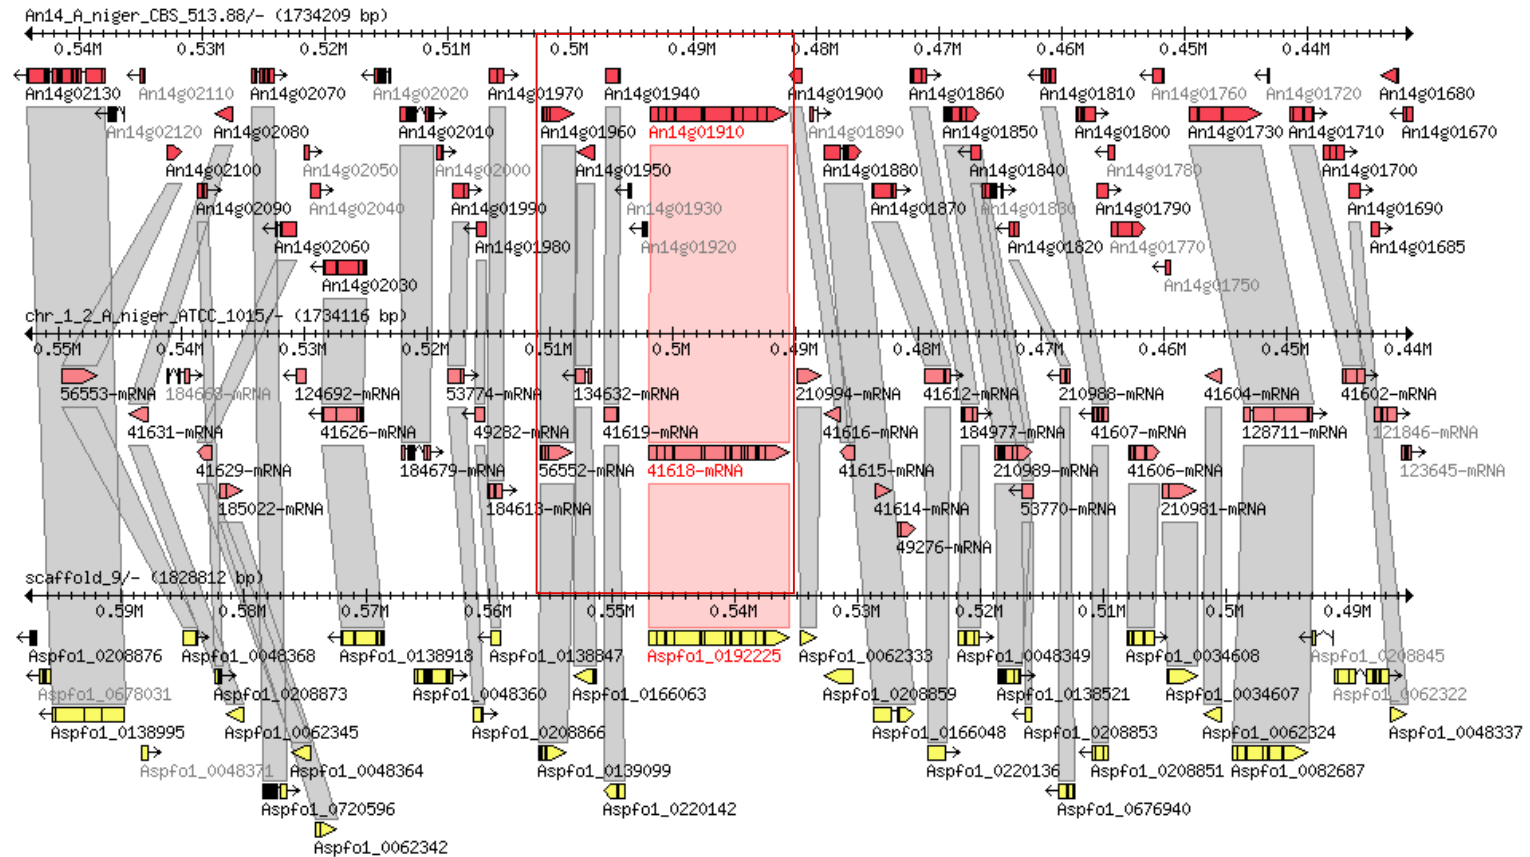

**An14g01910 cluster**

| Gene id (SMURF)   | Gene positions | Gene distance | AspGD name | AspGD description line or supplemental annotation                                                                                                                                                                                                                                      | protein ID (antiSMASH) | AspGD ID          |     |
|-------------------|----------------|---------------|------------|----------------------------------------------------------------------------------------------------------------------------------------------------------------------------------------------------------------------------------------------------------------------------------------|------------------------|-------------------|-----|
| n/a               |                |               | phiA       | Putative cell wall protein similar to A. nidulans phiA; abundantly expressed on d-xylose; induced by caspofungin                                                                                                                                                                       | prot_ID_354            | An14g01820        |     |
| n/a               |                |               |            |                                                                                                                                                                                                                                                                                        | prot_ID_339            | An14g01830        |     |
| n/a               |                |               |            | Ortholog of A. nidulans FGSC A4 : AN3215, AN7166, AN8609, A. fumigatus Af293 : Afu3g14210, Afu4g03360 and A. niger CBS 513.88 : An09g04200                                                                                                                                             | prot_ID_393            | An14g01840        |     |
| An14g01850        | 6              | 1634          |            | Domain(s) with predicted amino acid transmembrane transporter activity, role in amino acid transmembrane transport and membrane localization                                                                                                                                           | prot_ID_557            | An14g01850        |     |
| An14g01860        | 5              | 965           |            | Mitochondrial carrier protein                                                                                                                                                                                                                                                          | prot_ID_487            | An14g01860        |     |
| An14g01870        | 4              | 751           |            | Domain(s) with predicted ATP binding, nucleoside-triphosphatase activity                                                                                                                                                                                                               | prot_ID_375            | An14g01870        |     |
| An14g01880        | 3              | 503           |            | Phosphatidylserine decarboxylase                                                                                                                                                                                                                                                       | prot_ID_143            | An14g01880        |     |
| An14g01890        | 2              | 649           |            |                                                                                                                                                                                                                                                                                        | prot_ID_473            | An14g01890        |     |
| An14g01900        | 1              | 151           |            | Ortholog of A. niger ATCC 1015 : 41615-mRNA                                                                                                                                                                                                                                            | prot_ID_71             | An14g01900        |     |
| <b>An14g01910</b> | 0              | 0             |            | <b>Ortholog(s) have role in pseurotin A biosynthetic process</b>                                                                                                                                                                                                                       | <b>prot_ID_517</b>     | <b>An14g01910</b> | ECS |
| An14g01920        | -1             | 237           |            | Questionable ORF                                                                                                                                                                                                                                                                       | prot_ID_358            | An14g01920        |     |
| An14g01930        | -2             | 959           |            | Questionable ORF                                                                                                                                                                                                                                                                       | prot_ID_403            | An14g01930        |     |
| An14g01940        | -3             | 583           |            | Putative enoyl reductase                                                                                                                                                                                                                                                               | prot_ID_188            | An14g01940        |     |
| An14g01950        | -4             | 918           |            | Domain(s) with predicted alcohol O-acetyltransferase activity and role in alcohol metabolic process<br>Ortholog of A. nidulans FGSC A4 : AN7165, A. fumigatus Af293 : Afu4g03330, A. oryzae RIB40 : AO090011000165, A. niger ATCC 1015 : 56552-mRNA and A. versicolor : Aspve1_0140829 | prot_ID_490            | An14g01950        |     |
| An14g01960        | -5             | 480           |            | Domain(s) with predicted sequence-specific DNA binding RNA polymerase II transcription factor activity, sequence-specific DNA binding transcription factor activity, zinc ion binding activity                                                                                         | prot_ID_565            | An14g01960        | ECS |
| An14g01970        | -6             | 2981          |            | Ortholog(s) have intracellular localization                                                                                                                                                                                                                                            | prot_ID_691            | An14g01970        |     |
| n/a               |                |               |            | Protein of unknown function; expression induced by tunicamycin and DTT                                                                                                                                                                                                                 | prot_ID_361            | An14g01980        |     |
| n/a               |                |               |            |                                                                                                                                                                                                                                                                                        | prot_ID_418            | An14g01990        |     |
| n/a               |                |               |            |                                                                                                                                                                                                                                                                                        | prot_ID_286            | An14g02000        |     |



|     |                                                                                                                                                             |             |            |
|-----|-------------------------------------------------------------------------------------------------------------------------------------------------------------|-------------|------------|
| n/a | Domain(s) with predicted cation transmembrane transporter activity, role in cation transport, transmembrane transport and integral to membrane localization | prot_ID_617 | An14g02010 |
|-----|-------------------------------------------------------------------------------------------------------------------------------------------------------------|-------------|------------|

# An14g04850 cluster

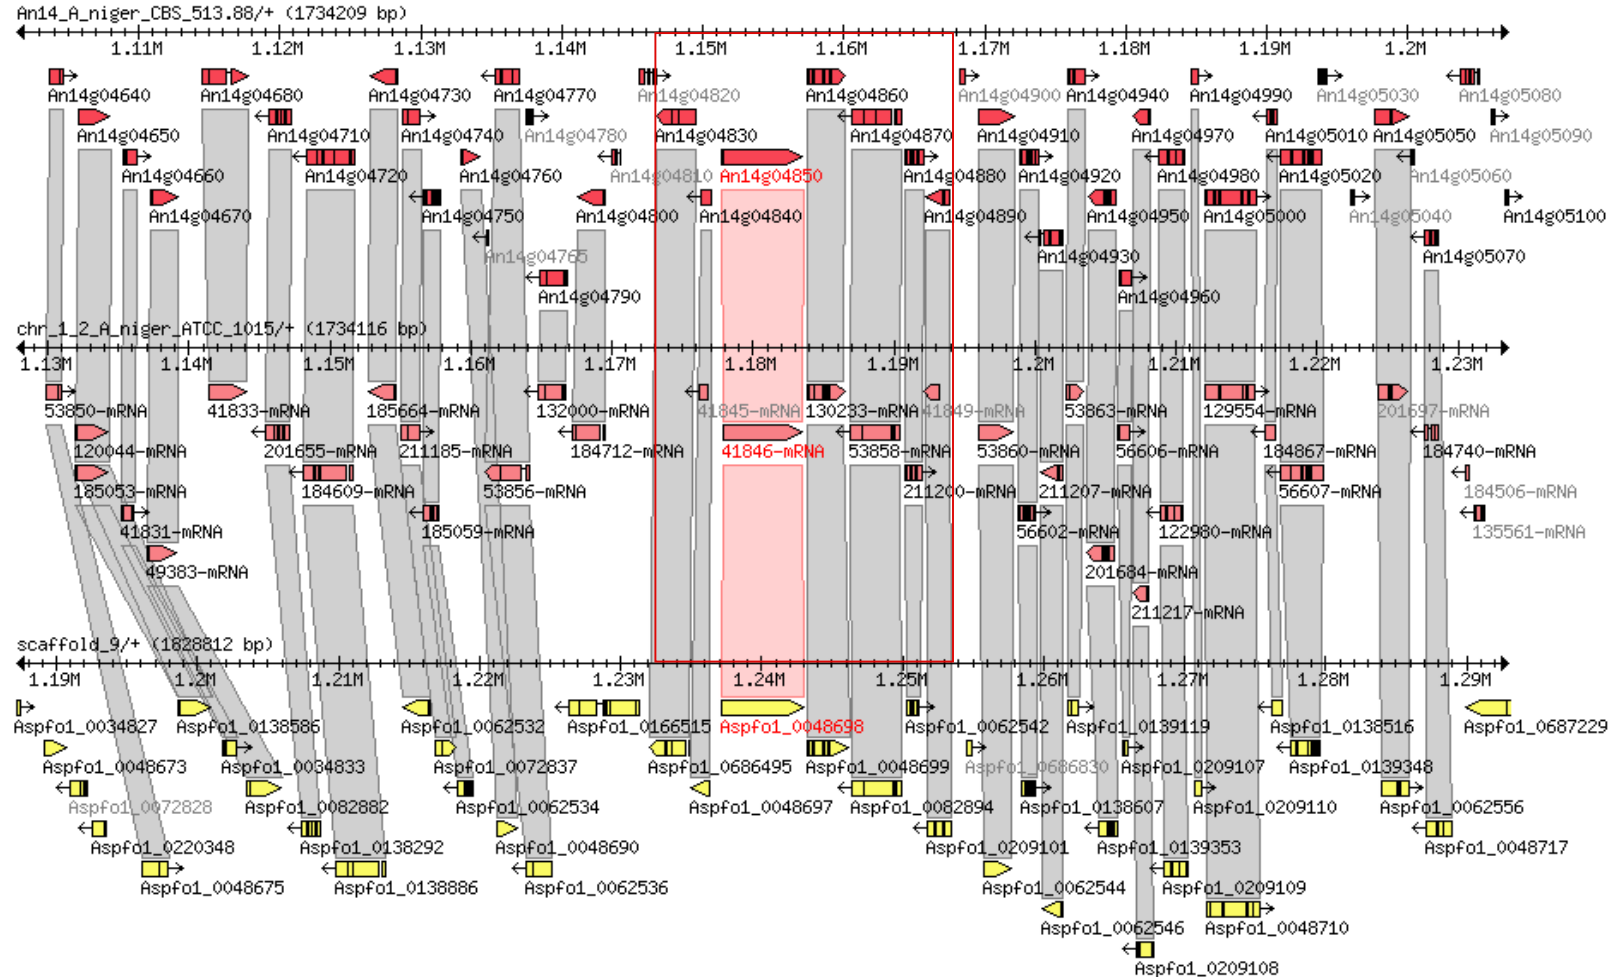

**An14g04850 cluster**

| Gene id (SMURF)   | Gene positions | Gene distance | AspGD name | AspGD description line or supplemental annotation                                                                                                                                                                                          | protein ID (antiSMASH) | AspGD ID          |     |
|-------------------|----------------|---------------|------------|--------------------------------------------------------------------------------------------------------------------------------------------------------------------------------------------------------------------------------------------|------------------------|-------------------|-----|
| n/a               |                |               |            | Ortholog of <i>A. oryzae</i> RIB40 : AO090020000229, <i>A. brasiliensis</i> : Aspbr1_0114295, <i>Aspergillus flavus</i> NRRL 3357 : AFL2T_11065 and <i>A. acidus</i> : Aspfo1_0062534                                                      | prot_ID_312            | An14g04750        |     |
| n/a               |                |               |            | Domain(s) with predicted nucleotide binding activity                                                                                                                                                                                       | prot_ID_479            | An14g04760        |     |
| n/a               |                |               |            | Protein of unknown function                                                                                                                                                                                                                | prot_ID_706            | An14g04765        |     |
| n/a               |                |               |            | Domain(s) with predicted protein serine/threonine phosphatase activity, role in protein dephosphorylation and protein serine/threonine phosphatase complex localization                                                                    | prot_ID_84             | An14g04770        |     |
| n/a               |                |               |            | Protein of unknown function                                                                                                                                                                                                                | prot_ID_680            | An14g04780        |     |
| n/a               |                |               |            | Domain(s) with predicted peptidyl-prolyl cis-trans isomerase activity, ubiquitin-protein ligase activity, role in protein folding, protein ubiquitination and ubiquitin ligase complex localization                                        | prot_ID_626            | An14g04790        |     |
| n/a               |                |               |            | Ortholog(s) have role in cytoplasmic mRNA processing body assembly, deadenylation-independent decapping of nuclear-transcribed mRNA                                                                                                        | prot_ID_591            | An14g04800        |     |
| n/a               |                |               |            | Protein of unknown function                                                                                                                                                                                                                | prot_ID_327            | An14g04810        |     |
| n/a               |                |               |            | Protein of unknown function                                                                                                                                                                                                                | prot_ID_660            | An14g04820        |     |
| An14g04830        | 2              | 403           |            | Ortholog(s) have ATP-dependent DNA helicase activity, role in DNA replication, mitochondrial genome maintenance, replication fork progression beyond termination site and nuclear telomeric heterochromatin, replication fork localization | prot_ID_727            | An14g04830        | ECS |
| An14g04840        | 1              | 798           |            | Ortholog of <i>A. brasiliensis</i> : Aspbr1_0602357, <i>A. acidus</i> : Aspfo1_0045093, Aspfo1_0048697 and <i>Aspergillus terreus</i> NIH2624 : ATET_09618                                                                                 | prot_ID_420            | An14g04840        |     |
| <b>An14g04850</b> | 0              | 0             |            | <b>Putative polyketide synthase (PKS)</b>                                                                                                                                                                                                  | <b>prot_ID_124</b>     | <b>An14g04850</b> |     |
| An14g04860        | -1             | 305           |            | Domain(s) with predicted intracellular localization                                                                                                                                                                                        | prot_ID_561            | An14g04860        |     |
| An14g04870        | -2             | 926           |            | Domain(s) with predicted GTP binding, GTPase activity                                                                                                                                                                                      | prot_ID_15             | An14g04870        |     |
| n/a               |                |               |            | Vacuolar protein-sorting protein                                                                                                                                                                                                           | prot_ID_423            | An14g04880        |     |
| n/a               |                |               |            | Domain(s) with predicted ATP binding, protein tyrosine kinase activity and role in protein phosphorylation                                                                                                                                 | prot_ID_278            | An14g04890        | ECS |
| n/a               |                |               |            | Protein of unknown function                                                                                                                                                                                                                | prot_ID_613            | An14g04900        |     |
| n/a               |                |               |            | Ortholog of <i>A. nidulans</i> FGSC A4 : AN6899, <i>A. oryzae</i> RIB40 : AO090120000492, <i>A. niger</i> ATCC 1015 : 53860-mRNA, <i>A. versicolor</i> : Aspve1_0121406 and <i>A. sydowii</i> :                                            | prot_ID_237            | An14g04910        |     |

|     |      |                                                                                                                                |             |            |
|-----|------|--------------------------------------------------------------------------------------------------------------------------------|-------------|------------|
|     |      | Aspsy1_0040365                                                                                                                 |             |            |
| n/a | tpiA | Triose-phosphate-isomerase                                                                                                     | prot_ID_690 | An14g04920 |
| n/a |      | Ortholog(s) have role in mitochondrion distribution,<br>mitochondrion morphogenesis and mitochondrial<br>membrane localization | prot_ID_368 | An14g04930 |
| n/a |      | Domain(s) with predicted role in ribosome biogenesis<br>and intracellular localization                                         | prot_ID_594 | An14g04940 |

## An15g02130 cluster

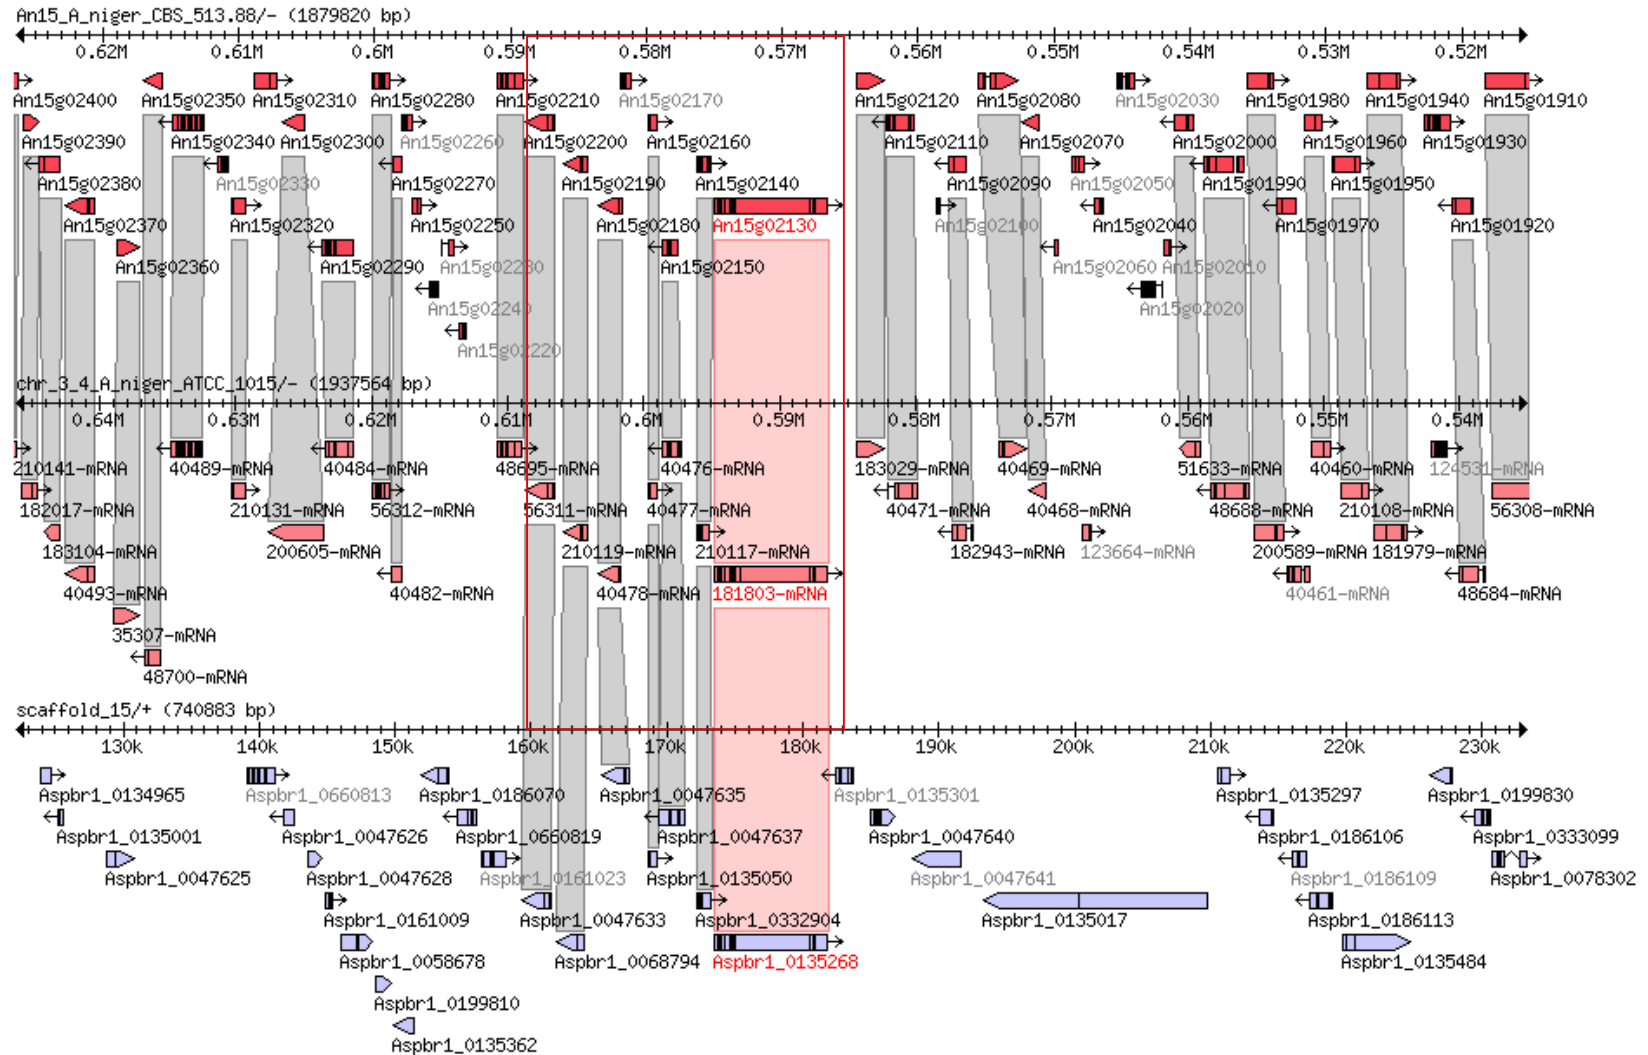

**An15g02130 cluster**

| Gene id (SMURF)   | Gene positions | Gene distance | AspGD name | AspGD description line or supplemental annotation                                                                                                                                                                                                                 | protein ID (antiSMASH) | AspGD ID              |
|-------------------|----------------|---------------|------------|-------------------------------------------------------------------------------------------------------------------------------------------------------------------------------------------------------------------------------------------------------------------|------------------------|-----------------------|
| n/a               |                |               |            | Ortholog of A. nidulans FGSC A4 : AN6657, A. fumigatus Af293 : Afu6g03400, A. versicolor : Aspve1_0086179 and A. sydowii : Aspsy1_0157063                                                                                                                         | prot_ID_734            | An15g02040            |
| n/a               |                |               |            | Protein of unknown function                                                                                                                                                                                                                                       | prot_ID_619            | An15g02050            |
| n/a               |                |               |            |                                                                                                                                                                                                                                                                   | prot_ID_398            | An15g02060            |
| An15g02070        | 6              | 154           |            | Domain(s) with predicted monooxygenase activity and role in oxidation-reduction process                                                                                                                                                                           | prot_ID_69             | An15g02070            |
| An15g02080        | 5              | 893           |            | Domain(s) with predicted DNA binding, sequence-specific DNA binding RNA polymerase II transcription factor activity, sequence-specific DNA binding transcription factor activity, zinc ion binding activity                                                       | prot_ID_730            | An15g02080            |
| An15g02090        | 4              | 493           |            | Ortholog of A. nidulans FGSC A4 : AN0196, A. fumigatus Af293 : Afu5g14200, Afu6g13810, Afu8g01720, A. niger CBS 513.88 : An04g09640, A. oryzae RIB40 : AO090003001444 and A. niger ATCC 1015 : 182943-mRNA                                                        | prot_ID_512            | An15g02090            |
| An15g02100        | 3              | 1640          |            | Protein of unknown function                                                                                                                                                                                                                                       | prot_ID_424            | An15g02100            |
| An15g02110        | 2              | 188           |            | Ortholog of A. acidus : Aspfo1_0081847, A. niger ATCC 1015 : 40471-mRNA and Aspergillus carbonarius ITEM 5010 : Acar5010_400349                                                                                                                                   | prot_ID_764            | An15g02110            |
| An15g02120        | 1              | 2104          |            | Ortholog(s) have role in cellular response to drug, conidium formation, pathogenesis, regulation of conidium formation                                                                                                                                            | prot_ID_591            | An15g02120            |
| <b>An15g02130</b> | 0              | 0             |            | <b>Putative polyketide synthase (PKS); ortholog(s) have role in asperfuranone biosynthetic process, emericellamide biosynthetic process, monodictyphenone biosynthetic process, o-orsellinic acid biosynthetic process, sterigmatocystin biosynthetic process</b> | <b>prot_ID_719</b>     | <b>An15g02130</b> ECS |
| An15g02140        | -1             | 153           |            | Ortholog of A. brasiliensis : Aspbr1_0332904, A. acidus : Aspfo1_0042378 and A. niger ATCC 1015 : 210117-mRNA                                                                                                                                                     | prot_ID_96             | An15g02140            |
| An15g02150        | -2             | 1511          |            | Ortholog of A. niger CBS 513.88 : An01g01780, A. oryzae RIB40 : AO090026000150, A. brasiliensis : Aspbr1_0047637 and A. niger ATCC 1015 : 171681-mRNA, 40476-mRNA                                                                                                 | prot_ID_682            | An15g02150            |
| An15g02160        | -3             | 285           |            | Domain(s) with predicted peroxiredoxin activity and role in oxidation-reduction process                                                                                                                                                                           | prot_ID_267            | An15g02160            |
| An15g02170        | -4             | 1105          |            | Protein of unknown function                                                                                                                                                                                                                                       | prot_ID_400            | An15g02170            |

|            |    |      |                                                                                                                                          |             |            |     |
|------------|----|------|------------------------------------------------------------------------------------------------------------------------------------------|-------------|------------|-----|
| An15g02180 | -5 | 72   | Domain(s) with predicted monooxygenase activity and role in oxidation-reduction process                                                  | prot_ID_353 | An15g02180 |     |
| An15g02190 | -6 | 1084 | Domain(s) with predicted role in transmembrane transport and integral to membrane localization                                           | prot_ID_679 | An15g02190 |     |
| n/a        |    | aod1 | Alcohol oxidase; induced by growth on starch and lactate                                                                                 | prot_ID_162 | An15g02200 | ECS |
| n/a        |    |      | Ortholog of A. nidulans FGSC A4 : AN7948, A. niger ATCC 1015 : 48695-mRNA, A. acidus : Aspfo1_0071750 and A. versicolor : Aspve1_0063096 | prot_ID_572 | An15g02210 |     |
| n/a        |    |      | Protein of unknown function                                                                                                              | prot_ID_391 | An15g02220 |     |
| n/a        |    |      | Protein of unknown function                                                                                                              | prot_ID_651 | An15g02230 |     |

## An15g04140 cluster

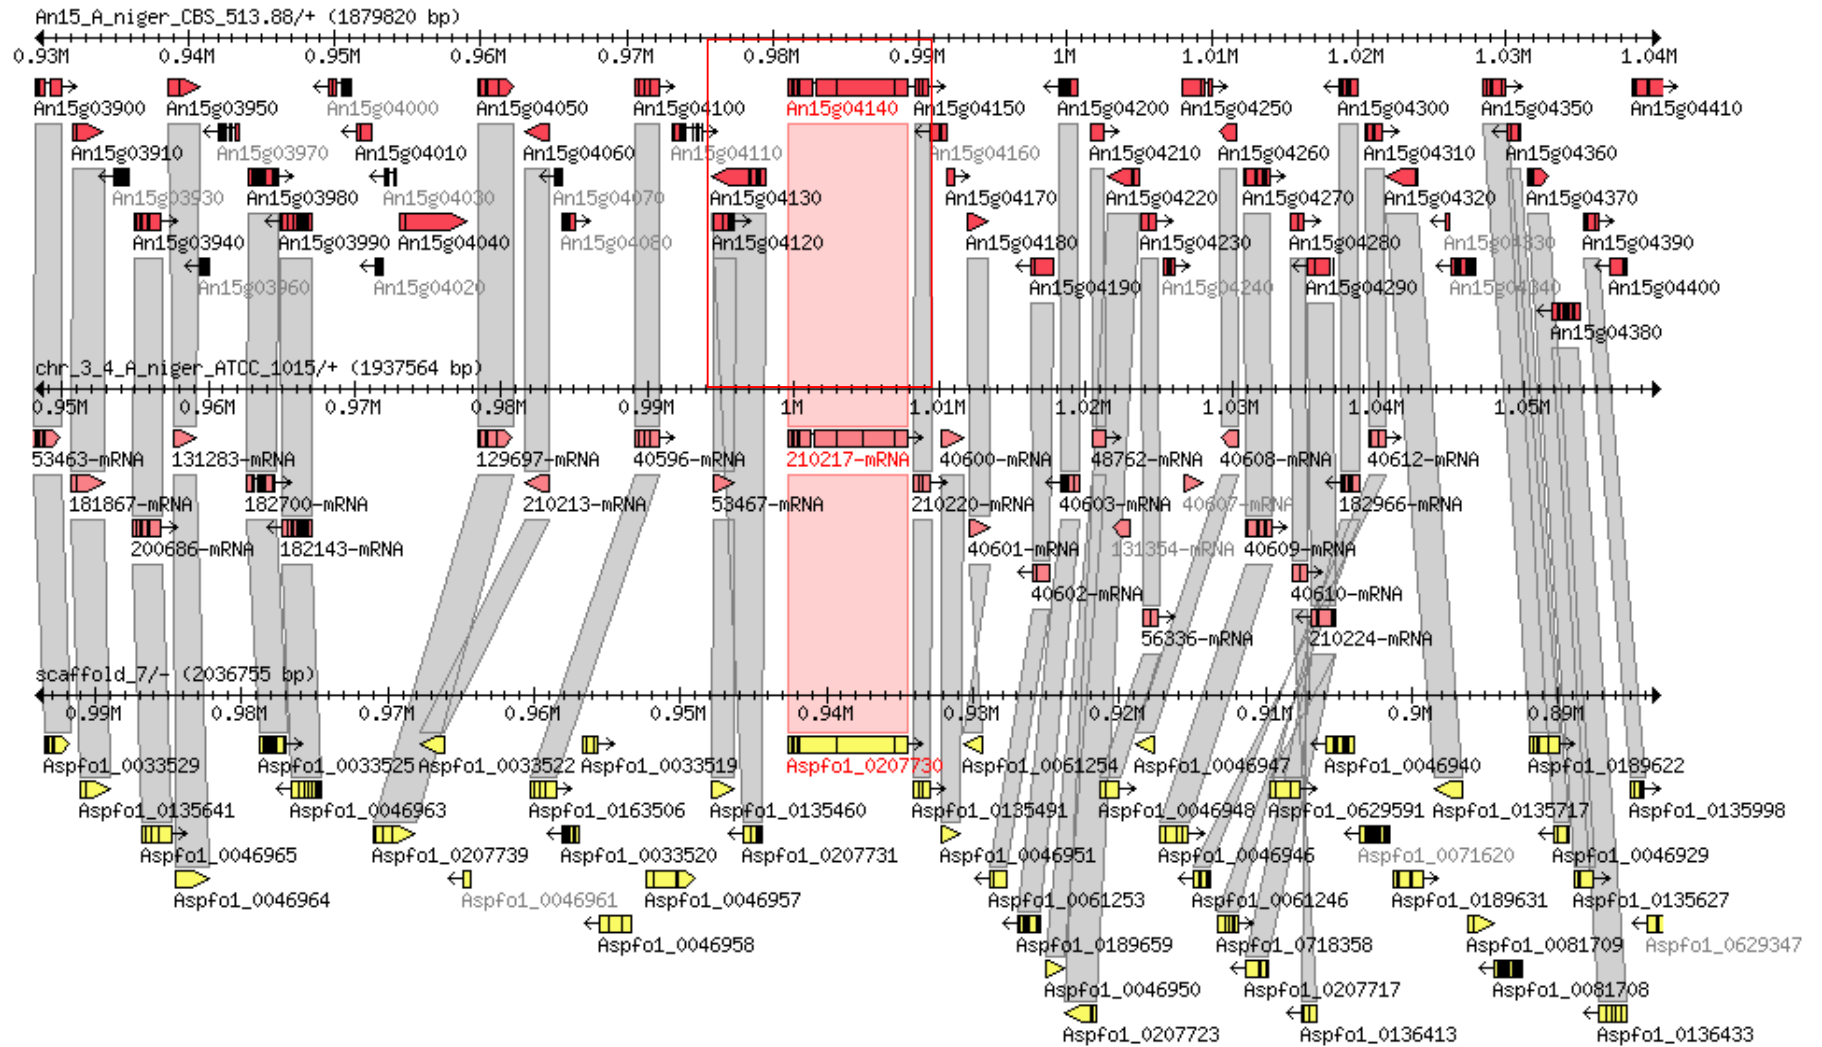



**An15g04140 cluster**

| Gene id (SMURF)   | Gene positions | Gene distance | AspGD name | AspGD description line or supplemental annotation                                                                                                                                                                                                                  | protein ID (antiSMASH) | AspGD ID          |
|-------------------|----------------|---------------|------------|--------------------------------------------------------------------------------------------------------------------------------------------------------------------------------------------------------------------------------------------------------------------|------------------------|-------------------|
| n/a               |                |               |            | Domain(s) with predicted solute:hydrogen antiporter activity, role in cation transport, transmembrane transport and integral to membrane localization                                                                                                              | prot_ID_42             | An15g04050        |
| n/a               |                |               |            | Putative fructose transporter                                                                                                                                                                                                                                      | prot_ID_154            | An15g04060        |
| n/a               |                |               |            | Protein of unknown function                                                                                                                                                                                                                                        | prot_ID_282            | An15g04070        |
| n/a               |                |               |            | Protein of unknown function                                                                                                                                                                                                                                        | prot_ID_143            | An15g04080        |
| n/a               |                |               |            | Domain(s) with predicted oxidoreductase activity, acting on the aldehyde or oxo group of donors, NAD or NADP as acceptor activity and role in oxidation-reduction process                                                                                          | prot_ID_369            | An15g04100        |
| n/a               |                |               |            | Protein of unknown function                                                                                                                                                                                                                                        | prot_ID_261            | An15g04110        |
| An15g04120        | 2              | 573           |            | Ortholog of A. nidulans FGSC A4 : AN6764, AN2660, AN7798, A. fumigatus Af293 : Afu8g01960 and A. niger CBS 513.88 : An11g05430, An01g12050, An11g03480, An01g01140                                                                                                 | prot_ID_35             | An15g04120        |
| An15g04130        | 1              | 1877          |            | Ortholog of A. acidus : Aspfo1_0207731                                                                                                                                                                                                                             | prot_ID_325            | An15g04130        |
| <b>An15g04140</b> | 0              | 0             |            | <b>Multifunctional polyketide synthase, ortholog(s) have role in asperfuranone biosynthetic process, emericellamide biosynthetic process, monodictyphenone biosynthetic process, o-orsellinic acid biosynthetic process, sterigmatocystin biosynthetic process</b> | <b>prot_ID_211</b>     | <b>An15g04140</b> |
| An15g04150        | -1             | 454           |            | Domain(s) with predicted nucleotide binding, oxidoreductase activity and role in oxidation-reduction process                                                                                                                                                       | prot_ID_150            | An15g04150        |
| An15g04160        | -2             | 106           |            | Domain(s) with predicted nucleic acid binding activity                                                                                                                                                                                                             | prot_ID_107            | An15g04160        |
| An15g04170        | -3             | 16            |            | Ortholog of A. oryzae RIB40 : AO090026000058                                                                                                                                                                                                                       | prot_ID_319            | An15g04170        |
| An15g04180        | -4             | 937           |            | Domain(s) with predicted electron carrier activity, heme binding, iron ion binding, oxidoreductase activity, acting on paired donors, with incorporation or reduction of molecular oxygen activity and role in oxidation-reduction process                         | prot_ID_528            | An15g04180        |
| An15g04190        | -5             | 2974          |            | Ortholog of A. niger CBS 513.88 : An13g03430, A. brasiliensis : Aspbr1_0057462, A. acidus : Aspfo1_0061253, Aspergillus niger ATCC 1015 : 40602-mRNA and A. niger ATCC 1015 : 44906-mRNA                                                                           | prot_ID_747            | An15g04190        |
| An15g04200        | -6             | 419           |            | Ortholog of A. niger CBS 513.88 : An13g03420, Neosartorya fischeri NRRL 181 : NFIA_002260, A. versicolor : Aspve1_0074246 and A. sydowii : Aspsy1_0134618                                                                                                          | prot_ID_495            | An15g04200        |

|            |    |     |                                                                                                                                             |             |            |
|------------|----|-----|---------------------------------------------------------------------------------------------------------------------------------------------|-------------|------------|
| An15g04210 | -7 | 843 | Domain(s) with predicted oxidoreductase activity and role in oxidation-reduction process                                                    | prot_ID_420 | An15g04210 |
| An15g04220 | -8 | 251 | Domain(s) with predicted DNA binding, zinc ion binding activity, role in transcription, DNA-dependent and nucleus localization              | prot_ID_491 | An15g04220 |
| n/a        |    |     | Domain(s) with predicted lyase activity and role in metabolic process                                                                       | prot_ID_579 | An15g04230 |
| n/a        |    |     | Protein of unknown function                                                                                                                 | prot_ID_358 | An15g04240 |
| n/a        |    |     | Ortholog of <i>A. brasiliensis</i> : Aspbr1_0287784, <i>A. sydowii</i> : Aspsy1_0041297 and <i>Aspergillus terreus</i> NIH2624 : ATET_06176 | prot_ID_212 | An15g04250 |

## An15g05090 cluster

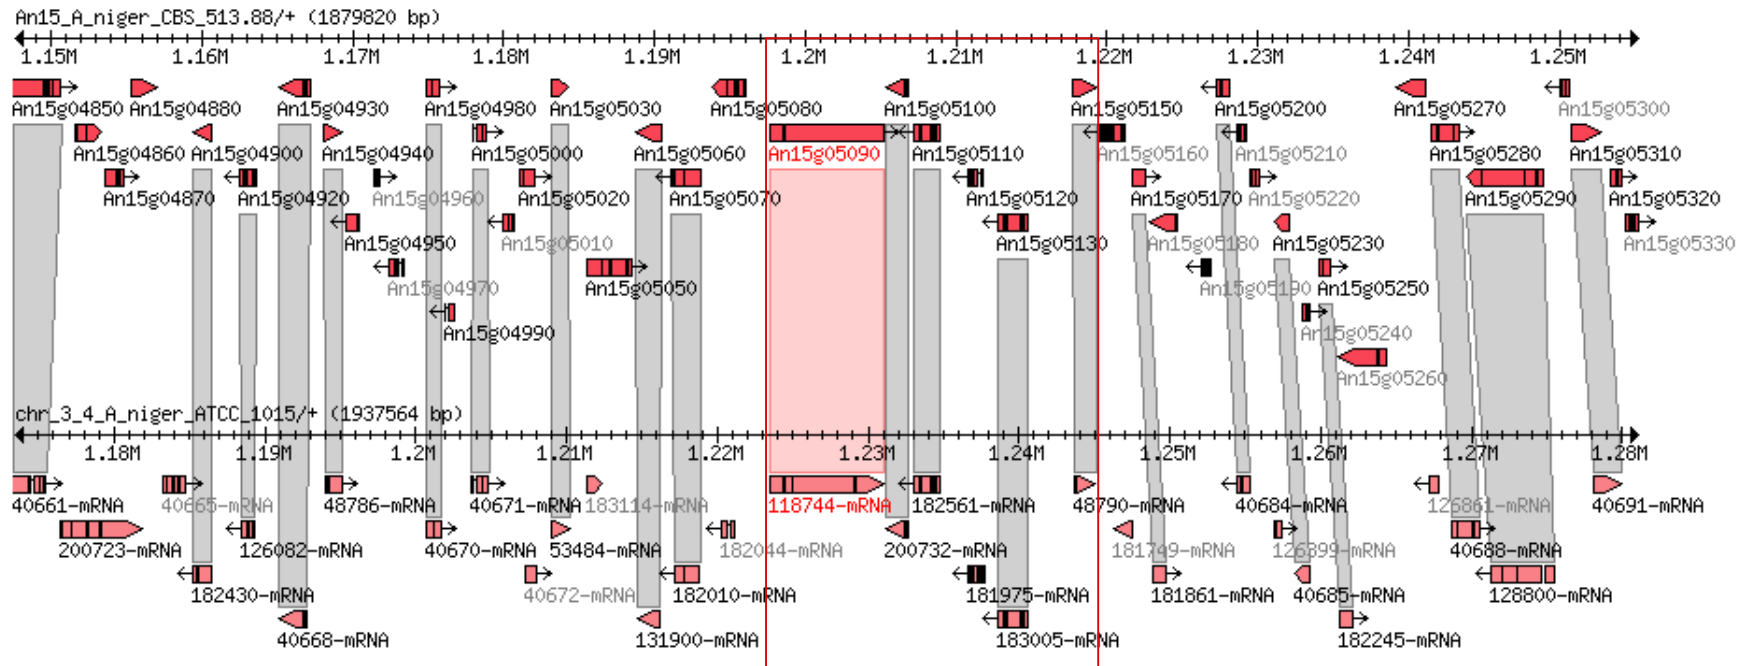

**An15g05090 cluster**

| Gene id (SMURF)   | Gene positions | Gene distance | AspGD name | AspGD description line or supplemental annotation                                                                                                                                                                          | protein ID (antiSMASH) | AspGD ID          |
|-------------------|----------------|---------------|------------|----------------------------------------------------------------------------------------------------------------------------------------------------------------------------------------------------------------------------|------------------------|-------------------|
| n/a               |                |               |            | Ortholog of A. niger ATCC 1015 : 40671-mRNA                                                                                                                                                                                | prot_ID_171            | An15g05000        |
| n/a               |                |               |            |                                                                                                                                                                                                                            | prot_ID_756            | An15g05010        |
| n/a               |                |               |            | Ortholog of A. oryzae RIB40 : AO090010000253, AO090010000280 and N. fischeri NRRL 181 : NFIA_057710                                                                                                                        | prot_ID_351            | An15g05020        |
| An15g05030        | 5              | 1196          |            | Ortholog of A. nidulans FGSC A4 : AN8528, AN12291, A. fumigatus Af293 : Afu5g09790, A. oryzae RIB40 : AO090010000330 and A. niger ATCC 1015 : 53484-mRNA                                                                   | prot_ID_262            | An15g05030        |
| An15g05050        | 4              | 294           |            | Domain(s) with predicted ADP binding, ATP binding, catalytic activity and role in apoptotic process, defense response, nucleoside metabolic process                                                                        | prot_ID_91             | An15g05050        |
| An15g05060        | 3              | 700           |            | Domain(s) with predicted role in transmembrane transport and integral to membrane localization                                                                                                                             | prot_ID_75             | An15g05060        |
| An15g05070        | 2              | 733           |            | Domain(s) with predicted electron carrier activity, heme binding, iron ion binding, monooxygenase activity, oxidoreductase activity, acting on paired donors, with incorporation or reduction of molecular oxygen activity | prot_ID_371            | An15g05070        |
| An15g05080        | 1              | 1602          |            | Domain(s) with predicted DNA binding, sequence-specific DNA binding RNA polymerase II transcription factor activity, sequence-specific DNA binding transcription factor activity, zinc ion binding activity                | prot_ID_641            | An15g05080        |
| <b>An15g05090</b> | 0              | 0             |            | <b>Domain(s) with predicted ACP phosphopantetheine attachment site binding involved in fatty acid biosynthetic process, nucleotide binding, oxidoreductase activity and transferase activity, more</b>                     | <b>prot_ID_63</b>      | <b>An15g05090</b> |
| An15g05100        | -1             | 83            |            | Domain(s) with predicted sequence-specific DNA binding RNA polymerase II transcription factor activity, sequence-specific DNA binding transcription factor activity, zinc ion binding activity                             | prot_ID_233            | An15g05100        |
| An15g05110        | -2             | 394           |            | Ortholog(s) have catalytic activity and role in steroid metabolic process                                                                                                                                                  | prot_ID_94             | An15g05110        |
| An15g05120        | -3             | 1773          |            | Domain(s) with predicted hydrolase activity, acting on carbon-nitrogen (but not peptide) bonds, in linear amides activity, role in ceramide metabolic process and integral to membrane localization                        | prot_ID_773            | An15g05120        |
| An15g05130        | -4             | 1051          |            | Domain(s) with predicted arylsulfatase activity and role in phenol-containing compound metabolic process                                                                                                                   | prot_ID_567            | An15g05130        |
| An15g05150        | -5             | 2990          |            | Domain(s) with predicted role in transmembrane transport and integral to membrane localization                                                                                                                             | prot_ID_106            | An15g05150        |
| n/a               |                |               |            | Protein of unknown function                                                                                                                                                                                                | prot_ID_737            | An15g05160        |

n/a  
n/a

Cysteine synthase  
Protein of unknown function

prot\_ID\_515 An15g05170  
prot\_ID\_183 An15g05180

## An15g07530 cluster

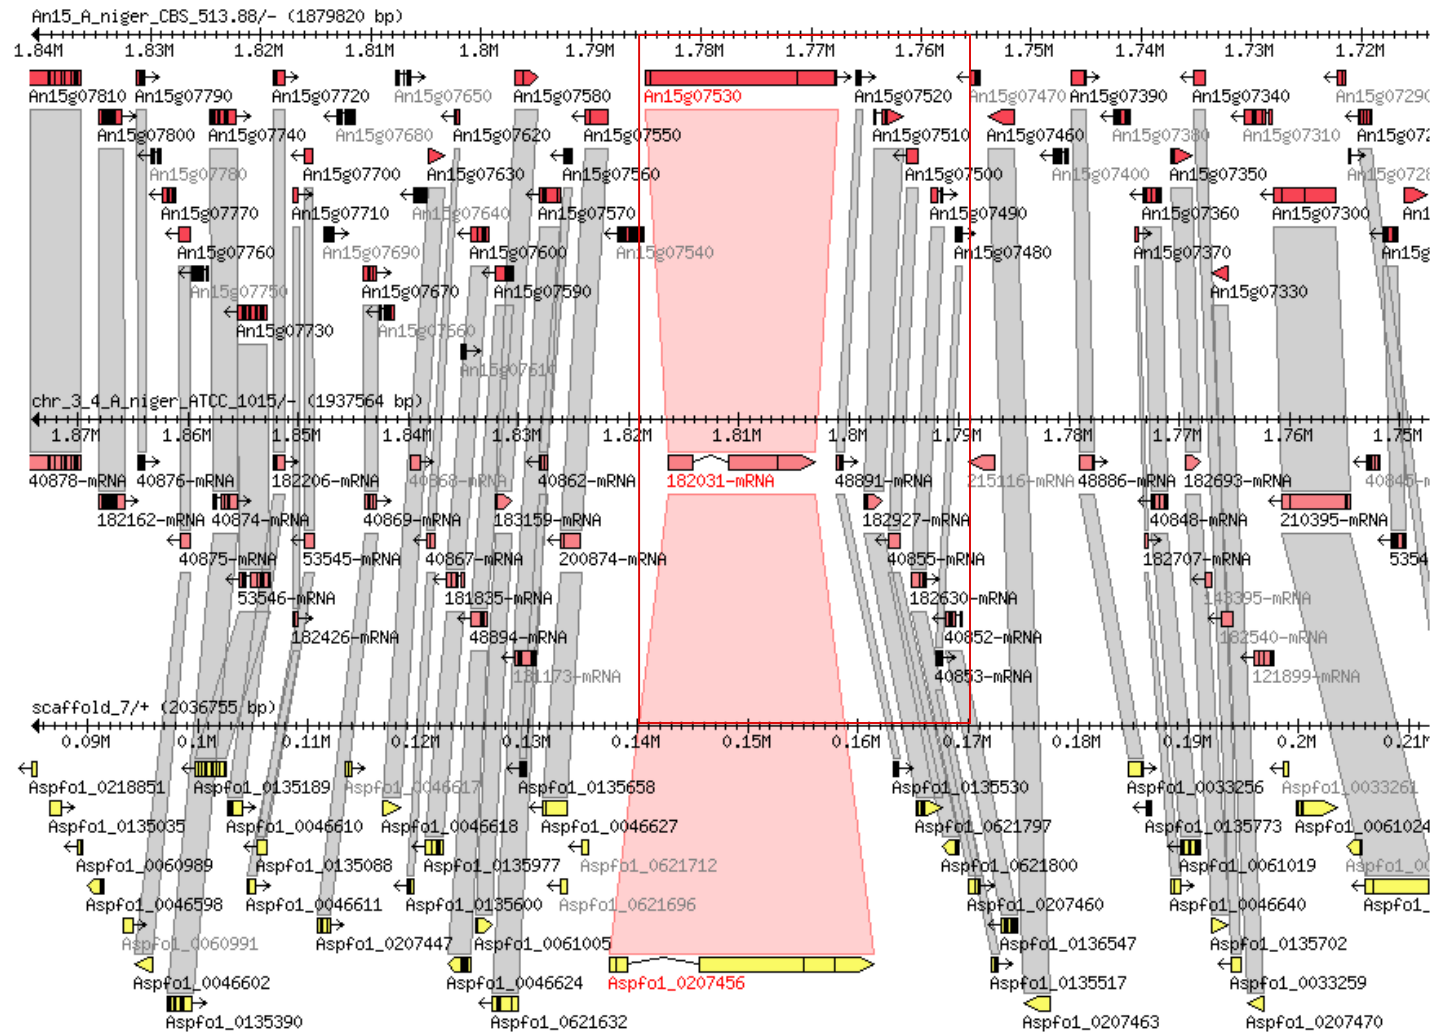

**An15g07530 cluster**

| Gene id (SMURF)   | Gene positions | Gene distance | AspGD name | AspGD description line or supplemental annotation                                                                                                                                                                                                         | protein ID (antiSMASH) | AspGD ID          |     |
|-------------------|----------------|---------------|------------|-----------------------------------------------------------------------------------------------------------------------------------------------------------------------------------------------------------------------------------------------------------|------------------------|-------------------|-----|
| n/a               |                |               |            | Protein of unknown function                                                                                                                                                                                                                               | prot_ID_694            | An15g07400        |     |
| n/a               |                |               |            | Oligopeptide transporter                                                                                                                                                                                                                                  | prot_ID_219            | An15g07460        |     |
| n/a               |                |               |            | Protein of unknown function                                                                                                                                                                                                                               | prot_ID_265            | An15g07470        |     |
| n/a               |                |               |            | Ortholog of <i>A. nidulans</i> FGSC A4 : AN0020, <i>A. fumigatus</i> Af293 : Afu2g00190, <i>A. niger</i> ATCC 1015 : 40853-mRNA, <i>A. versicolor</i> : Aspve1_0365574 and <i>A. sydowii</i> : Aspsy1_0476409                                             | prot_ID_488            | An15g07480        | ECS |
| n/a               |                |               |            | Domain(s) with predicted oxidoreductase activity and role in oxidation-reduction process                                                                                                                                                                  | prot_ID_329            | An15g07490        |     |
| n/a               |                |               |            | Putative ribokinase                                                                                                                                                                                                                                       | prot_ID_402            | An15g07500        |     |
| An15g07510        | 2              | 1030          |            | Domain(s) with predicted transporter activity, role in oligopeptide transport and membrane localization                                                                                                                                                   | prot_ID_138            | An15g07510        |     |
| An15g07520        | 1              | 1592          |            | Domain(s) with predicted catalytic activity and role in metabolic process                                                                                                                                                                                 | prot_ID_338            | An15g07520        |     |
| <b>An15g07530</b> | 0              | 0             |            | <b>Putative nonribosomal peptide synthase (NRPS)</b>                                                                                                                                                                                                      | <b>prot_ID_453</b>     | <b>An15g07530</b> | ECS |
| An15g07540        | -1             | 224           |            | Similar to <i>M. grisea</i> PTH11<br>Ortholog of <i>A. nidulans</i> FGSC A4 : AN11921, <i>A. fumigatus</i> Af293 : Afu8g07200, <i>A. oryzae</i> RIB40 : AO090701000752, <i>A. niger</i> ATCC 1015 : 200874-mRNA and <i>A. versicolor</i> : Aspve1_0131033 | prot_ID_592            | An15g07540        |     |
| An15g07550        | -2             | 1164          |            | Ortholog of <i>A. nidulans</i> FGSC A4 : AN7378, <i>A. fumigatus</i> Af293 : Afu4g14205, <i>A. oryzae</i> RIB40 : AO090103000092, <i>A. niger</i> ATCC 1015 : 40862-mRNA and <i>A. versicolor</i> : Aspve1_0187655                                        | prot_ID_506            | An15g07550        |     |
| An15g07560        | -3             | 1629          |            | Domain(s) with predicted arylsulfatase activity and role in phenol-containing compound metabolic process                                                                                                                                                  | prot_ID_613            | An15g07560        |     |
| An15g07570        | -4             | 360           |            | Domain(s) with predicted oxidoreductase activity and role in oxidation-reduction process                                                                                                                                                                  | prot_ID_660            | An15g07570        |     |
| An15g07580        | -5             | 214           |            | Domain(s) with predicted role in transmembrane transport and integral to membrane localization                                                                                                                                                            | prot_ID_534            | An15g07580        |     |
| An15g07590        | -6             | 627           |            | Domain(s) with predicted role in transmembrane transport and integral to membrane localization                                                                                                                                                            | prot_ID_54             | An15g07590        |     |
| An15g07600        | -7             | 586           |            | Domain(s) with predicted role in transmembrane transport and integral to membrane localization                                                                                                                                                            | prot_ID_563            | An15g07600        |     |
| n/a               |                |               |            | Protein of unknown function                                                                                                                                                                                                                               | prot_ID_189            | An15g07610        |     |

|     |                                                                                                                                                                                               |             |            |
|-----|-----------------------------------------------------------------------------------------------------------------------------------------------------------------------------------------------|-------------|------------|
| n/a | Ortholog of <i>A. brasiliensis</i> : Aspbr1_0034734, <i>A. acidus</i> : Aspfo1_0135600, <i>A. niger</i> ATCC 1015 : 40867-mRNA and <i>Aspergillus carbonarius</i> ITEM 5010 : Acar5010_209559 | prot_ID_309 | An15g07620 |
| n/a | Ortholog of <i>A. niger</i> CBS 513.88 : An12g03510, <i>A. acidus</i> : Aspfo1_0046618, <i>A. niger</i> ATCC 1015 : 42488-mRNA and <i>Aspergillus carbonarius</i> ITEM 5010 : Acar5010_053374 | prot_ID_247 | An15g07630 |
| n/a | Protein of unknown function                                                                                                                                                                   | prot_ID_134 | An15g07640 |



## An15g07910 cluster

Rare *A. carbonarius* match

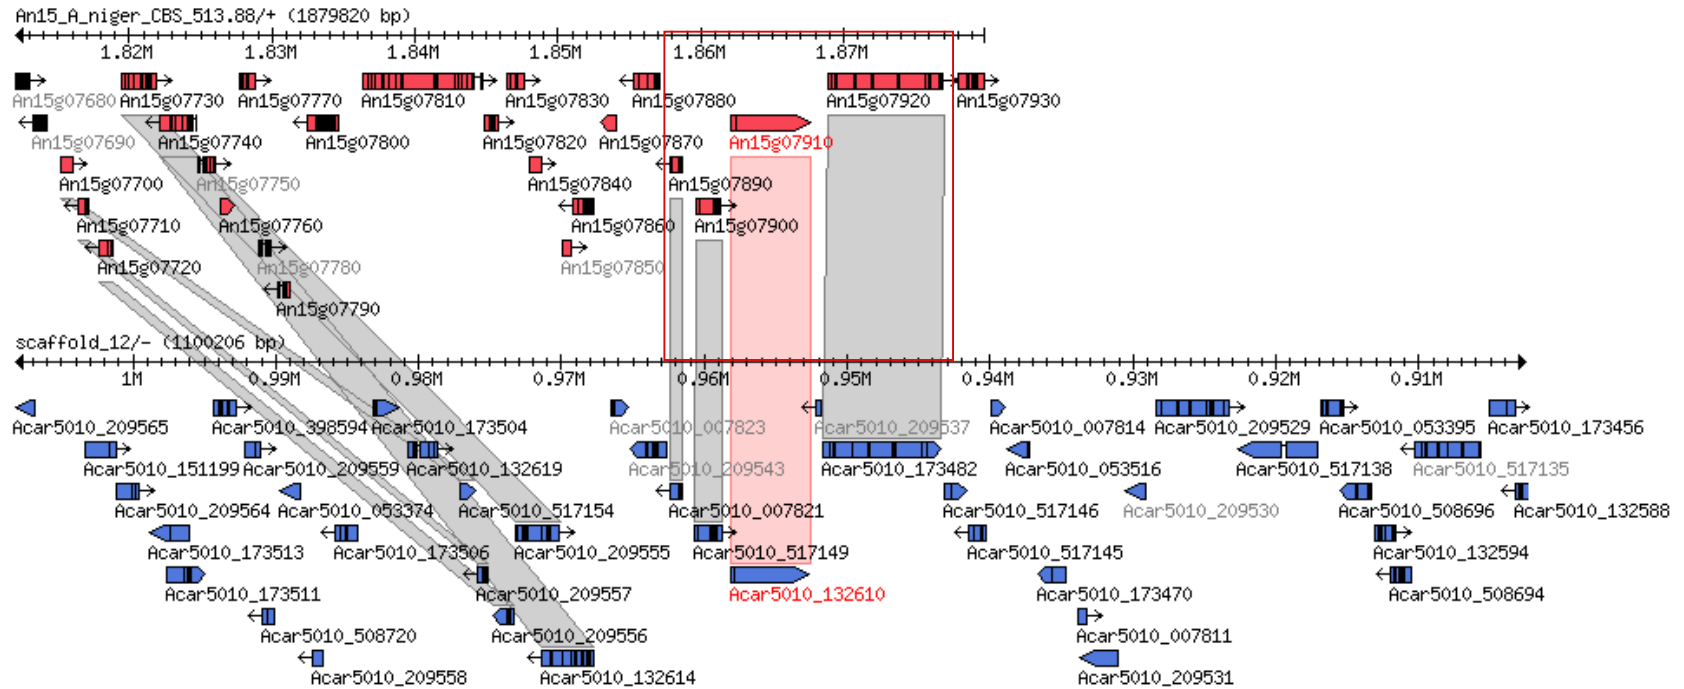

**An15g07910 cluster**

| Gene id (SMURF)   | Gene positions | Gene distance | AspGD name | AspGD description line or supplemental annotation                                                                                                                                                                                          | protein ID (antiSMASH) | AspGD ID          |     |
|-------------------|----------------|---------------|------------|--------------------------------------------------------------------------------------------------------------------------------------------------------------------------------------------------------------------------------------------|------------------------|-------------------|-----|
| n/a               |                |               | agsB       | Putative alpha-glucan synthase                                                                                                                                                                                                             | prot_ID_313            | An15g07810        |     |
| n/a               |                |               |            | Ortholog of A. brasiliensis : Aspbr1_0078933, A. acidus : Aspfo1_0046583, A. niger ATCC 1015 : 53547-mRNA and Aspergillus carbonarius ITEM 5010 : Acar5010_158371                                                                          | prot_ID_700            | An15g07820        |     |
| An15g07830        | 8              | 355           |            | Domain(s) with predicted hydrolase activity                                                                                                                                                                                                | prot_ID_124            | An15g07830        |     |
|                   |                |               |            | Ortholog of A. nidulans FGSC A4 : AN2942, AN10320, AN7130, A. fumigatus Af293 : Afu3g15110 and A. niger CBS 513.88 : An03g05620, An12g07260, An03g02580, An01g14840                                                                        | prot_ID_298            | An15g07840        |     |
| An15g07840        | 7              | 1433          |            | Protein of unknown function                                                                                                                                                                                                                | prot_ID_405            | An15g07850        |     |
| An15g07850        | 6              | 55            |            | Domain(s) with predicted nucleotide binding, oxidoreductase activity and role in oxidation-reduction process                                                                                                                               | prot_ID_302            | An15g07860        |     |
| An15g07860        | 5              | 466           |            | Domain(s) with predicted nucleotide binding, oxidoreductase activity, zinc ion binding activity and role in oxidation-reduction process                                                                                                    | prot_ID_432            | An15g07870        |     |
| An15g07870        | 4              | 1260          |            | Domain(s) with predicted monooxygenase activity and role in oxidation-reduction process                                                                                                                                                    | prot_ID_754            | An15g07880        |     |
| An15g07880        | 3              | 682           |            | Domain(s) with predicted sequence-specific DNA binding, sequence-specific DNA binding transcription factor activity, role in regulation of transcription, DNA-dependent and nucleus localization                                           | prot_ID_59             | An15g07890        | ECS |
| An15g07890        | 2              | 1022          |            | Domain(s) with predicted electron carrier activity, heme binding, iron ion binding, oxidoreductase activity, acting on paired donors, with incorporation or reduction of molecular oxygen activity and role in oxidation-reduction process | prot_ID_383            | An15g07900        |     |
| An15g07900        | 1              | 541           |            | Putative nonribosomal peptide synthase (NRPS)                                                                                                                                                                                              | <b>prot_ID_533</b>     | <b>An15g07910</b> |     |
| <b>An15g07910</b> | 0              | 0             |            | Protein required for ochratoxin A biosynthesis in black Aspergillus                                                                                                                                                                        | prot_ID_675            | An15g07920        | ECS |
| An15g07920        | -1             | 1121          |            | Domain(s) with predicted heme binding, nitric-oxide synthase activity and role in nitric oxide biosynthetic process, oxidation-reduction process                                                                                           | prot_ID_68             | An15g07930        |     |
| An15g07930        | -2             | 1032          |            |                                                                                                                                                                                                                                            |                        |                   |     |

## An15g07920 cluster

No manual prediction made

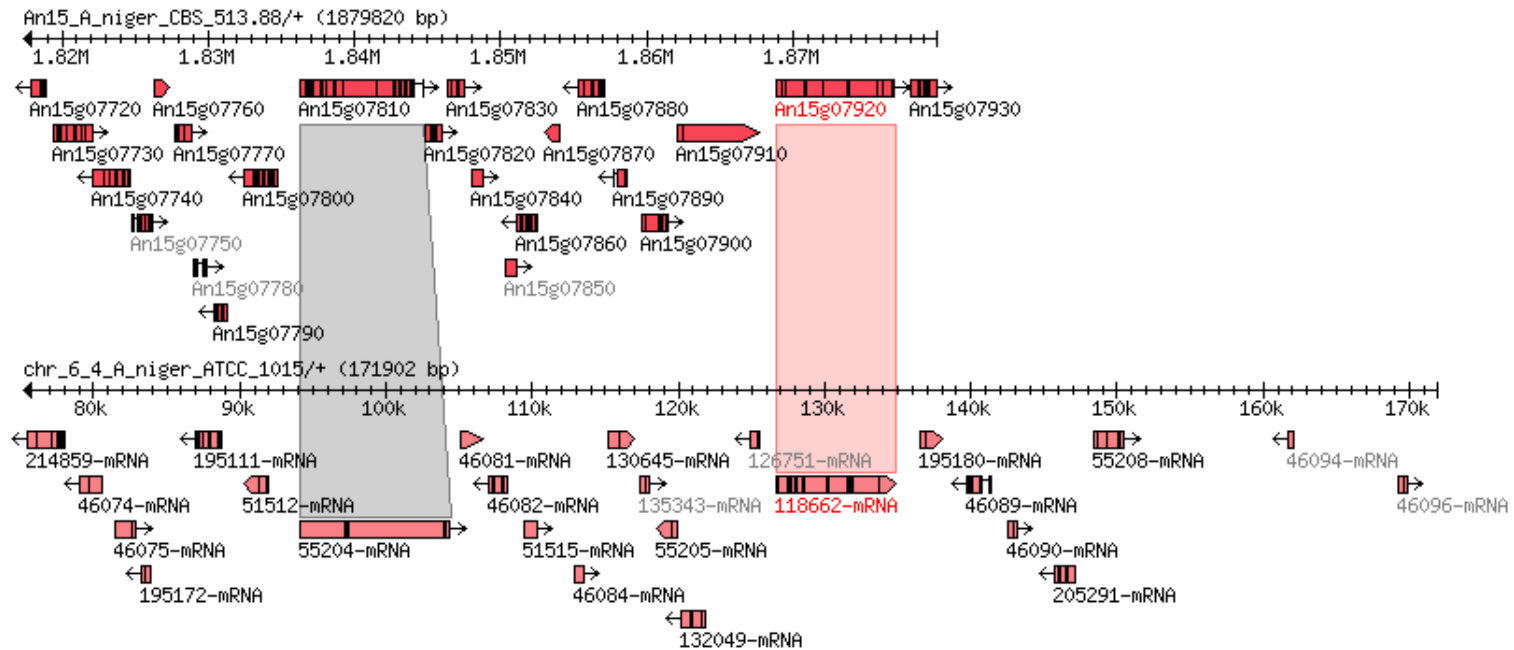

**An15g07920 cluster**

| Gene id (SMURF)   | Gene positions | Gene distance | AspGD name | AspGD description line or supplemental annotation                                                                                                                                                                                          | protein ID (antiSMASH) | AspGD ID          |
|-------------------|----------------|---------------|------------|--------------------------------------------------------------------------------------------------------------------------------------------------------------------------------------------------------------------------------------------|------------------------|-------------------|
| An15g07830        | 9              | 355           |            | Domain(s) with predicted hydrolase activity<br>Ortholog of A. nidulans FGSC A4 : AN2942, AN10320, AN7130, A. fumigatus Af293 : Afu3g15110 and A. niger CBS 513.88 : An03g05620, An12g07260, An03g02580, An01g14840                         | n/a                    | An15g07830        |
| An15g07840        | 8              | 1433          |            |                                                                                                                                                                                                                                            | n/a                    | An15g07840        |
| An15g07850        | 7              | 55            |            |                                                                                                                                                                                                                                            | n/a                    | An15g07850        |
| An15g07860        | 6              | 466           |            | Domain(s) with predicted nucleotide binding, oxidoreductase activity and role in oxidation-reduction process                                                                                                                               | n/a                    | An15g07860        |
| An15g07870        | 5              | 1260          |            | Domain(s) with predicted nucleotide binding, oxidoreductase activity, zinc ion binding activity and role in oxidation-reduction process                                                                                                    | n/a                    | An15g07870        |
| An15g07880        | 4              | 682           |            | Domain(s) with predicted monooxygenase activity and role in oxidation-reduction process                                                                                                                                                    | n/a                    | An15g07880        |
| An15g07890        | 3              | 1022          |            | Domain(s) with predicted sequence-specific DNA binding, sequence-specific DNA binding transcription factor activity, role in regulation of transcription, DNA-dependent and nucleus localization                                           | n/a                    | An15g07890        |
| An15g07900        | 2              | 541           |            | Domain(s) with predicted electron carrier activity, heme binding, iron ion binding, oxidoreductase activity, acting on paired donors, with incorporation or reduction of molecular oxygen activity and role in oxidation-reduction process | n/a                    | An15g07900        |
| An15g07910        | 1              | 1121          |            | Domain(s) with predicted ACP phosphopantetheine attachment site binding involved in fatty acid biosynthetic process, ligase activity, phosphopantetheine binding activity                                                                  | n/a                    | An15g07910        |
| <b>An15g07920</b> | 0              | 0             |            | Protein required for ochratoxin A biosynthesis in black Aspergillus                                                                                                                                                                        | n/a                    | <b>An15g07920</b> |
| An15g07930        | -1             | 1032          |            | Domain(s) with predicted heme binding, nitric-oxide synthase activity and role in nitric oxide biosynthetic process, oxidation-reduction process                                                                                           | n/a                    | An15g07930        |

# An16g00600 cluster

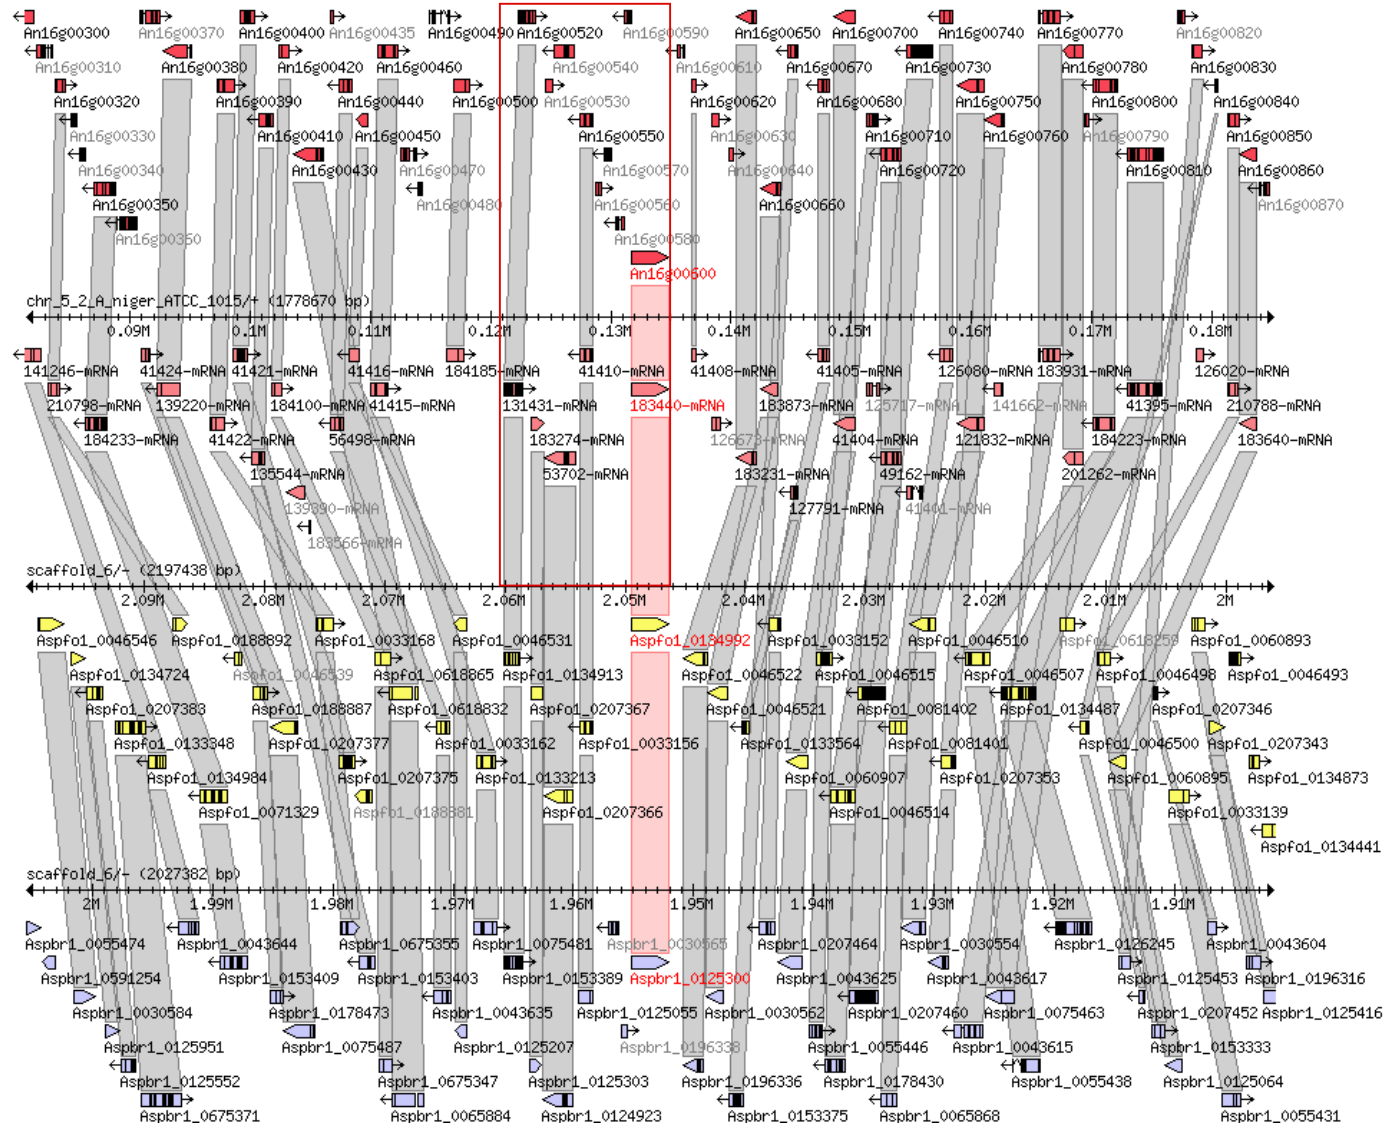

**An16g00600 cluster**

| Gene id (SMURF)   | Gene positions | Gene distance | AspGD name | AspGD description line or supplemental annotation                                                                                                                                                                                   | protein ID (antiSMASH) | AspGD ID          |            |
|-------------------|----------------|---------------|------------|-------------------------------------------------------------------------------------------------------------------------------------------------------------------------------------------------------------------------------------|------------------------|-------------------|------------|
| n/a               |                |               |            | Domain(s) with predicted role in transmembrane transport and integral to membrane localization                                                                                                                                      | prot_ID_707            | An16g00460        |            |
| n/a               |                |               |            |                                                                                                                                                                                                                                     | prot_ID_421            | An16g00470        |            |
| n/a               |                |               |            |                                                                                                                                                                                                                                     | prot_ID_457            | An16g00480        |            |
| n/a               |                |               |            |                                                                                                                                                                                                                                     | prot_ID_777            | An16g00490        |            |
| n/a               |                |               |            | Ortholog of A. acidus : Aspfo1_0126742<br>Ortholog of A. fumigatus Af293 : Afu3g10850, A. oryzae RIB40 : AO090102000071, N. fischeri NRRL 181 : NFIA_032600 and Aspergillus flavus NRRL 3357 : AFL2T_05184                          | prot_ID_415            | An16g00500        |            |
| An16g00520        | 8              | 779           |            | Domain(s) with predicted monooxygenase activity and role in oxidation-reduction process                                                                                                                                             | prot_ID_909            | An16g00520        | ECS        |
| An16g00530        | 7              | 149           |            | Domain(s) with predicted endodeoxyribonuclease activity, producing 5'-phosphomonoesters activity                                                                                                                                    | prot_ID_830            | An16g00530        |            |
| An16g00540        | 6              | 496           |            | Domain(s) with predicted catalytic activity                                                                                                                                                                                         | prot_ID_507            | An16g00540        |            |
| An16g00550        | 5              | 222           |            | Putative benzonitrilase                                                                                                                                                                                                             | prot_ID_325            | An16g00550        |            |
| An16g00560        | 4              | 313           |            | Protein of unknown function                                                                                                                                                                                                         | prot_ID_562            | An16g00560        |            |
| An16g00570        | 3              | 367           |            | Protein of unknown function                                                                                                                                                                                                         | prot_ID_878            | An16g00570        |            |
| An16g00580        | 2              | 37            |            | Protein of unknown function                                                                                                                                                                                                         | prot_ID_633            | An16g00580        |            |
| An16g00590        | 1              | 39            |            | Protein of unknown function<br>Domain(s) with predicted ACP phosphopantetheine attachment site binding involved in fatty acid biosynthetic process, L-aminoadipate-semialdehyde dehydrogenase activity, nucleotide binding activity | prot_ID_655            | An16g00590        |            |
| <b>An16g00600</b> | 0              | 0             |            |                                                                                                                                                                                                                                     | <b>prot_ID_739</b>     | <b>An16g00600</b> | <b>ECS</b> |
| An16g00610        | -1             | 761           |            |                                                                                                                                                                                                                                     | prot_ID_509            | An16g00610        |            |
| An16g00620        | -2             | 517           |            | Ortholog of A. niger ATCC 1015 : 41408-mRNA                                                                                                                                                                                         | prot_ID_178            | An16g00620        |            |
| An16g00630        | -3             | 1297          |            | Domain(s) with predicted peroxidase activity                                                                                                                                                                                        | prot_ID_774            | An16g00630        |            |
| An16g00640        | -4             | 866           |            |                                                                                                                                                                                                                                     | prot_ID_752            | An16g00640        |            |
| An16g00650        | -5             | 276           |            | Domain(s) with predicted role in transmembrane transport and integral to membrane localization                                                                                                                                      | prot_ID_101            | An16g00650        |            |
| An16g00660        | -6             | 318           |            | Ortholog of A. nidulans FGSC A4 : AN8162, A. fumigatus Af293 : Afu5g01210, A. oryzae RIB40 : AO090102000383, A. niger ATCC 1015 : 183873-mRNA and A. versicolor : Aspve1_0140072, Aspve1_0155676                                    | prot_ID_294            | An16g00660        |            |
| An16g00670        | -7             | 535           |            | Ortholog of A. brasiliensis : Aspbr1_0153375, Aspergillus carbonarius ITEM 5010 : Acar5010_206987 and Aspergillus aculeatus ATCC16872 : Aacu16872_042695                                                                            | prot_ID_398            | An16g00670        |            |

|            |     |      |                                                                                                                            |             |            |
|------------|-----|------|----------------------------------------------------------------------------------------------------------------------------|-------------|------------|
| An16g00680 | -8  | 1613 | Domain(s) with predicted role in response to stress and integral to membrane localization                                  | prot_ID_459 | An16g00680 |
| An16g00700 | -9  | 444  | Domain(s) with predicted 2 iron, 2 sulfur cluster binding, oxidoreductase activity and role in oxidation-reduction process | prot_ID_640 | An16g00700 |
| An16g00710 | -10 | 1014 | Domain(s) with predicted calcium ion binding activity                                                                      | prot_ID_913 | An16g00710 |
| An16g00720 | -11 | 161  | Domain(s) with predicted role in transmembrane transport and integral to membrane localization                             | prot_ID_889 | An16g00720 |
| An16g00730 | -12 | 481  | Domain(s) with predicted role in transmembrane transport and integral to membrane localization                             | prot_ID_205 | An16g00730 |
| An16g00740 | -13 | 545  | Domain(s) with predicted nucleotide binding activity                                                                       | n/a         | An16g00740 |

# An16g06720 cluster

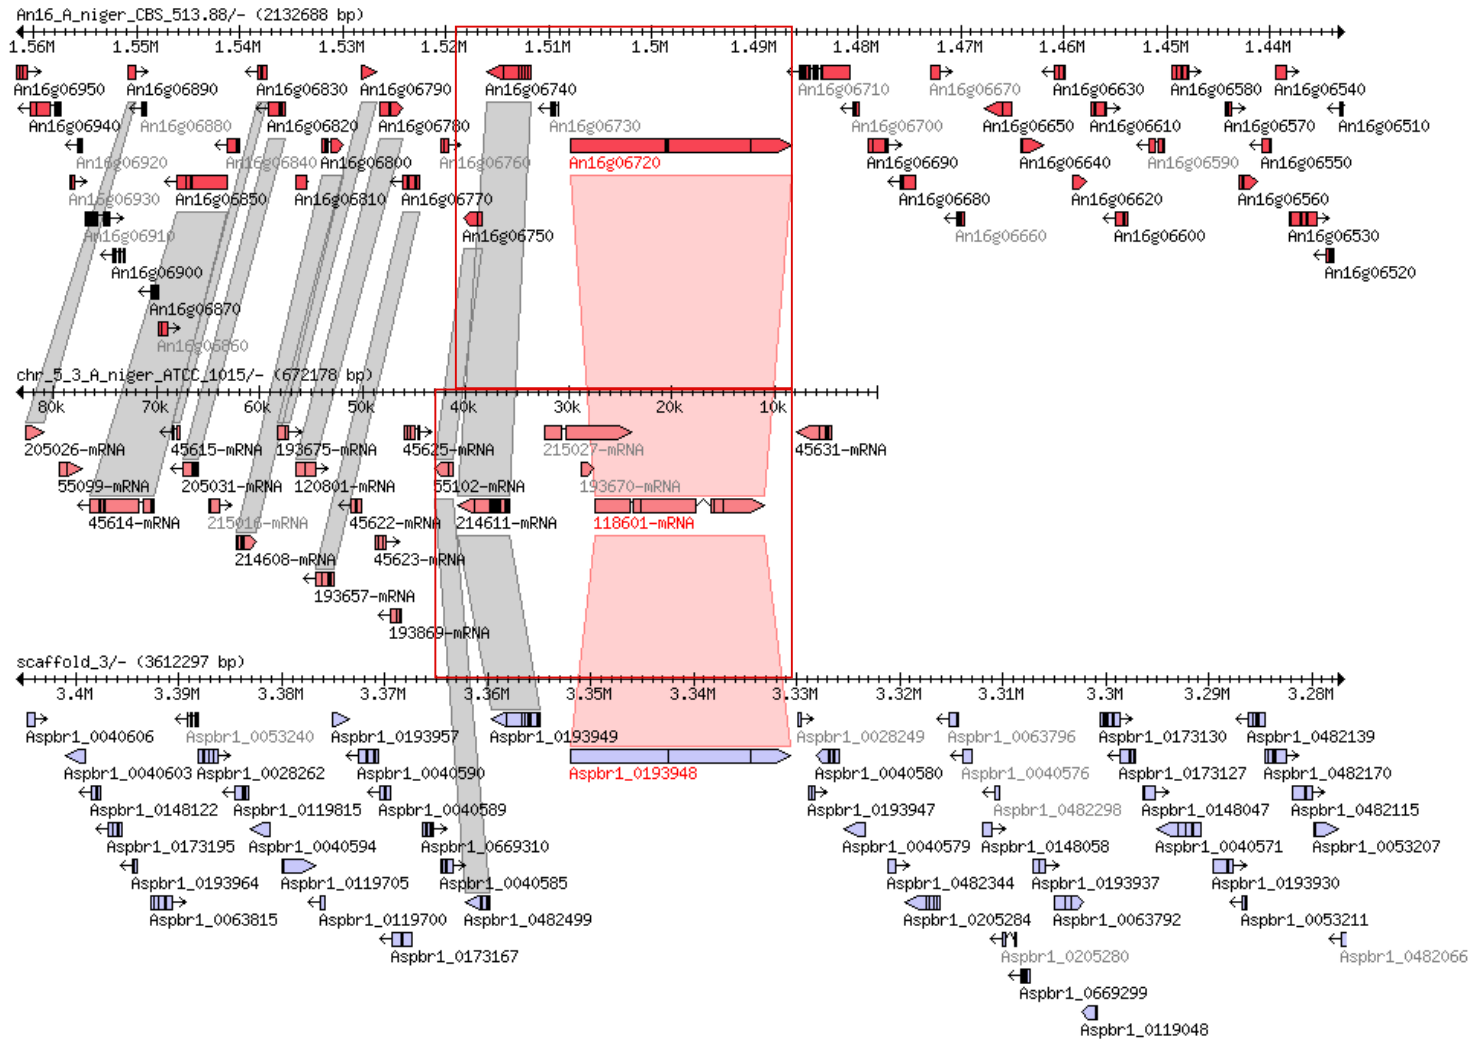



**An16g06720 cluster**

| Gene id (SMURF)   | Gene positions | Gene distance | AspGD name | AspGD description line or supplemental annotation                                                                                                                                                           | protein ID (antiSMASH) | AspGD ID              |
|-------------------|----------------|---------------|------------|-------------------------------------------------------------------------------------------------------------------------------------------------------------------------------------------------------------|------------------------|-----------------------|
| An16g06570        | 15             | 3530          |            | Ortholog of <i>A. brasiliensis</i> : Aspbr1_0207064, <i>A. niger</i> ATCC 1015 : 40897-mRNA and <i>Aspergillus carbonarius</i> ITEM 5010 : Acar5010_157234                                                  | n/a                    | An16g06570            |
| An16g06580        | 14             | 742           |            | Domain(s) with predicted substrate-specific transmembrane transporter activity, role in transmembrane transport and integral to membrane localization                                                       | n/a                    | An16g06580            |
| An16g06590        | 13             | 2118          |            | Domain(s) with predicted cation binding, glucosidase activity and role in carbohydrate metabolic process                                                                                                    | n/a                    | An16g06590            |
| An16g06600        | 12             | 803           |            | Putative beta-galactosidase                                                                                                                                                                                 | n/a                    | An16g06600            |
| An16g06610        | 11             | 456           |            | Domain(s) with predicted substrate-specific transmembrane transporter activity, role in transmembrane transport and integral to membrane localization                                                       | n/a                    | An16g06610            |
| An16g06620        | 10             | 820           |            | 1,4-Lactonase (gamma-lactonase)                                                                                                                                                                             | n/a                    | An16g06620            |
| An16g06630        | 9              | 830           |            | Domain(s) with predicted nucleotide binding, oxidoreductase activity and role in oxidation-reduction process                                                                                                | n/a                    | An16g06630            |
| An16g06640        | 8              | 941           |            | Domain(s) with predicted DNA binding, sequence-specific DNA binding RNA polymerase II transcription factor activity, sequence-specific DNA binding transcription factor activity, zinc ion binding activity | n/a                    | An16g06640            |
| An16g06650        | 7              | 1835          |            | Domain(s) with predicted DNA binding, sequence-specific DNA binding RNA polymerase II transcription factor activity, sequence-specific DNA binding transcription factor activity, zinc ion binding activity | prot_ID_267            | An16g06650            |
| An16g06660        | 6              | 1661          |            | Protein of unknown function                                                                                                                                                                                 | prot_ID_458            | An16g06660            |
| An16g06670        | 5              | 1458          |            | Protein of unknown function                                                                                                                                                                                 | prot_ID_425            | An16g06670            |
| An16g06680        | 4              | 1087          |            | Ortholog of <i>A. oryzae</i> RIB40 : AO090011000713 and <i>Aspergillus flavus</i> NRRL 3357 : AFL2T_05446                                                                                                   | prot_ID_168            | An16g06680            |
| An16g06690        | 3              | 840           |            | Domain(s) with predicted catalytic activity and role in nucleoside metabolic process                                                                                                                        | prot_ID_286            | An16g06690            |
| An16g06700        | 2              | 98            |            | Protein of unknown function                                                                                                                                                                                 | prot_ID_308            | An16g06700            |
| An16g06710        | 1              | 859           |            | Protein of unknown function                                                                                                                                                                                 | prot_ID_198            | An16g06710            |
| <b>An16g06720</b> | 0              | 0             |            | <b>Ortholog(s) have role in brevianamide F biosynthetic process, emericellamide biosynthetic process, pathogenesis, secondary metabolite biosynthetic process, spore germination</b>                        | <b>prot_ID_855</b>     | <b>An16g06720</b> ECS |

|            |    |      |                                                                                                                                                                                                                                                                                                                                                                                                                                                                                                                                                                                                                                                                                                                                                                                                                                                                                                                       |             |            |     |
|------------|----|------|-----------------------------------------------------------------------------------------------------------------------------------------------------------------------------------------------------------------------------------------------------------------------------------------------------------------------------------------------------------------------------------------------------------------------------------------------------------------------------------------------------------------------------------------------------------------------------------------------------------------------------------------------------------------------------------------------------------------------------------------------------------------------------------------------------------------------------------------------------------------------------------------------------------------------|-------------|------------|-----|
| An16g06730 | -1 | 1232 | <p><b>Questionable ORF</b><br/> Similar to cadmium resistance protein; expression repressed by tunicamycin and DTT<br/> Protein with similarity to D-stereospecific aminopeptidase; acid protease; expression induced by tunicamycin and DTT</p> <p>Domain(s) with predicted role in response to stress and integral to membrane localization</p> <p>Domain(s) with predicted role in transmembrane transport and integral to membrane localization</p> <p>Domain(s) with predicted DNA binding, sequence-specific DNA binding RNA polymerase II transcription factor activity, sequence-specific DNA binding transcription factor activity, zinc ion binding activity</p> <p>Ortholog of <i>A. nidulans</i> FGSC A4 : AN2394, <i>A. niger</i> CBS 513.88 : An03g06300, <i>A. oryzae</i> RIB40 : AO090010000576, <i>A. brasiliensis</i> : Aspbr1_0201554 and <i>A. niger</i> ATCC 1015 : 191411-mRNA, 193675-mRNA</p> | prot_ID_664 | An16g06730 |     |
| An16g06740 | -2 | 1917 |                                                                                                                                                                                                                                                                                                                                                                                                                                                                                                                                                                                                                                                                                                                                                                                                                                                                                                                       | prot_ID_620 | An16g06740 |     |
| An16g06750 | -3 | 652  |                                                                                                                                                                                                                                                                                                                                                                                                                                                                                                                                                                                                                                                                                                                                                                                                                                                                                                                       | prot_ID_605 | An16g06750 | ECS |
| An16g06760 | -4 | 1442 |                                                                                                                                                                                                                                                                                                                                                                                                                                                                                                                                                                                                                                                                                                                                                                                                                                                                                                                       | prot_ID_553 | An16g06760 |     |
| An16g06770 | -5 | 2102 |                                                                                                                                                                                                                                                                                                                                                                                                                                                                                                                                                                                                                                                                                                                                                                                                                                                                                                                       | prot_ID_669 | An16g06770 |     |
| An16g06780 | -6 | 97   |                                                                                                                                                                                                                                                                                                                                                                                                                                                                                                                                                                                                                                                                                                                                                                                                                                                                                                                       | prot_ID_77  | An16g06780 |     |
| n/a        |    |      | prot_ID_496                                                                                                                                                                                                                                                                                                                                                                                                                                                                                                                                                                                                                                                                                                                                                                                                                                                                                                           | An16g06790  |            |     |

## An18g00520 cluster

Second rare *A. carbonarius* cluster match

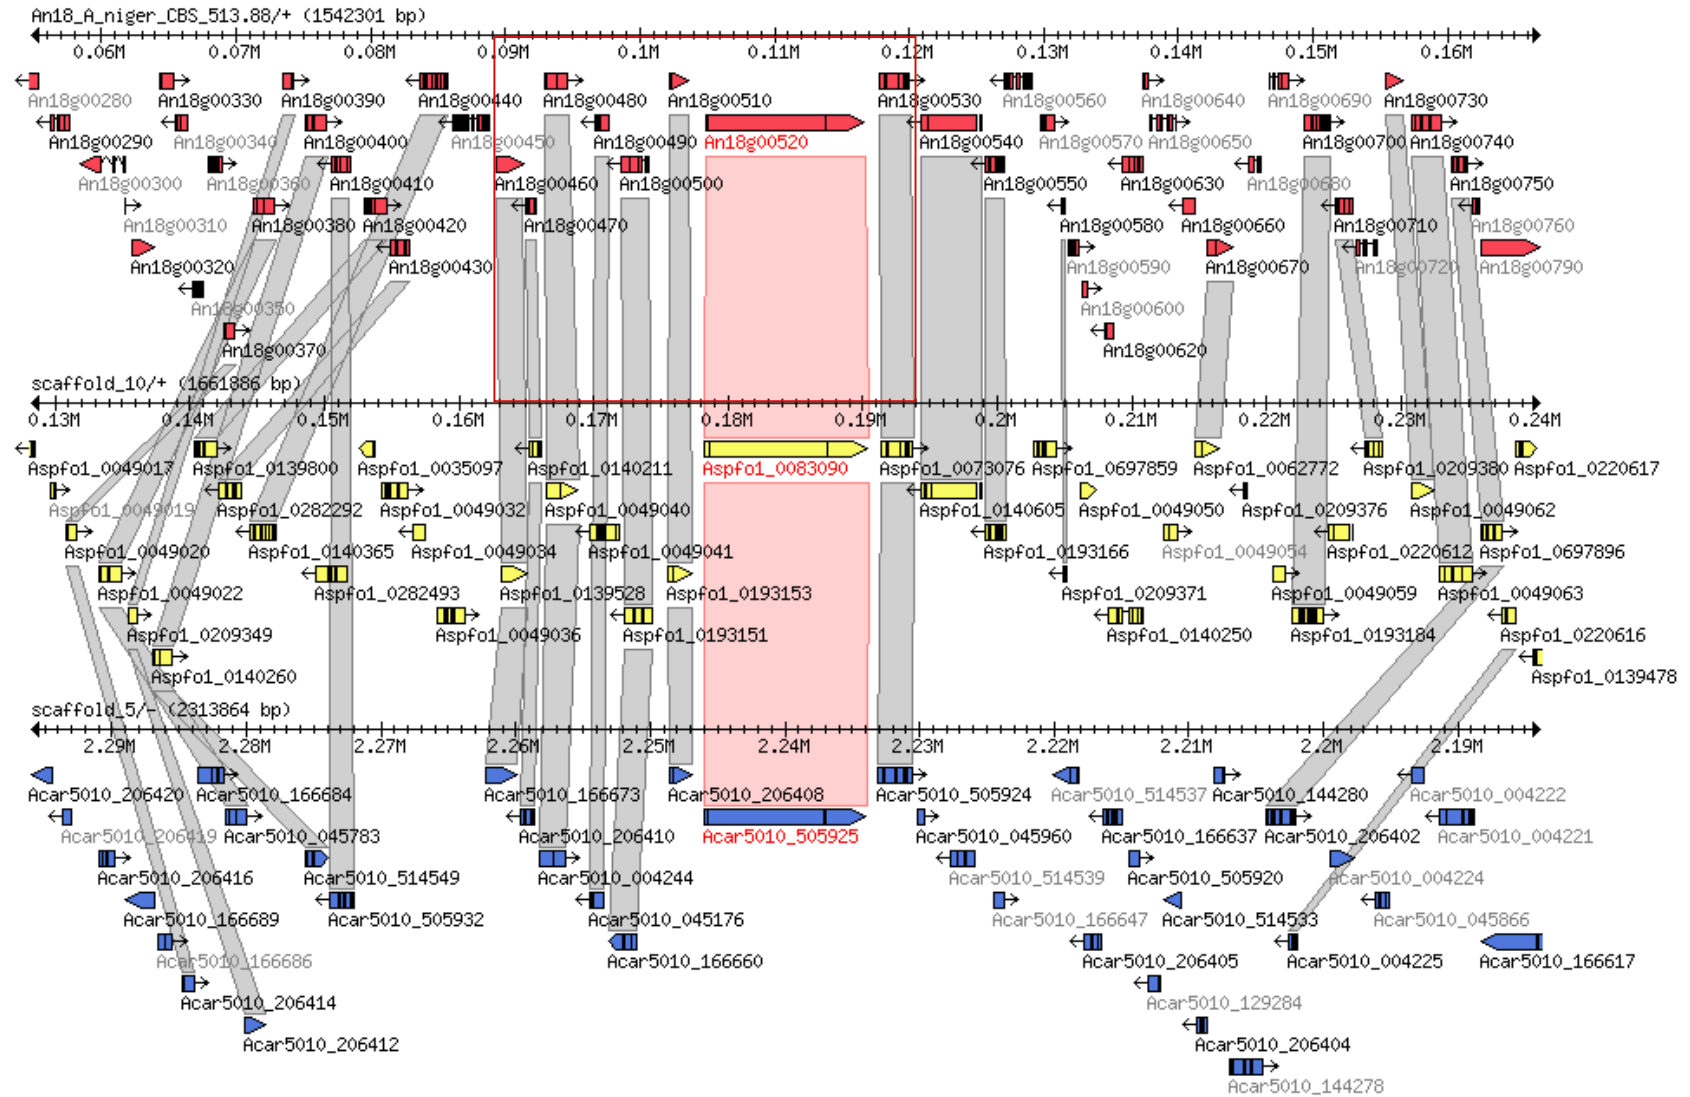

**An18g00520 cluster**

| Gene id (SMURF) | Gene positions | Gene distance | AspGD name | AspGD description line or supplemental annotation                                                                                                                                                                                                                                                                        | protein ID (antiSMASH) | AspGD ID   |     |
|-----------------|----------------|---------------|------------|--------------------------------------------------------------------------------------------------------------------------------------------------------------------------------------------------------------------------------------------------------------------------------------------------------------------------|------------------------|------------|-----|
| An18g00350      | 17             | 356           |            |                                                                                                                                                                                                                                                                                                                          | n/a                    | An18g00350 |     |
| An18g00360      | 16             | 193           |            |                                                                                                                                                                                                                                                                                                                          | n/a                    | An18g00360 |     |
| An18g00370      | 15             | 1388          |            | Ortholog of <i>A. niger</i> CBS 513.88 : An04g06750, <i>A. brasiliensis</i> : Aspbr1_0033619, Aspbr1_0047824, <i>A. acidus</i> : Aspfo1_0049020 and <i>A. niger</i> ATCC 1015 : 54072-mRNA                                                                                                                               | n/a                    | An18g00370 |     |
| An18g00380      | 14             | 464           |            | Domain(s) with predicted role in transmembrane transport and integral to membrane localization<br>Ortholog of <i>A. nidulans</i> FGSC A4 : AN3872, AN5090, <i>A. fumigatus</i> Af293 : Afu1g01360, <i>A. niger</i> ATCC 1015 : 127004-mRNA, <i>A. versicolor</i> : Aspve1_0041846 and <i>A. sydowii</i> : Aspsy1_0121091 | n/a                    | An18g00380 |     |
| An18g00390      | 13             | 848           |            |                                                                                                                                                                                                                                                                                                                          | n/a                    | An18g00390 |     |
| An18g00400      | 12             | 232           |            | Putative inorganic phosphate transporter<br>Ortholog of <i>A. nidulans</i> FGSC A4 : AN3982, <i>A. oryzae</i> RIB40 : AO090003000863, <i>A. niger</i> ATCC 1015 : 187009-mRNA, <i>Aspergillus flavus</i> NRRL 3357 : AFL2T_02158 and <i>A. versicolor</i> : Aspve1_0188186                                               | n/a                    | An18g00400 |     |
| An18g00410      | 11             | 1090          |            | Ortholog of <i>A. brasiliensis</i> : Aspbr1_0047280, <i>A. acidus</i> : Aspfo1_0139800, <i>A. niger</i> ATCC 1015 : 123450-mRNA and <i>Aspergillus carbonarius</i> ITEM 5010 : Acar5010_011222                                                                                                                           | n/a                    | An18g00410 |     |
| An18g00420      | 10             | 277           |            | Ortholog of <i>A. nidulans</i> FGSC A4 : AN11159, <i>A. niger</i> CBS 513.88 : An01g01220, <i>A. brasiliensis</i> : Aspbr1_0058364, <i>A. niger</i> ATCC 1015 : 188035-mRNA and <i>A. clavatus</i> NRRL 1 : ACLA_074330                                                                                                  | n/a                    | An18g00420 |     |
| An18g00430      | 9              | 877           |            | Domain(s) with predicted substrate-specific transmembrane transporter activity, role in transmembrane transport and integral to membrane localization                                                                                                                                                                    | n/a                    | An18g00430 |     |
| An18g00440      | 8              | 483           |            |                                                                                                                                                                                                                                                                                                                          | prot_ID_43             | An18g00440 |     |
| An18g00450      | 7              | 462           |            |                                                                                                                                                                                                                                                                                                                          | prot_ID_658            | An18g00450 |     |
| An18g00460      | 6              | 157           |            | Ortholog of <i>A. nidulans</i> FGSC A4 : AN2818, <i>A. niger</i> CBS 513.88 : An12g03370, An07g00580, <i>A. oryzae</i> RIB40 : AO090103000478, <i>A. niger</i> ATCC 1015 : 180130-mRNA and <i>A. versicolor</i> : Aspve1_0051884                                                                                         | prot_ID_207            | An18g00460 | ECS |
| An18g00470      | 5              | 535           |            | Domain(s) with predicted hydrolase activity                                                                                                                                                                                                                                                                              | prot_ID_100            | An18g00470 |     |
| An18g00480      | 4              | 1991          |            | Domain(s) with predicted role in transmembrane transport and integral to membrane localization                                                                                                                                                                                                                           | prot_ID_53             | An18g00480 |     |
| An18g00490      | 3              | 923           |            | Domain(s) with predicted monooxygenase activity and role in oxidation-reduction process                                                                                                                                                                                                                                  | prot_ID_469            | An18g00490 |     |

|                   |    |      |                                                                                                                                                                                                                            |                    |                   |     |
|-------------------|----|------|----------------------------------------------------------------------------------------------------------------------------------------------------------------------------------------------------------------------------|--------------------|-------------------|-----|
| An18g00500        | 2  | 1489 | Domain(s) with predicted electron carrier activity, heme binding, iron ion binding, monooxygenase activity, oxidoreductase activity, acting on paired donors, with incorporation or reduction of molecular oxygen activity | prot_ID_132        | An18g00500        |     |
| An18g00510        | 1  | 1327 | Domain(s) with predicted UDP-N-acetylmuramate dehydrogenase activity, flavin adenine dinucleotide binding activity and role in oxidation-reduction process                                                                 | prot_ID_383        | An18g00510        |     |
| <b>An18g00520</b> | 0  | 0    | Domain(s) with predicted ACP phosphopantetheine attachment site binding involved in fatty acid biosynthetic process, ligase activity, nucleotide binding and oxidoreductase activity, more                                 | <b>prot_ID_101</b> | <b>An18g00520</b> |     |
| An18g00530        | -1 | 1078 | Domain(s) with predicted choline dehydrogenase activity, flavin adenine dinucleotide binding, nucleotide binding activity and role in alcohol metabolic process, oxidation-reduction process                               | prot_ID_31         | An18g00530        | ECS |
| An18g00540        | -2 | 761  | Domain(s) with predicted catalytic activity and role in nucleoside metabolic process                                                                                                                                       | prot_ID_475        | An18g00540        |     |
| An18g00550        | -3 | 211  | Domain(s) with predicted O-methyltransferase activity, protein dimerization activity                                                                                                                                       | prot_ID_153        | An18g00550        |     |
| n/a               |    |      |                                                                                                                                                                                                                            | prot_ID_483        | An18g00560        |     |
| n/a               |    |      |                                                                                                                                                                                                                            | prot_ID_124        | An18g00570        |     |
| n/a               |    |      | Ortholog of A. acidus : Aspfo1_0209371                                                                                                                                                                                     | prot_ID_582        | An18g00580        |     |
| n/a               |    |      |                                                                                                                                                                                                                            | prot_ID_136        | An18g00590        |     |
| n/a               |    |      |                                                                                                                                                                                                                            | prot_ID_12         | An18g00600        |     |
| n/a               |    |      | Domain(s) with predicted transporter activity, role in transport and membrane localization                                                                                                                                 | prot_ID_373        | An18g00620        |     |
| n/a               |    |      | Ortholog of Aspergillus carbonarius ITEM 5010 : Acar5010_206398 and Aspergillus aculeatus ATCC16872 : Aacu16872_064631                                                                                                     | prot_ID_577        | An18g00630        |     |
| n/a               |    |      | Domain(s) with predicted role in intracellular protein transport, vesicle-mediated transport and Golgi apparatus part, clathrin adaptor complex localization                                                               | prot_ID_284        | An18g05740        |     |
| n/a               |    |      | Ortholog of A. nidulans FGSC A4 : AN5711, A. fumigatus Af293 : Afu1g06690, A. oryzae RIB40 : AO090001000465, A. niger ATCC 1015 : 202631-mRNA and A. versicolor : Aspve1_0053488                                           | prot_ID_640        | An18g05750        |     |
| n/a               |    |      | Ortholog(s) have role in response to endoplasmic reticulum stress                                                                                                                                                          | prot_ID_317        | An18g05760        |     |
| n/a               |    |      | Domain(s) with predicted ATP binding, unfolded protein binding activity and role in protein folding                                                                                                                        | prot_ID_332        | An18g05770        |     |
| n/a               |    |      | Ortholog of A. nidulans FGSC A4 : AN2554, A. fumigatus Af293 : Afu1g06730, A. oryzae RIB40 : AO090001000761, A. niger ATCC 1015 : 42981-mRNA and A. versicolor : Aspve1_0026511                                            | prot_ID_455        | An18g05780        |     |

|     |                                                                                                                                                                                                                                                       |             |            |
|-----|-------------------------------------------------------------------------------------------------------------------------------------------------------------------------------------------------------------------------------------------------------|-------------|------------|
| n/a | Domain(s) with predicted nucleic acid binding, zinc ion binding activity<br>Ortholog of <i>A. nidulans</i> FGSC A4 : AN5714, <i>A. fumigatus</i> Af293 : Afu1g06762, <i>A. oryzae</i> RIB40 : AO090001000477, <i>A. niger</i> ATCC 1015 : 187314-mRNA | prot_ID_130 | An18g05790 |
| n/a | and <i>A. versicolor</i> : Aspve1_0042424                                                                                                                                                                                                             | prot_ID_305 | An18g05800 |
| n/a | Protein with similarity to cytoplasmic ribosomal protein of the small subunit S26                                                                                                                                                                     | prot_ID_44  | An18g05810 |
| n/a | Domain(s) with predicted catalytic activity and role in metabolic process                                                                                                                                                                             | prot_ID_73  | An18g05820 |

Abbreviations: ECS, end of cluster syntenly; IGD, increase in intergenic distance; FA, change in functional annotation; ED, experimentally determined
