# Supplementary material for: Comprehensive annotation of secondary metabolite biosynthetic genes and gene clusters of Aspergillus nidulans, A. fumigatus, A. niger and A. oryzae
Source: PubMed Central journal article supplement (PMC3689640; doi:10.1186/1471-2180-13-91), 2013-04-26
Supplement: 1471-2180-13-91-S5.pdf [file 1471-2180-13-91-S5.pdf]

## **Additional file 5**

**Comprehensive annotation of secondary metabolite biosynthetic genes and gene clusters of *Aspergillus nidulans*, *A. fumigatus*, *A. niger* and *A. oryzae***

Diane O. Inglis, Jon Binkley, Marek Skrzypek, Martha B. Arnaud, Gustavo Cerqueira, Prach Shah, Farrell Wymore,  
Jennifer R. Wortman and Gavin Sherlock

Abbreviations: ECS, end of cluster synteny; IGD, increase in intergenic distance; FA, change in functional annotation; ED, experimentally determined

## Csypyrone B1 cluster

Experimentally determined cluster

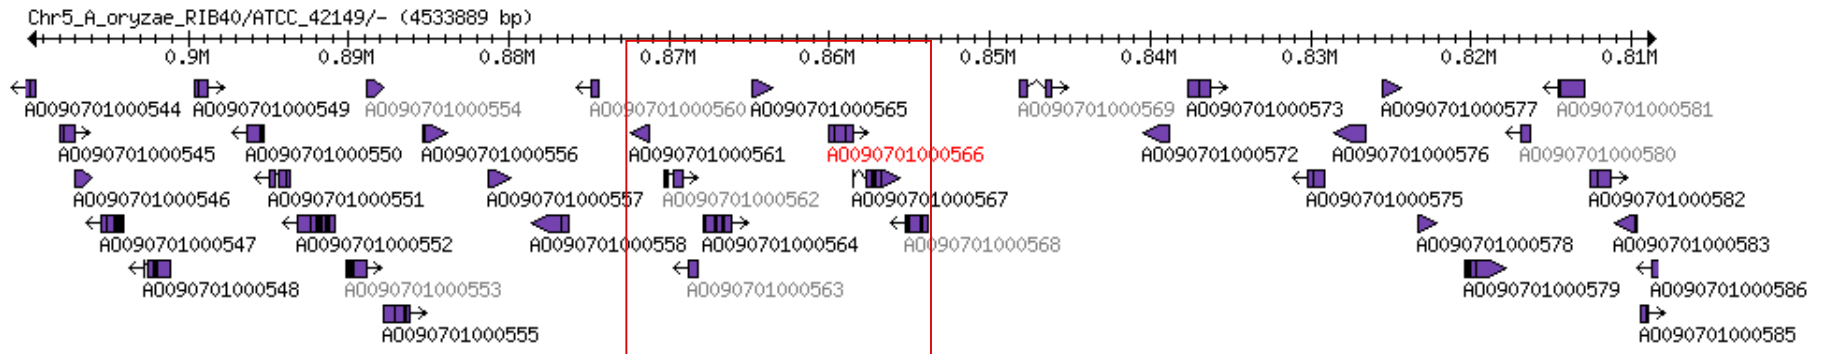

| Gene id (SMURF) | Gene positions | Gene distance | Gene Name | Annotated_gene_function                                                          | antiSMASH ID        | AspGD ID              |    |
|-----------------|----------------|---------------|-----------|----------------------------------------------------------------------------------|---------------------|-----------------------|----|
| n/a             |                |               |           | Protein of unknown function                                                      | prot_ID_517         | AO090701000569        |    |
| n/a             |                |               |           | Protein of unknown function                                                      | prot_ID_32          | AO090701000560        |    |
| n/a             |                |               |           | Putative oxidoreductase                                                          | prot_ID_1143        | AO090701000561        | ED |
| n/a             |                |               |           | Putative dioxygenase                                                             | prot_ID_696         | AO090701000562        |    |
| n/a             |                |               |           | Protein of unknown function                                                      | prot_ID_268         | AO090701000563        |    |
| n/a             |                |               |           | Putative aminopeptidase or acyl esterase                                         | prot_ID_741         | AO090701000564        |    |
| n/a             |                |               |           | Domain(s) with predicted zinc ion binding activity                               | prot_ID_585         | AO090701000565        |    |
| n/a             |                |               | cysB      | Putative type III polyketide synthase; responsible for csypyrone B1 biosynthesis | <b>prot_ID_1397</b> | <b>AO090701000566</b> |    |
| n/a             |                |               |           | Putative transporter                                                             | prot_ID_703         | AO090701000567        |    |
| n/a             |                |               |           | Putative TolB protein                                                            | prot_ID_1167        | AO090701000568        | ED |

## Dipeptidyl Peptidase IV 2 Inhibitor (WYK-1) cluster

Experimentally determined cluster

1041045516891\_A\_flavus\_NRRL\_3557/- (2076547 bp)

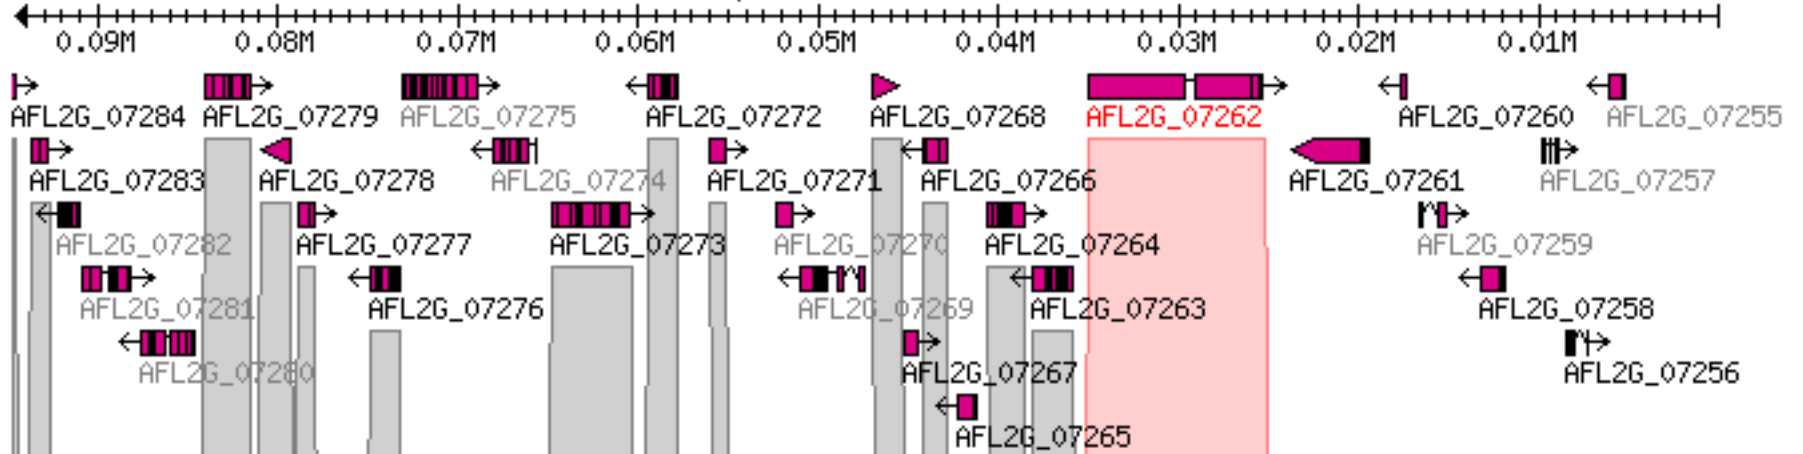

Chr2\_A\_oryzae\_RIB40/ATCC\_42149/- (6264705 bp)

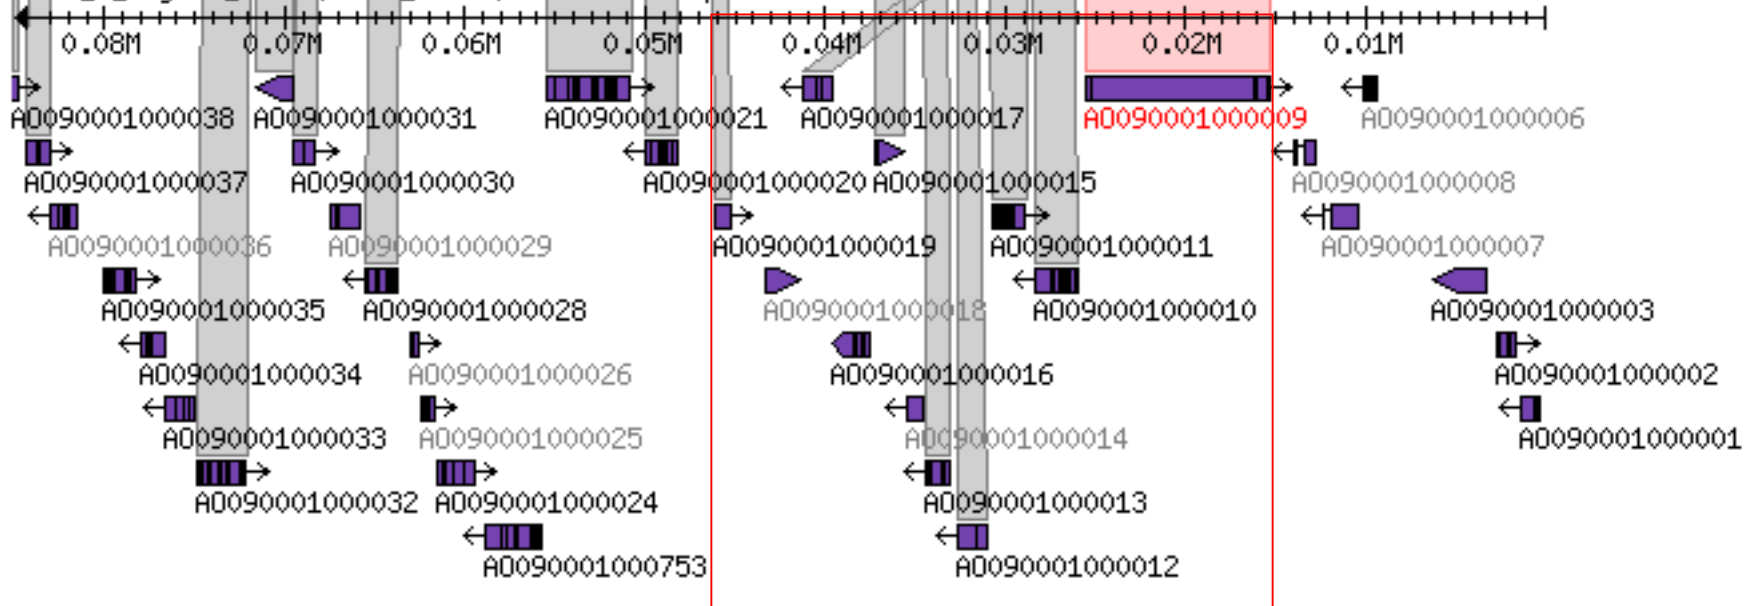

**Dipeptidyl Peptidase IV 2 Inhibitor (WYK-1) cluster**

| Gene id (SMURF) | Gene positions | Gene distance | Gene Name | Annotated_gene_function                                                                                                                                                                                                                    | antiSMASH ID | AspGD ID       |    |
|-----------------|----------------|---------------|-----------|--------------------------------------------------------------------------------------------------------------------------------------------------------------------------------------------------------------------------------------------|--------------|----------------|----|
| AO090001000031  | -20            | 467           |           | Domain(s) with predicted role in transmembrane transport and integral to membrane localization                                                                                                                                             | n/a          | AO090001000031 |    |
| AO090001000030  | -19            | 1305          |           | Ortholog of gliK, involved in gliotoxin biosynthesis                                                                                                                                                                                       | n/a          | AO090001000030 |    |
| AO090001000029  | -18            | 104           |           | Domain(s) with predicted sequence-specific DNA binding RNA polymerase II transcription factor activity, zinc ion binding activity, role in regulation of transcription, DNA-dependent and nucleus localization                             | n/a          | AO090001000029 |    |
| AO090001000028  | -17            | 778           |           | Cytochrome P450 monooxygenase                                                                                                                                                                                                              | n/a          | AO090001000028 |    |
| AO090001000026  | -16            | 131           |           | Domain(s) with predicted electron carrier activity, heme binding, iron ion binding, oxidoreductase activity, acting on paired donors, with incorporation or reduction of molecular oxygen activity and role in oxidation-reduction process | n/a          | AO090001000026 |    |
| AO090001000025  | -15            | 202           |           | Domain(s) with predicted electron carrier activity, heme binding, iron ion binding, monooxygenase activity, oxidoreductase activity, acting on paired donors, with incorporation or reduction of molecular oxygen activity                 | n/a          | AO090001000025 |    |
| AO090001000024  | -14            | 1000          |           | Domain(s) with predicted oxidoreductase activity and role in metabolic process                                                                                                                                                             | n/a          | AO090001000024 |    |
| AO090001000753  | -13            | 468           |           | Domain(s) with predicted DNA binding, sequence-specific DNA binding RNA polymerase II transcription factor activity, zinc ion binding activity and role in regulation of transcription, DNA-dependent, transcription, DNA-dependent        | n/a          | AO090001000753 |    |
| AO090001000021  | -12            | 843           |           | Domain(s) with predicted ATP binding, ATPase activity, coupled to transmembrane movement of substances activity, role in transmembrane transport and integral to membrane localization                                                     | n/a          | AO090001000021 |    |
| AO090001000020  | -11            | 2034          |           | Domain(s) with predicted role in transmembrane transport and integral to membrane localization                                                                                                                                             | n/a          | AO090001000020 |    |
| AO090001000019  | -10            | 2086          | wykD      | Haloacid dehalogenase, type II; putative member of the WYK-1 (Dipeptidyl Peptidase IV 2 Inhibitor) gene cluster                                                                                                                            | prot_ID_1063 | AO090001000019 | ED |
| AO090001000018  | -9             | 427           | wykR      | C6 finger domain protein; putative member of the WYK-1 (Dipeptidyl Peptidase IV 2 Inhibitor) gene cluster                                                                                                                                  | prot_ID_1468 | AO090001000018 |    |
| AO090001000017  | -8             | 710           | wykC      | Putative iron / ascorbate dependent oxidoreductase; putative member of the WYK-1 (Dipeptidyl Peptidase IV 2 Inhibitor) gene cluster                                                                                                        | prot_ID_932  | AO090001000017 |    |
| AO090001000016  | -7             | 444           |           | Domain(s) with predicted transporter activity, role in oligopeptide transport and membrane localization                                                                                                                                    | prot_ID_1237 | AO090001000016 |    |
| AO090001000015  | -6             | 398           | wykB      | Putative FAD-dependent oxidoreductase; putative member of the WYK-1 (Dipeptidyl Peptidase IV 2 Inhibitor) gene cluster                                                                                                                     | prot_ID_609  | AO090001000015 |    |
| AO090001000014  | -5             | 285           | wykI      | Putative O-methyltransferase; putative member of the WYK-1 (Dipeptidyl Peptidase IV 2 Inhibitor) gene cluster                                                                                                                              | prot_ID_1030 | AO090001000014 |    |

|                       |    |     |      |                                                                                                              |              |                |    |
|-----------------------|----|-----|------|--------------------------------------------------------------------------------------------------------------|--------------|----------------|----|
| AO090001000013        | -4 | 537 | wykJ | N-methyltransferase; putative member of the WYK-1 (Dipeptidyl Peptidase IV 2 Inhibitor) gene cluster         | prot_ID_64   | AO090001000013 |    |
| AO090001000012        | -3 | 644 | wykJ | Putative oxidase; putative member of the WYK-1 (Dipeptidyl Peptidase IV 2 Inhibitor) gene cluster            | prot_ID_825  | AO090001000012 |    |
| AO090001000011        | -2 | 491 | wykJ | Oligopeptide transporter; putative member of the WYK-1 (Dipeptidyl Peptidase IV 2 Inhibitor) gene cluster    | prot_ID_242  | AO090001000011 |    |
| AO090001000010        | -1 | 430 | wykJ | Putative phenol hydroxylase; putative member of the WYK-1 (Dipeptidyl Peptidase IV 2 Inhibitor) gene cluster | prot_ID_707  | AO090001000010 |    |
| <b>AO090001000009</b> | 0  | 0   | wykJ | Non-ribosomal peptide synthase (NRPS) involved in the synthesis of a dipeptidyl peptidase IV 2 inhibitor     | prot_ID_140  | AO090001000009 | ED |
| n/a                   |    |     |      | Protein of unknown function                                                                                  | prot_ID_357  | AO090001000008 |    |
| n/a                   |    |     |      |                                                                                                              | prot_ID_986  | AO090001000007 |    |
| n/a                   |    |     |      |                                                                                                              | prot_ID_1583 | AO090001000006 |    |
| n/a                   |    |     |      |                                                                                                              | prot_ID_1543 | AO090001000003 |    |
| n/a                   |    |     |      |                                                                                                              | prot_ID_243  | AO090001000002 |    |
| n/a                   |    |     |      |                                                                                                              | prot_ID_1686 | AO090001000001 |    |

## AO9000100043 cluster

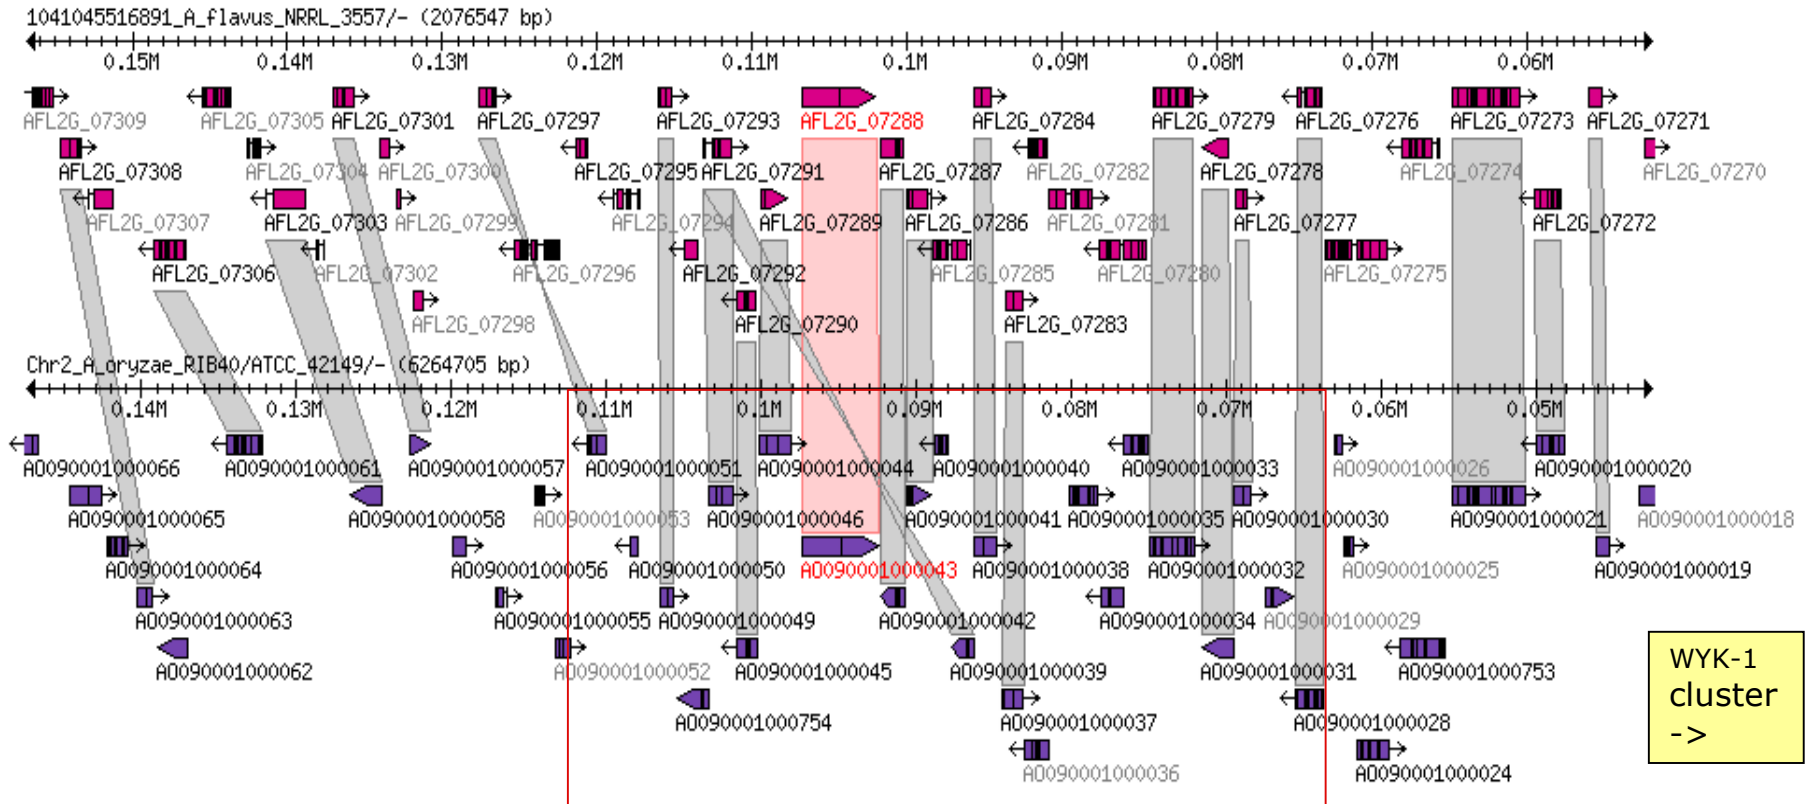

**AO090001000043 cluster**

| Gene id (SMURF)       | Gene positions | Gene distance | Gene Name | Annotated_gene_function                                                                                                                                                                               | antiSMASH ID | AspGD ID       |
|-----------------------|----------------|---------------|-----------|-------------------------------------------------------------------------------------------------------------------------------------------------------------------------------------------------------|--------------|----------------|
| n/a                   |                |               |           | Ortholog of A. flavus NRRL 3357 : AFL2T_02252, A. terreus NIH2624 : ATET_07085 and A. carbonarius ITEM 5010 : Acar5010_405538                                                                         | prot_ID_384  | AO090001000055 |
| n/a                   |                |               |           | Protein of unknown function                                                                                                                                                                           | prot_ID_1452 | AO090001000053 |
| n/a                   |                |               |           | Protein of unknown function                                                                                                                                                                           | prot_ID_615  | AO090001000052 |
| AO090001000051        | -7             | 1728          |           | Domain(s) with predicted nucleotide binding, oxidoreductase activity and role in oxidation-reduction process                                                                                          | prot_ID_1640 | AO090001000051 |
| AO090001000050        | -6             | 1381          |           | Ortholog of A. niger CBS 513.88 : An05g01820, A. oryzae RIB40 : AO090023000143, A. brasiliensis : Aspbr1_0049118 and A. flavus NRRL 3357 : AFL2T_04033                                                | prot_ID_794  | AO090001000050 |
| AO090001000049        | -5             | 798           |           | Domain(s) with predicted nucleotide binding, oxidoreductase activity and role in oxidation-reduction process                                                                                          | prot_ID_1700 | AO090001000049 |
| AO090001000754        | -4             | 58            |           | Ortholog of Aspergillus clavatus NRRL 1 : ACLA_066670                                                                                                                                                 | prot_ID_1972 | AO090001000754 |
| AO090001000046        | -3             | 263           |           | Domain(s) with predicted O-methyltransferase activity                                                                                                                                                 | prot_ID_217  | AO090001000046 |
| AO090001000045        | -2             | 248           |           | Domain(s) with predicted nucleobase transmembrane transporter activity, role in nucleobase transport and membrane localization                                                                        | prot_ID_1280 | AO090001000045 |
| AO090001000044        | -1             | 805           |           | Non-ribosomal peptide synthetase                                                                                                                                                                      | prot_ID_218  | AO090001000044 |
| <b>AO090001000043</b> | 0              | 0             |           | Domain(s) with predicted dipeptidase activity, dipeptidyl-peptidase activity, metalloexopeptidase activity and role in proteolysis                                                                    | prot_ID_1283 | AO090001000043 |
| AO090001000042        | 1              | 303           |           | Cytochrome P450 monooxygenase                                                                                                                                                                         | prot_ID_423  | AO090001000042 |
| AO090001000041        | 2              | 226           |           | Ortholog(s) have glutathione transferase activity and role in gliotoxin biosynthetic process                                                                                                          | prot_ID_661  | AO090001000041 |
| AO090001000040        | 3              | 131           |           | Domain(s) with predicted O-methyltransferase activity, sequence-specific DNA binding transcription factor activity, role in regulation of transcription, DNA-dependent and intracellular localization | prot_ID_1726 | AO090001000040 |
| AO090001000039        | 4              | 195           |           | Domain(s) with predicted oxidoreductase activity and role in oxidation-reduction process                                                                                                              | prot_ID_138  | AO090001000039 |
| AO090001000038        | 5              | 171           |           | Ortholog(s) have flavin adenine dinucleotide binding activity and role in cellular response to mycotoxin, gliotoxin biosynthetic process                                                              | prot_ID_1265 | AO090001000038 |
| AO090001000037        | 6              | 964           |           | Protein of unknown function                                                                                                                                                                           | prot_ID_291  | AO090001000037 |
| AO090001000036        | 7              | 427           |           | Cytochrome P450; upregulated by exposure to benomyl                                                                                                                                                   | prot_ID_1059 | AO090001000036 |
| AO090001000035        | 8              | 1576          |           | Ortholog of A. clavatus NRRL 1 : ACLA_066780                                                                                                                                                          | prot_ID_209  | AO090001000035 |
| AO090001000034        | 9              | 195           |           |                                                                                                                                                                                                       | prot_ID_612  | AO090001000034 |

ECS,  
FA



|                |    |      |                                                                                                                                                                                                                                            |              |                |
|----------------|----|------|--------------------------------------------------------------------------------------------------------------------------------------------------------------------------------------------------------------------------------------------|--------------|----------------|
| AO090001000033 | 10 | 155  | Ortholog(s) have carbon-sulfur lyase activity and role in gliotoxin biosynthetic process                                                                                                                                                   | prot_ID_1797 | AO090001000033 |
| AO090001000032 | 11 | 239  | Domain(s) with predicted ATP binding, ATPase activity, coupled to transmembrane movement of substances activity, role in transmembrane transport and integral to membrane localization                                                     | prot_ID_389  | AO090001000032 |
| AO090001000031 | 12 | 601  | Domain(s) with predicted role in transmembrane transport and integral to membrane localization                                                                                                                                             | n/a          | AO090001000031 |
| AO090001000030 | 13 | 467  | Ortholog(s) have role in gliotoxin biosynthetic process                                                                                                                                                                                    | n/a          | AO090001000030 |
|                |    |      | Domain(s) with predicted sequence-specific DNA binding RNA polymerase II transcription factor activity, zinc ion binding activity, role in regulation of transcription, DNA-dependent and nucleus localization                             |              |                |
| AO090001000029 | 14 | 1305 |                                                                                                                                                                                                                                            | n/a          | AO090001000029 |
| AO090001000028 | 15 | 104  | Cytochrome P450 monooxygenase                                                                                                                                                                                                              | n/a          | AO090001000028 |
|                |    |      | Domain(s) with predicted electron carrier activity, heme binding, iron ion binding, oxidoreductase activity, acting on paired donors, with incorporation or reduction of molecular oxygen activity and role in oxidation-reduction process |              |                |
| AO090001000026 | 16 | 778  |                                                                                                                                                                                                                                            | n/a          | AO090001000026 |
|                |    |      | Domain(s) with predicted electron carrier activity, heme binding, iron ion binding, monooxygenase activity, oxidoreductase activity, acting on paired donors, with incorporation or reduction of molecular oxygen activity                 |              |                |
| AO090001000025 | 17 | 131  |                                                                                                                                                                                                                                            | n/a          | AO090001000025 |
| AO090001000024 | 18 | 202  | Domain(s) with predicted oxidoreductase activity and role in metabolic process                                                                                                                                                             | n/a          | AO090001000024 |
|                |    |      | Domain(s) with predicted DNA binding, sequence-specific DNA binding RNA polymerase II transcription factor activity, zinc ion binding activity and role in regulation of transcription, DNA-dependent, transcription, DNA-dependent        |              |                |
| AO090001000753 | 19 | 1000 |                                                                                                                                                                                                                                            | n/a          | AO090001000753 |
|                |    |      | Domain(s) with predicted ATP binding, ATPase activity, coupled to transmembrane movement of substances activity, role in transmembrane transport and integral to membrane localization                                                     |              |                |
| AO090001000021 | 20 | 468  |                                                                                                                                                                                                                                            | n/a          | AO090001000021 |

## AO090001000262 cluster

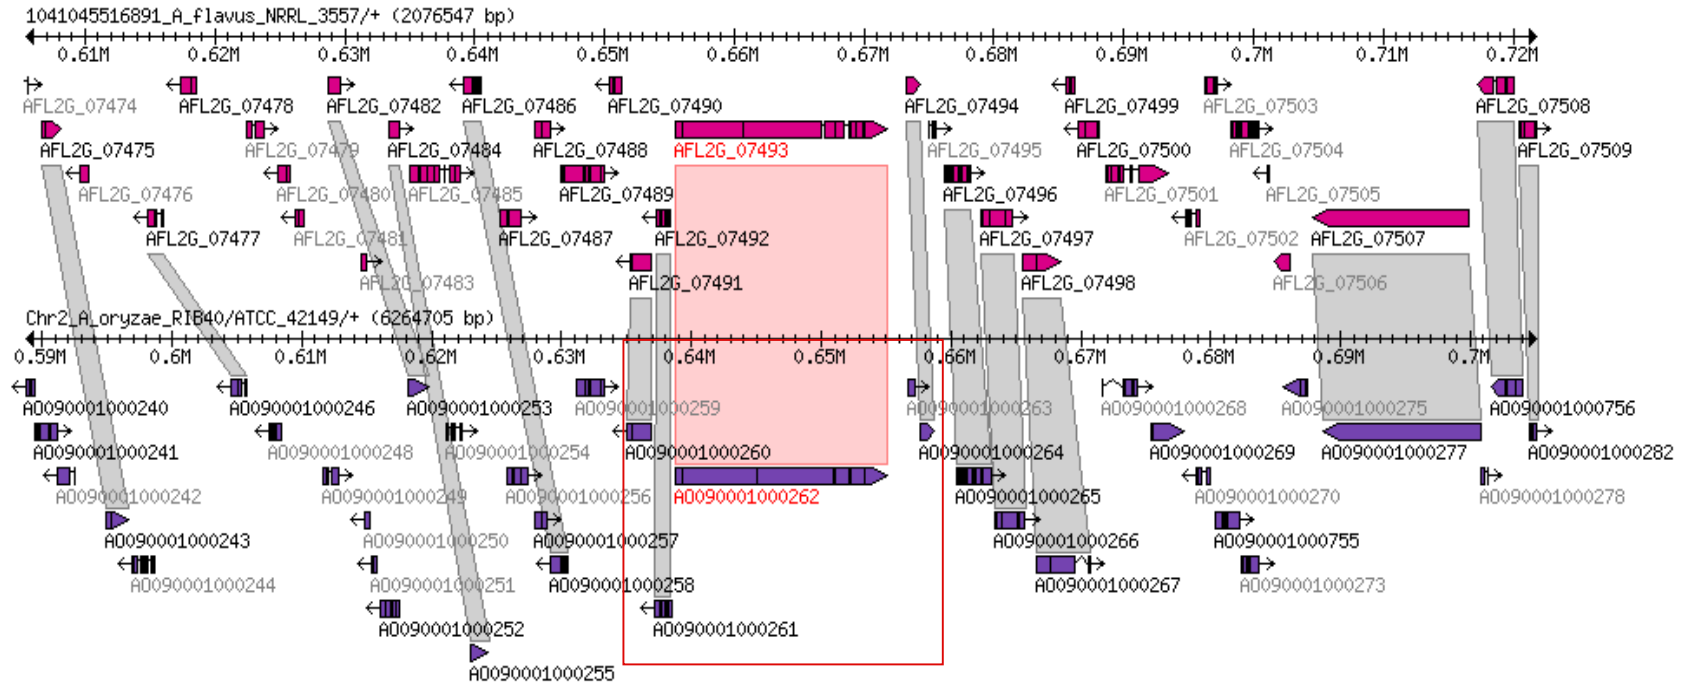

**AO090001000262 cluster**

| Gene id (SMURF) | Gene positions | Gene distance | Gene Name | Annotated_gene_function                                                                                                                                                                                                                                                     | antiSMASH ID | AspGD ID               |
|-----------------|----------------|---------------|-----------|-----------------------------------------------------------------------------------------------------------------------------------------------------------------------------------------------------------------------------------------------------------------------------|--------------|------------------------|
| n/a             |                |               |           | Ortholog of A. niger CBS 513.88 : An16g04050, A. oryzae RIB40 : AO090011000252, A. brasiliensis : Aspbr1_0036278 and A. flavus NRRL 3357 : AFL2T_07482                                                                                                                      | prot_ID_1241 | AO090001000253         |
| n/a             |                |               |           | Protein of unknown function                                                                                                                                                                                                                                                 | prot_ID_395  | AO090001000254         |
| n/a             |                |               |           | Domain(s) with predicted nucleotide binding, oxidoreductase activity, transferase activity, transferring acyl groups other than amino-acyl groups, zinc ion binding activity and role in oxidation-reduction process                                                        | prot_ID_1520 | AO090001000255         |
| n/a             |                |               |           | Domain(s) with predicted DNA binding, zinc ion binding activity, role in transcription, DNA-dependent and nucleus localization                                                                                                                                              | prot_ID_524  | AO090001000256         |
| n/a             |                |               |           | Domain(s) with predicted nucleotide binding, oxidoreductase activity and role in oxidation-reduction process                                                                                                                                                                | prot_ID_1773 | AO090001000257         |
| n/a             |                |               |           | Domain(s) with predicted catalytic activity and role in cellular amino acid catabolic process                                                                                                                                                                               | prot_ID_934  | AO090001000258         |
| n/a             |                |               |           | Domain(s) with predicted beta-galactosidase activity, cation binding activity and role in carbohydrate metabolic process                                                                                                                                                    | prot_ID_449  | AO090001000259         |
| n/a             |                |               | CYP5099A1 | <b>Cytochrome P450 monooxygenase</b><br>Domain(s) with predicted oxidoreductase activity, acting on paired donors, with incorporation or reduction of molecular oxygen, 2-oxoglutarate as one donor, and incorporation of one atom each of oxygen into both donors activity | prot_ID_1065 | AO090001000260 ECS     |
| n/a             |                |               |           | <b>Non-ribosomal peptide synthetase</b>                                                                                                                                                                                                                                     | prot_ID_1622 | AO090001000261         |
| n/a             |                |               |           | <b>Protein of unknown function</b>                                                                                                                                                                                                                                          | prot_ID_565  | AO090001000262         |
| n/a             |                |               |           | <b>Domain(s) with predicted nucleotide binding, oxidoreductase activity, zinc ion binding activity and role in oxidation-reduction process</b>                                                                                                                              | prot_ID_397  | AO090001000263         |
| n/a             |                |               |           | Domain(s) with predicted role in transmembrane transport and integral to membrane localization                                                                                                                                                                              | prot_ID_1195 | AO090001000264 FA, ECS |
| n/a             |                |               |           | Glycoside hydrolase family 3                                                                                                                                                                                                                                                | prot_ID_145  | AO090001000265         |
| n/a             |                |               |           | Protein of unknown function; predicted secretion signal peptide; positively regulated by XlnR; 2 putative XlnR binding sites in the promoter                                                                                                                                | prot_ID_1165 | AO090001000266         |
| n/a             |                |               |           | Domain(s) with predicted role in isoprenoid biosynthetic process                                                                                                                                                                                                            | prot_ID_537  | AO090001000267         |
| n/a             |                |               |           |                                                                                                                                                                                                                                                                             | prot_ID_1915 | AO090001000268         |

## AO090001000277 cluster

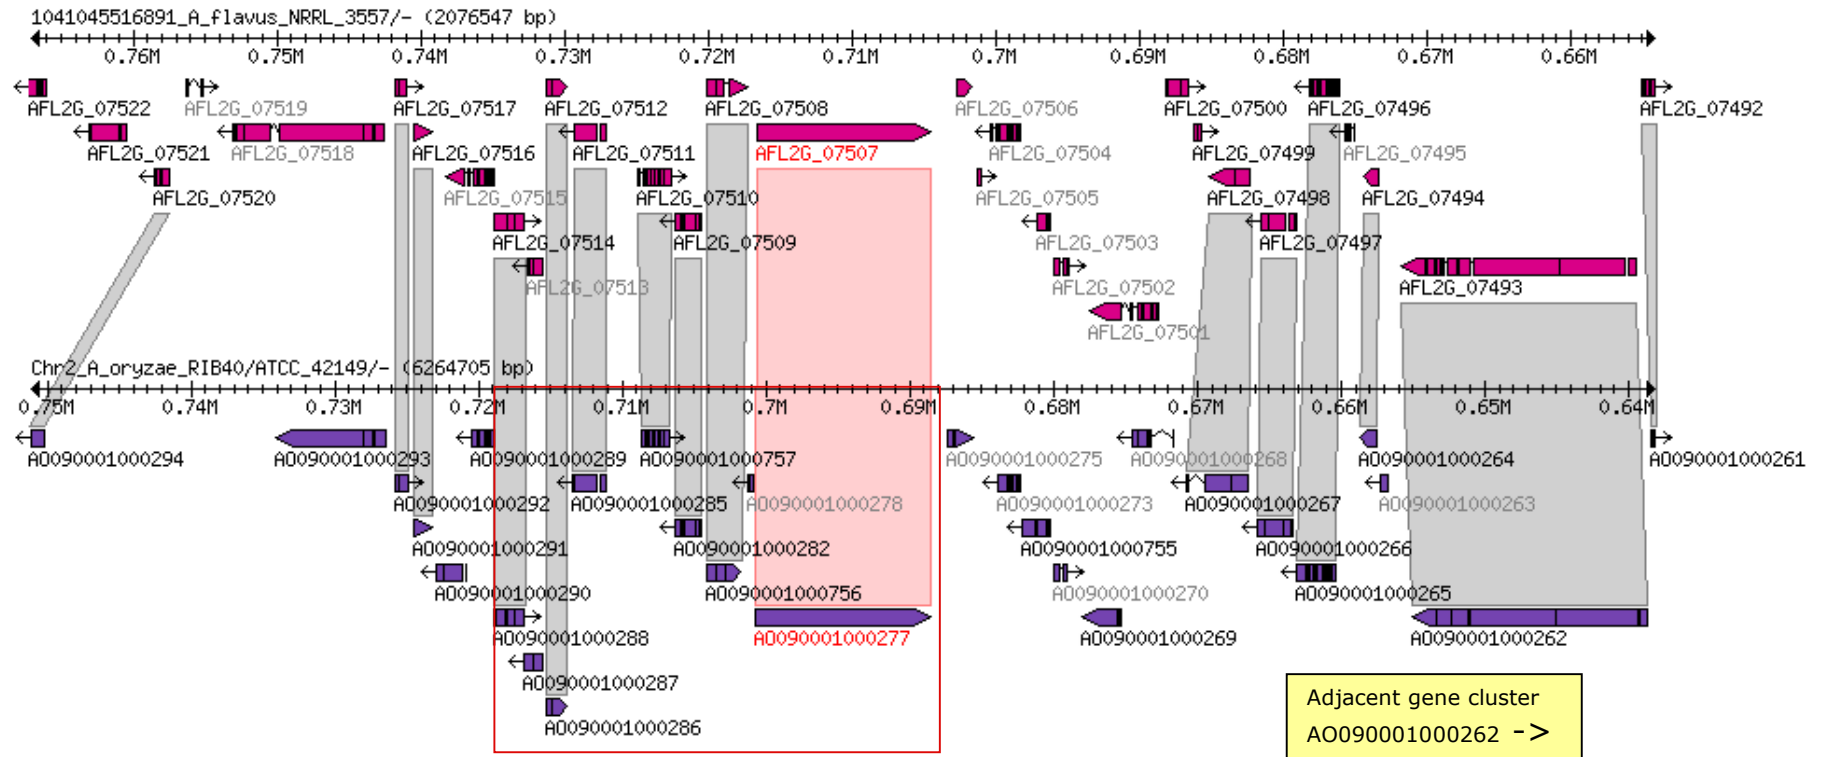

**AO090001000277 cluster**

| Gene id (SMURF)       | Gene positions | Gene distance | Gene Name | Annotated_gene_function                                                                                                                                                                                                             | antiSMASH ID | AspGD ID       |     |
|-----------------------|----------------|---------------|-----------|-------------------------------------------------------------------------------------------------------------------------------------------------------------------------------------------------------------------------------------|--------------|----------------|-----|
| AO090001000293        | -13            | 768           |           | Polyketide synthase                                                                                                                                                                                                                 | n/a          | AO090001000293 |     |
| AO090001000292        | -12            | 515           |           | Protein of unknown function; expression increased in MAT1-1 strain compared to MAT1-2 strain                                                                                                                                        | n/a          | AO090001000292 |     |
| AO090001000291        | -11            | 971           |           | Ortholog of A. nidulans FGSC A4 : AN2637, A. fumigatus Af293 : Afu2g13650, A. oryzae RIB40 : AO090005001139, AO090026000243 and A. niger ATCC 1015 : 42301-mRNA, 51721-mRNA                                                         | n/a          | AO090001000291 |     |
| AO090001000290        | -10            | 527           |           | Domain(s) with predicted oxidoreductase activity and role in metabolic process                                                                                                                                                      |              | AO090001000290 | ECS |
| AO090001000289        | -9             | 77            |           | Domain(s) with predicted O-methyltransferase activity                                                                                                                                                                               | prot_ID_606  | AO090001000289 |     |
| AO090001000288        | -8             | 212           |           | Cytochrome P450 monooxygenase                                                                                                                                                                                                       | prot_ID_1451 | AO090001000288 |     |
| AO090001000287        | -7             | 360           |           | Domain(s) with predicted nucleotide binding, oxidoreductase activity, transferase activity, transferring acyl groups other than amino-acyl groups, zinc ion binding activity and role in oxidation-reduction process                | prot_ID_1305 | AO090001000287 |     |
| AO090001000286        | -6             | 716           |           | Domain(s) with predicted nucleotide binding, oxidoreductase activity and role in metabolic process                                                                                                                                  | prot_ID_4    | AO090001000286 |     |
| AO090001000285        | -5             | 2506          |           | Domain(s) with predicted DNA binding, zinc ion binding activity, role in transcription, DNA-dependent and nucleus localization                                                                                                      | prot_ID_1025 | AO090001000285 |     |
| AO090001000757        | -4             | 618           |           | Cytochrome P450 monooxygenase                                                                                                                                                                                                       | prot_ID_1944 | AO090001000757 |     |
| AO090001000282        | -3             | 634           |           | Domain(s) with predicted role in transmembrane transport and integral to membrane localization                                                                                                                                      | prot_ID_686  | AO090001000282 |     |
| AO090001000756        | -2             | 330           |           | Domain(s) with predicted DNA binding, sequence-specific DNA binding RNA polymerase II transcription factor activity, zinc ion binding activity and role in regulation of transcription, DNA-dependent, transcription, DNA-dependent | prot_ID_1965 | AO090001000756 |     |
| AO090001000278        | -1             | 285           |           | Protein of unknown function                                                                                                                                                                                                         | prot_ID_1643 | AO090001000278 |     |
| <b>AO090001000277</b> | 0              | 0             |           | Polyketide synthase                                                                                                                                                                                                                 | prot_ID_264  | AO090001000277 | ECS |
| AO090001000275        | 1              | 1307          |           | Domain(s) with predicted DNA binding, zinc ion binding activity, role in transcription, DNA-dependent and nucleus localization                                                                                                      | prot_ID_598  | AO090001000275 |     |
| AO090001000273        | 2              | 1823          |           | Ortholog(s) have role in protein targeting to membrane and cytoplasm localization                                                                                                                                                   | prot_ID_1134 | AO090001000273 |     |
| AO090001000755        | 3              | 480           |           | Domain(s) with predicted sequence-specific DNA binding RNA polymerase II transcription factor activity, zinc ion binding activity, role in regulation of transcription, DNA-dependent and nucleus localization                      | prot_ID_1954 | AO090001000755 |     |
| AO090001000270        | 4              | 429           |           | Domain(s) with predicted catalytic activity and role in metabolic process                                                                                                                                                           | prot_ID_47   | AO090001000270 |     |

|                |    |      |                                                                                                                                                                                                                                     |              |                |
|----------------|----|------|-------------------------------------------------------------------------------------------------------------------------------------------------------------------------------------------------------------------------------------|--------------|----------------|
| AO090001000269 | 5  | 1099 | Ortholog of A. nidulans FGSC A4 : AN5315, A. niger CBS 513.88 : An01g01450, A. brasiliensis : Aspbr1_0053207, A. niger ATCC 1015 : 36402-mRNA and N. fischeri NRRL 181 : NFIA_044920                                                | prot_ID_1352 | AO090001000269 |
| AO090001000268 | 6  | 890  | Domain(s) with predicted role in isoprenoid biosynthetic process                                                                                                                                                                    | prot_ID_1915 | AO090001000268 |
| AO090001000267 | 7  | 932  | Protein of unknown function; predicted secretion signal peptide; positively regulated by XlnR; 2 putative XlnR binding sites in the promoter                                                                                        | prot_ID_537  | AO090001000267 |
| AO090001000266 | 8  | 693  | Glycoside hydrolase family 3                                                                                                                                                                                                        | n/a          | AO090001000266 |
| AO090001000265 | 9  | 854  | Domain(s) with predicted role in transmembrane transport and integral to membrane localization                                                                                                                                      | n/a          | AO090001000265 |
| AO090001000264 | 10 | 1753 | Domain(s) with predicted nucleotide binding, oxidoreductase activity, zinc ion binding activity and role in oxidation-reduction process                                                                                             | n/a          | AO090001000264 |
| AO090001000263 | 11 | 412  |                                                                                                                                                                                                                                     | n/a          | AO090001000263 |
| AO090001000262 | 12 | 1596 | Non-ribosomal peptide synthetase                                                                                                                                                                                                    | n/a          | AO090001000262 |
| AO090001000261 | 13 | 351  | Domain(s) with predicted oxidoreductase activity, acting on paired donors, with incorporation or reduction of molecular oxygen, 2-oxoglutarate as one donor, and incorporation of one atom each of oxygen into both donors activity | n/a          | AO090001000261 |
| AO090001000260 | 14 | 349  | Cytochrome P450 monooxygenase                                                                                                                                                                                                       | n/a          | AO090001000260 |
| AO090001000259 | 15 | 2074 | Domain(s) with predicted beta-galactosidase activity, cation binding activity and role in carbohydrate metabolic process                                                                                                            | n/a          | AO090001000259 |
| AO090001000258 | 16 | 605  | Domain(s) with predicted catalytic activity and role in cellular amino acid catabolic process                                                                                                                                       | n/a          | AO090001000258 |
| AO090001000257 | 17 | 307  | Domain(s) with predicted nucleotide binding, oxidoreductase activity and role in oxidation-reduction process                                                                                                                        | n/a          | AO090001000257 |
| AO090001000256 | 18 | 634  | Domain(s) with predicted DNA binding, zinc ion binding activity, role in transcription, DNA-dependent and nucleus localization                                                                                                      | n/a          | AO090001000256 |

## AO90001000402 cluster

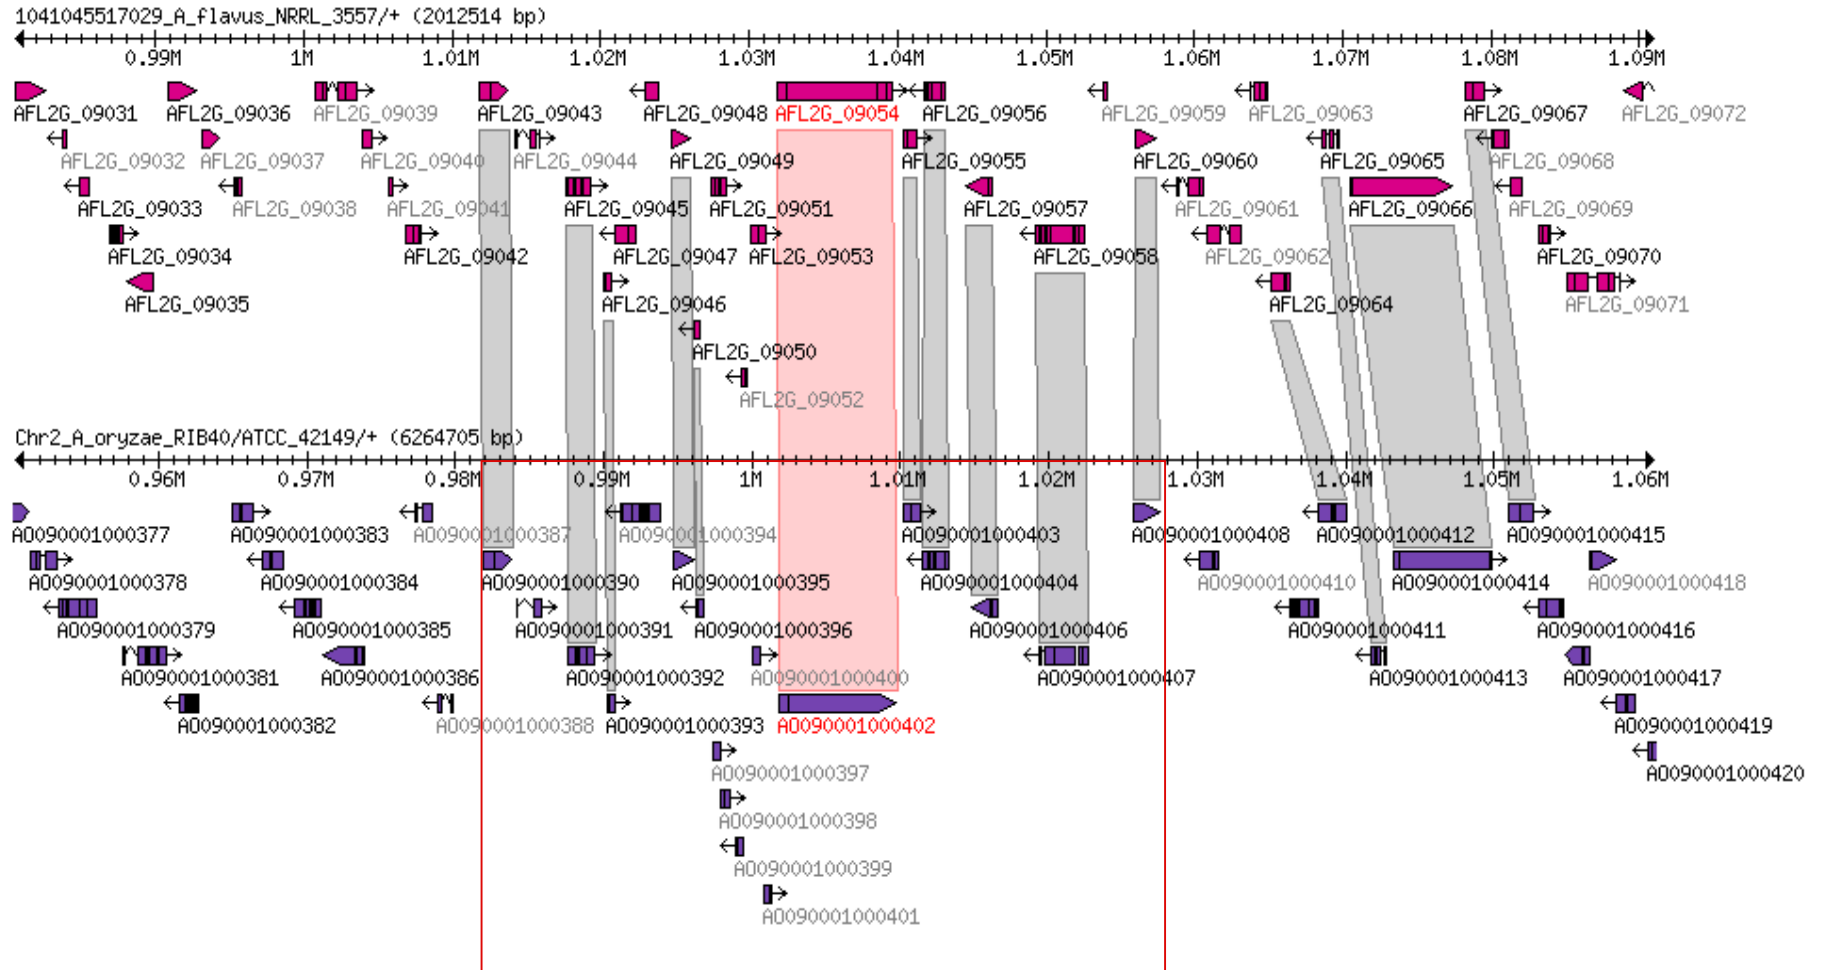

**AO090001000402 cluster**

| Gene id (SMURF)       | Gene positions | Gene distance | Gene Name | Annotated_gene_function                                                                                                                                                                                                             | antiSMASH ID | AspGD ID       |     |
|-----------------------|----------------|---------------|-----------|-------------------------------------------------------------------------------------------------------------------------------------------------------------------------------------------------------------------------------------|--------------|----------------|-----|
| n/a                   |                |               |           | Ortholog of <i>A. flavus</i> NRRL 3357 : AFL2T_09060, AFL2T_09737, <i>A. versicolor</i> : Aspve1_0080922 and <i>A. terreus</i> NIH2624 : ATET_05637                                                                                 | prot_ID_1162 | AO090001000408 | ECS |
| n/a                   |                |               |           | Domain(s) with predicted ADP binding, ATP binding activity and role in apoptotic process, defense response                                                                                                                          | prot_ID_1827 | AO090001000407 |     |
| n/a                   |                |               |           | Ortholog of <i>A. nidulans</i> FGSC A4 : AN7214, <i>A. oryzae</i> RIB40 : AO090120000014, AO090103000238, <i>A. niger</i> ATCC 1015 : 206373-mRNA and <i>A. versicolor</i> : Aspve1_0038859                                         | prot_ID_767  | AO090001000406 |     |
| AO090001000404        | -2             | 370           |           | Domain(s) with predicted role in transmembrane transport and integral to membrane localization                                                                                                                                      | prot_ID_487  | AO090001000404 |     |
| AO090001000403        | -1             | 1102          |           | Ortholog(s) have cytoplasm, nucleus localization                                                                                                                                                                                    | prot_ID_1401 | AO090001000403 |     |
| <b>AO090001000402</b> | 0              | 0             |           | Polyketide synthase                                                                                                                                                                                                                 | prot_ID_341  | AO090001000402 |     |
| AO090001000401        | 1              | 578           |           | Protein of unnown function                                                                                                                                                                                                          | prot_ID_947  | AO090001000401 |     |
| AO090001000400        | 2              | 174           |           | Domain(s) with predicted nucleotide binding activity                                                                                                                                                                                | prot_ID_1701 | AO090001000400 |     |
| AO090001000399        | 3              | 694           |           | Domain(s) with predicted nucleotide binding activity                                                                                                                                                                                | prot_ID_197  | AO090001000399 |     |
|                       |                |               |           | Domain(s) with predicted oxidoreductase activity, acting on paired donors, with incorporation or reduction of molecular oxygen, 2-oxoglutarate as one donor, and incorporation of one atom each of oxygen into both donors activity |              |                |     |
| AO090001000398        | 4              | 342           |           |                                                                                                                                                                                                                                     | prot_ID_1318 | AO090001000398 |     |
| AO090001000397        | 5              | 65            |           |                                                                                                                                                                                                                                     | prot_ID_518  | AO090001000397 |     |
| AO090001000396        | 6              | 714           |           | Ortholog of <i>A. nidulans</i> FGSC A4 : AN0527 and <i>A. flavus</i> NRRL 3357 : AFL2T_09050                                                                                                                                        | prot_ID_1579 | AO090001000396 |     |
| AO090001000395        | 7              | 213           |           | Domain(s) with predicted role in transmembrane transport and integral to membrane localization                                                                                                                                      | prot_ID_631  | AO090001000395 |     |
| AO090001000394        | 8              | 877           |           | Domain(s) with predicted monooxygenase activity and role in oxidation-reduction process                                                                                                                                             | prot_ID_1736 | AO090001000394 |     |
| AO090001000393        | 9              | 414           |           | Ortholog of <i>A. nidulans</i> FGSC A4 : AN8308 and <i>A. flavus</i> NRRL 3357 : AFL2T_09046                                                                                                                                        | prot_ID_950  | AO090001000393 |     |
|                       |                |               |           | Domain(s) with predicted DNA binding, sequence-specific DNA binding RNA polymerase II transcription factor activity, zinc ion binding activity and role in regulation of transcription, DNA-dependent, transcription, DNA-dependent |              |                |     |
| AO090001000392        | 10             | 766           |           |                                                                                                                                                                                                                                     | prot_ID_32   | AO090001000392 |     |
| AO090001000391        | 11             | 1847          |           | Ortholog of <i>A. nidulans</i> FGSC A4 : AN7850, <i>A. fumigatus</i> Af293 : Afu4g14030, <i>N. fischeri</i> NRRL 181 : NFIA_102290, <i>A. terreus</i> NIH2624 : ATET_02187 and <i>A. fumigatus</i> A1163 : AFUB_070950              | prot_ID_1872 | AO090001000391 |     |



|                |    |     |                                                                                             |             |                |     |
|----------------|----|-----|---------------------------------------------------------------------------------------------|-------------|----------------|-----|
| AO090001000390 | 12 | 203 | Putative carnitine transport protein; predominantly expressed in the basal region of hyphae | prot_ID_980 | AO090001000390 | ECS |
|----------------|----|-----|---------------------------------------------------------------------------------------------|-------------|----------------|-----|

## AO090001000293 cluster

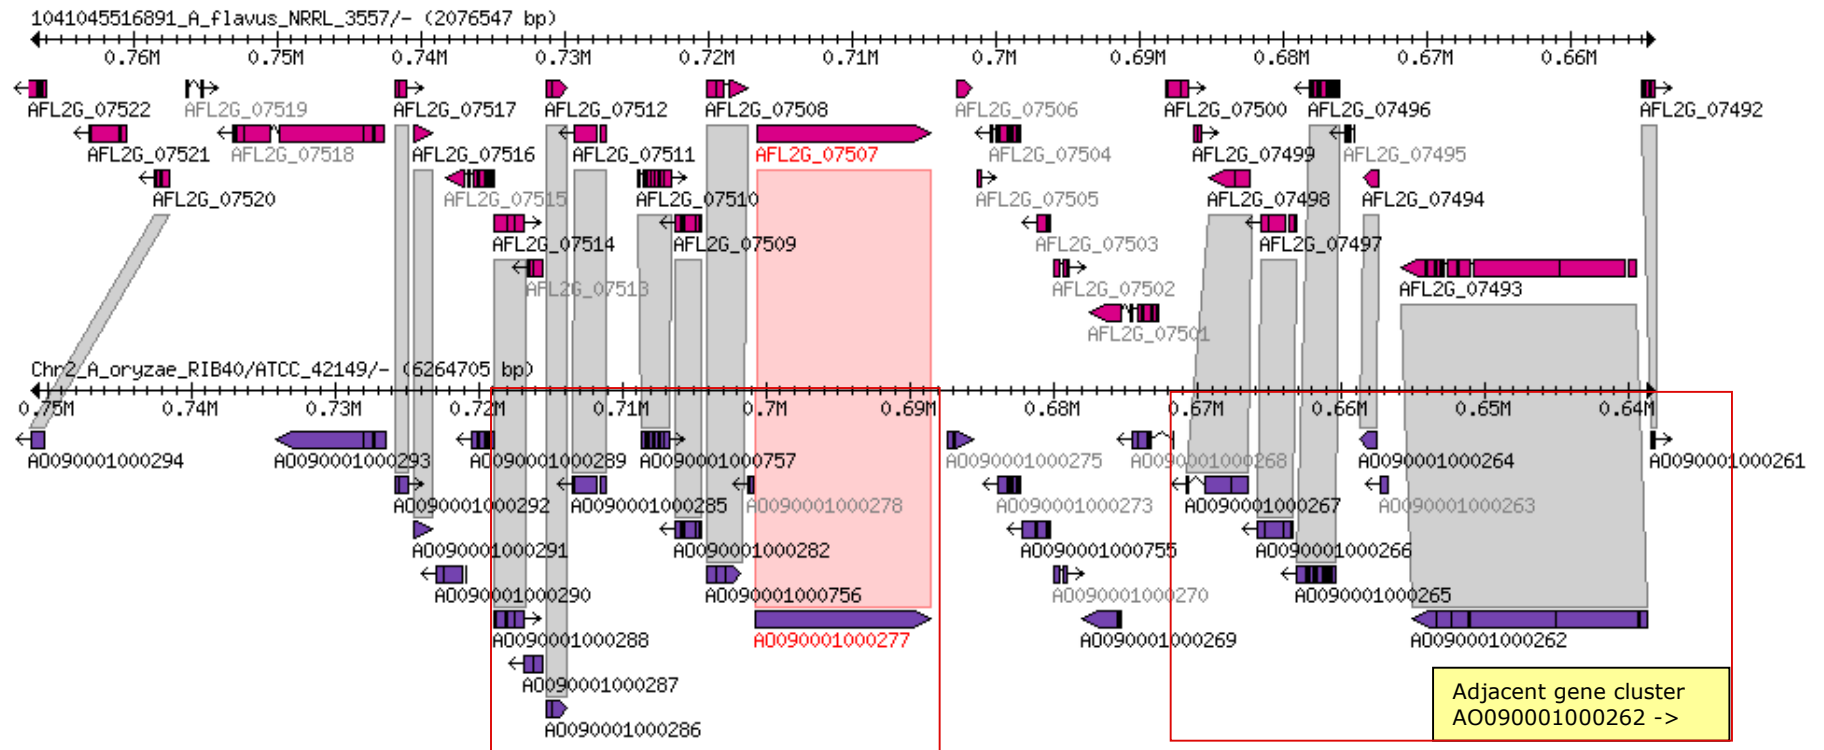

**AO090001000293 cluster**

| Gene id (SMURF) | Gene positions | Gene distance | Gene Name | Annotated_gene_function                                                                                                                                                                                              | antiSMASH ID | AspGD ID       |     |
|-----------------|----------------|---------------|-----------|----------------------------------------------------------------------------------------------------------------------------------------------------------------------------------------------------------------------|--------------|----------------|-----|
| n/a             |                |               |           | Putative polyketide synthase (PKS) - nonribosomal peptide synthase (NRPS) hybrid                                                                                                                                     | n/a          | AO090001000277 | ECS |
| n/a             |                |               |           |                                                                                                                                                                                                                      | n/a          | AO090001000756 |     |
| n/a             |                |               |           | Domain(s) with predicted role in transmembrane transport and integral to membrane localization                                                                                                                       | n/a          | AO090001000282 |     |
| n/a             |                |               | CYP5286A1 | Cytochrome P450 monooxygenase                                                                                                                                                                                        | prot_ID_1944 | AO090001000757 |     |
| n/a             |                |               |           | Domain(s) with predicted DNA binding, zinc ion binding activity, role in transcription, DNA-dependent and nucleus localization                                                                                       | prot_ID_1025 | AO090001000285 |     |
| n/a             |                |               |           | Domain(s) with predicted nucleotide binding, oxidoreductase activity and role in metabolic process                                                                                                                   | prot_ID_4    | AO090001000286 |     |
| n/a             |                |               |           | Domain(s) with predicted nucleotide binding, oxidoreductase activity, transferase activity, transferring acyl groups other than amino-acyl groups, zinc ion binding activity and role in oxidation-reduction process | prot_ID_1305 | AO090001000287 |     |
| n/a             |                |               | CYP655B1  | Cytochrome P450 monooxygenase                                                                                                                                                                                        | prot_ID_1451 | AO090001000288 | ECS |
| n/a             |                |               |           | Domain(s) with predicted O-methyltransferase activity                                                                                                                                                                | prot_ID_606  | AO090001000289 |     |
| n/a             |                |               |           | Domain(s) with predicted oxidoreductase activity and role in metabolic process                                                                                                                                       | prot_ID_1243 | AO090001000290 |     |
| n/a             |                |               |           | Ortholog of A. nidulans FGSC A4 : AN2637, A. fumigatus Af293 : Afu2g13650, A. oryzae RIB40 : AO090005001139, AO090026000243 and A. niger ATCC 1015 : 42301-mRNA, 51721-mRNA                                          | prot_ID_396  | AO090001000291 |     |
| n/a             |                |               |           | Protein of unknown function; expression increased in MAT1-1 strain compared to MAT1-2 strain                                                                                                                         | prot_ID_1512 | AO090001000292 |     |
| n/a             |                |               |           | Polyketide synthase                                                                                                                                                                                                  | prot_ID_674  | AO090001000293 |     |
| n/a             |                |               |           | Domain(s) with predicted extracellular region localization                                                                                                                                                           | prot_ID_1681 | AO090001000294 |     |
| n/a             |                |               |           | Ortholog(s) have role in acetate catabolic process, alcohol metabolic process, carnitine metabolic process and mitochondrion localization                                                                            | prot_ID_939  | AO090001000295 |     |

## AO90001000506 cluster

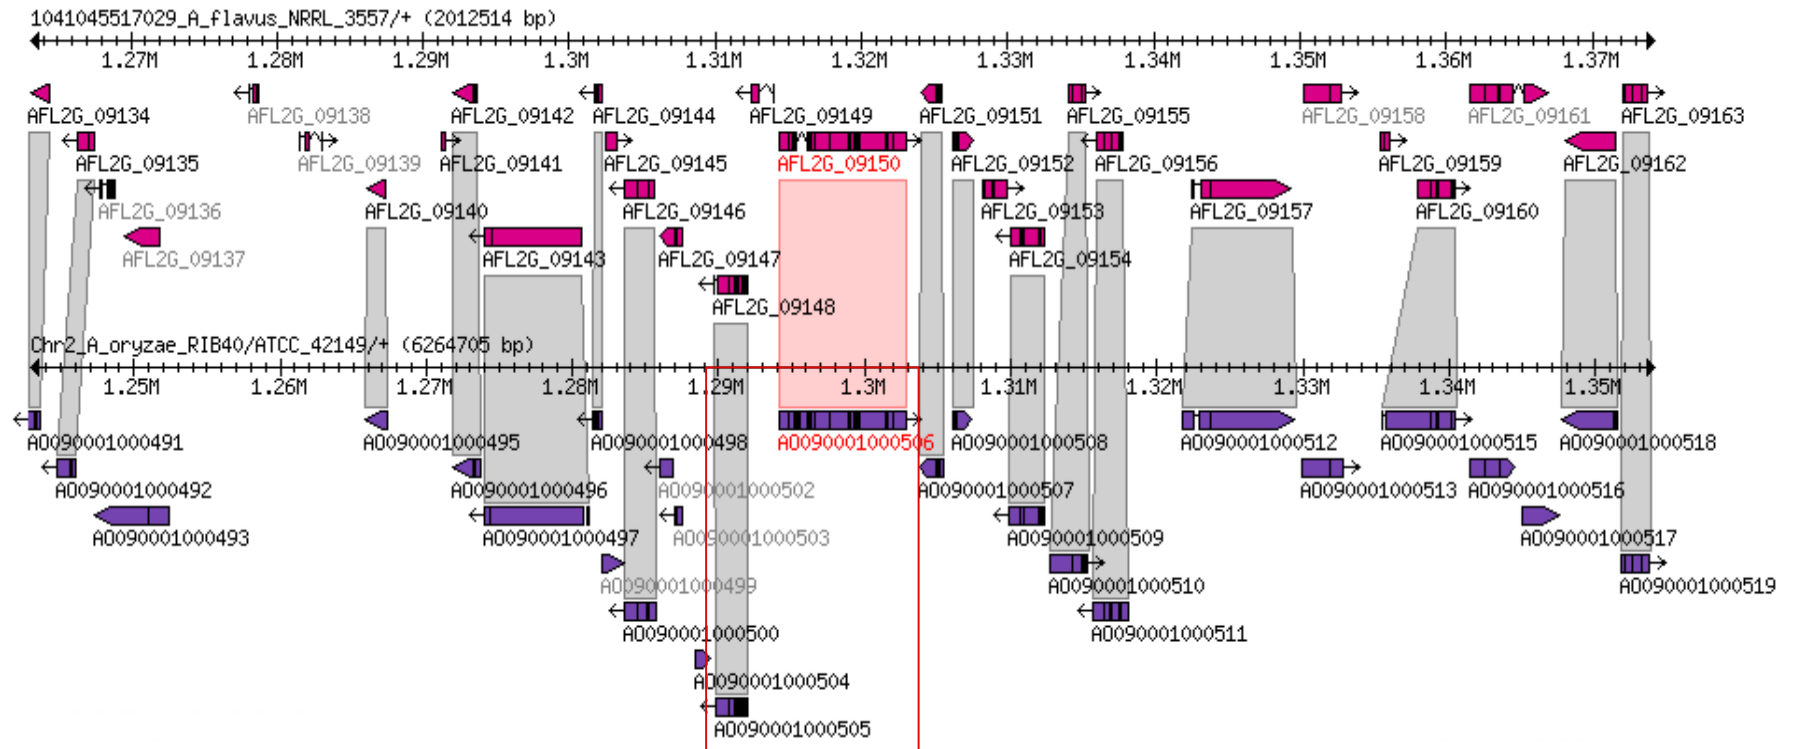

**AO090001000506 cluster**

| Gene id (SMURF)       | Gene positions | Gene distance | Gene Name | Annotated_gene_function                                                                                                                                                                    | antiSMASH ID | AspGD ID           |
|-----------------------|----------------|---------------|-----------|--------------------------------------------------------------------------------------------------------------------------------------------------------------------------------------------|--------------|--------------------|
| n/a                   |                |               | cyaA      | Adenylate cyclase                                                                                                                                                                          | prot_ID_296  | AO090001000512     |
| n/a                   |                |               |           | Domain(s) with predicted hydrolase activity, hydrolyzing O-glycosyl compounds activity, role in carbohydrate metabolic process, cellular cell wall organization and cell wall localization | prot_ID_1366 | AO090001000511     |
| n/a                   |                |               |           | Domain(s) with predicted transporter activity, role in transmembrane transport, water transport and integral to membrane localization                                                      | prot_ID_27   | AO090001000510     |
| n/a                   |                |               |           | Ortholog(s) have glycerol kinase activity and mitochondrion localization                                                                                                                   | prot_ID_87   | AO090001000509     |
| n/a                   |                |               |           | Domain(s) with predicted GTP binding, GTPase activity                                                                                                                                      | prot_ID_1353 | AO090001000508     |
| n/a                   |                |               |           | Domain(s) with predicted GTP binding, nucleoside-triphosphatase activity                                                                                                                   | prot_ID_330  | AO090001000507     |
| <b>AO090001000506</b> | 0              | 0             |           | <b>Polyketide synthase</b>                                                                                                                                                                 | prot_ID_1317 | AO090001000506 FA  |
| AO090001000505        | 1              | 2254          |           | <b>Domain(s) with predicted role in transmembrane transport and integral to membrane localization</b>                                                                                      | prot_ID_444  | AO090001000505 ECS |
| n/a                   |                |               |           | Domain(s) with predicted phosphoglycolate phosphatase activity and role in metabolic process                                                                                               | prot_ID_1034 | AO090001000504     |
| n/a                   |                |               |           | Protein of unknown function                                                                                                                                                                | prot_ID_180  | AO090001000503     |
| n/a                   |                |               |           | Protein of unknown function                                                                                                                                                                | prot_ID_1724 | AO090001000502     |
| n/a                   |                |               |           | Ortholog(s) have oxygen-dependent protoporphyrinogen oxidase activity, role in heme biosynthetic process and mitochondrial inner membrane localization                                     | prot_ID_1438 | AO090001000500     |
| n/a                   |                |               |           | Protein of unknown function                                                                                                                                                                | prot_ID_789  | AO090001000499     |
| n/a                   |                |               |           | Domain(s) with predicted ubiquinol-cytochrome-c reductase activity, role in mitochondrial electron transport, ubiquinol to cytochrome c and mitochondrial envelope localization            | prot_ID_266  | AO090001000498     |
| n/a                   |                |               |           | Ortholog(s) have ubiquitin-protein ligase activity                                                                                                                                         | prot_ID_701  | AO090001000497     |
| n/a                   |                |               |           | Domain(s) with predicted nucleus localization                                                                                                                                              | n/a          | AO090001000496     |
| n/a                   |                |               |           | Domain(s) with predicted catalytic activity, cation binding activity and role in carbohydrate metabolic process                                                                            | n/a          | AO090001000495     |

# AO090001000516 cluster

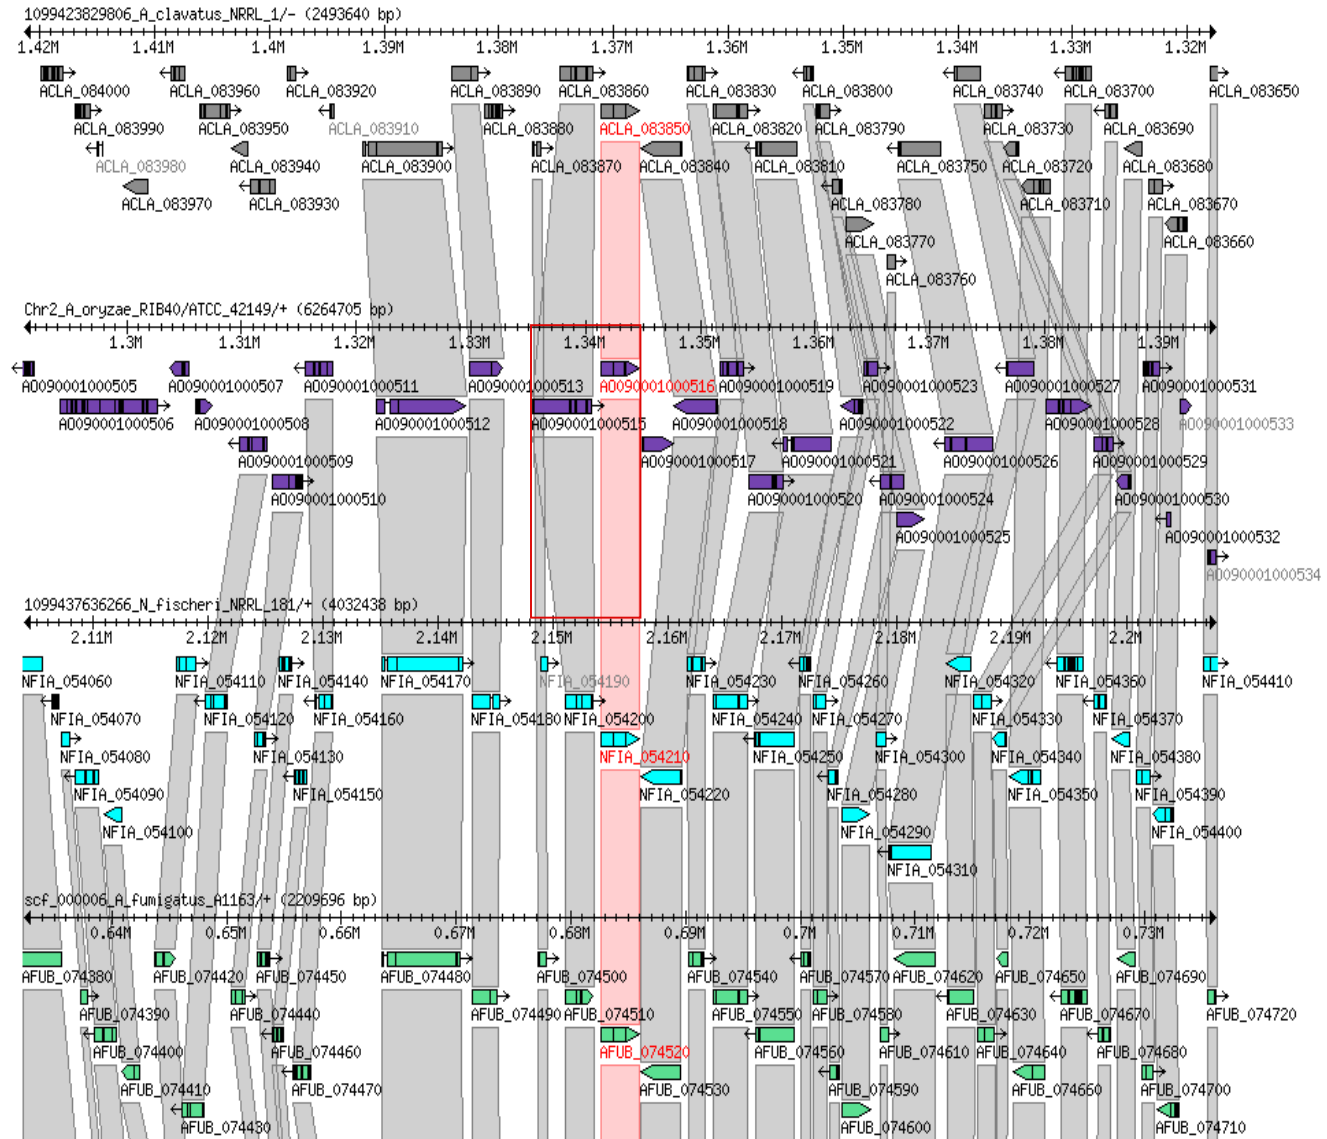

**AO090001000516 cluster**

| Gene id (SMURF)       | Gene positions | Gene distance | Gene Name | Annotated_gene_function                                                                                                                                                                                                                                                     | antiSMASH ID | AspGD ID           |
|-----------------------|----------------|---------------|-----------|-----------------------------------------------------------------------------------------------------------------------------------------------------------------------------------------------------------------------------------------------------------------------------|--------------|--------------------|
| n/a                   |                |               |           | golgi reassembly stacking protein GRASP65<br>Ortholog(s) have RNA methyltransferase activity, role in 7-methylguanosine cap hypermethylation, meiosis, nucleologenesis, regulation of telomere maintenance via telomerase and nucleolus localization                        | prot_ID_319  | AO090001000523     |
| n/a                   |                |               |           | Transcription initiation factor TFIID, subunit TAF1                                                                                                                                                                                                                         | prot_ID_1602 | AO090001000522     |
| n/a                   |                |               |           | Serine/threonine kinase                                                                                                                                                                                                                                                     | prot_ID_506  | AO090001000521     |
| n/a                   |                |               |           | Ortholog(s) have macrolide binding, peptidyl-prolyl cis-trans isomerase activity                                                                                                                                                                                            | prot_ID_1815 | AO090001000520     |
| n/a                   |                |               |           | Translesion DNA polymerase                                                                                                                                                                                                                                                  | prot_ID_307  | AO090001000519     |
| n/a                   |                |               |           | Ortholog of A. versicolor : Aspve1_0088708 and A. carbonarius ITEM 5010 : Acar5010_131530                                                                                                                                                                                   | prot_ID_1374 | AO090001000518     |
| n/a                   |                |               |           |                                                                                                                                                                                                                                                                             | prot_ID_31   | AO090001000517     |
| <b>AO090001000516</b> | 0              | 0             |           | <b>Non-ribosomal peptide synthetase Domain(s) with predicted DNA binding, sequence-specific DNA binding RNA polymerase II transcription factor activity, zinc ion binding activity and role in regulation of transcription, DNA-dependent, transcription, DNA-dependent</b> | prot_ID_1073 | AO090001000516 ECS |
| AO090001000515        | 1              | 1044          |           | Ortholog(s) have role in maintenance of rDNA, mitotic sister chromatid segregation and nuclear envelope localization                                                                                                                                                        | prot_ID_1908 | AO090001000515 ECS |
| n/a                   |                |               |           |                                                                                                                                                                                                                                                                             | prot_ID_1628 | AO090001000513     |
| n/a                   |                |               | cyaA      | Serine/threonine phosphatase 2C                                                                                                                                                                                                                                             | prot_ID_296  | AO090001000512     |

## AO090001000768 cluster

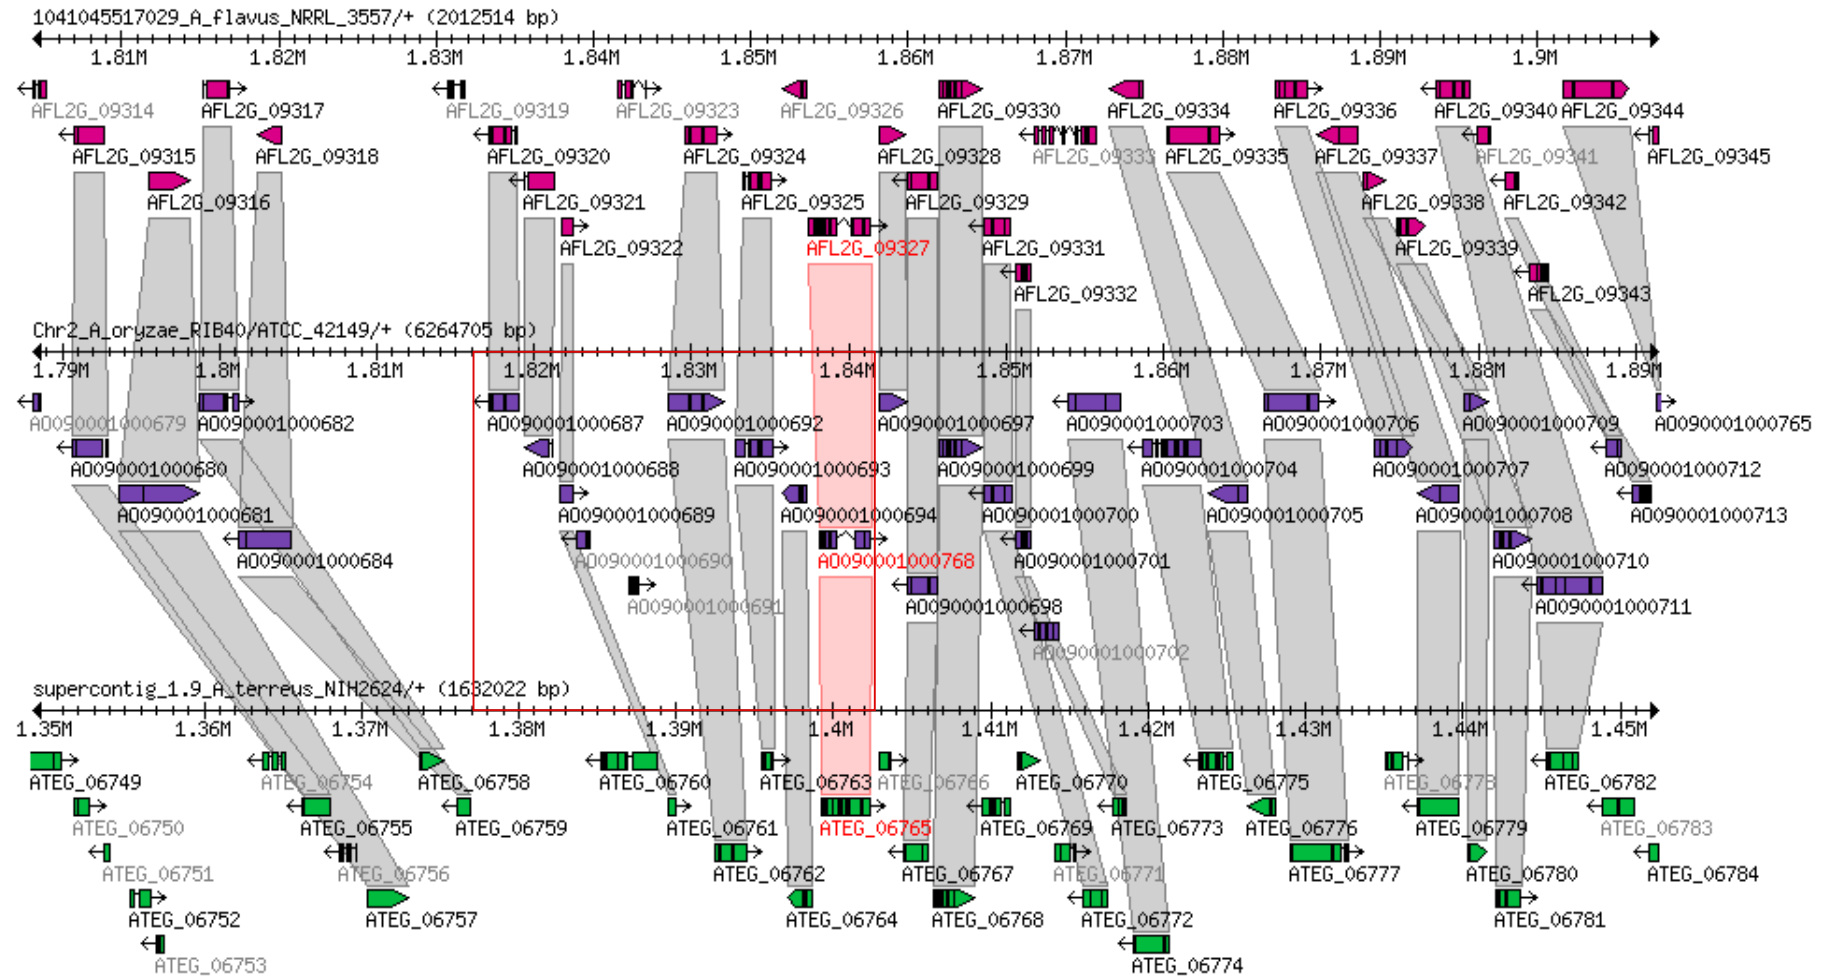



**AO090001000768 cluster**

| Gene id (SMURF)       | Gene positions | Gene distance | Gene Name | Annotated_gene_function                                                                                                                                                                                                                                                                                                                  | antiSMASH ID | AspGD ID           |
|-----------------------|----------------|---------------|-----------|------------------------------------------------------------------------------------------------------------------------------------------------------------------------------------------------------------------------------------------------------------------------------------------------------------------------------------------|--------------|--------------------|
| AO090001000704        | -8             | 2565          |           | Domain(s) with predicted transporter activity, role in transmembrane transport and integral to membrane localization<br>Ortholog(s) have RNA polymerase II regulatory region sequence-specific DNA binding activity, role in carbon utilization and cytoplasm, nucleus localization                                                      | n/a          | AO090001000704     |
| AO090001000703        | -7             | 1104          |           |                                                                                                                                                                                                                                                                                                                                          | n/a          | AO090001000703     |
| AO090001000702        | -6             | 276           |           | Domain(s) with predicted catalytic activity and role in metabolic process<br>Ortholog(s) have riboflavin kinase activity, role in FMN biosynthetic process and mitochondrial inner membrane localization                                                                                                                                 | n/a          | AO090001000702     |
| AO090001000701        | -5             | 467           |           |                                                                                                                                                                                                                                                                                                                                          | n/a          | AO090001000701     |
| AO090001000700        | -4             | 118           |           | Ortholog of A. nidulans FGSC A4 : AN7470, A. fumigatus Af293 : Afu2g05810, A. niger CBS 513.88 : An02g14540, A. niger ATCC 1015 : 123724-mRNA and A. versicolor : Aspve1_0135868                                                                                                                                                         | n/a          | AO090001000700     |
| AO090001000699        | -3             | 321           |           | Domain(s) with predicted hydrolase activity, acting on glycosyl bonds, phosphotransferase activity, alcohol group as acceptor activity<br>Ortholog(s) have dolichyl-diphosphooligosaccharide-protein glycotransferase activity, role in protein N-linked glycosylation via asparagine and oligosaccharyltransferase complex localization | n/a          | AO090001000699     |
| AO090001000698        | -2             | 412           |           | Ortholog(s) have mRNA guanylyltransferase activity, role in 7-methylguanosine mRNA capping, positive regulation of transcription from RNA polymerase II promoter and mRNA cap methyltransferase complex localization                                                                                                                     | n/a          | AO090001000698     |
| AO090001000697        | -1             | 679           |           |                                                                                                                                                                                                                                                                                                                                          | n/a          | AO090001000697     |
| <b>AO090001000768</b> | 0              | 0             |           | Domain(s) with predicted catalytic activity and role in biosynthetic process                                                                                                                                                                                                                                                             | n/a          | AO090001000768 ECS |
| AO090001000694        | 1              | 1000          |           | Domain(s) with predicted hydrolase activity, acting on carbon-nitrogen (but not peptide) bonds, in linear amidines, metal ion binding activity                                                                                                                                                                                           | n/a          | AO090001000694     |
| AO090001000693        | 2              | 1399          |           | Ortholog(s) have GTPase activity                                                                                                                                                                                                                                                                                                         | n/a          | AO090001000693     |
| AO090001000692        | 3              | 1840          |           | Domain(s) with predicted role in transmembrane transport and integral to membrane localization                                                                                                                                                                                                                                           | n/a          | AO090001000692     |
| n/a                   |                |               |           | Protein of unknown function                                                                                                                                                                                                                                                                                                              | n/a          | AO090001000691     |
| n/a                   |                |               |           | Domain(s) with predicted nucleotide binding, oxidoreductase activity, transferase activity, transferring acyl groups other than amino-acyl groups, zinc ion binding activity and role in oxidation-reduction process                                                                                                                     | n/a          | AO090001000690     |
| n/a                   |                |               |           | Ortholog of A. nidulans FGSC A4 : AN7484, A. fumigatus Af293 : Afu2g05720, A. niger CBS 513.88 : An02g14170, A. niger ATCC 1015 : 47182-mRNA and A. versicolor : Aspve1_0085916                                                                                                                                                          | n/a          | AO090001000689     |
| n/a                   |                |               |           | Ortholog of A. nidulans FGSC A4 : AN4092, AN7483, A. fumigatus Af293 : Afu2g05710, A. niger ATCC 1015 : 207477-mRNA and A. versicolor : Aspve1_0043503 (2)                                                                                                                                                                               | n/a          | AO090001000688     |

n/a

Ortholog of *A. fumigatus* Af293 : Afu2g05700, *N. fischeri* NRRL 181 : NFIA\_082420, *A. flavus* NRRL 3357 : AFL2T\_09320, *A. clavatus* NRRL 1 : ACLA\_068640 and *A. acidus* : Aspfo1\_0474562

n/a

AO090001000687 ECS

## A0090003000945 cluster

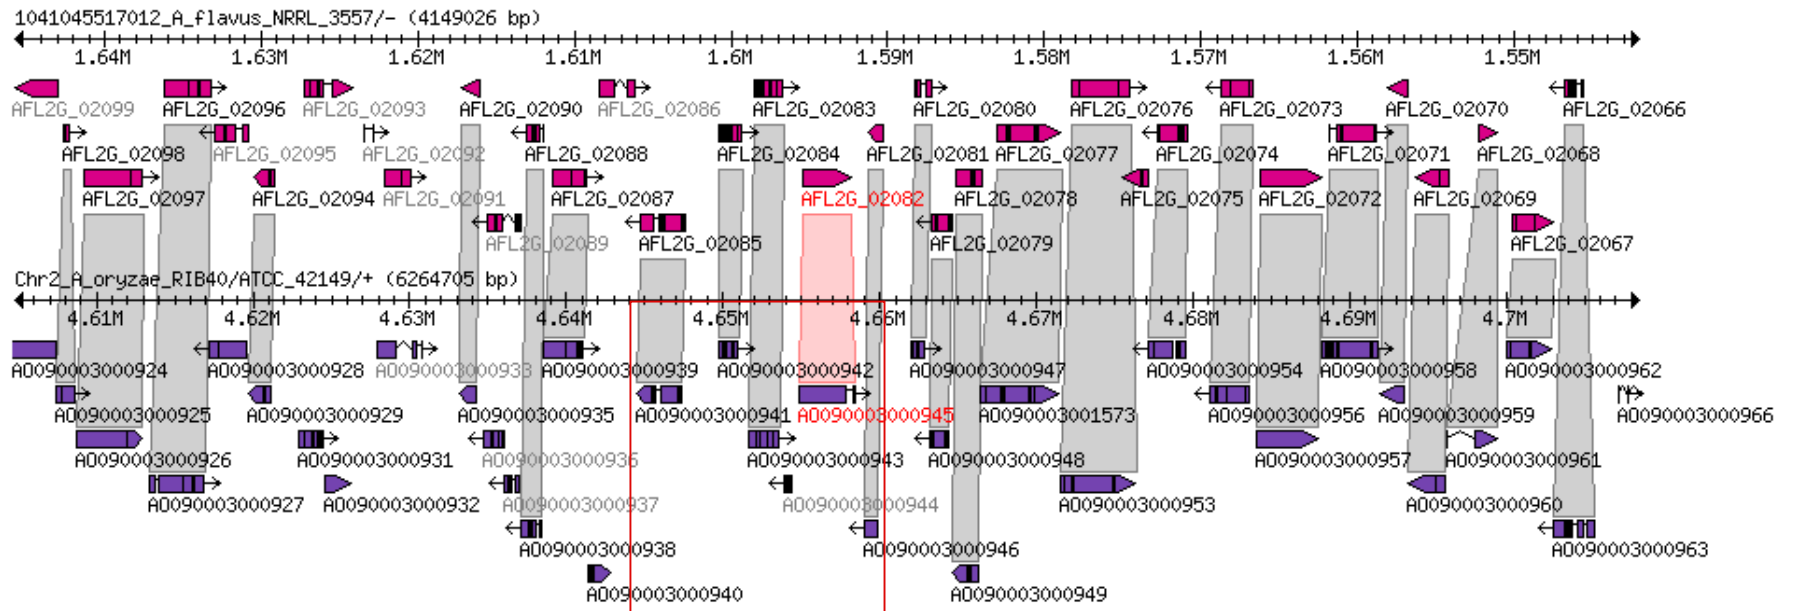

**AO090003000945 cluster**

| Gene id (SMURF)       | Gene positions | Gene distance | Gene Name | Annotated_gene_function                                                                                                                                                                                                                                                         | antiSMASH ID | AspGD ID           |
|-----------------------|----------------|---------------|-----------|---------------------------------------------------------------------------------------------------------------------------------------------------------------------------------------------------------------------------------------------------------------------------------|--------------|--------------------|
| AO090003000954        | -7             | 2184          |           | Cytochrome P450 monooxygenase<br>Ortholog(s) have GTP binding, GTPase activity, glutathione binding, ribosome binding, translation initiation factor activity, role in regulation of translational initiation and cytosolic small ribosomal subunit, mitochondrion localization | prot_ID_776  | AO090003000954     |
| AO090003000953        | -6             | 617           |           |                                                                                                                                                                                                                                                                                 | prot_ID_1882 | AO090003000953     |
| AO090003001573        | -5             | 1264          |           | Ortholog(s) have role in response to temperature stimulus                                                                                                                                                                                                                       | prot_ID_1952 | AO090003001573     |
| AO090003000949        | -4             | 334           |           | Ortholog(s) have Rab GTPase activator activity, role in vesicle-mediated transport and intracellular localization                                                                                                                                                               | prot_ID_1006 | AO090003000949     |
| AO090003000948        | -3             | 378           |           | Ortholog(s) have Rab GTPase binding activity and Golgi apparatus localization                                                                                                                                                                                                   | prot_ID_229  | AO090003000948     |
| AO090003000947        | -2             | 2147          |           | Ortholog(s) have role in protein ubiquitination, ribosome biogenesis and extracellular region, membrane, mitochondrion localization                                                                                                                                             | prot_ID_1220 | AO090003000947     |
| AO090003000946        | -1             | 700           |           | Short chain-type dehydrogenase                                                                                                                                                                                                                                                  | prot_ID_1537 | AO090003000946 ECS |
| <b>AO090003000945</b> | 0              | 0             |           | Non-ribosomal peptide synthetase                                                                                                                                                                                                                                                | prot_ID_706  | AO090003000945     |
| n/a                   |                |               |           | Protein of unknown function                                                                                                                                                                                                                                                     | prot_ID_1597 | AO090003000944     |
| n/a                   |                |               |           | Domain(s) with predicted CoA-transferase activity and role in ketone body catabolic process                                                                                                                                                                                     | prot_ID_895  | AO090003000943     |
| n/a                   |                |               |           | Ortholog of A. nidulans FGSC A4 : AN8945, A. fumigatus Af293 : Afu8g01930, A. oryzae RIB40 : AO090001000531, AO090010000650, A. niger ATCC 1015 : 204025-mRNA and A. versicolor : Aspve1_0057483                                                                                | prot_ID_1596 | AO090003000942     |
| n/a                   |                |               |           | Domain(s) with predicted DNA binding, zinc ion binding activity, role in transcription, DNA-dependent and nucleus localization                                                                                                                                                  | prot_ID_511  | AO090003000941 ECS |
| n/a                   |                |               |           | Domain(s) with predicted oxidoreductase activity and role in oxidation-reduction process                                                                                                                                                                                        | prot_ID_1816 | AO090003000940     |
| n/a                   |                |               |           | Ortholog(s) have role in Golgi to vacuole transport, actin filament-based process, retrograde transport, endosome to Golgi and GARP complex localization                                                                                                                        | prot_ID_1476 | AO090003000939     |
| n/a                   |                |               | eif-5A    | Translation initiation factor 5A; predominantly expressed in the hyphal tip region                                                                                                                                                                                              | prot_ID_1888 | AO090003000938     |
| n/a                   |                |               |           | Protein of unknown function                                                                                                                                                                                                                                                     | prot_ID_813  | AO090003000937     |
| n/a                   |                |               |           | Protein of unknown function                                                                                                                                                                                                                                                     | prot_ID_1689 | AO090003000936     |
| n/a                   |                |               |           | Ortholog of A. fumigatus Af293 : Afu1g04130, N. fischeri NRRL 181 : NFIA_020600 and A. flavus NRRL 3357 : AFL2T_02090                                                                                                                                                           | n/a          | AO090003000935     |

# AO90003001097 cluster

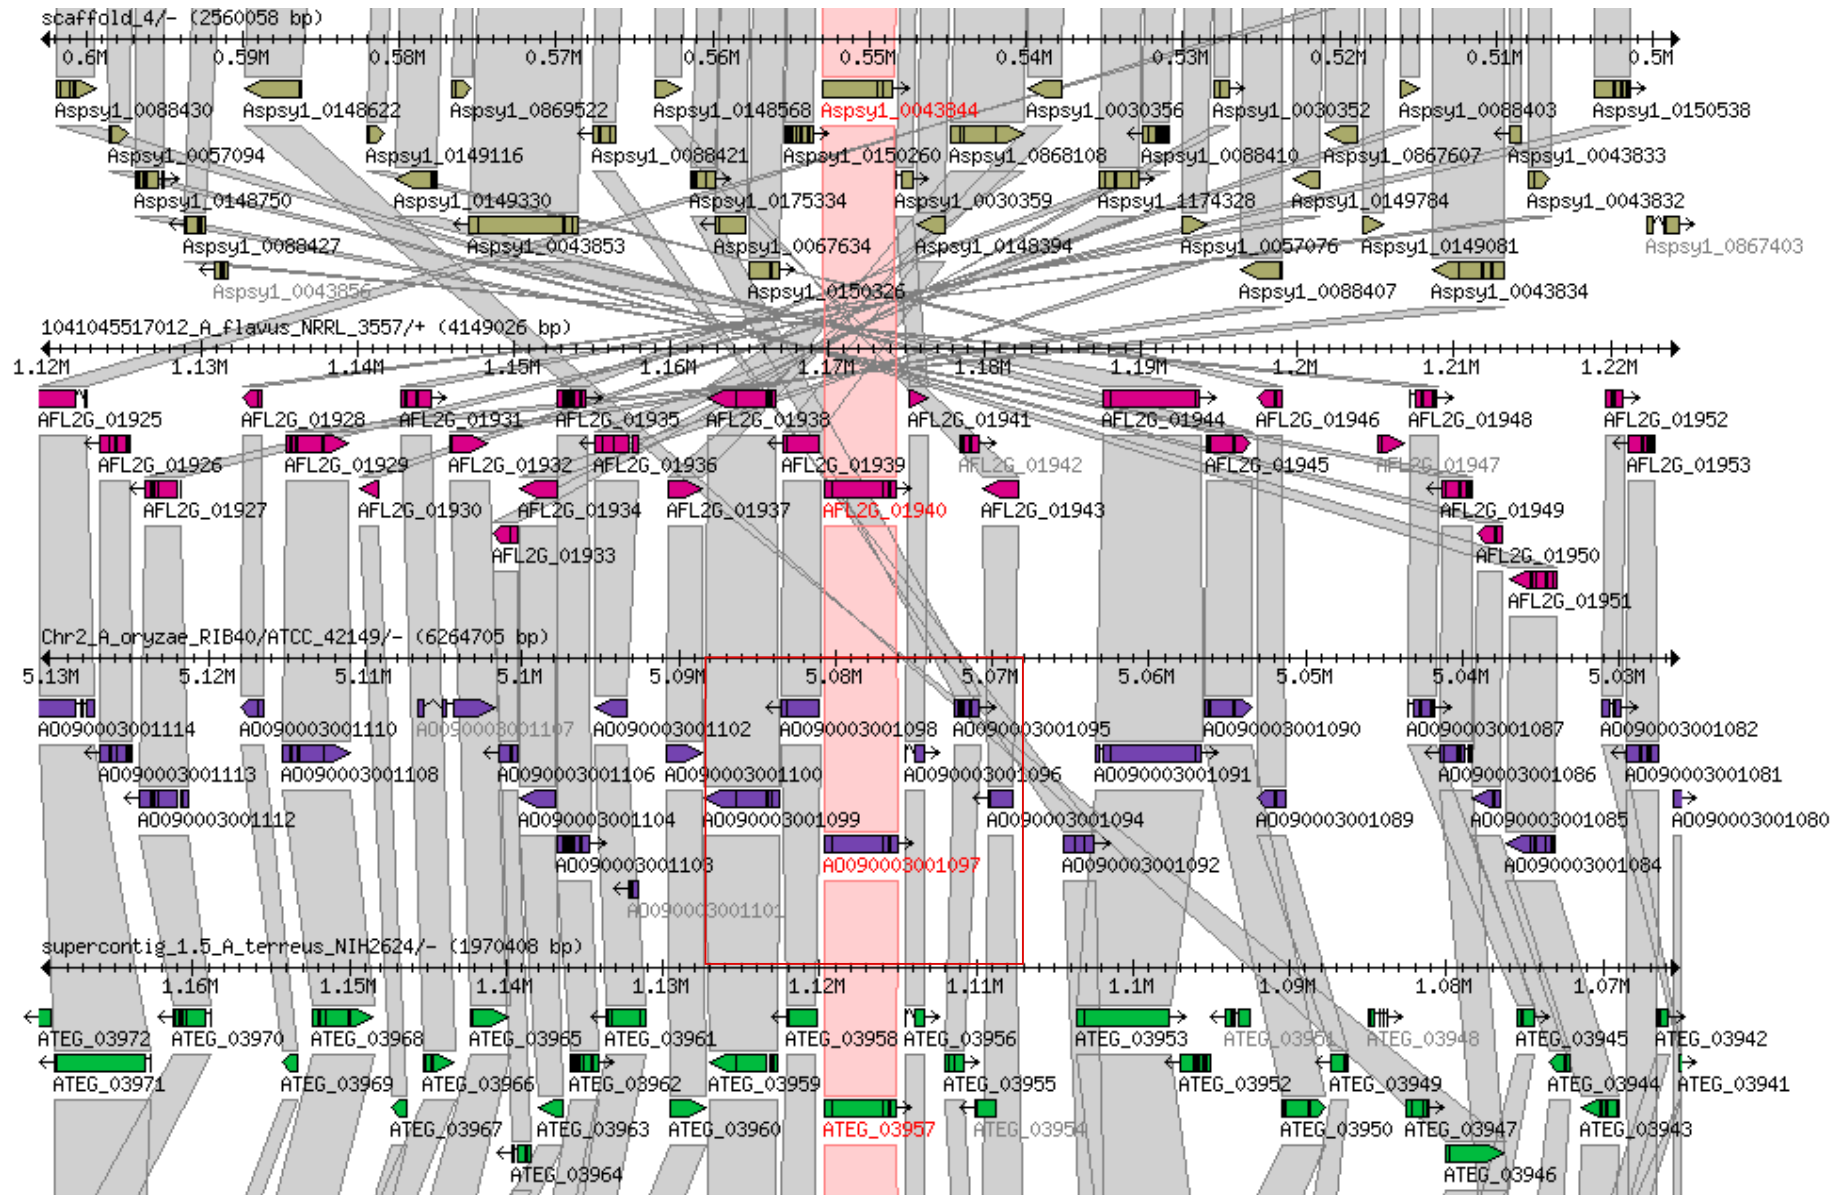

**AO090003001097 cluster**

| Gene id (SMURF) | Gene positions | Gene distance | Gene Name | Annotated_gene_function                                                                                                                                                                                                                    | antiSMASH ID | AspGD ID       |     |
|-----------------|----------------|---------------|-----------|--------------------------------------------------------------------------------------------------------------------------------------------------------------------------------------------------------------------------------------------|--------------|----------------|-----|
| n/a             |                |               |           | Ortholog(s) have proton-transporting ATPase activity, rotational mechanism activity and role in polyphosphate metabolic process, protein complex assembly, proton transport, vacuolar acidification                                        | prot_ID_1229 | AO090003001090 |     |
| n/a             |                |               |           | Ortholog(s) have peptidase activator activity, proteasome binding activity, role in proteasome assembly, regulation of proteasomal protein catabolic process and nucleus, proteasome core complex localization                             | prot_ID_394  | AO090003001091 |     |
| n/a             |                |               |           | Ortholog(s) have dolichyl-phosphate-mannose-glycolipid alpha-mannosyltransferase activity, role in GPI anchor biosynthetic process and integral to endoplasmic reticulum membrane, mannosyltransferase complex, mitochondrion localization | prot_ID_972  | AO090003001092 |     |
| n/a             |                |               |           | Ortholog of <i>A. nidulans</i> FGSC A4 : AN9473, <i>A. fumigatus</i> Af293 : Afu4g11270, <i>A. niger</i> CBS 513.88 : An04g05360, <i>A. niger</i> ATCC 1015 : 55020-mRNA and <i>A. versicolor</i> : Aspve1_0694359                         | prot_ID_927  | AO090003001094 | ECS |
| n/a             |                |               |           | Domain(s) with predicted oxidoreductase activity and role in oxidation-reduction process                                                                                                                                                   | prot_ID_1435 | AO090003001095 |     |
| n/a             |                |               |           | Carbonic anhydrase; predominantly expressed in the basal region of hyphae                                                                                                                                                                  | prot_ID_678  | AO090003001096 |     |
| n/a             |                |               |           | Non-ribosomal peptide synthetase/alpha-aminoadipate reductase                                                                                                                                                                              | prot_ID_328  | AO090003001097 |     |
| n/a             |                |               |           | Ortholog of <i>A. nidulans</i> FGSC A4 : AN5612, <i>A. fumigatus</i> Af293 : Afu4g11230, <i>A. niger</i> CBS 513.88 : An04g05430, <i>A. niger</i> ATCC 1015 : 51205-mRNA and <i>A. versicolor</i> : Aspve1_0131376                         | prot_ID_98   | AO090003001098 |     |
| n/a             |                |               |           | Ortholog(s) have xanthine dehydrogenase activity and role in purine nucleobase catabolic process                                                                                                                                           | prot_ID_1149 | AO090003001099 | ECS |
| n/a             |                |               |           | Ortholog(s) have role in plasma membrane fusion involved in cytogamy, response to pheromone and mating projection tip localization                                                                                                         | prot_ID_791  | AO090003001100 |     |
| n/a             |                |               |           | Protein of unknown function                                                                                                                                                                                                                | prot_ID_55   | AO090003001101 |     |
| n/a             |                |               |           | Ortholog of <i>A. nidulans</i> FGSC A4 : AN5615, <i>A. fumigatus</i> Af293 : Afu4g11200, <i>A. niger</i> CBS 513.88 : An04g05480, <i>A. niger</i> ATCC 1015 : 45401-mRNA and <i>Aspergillus versicolor</i> : Aspve1_0084260                | prot_ID_1913 | AO090003001102 |     |
| n/a             |                |               |           | Ortholog(s) have kynurenine-oxoglutarate transaminase activity, role in kynurenine acid biosynthetic process and mitochondrion localization                                                                                                | prot_ID_792  | AO090003001103 |     |
| n/a             |                |               |           | Ortholog(s) have enzyme activator activity, single-stranded DNA-dependent ATPase activity, role in DNA replication, Okazaki fragment processing, DNA strand renaturation, regulation of DNA repair and cytoplasm, nucleus localization     | prot_ID_1572 | AO090003001104 |     |

n/a

Ortholog(s) have structural constituent of cytoskeleton activity and role in microtubule nucleation, proteasomal ubiquitin-dependent protein catabolic process, spindle pole body duplication associated with nuclear envelope

prot\_ID\_50

AO090003001106

## A0090003001545 cluster

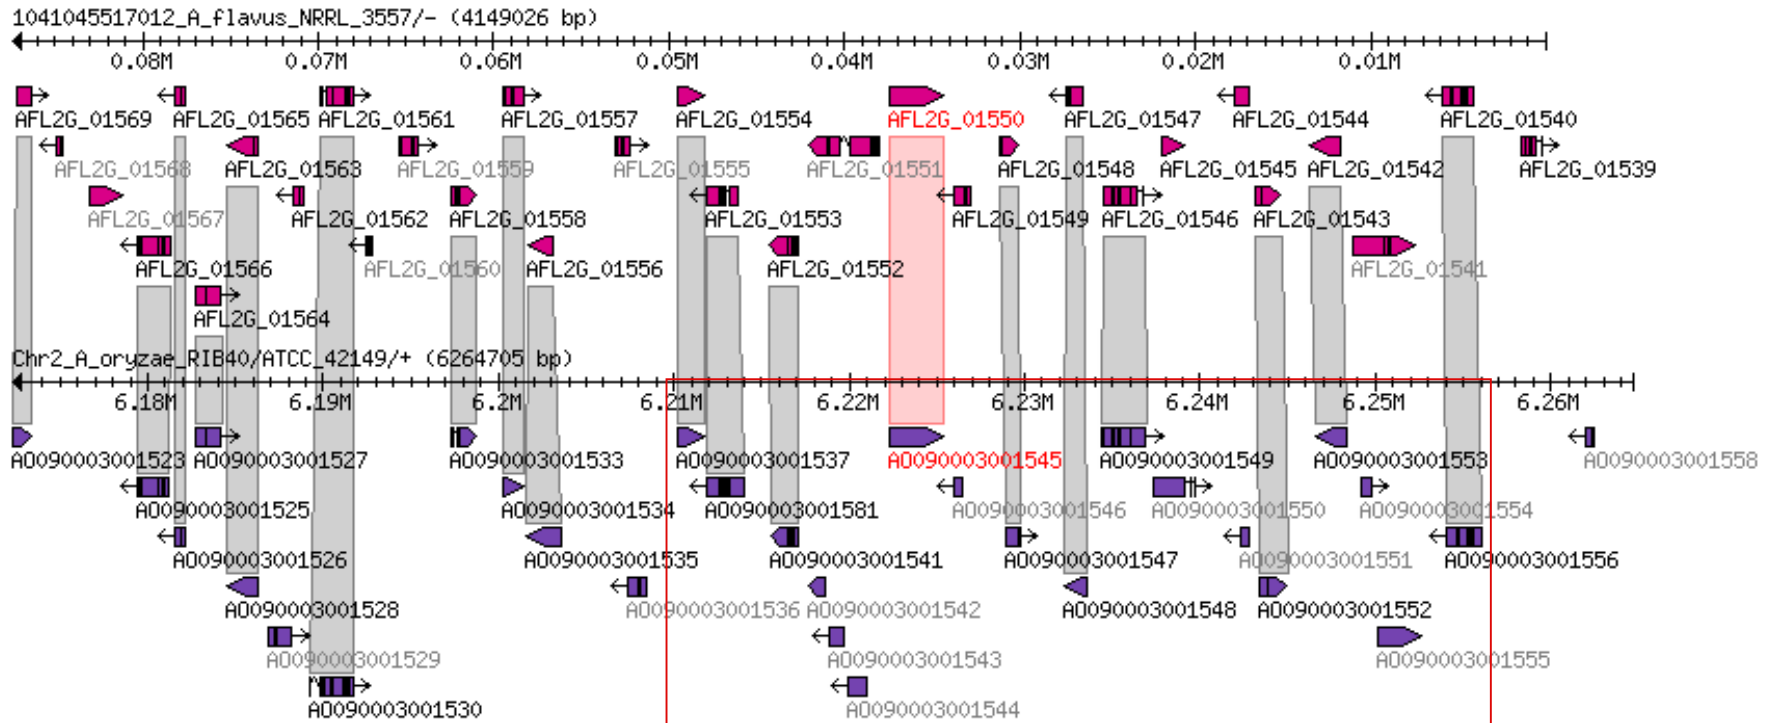



**AO090003001545 cluster**

| Gene id (SMURF)       | Gene positions | Gene distance | Gene Name | Annotated_gene_function                                                                                                                                                                                                                                                        | antiSMASH ID | AspGD ID       |     |
|-----------------------|----------------|---------------|-----------|--------------------------------------------------------------------------------------------------------------------------------------------------------------------------------------------------------------------------------------------------------------------------------|--------------|----------------|-----|
| AO090003001556        | -11            | 1566          |           | Domain(s) with predicted substrate-specific transmembrane transporter activity, role in transmembrane transport and integral to membrane localization                                                                                                                          | n/a          | AO090003001556 | ECS |
| AO090003001555        | -10            | 307           |           | Protein of unknown function                                                                                                                                                                                                                                                    | n/a          | AO090003001555 |     |
| AO090003001554        | -9             | 794           |           | Protein of unknown function                                                                                                                                                                                                                                                    | n/a          | AO090003001554 |     |
| AO090003001553        | -8             | 1539          |           | Ortholog of <i>A. flavus</i> NRRL 3357 : AFL2T_01542<br>Domain(s) with predicted DNA binding, site-specific DNA-methyltransferase (cytosine-N4-specific) activity, role in N-4 methylation of cytosine, transmembrane transport and integral to membrane localization          | n/a          | AO090003001553 |     |
| AO090003001552        | -7             | 667           |           |                                                                                                                                                                                                                                                                                | prot_ID_1561 | AO090003001552 |     |
| AO090003001551        | -6             | 2558          |           | Domain(s) with predicted catalytic activity and role in metabolic process                                                                                                                                                                                                      | prot_ID_1074 | AO090003001551 |     |
| AO090003001550        | -5             | 1558          |           | Domain(s) with predicted transferase activity, transferring phosphorus-containing groups activity                                                                                                                                                                              | prot_ID_343  | AO090003001550 |     |
| AO090003001549        | -4             | 1196          |           | Domain(s) with predicted transporter activity, role in oligopeptide transport and membrane localization                                                                                                                                                                        | prot_ID_1482 | AO090003001549 |     |
| AO090003001548        | -3             | 2868          |           | Ortholog of <i>A. nidulans</i> FGSC A4 : AN5399, <i>A. fumigatus</i> Af293 : Afu2g15280, <i>A. niger</i> CBS 513.88 : An18g02600, <i>A. niger</i> ATCC 1015 : 42737-mRNA and <i>A. versicolor</i> : Aspve1_0045700                                                             | prot_ID_845  | AO090003001548 |     |
| AO090003001547        | -2             | 2442          |           | Ortholog of <i>A. niger</i> CBS 513.88 : An06g00960, An05g01080, <i>A. brasiliensis</i> : Aspbr1_0186106, <i>A. flavus</i> NRRL 3357 : AFL2T_01548 and <i>A. clavatus</i> NRRL 1 : ACLA_003370                                                                                 | prot_ID_1748 | AO090003001547 |     |
| AO090003001546        | -1             | 543           |           | Protein of unknown function                                                                                                                                                                                                                                                    | prot_ID_1128 | AO090003001546 |     |
| <b>AO090003001545</b> | 0              | 0             |           | Non-ribosomal peptide synthetase<br>Domain(s) with predicted electron carrier activity, heme binding, iron ion binding, oxidoreductase activity, acting on paired donors, with incorporation or reduction of molecular oxygen activity and role in oxidation-reduction process | prot_ID_1050 | AO090003001545 |     |
| AO090003001544        | 1              | 1161          |           | Domain(s) with predicted sequence-specific DNA binding RNA polymerase II transcription factor activity, zinc ion binding activity, role in regulation of transcription, DNA-dependent and nucleus localization                                                                 | prot_ID_436  | AO090003001544 |     |
| AO090003001543        | 2              | 260           |           |                                                                                                                                                                                                                                                                                | prot_ID_1567 | AO090003001543 |     |
| AO090003001542        | 3              | 323           |           | Protein of unknown function                                                                                                                                                                                                                                                    | prot_ID_475  | AO090003001542 |     |
| AO090003001541        | 4              | 601           |           | Monocarboxylate transporter-like protein; predominantly expressed in the basal region of hyphae                                                                                                                                                                                | prot_ID_773  | AO090003001541 |     |
| n/a                   |                |               |           | Ortholog of <i>A. flavus</i> NRRL 3357 : AFL2T_01553                                                                                                                                                                                                                           | prot_ID_1938 | AO090003001581 |     |
| n/a                   |                |               |           | Ortholog of <i>A. flavus</i> NRRL 3357 : AFL2T_01554                                                                                                                                                                                                                           | prot_ID_1016 | AO090003001537 | ECS |

n/a  
n/a

Protein of unknown function  
Protein of unknown function

prot\_ID\_210 AO090003001536  
prot\_ID\_1703 AO090003001535

## A090005000688 cluster

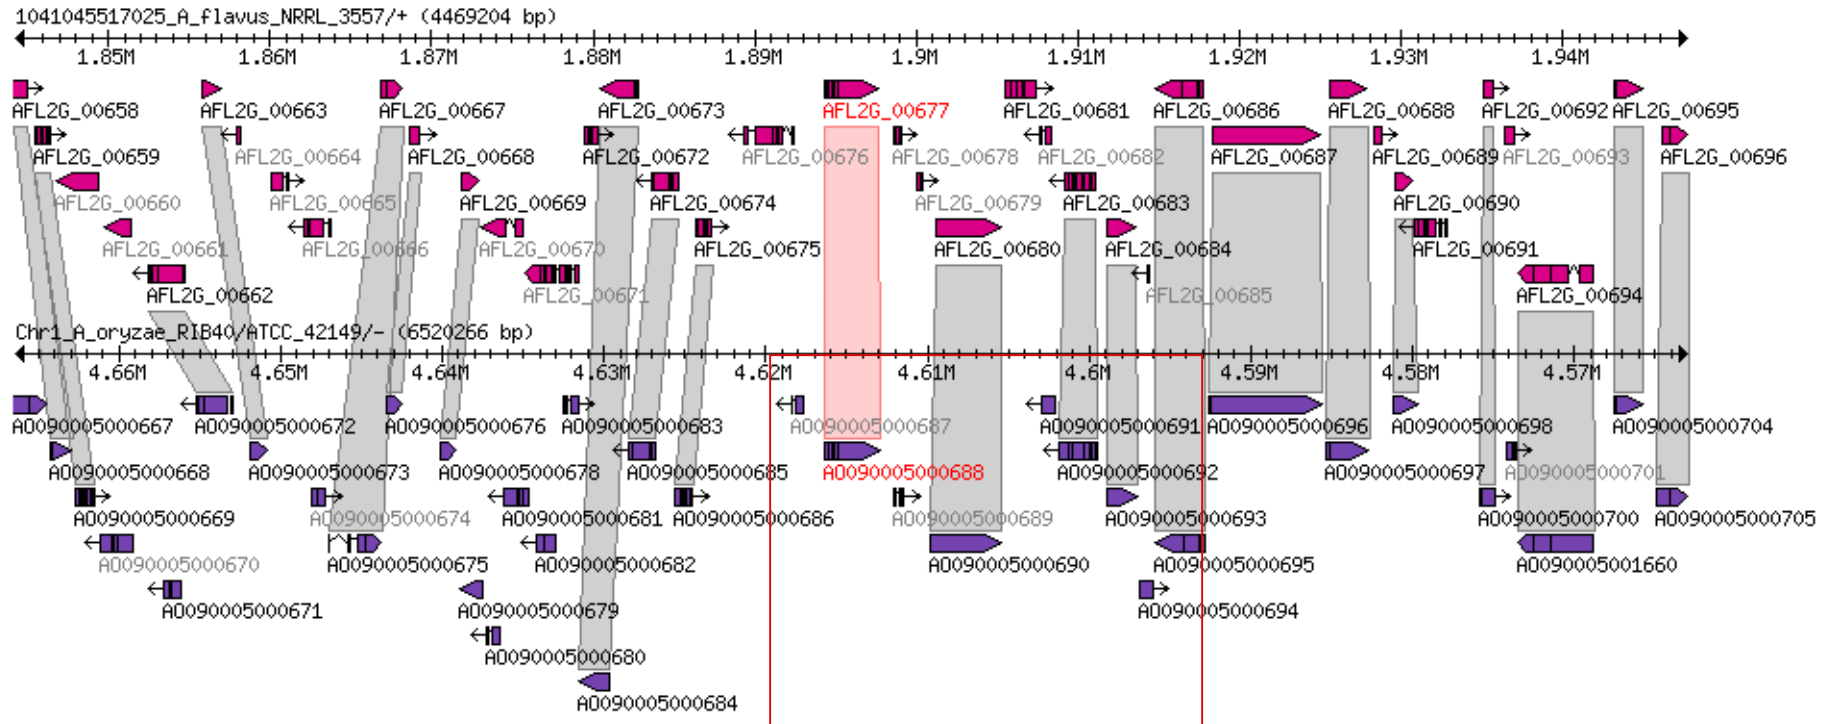

**AO090005000688 cluster**

| Gene id (SMURF)       | Gene positions | Gene distance | Gene Name | Annotated_gene_function                                                                                                                                                                                                        | antiSMASH ID | AspGD ID           |
|-----------------------|----------------|---------------|-----------|--------------------------------------------------------------------------------------------------------------------------------------------------------------------------------------------------------------------------------|--------------|--------------------|
| n/a                   |                |               |           | Domain(s) with predicted oxidoreductase activity, acting on the aldehyde or oxo group of donors, NAD or NADP as acceptor activity and role in oxidation-reduction process                                                      | prot_ID_9    | AO090005000681     |
| n/a                   |                |               |           | Putative hydrolase                                                                                                                                                                                                             | prot_ID_1495 | AO090005000682     |
| n/a                   |                |               |           | Domain(s) with predicted 3-hydroxyanthranilate 3,4-dioxygenase activity, iron ion binding activity and role in oxidation-reduction process                                                                                     | prot_ID_347  | AO090005000683     |
| n/a                   |                |               |           | Domain(s) with predicted DNA binding, zinc ion binding activity, role in transcription, DNA-dependent and nucleus localization                                                                                                 | prot_ID_1705 | AO090005000684     |
| n/a                   |                |               |           | Ortholog of A. flavus NRRL 3357 : AFL2T_00674, A. versicolor : Aspve1_0083731 and A. sydowii : Aspsy1_0162677                                                                                                                  | prot_ID_912  | AO090005000685     |
| n/a                   |                |               |           | Domain(s) with predicted hydrolase activity                                                                                                                                                                                    | prot_ID_1801 | AO090005000686     |
| n/a                   |                |               |           | Domain(s) with predicted catalytic activity, nucleotide binding activity and role in biosynthetic process                                                                                                                      | prot_ID_799  | AO090005000687 FA  |
| <b>AO090005000688</b> | 0              | 0             |           | Domain(s) with predicted ACP phosphopantetheine attachment site binding involved in fatty acid biosynthetic process, catalytic activity, nucleotide binding, phosphopantetheine binding activity and role in metabolic process | prot_ID_113  | AO090005000688     |
| AO090005000689        | 1              | 948           |           | Protein of unknown function                                                                                                                                                                                                    | prot_ID_1106 | AO090005000689     |
| AO090005000690        | 2              | 1973          |           | Non-ribosomal peptide synthetase                                                                                                                                                                                               | prot_ID_1611 | AO090005000690     |
| AO090005000691        | 3              | 2690          |           | Ortholog of A. nidulans FGSC A4 : AN11048, AN5410, A. fumigatus Af293 : Afu3g01150, Afu4g01120, A. niger CBS 513.88 : An12g10330, An11g03520, An02g14500 and A. niger ATCC 1015 : 205254-mRNA                                  | prot_ID_598  | AO090005000691     |
| AO090005000692        | 4              | 856           |           | Domain(s) with predicted carbon-nitrogen ligase activity, with glutamine as amido-N-donor, hydrolase activity, acting on carbon-nitrogen (but not peptide) bonds, in linear amides activity                                    | prot_ID_1746 | AO090005000692     |
| AO090005000693        | 5              | 912           |           | Domain(s) with predicted role in transmembrane transport and integral to membrane localization                                                                                                                                 | prot_ID_395  | AO090005000693     |
| n/a                   |                |               |           | Ortholog(s) have ureidoglycolate hydrolase activity                                                                                                                                                                            | prot_ID_1028 | AO090005000694     |
| n/a                   |                |               |           | Ortholog(s) have DNA-dependent ATPase activity, dinucleotide insertion or deletion binding, guanine/thymine mispair binding activity, role in mismatch repair, mitochondrial DNA repair and mitochondrion localization         | prot_ID_1669 | AO090005000695 ECS |
| n/a                   |                |               |           | Ortholog(s) have ATP-dependent RNA helicase activity, role in spliceosome conformational change to release U4 (or U4atac) and U1 (or U11) and U4/U6 x U5 tri-snRNP complex, U5 snRNP localization                              | prot_ID_537  | AO090005000696     |

## A090005000798 cluster

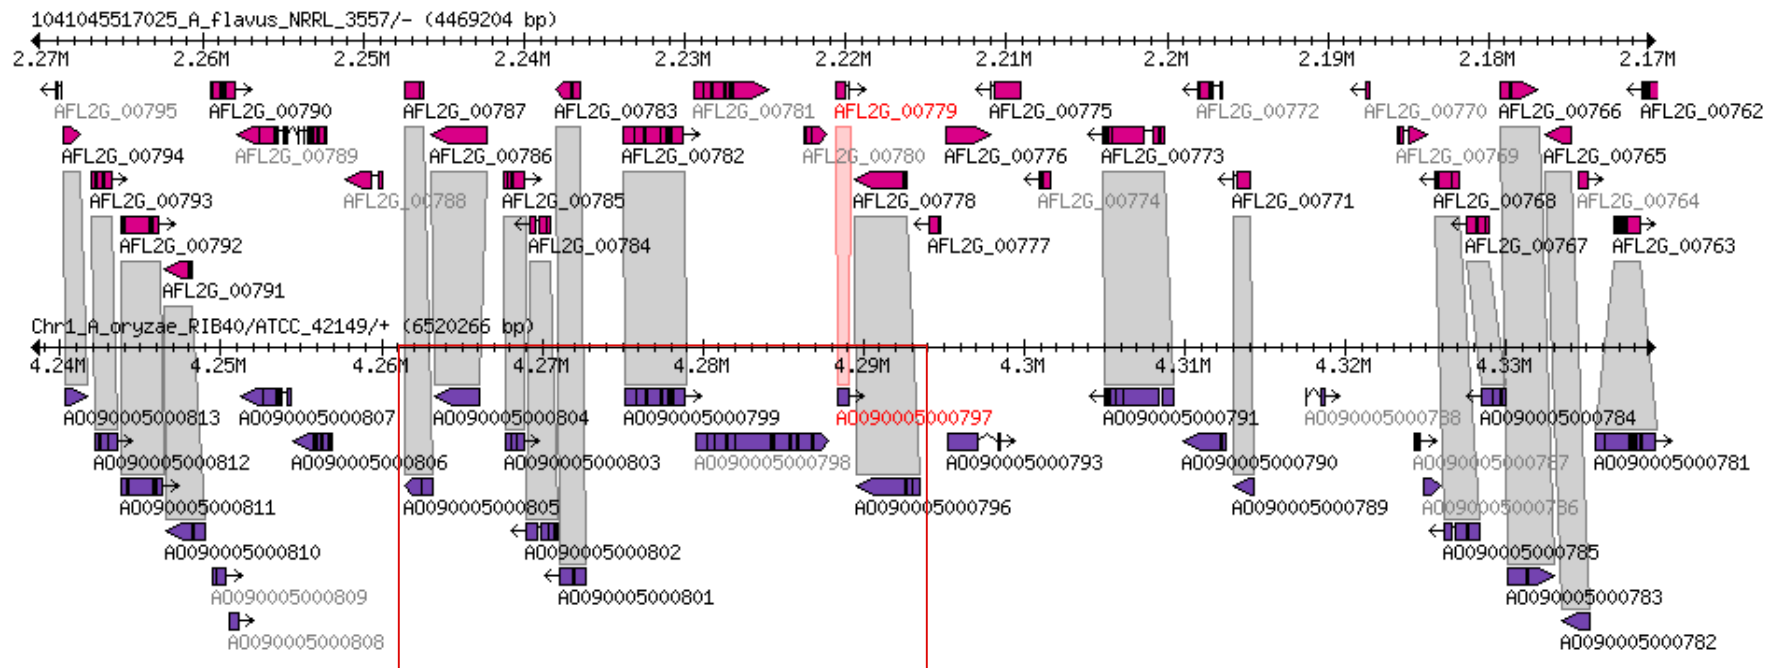

**AO090005000798 cluster**

| Gene id (SMURF) | Gene positions | Gene distance | Gene Name | Annotated_gene_function                                                                                                                                                                                 | antiSMASH ID | AspGD ID       |     |
|-----------------|----------------|---------------|-----------|---------------------------------------------------------------------------------------------------------------------------------------------------------------------------------------------------------|--------------|----------------|-----|
| n/a             |                |               |           | Ortholog of A. nidulans FGSC A4 : AN0287, A. fumigatus Af293 : Afu1g02990, A. niger ATCC 1015 : 170766-mRNA, N. fischeri NRRL 181 : NFIA_021640 and A. flavus NRRL 3357 : AFL2T_00773                   | prot_ID_1851 | AO090005000791 |     |
| n/a             |                |               |           | Ortholog(s) have role in mRNA splicing, via spliceosome and U2-type catalytic step 1 spliceosome, U2-type spliceosomal complex localization                                                             | prot_ID_1025 | AO090005000793 |     |
| n/a             |                |               |           | Ortholog of A. nidulans FGSC A4 : AN9448, A. fumigatus Af293 : Afu1g03030, A. niger ATCC 1015 : 51952-mRNA, A. versicolor : Aspve1_0048537 and A. sydowii : Aspsy1_0628822                              | prot_ID_388  | AO090005000796 | ECS |
| n/a             |                |               |           | Domain(s) with predicted metal ion binding, phosphoric diester hydrolase activity                                                                                                                       | prot_ID_156  | AO090005000797 |     |
| n/a             |                |               |           | Polyketide synthase                                                                                                                                                                                     | prot_ID_1842 | AO090005000798 |     |
| n/a             |                |               |           | Domain(s) with predicted ATP binding, calcium-transporting ATPase activity, metal ion binding activity, role in ATP biosynthetic process, calcium ion transmembrane transport and membrane localization | prot_ID_439  | AO090005000799 |     |
| n/a             |                |               |           | Ortholog of A. nidulans FGSC A4 : AN4149, A. flavus NRRL 3357 : AFL2T_00783, A. versicolor : Aspve1_0168074, Aspve1_0655563 and A. sydowii : Aspsy1_0153723                                             | prot_ID_1167 | AO090005000801 |     |
| n/a             |                |               |           | Ortholog of A. nidulans FGSC A4 : AN3415, A. fumigatus Af293 : Afu8g01570, N. fischeri NRRL 181 : NFIA_095060, A. flavus NRRL 3357 : AFL2T_00784 and A. versicolor : Aspve1_0126965                     | prot_ID_1646 | AO090005000802 |     |
| n/a             |                |               |           | Ortholog of A. nidulans FGSC A4 : AN9450, A. fumigatus Af293 : Afu1g03040, A. niger CBS 513.88 : An01g05230, A. niger ATCC 1015 : 51951-mRNA and A. versicolor : Aspve1_0231478                         | prot_ID_482  | AO090005000803 |     |
| n/a             |                |               |           | Domain(s) with predicted ATP binding, DNA binding, helicase activity                                                                                                                                    | prot_ID_1925 | AO090005000804 |     |
| n/a             |                |               |           | Ortholog of A. brasiliensis : Aspbr1_0053309, A. flavus NRRL 3357 : AFL2T_00787, A. acidus : Aspfo1_0052424 and A. niger ATCC 1015 : 52513-mRNA                                                         | prot_ID_504  | AO090005000805 | ECS |

## AO090005000952 cluster

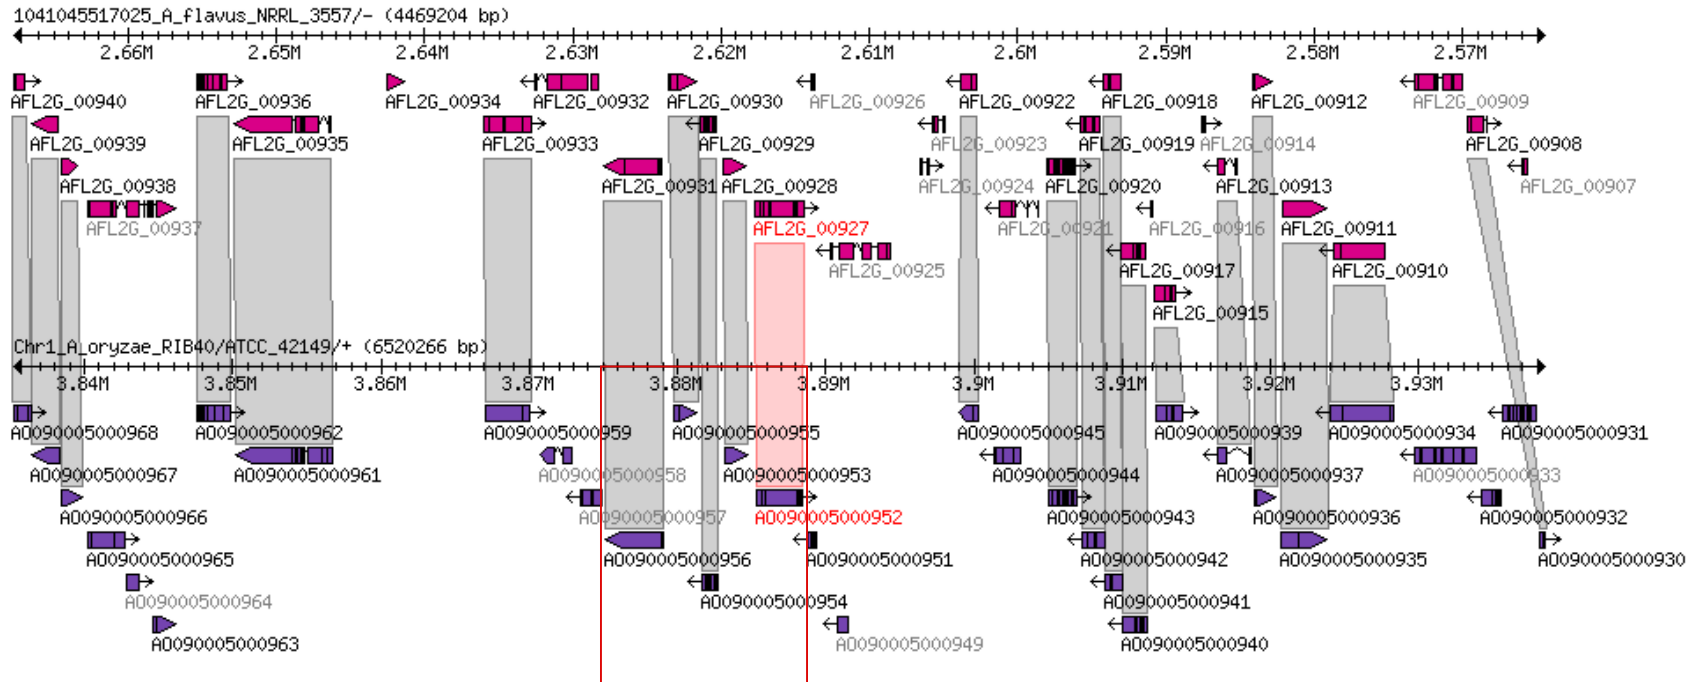

**AO090005000952 cluster**

| Gene id (SMURF)       | Gene positions | Gene distance | Gene Name | Annotated_gene_function                                                                                                                                                     | antiSMASH ID | AspGD ID           |
|-----------------------|----------------|---------------|-----------|-----------------------------------------------------------------------------------------------------------------------------------------------------------------------------|--------------|--------------------|
| n/a                   |                |               |           | Domain(s) with predicted N-acetyltransferase activity and role in metabolic process                                                                                         | prot_ID_166  | AO090005000942     |
| n/a                   |                |               |           | Domain(s) with predicted N,N-dimethylaniline monooxygenase activity, NADP binding, flavin adenine dinucleotide binding activity and role in oxidation-reduction process     | prot_ID_941  | AO090005000943     |
| n/a                   |                |               |           | Ortholog of A. niger CBS 513.88 : An11g06490, An18g01440, A. brasiliensis : Aspbr1_0210166, A. acidus : Aspfo1_0049126, Aspfo1_0123750 and A.s versicolor : Aspve1_0145746  | prot_ID_1810 | AO090005000944     |
| n/a                   |                |               |           | Ortholog of N. fischeri NRRL 181 : NFIA_115130, A. flavus NRRL 3357 : AFL2T_00922, A. clavatus NRRL 1 : ACLA_065130 and A. versicolor : Aspve1_0057776                      | prot_ID_703  | AO090005000945     |
| n/a                   |                |               |           | Protein of unknown function                                                                                                                                                 | prot_ID_163  | AO090005000949     |
| n/a                   |                |               |           | Ortholog of A. nidulans FGSC A4 : AN10907, A. fumigatus Af293 : Afu5g00975, A. brasiliensis : Aspbr1_0198422, A. acidus : Aspfo1_0081662 and A. versicolor : Aspve1_0069870 | prot_ID_965  | AO090005000951     |
| <b>AO090005000952</b> | 0              | 0             |           | <b>Non-ribosomal peptide synthetase</b>                                                                                                                                     | prot_ID_1511 | AO090005000952 ECS |
| AO090005000953        | 1              | 595           |           | <b>Domain(s) with predicted transporter activity, role in transmembrane transport and integral to membrane localization</b>                                                 | prot_ID_705  | AO090005000953     |
| AO090005000954        | 2              | 502           |           | <b>Domain(s) with predicted aminopeptidase activity and role in proteolysis</b>                                                                                             | prot_ID_368  | AO090005000954     |
| AO090005000955        | 3              | 220           |           | <b>Ortholog(s) have sequence-specific DNA binding, sequence-specific DNA binding transcription factor activity</b>                                                          | prot_ID_1288 | AO090005000955     |
| n/a                   |                |               |           | <b>Domain(s) with predicted hydrolase activity</b>                                                                                                                          | prot_ID_81   | AO090005000956 ECS |
| n/a                   |                |               |           | Protein of unknown function                                                                                                                                                 | prot_ID_1010 | AO090005000957     |
| n/a                   |                |               |           | Protein of unknown function                                                                                                                                                 | prot_ID_183  | AO090005000958     |
| n/a                   |                |               |           | Ortholog of A. fumigatus Af293 : Afu8g04920, A. niger CBS 513.88 : An12g10470, An18g01890, A. oryzae RIB40 : AO090701000445 and A. niger ATCC 1015 : 45984-mRNA, 54098-mRNA | prot_ID_1512 | AO090005000959     |



## AO090005000961 cluster

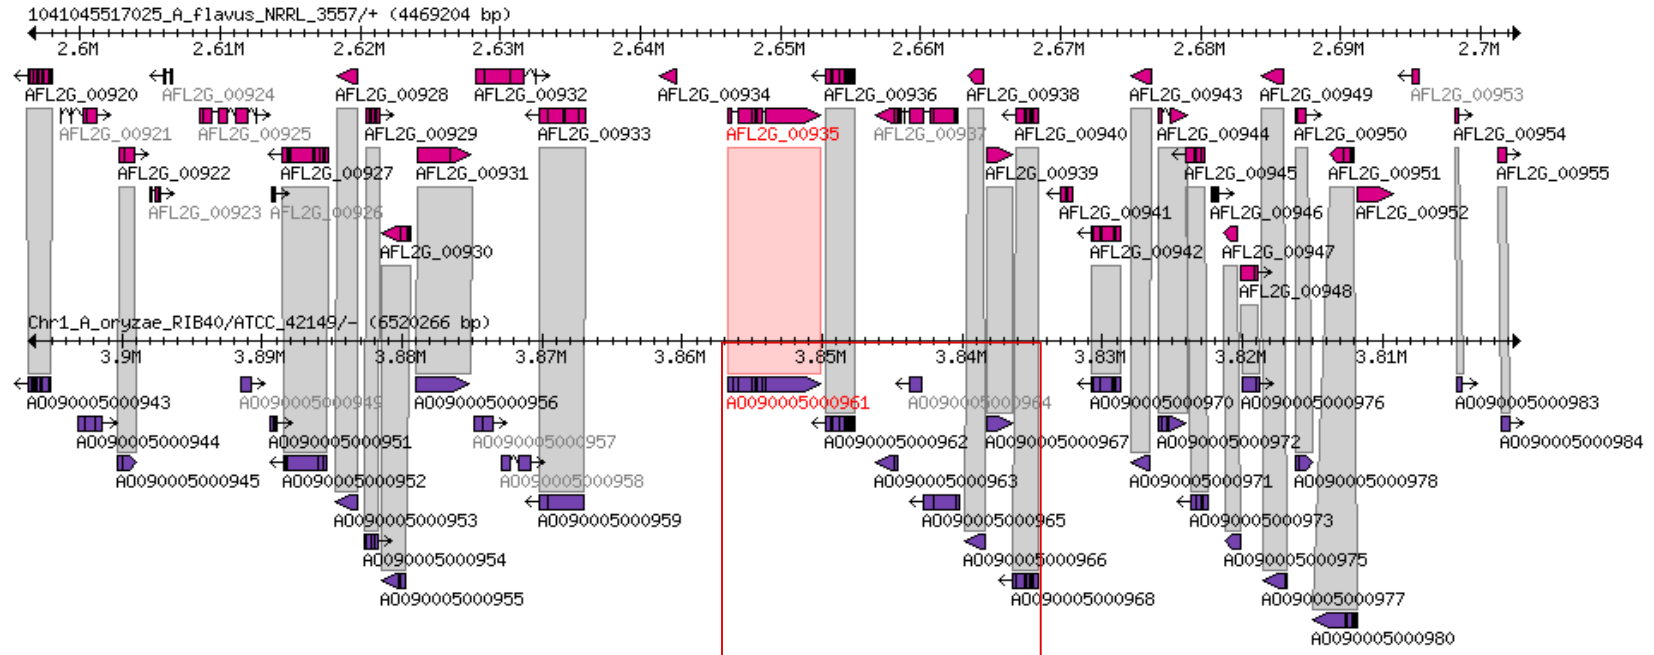

**AO090005000961 cluster**

| Gene id (SMURF)       | Gene positions | Gene distance | Gene Name | Annotated_gene_function                                                                                                                                                     | antiSMASH ID | AspGD ID           |
|-----------------------|----------------|---------------|-----------|-----------------------------------------------------------------------------------------------------------------------------------------------------------------------------|--------------|--------------------|
| n/a                   |                |               |           | Domain(s) with predicted hydrolase activity                                                                                                                                 | prot_ID_81   | AO090005000956     |
| n/a                   |                |               |           | Protein of unknown function                                                                                                                                                 | prot_ID_1010 | AO090005000957     |
| n/a                   |                |               |           | Protein of unknown function                                                                                                                                                 | prot_ID_183  | AO090005000958     |
| n/a                   |                |               |           | Ortholog of A. fumigatus Af293 : Afu8g04920, A. niger CBS 513.88 : An12g10470, An18g01890, A. oryzae RIB40 : AO090701000445 and A. niger ATCC 1015 : 45984-mRNA, 54098-mRNA | prot_ID_1512 | AO090005000959     |
| <b>AO090005000961</b> | 0              | 0             |           | <b>Polyketide synthase</b>                                                                                                                                                  | prot_ID_6    | AO090005000961 ECS |
| AO090005000962        | 1              | 536           |           | Ortholog(s) have role in cellular response to glucose stimulus and cytoplasm localization                                                                                   | prot_ID_1430 | AO090005000962     |
| AO090005000963        | 2              | 1461          |           | Domain(s) with predicted transporter activity, role in transmembrane transport and integral to membrane localization                                                        | prot_ID_436  | AO090005000963     |
| AO090005000964        | 3              | 905           |           |                                                                                                                                                                             | prot_ID_1271 | AO090005000964     |
| AO090005000965        | 4              | 530           |           | Domain(s) with predicted ATP binding, nucleoside-triphosphatase activity                                                                                                    | prot_ID_592  | AO090005000965     |
| AO090005000966        | 5              | 774           |           | Ortholog of A. flavus NRRL 3357 : AFL2T_00938 and A. versicolor : Aspve1_0390716                                                                                            | prot_ID_1982 | AO090005000966     |
| AO090005000967        | 6              | 283           |           | Domain(s) with predicted nucleotide binding, oxidoreductase activity and role in metabolic process                                                                          | prot_ID_982  | AO090005000967     |
| AO090005000968        | 7              | 119           |           | Major facilitator superfamily (MFS) transporter; upregulated by exposure to benomyl                                                                                         | prot_ID_1818 | AO090005000968 ECS |
|                       |                |               |           | Domain(s) with predicted choline dehydrogenase activity, flavin adenine dinucleotide binding activity and role in alcohol metabolic process, oxidation-reduction process    | prot_ID_827  | AO090005000970     |

## AO090005000993 cluster

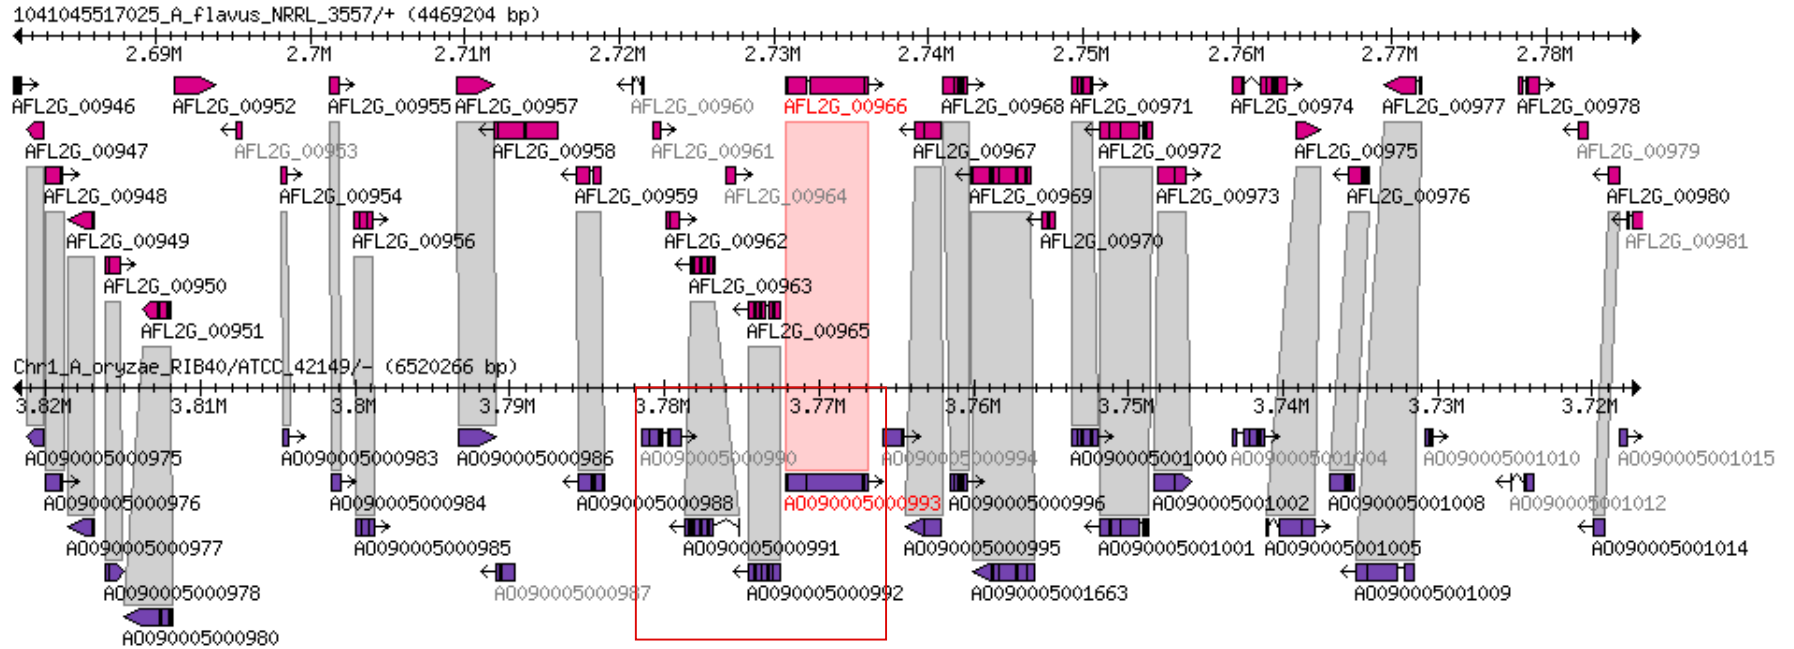

**AO090005000993 cluster**

| Gene id (SMURF)       | Gene positions | Gene distance | Gene Name | Annotated_gene_function                                                                                                                                                                                                                        | antiSMASH ID | AspGD ID           |
|-----------------------|----------------|---------------|-----------|------------------------------------------------------------------------------------------------------------------------------------------------------------------------------------------------------------------------------------------------|--------------|--------------------|
| n/a                   |                |               | xylA      | Beta-xylosidase, extracellular enzyme with a role in xylan degradation; key enzyme responsible for dark brown color produced in soy sauce brewing; induced by growth on xylose; positively regulated by XlnR; 3 XlnR binding sites in promoter | prot_ID_747  | AO090005000986     |
| n/a                   |                |               |           | Domain(s) with predicted ATP binding, ATPase activity                                                                                                                                                                                          | prot_ID_1951 | AO090005000987     |
| n/a                   |                |               |           | Ortholog of A. nidulans FGSC A4 : AN0638, A. fumigatus Af293 : Afu1g16870, A. niger ATCC 1015 : 170269-mRNA, A. versicolor : Aspve1_0119892 and A. sydowii : Aspsy1_0129541                                                                    | prot_ID_538  | AO090005000988     |
| AO090005000990        | -3             | 265           |           | Domain(s) with predicted sequence-specific DNA binding RNA polymerase II transcription factor activity, zinc ion binding activity, role in regulation of transcription, DNA-dependent and nucleus localization                                 | prot_ID_1274 | AO090005000990 ECS |
| AO090005000991        | -2             | 697           |           | Domain(s) with predicted transporter activity, role in transmembrane transport and integral to membrane localization                                                                                                                           | prot_ID_251  | AO090005000991     |
| AO090005000992        | -1             | 407           |           | Domain(s) with predicted catalytic activity and role in metabolic process                                                                                                                                                                      | prot_ID_1182 | AO090005000992     |
| <b>AO090005000993</b> | 0              | 0             |           | <b>Non-ribosomal peptide synthetase</b>                                                                                                                                                                                                        | prot_ID_95   | AO090005000993 ECS |
| AO090005000994        | 1              | 1140          |           | Protein of unknown function                                                                                                                                                                                                                    | prot_ID_862  | AO090005000994     |
| AO090005000995        | 2              | 678           |           | Ortholog(s) have sphingosine hydroxylase activity, role in ascospore formation, hyphal growth, sphingolipid biosynthetic process and endoplasmic reticulum membrane localization                                                               | prot_ID_1966 | AO090005000995     |
| AO090005000996        | 3              | 1136          |           | Putative microtubule-binding protein; alternative polyadenylation sites predicted                                                                                                                                                              | prot_ID_848  | AO090005000996     |
| AO090005001663        | 4              | 557           |           | Domain(s) with predicted 7S RNA binding, DNA binding, sequence-specific DNA binding RNA polymerase II transcription factor activity, zinc ion binding activity                                                                                 | prot_ID_1998 | AO090005001663     |
| AO090005001000        | 5              | 2754          |           | Domain(s) with predicted pyridoxal phosphate binding, transaminase activity                                                                                                                                                                    | prot_ID_1787 | AO090005001000     |
| AO090005001001        | 6              | 217           |           | Putative protein factor similar to Ysh1p involved in pre-mRNA 3'-end-processing                                                                                                                                                                | prot_ID_977  | AO090005001001     |
| n/a                   |                |               |           | Domain(s) with predicted role in DNA-dependent transcription, initiation and transcription factor TFIID complex localization                                                                                                                   | prot_ID_1567 | AO090005001002     |

## A090005001079 cluster

No manual prediction made

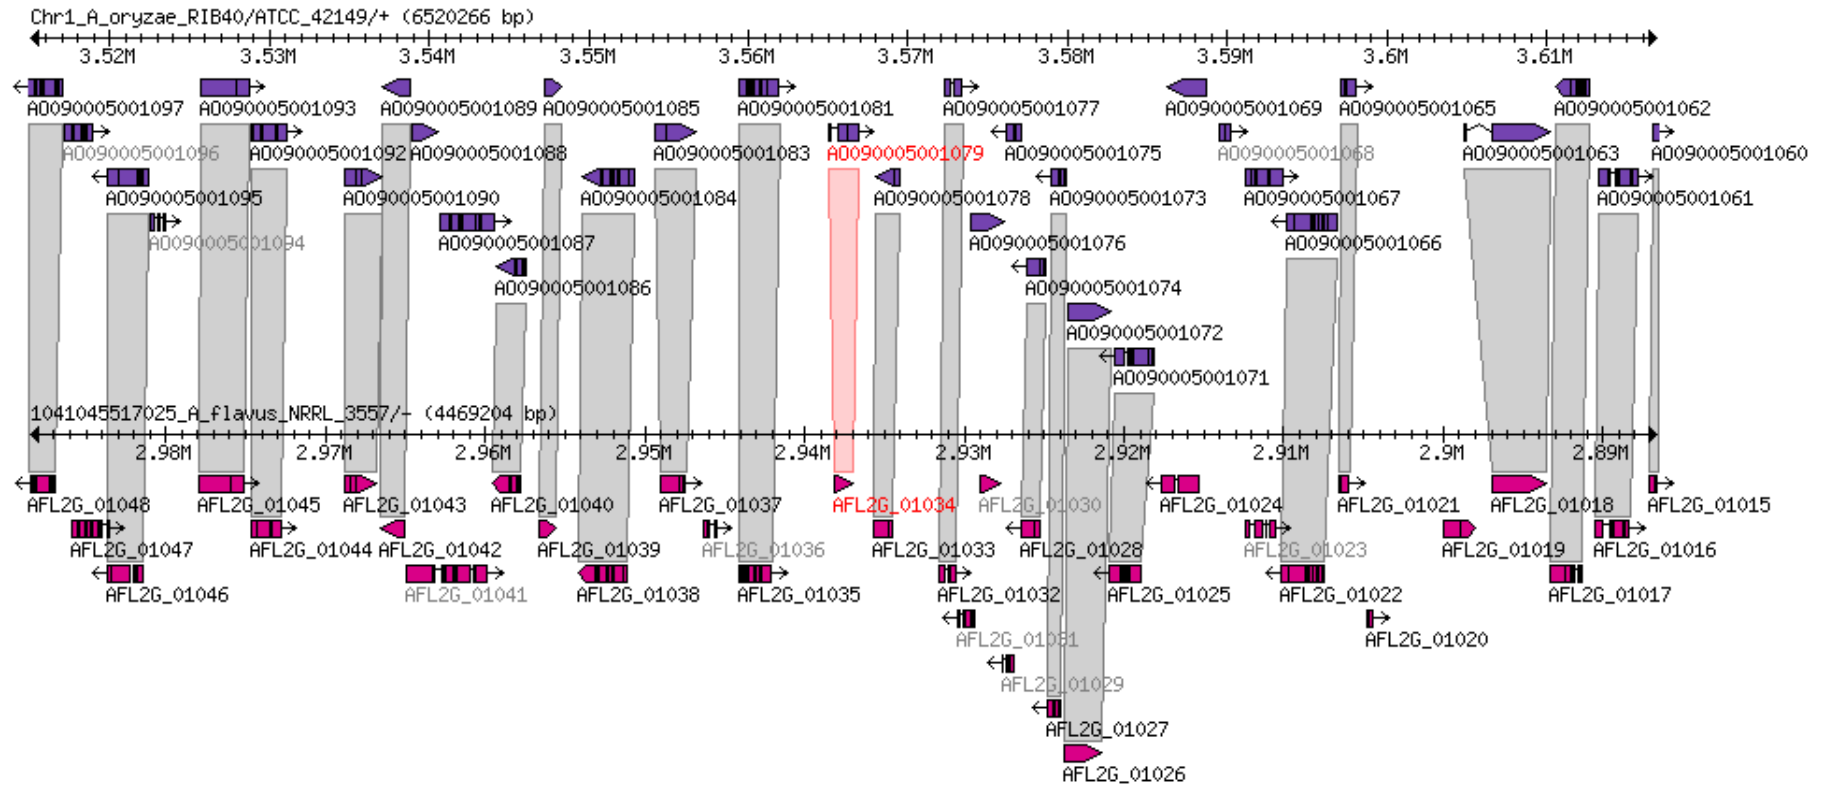

**AO090005001079 cluster**

| Gene id (SMURF)       | Gene positions | Gene distance | Gene Name | Annotated_gene_function                                                                                                                                                                                                             | antiSMASH ID | AspGD ID       |
|-----------------------|----------------|---------------|-----------|-------------------------------------------------------------------------------------------------------------------------------------------------------------------------------------------------------------------------------------|--------------|----------------|
| n/a                   |                |               |           | Ortholog of A. fumigatus Af293 : Afu1g16300, A. niger CBS 513.88 : An04g08050, An02g13120, An01g10860, A. oryzae RIB40 : AO090010000043/aoiC and A. versicolor : Aspve1_0116911                                                     | prot_ID_795  | AO090005001075 |
| n/a                   |                |               |           | Ortholog(s) have RNA-dependent ATPase activity                                                                                                                                                                                      | prot_ID_1235 | AO090005001076 |
| n/a                   |                |               |           | Ortholog(s) have proton-transporting ATPase activity, rotational mechanism, structural molecule activity and role in ATP synthesis coupled proton transport, cristae formation, protein oligomerization                             | prot_ID_1364 | AO090005001077 |
| AO090005001078        | -1             | 1239          |           | NAD+-dependent L-arabinitol 4-dehydrogenase; transcriptionally induced by growth on xylose; positively regulated by XlnR; 2 putative XlnR binding sites in the promoter                                                             | prot_ID_1735 | AO090005001078 |
| <b>AO090005001079</b> | 0              | 0             |           | <b>Putative dimethylallyl tryptophan synthase (DMAT)</b>                                                                                                                                                                            | prot_ID_1102 | AO090005001079 |
| AO090005001081        | 1              | 3305          |           | Domain(s) with predicted amino acid transmembrane transporter activity, role in amino acid transmembrane transport and membrane localization                                                                                        | prot_ID_330  | AO090005001081 |
| AO090005001083        | 2              | 3393          |           | Domain(s) with predicted role in cellular metabolic process                                                                                                                                                                         | n/a          | AO090005001083 |
| AO090005001084        | 3              | 1865          |           | Alpha-glucosidase                                                                                                                                                                                                                   | n/a          | AO090005001084 |
| AO090005001085        | 4              | 1556          |           | Domain(s) with predicted catalytic activity and role in metabolic process                                                                                                                                                           | n/a          | AO090005001085 |
| AO090005001086        | 5              | 1179          |           | Domain(s) with predicted substrate-specific transmembrane transporter activity, role in transmembrane transport and integral to membrane localization                                                                               | n/a          | AO090005001086 |
| AO090005001087        | 6              | 367           |           | Domain(s) with predicted DNA binding, sequence-specific DNA binding RNA polymerase II transcription factor activity, zinc ion binding activity and role in regulation of transcription, DNA-dependent, transcription, DNA-dependent | n/a          | AO090005001087 |

## AO090005001551 cluster

Probably an orphan PKS, no manual prediction made

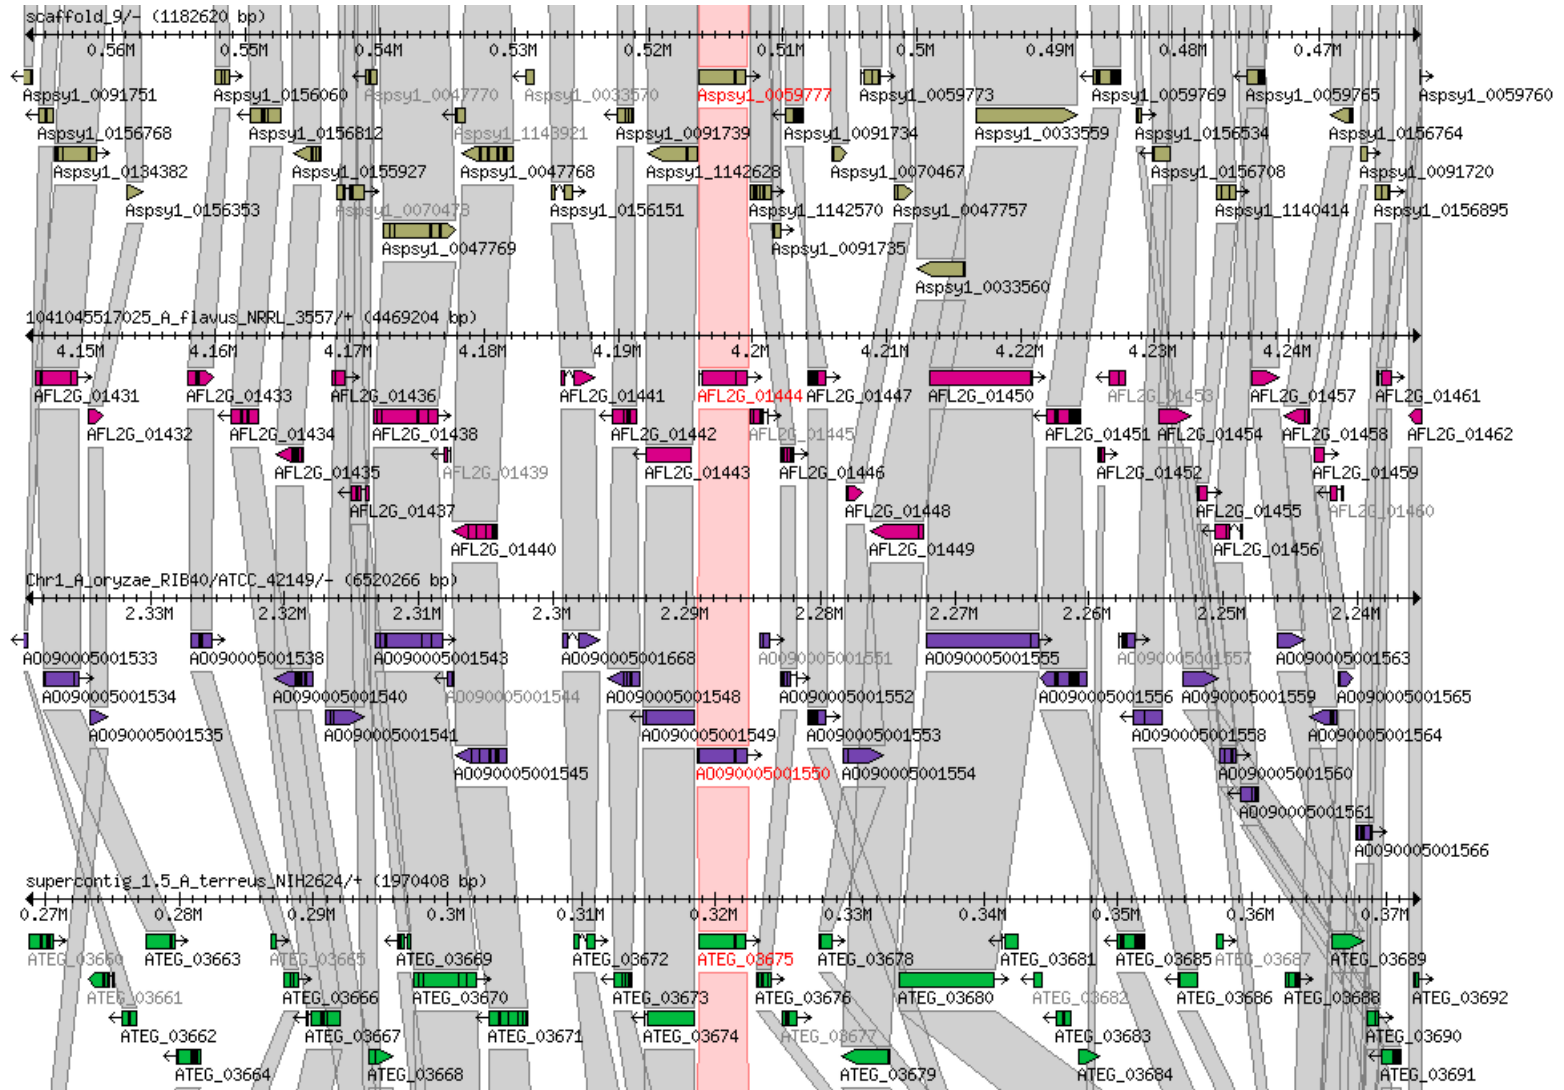

**AO090005001551 cluster**

| Gene id (SMURF) | Gene positions | Gene distance | Gene Name | Annotated_gene_function                                                                                                                                                                                   | antiSMASH ID | AspGD ID       |
|-----------------|----------------|---------------|-----------|-----------------------------------------------------------------------------------------------------------------------------------------------------------------------------------------------------------|--------------|----------------|
| n/a             |                |               |           | Domain(s) with predicted protein dimerization activity, sequence-specific DNA binding, sequence-specific DNA binding transcription factor activity and role in regulation of transcription, DNA-dependent | prot_ID_2010 | AO090005001668 |
| n/a             |                |               |           | Ortholog(s) have lipid binding activity and role in eisosome assembly, endocytosis, negative regulation of protein kinase activity, protein localization, response to heat                                | prot_ID_1527 | AO090005001548 |
| n/a             |                |               |           | Domain(s) with predicted endonuclease activity, single-stranded DNA binding activity, role in nucleotide-excision repair and nucleus localization                                                         | prot_ID_704  | AO090005001549 |
| n/a             |                |               |           | Ortholog(s) have role in endocytic recycling and endosome localization                                                                                                                                    | prot_ID_1283 | AO090005001550 |
| n/a             |                |               | csyD      | <b>Putative type III polyketide synthase</b>                                                                                                                                                              | prot_ID_1779 | AO090005001551 |
| n/a             |                |               |           | Putative acetylmannan esterase; transcriptionally regulated by ManR                                                                                                                                       | prot_ID_1199 | AO090005001552 |
| n/a             |                |               |           | Ortholog(s) have cellulase activity and role in xyloglucan catabolic process                                                                                                                              | prot_ID_7    | AO090005001553 |
| n/a             |                |               |           | Ortholog(s) have role in fungal-type cell wall organization, protein oligomerization and cellular bud, cytoplasm, membrane raft, plasma membrane localization                                             | prot_ID_1405 | AO090005001554 |
| n/a             |                |               |           | Ortholog(s) have 1-phosphatidylinositol-3-phosphate 5-kinase activity, phosphatidylinositol-3-phosphate binding activity and role in phosphatidylinositol phosphorylation                                 | prot_ID_1714 | AO090005001555 |



## AO090009000052 cluster

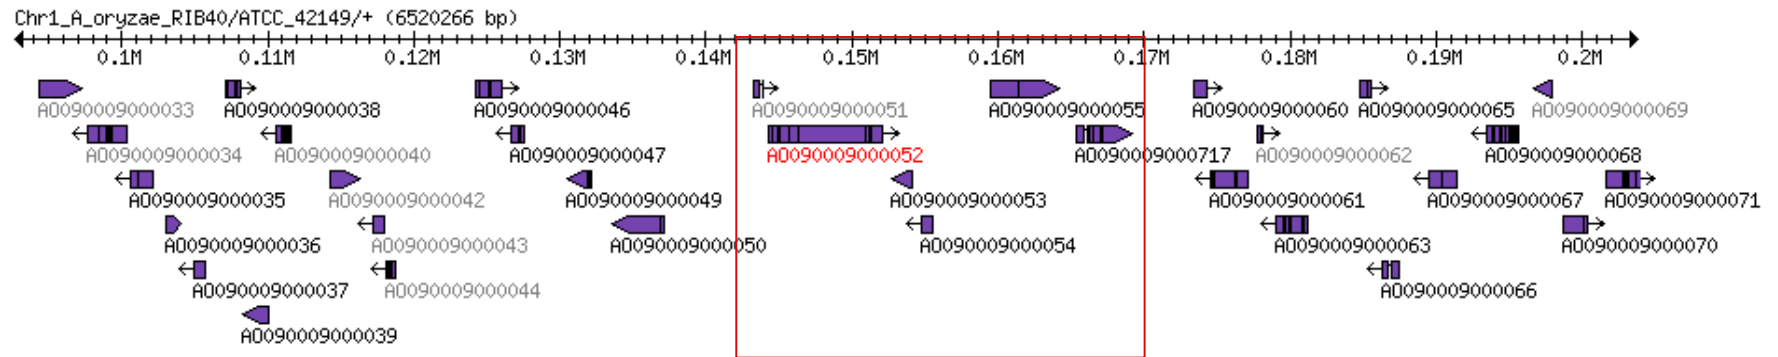

**AO090009000052 cluster**

| Gene id (SMURF) | Gene positions | Gene distance | Gene Name | Annotated_gene_function                                                                                                                                                                                        | antiSMASH ID | AspGD ID           |
|-----------------|----------------|---------------|-----------|----------------------------------------------------------------------------------------------------------------------------------------------------------------------------------------------------------------|--------------|--------------------|
| n/a             |                |               |           | Domain(s) with predicted role in transmembrane transport and integral to membrane localization                                                                                                                 | prot_ID_82   | AO090009000046     |
| n/a             |                |               |           | Domain(s) with predicted nucleotide binding, oxidoreductase activity and role in oxidation-reduction process                                                                                                   | prot_ID_1481 | AO090009000047     |
| n/a             |                |               |           | Domain(s) with predicted role in transmembrane transport and integral to membrane localization                                                                                                                 | prot_ID_1958 | AO090009000049     |
| n/a             |                |               |           | Ortholog of A. nidulans FGSC A4 : AN3479, AN8495, A. fumigatus Af293 : Afu3g01440, Afu4g03340, Afu5g07620, A. niger CBS 513.88 : An13g02880 and A. niger ATCC 1015 : 129924-mRNA                               | prot_ID_1626 | AO090009000050     |
| n/a             |                |               |           | Protein of unknown function                                                                                                                                                                                    | prot_ID_895  | AO090009000051 IGD |
| n/a             |                |               |           | Polyketide synthase                                                                                                                                                                                            | prot_ID_1792 | AO090009000052     |
| n/a             |                |               |           | Domain(s) with predicted solute:hydrogen antiporter activity, role in cation transport, transmembrane transport and integral to membrane localization                                                          | prot_ID_896  | AO090009000053     |
| n/a             |                |               |           | Ortholog of Aspergillus flavus NRRL 3357 : AFL2T_10595, A. versicolor : Aspve1_0078217 and A. sydowii : Aspsy1_0027985                                                                                         | prot_ID_1950 | AO090009000054     |
| n/a             |                |               |           | Similar to pleiotropic drug resistance proteins, ABC superfamily; upregulated by exposure to benomyl                                                                                                           | prot_ID_1301 | AO090009000055     |
| n/a             |                |               |           | Domain(s) with predicted sequence-specific DNA binding RNA polymerase II transcription factor activity, zinc ion binding activity, role in regulation of transcription, DNA-dependent and nucleus localization | prot_ID_2012 | AO090009000717 IGD |

## A090009000071 cluster

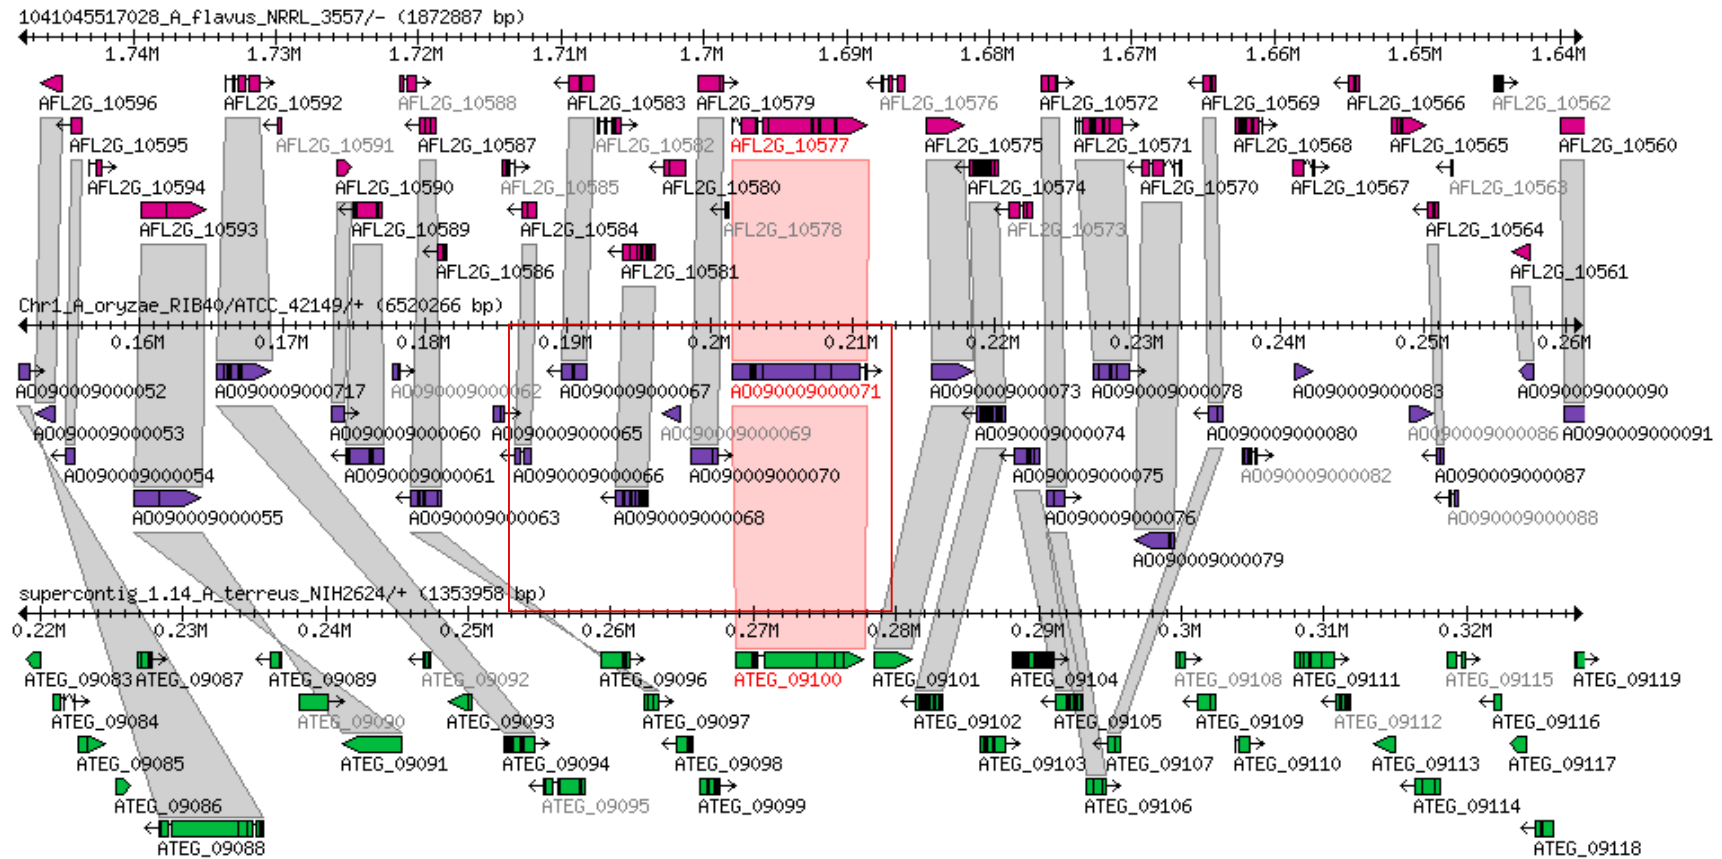

**AO090009000071 cluster**

| Gene id (SMURF)       | Gene positions | Gene distance | Gene Name | Annotated_gene_function                                                                                                                                                                                                           | antiSMASH ID | AspGD ID                |
|-----------------------|----------------|---------------|-----------|-----------------------------------------------------------------------------------------------------------------------------------------------------------------------------------------------------------------------------------|--------------|-------------------------|
| n/a                   |                |               |           | Domain(s) with predicted sequence-specific DNA binding RNA polymerase II transcription factor activity, zinc ion binding activity, role in regulation of transcription, DNA-dependent and nucleus localization                    | prot_ID_769  | AO090009000079          |
| n/a                   |                |               |           | Domain(s) with predicted oxidoreductase activity, transferase activity and role in biosynthetic process, oxidation-reduction process                                                                                              | prot_ID_1415 | AO090009000078          |
| n/a                   |                |               |           | Domain(s) with predicted oxidoreductase activity and role in oxidation-reduction process                                                                                                                                          | prot_ID_327  | AO090009000076          |
| n/a                   |                |               |           | Domain(s) with predicted N,N-dimethylaniline monooxygenase activity, NADP binding, flavin adenine dinucleotide binding activity, role in oxidation-reduction process and intrinsic to endoplasmic reticulum membrane localization | prot_ID_1265 | AO090009000075          |
| n/a                   |                |               |           | Domain(s) with predicted role in transmembrane transport and integral to membrane localization                                                                                                                                    | prot_ID_112  | AO090009000074          |
| n/a                   |                |               |           | Domain(s) with predicted RNA binding, RNA-directed DNA polymerase activity and role in RNA-dependent DNA replication                                                                                                              | prot_ID_987  | AO090009000073          |
| <b>AO090009000071</b> | 0              | 0             |           | <b>Polyketide synthase</b><br>Ortholog of <i>A. nidulans</i> FGSC A4 : AN5608, AN4473, <i>A. fumigatus</i> Af293 : Afu4g07720, <i>A. niger</i> CBS 513.88 : An14g07030, An04g02100 and <i>A. oryzae</i> RIB40 : AO090023000800    | prot_ID_1572 | AO090009000071 ECS, IGD |
| AO090009000070        | 1              | 1233          |           |                                                                                                                                                                                                                                   | prot_ID_432  | AO090009000070          |
| AO090009000069        | 2              | 832           |           | Protein of unknown function                                                                                                                                                                                                       | prot_ID_995  | AO090009000069          |
| AO090009000068        | 3              | 1070          |           | Domain(s) with predicted role in transmembrane transport and integral to membrane localization                                                                                                                                    | prot_ID_447  | AO090009000068          |
| n/a                   |                |               |           | Ortholog(s) have hydroquinone:oxygen oxidoreductase activity and role in melanin biosynthetic process, pigment metabolic process involved in developmental pigmentation                                                           | prot_ID_663  | AO090009000067          |
| n/a                   |                |               |           | Ortholog of <i>A. flavus</i> NRRL 3357 : AFL2T_10584, <i>A. clavatus</i> NRRL 1 : ACLA_064070, <i>A. versicolor</i> : Aspve1_0047683 and <i>A. sydowii</i> : Aspsy1_0188643                                                       | prot_ID_222  | AO090009000066 ECS      |
| n/a                   |                |               |           | Domain(s) with predicted aldehyde-lyase activity, zinc ion binding activity and role in carbohydrate metabolic process                                                                                                            | prot_ID_1330 | AO090009000065          |

# AO090009000131 cluster

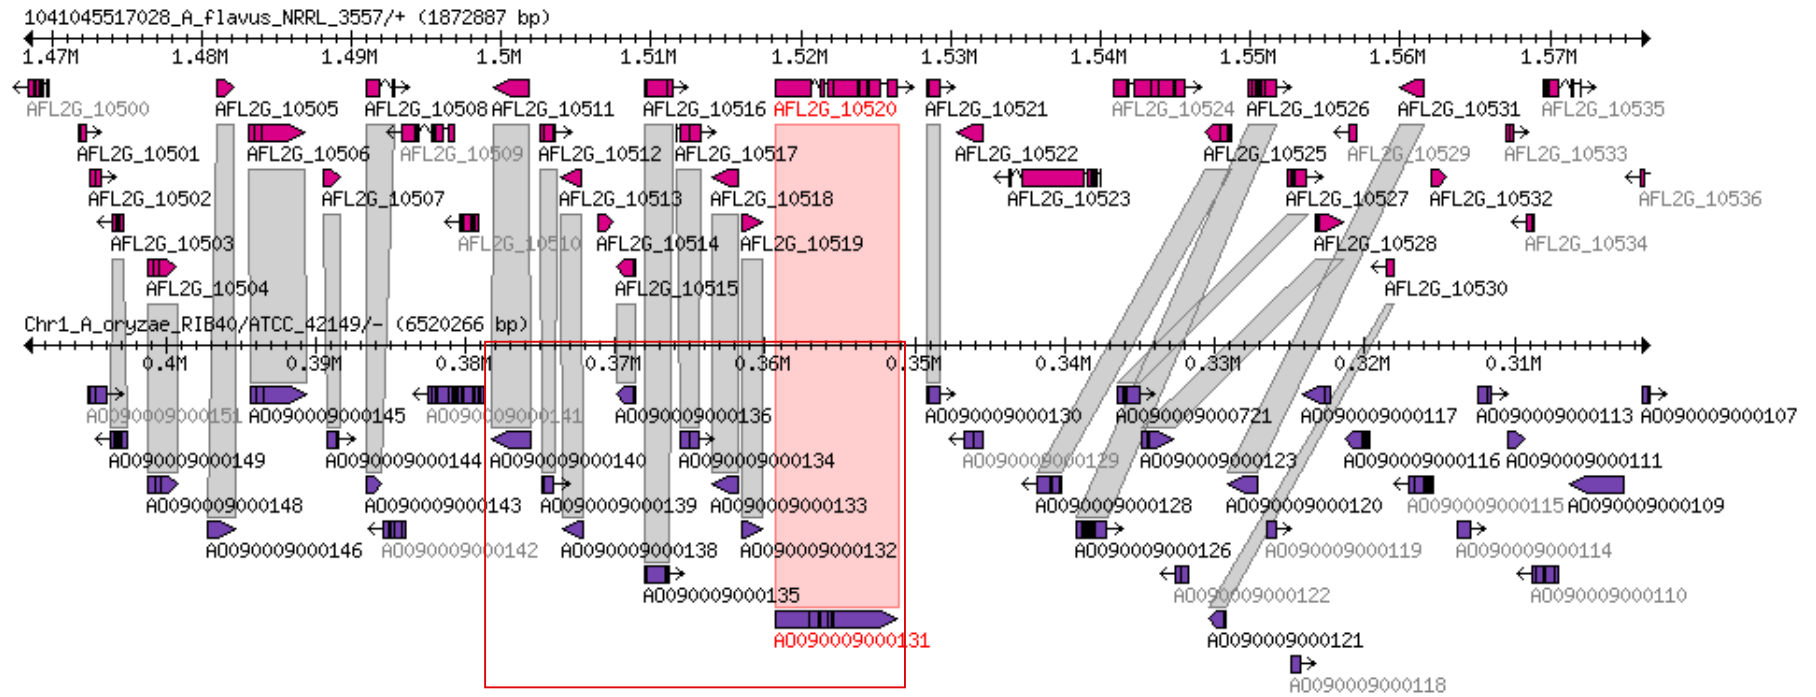

**AO090009000131 cluster**

| Gene id (SMURF)       | Gene positions | Gene distance | Gene Name | Annotated_gene_function                                                                                                                                                                                                                                                                                                                                                                                                                      | antiSMASH ID | AspGD ID           |
|-----------------------|----------------|---------------|-----------|----------------------------------------------------------------------------------------------------------------------------------------------------------------------------------------------------------------------------------------------------------------------------------------------------------------------------------------------------------------------------------------------------------------------------------------------|--------------|--------------------|
| AO090009000143        | -11            | 130           |           | Domain(s) with predicted hydrolase activity                                                                                                                                                                                                                                                                                                                                                                                                  | n/a          | AO090009000143     |
| AO090009000142        | -10            | 1483          |           | Protein of unknown function                                                                                                                                                                                                                                                                                                                                                                                                                  | n/a          | AO090009000142     |
| AO090009000141        | -9             | 692           |           | Domain(s) with predicted metal ion binding activity, role in transmembrane transport and integral to membrane localization                                                                                                                                                                                                                                                                                                                   | prot_ID_1860 | AO090009000141     |
| AO090009000140        | -8             | 776           |           | Domain(s) with predicted hydroxymethyl-, formyl- and related transferase activity and role in biosynthetic process                                                                                                                                                                                                                                                                                                                           | prot_ID_556  | AO090009000140 FA  |
| AO090009000139        | -7             | 490           |           | Domain(s) with predicted methylenetetrahydrofolate dehydrogenase (NADP+) activity, nucleotide binding activity and role in folic acid-containing compound biosynthetic process, oxidation-reduction process                                                                                                                                                                                                                                  | prot_ID_55   | AO090009000139     |
| AO090009000138        | -6             | 2450          |           | Domain(s) with predicted role in transmembrane transport and integral to membrane localization                                                                                                                                                                                                                                                                                                                                               | prot_ID_1841 | AO090009000138     |
| AO090009000136        | -5             | 640           |           | Homoserine dehydrogenase                                                                                                                                                                                                                                                                                                                                                                                                                     | prot_ID_568  | AO090009000136     |
| AO090009000135        | -4             | 748           |           | Domain(s) with predicted oxidoreductase activity, acting on the aldehyde or oxo group of donors, NAD or NADP as acceptor activity and role in oxidation-reduction process                                                                                                                                                                                                                                                                    | prot_ID_1740 | AO090009000135     |
| AO090009000134        | -3             | 787           |           | Ortholog of <i>A. flavus</i> NRRL 3357 : AFL2T_10517                                                                                                                                                                                                                                                                                                                                                                                         | prot_ID_1295 | AO090009000134     |
| AO090009000133        | -2             | 358           |           | Domain(s) with predicted sequence-specific DNA binding RNA polymerase II transcription factor activity, zinc ion binding activity, role in regulation of transcription, DNA-dependent and nucleus localization<br>Ortholog of <i>A. fumigatus</i> Af293 : Afu8g00530, <i>A. niger</i> CBS 513.88 : An07g00020, An13g03240, <i>A. oryzae</i> RIB40 : AO090026000248, AO090102000460 and <i>A. versicolor</i> : Aspve1_0038561, Aspve1_0043401 | prot_ID_472  | AO090009000133     |
| AO090009000132        | -1             | 854           |           | Polyketide synthase                                                                                                                                                                                                                                                                                                                                                                                                                          | prot_ID_232  | AO090009000132     |
| <b>AO090009000131</b> | 0              | 0             |           | Ortholog of <i>A. flavus</i> NRRL 3357 : AFL2T_10521                                                                                                                                                                                                                                                                                                                                                                                         | prot_ID_1834 | AO090009000131 ECS |
| n/a                   |                |               |           | Protein of unknown function                                                                                                                                                                                                                                                                                                                                                                                                                  | prot_ID_755  | AO090009000130     |
| n/a                   |                |               | CYP65AC2  | Cytochrome P450 monooxygenase                                                                                                                                                                                                                                                                                                                                                                                                                | prot_ID_1867 | AO090009000129     |
| n/a                   |                |               |           | Domain(s) with predicted role in transmembrane transport and integral to membrane localization                                                                                                                                                                                                                                                                                                                                               | prot_ID_914  | AO090009000128     |
| n/a                   |                |               |           | Ortholog of <i>A. nidulans</i> FGSC A4 : AN6413, AN8328, AN3395, AN3241, AN10369, AN1930, AN2386, AN1738, AN9266, AN10886, AN7232, AN7406, AN7774, AN12202                                                                                                                                                                                                                                                                                   | prot_ID_1254 | AO090009000126     |
| n/a                   |                |               |           | Domain(s) with predicted catalytic activity, magnesium ion binding, thiamine pyrophosphate binding activity                                                                                                                                                                                                                                                                                                                                  | prot_ID_1993 | AO090009000125.1   |
| n/a                   |                |               |           | Domain(s) with predicted N-acetyltransferase activity and role in metabolic process                                                                                                                                                                                                                                                                                                                                                          | prot_ID_167  | AO090009000123     |
| n/a                   |                |               |           |                                                                                                                                                                                                                                                                                                                                                                                                                                              | prot_ID_1863 | AO090009000122     |

## A009001000048 (aoi) cluster

Experimentally determined cluster

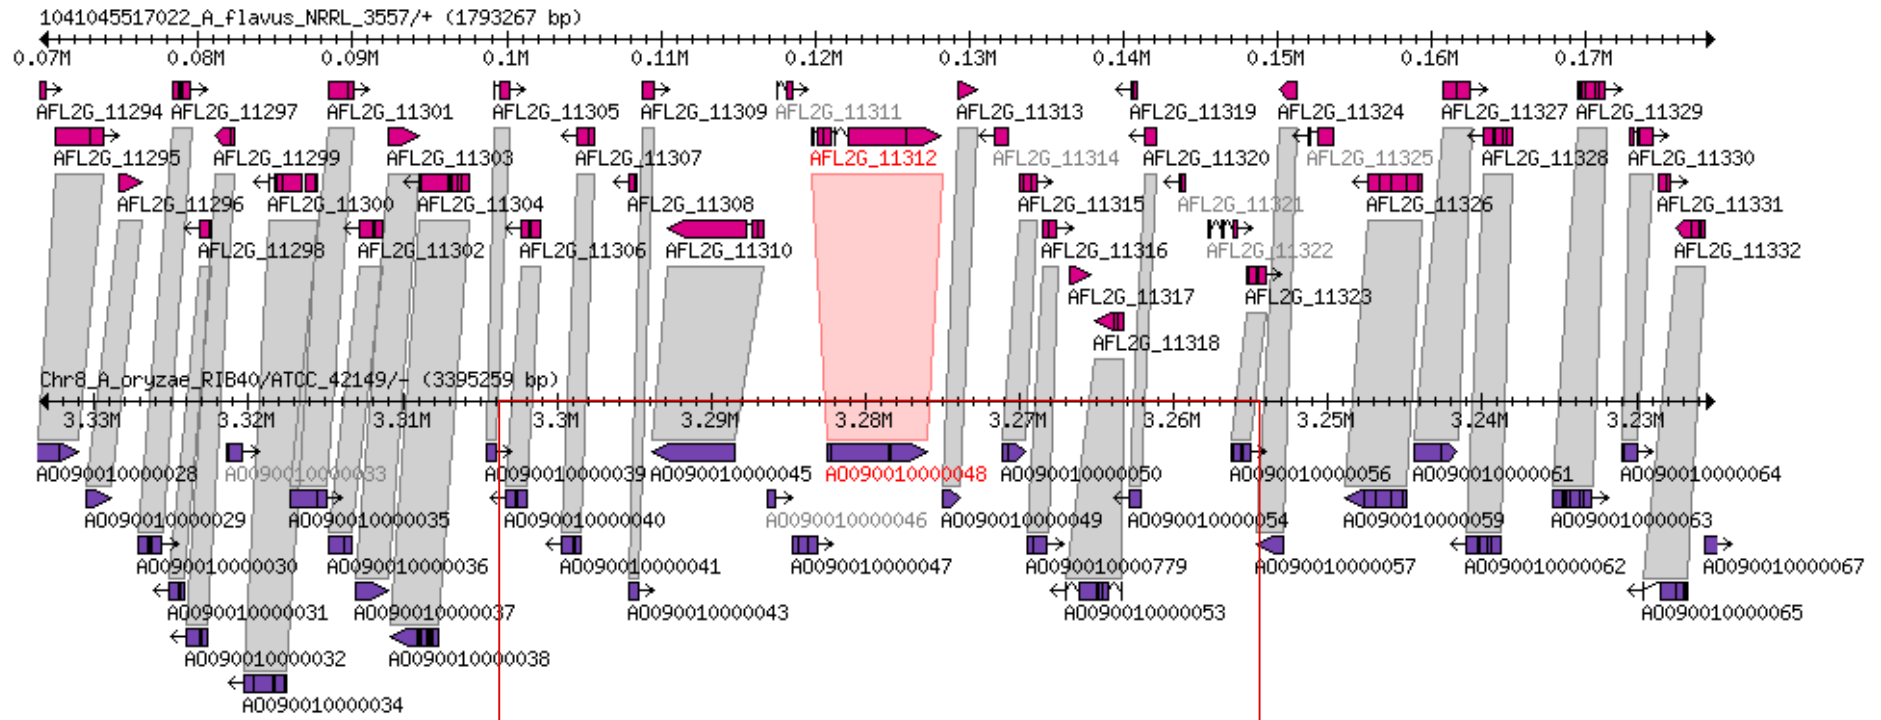

**AO090010000048 (aoi) cluster**

| Gene id (SMURF)       | Gene positions | Gene distance | Gene Name | Annotated_gene_function                                                                                                                                                                                                             | antiSMASH ID | AspGD ID          |
|-----------------------|----------------|---------------|-----------|-------------------------------------------------------------------------------------------------------------------------------------------------------------------------------------------------------------------------------------|--------------|-------------------|
| AO090010000035        | -11            | 289           |           | Domain(s) with predicted substrate-specific transmembrane transporter activity, role in transmembrane transport and integral to membrane localization                                                                               | n/a          | AO090010000035    |
| AO090010000036        | -10            | 362           |           | Domain(s) with predicted role in transmembrane transport and integral to membrane localization                                                                                                                                      | n/a          | AO090010000036    |
| AO090010000037        | -9             | 117           |           | Domain(s) with predicted DNA binding, sequence-specific DNA binding RNA polymerase II transcription factor activity, zinc ion binding activity and role in regulation of transcription, DNA-dependent, transcription, DNA-dependent | n/a          | AO090010000037    |
| AO090010000038        | -8             | 3107          |           | Ortholog of A. flavus NRRL 3357 : AFL2T_11304, A. versicolor : Aspve1_0774606 and A. sydowii : Aspsy1_0057550                                                                                                                       | n/a          | AO090010000038    |
| AO090010000039        | -7             | 640           |           | Ortholog of A. flavus NRRL 3357 : AFL2T_11305                                                                                                                                                                                       | n/a          | AO090010000039    |
| AO090010000040        | -6             | 2303          | aoiA      | Member of the aoi gene cluster responsible for polyketide biosynthesis in A. oryzae var. brunneus                                                                                                                                   | prot_ID_40   | AO090010000040 ED |
| AO090010000041        | -5             | 3104          | aoiB      | Putative alcohol dehydrogenase; member of the aoi gene cluster responsible for polyketide biosynthesis in A. oryzae var. brunneus                                                                                                   | prot_ID_650  | AO090010000041    |
| AO090010000043        | -4             | 786           | aoiC      | Member of the aoi gene cluster responsible for polyketide biosynthesis in A. oryzae var. brunneus                                                                                                                                   | prot_ID_334  | AO090010000043    |
| AO090010000045        | -3             | 2171          | aoiD      | Member of the aoi gene cluster responsible for polyketide biosynthesis in A. oryzae var. brunneus                                                                                                                                   | prot_ID_748  | AO090010000045    |
| AO090010000046        | -2             | 1125          | aoiE      | Member of the aoi gene cluster responsible for polyketide biosynthesis in A. oryzae var. brunneus                                                                                                                                   | prot_ID_743  | AO090010000046    |
| AO090010000047        | -1             | 739           | aoiF      | Putative O-methyltransferase; member of the aoi gene cluster responsible for polyketide biosynthesis in A. oryzae var. brunneus                                                                                                     | prot_ID_27   | AO090010000047    |
| <b>AO090010000048</b> | 0              | 0             | aoiG      | Putative iterative polyketide synthase with seven domains; member of the aoi gene cluster responsible for polyketide biosynthesis in A. oryzae var. brunneus                                                                        | prot_ID_641  | AO090010000048    |
| AO090010000049        | 1              | 1014          | aoiH      | Putative Zn2Cys6 binuclear cluster DNA-binding protein similar to AfIR; regulatory member of the aoi gene cluster responsible for polyketide biosynthesis in A. oryzae var. brunneus                                                | prot_ID_453  | AO090010000049    |
| AO090010000050        | 2              | 2846          | aoiJ      | Member of the aoi gene cluster responsible for polyketide biosynthesis in A. oryzae var. brunneus                                                                                                                                   | prot_ID_259  | AO090010000050    |
| AO090010000779        | 3              | 424           | aoiL      | Putative arylamine N-acetyltransferase 2; member of the aoi gene cluster responsible for polyketide biosynthesis in A. oryzae var. brunneus                                                                                         | prot_ID_1083 | AO090010000779    |
| AO090010000053        | 4              | 1421          | aoiM      | Predicted dihydroxy-acid dehydratase; member of the aoi gene cluster responsible for polyketide biosynthesis in A. oryzae var. brunneus                                                                                             | prot_ID_760  | AO090010000053    |



|                |   |     |      |                                                                                                                                                           |             |                   |
|----------------|---|-----|------|-----------------------------------------------------------------------------------------------------------------------------------------------------------|-------------|-------------------|
| AO090010000054 | 5 | 433 | aoiN | Predicted short chain type dehydrogenase; member of the aoi gene cluster responsible for polyketide biosynthesis in <i>A. oryzae</i> var. <i>brunneus</i> | prot_ID_242 | AO090010000054    |
| n/a            |   |     | aoiO | Predicted O-methyltransferase; member of the aoi gene cluster responsible for polyketide biosynthesis in <i>A. oryzae</i> var. <i>brunneus</i>            | prot_ID_672 | AO090010000056 ED |

## AO09001000082 cluster

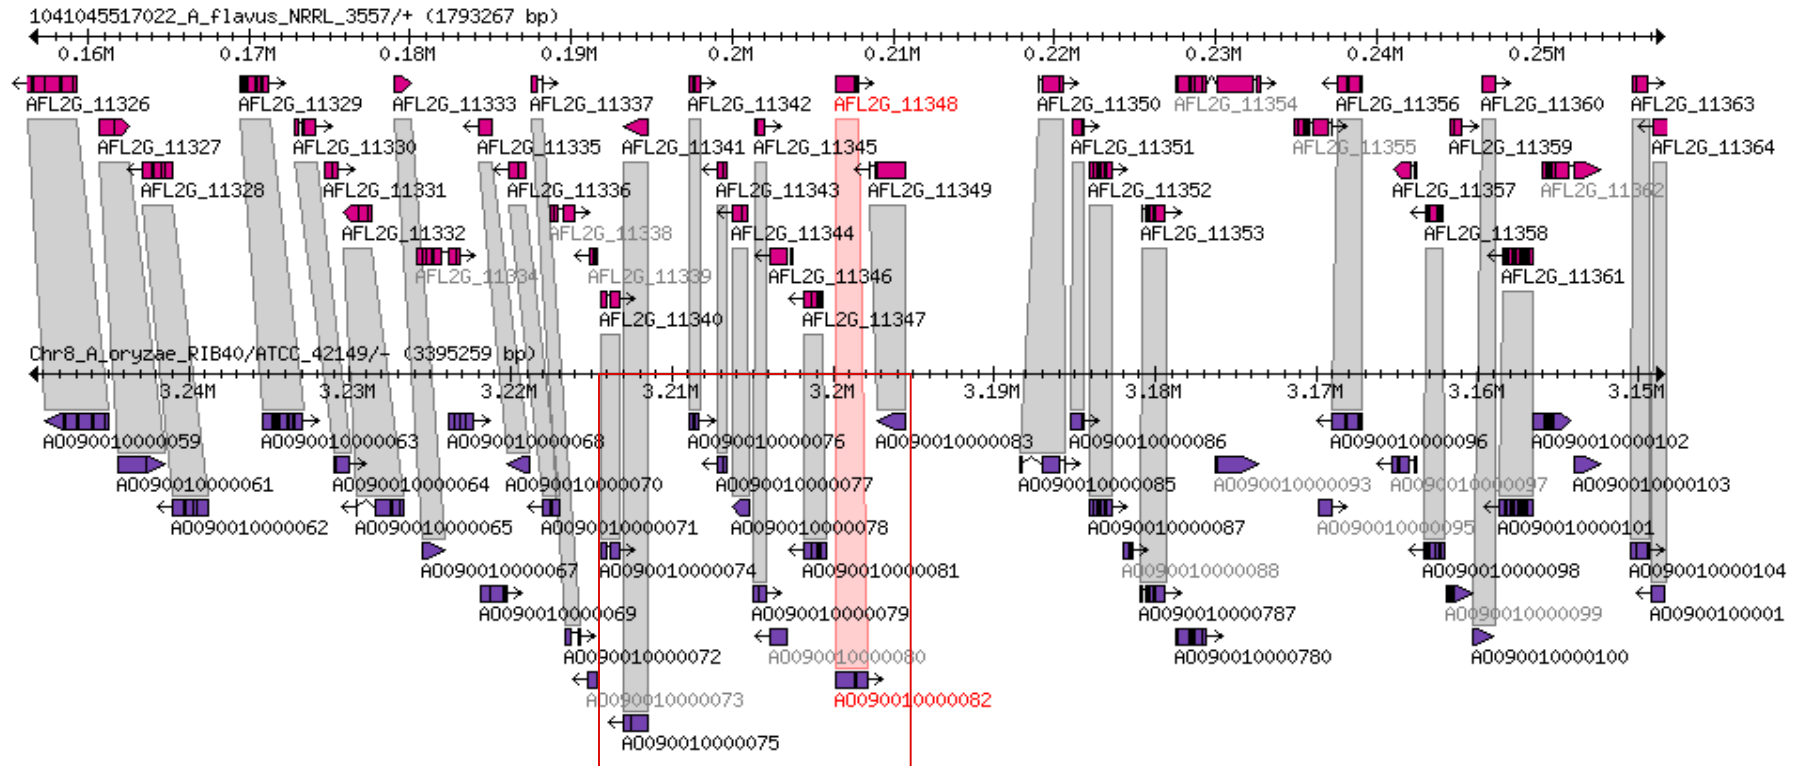

**AO09001000082 cluster**

| Gene id (SMURF)       | Gene positions | Gene distance | Gene Name | Annotated_gene_function                                                                                                                                                                                                             | antiSMASH ID | AspGD ID       |     |
|-----------------------|----------------|---------------|-----------|-------------------------------------------------------------------------------------------------------------------------------------------------------------------------------------------------------------------------------------|--------------|----------------|-----|
| AO090010000070        | -12            | 1042          |           | Domain(s) with predicted hydrolase activity                                                                                                                                                                                         |              | AO090010000070 |     |
| AO090010000071        | -11            | 365           |           | Domain(s) with predicted catalytic activity, coenzyme binding, nucleotide binding activity and role in cellular metabolic process                                                                                                   | n/a          | AO090010000071 |     |
| AO090010000072        | -10            | 634           |           | Ortholog of A. flavus NRRL 3357 : AFL2T_11337                                                                                                                                                                                       | n/a          | AO090010000072 |     |
| AO090010000073        | -9             | 305           |           |                                                                                                                                                                                                                                     | n/a          | AO090010000073 |     |
|                       |                |               |           | Domain(s) with predicted oxidoreductase activity, acting on paired donors, with incorporation or reduction of molecular oxygen, 2-oxoglutarate as one donor, and incorporation of one atom each of oxygen into both donors activity |              |                |     |
| AO090010000074        | -8             | 184           |           |                                                                                                                                                                                                                                     | n/a          | AO090010000074 | ECS |
| AO090010000075        | -7             | 2515          |           | Cytochrome P450 monooxygenase                                                                                                                                                                                                       | n/a          | AO090010000075 |     |
| AO090010000076        | -6             | 1025          |           | Domain(s) with predicted RNA binding, ribonuclease activity                                                                                                                                                                         | n/a          | AO090010000076 |     |
|                       |                |               |           | Domain(s) with predicted lysozyme activity and role in cell wall macromolecule catabolic process, peptidoglycan catabolic process                                                                                                   |              |                |     |
| AO090010000077        | -5             | 408           |           |                                                                                                                                                                                                                                     | n/a          | AO090010000077 |     |
| AO090010000078        | -4             | 404           |           | Domain(s) with predicted nucleotide binding activity                                                                                                                                                                                | n/a          | AO090010000078 |     |
|                       |                |               |           | Domain(s) with predicted carbon-sulfur lyase activity and role in metabolic process                                                                                                                                                 |              |                |     |
| AO090010000079        | -3             | 402           |           |                                                                                                                                                                                                                                     | n/a          | AO090010000079 |     |
| AO090010000080        | -2             | 1070          |           | Domain(s) with predicted nucleotide binding activity                                                                                                                                                                                | n/a          | AO090010000080 |     |
|                       |                |               |           | Ortholog of A. nidulans FGSC A4 : AN6809, A. fumigatus Af293 : Afu5g00680, A. niger CBS 513.88 : An16g00250, A. niger ATCC 1015 : 210803-mRNA and A. terreus NIH2624 : ATET_09248                                                   |              |                |     |
| AO090010000081        | -1             | 723           |           |                                                                                                                                                                                                                                     | n/a          | AO090010000081 |     |
|                       |                |               |           | Domain(s) with predicted tryptophan dimethylallyltransferase activity and role in alkaloid metabolic process                                                                                                                        |              |                |     |
| <b>AO090010000082</b> | 0              | 0             |           |                                                                                                                                                                                                                                     | n/a          | AO090010000082 |     |
| n/a                   |                |               |           | Ortholog of A. flavus NRRL 3357 : AFL2T_11349                                                                                                                                                                                       | n/a          | AO090010000083 | ECS |

## AO090010000114 cluster

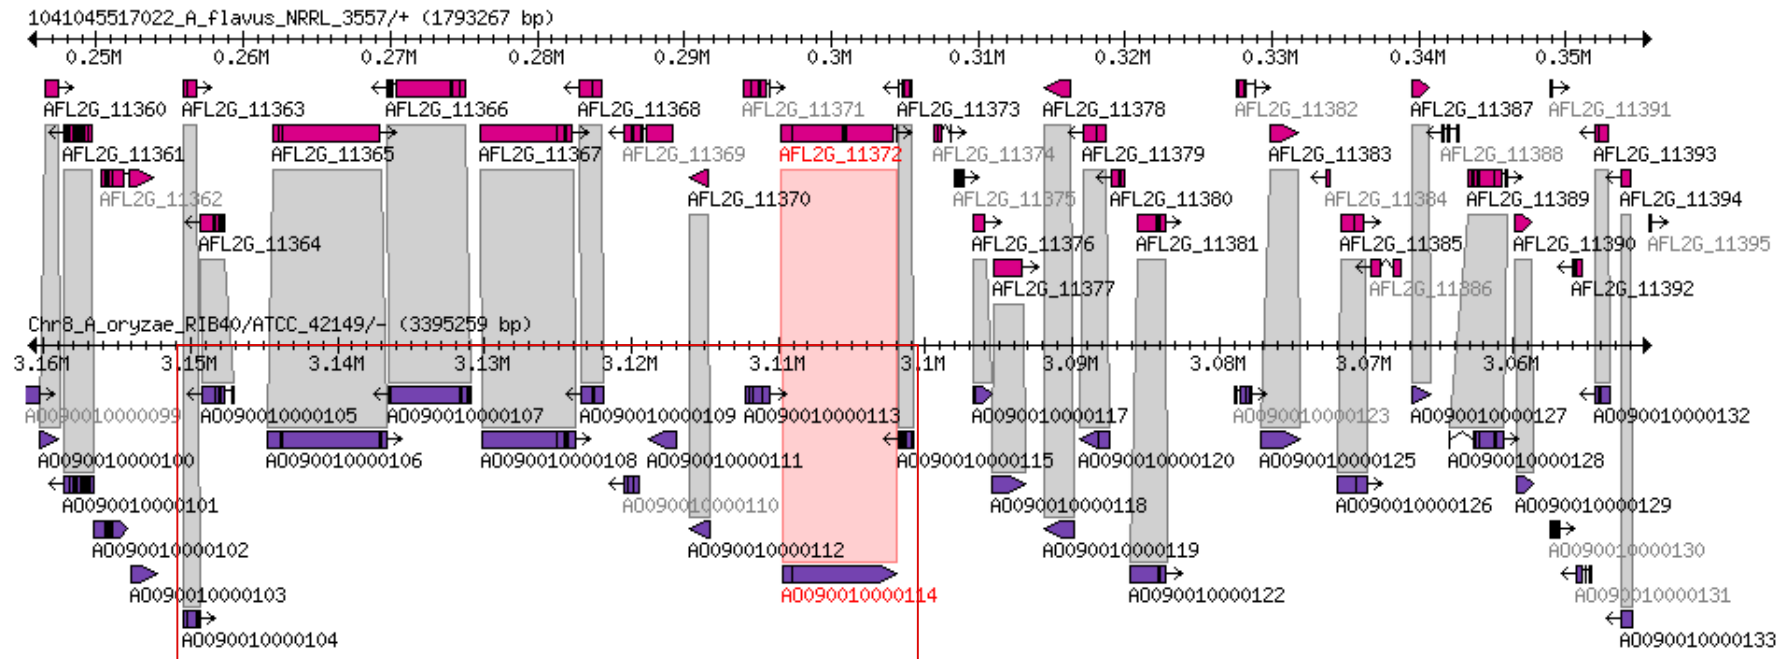

**AO090010000114 cluster**

| Gene id (SMURF) | Gene positions | Gene distance | Gene Name | Annotated_gene_function                                                                                                                                                                                        | antiSMASH ID | AspGD ID       |     |
|-----------------|----------------|---------------|-----------|----------------------------------------------------------------------------------------------------------------------------------------------------------------------------------------------------------------|--------------|----------------|-----|
| AO090010000097  | -17            | 585           |           | Domain(s) with predicted sequence-specific DNA binding RNA polymerase II transcription factor activity, zinc ion binding activity, role in regulation of transcription, DNA-dependent and nucleus localization | n/a          | AO090010000097 |     |
| AO090010000098  | -16            | 217           |           | Domain(s) with predicted nucleotide binding, oxidoreductase activity and role in oxidation-reduction process                                                                                                   | n/a          | AO090010000098 |     |
| AO090010000099  | -15            | 1219          |           |                                                                                                                                                                                                                | n/a          | AO090010000099 |     |
| AO090010000100  | -14            | 279           |           | Domain(s) with predicted aspartic-type endopeptidase activity and role in proteolysis                                                                                                                          | n/a          | AO090010000100 |     |
| AO090010000101  | -13            | 487           |           | Domain(s) with predicted role in transmembrane transport and integral to membrane localization                                                                                                                 | n/a          | AO090010000101 |     |
| AO090010000102  | -12            | 221           |           | Ortholog of A. nidulans FGSC A4 : AN8900, A. fumigatus Af293 : Afu7g01180, A. niger CBS 513.88 : An09g02270, A. niger ATCC 1015 : 189135-mRNA and A. versicolor : Aspve1_0143716                               | n/a          | AO090010000102 |     |
| AO090010000103  | -11            | 2408          |           | Ortholog(s) have homocysteine S-methyltransferase activity, role in sulfur amino acid metabolic process and cytoplasm localization                                                                             | n/a          | AO090010000103 |     |
| AO090010000104  | -10            | 89            |           | Ortholog of A. nidulans FGSC A4 : AN3379, A. fumigatus Af293 : Afu7g01170, A. niger CBS 513.88 : An12g01970, An01g00420, A. oryzae RIB40 : AO090038000140 and A. niger ATCC 1015 : 50335-mRNA                  | n/a          | AO090010000104 | ECS |
| AO090010000105  | -9             | 2730          |           | Domain(s) with predicted role in transmembrane transport and integral to membrane localization                                                                                                                 | n/a          | AO090010000105 |     |
| AO090010000106  | -8             | 392           |           | Ortholog(s) have role in cellular response to drug, growth of symbiont in host, melanin metabolic process, spore germination                                                                                   | n/a          | AO090010000106 |     |
| AO090010000107  | -7             | 744           |           | Ortholog(s) have role in secondary metabolic process                                                                                                                                                           | n/a          | AO090010000107 |     |
| AO090010000108  | -6             | 393           |           | Ortholog(s) have role in fatty acid biosynthetic process, secondary metabolic process                                                                                                                          | prot_ID_1019 | AO090010000108 |     |
| AO090010000109  | -5             | 1460          |           | Ortholog(s) have role in asperfuranone biosynthetic process, pigment biosynthetic process, sexual sporulation resulting in formation of a cellular spore                                                       | prot_ID_419  | AO090010000109 |     |
| AO090010000110  | -4             | 630           |           |                                                                                                                                                                                                                | prot_ID_872  | AO090010000110 |     |
| AO090010000111  | -3             | 979           |           | Ortholog of A. fumigatus Af293 : Afu2g09410, N. fischeri NRRL 181 : NFIA_084910, A. clavatus NRRL 1 : ACLA_081200, A. sydowii : Aspsy1_0160093 and A. fumigatus A1163 : AFUB_025270                            | prot_ID_410  | AO090010000111 |     |
| AO090010000112  | -2             | 2418          |           | Domain(s) with predicted transferase activity, transferring acyl groups other than amino-acyl groups activity                                                                                                  | prot_ID_755  | AO090010000112 |     |
| AO090010000113  | -1             | 693           |           | Ortholog(s) have role in positive regulation of secondary metabolite biosynthetic process, secondary metabolite biosynthetic process                                                                           | prot_ID_286  | AO090010000113 |     |

|                       |   |      |                                                                                                                                                                                                                         |             |                    |
|-----------------------|---|------|-------------------------------------------------------------------------------------------------------------------------------------------------------------------------------------------------------------------------|-------------|--------------------|
| <b>AO090010000114</b> | 0 | 0    | <b>Polyketide synthase</b>                                                                                                                                                                                              | prot_ID_769 | AO090010000114     |
| n/a                   |   |      | Ortholog of <i>A. nidulans</i> FGSC A4 : AN9052, <i>A. oryzae</i> RIB40 : AO090003000760, <i>A.s flavus</i> NRRL 3357 : AFL2T_07295, AFL2T_11373 and <i>A. clavatus</i> NRRL 1 : ACLA_075980                            | prot_ID_281 | AO090010000115 ECS |
| n/a                   |   |      | Domain(s) with predicted nucleotide binding, oxidoreductase activity and role in oxidation-reduction process                                                                                                            | prot_ID_434 | AO090010000117     |
| n/a                   |   |      | Ortholog of <i>A. nidulans</i> FGSC A4 : AN3405, <i>A. niger</i> CBS 513.88 : An12g02110, <i>A. niger</i> ATCC 1015 : 43750-mRNA, <i>A. versicolor</i> : Aspve1_0592672 and <i>A. sydowii</i> : Aspsy1_0830408          | prot_ID_522 | AO090010000118     |
| n/a                   |   |      | Ortholog(s) have L-proline transmembrane transporter activity and role in gamma-aminobutyric acid transport, proline transport                                                                                          | prot_ID_39  | AO090010000119     |
| n/a                   |   |      | Ortholog of <i>A. nidulans</i> FGSC A4 : AN10327, <i>A. niger</i> CBS 513.88 : An05g01350, <i>A. brasiliensis</i> : Aspbr1_0033982, <i>A. niger</i> ATCC 1015 : 39005-mRNA and <i>A. flavus</i> NRRL 3357 : AFL2T_11379 | prot_ID_120 | AO090010000120     |
| n/a                   |   | manG | Mannan endo-1,4-beta-mannosidase; transcriptionally regulated by ManR                                                                                                                                                   | prot_ID_367 | AO090010000122     |

# AO9001000204 cluster

No PKS or NRPS backbone

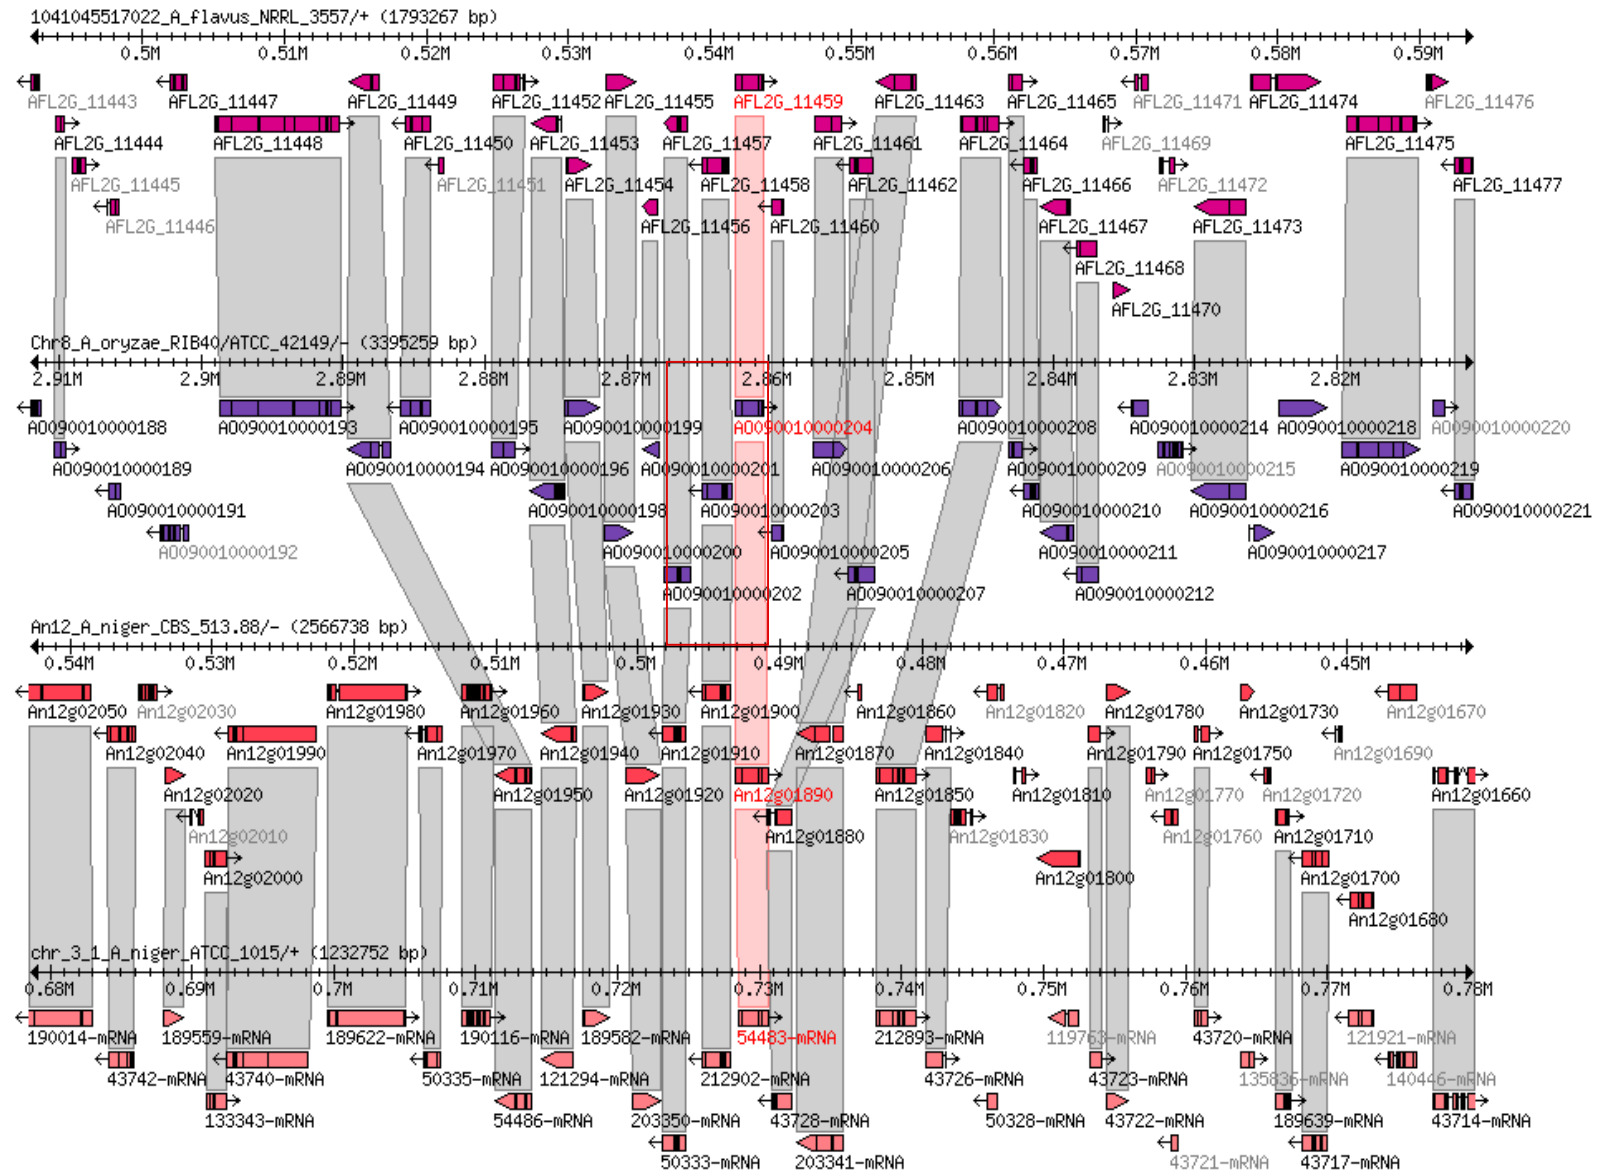

**AO090010000204 cluster**

| Gene id (SMURF) | Gene positions | Gene distance | Gene Name | Annotated_gene_function                                                                                                                                                                                                            | antiSMASH ID | AspGD ID           |
|-----------------|----------------|---------------|-----------|------------------------------------------------------------------------------------------------------------------------------------------------------------------------------------------------------------------------------------|--------------|--------------------|
| n/a             |                |               |           | Ortholog of A. nidulans FGSC A4 : AN3374, A. fumigatus Af293 : Afu7g01260, A. niger CBS 513.88 : An12g01920, A. niger ATCC 1015 : 203350-mRNA and A. versicolor : Aspve1_0127125                                                   | prot_ID_283  | AO090010000200     |
| n/a             |                |               |           | Ortholog of A. flavus NRRL 3357 : AFL2T_11456                                                                                                                                                                                      | prot_ID_621  | AO090010000201     |
| n/a             |                |               |           | Domain(s) with predicted acid phosphatase activity                                                                                                                                                                                 | prot_ID_476  | AO090010000202 ECS |
| n/a             |                |               |           | Domain(s) with predicted heat shock protein binding, unfolded protein binding activity and role in protein folding                                                                                                                 | prot_ID_795  | AO090010000203     |
| n/a             |                |               |           | Ortholog(s) have farnesyl-diphosphate farnesyltransferase activity, squalene synthase activity, role in ergosterol biosynthetic process and endoplasmic reticulum, integral to membrane, mitochondrial outer membrane localization | prot_ID_56   | AO090010000204 ECS |
| n/a             |                |               |           | Domain(s) with predicted ubiquitin thiolesterase activity, role in ubiquitin-dependent protein catabolic process and intracellular localization                                                                                    | prot_ID_530  | AO090010000205     |
| n/a             |                |               |           | Domain(s) with predicted solute:hydrogen antiporter activity, role in cation transport, transmembrane transport and integral to membrane                                                                                           | prot_ID_578  | AO090010000206     |
| n/a             |                |               |           | Ortholog(s) have role in GPI anchor biosynthetic process, fungal-type cell wall organization; reported to overlap the 3' end of the manR transcription factor which has not been identified in AspGD                               | prot_ID_347  | AO090010000207     |



# A0090010000349 cluster

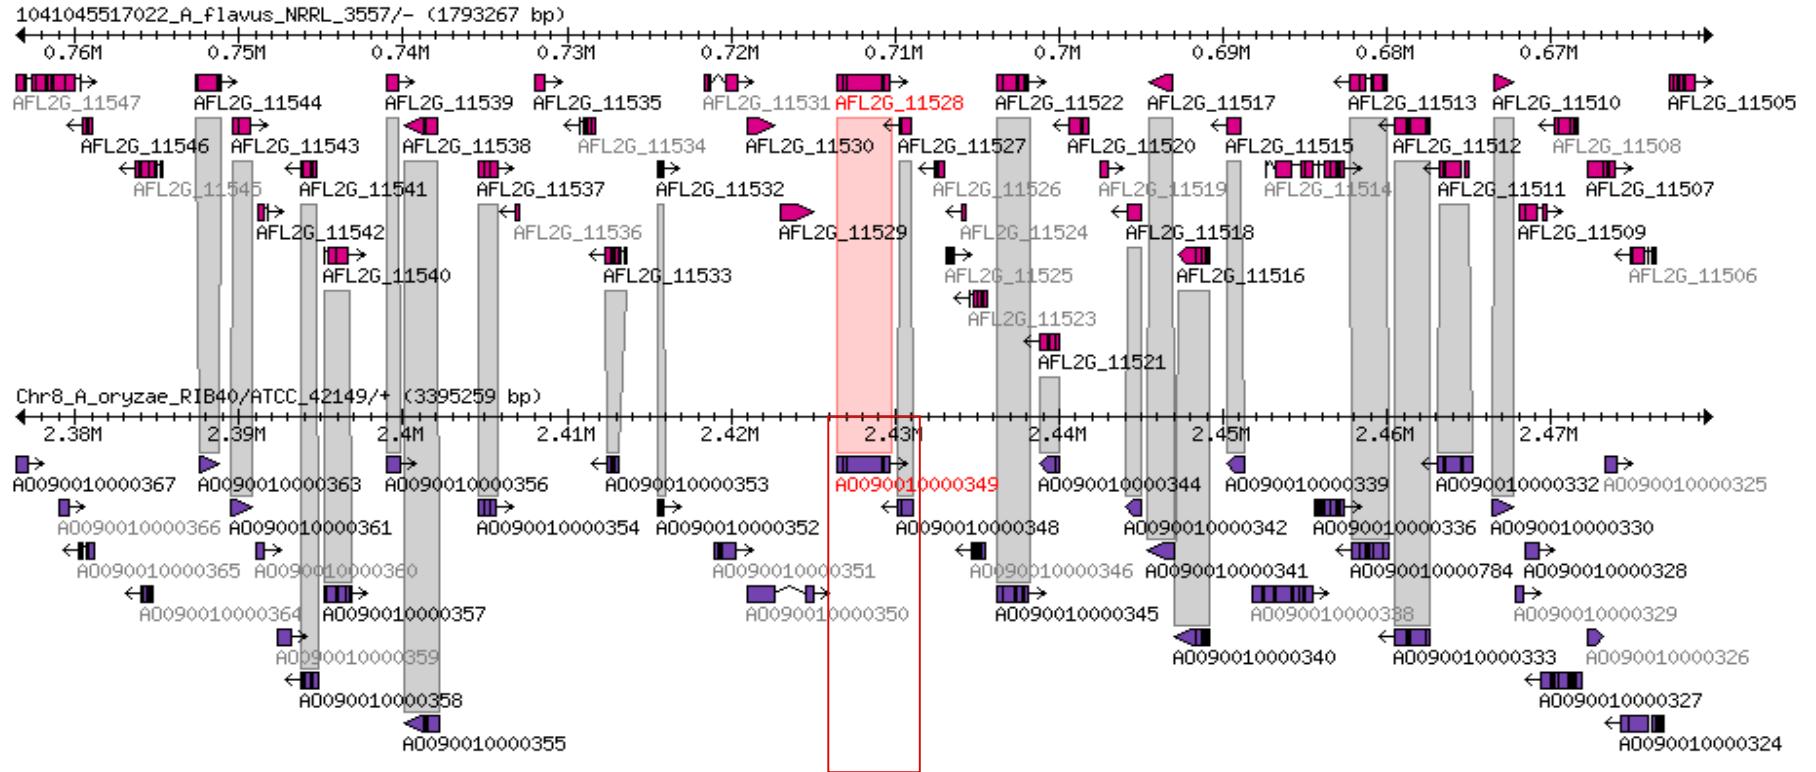

**AO090010000349 cluster**

| Gene id (SMURF)       | Gene positions | Gene distance | Gene Name | Annotated_gene_function                                                                                                                                                                                                                                                                  | antiSMASH ID | AspGD ID           |
|-----------------------|----------------|---------------|-----------|------------------------------------------------------------------------------------------------------------------------------------------------------------------------------------------------------------------------------------------------------------------------------------------|--------------|--------------------|
| n/a                   |                |               |           | Domain(s) with predicted oxidoreductase activity and role in oxidation-reduction process                                                                                                                                                                                                 | prot_ID_758  | AO090010000340     |
| n/a                   |                |               |           | Domain(s) with predicted carboxy-lyase activity, pyridoxal phosphate binding activity and role in cellular amino acid metabolic process                                                                                                                                                  | prot_ID_163  | AO090010000341     |
| n/a                   |                |               |           | Domain(s) with predicted nucleotide binding activity                                                                                                                                                                                                                                     | prot_ID_269  | AO090010000342     |
| n/a                   |                |               |           | Ortholog of A. brasiliensis : Aspbr1_0148047, A. flavus NRRL 3357 : AFL2T_11521, A. niger ATCC 1015 : 124966-mRNA and A. carbonarius ITEM 5010 : Acar5010_010980                                                                                                                         | prot_ID_455  | AO090010000344     |
| n/a                   |                |               |           | Domain(s) with predicted nucleobase transmembrane transporter activity, role in nucleobase transport and membrane localization                                                                                                                                                           | prot_ID_916  | AO090010000345     |
| n/a                   |                |               |           | Protein of unknown function                                                                                                                                                                                                                                                              | prot_ID_21   | AO090010000346     |
| n/a                   |                |               |           | Ortholog of Aspergillus flavus NRRL 3357 : AFL2T_11527<br>Domain(s) with predicted ACP phosphopantetheine attachment site binding involved in fatty acid biosynthetic process, catalytic activity, nucleotide binding, phosphopantetheine binding activity and role in metabolic process | prot_ID_155  | AO090010000348 ECS |
| <b>AO090010000349</b> | 0              | 0             |           |                                                                                                                                                                                                                                                                                          | prot_ID_645  | AO090010000349 ECS |
| AO090010000350        | 1              | 1444          |           | Domain(s) with predicted role in cell adhesion, transmembrane transport and integral to membrane localization                                                                                                                                                                            | prot_ID_456  | AO090010000350     |
| n/a                   |                |               |           | Domain(s) with predicted amino acid transmembrane transporter activity, role in amino acid transmembrane transport and membrane localization                                                                                                                                             | prot_ID_903  | AO090010000351     |
| n/a                   |                |               |           | Ortholog of A. flavus NRRL 3357 : AFL2T_11532                                                                                                                                                                                                                                            | prot_ID_55   | AO090010000352     |
| n/a                   |                |               |           | Domain(s) with predicted hydrolase activity, acting on carbon-nitrogen (but not peptide) bonds, in linear amides activity, role in ceramide metabolic process and integral to membrane localization                                                                                      | prot_ID_1045 | AO090010000353     |



**AO090010000404 cluster**

| Gene id (SMURF)       | Gene positions | Gene distance | Gene Name | Annotated_gene_function                                                                                                                                                                                                             | antiSMASH ID | AspGD ID               |
|-----------------------|----------------|---------------|-----------|-------------------------------------------------------------------------------------------------------------------------------------------------------------------------------------------------------------------------------------|--------------|------------------------|
| n/a                   |                |               |           |                                                                                                                                                                                                                                     | prot_ID_568  | AO090010000388         |
| AO090010000390        | -11            | 1043          |           | Domain(s) with predicted nucleotide binding, oxidoreductase activity and role in oxidation-reduction process                                                                                                                        | prot_ID_495  | AO090010000390 ECS, FA |
| AO090010000391        | -10            | 175           |           | Domain(s) with predicted DNA binding, zinc ion binding activity, role in transcription, DNA-dependent and nucleus localization                                                                                                      | prot_ID_820  | AO090010000391         |
| AO090010000392        | -9             | 693           |           | Domain(s) with predicted role in transmembrane transport and integral to membrane localization                                                                                                                                      | prot_ID_651  | AO090010000392         |
| AO090010000393        | -8             | 1711          |           | Domain(s) with predicted carbon-carbon lyase activity and role in cellular aromatic compound metabolic process                                                                                                                      | prot_ID_960  | AO090010000393         |
| AO090010000397        | -7             | 162           |           | Protein of unknown function                                                                                                                                                                                                         | prot_ID_264  | AO090010000397         |
| AO090010000398        | -6             | 969           |           | Domain(s) with predicted oxidoreductase activity, acting on paired donors, with incorporation or reduction of molecular oxygen, 2-oxoglutarate as one donor, and incorporation of one atom each of oxygen into both donors activity | prot_ID_329  | AO090010000398         |
| AO090010000399        | -5             | 825           |           | Domain(s) with predicted ribosome binding, translation elongation factor activity                                                                                                                                                   | prot_ID_919  | AO090010000399         |
| AO090010000400        | -4             | 880           |           | Domain(s) with predicted L-ascorbic acid binding, iron ion binding, oxidoreductase activity, acting on paired donors, with incorporation or reduction of molecular oxygen and 2-oxoglutarate as one donor, more                     | prot_ID_366  | AO090010000400         |
| AO090010000401        | -3             | 51            |           | Ortholog of A. nidulans FGSC A4 : AN2942, AN10320, AN7130, A. fumigatus Af293 : Afu3g15110 and A. niger CBS 513.88 : An03g05620, An15g07840, An12g07260, An03g02580, An01g14840                                                     | prot_ID_830  | AO090010000401         |
| AO090010000402        | -2             | 807           |           | Domain(s) with predicted ACP phosphopantetheine attachment site binding involved in fatty acid biosynthetic process, nucleotide binding, oxidoreductase activity and transferase activity, more                                     | prot_ID_537  | AO090010000402         |
| AO090010000403        | -1             | 317           |           | Ortholog(s) have role in asperfuranone biosynthetic process                                                                                                                                                                         | prot_ID_1034 | AO090010000403         |
| <b>AO090010000404</b> | 0              | 0             |           | Polyketide synthase                                                                                                                                                                                                                 | prot_ID_677  | AO090010000404         |
| AO090010000405        | 1              | 723           |           | Ortholog(s) have role in fumiquinazoline A biosynthetic process, monodictyphenone biosynthetic process                                                                                                                              | prot_ID_50   | AO090010000405         |
| AO090010000406        | 2              | 84            |           | Mitochondrial carrier protein                                                                                                                                                                                                       | prot_ID_626  | AO090010000406         |
| AO090010000407        | 3              | 988           |           | Domain(s) with predicted role in transmembrane transport and integral to membrane localization                                                                                                                                      | prot_ID_10   | AO090010000407 ECS     |
| n/a                   |                |               |           | Protein of unknown function                                                                                                                                                                                                         | prot_ID_328  | AO090010000408         |
| n/a                   |                |               |           | Protein of unknown function                                                                                                                                                                                                         | prot_ID_507  | AO090010000410         |
| n/a                   |                |               |           | Protein of unknown function                                                                                                                                                                                                         | prot_ID_523  | AO090010000412         |
| n/a                   |                |               |           | Protein of unknown function                                                                                                                                                                                                         | prot_ID_971  | AO090010000413         |

n/a

Protein of unknown function

prot\_ID\_402 AO090010000414

## AO90010000426 cluster

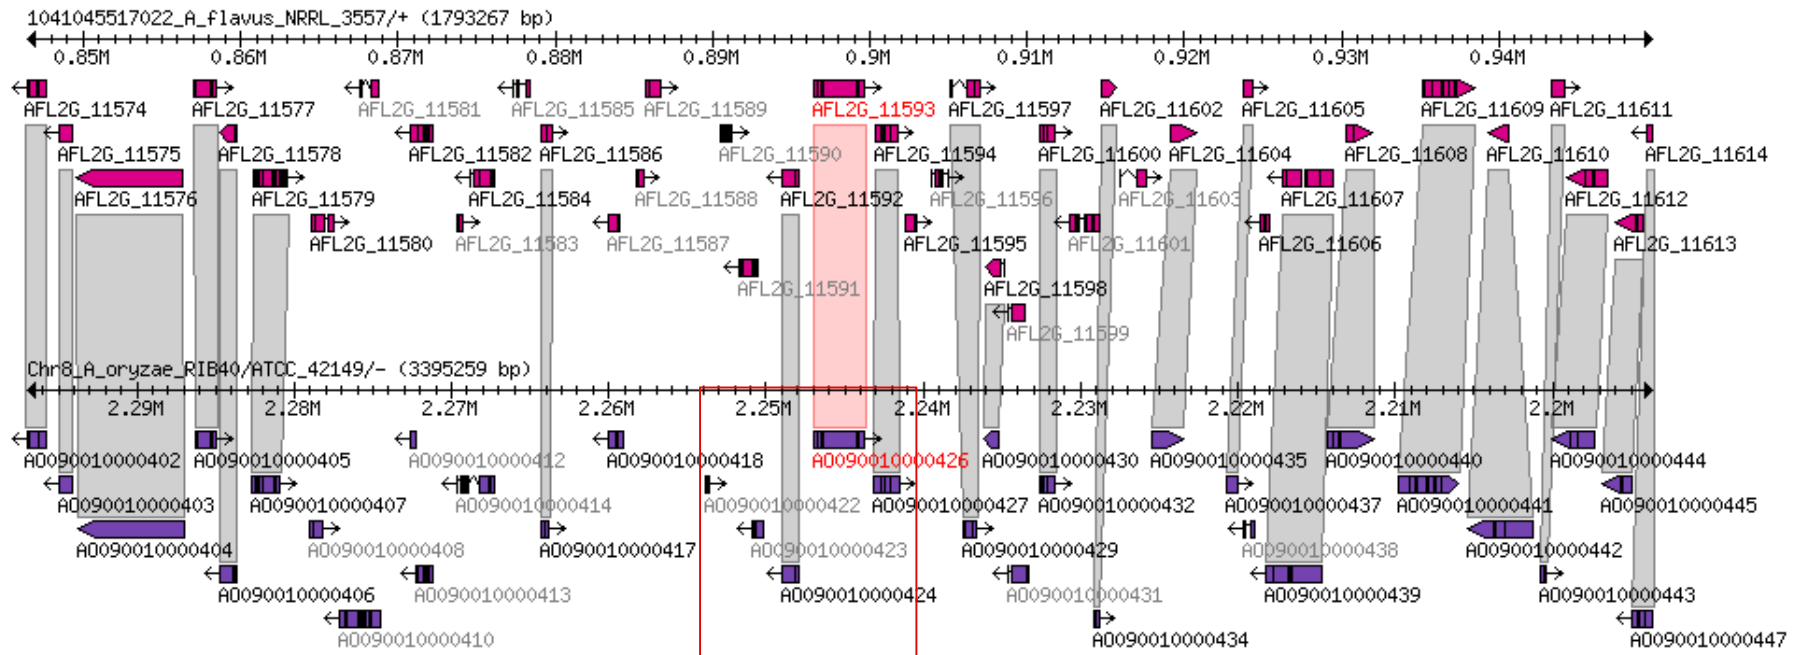

**AO090010000426 cluster**

| Gene id (SMURF)       | Gene positions | Gene distance | Gene Name | Annotated_gene_function                                                                                                                                                                                                        | antiSMASH ID | AspGD ID                |
|-----------------------|----------------|---------------|-----------|--------------------------------------------------------------------------------------------------------------------------------------------------------------------------------------------------------------------------------|--------------|-------------------------|
| n/a                   |                |               |           | Domain(s) with predicted role in cell wall macromolecule catabolic process                                                                                                                                                     | prot_ID_692  | AO090010000417          |
| n/a                   |                |               |           | Ortholog of A. nidulans FGSC A4 : AN3529, AN4144, AN8311, AN4846, A. fumigatus Af293 : Afu1g17260, Afu4g07950, Afu4g09380, Afu6g00560, Afu6g12140, Afu8g01900 and A. niger CBS 513.88 : An16g06170, An06g00470, An11g07840     | prot_ID_978  | AO090010000418          |
| n/a                   |                |               |           | Protein of unknown function                                                                                                                                                                                                    | prot_ID_415  | AO090010000422 IGD      |
| n/a                   |                |               |           | Domain(s) with predicted DNA binding, zinc ion binding activity, role in transcription, DNA-dependent and nucleus localization                                                                                                 | prot_ID_1000 | AO090010000423          |
| AO090010000424        | -1             | 941           |           | Domain(s) with predicted catalytic activity, coenzyme binding, nucleotide binding activity and role in cellular metabolic process                                                                                              | prot_ID_805  | AO090010000424          |
| <b>AO090010000426</b> | 0              | 0             |           | Domain(s) with predicted ACP phosphopantetheine attachment site binding involved in fatty acid biosynthetic process, catalytic activity, nucleotide binding, phosphopantetheine binding activity and role in metabolic process | prot_ID_910  | AO090010000426          |
| n/a                   |                |               |           | Beta-lactamase                                                                                                                                                                                                                 | prot_ID_176  | AO090010000427 IGD, ECS |
| n/a                   |                |               |           | Domain(s) with predicted nucleotide binding, oxidoreductase activity and role in oxidation-reduction process                                                                                                                   | prot_ID_278  | AO090010000429          |
| n/a                   |                |               |           | Ortholog of A. flavus NRRL 3357 : AFL2T_11598                                                                                                                                                                                  | prot_ID_465  | AO090010000430          |
| n/a                   |                |               |           | Protein of unknown function                                                                                                                                                                                                    | prot_ID_1053 | AO090010000431          |
| n/a                   |                |               |           | Domain(s) with predicted role in response to stress and integral to membrane localization (2)                                                                                                                                  | prot_ID_315  | AO090010000432          |
| n/a                   |                |               |           | Ortholog of A. flavus NRRL 3357 : AFL2T_11602                                                                                                                                                                                  | prot_ID_232  | AO090010000434          |
| n/a                   |                |               |           | Ortholog of A. nidulans FGSC A4 : AN0213, A. fumigatus Af293 : Afu5g10950, A. niger CBS 513.88 : An14g02320, A. niger ATCC 1015 : 201495-mRNA and A. versicolor : Aspve1_0048464                                               | prot_ID_813  | AO090010000435          |

## AO090010000498 cluster

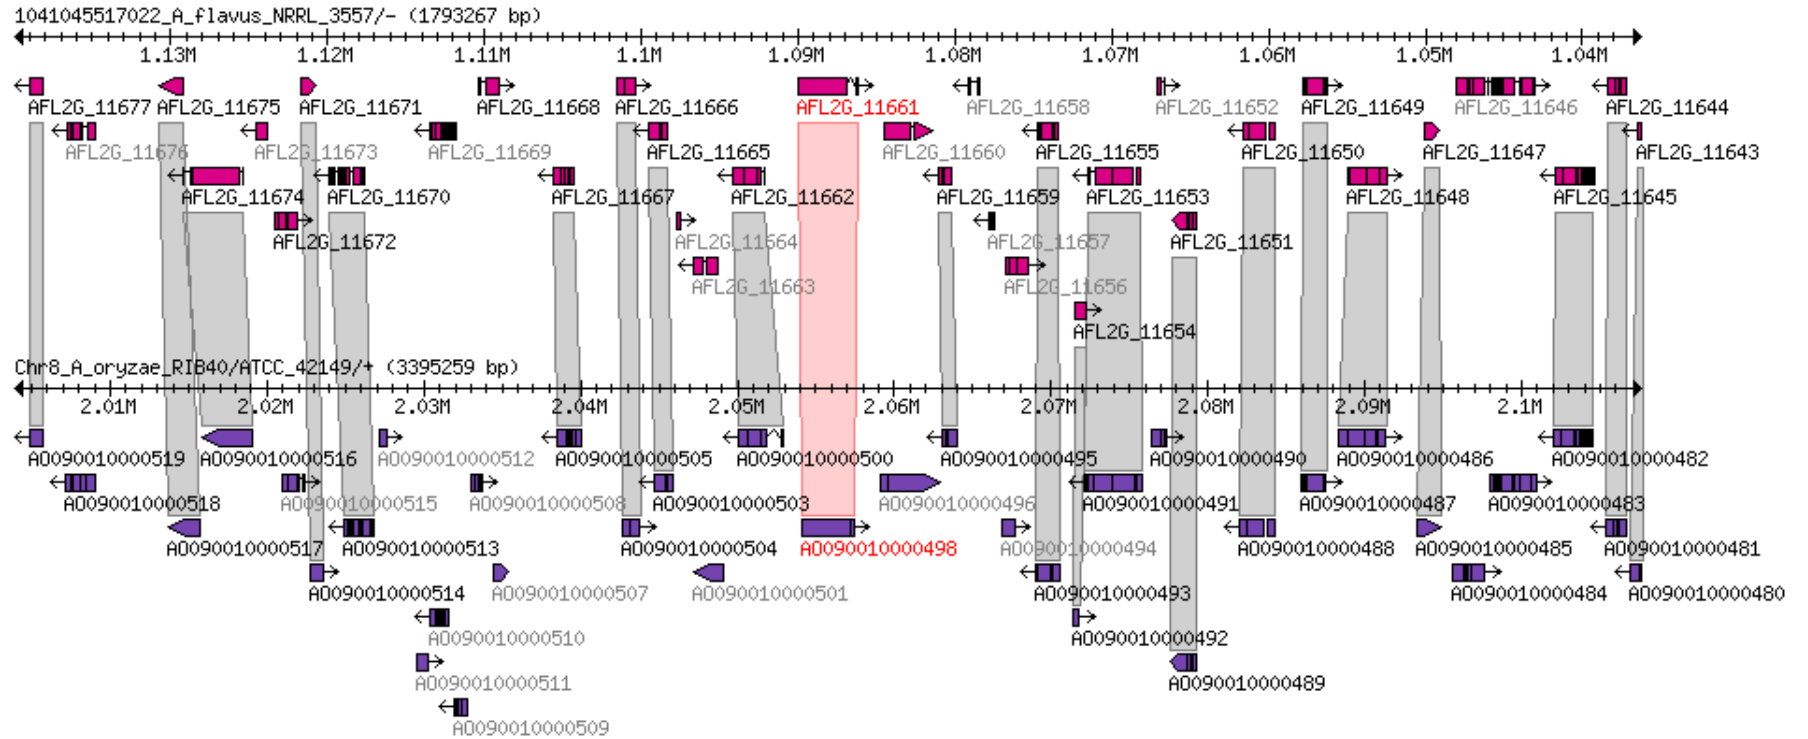



**AO090010000498 cluster**

| Gene id (SMURF)       | Gene positions | Gene distance | Gene Name | Annotated_gene_function                                                                                                                                                                                | antiSMASH ID | AspGD ID       |
|-----------------------|----------------|---------------|-----------|--------------------------------------------------------------------------------------------------------------------------------------------------------------------------------------------------------|--------------|----------------|
| AO090010000488        | -9             | 2966          |           | Domain(s) with predicted substrate-specific transmembrane transporter activity, role in transmembrane transport and integral to membrane localization                                                  | n/a          | AO090010000488 |
| AO090010000489        | -8             | 127           |           | Ortholog(s) have URM1 activating enzyme activity, nitrate reductase (NADPH) activity, protein adenyltransferase activity, thiosulfate sulfurtransferase activity                                       | n/a          | AO090010000489 |
| AO090010000490        | -7             | 1009          |           | Ortholog of A. fumigatus Af293 : Afu5g10470, N. fischeri NRRL 181 : NFIA_076780, A. clavatus NRRL 1 : ACLA_013500, A. terreus NIH2624 : ATET_07599 and A. fumigatus A1163 : AFUB_058060                | prot_ID_542  | AO090010000490 |
| AO090010000491        | -6             | 278           |           | Ortholog of A. nidulans FGSC A4 : AN10292, AN7172, A. fumigatus Af293 : Afu5g10460, A. niger CBS 513.88 : An14g02030, An14g04320, A. oryzae RIB40 : AO090011000125 and A. niger ATCC 1015 : 41626-mRNA | prot_ID_992  | AO090010000491 |
| AO090010000492        | -5             | 1097          |           | Ortholog of A. nidulans FGSC A4 : AN7961, A. fumigatus Af293 : Afu4g13760, A. versicolor : Aspve1_0045462, A. sydowii : Aspsy1_1151790 and A. terreus NIH2624 : ATET_04942                             | prot_ID_384  | AO090010000492 |
| AO090010000493        | -4             | 1426          |           | Neutral protease II; expression increased in MAT1-1 strain compared to MAT1-2 strain                                                                                                                   | prot_ID_763  | AO090010000493 |
| AO090010000494        | -3             | 2943          |           | Domain(s) with predicted hydrolase activity, hydrolyzing O-glycosyl compounds activity and role in carbohydrate metabolic process                                                                      | prot_ID_171  | AO090010000494 |
| AO090010000495        | -2             | 348           |           | Domain(s) with predicted N-acetyltransferase activity and role in metabolic process                                                                                                                    | prot_ID_690  | AO090010000495 |
| AO090010000496        | -1             | 1861          |           | Histidine kinase-like ATPase, two-component response regulator                                                                                                                                         | prot_ID_90   | AO090010000496 |
| <b>AO090010000498</b> | 0              | 0             |           | <b>Non-ribosomal peptide synthetase</b>                                                                                                                                                                | prot_ID_1068 | AO090010000498 |
| AO090010000500        | 1              | 1307          |           | Domain(s) with predicted role in transmembrane transport and integral to membrane localization                                                                                                         | prot_ID_37   | AO090010000500 |
| n/a                   |                |               |           | Protein of unknown function                                                                                                                                                                            | prot_ID_660  | AO090010000501 |
| n/a                   |                |               |           | Ortholog(s) have role in cleistothecium development, negative regulation of cleistothecium development                                                                                                 | prot_ID_502  | AO090010000503 |
| n/a                   |                |               | pel1      | Pectin lyase with role in pectin degradation                                                                                                                                                           | prot_ID_811  | AO090010000504 |
| n/a                   |                |               | sdhB      | Succinate dehydrogenase (SDH); mutation confers resistance to the fungicide, carboxin, which interferes with electron transfer from SDH to ubiquinone                                                  | prot_ID_345  | AO090010000505 |
| n/a                   |                |               |           | Protein of unknown function                                                                                                                                                                            | prot_ID_319  | AO090010000507 |

# AO9001100015 cluster

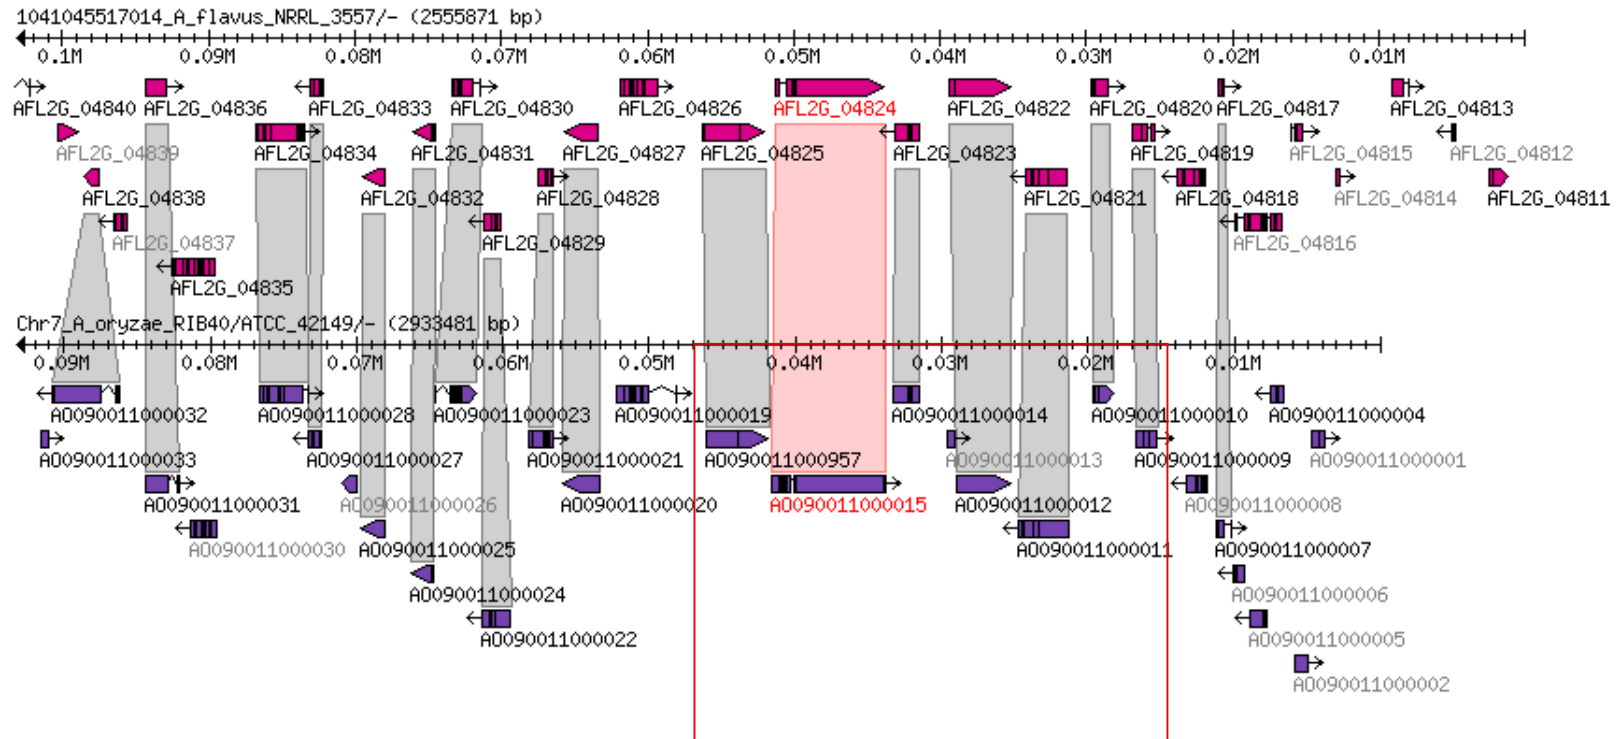

**AO090011000015 cluster**

| Gene id (SMURF)       | Gene positions | Gene distance | Gene Name | Annotated_gene_function                                                                                                                                                                                           | antiSMASH ID | AspGD ID           |
|-----------------------|----------------|---------------|-----------|-------------------------------------------------------------------------------------------------------------------------------------------------------------------------------------------------------------------|--------------|--------------------|
| AO090011000023        | -6             | 492           |           | Domain(s) with predicted role in transmembrane transport and integral to membrane localization                                                                                                                    | n/a          |                    |
| AO090011000022        | -5             | 2808          |           | Ortholog(s) have alternative oxidase activity, role in alternative respiration, cellular response to oxidative stress and mitochondrion localization                                                              | prot_ID_170  | AO090011000022     |
| AO090011000021        | -4             | 686           |           | Ortholog of A. fumigatus Af293 : Afu1g17050, Afu3g01470, A. niger CBS 513.88 : An03g01670, An10g00970, An13g03140, A. oryzae RIB40 : AO090026000122 and A. niger ATCC 1015 : 194603-mRNA, 45030-mRNA              | prot_ID_271  | AO090011000021     |
| AO090011000020        | -3             | 1552          |           | Domain(s) with predicted role in cell adhesion                                                                                                                                                                    | prot_ID_758  | AO090011000020     |
| AO090011000019        | -2             | 1963          |           | Putative cysteine synthase B                                                                                                                                                                                      | prot_ID_753  | AO090011000019     |
| AO090011000957        | -1             | 668           |           | Domain(s) with predicted ATP binding, ATPase activity, coupled to transmembrane movement of substances activity, role in transmembrane transport and integral to membrane localization                            | prot_ID_898  | AO090011000957 ECS |
| <b>AO090011000015</b> | 0              | 0             |           | Polyketide synthase                                                                                                                                                                                               | prot_ID_52   | AO090011000015     |
| AO090011000014        | 1              | 519           |           | Domain(s) with predicted role in transmembrane transport and integral to membrane localization                                                                                                                    | prot_ID_447  | AO090011000014     |
| AO090011000013        | 2              | 2048          |           | Protein of unknown function                                                                                                                                                                                       | prot_ID_879  | AO090011000013     |
| AO090011000012        | 3              | 217           |           | Ortholog of A. nidulans FGSC A4 : AN3342, AN10302, AN4609, A. fumigatus Af293 : Afu7g06670, A. niger CBS 513.88 : An04g04320, An16g05670, An04g03250 and A. niger ATCC 1015 : 190482-mRNA, 36572-mRNA, 44094-mRNA | prot_ID_357  | AO090011000012     |
| AO090011000011        | 4              | 998           |           | Domain(s) with predicted GTP binding, GTPase activity                                                                                                                                                             | prot_ID_390  | AO090011000011     |
| AO090011000010        | 5              | 1825          |           | Ortholog of A. fumigatus Af293 : Afu6g11720, A. niger CBS 513.88 : An08g04630, A. brasiliensis : Aspbr1_0028913, A. niger ATCC 1015 : 126535-mRNA and N. fischeri NRRL 181 : NFIA_057390                          | prot_ID_779  | AO090011000010     |
| AO090011000009        | 6              | 1612          |           | Domain(s) with predicted cysteine dioxygenase activity, iron ion binding activity and role in L-cysteine metabolic process, oxidation-reduction process                                                           | prot_ID_255  | AO090011000009 ECS |
| AO090011000008        | 7              | 2059          |           | Domain(s) with predicted role in transmembrane transport and integral to membrane localization                                                                                                                    | n/a          | AO090011000008     |
| AO090011000007        | 8              | 854           |           | Ortholog of A. nidulans FGSC A4 : AN9185, AN12413, A. brasiliensis : Aspbr1_0035352, A. niger ATCC 1015 : 55148-mRNA and A. flavus NRRL 3357 : AFL2T_04817                                                        | n/a          | AO090011000007     |
| AO090011000006        | 9              | 90            |           | Protein of unknown function                                                                                                                                                                                       | n/a          | AO090011000006     |
| AO090011000005        | 10             | 435           |           | Domain(s) with predicted sequence-specific DNA binding RNA polymerase II transcription factor activity, zinc ion binding activity, role in regulation of transcription, DNA-dependent and nucleus localization    | n/a          | AO090011000005     |

|                |    |     |                                                                                                                 |     |                |
|----------------|----|-----|-----------------------------------------------------------------------------------------------------------------|-----|----------------|
| AO090011000004 | 11 | 330 | Domain(s) with predicted nucleotide binding, oxidoreductase activity and<br>role in oxidation-reduction process | n/a | AO090011000004 |
| n/a            |    |     | Protein of unknown function                                                                                     | n/a | AO090011000002 |

## A009001100043 cluster

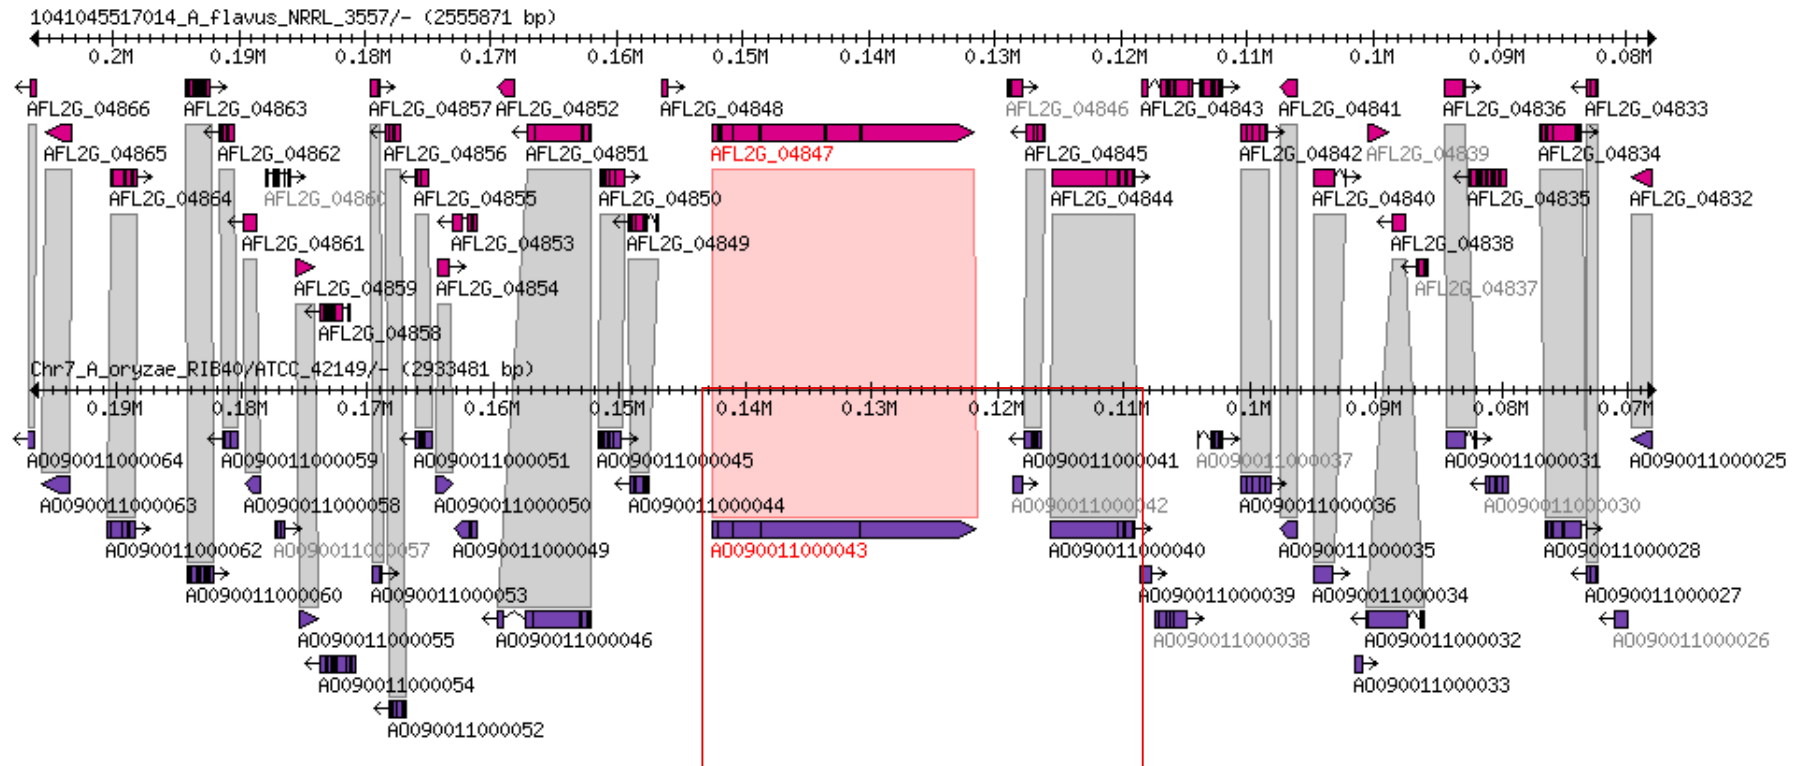

**AO090011000043 cluster**

| Gene id (SMURF)       | Gene positions | Gene distance | Gene Name | Annotated_gene_function                                                                                                                                                                                                                   | antiSMASH ID | AspGD ID           |
|-----------------------|----------------|---------------|-----------|-------------------------------------------------------------------------------------------------------------------------------------------------------------------------------------------------------------------------------------------|--------------|--------------------|
| n/a                   |                |               |           | Domain(s) with predicted transporter activity, role in transmembrane transport and integral to membrane localization                                                                                                                      | prot_ID_454  | AO090011000049     |
| n/a                   |                |               |           | Domain(s) with predicted 3-oxoacyl-[acyl-carrier-protein] reductase (NADPH) activity, aspartic-type endopeptidase activity, fatty-acyl-CoA synthase activity, nucleotide binding activity                                                 | prot_ID_706  | AO090011000046     |
| n/a                   |                |               | CYP548H1  | Cytochrome P450 monooxygenase                                                                                                                                                                                                             | prot_ID_561  | AO090011000045     |
| n/a                   |                |               |           | Domain(s) with predicted branched-chain-amino-acid transaminase activity and role in branched-chain amino acid metabolic process                                                                                                          | prot_ID_183  | AO090011000044     |
| <b>AO090011000043</b> | 0              | 0             |           | <b>Non-ribosomal peptide synthetase</b>                                                                                                                                                                                                   | prot_ID_2    | AO090011000043 ECS |
| AO090011000042        | 1              | 3078          |           | <b>Protein of unknown function</b>                                                                                                                                                                                                        | prot_ID_490  | AO090011000042     |
| AO090011000041        | 2              | 387           |           | <b>Domain(s) with predicted role in response to stress and integral to membrane localization</b>                                                                                                                                          | prot_ID_370  | AO090011000041     |
| AO090011000040        | 3              | 911           |           | <b>Domain(s) with predicted enoyl-[acyl-carrier-protein] reductase (NADH) activity, role in fatty acid biosynthetic process, oxidation-reduction process and fatty acid synthase complex localization</b>                                 | prot_ID_884  | AO090011000040 ECS |
| AO090011000039        | 4              | 503           |           | Ortholog of <i>A. nidulans</i> FGSC A4 : AN7874, AN10158, <i>A. fumigatus</i> Af293 : Afu1g12200, Afu3g00570, Afu8g02315, <i>A. niger</i> CBS 513.88 : An08g04520, An06g00280 and <i>A. oryzae</i> RIB40 : AO090001000324, AO090010000032 | prot_ID_785  | AO090011000039     |
| AO090011000038        | 5              | 402           |           | Domain(s) with predicted ATP binding, ATPase activity, coupled to transmembrane movement of substances activity, role in transmembrane transport and integral to membrane localization                                                    | prot_ID_398  | AO090011000038     |
| AO090011000037        | 6              | 788           |           | Domain(s) with predicted ATP binding, ATPase activity                                                                                                                                                                                     | prot_ID_654  | AO090011000037     |
| AO090011000036        | 7              | 1334          |           | Neutral protease I                                                                                                                                                                                                                        | n/a          | AO090011000036     |
| AO090011000035        | 8              | 909           |           | Ortholog of <i>A. nidulans</i> FGSC A4 : AN3259, <i>A. flavus</i> NRRL 3357 : AFL2T_04841, <i>A. versicolor</i> : Aspve1_0040331 and <i>A. sydowii</i> : Apsy1_0029969                                                                    | n/a          | AO090011000035     |
| AO090011000034        | 9              | 1270          |           | Domain(s) with predicted amino acid transmembrane transporter activity, role in amino acid transmembrane transport and membrane localization                                                                                              | n/a          | AO090011000034     |
| AO090011000033        | 10             | 1704          |           | Ortholog of <i>N. fischeri</i> NRRL 181 : NFIA_108740 and <i>A. carbonarius</i> ITEM 5010 : Acar5010_010490                                                                                                                               | n/a          | AO090011000033     |
| AO090011000032        | 11             | 2406          |           | Domain(s) with predicted metal ion transmembrane transporter activity, role in metal ion transport, transmembrane transport and membrane localization                                                                                     | n/a          | AO090011000032     |

|                |    |      |                                                                                                                                              |     |                |
|----------------|----|------|----------------------------------------------------------------------------------------------------------------------------------------------|-----|----------------|
| AO090011000031 | 12 | 1854 | Domain(s) with predicted amino acid transmembrane transporter activity, role in amino acid transmembrane transport and membrane localization | n/a | AO090011000031 |
|----------------|----|------|----------------------------------------------------------------------------------------------------------------------------------------------|-----|----------------|

# AO90011000103 cluster

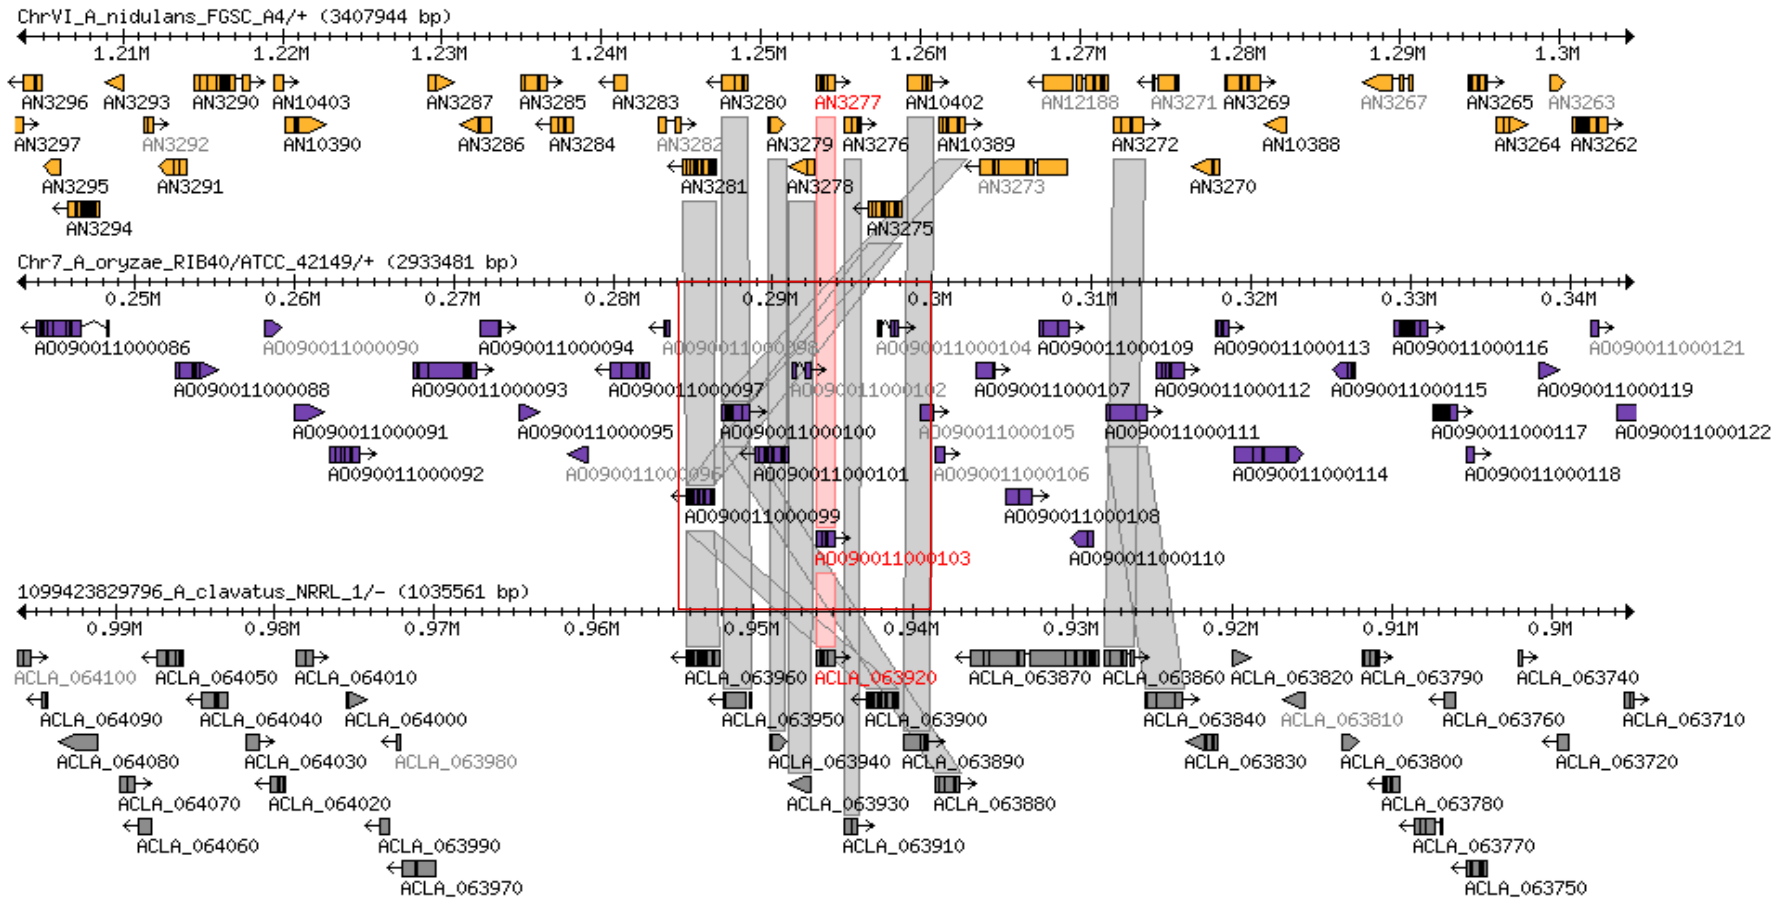



**AO090011000103 cluster**

| Gene id (SMURF) | Gene positions | Gene distance | Gene Name | Annotated_gene_function                                                                                                | antiSMASH ID | AspGD ID           |
|-----------------|----------------|---------------|-----------|------------------------------------------------------------------------------------------------------------------------|--------------|--------------------|
| n/a             |                |               |           | Protein of unknown function                                                                                            | prot_ID_814  | AO090011000098     |
| n/a             |                |               | CYP567D2  | Cytochrome P450 monooxygenase                                                                                          | prot_ID_410  | AO090011000099 ECS |
| n/a             |                |               | CYP654B1  | Cytochrome P450 monooxygenase                                                                                          | prot_ID_414  | AO090011000100     |
| n/a             |                |               | CYP682B2  | Cytochrome P450 monooxygenase                                                                                          | prot_ID_448  | AO090011000101     |
| n/a             |                |               |           | Domain(s) with predicted nucleotide binding activity                                                                   | prot_ID_109  | AO090011000102     |
| n/a             |                |               |           | Domain(s) with predicted magnesium ion binding, terpene synthase activity                                              | prot_ID_440  | AO090011000103     |
| n/a             |                |               |           | Domain(s) with predicted hydrolase activity and role in metabolic process                                              | prot_ID_49   | AO090011000104     |
| n/a             |                |               |           | Protein of unknown function                                                                                            | prot_ID_572  | AO090011000105 ECS |
| n/a             |                |               |           | Protein of unknown function                                                                                            | prot_ID_187  | AO090011000106     |
| n/a             |                |               |           | Ortholog of Aspergillus flavus NRRL 3357 : AFL2T_04903, A. versicolor : Aspve1_0031646 and A. sydowii : Aspsy1_0035800 | prot_ID_420  | AO090011000107     |

## A0090011000328 cluster

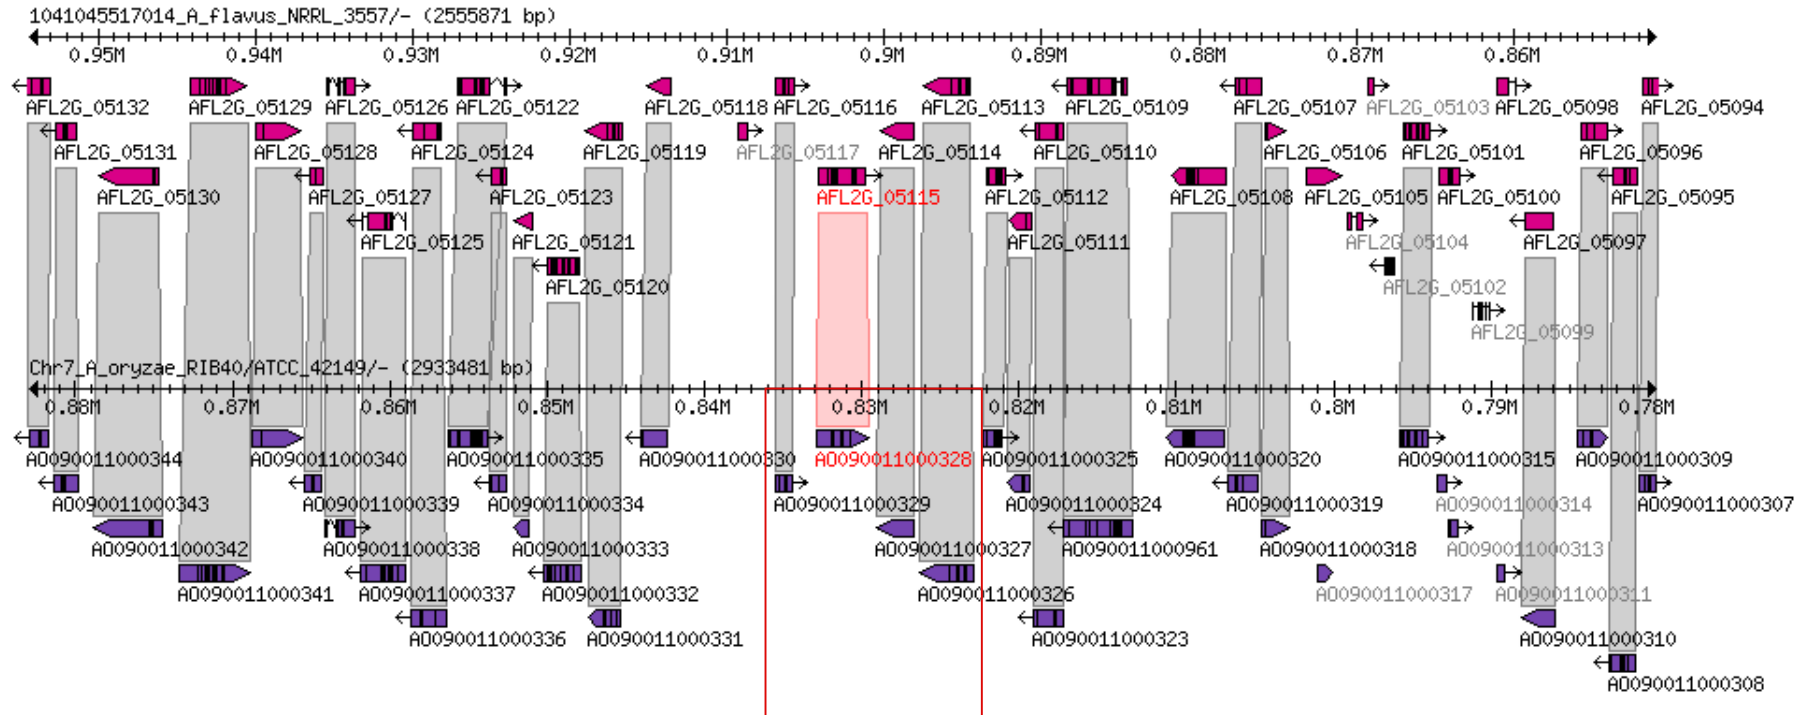

**AO090011000328 cluster**

| Gene id (SMURF)       | Gene positions | Gene distance | Gene Name | Annotated_gene_function                                                                                                                                                                                                                                                                                  | antiSMASH ID | AspGD ID       |          |
|-----------------------|----------------|---------------|-----------|----------------------------------------------------------------------------------------------------------------------------------------------------------------------------------------------------------------------------------------------------------------------------------------------------------|--------------|----------------|----------|
| n/a                   |                |               |           | Domain(s) with predicted hydrolase activity and role in metabolic process                                                                                                                                                                                                                                | prot_ID_500  | AO090011000333 |          |
| n/a                   |                |               |           | Domain(s) with predicted N,N-dimethylaniline monooxygenase activity, NADP binding, flavin adenine dinucleotide binding activity and role in oxidation-reduction process                                                                                                                                  | prot_ID_143  | AO090011000332 |          |
| n/a                   |                |               |           | Ortholog(s) have role in ferric triacetylfusarinine C transport                                                                                                                                                                                                                                          | prot_ID_165  | AO090011000331 |          |
| n/a                   |                |               |           | Domain(s) with predicted N,N-dimethylaniline monooxygenase activity, NADP binding, flavin adenine dinucleotide binding activity and role in oxidation-reduction process                                                                                                                                  | prot_ID_653  | AO090011000330 |          |
| n/a                   |                |               |           | Ortholog(s) have water channel activity, role in ascospore formation, water transport and plasma membrane localization                                                                                                                                                                                   | prot_ID_608  | AO090011000329 |          |
| <b>AO090011000328</b> | 0              | 0             |           | <b>Protein similar to nonribosomal peptide synthases (NRPS-like)</b>                                                                                                                                                                                                                                     | prot_ID_251  | AO090011000328 | IGD, ECS |
| AO090011000327        | 1              | 504           |           | Domain(s) with predicted zinc ion binding activity<br>Ortholog(s) have 3-hydroxyacyl-CoA dehydrogenase activity, enoyl-CoA hydratase activity, role in fatty acid beta-oxidation, very long-chain fatty acid catabolic process and peroxisome localization                                               | prot_ID_496  | AO090011000327 |          |
| AO090011000326        | 2              | 677           |           | Ortholog(s) have ATP binding activity and cytoplasm, nucleus localization                                                                                                                                                                                                                                | prot_ID_144  | AO090011000326 | ECC, IGD |
| AO090011000325        | 3              | 1022          |           |                                                                                                                                                                                                                                                                                                          | prot_ID_332  | AO090011000325 |          |
| AO090011000324        | 4              | 441           |           | Ortholog of A. nidulans FGSC A4 : AN7052, A. fumigatus Af293 : Afu4g03945, A. niger CBS 513.88 : An14g00940 and A. terreus NIH2624 : ATET_02247<br>Ortholog(s) have cystathionine beta-lyase activity, role in 'de novo' L-methionine biosynthetic process, transsulfuration and peroxisome localization | prot_ID_768  | AO090011000324 |          |
| AO090011000323        | 5              | 630           |           |                                                                                                                                                                                                                                                                                                          | prot_ID_269  | AO090011000323 |          |
| AO090011000961        | 6              | 525           |           | Cutinase transcription factor 1 alpha<br>Ortholog(s) have mannose-ethanolamine phosphotransferase activity, role in ATP transport, GPI anchor biosynthetic process and endoplasmic reticulum, fungal-type cell wall, fungal-type vacuole localization                                                    | prot_ID_896  | AO090011000961 |          |
| n/a                   |                |               |           |                                                                                                                                                                                                                                                                                                          | prot_ID_86   | AO090011000320 |          |

## A0090011000408 cluster

No prediction made

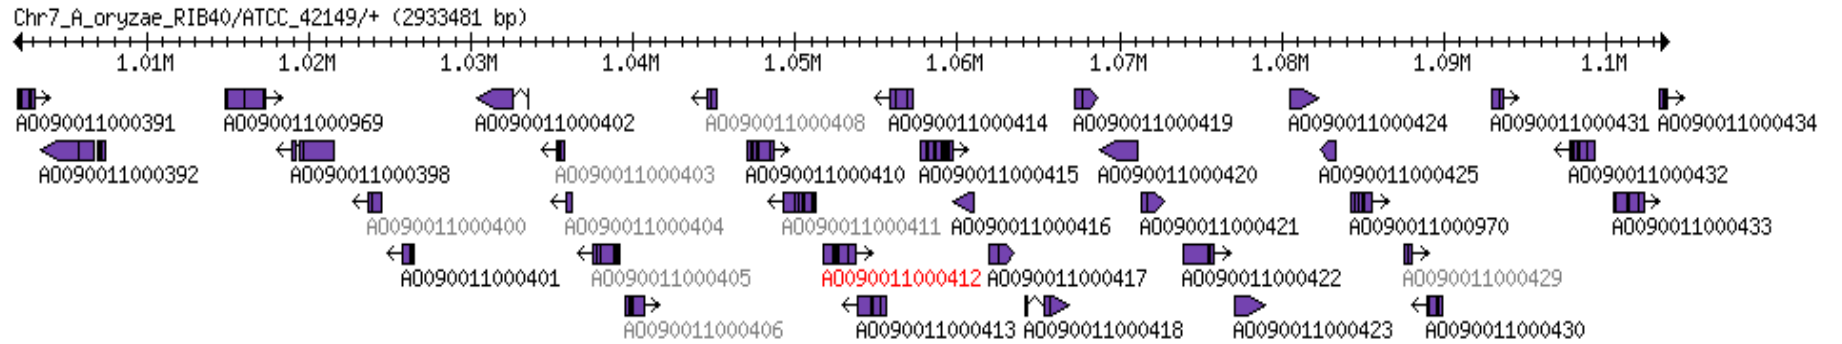

**AO090011000408 cluster**

| Gene id (SMURF) | Gene positions | Gene distance | Gene Name | Annotated_gene_function                                                                                                                                                                                                                    | antiSMASH ID | AspGD ID       |
|-----------------|----------------|---------------|-----------|--------------------------------------------------------------------------------------------------------------------------------------------------------------------------------------------------------------------------------------------|--------------|----------------|
| n/a             |                |               |           | Protein of unknown function                                                                                                                                                                                                                | prot_ID_316  | AO090011000403 |
| n/a             |                |               |           | Protein of unknown function                                                                                                                                                                                                                | prot_ID_722  | AO090011000404 |
| n/a             |                |               |           | Protein of unknown function                                                                                                                                                                                                                | prot_ID_406  | AO090011000405 |
| n/a             |                |               |           | Domain(s) with predicted role in response to stress and integral to membrane localization                                                                                                                                                  | prot_ID_809  | AO090011000406 |
| n/a             |                |               |           | Domain(s) with predicted magnesium ion binding, terpene synthase activity                                                                                                                                                                  | prot_ID_200  | AO090011000408 |
| n/a             |                |               |           | Domain(s) with predicted electron carrier activity, heme binding, iron ion binding, oxidoreductase activity, acting on paired donors, with incorporation or reduction of molecular oxygen activity and role in oxidation-reduction process | prot_ID_77   | AO090011000410 |
| n/a             |                |               | CYP5117A1 | Cytochrome P450 monooxygenase; upregulated by exposure to benomyl                                                                                                                                                                          | prot_ID_552  | AO090011000411 |
| n/a             |                |               | CYP68Q1   | Cytochrome P450 monooxygenase; involved in 7-hydroxycoumarin production and in diclofenac conversion; upregulated by exposure to benomyl                                                                                                   | prot_ID_195  | AO090011000412 |
| n/a             |                |               |           | Domain(s) with predicted role in transmembrane transport and integral to membrane localization                                                                                                                                             | prot_ID_122  | AO090011000413 |

## A0090011000738 cluster

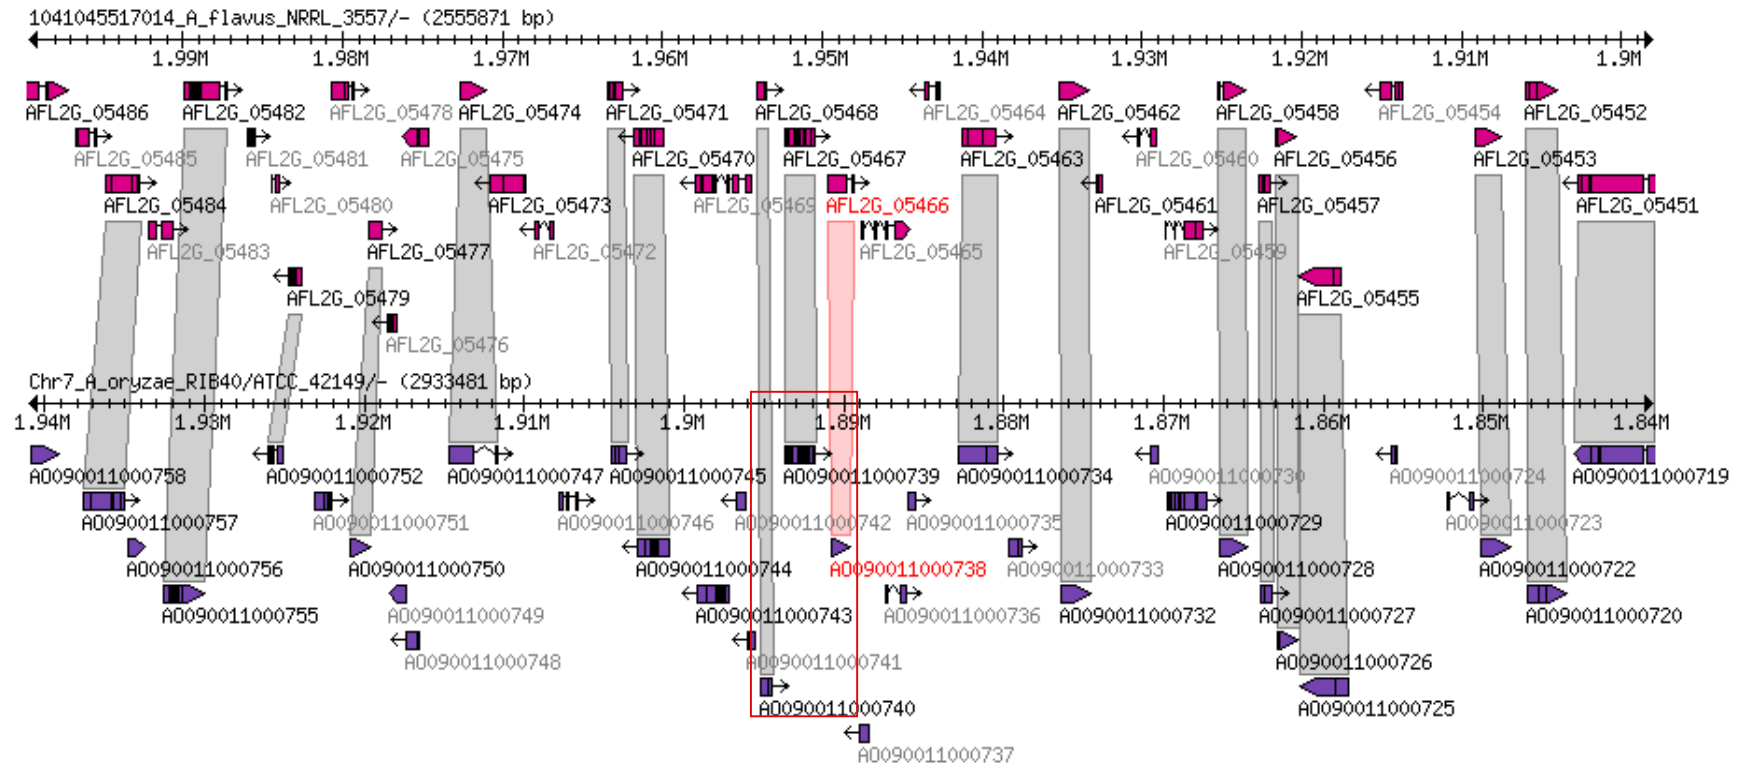

**AO090011000738 cluster**

| Gene id (SMURF)       | Gene positions | Gene distance | Gene Name | Annotated_gene_function                                                                                                                                                                                                                                                                                                                    | antiSMASH ID | AspGD ID       |            |
|-----------------------|----------------|---------------|-----------|--------------------------------------------------------------------------------------------------------------------------------------------------------------------------------------------------------------------------------------------------------------------------------------------------------------------------------------------|--------------|----------------|------------|
| AO090011000744        | -6             | 1992          |           | Domain(s) with predicted role in transmembrane transport and integral to membrane localization                                                                                                                                                                                                                                             | n/a          | AO090011000744 |            |
| AO090011000743        | -5             | 477           |           | Cytochrome P450 monooxygenase; expression increased in MAT1-1 strain compared to MAT1-2 strain                                                                                                                                                                                                                                             | prot_ID_13   | AO090011000743 |            |
| AO090011000742        | -4             | 80            |           | Protein of unknown function                                                                                                                                                                                                                                                                                                                | prot_ID_502  | AO090011000742 |            |
| AO090011000741        | -3             | 363           |           | Protein of unknown function                                                                                                                                                                                                                                                                                                                | prot_ID_366  | AO090011000741 |            |
| AO090011000740        | -2             | 731           |           | Ortholog(s) have role in austinol biosynthetic process, dehydroaustinol biosynthetic process<br>Domain(s) with predicted electron carrier activity, heme binding, iron ion binding, oxidoreductase activity, acting on paired donors, with incorporation or reduction of molecular oxygen activity and role in oxidation-reduction process | prot_ID_868  | AO090011000740 | ECS,<br>FA |
| AO090011000739        | -1             | 887           |           | Ortholog(s) have prenyltransferase activity and role in sterigmatocystin biosynthetic process, terrequinone A biosynthetic process                                                                                                                                                                                                         | prot_ID_436  | AO090011000739 |            |
| <b>AO090011000738</b> | 0              | 0             |           |                                                                                                                                                                                                                                                                                                                                            | prot_ID_57   | AO090011000738 | ECS,<br>FA |
| AO090011000737        | 1              | 559           |           | Protein of unknown function                                                                                                                                                                                                                                                                                                                | prot_ID_556  | AO090011000737 |            |
| AO090011000736        | 2              | 1130          |           | Protein of unknown function                                                                                                                                                                                                                                                                                                                | prot_ID_193  | AO090011000736 |            |
| AO090011000735        | 3              | 127           |           | Domain(s) with predicted ATP binding, helicase activity, role in rRNA processing, snRNA processing, snoRNA processing, tRNA processing, termination of RNA polymerase II transcription and nucleus localization                                                                                                                            | prot_ID_125  | AO090011000735 |            |
| AO090011000734        | 4              | 3111          |           | Na <sup>+</sup> /K <sup>+</sup> transporter                                                                                                                                                                                                                                                                                                | prot_ID_620  | AO090011000734 |            |
| AO090011000733        | 5              | 668           |           | Protein of unknown function                                                                                                                                                                                                                                                                                                                | prot_ID_411  | AO090011000733 |            |
| AO090011000732        | 6              | 2465          |           | Domain(s) with predicted D-amino-acid oxidase activity, nucleotide binding activity and role in oxidation-reduction process                                                                                                                                                                                                                | n/a          | AO090011000732 |            |
| AO090011000730        | 7              | 3716          |           | Protein of unknown function                                                                                                                                                                                                                                                                                                                | n/a          | AO090011000730 |            |
| AO090011000729        | 8              | 579           |           | Domain(s) with predicted DNA binding, sequence-specific DNA binding RNA polymerase II transcription factor activity, zinc ion binding activity and role in regulation of transcription, DNA-dependent, transcription, DNA-dependent                                                                                                        | n/a          | AO090011000729 |            |

## AO090012001034 cluster

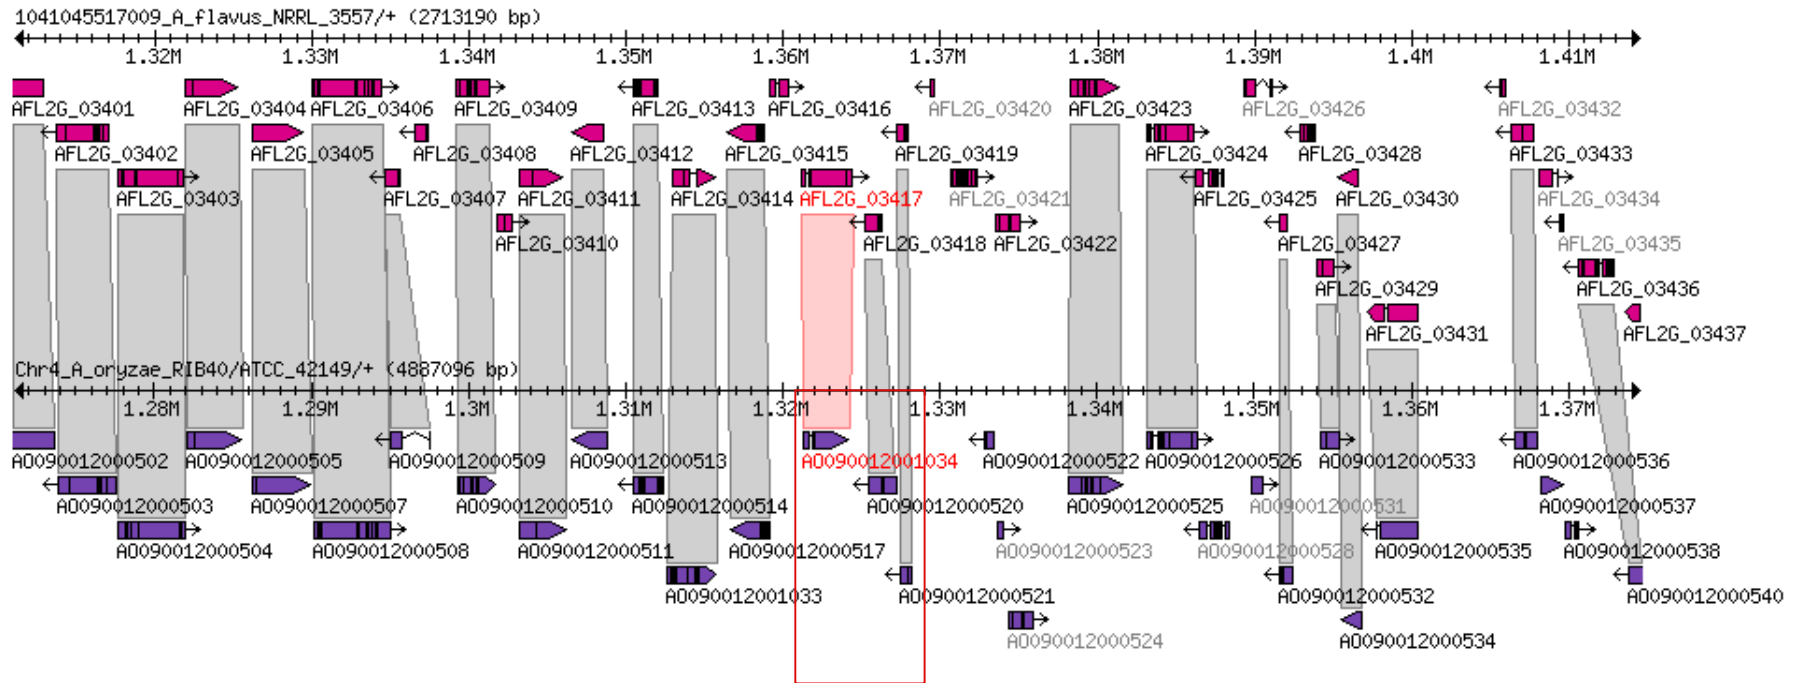



**AO090012001034 cluster**

| Gene id (SMURF)       | Gene positions | Gene distance | Gene Name | Annotated_gene_function                                                                                                                                                                                                        | antiSMASH ID | AspGD ID       |          |
|-----------------------|----------------|---------------|-----------|--------------------------------------------------------------------------------------------------------------------------------------------------------------------------------------------------------------------------------|--------------|----------------|----------|
| n/a                   |                |               |           | Ortholog(s) have transketolase activity, role in pentose-phosphate shunt and intracellular localization                                                                                                                        | prot_ID_34   | AO090012000526 |          |
| n/a                   |                |               | facB      | Sequence-specific DNA binding transcription factor                                                                                                                                                                             | prot_ID_853  | AO090012000525 |          |
| n/a                   |                |               |           | Protein of unknown function                                                                                                                                                                                                    | prot_ID_921  | AO090012000524 |          |
| n/a                   |                |               |           | Protein of unknown function                                                                                                                                                                                                    | prot_ID_288  | AO090012000523 |          |
| n/a                   |                |               |           | Ortholog of A. nidulans FGSC A4 : AN0691, A. fumigatus Af293 : Afu1g13530, A. niger CBS 513.88 : An08g06600, A. versicolor : Aspve1_0036230 and A. sydowii : Aspsy1_0041485                                                    | prot_ID_534  | AO090012000522 |          |
| n/a                   |                |               |           | Ortholog(s) have intracellular localization                                                                                                                                                                                    | prot_ID_238  | AO090012000521 | ECS, IGD |
| n/a                   |                |               |           | Ortholog(s) have intracellular localization                                                                                                                                                                                    | prot_ID_883  | AO090012000520 |          |
| <b>AO090012001034</b> | 0              | 0             |           | Domain(s) with predicted ACP phosphopantetheine attachment site binding involved in fatty acid biosynthetic process, catalytic activity, nucleotide binding, phosphopantetheine binding activity and role in metabolic process | prot_ID_1493 | AO090012001034 | ECS, IGD |
|                       |                |               |           | Ortholog(s) have role in mitotic cell cycle G2/M transition decatenation checkpoint, mitotic cell cycle spindle assembly checkpoint, nucleocytoplasmic transport and kinetochore, nuclear pore, nucleoplasm localization       |              |                |          |
| AO090012000517        | 1              | 2395          |           | Ortholog(s) have role in actin cortical patch assembly, septin cytoskeleton organization and cellular bud neck, cellular bud tip, mating projection base, mating projection tip localization                                   | prot_ID_1399 | AO090012000517 |          |
| AO090012001033        | 2              | 798           |           | Domain(s) with predicted ATP binding, protein serine/threonine kinase activity, protein tyrosine kinase activity and role in protein phosphorylation                                                                           | prot_ID_1489 | AO090012001033 |          |
| AO090012000514        | 3              | 523           |           |                                                                                                                                                                                                                                | prot_ID_887  | AO090012000514 |          |
|                       |                |               |           | Ortholog of A. nidulans FGSC A4 : AN0698, A. fumigatus Af293 : Afu1g13610, A. niger CBS 513.88 : An08g06690, A. niger ATCC 1015 : 52644-mRNA and A. versicolor : Aspve1_0048949                                                |              |                |          |
| AO090012000513        | 4              | 2010          |           |                                                                                                                                                                                                                                | prot_ID_264  | AO090012000513 |          |
| AO090012000511        | 5              | 825           |           | Domain(s) with predicted role in transmembrane transport                                                                                                                                                                       | prot_ID_649  | AO090012000511 |          |
| AO090012000510        | 6              | 1869          |           | Domain(s) with predicted monooxygenase activity and role in oxidation-reduction process                                                                                                                                        | prot_ID_1219 | AO090012000510 |          |

## A090020000159 cluster

No PKS or NRPS backbone

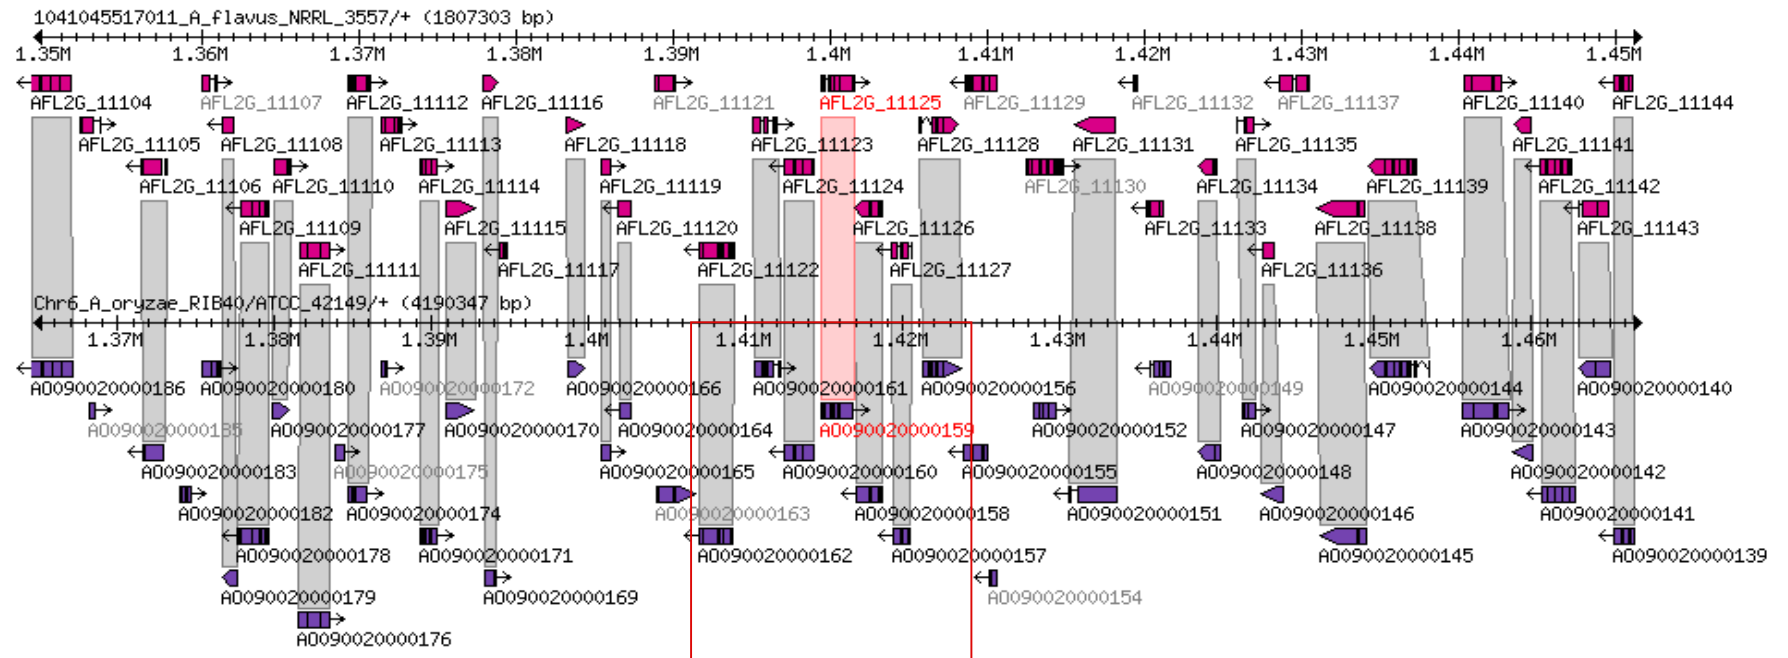

**AO090020000159 cluster**

| Gene id (SMURF) | Gene positions | Gene distance | Gene Name | Annotated_gene_function                                                                                                                                                                                              | antiSMASH ID | AspGD ID           |
|-----------------|----------------|---------------|-----------|----------------------------------------------------------------------------------------------------------------------------------------------------------------------------------------------------------------------|--------------|--------------------|
| n/a             |                |               |           | Protein of unknown function                                                                                                                                                                                          | prot_ID_278  | AO090020000154     |
| n/a             |                |               |           | Domain(s) with predicted oxidoreductase activity and role in oxidation-reduction process                                                                                                                             | prot_ID_992  | AO090020000155     |
| n/a             |                |               |           | Domain(s) with predicted nucleic acid binding, nucleotide binding, zinc ion binding activity and intracellular localization                                                                                          | prot_ID_699  | AO090020000156 ECS |
| n/a             |                |               |           | Ortholog of <i>A. flavus</i> NRRL 3357 : AFL2T_11127                                                                                                                                                                 | prot_ID_19   | AO090020000157     |
| n/a             |                |               |           | Domain(s) with predicted oxidoreductase activity and role in carotenoid biosynthetic process, chlorophyll biosynthetic process, oxidation-reduction process, photosynthesis                                          | prot_ID_845  | AO090020000158     |
| n/a             |                |               |           | Domain(s) with predicted intramolecular lyase activity, transferase activity and role in biosynthetic process                                                                                                        | prot_ID_321  | AO090020000159     |
| n/a             |                |               |           | Ortholog of <i>A. niger</i> CBS 513.88 : An12g00880, <i>A. brasiliensis</i> : Aspbr1_0211417, <i>A. flavus</i> NRRL 3357 : AFL2T_11124 and <i>A. acidus</i> : Aspfo1_0211604                                         | prot_ID_246  | AO090020000160     |
| n/a             |                |               |           | Ortholog of <i>A. nidulans</i> FGSC A4 : AN6458, <i>A. fumigatus</i> Af293 : Afu3g07420, <i>A. niger</i> CBS 513.88 : An02g10960, An01g01420, An12g05390 and <i>A. oryzae</i> RIB40 : AO090005000921, AO090003001427 | prot_ID_800  | AO090020000161     |
| n/a             |                |               |           | Domain(s) with predicted UDP-N-acetylmuramate dehydrogenase activity, flavin adenine dinucleotide binding activity and role in oxidation-reduction process                                                           | prot_ID_247  | AO090020000162 ECS |
| n/a             |                |               |           | Protein of unknown function                                                                                                                                                                                          | prot_ID_798  | AO090020000163     |

## A0090020000186 cluster

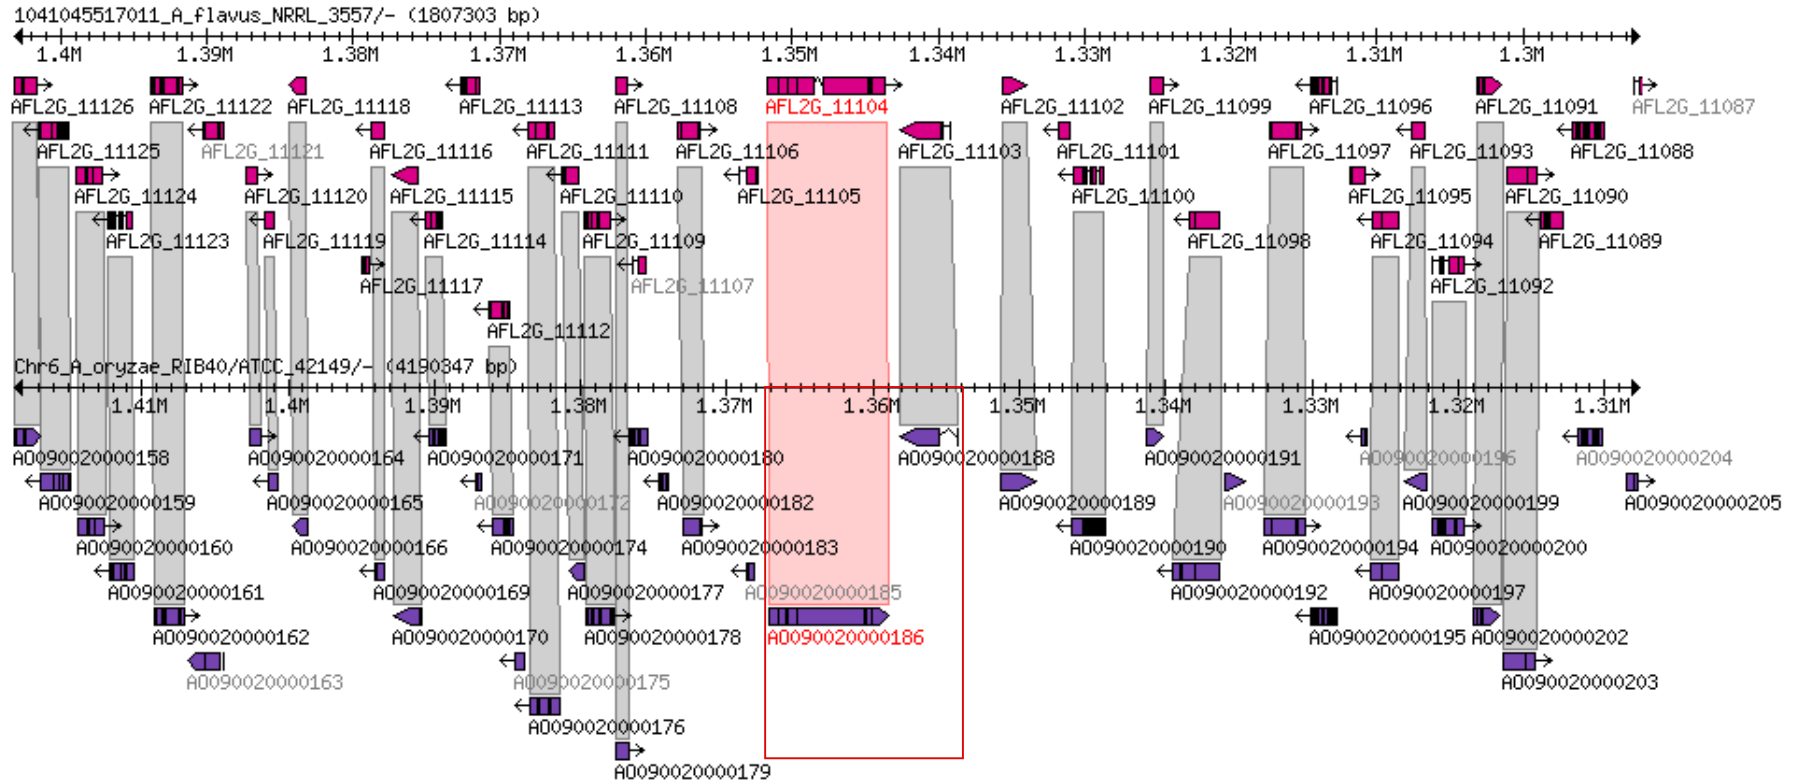

**AO090020000186 cluster**

| Gene id (SMURF)       | Gene positions | Gene distance | Gene Name | Annotated_gene_function                                                                                                                                                                                                              | antiSMASH ID | AspGD ID           |
|-----------------------|----------------|---------------|-----------|--------------------------------------------------------------------------------------------------------------------------------------------------------------------------------------------------------------------------------------|--------------|--------------------|
| n/a                   |                |               |           | Protein of unknown function                                                                                                                                                                                                          | prot_ID_917  | AO090020000172     |
| n/a                   |                |               |           | Domain(s) with predicted role in lipopolysaccharide biosynthetic process                                                                                                                                                             | prot_ID_678  | AO090020000174     |
| n/a                   |                |               |           | Domain(s) with predicted DNA binding, transposase activity and role in DNA integration, regulation of transcription, DNA-dependent, transposition, DNA-mediated                                                                      | prot_ID_1248 | AO090020000175     |
| n/a                   |                |               |           | Domain(s) with predicted catalytic activity, cation binding activity and role in carbohydrate metabolic process                                                                                                                      | prot_ID_375  | AO090020000176     |
| AO090020000177        | -7             | 242           |           | Domain(s) with predicted nucleotide binding, oxidoreductase activity and role in oxidation-reduction process                                                                                                                         | prot_ID_952  | AO090020000177     |
| AO090020000178        | -6             | 348           |           | Ortholog of <i>A. nidulans</i> FGSC A4 : AN6315, AN9346, <i>A. niger</i> CBS 513.88 : An08g05310 and <i>A. niger</i> ATCC 1015 : 38283-mRNA, 43466-mRNA, 46133-mRNA                                                                  | prot_ID_233  | AO090020000178     |
| AO090020000179        | -5             | 5             |           | Ortholog(s) have nitrate reductase (NADPH) activity and role in molybdopterin cofactor biosynthetic process                                                                                                                          | prot_ID_804  | AO090020000179     |
| AO090020000180        | -4             | 841           |           | Ortholog(s) have copper ion binding activity, role in copper ion transport, protein complex assembly and mitochondrial inner membrane localization                                                                                   | prot_ID_820  | AO090020000180     |
| AO090020000182        | -3             | 940           |           | Domain(s) with predicted zinc ion binding activity                                                                                                                                                                                   | prot_ID_506  | AO090020000182     |
| AO090020000183        | -2             | 2970          |           | Domain(s) with predicted UDP-N-acetylmuramate dehydrogenase activity, flavin adenine dinucleotide binding activity and role in oxidation-reduction process                                                                           | prot_ID_713  | AO090020000183     |
| AO090020000185        | -1             | 988           |           | Protein of unknown function                                                                                                                                                                                                          | prot_ID_690  | AO090020000185     |
| <b>AO090020000186</b> | 0              | 0             |           | <b>Polyketide synthase</b>                                                                                                                                                                                                           | prot_ID_286  | AO090020000186 ECS |
| AO090020000188        | 1              | 1370          |           | Ortholog of <i>A. nidulans</i> FGSC A4 : AN4840, <i>A. fumigatus</i> Af293 : Afu3g07350, <i>A. niger</i> CBS 513.88 : An02g13370, <i>A. niger</i> ATCC 1015 : 119945-mRNA and <i>A. versicolor</i> : Aspve1_0126685                  | prot_ID_1045 | AO090020000188 ECS |
| AO090020000189        | 2              | 3054          |           | Ortholog of <i>A. nidulans</i> FGSC A4 : AN4839, <i>A. fumigatus</i> Af293 : Afu3g07340, <i>A. niger</i> CBS 513.88 : An02g13380, <i>A. niger</i> ATCC 1015 : 130550-mRNA and <i>A. versicolor</i> : Aspve1_0051705                  | prot_ID_327  | AO090020000189     |
| AO090020000190        | 3              | 3094          |           | Domain(s) with predicted role in transmembrane transport and integral to membrane localization                                                                                                                                       | prot_ID_461  | AO090020000190     |
| AO090020000191        | 4              | 2904          |           | Ortholog of <i>A. nidulans</i> FGSC A4 : AN12127, <i>A. fumigatus</i> Af293 : Afu3g07310, <i>A. niger</i> CBS 513.88 : An02g13400, <i>A. niger</i> ATCC 1015 : 173674-mRNA and <i>A. versicolor</i> : Aspve1_0027262, Aspve1_0040450 | prot_ID_1165 | AO090020000191     |
| AO090020000192        | 5              | 2010          |           | Domain(s) with predicted acetyl-CoA transporter activity and integral to membrane localization                                                                                                                                       | n/a          | AO090020000192     |

## A090020000194 cluster

No PKS or NRPS backbone

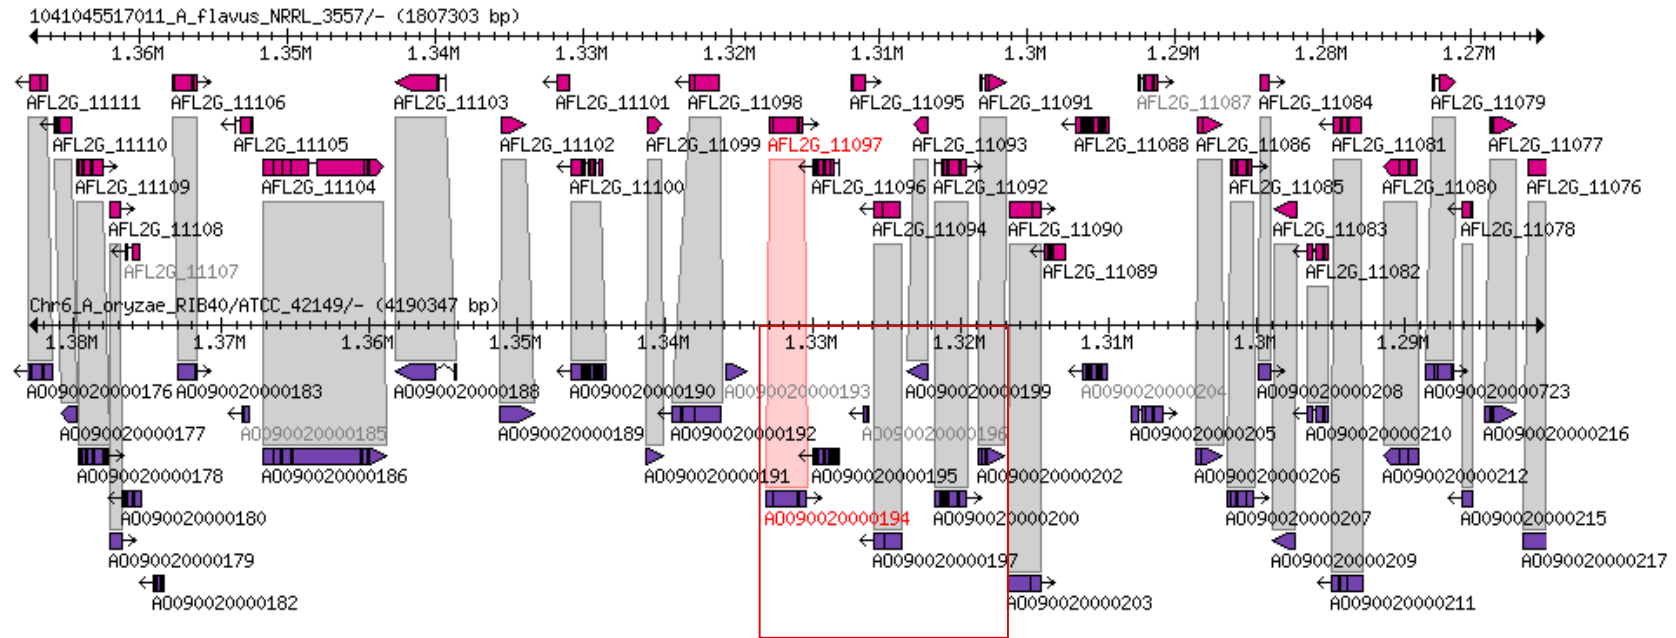

**AO090020000194 cluster**

| Gene id (SMURF) | Gene positions | Gene distance | Gene Name | Annotated_gene_function                                                                                                                                                                                                              | antiSMASH ID | AspGD ID               |
|-----------------|----------------|---------------|-----------|--------------------------------------------------------------------------------------------------------------------------------------------------------------------------------------------------------------------------------------|--------------|------------------------|
| n/a             |                |               |           | Ortholog of <i>A. nidulans</i> FGSC A4 : AN12127, <i>A. fumigatus</i> Af293 : Afu3g07310, <i>A. niger</i> CBS 513.88 : An02g13400, <i>A. niger</i> ATCC 1015 : 173674-mRNA and <i>A. versicolor</i> : Aspve1_0027262, Aspve1_0040450 | prot_ID_1165 | AO090020000191         |
| n/a             |                |               |           | Domain(s) with predicted acetyl-CoA transporter activity and integral to membrane localization                                                                                                                                       | prot_ID_629  | AO090020000192         |
| n/a             |                |               |           | Protein of unknown function                                                                                                                                                                                                          | prot_ID_85   | AO090020000193         |
| n/a             |                |               |           | Domain(s) with predicted intramolecular transferase activity                                                                                                                                                                         | prot_ID_815  | AO090020000194 ECS     |
| n/a             |                |               |           | Putative methyltransferase; upregulated in <i>A. oryzae</i> and <i>A. nidulans</i> under hypoxic growth conditions                                                                                                                   | prot_ID_267  | AO090020000195         |
| n/a             |                |               |           | Protein of unknown function                                                                                                                                                                                                          | prot_ID_837  | AO090020000196         |
| n/a             |                |               |           | Ortholog of <i>A. nidulans</i> FGSC A4 : AN4834, <i>A. fumigatus</i> Af293 : Afu3g07270, <i>A. niger</i> CBS 513.88 : An02g13430, <i>A. niger</i> ATCC 1015 : 37531-mRNA and <i>A. versicolor</i> : Aspve1_0126541                   | prot_ID_265  | AO090020000197         |
| n/a             |                |               |           | Domain(s) with predicted hydrolase activity and role in metabolic process                                                                                                                                                            | prot_ID_438  | AO090020000199         |
| n/a             |                |               |           | Ortholog of <i>A. nidulans</i> FGSC A4 : AN4832, <i>A. fumigatus</i> Af293 : Afu3g07240, <i>A. niger</i> CBS 513.88 : An02g13480, <i>A. niger</i> ATCC 1015 : 207429-mRNA and <i>A. versicolor</i> : Aspve1_0128671                  | prot_ID_1037 | AO090020000200 FA, ECS |
| n/a             |                |               |           | Similar to phosphopantothenoylcysteine synthetase/decarboxylase                                                                                                                                                                      | n/a          | AO090020000202         |
|                 |                |               |           | Domain(s) with predicted serine-type endopeptidase activity, transferase activity, transferring glycosyl groups activity, role in blood coagulation, proteolysis and extracellular region, membrane localization                     |              | AO090020000203         |

## AO9002000240 cluster

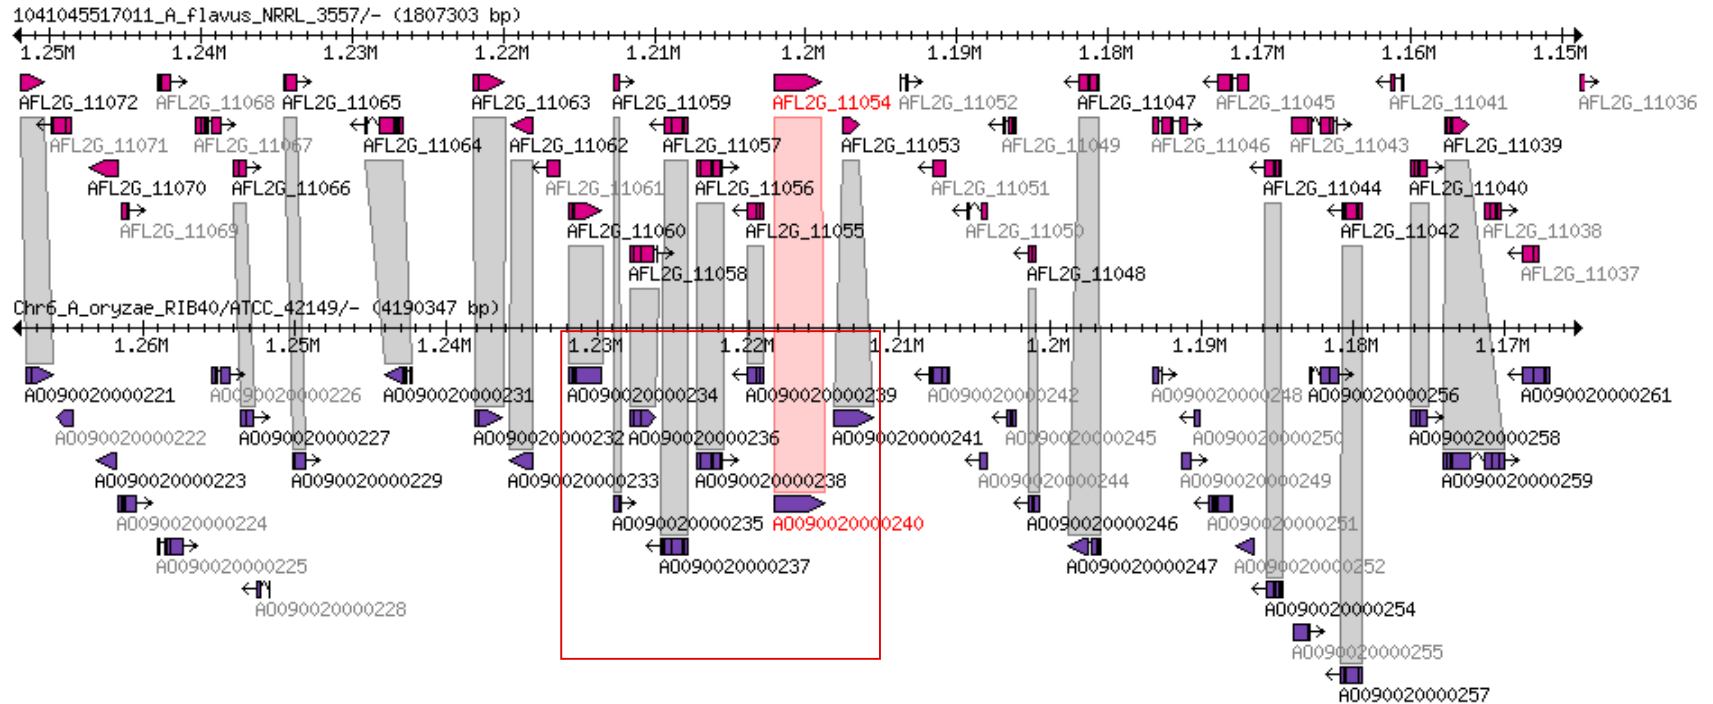



**AO090020000240 cluster**

| Gene id (SMURF)       | Gene positions | Gene distance | Gene Name | Annotated_gene_function                                                                                                                                                                                                    | antiSMASH ID | AspGD ID       |
|-----------------------|----------------|---------------|-----------|----------------------------------------------------------------------------------------------------------------------------------------------------------------------------------------------------------------------------|--------------|----------------|
| n/a                   |                |               |           | Domain(s) with predicted electron carrier activity, molybdenum ion binding, oxidoreductase activity and role in oxidation-reduction process                                                                                | prot_ID_554  | AO090020000232 |
| n/a                   |                |               |           | Domain(s) with predicted acid phosphatase activity                                                                                                                                                                         | prot_ID_79   | AO090020000233 |
| n/a                   |                |               |           | Domain(s) with predicted role in Mo-molybdopterin cofactor biosynthetic process                                                                                                                                            | prot_ID_466  | AO090020000234 |
| n/a                   |                |               |           | Domain(s) with predicted role in sulfur compound metabolic process                                                                                                                                                         | prot_ID_1170 | AO090020000235 |
| AO090020000236        | -4             | 357           |           | Domain(s) with predicted transmembrane transporter activity, role in transmembrane transport and integral to membrane localization                                                                                         | prot_ID_387  | AO090020000236 |
|                       |                |               |           | Domain(s) with predicted electron carrier activity, heme binding, iron ion binding, monooxygenase activity, oxidoreductase activity, acting on paired donors, with incorporation or reduction of molecular oxygen activity | prot_ID_980  | AO090020000237 |
| AO090020000237        | -3             | 679           |           |                                                                                                                                                                                                                            | prot_ID_980  | AO090020000237 |
| AO090020000238        | -2             | 1529          |           | Cytochrome P450 monooxygenase                                                                                                                                                                                              | prot_ID_117  | AO090020000238 |
| AO090020000239        | -1             | 685           |           | Domain(s) with predicted nucleotide binding activity                                                                                                                                                                       | prot_ID_797  | AO090020000239 |
| <b>AO090020000240</b> | 0              | 0             |           | Non-ribosomal peptide synthetase                                                                                                                                                                                           | prot_ID_628  | AO090020000240 |
| AO090020000241        | 1              | 1382          |           | Domain(s) with predicted nucleotide binding, oxidoreductase activity, zinc ion binding activity and role in oxidation-reduction process                                                                                    | prot_ID_87   | AO090020000241 |
| n/a                   |                |               |           | Protein of unknown function                                                                                                                                                                                                | prot_ID_1130 | AO090020000242 |
| n/a                   |                |               |           | Protein of unknown function                                                                                                                                                                                                | prot_ID_997  | AO090020000244 |
| n/a                   |                |               |           | Domain(s) with predicted carbohydrate binding activity                                                                                                                                                                     | prot_ID_605  | AO090020000245 |
| n/a                   |                |               |           | Domain(s) with predicted carbohydrate binding activity                                                                                                                                                                     | prot_ID_208  | AO090020000246 |
| n/a                   |                |               |           | Ortholog of A. flavus NRRL 3357 : AFL2T_11047                                                                                                                                                                              | prot_ID_434  | AO090020000247 |

## AO090020000380 cluster

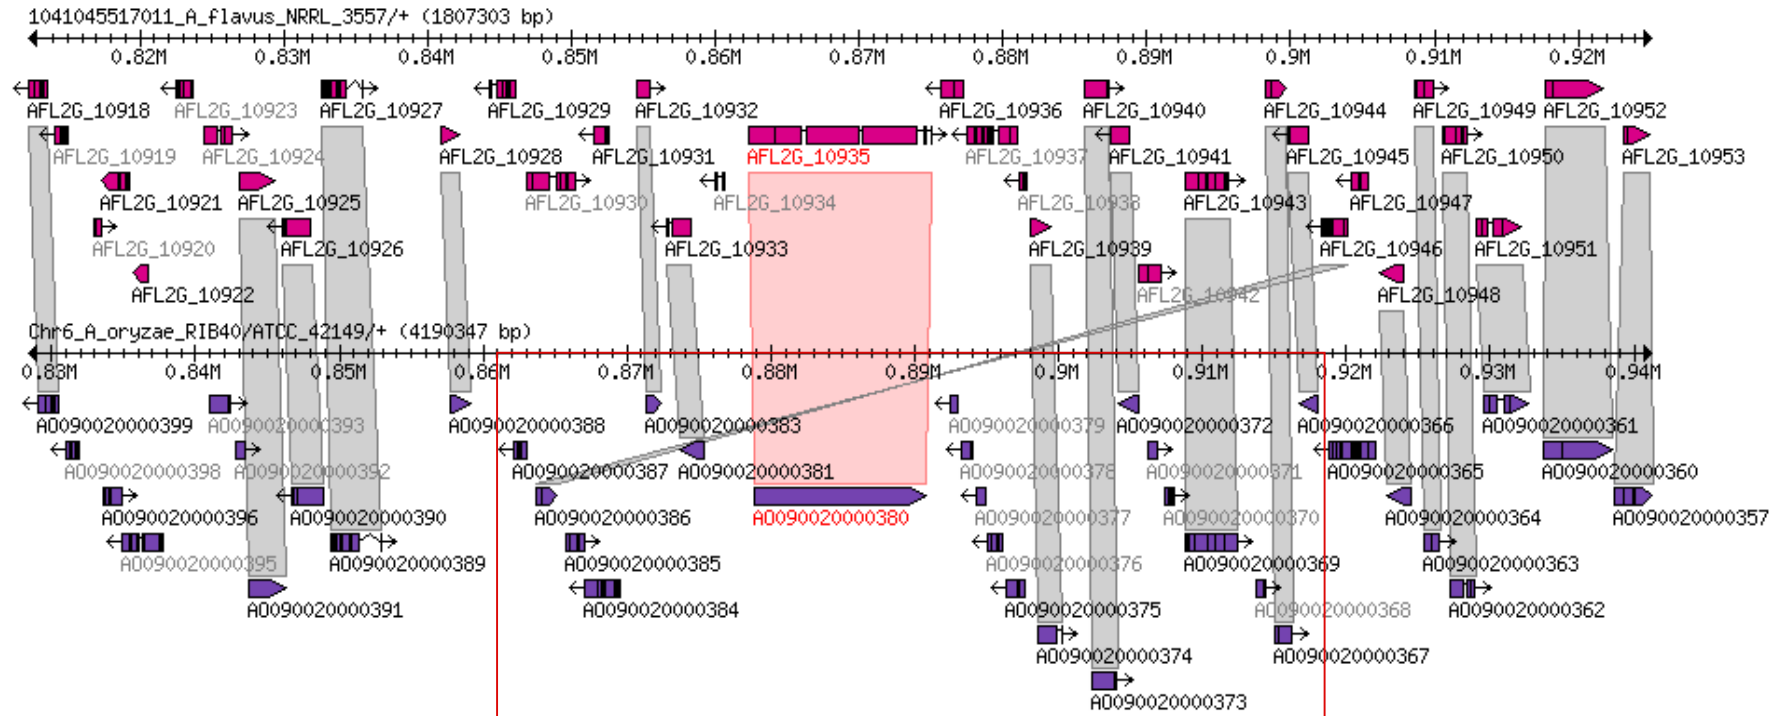

**AO090020000380 cluster**

| Gene id (SMURF)       | Gene positions | Gene distance | Gene Name | Annotated_gene_function                                                                                                                                                                                                             | antiSMASH ID | AspGD ID               |
|-----------------------|----------------|---------------|-----------|-------------------------------------------------------------------------------------------------------------------------------------------------------------------------------------------------------------------------------------|--------------|------------------------|
| n/a                   |                |               |           | Domain(s) with predicted monooxygenase activity and role in oxidation-reduction process                                                                                                                                             |              | AO090020000366 ECS, FA |
| n/a                   |                |               |           | Transmembrane transporter                                                                                                                                                                                                           | n/a          | AO090020000367         |
| n/a                   |                |               |           | Protein of unknown function                                                                                                                                                                                                         | n/a          | AO090020000368         |
| n/a                   |                |               |           | Domain(s) with predicted FMN binding, NADPH-hemoprotein reductase activity, aromatase activity, electron carrier activity, heme binding, iron ion binding activity and role in oxidation-reduction process                          | prot_ID_912  | AO090020000369         |
| n/a                   |                |               |           | Protein of unknown function                                                                                                                                                                                                         | prot_ID_252  | AO090020000370         |
| n/a                   |                |               |           | domain(s) with predicted oxidoreductase activity and role in oxidation-reduction process                                                                                                                                            | prot_ID_582  | AO090020000371         |
| n/a                   |                |               |           | Domain(s) with predicted aldehyde dehydrogenase [NAD(P)+] activity and role in cellular aldehyde metabolic process, oxidation-reduction process                                                                                     | prot_ID_126  | AO090020000372         |
| n/a                   |                |               |           | Domain(s) with predicted carbon-nitrogen ligase activity, with glutamine as amido-N-donor, hydrolase activity, acting on carbon-nitrogen (but not peptide) bonds, in linear amides activity                                         | prot_ID_1002 | AO090020000373         |
| n/a                   |                |               |           | Ortholog of <i>A. flavus</i> NRRL 3357 : AFL2T_10939                                                                                                                                                                                | prot_ID_583  | AO090020000374         |
| n/a                   |                |               |           | Domain(s) with predicted glutamate-1-semialdehyde 2,1-aminomutase activity, pyridoxal phosphate binding, transaminase activity and role in tetrapyrrole biosynthetic process                                                        | prot_ID_795  | AO090020000375         |
| n/a                   |                |               |           | Protein of unknown function                                                                                                                                                                                                         | prot_ID_468  | AO090020000376         |
| n/a                   |                |               |           | Protein of unknown function                                                                                                                                                                                                         | prot_ID_260  | AO090020000377         |
| n/a                   |                |               |           | Domain(s) with predicted oxidoreductase activity and role in oxidation-reduction process                                                                                                                                            | prot_ID_794  | AO090020000378         |
| n/a                   |                |               |           | Protein of unknown function                                                                                                                                                                                                         | prot_ID_1150 | AO090020000379         |
| <b>AO090020000380</b> | 0              | 0             |           | Non-ribosomal peptide synthetase                                                                                                                                                                                                    | prot_ID_508  | AO090020000380         |
| AO090020000381        | 1              | 3604          |           | Domain(s) with predicted nucleotide binding, oxidoreductase activity and role in oxidation-reduction process                                                                                                                        | prot_ID_768  | AO090020000381         |
| AO090020000383        | 2              | 1492          |           | Domain(s) with predicted catalytic activity, coenzyme binding, nucleotide binding activity and role in cellular metabolic process                                                                                                   | prot_ID_791  | AO090020000383         |
| AO090020000384        | 3              | 1959          |           | Domain(s) with predicted DNA binding, sequence-specific DNA binding RNA polymerase II transcription factor activity, zinc ion binding activity and role in regulation of transcription, DNA-dependent, transcription, DNA-dependent | prot_ID_241  | AO090020000384         |
| AO090020000385        | 4              | 73            |           | Ortholog(s) have nitrilase activity and role in cyanide catabolic process                                                                                                                                                           | prot_ID_352  | AO090020000385         |
| AO090020000386        | 5              | 593           |           | Domain(s) with predicted role in transmembrane transport and integral to membrane localization                                                                                                                                      | prot_ID_883  | AO090020000386         |

n/a  
n/a

Domain(s) with predicted hydrolase activity, acting on carbon-nitrogen  
(but not peptide) bonds activity and role in nitrogen compound metabolic  
process

Ortholog of A. flavus NRRL 3357 : AFL2T\_10928

prot\_ID\_528 AO090020000387 IGD, FA  
prot\_ID\_1067 AO090020000388

## AO9002000527 cluster

No manual prediction made

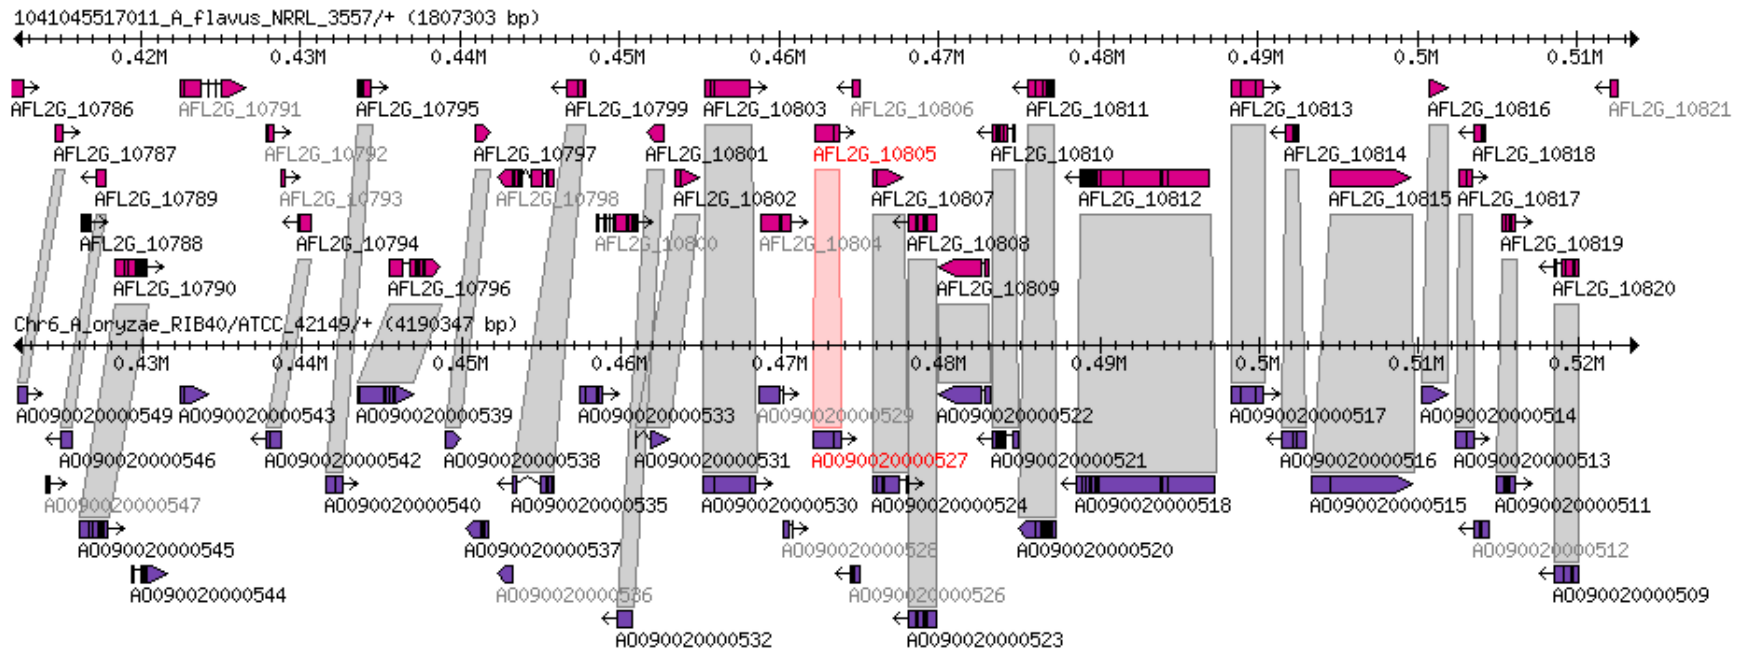

**AO090020000527 cluster**

| Gene id (SMURF)       | Gene positions | Gene distance | Gene Name | Annotated_gene_function                                                                                                                                                                                                         | antiSMASH ID | AspGD ID       |
|-----------------------|----------------|---------------|-----------|---------------------------------------------------------------------------------------------------------------------------------------------------------------------------------------------------------------------------------|--------------|----------------|
| AO090020000515        | -10            | 1978          |           | Ortholog(s) have bile acid-exporting ATPase activity, role in bile acid and bile salt transport and fungal-type vacuole localization                                                                                            | n/a          | AO090020000515 |
| AO090020000516        | -9             | 1563          |           | Ortholog(s) have protein homodimerization activity, ubiquitin-protein ligase activity                                                                                                                                           | n/a          | AO090020000516 |
| AO090020000517        | -8             | 1597          |           | Ortholog(s) have serine-type endopeptidase activity, role in asexual sporulation resulting in formation of a cellular spore, cellular response to starvation, vacuolar protein catabolic process and intracellular localization | n/a          | AO090020000517 |
| AO090020000518        | -7             | 1803          |           | Ortholog(s) have role in fungal-type cell wall organization, intracellular protein transport, response to pH and cytosol, extrinsic to membrane, mitochondrion localization                                                     | n/a          | AO090020000518 |
| AO090020000520        | -6             | 1097          |           | Ortholog(s) have sedoheptulose-7-phosphate:D-glyceraldehyde-3-phosphate glyceronetransferase activity, role in pentose-phosphate shunt and nucleus localization                                                                 | n/a          | AO090020000520 |
| AO090020000521        | -5             | 605           |           | Ortholog(s) have superoxide dismutase activity                                                                                                                                                                                  | prot_ID_923  | AO090020000521 |
| AO090020000522        | -4             | 598           |           | Transcriptional coactivator p100                                                                                                                                                                                                | prot_ID_481  | AO090020000522 |
| AO090020000523        | -3             | 51            |           | Ortholog of A. nidulans FGSC A4 : AN0243, A. fumigatus Af293 : Afu5g09260, A. niger CBS 513.88 : An07g03750, A. niger ATCC 1015 : 48464-mRNA and A. versicolor : Aspve1_0078024                                                 | prot_ID_1034 | AO090020000523 |
| AO090020000524        | -2             | 868           |           | Domain(s) with predicted transporter activity, role in oligopeptide transport and membrane localization                                                                                                                         | prot_ID_630  | AO090020000524 |
| AO090020000526        | -1             | 860           |           | Protein of unknown function                                                                                                                                                                                                     | prot_ID_46   | AO090020000526 |
| <b>AO090020000527</b> | 0              | 0             |           | Ortholog(s) have dimethylallyltransferase activity, peptidase activity, tryptophan dimethylallyltransferase activity and role in ergot alkaloid biosynthetic process, protein prenylation, shamixanthone biosynthetic process   | prot_ID_606  | AO090020000527 |
| AO090020000528        | 1              | 1422          |           | Protein of unknown function                                                                                                                                                                                                     | prot_ID_188  | AO090020000528 |
| AO090020000529        | 2              | 17            |           | <b>Domain(s) with predicted catalytic activity and role in nucleoside metabolic process</b>                                                                                                                                     | prot_ID_717  | AO090020000529 |
| AO090020000530        | 3              | 612           |           | Ortholog(s) have role in protein folding in endoplasmic reticulum and ER membrane protein complex localization                                                                                                                  | prot_ID_325  | AO090020000530 |
| AO090020000531        | 4              | 2269          |           | Ortholog of A. nidulans FGSC A4 : AN4729, A. fumigatus Af293 : Afu5g09280, A. niger CBS 513.88 : An07g03730, An14g07330, A. oryzae RIB40 : AO090023000535 and A. niger ATCC 1015 : 180084-mRNA                                  | prot_ID_1230 | AO090020000531 |

|                |   |      |                                                                                                              |     |                |
|----------------|---|------|--------------------------------------------------------------------------------------------------------------|-----|----------------|
| AO090020000532 | 5 | 135  | Ortholog of <i>A. flavus</i> NRRL 3357 : AFL2T_10801                                                         | n/a | AO090020000532 |
| AO090020000533 | 6 | 814  | Ortholog of <i>Aspergillus aculeatus</i> ATCC16872 : Aacu16872_023734                                        | n/a | AO090020000533 |
| AO090020000535 | 7 | 1750 | Domain(s) with predicted nucleotide binding, oxidoreductase activity and role in oxidation-reduction process | n/a | AO090020000535 |

## A09002300082 cluster

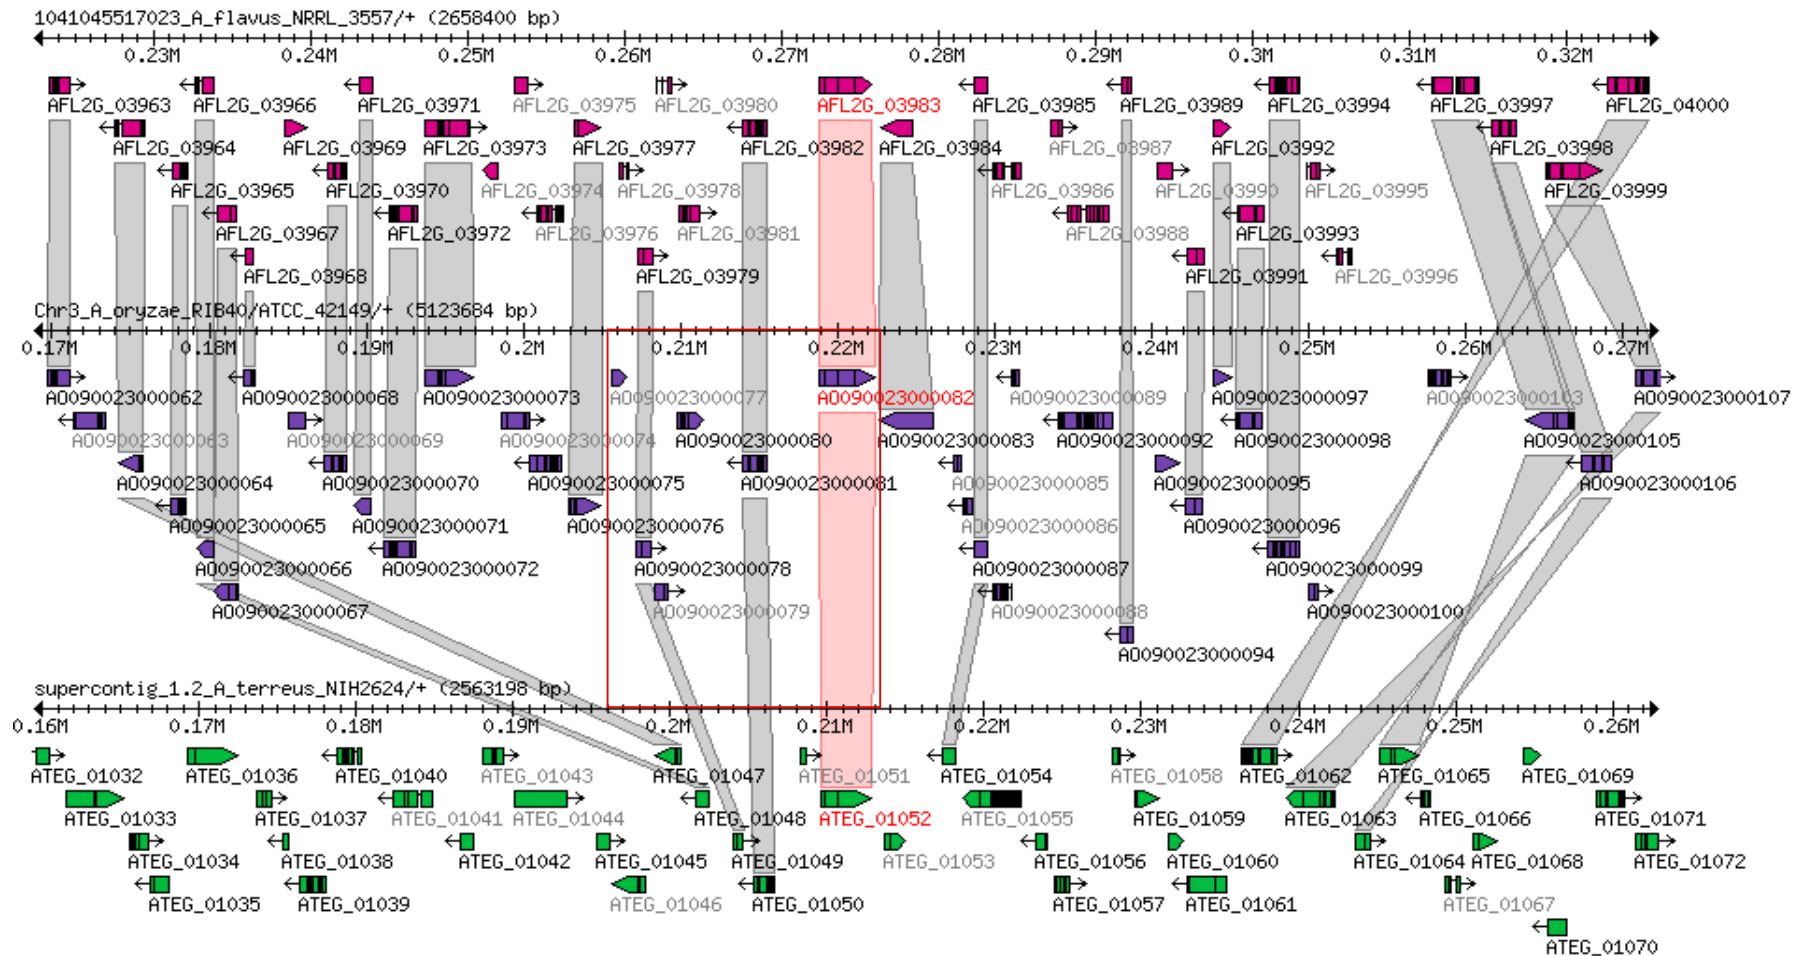



**AO090023000082 cluster**

| Gene id (SMURF)       | Gene positions | Gene distance | Gene Name | Annotated_gene_function                                                                                                                                                                        | antiSMASH ID | AspGD ID       |     |
|-----------------------|----------------|---------------|-----------|------------------------------------------------------------------------------------------------------------------------------------------------------------------------------------------------|--------------|----------------|-----|
| AO090023000097        | -11            | 792           |           | Domain(s) with predicted hydrolase activity                                                                                                                                                    | n/a          | AO090023000097 |     |
| AO090023000096        | -10            | 369           |           | Domain(s) with predicted catalytic activity, coenzyme binding, nucleotide binding activity and role in cellular metabolic process                                                              | prot_ID_689  | AO090023000096 |     |
| AO090023000095        | -9             | 1677          |           | Domain(s) with predicted carbohydrate binding, catalytic activity and role in carbohydrate catabolic process                                                                                   | prot_ID_1380 | AO090023000095 |     |
| AO090023000094        | -8             | 889           |           | Ortholog of <i>A. fumigatus</i> Af293 : Afu3g00550, <i>N. fischeri</i> NRRL 181 : NFIA_001160, NFIA_095350, <i>A. flavus</i> NRRL 3357 : AFL2T_03989 and <i>A. versicolor</i> : Aspve1_0148566 | prot_ID_473  | AO090023000094 |     |
| AO090023000092        | -7             | 2993          |           | Domain(s) with predicted role in transmembrane transport                                                                                                                                       | prot_ID_1185 | AO090023000092 |     |
| AO090023000089        | -6             | 61            |           | Protein of unknown function                                                                                                                                                                    | prot_ID_775  | AO090023000089 |     |
| AO090023000088        | -5             | 447           |           | Protein of unknown function                                                                                                                                                                    | prot_ID_1312 | AO090023000088 |     |
| AO090023000087        | -4             | 78            |           | Domain(s) with predicted nucleotide binding, oxidoreductase activity and role in oxidation-reduction process                                                                                   | prot_ID_1376 | AO090023000087 |     |
| AO090023000086        | -3             | 141           |           | Domain(s) with predicted catalytic activity and role in metabolic process                                                                                                                      | prot_ID_1072 | AO090023000086 |     |
| AO090023000085        | -2             | 2654          |           | Protein of unknown function                                                                                                                                                                    | prot_ID_324  | AO090023000085 |     |
| AO090023000083        | -1             | 568           |           | Ortholog(s) have glucan endo-1,3-beta-glucanase activity, C-3 substituted reducing group, licheninase activity and role in glucan catabolic process                                            | prot_ID_1500 | AO090023000083 |     |
| <b>AO090023000082</b> | 0              | 0             |           | <b>Protein similar to nonribosomal peptide synthases (NRPS-like)</b>                                                                                                                           | prot_ID_598  | AO090023000082 | ECS |
| AO090023000081        | 1              | 3375          |           | <b>Domain(s) with predicted O-methyltransferase activity</b>                                                                                                                                   | prot_ID_1289 | AO090023000081 |     |
| AO090023000080        | 2              | 2487          |           | Ortholog of <i>A. niger</i> CBS 513.88 : An09g05120, An12g06560, <i>A. versicolor</i> : Aspve1_0192318, <i>A. sydowii</i> : Aspsy1_1169784 and <i>A. terreus</i> NIH2624 : ATET_02475          | prot_ID_566  | AO090023000080 |     |
| AO090023000079        | 3              | 516           |           | Protein of unknown function                                                                                                                                                                    | prot_ID_707  | AO090023000079 |     |
| AO090023000078        | 4              | 878           |           | Ortholog(s) have intracellular localization                                                                                                                                                    | prot_ID_1415 | AO090023000078 |     |
| AO090023000077        | 5              | 715           |           | <b>Domain(s) with predicted N-acetyltransferase activity and role in metabolic process</b>                                                                                                     | prot_ID_321  | AO090023000077 | FA  |
| AO090023000076        | 6              | 1062          |           | Domain(s) with predicted beta-galactosidase activity, cation binding activity, role in carbohydrate metabolic process and beta-galactosidase complex localization                              | prot_ID_1011 | AO090023000076 |     |
| AO090023000075        | 7              | 695           |           | Domain(s) with predicted substrate-specific transmembrane transporter activity, role in transmembrane transport and integral to membrane localization                                          | prot_ID_1406 | AO090023000075 |     |
| AO090023000074        | 8              | 26            |           | Domain(s) with predicted DNA binding, zinc ion binding activity, role in transcription, DNA-dependent and nucleus localization                                                                 | prot_ID_471  | AO090023000074 |     |

|                |    |      |                                                                                                                                                                                                                            |     |                |
|----------------|----|------|----------------------------------------------------------------------------------------------------------------------------------------------------------------------------------------------------------------------------|-----|----------------|
| AO090023000073 | 9  | 2580 | Ortholog of <i>A. nidulans</i> FGSC A4 : AN1594, AN9314, <i>A. fumigatus</i> Af293 : Afu5g15060, <i>A. niger</i> CBS 513.88 : An18g02710, <i>A. niger</i> ATCC 1015 : 54123-mRNA and <i>A. versicolor</i> : Aspve1_0137870 | n/a | AO090023000073 |
| AO090023000072 | 10 | 684  | Cytochrome P450 monooxygenase                                                                                                                                                                                              | n/a | AO090023000072 |

## A0090023000444 cluster

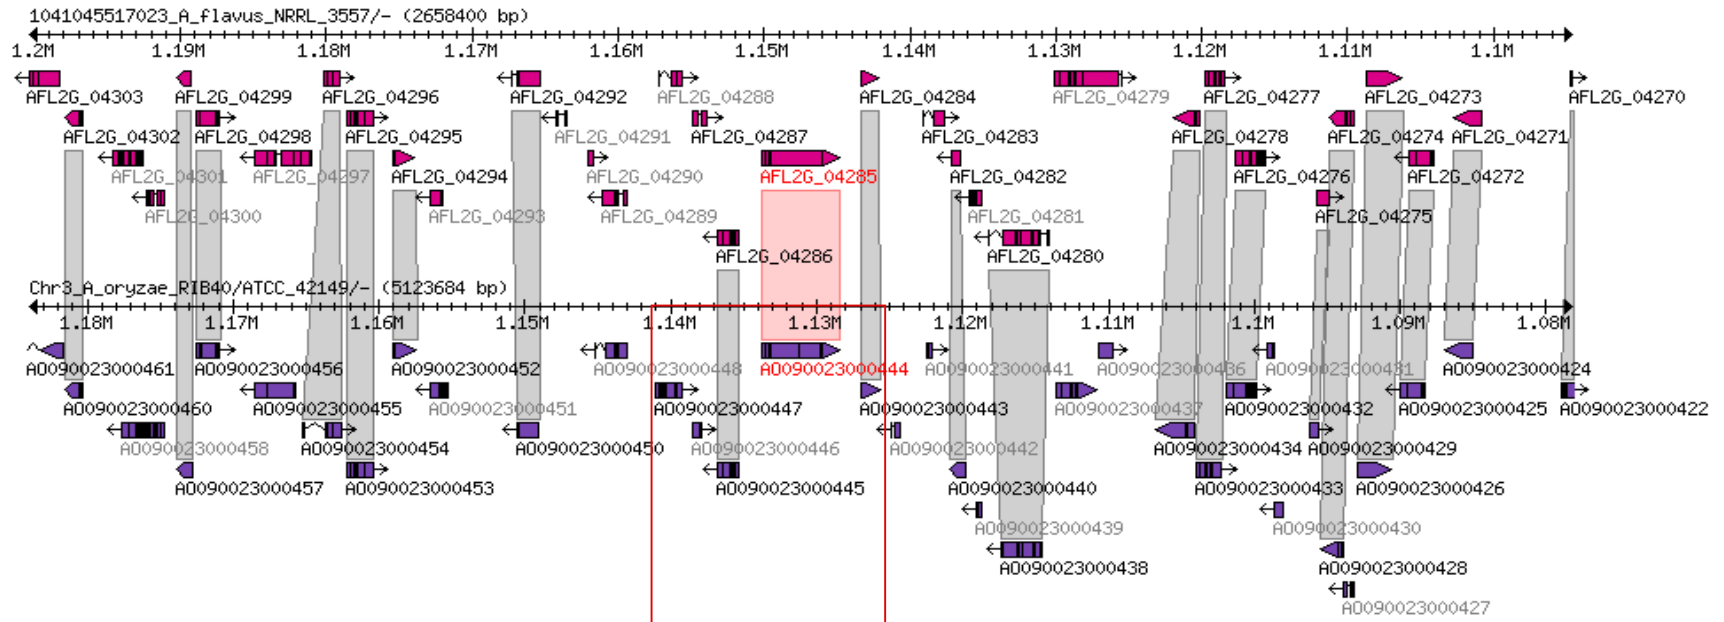

**AO090023000444 cluster**

| Gene id (SMURF)       | Gene positions | Gene distance | Gene Name | Annotated_gene_function                                                                                                                                                                 | antiSMASH ID | AspGD ID           |
|-----------------------|----------------|---------------|-----------|-----------------------------------------------------------------------------------------------------------------------------------------------------------------------------------------|--------------|--------------------|
| AO090023000450        | -5             | 3765          |           | Cytochrome P450 monooxygenase; upregulated by exposure to benomyl                                                                                                                       | prot_ID_184  | AO090023000450     |
| AO090023000448        | -4             | 1955          |           | Domain(s) with predicted acid phosphatase activity                                                                                                                                      | prot_ID_1017 | AO090023000448     |
| AO090023000447        | -3             | 611           |           | Cytochrome P450 monooxygenase<br>Domain(s) with predicted methyltransferase activity and role in metabolic process                                                                      | prot_ID_702  | AO090023000447 FA  |
| AO090023000446        | -2             | 1061          |           |                                                                                                                                                                                         | prot_ID_1439 | AO090023000446     |
| AO090023000445        | -1             | 1529          |           | Domain(s) with predicted O-methyltransferase activity                                                                                                                                   | prot_ID_467  | AO090023000445     |
| <b>AO090023000444</b> | 0              | 0             |           | Polyketide synthase                                                                                                                                                                     | prot_ID_1264 | AO090023000444     |
| n/a                   |                |               |           | Ortholog(s) have intracellular localization                                                                                                                                             | prot_ID_1099 | AO090023000443 ECS |
| n/a                   |                |               |           | Domain(s) with predicted catalytic activity, pyridoxal phosphate binding activity                                                                                                       | prot_ID_1373 | AO090023000442     |
| n/a                   |                |               |           | Protein of unknown function                                                                                                                                                             | prot_ID_816  | AO090023000441     |
| n/a                   |                |               |           | Ortholog of A. fumigatus Af293 : Afu2g00980, N. fischeri NRRL 181 : NFIA_033290, A. flavus NRRL 3357 : AFL2T_04282, A. clavatus NRRL 1 : ACLA_003690 and A. versicolor : Aspve1_0043932 | prot_ID_388  | AO090023000440     |
| n/a                   |                |               |           | Protein of unknown function                                                                                                                                                             | prot_ID_212  | AO090023000439     |
| n/a                   |                |               |           | Domain(s) with predicted serine-type peptidase activity and role in proteolysis                                                                                                         | prot_ID_1119 | AO090023000438     |
| n/a                   |                |               |           | Protein of unknown function                                                                                                                                                             | prot_ID_24   | AO090023000437     |
| n/a                   |                |               |           | Protein of unknown function                                                                                                                                                             | prot_ID_946  | AO090023000436     |

# AO090023000528 cluster

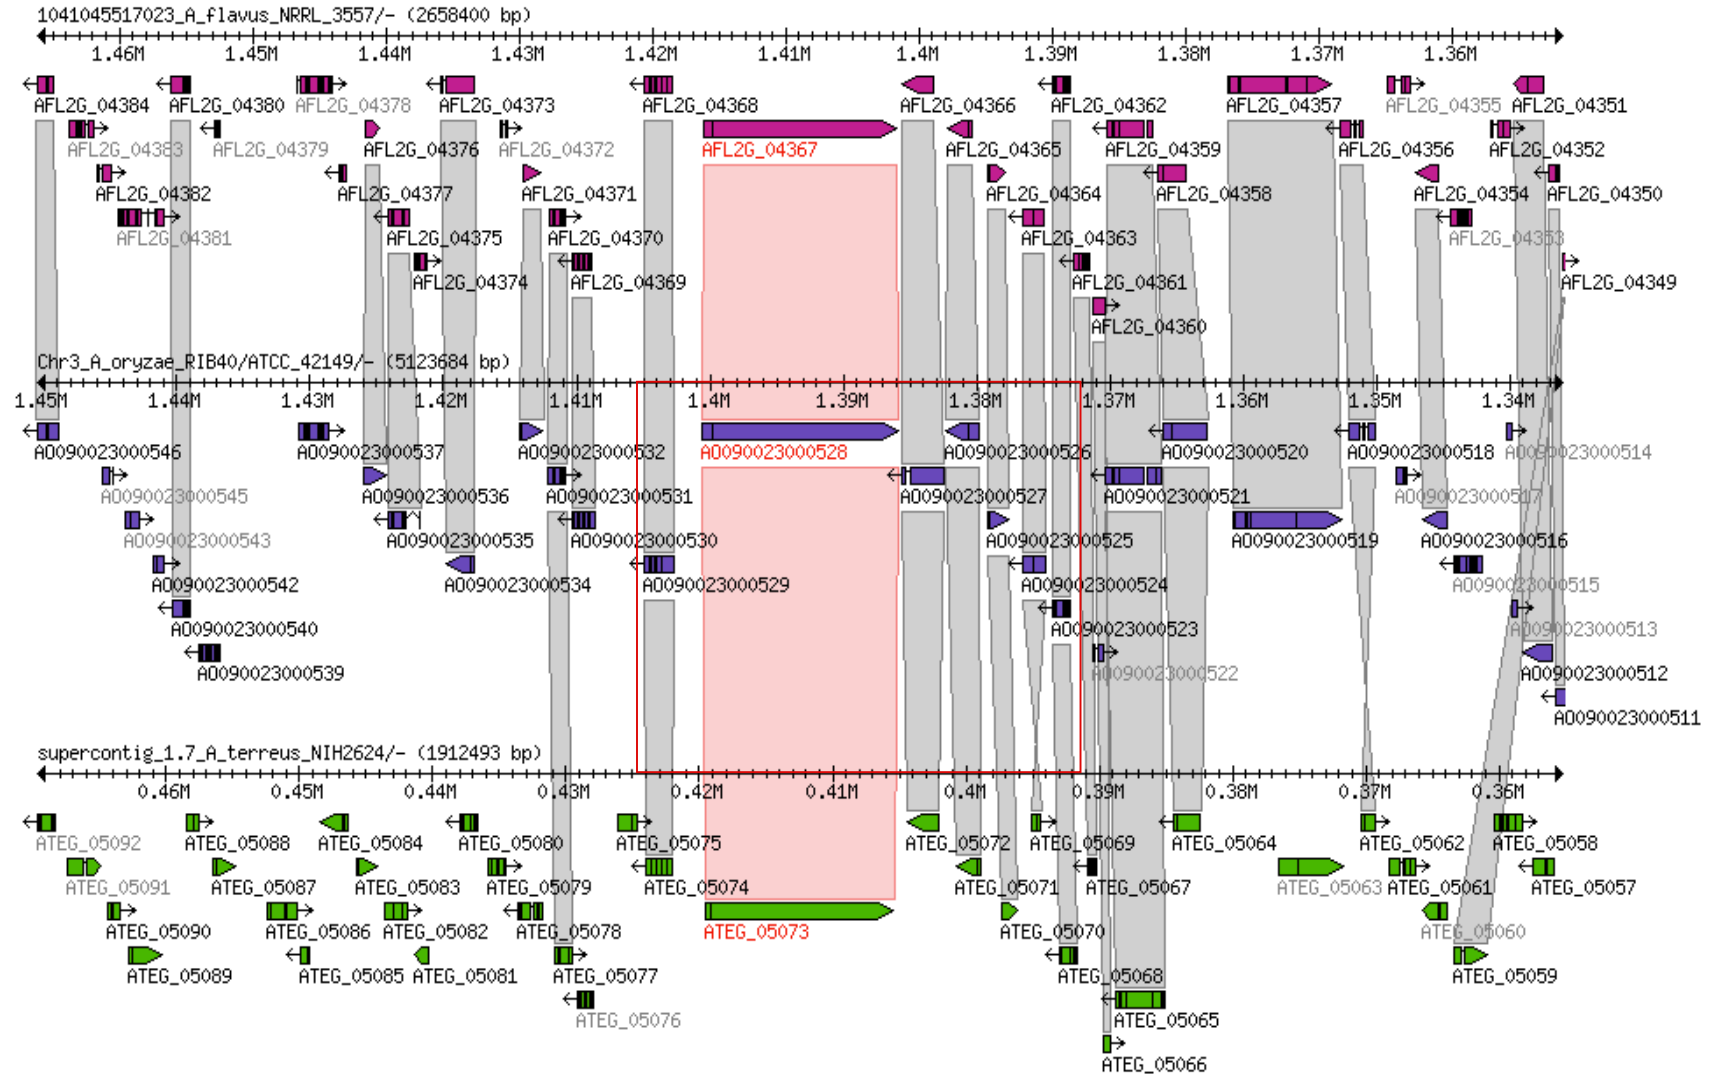

**AO090023000528 cluster**

| Gene id (SMURF)       | Gene positions | Gene distance | Gene Name | Annotated_gene_function                                                                                                                                                                               | antiSMASH ID | AspGD ID       |          |
|-----------------------|----------------|---------------|-----------|-------------------------------------------------------------------------------------------------------------------------------------------------------------------------------------------------------|--------------|----------------|----------|
| n/a                   |                |               |           | Ortholog(s) have zinc ion transmembrane transporter activity and role in response to zinc ion, zinc ion transmembrane transport                                                                       | prot_ID_710  | AO090023000536 |          |
| n/a                   |                |               |           | Ortholog of A. nidulans FGSC A4 : AN4729, A. fumigatus Af293 : Afu5g09280, A. niger CBS 513.88 : An07g03730, An14g07330, A. oryzae RIB40 : AO090020000531 and A. niger ATCC 1015 : 180084-mRNA        | prot_ID_1249 | AO090023000535 |          |
| n/a                   |                |               |           | Domain(s) with predicted peptidase activity and role in proteolysis                                                                                                                                   | prot_ID_533  | AO090023000534 |          |
| n/a                   |                |               |           | Ortholog of A. nidulans FGSC A4 : AN1604/agnE, A. fumigatus Af293 : Afu1g00650, Afu7g08510, Afu8g06030, A. niger CBS 513.88 : An08g09610/agnD, An15g04760 and A. oryzae RIB40 : AO090005000538        | prot_ID_717  | AO090023000532 |          |
| n/a                   |                |               |           | Domain(s) with predicted oxidoreductase activity and role in oxidation-reduction process                                                                                                              | prot_ID_376  | AO090023000531 |          |
| n/a                   |                |               |           | Domain(s) with predicted flavin adenine dinucleotide binding, oxidoreductase activity and role in oxidation-reduction process                                                                         | prot_ID_889  | AO090023000530 |          |
| n/a                   |                |               |           | Ortholog(s) have role in N',N'',N'''-triacetylfusarinine C biosynthetic process, cellular response to hydrogen peroxide, cellular response to iron ion starvation and ergosterol biosynthetic process | prot_ID_15   | AO090023000529 | ECS, IGD |
| <b>AO090023000528</b> | 0              | 0             |           | <b>Putative nonribosomal peptide synthase (NRPS)</b>                                                                                                                                                  | prot_ID_901  | AO090023000528 |          |
| AO090023000527        | 1              | 461           |           | Ortholog of A. nidulans FGSC A4 : AN0605, A. fumigatus Af293 : Afu6g10890, A. niger CBS 513.88 : An09g02900, A. niger ATCC 1015 : 54387-mRNA and A. terreus NIH2624 : ATET_05072                      | prot_ID_680  | AO090023000527 |          |
| AO090023000526        | 2              | 1021          |           | Domain(s) with predicted endonuclease activity and role in nucleotide-excision repair, response to UV                                                                                                 | prot_ID_1624 | AO090023000526 |          |
| AO090023000525        | 3              | 1002          |           | Ortholog of A. nidulans FGSC A4 : AN0602, A. niger CBS 513.88 : An15g02350, A. niger ATCC 1015 : 48700-mRNA, A. versicolor : Aspve1_0146150 and A. sydowii : Aspsy1_0055411                           | prot_ID_1    | AO090023000525 |          |
| AO090023000524        | 4              | 1783          |           | Ortholog of A. nidulans FGSC A4 : AN0600, A. fumigatus Af293 : Afu6g10940, A. niger CBS 513.88 : An06g01260, A. niger ATCC 1015 : 52539-mRNA and A. versicolor : Aspve1_0058576                       | prot_ID_932  | AO090023000524 |          |
| AO090023000523        | 5              | 1021          |           | Ortholog(s) have (R,R)-butanediol dehydrogenase activity, role in alcohol metabolic process, butanediol biosynthetic process and cytoplasm, nucleus localization                                      | prot_ID_1349 | AO090023000523 | ECS      |
| n/a                   |                |               |           | Protein of unknown function                                                                                                                                                                           | prot_ID_1046 | AO090023000522 |          |

|     |                                                                                                                                   |              |                |
|-----|-----------------------------------------------------------------------------------------------------------------------------------|--------------|----------------|
| n/a | Damage-specific DNA binding complex, subunit DDB1                                                                                 | prot_ID_1285 | AO090023000521 |
| n/a | Ortholog(s) have electron carrier activity, role in ergosterol biosynthetic process and mitochondrial outer membrane localization | n/a          | AO090023000520 |

## A0090023000877 cluster

No manual prediction made

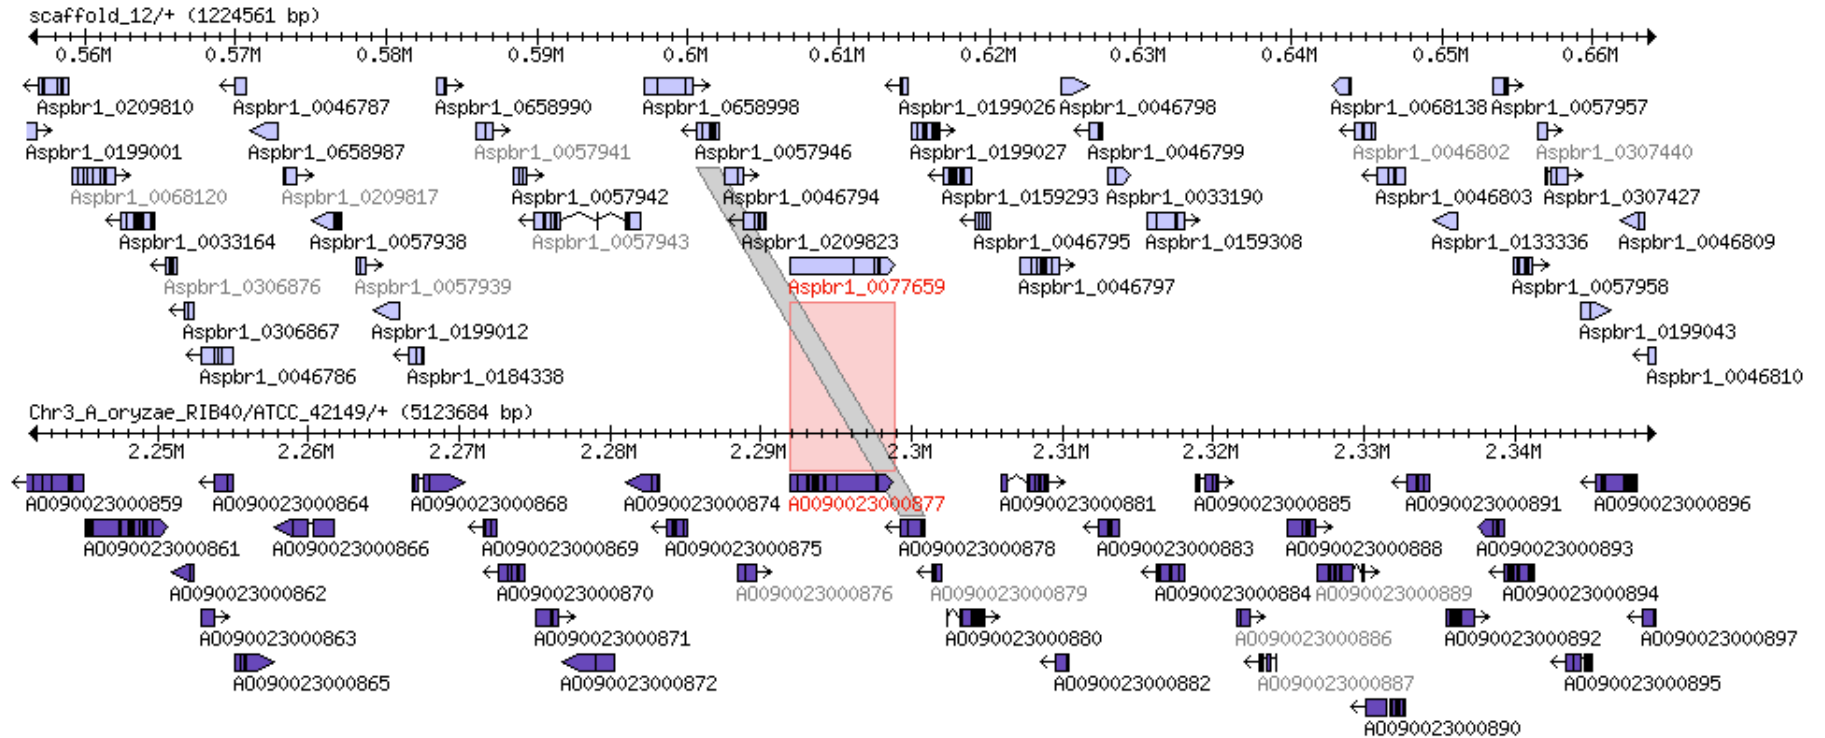



**AO090023000877 cluster**

| Gene id (SMURF)       | Gene positions | Gene distance | Gene Name | Annotated_gene_function                                                                                                                                                                                             | antiSMASH ID | AspGD ID       |
|-----------------------|----------------|---------------|-----------|---------------------------------------------------------------------------------------------------------------------------------------------------------------------------------------------------------------------|--------------|----------------|
| n/a                   |                |               |           | Domain(s) with predicted FMN binding, heme binding, oxidoreductase activity and role in oxidation-reduction process                                                                                                 | prot_ID_1491 | AO090023000884 |
| n/a                   |                |               |           | Domain(s) with predicted nucleic acid binding activity                                                                                                                                                              | prot_ID_174  | AO090023000883 |
| n/a                   |                |               |           | Protein of unknown function                                                                                                                                                                                         | prot_ID_1283 | AO090023000882 |
| AO090023000881        | -4             | 1150          |           | Domain(s) with predicted role in transmembrane transport and integral to membrane localization                                                                                                                      | prot_ID_634  | AO090023000881 |
| AO090023000880        | -3             | 350           |           | Domain(s) with predicted monooxygenase activity and role in oxidation-reduction process                                                                                                                             | prot_ID_1350 | AO090023000880 |
| AO090023000879        | -2             | 580           |           | Protein of unknown function                                                                                                                                                                                         | prot_ID_909  | AO090023000879 |
| AO090023000878        | -1             | 509           |           | Domain(s) with predicted O-methyltransferase activity                                                                                                                                                               | prot_ID_222  | AO090023000878 |
| <b>AO090023000877</b> | 0              | 0             |           | Polyketide synthase                                                                                                                                                                                                 | prot_ID_1300 | AO090023000877 |
| AO090023000876        | 1              | 2157          |           | Domain(s) with predicted sequence-specific DNA binding RNA polymerase II transcription factor activity, zinc ion binding activity, role in regulation of transcription, DNA-dependent and nucleus localization      | prot_ID_1410 | AO090023000876 |
| AO090023000875        | 2              | 3713          |           | Domain(s) with predicted nucleotide binding, oxidoreductase activity and role in oxidation-reduction process                                                                                                        | prot_ID_678  | AO090023000875 |
| n/a                   |                |               |           | Tryptophan synthase, beta chain                                                                                                                                                                                     | prot_ID_1540 | AO090023000874 |
| n/a                   |                |               |           | Aspartic-type endopeptidase                                                                                                                                                                                         | prot_ID_915  | AO090023000872 |
| n/a                   |                |               |           | Domain(s) with predicted FMN binding, oxidoreductase activity and role in oxidation-reduction process                                                                                                               | prot_ID_250  | AO090023000871 |
| n/a                   |                |               |           | Ortholog of <i>A. nidulans</i> FGSC A4 : AN10552, <i>A. fumigatus</i> Af293 : Afu4g07060, <i>A. niger</i> CBS 513.88 : An04g01460, <i>A. niger</i> ATCC 1015 : 44254-mRNA and <i>A. versicolor</i> : Aspve1_0085132 | prot_ID_1305 | AO090023000870 |
| n/a                   |                |               |           | Protein of unknown function                                                                                                                                                                                         | prot_ID_475  | AO090023000869 |

# AO09002600009 (afl) cluster

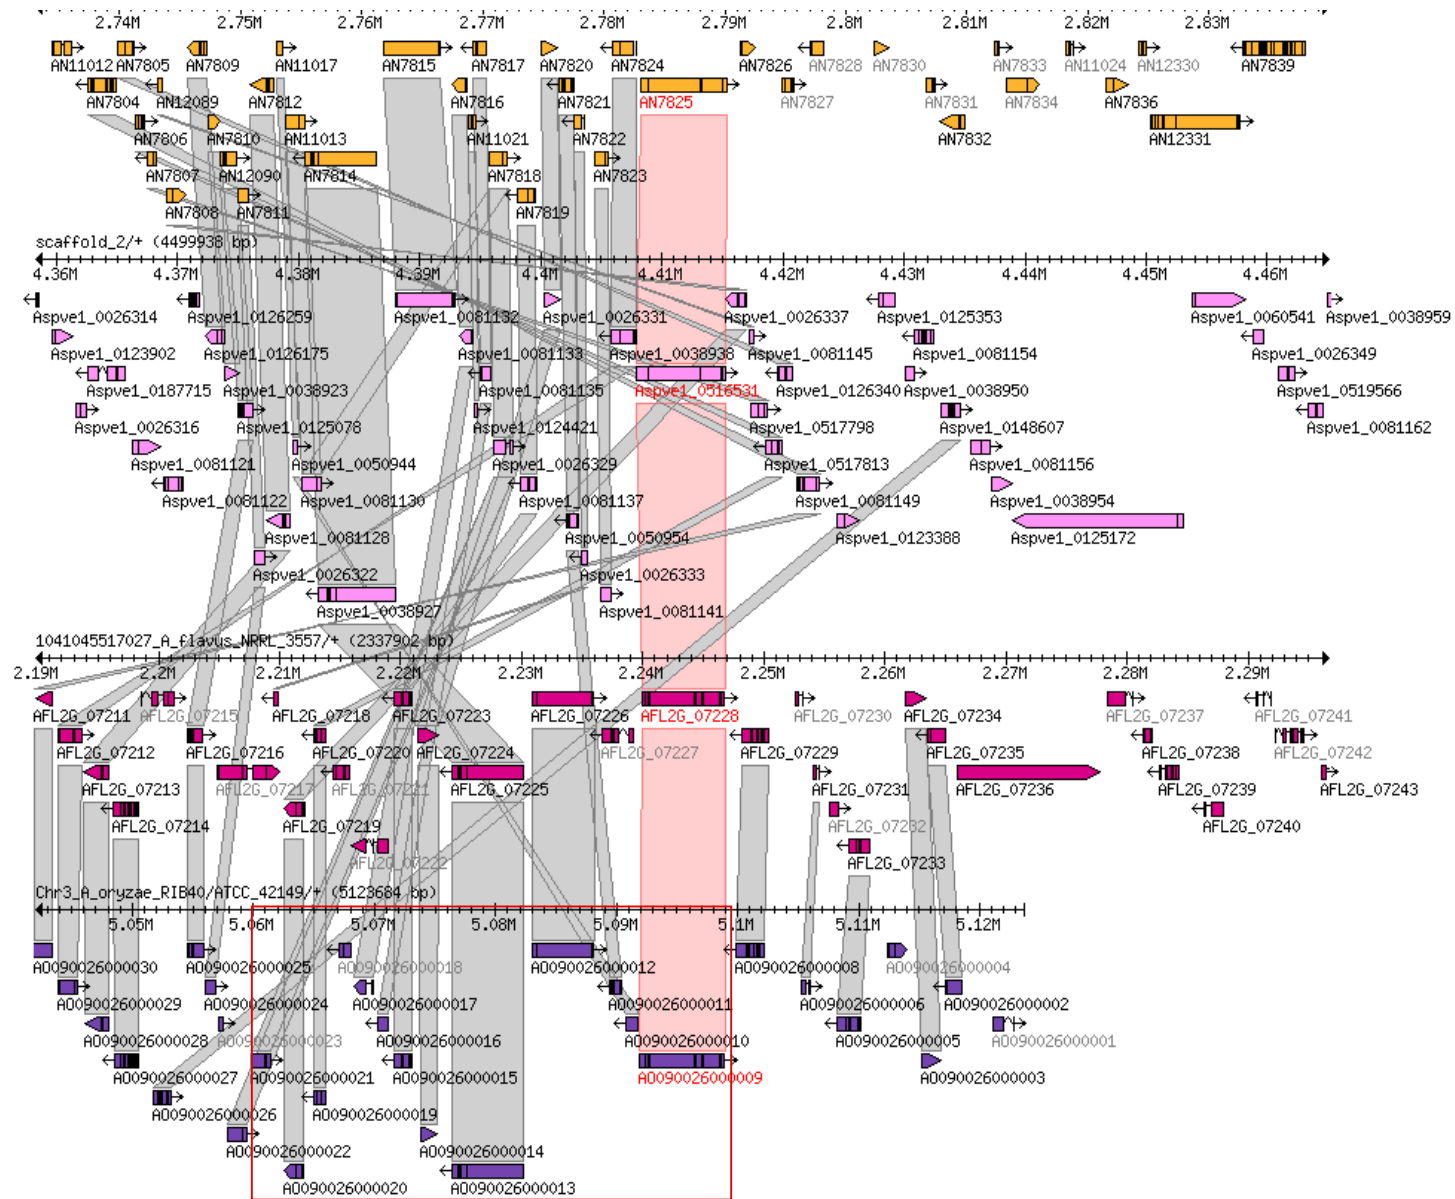

**AO09002600009 (afl) cluster**

| Gene id (SMURF)      | Gene positions | Gene distance | Gene Name      | Annotated_gene_function                                                                                                                                                                                                     | antiSMASH ID | AspGD ID         |
|----------------------|----------------|---------------|----------------|-----------------------------------------------------------------------------------------------------------------------------------------------------------------------------------------------------------------------------|--------------|------------------|
| n/a                  |                |               | cpaA           | Polyketide synthase-nonribosomal peptide synthetase (PKS-NRPS); required for the biosynthesis of cyclopiazonic acid in strain NBRC 4177, RIB40 does not produce cyclopiazonic acid due to a reported truncation in the gene | prot_ID_1035 | AO09002600001    |
| n/a                  |                |               | cpaD           | O-dimethylallyltransferase (DMAT); regiospecifically dimethylallylates cAATrp to form beta-cyclopiazonic acid                                                                                                               | prot_ID_339  | AO09002600002    |
| n/a                  |                |               |                | Domain(s) with predicted electron carrier activity, oxidoreductase activity and role in oxidation-reduction process                                                                                                         | prot_ID_561  | AO09002600003    |
| AO09002600004        | -4             | 2463          |                | Cytochrome P450 monooxygenase                                                                                                                                                                                               | prot_ID_1303 | AO09002600004    |
| AO09002600005        | -3             | 2341          |                | Domain(s) with predicted role in transmembrane transport and integral to membrane localization                                                                                                                              | prot_ID_1128 | AO09002600005    |
| AO09002600006        | -2             | 3237          |                | Ortholog of A. flavus NRRL 3357 : AFL2T_07231                                                                                                                                                                               | prot_ID_215  | AO09002600006    |
| AO09002600008        | -1             | 1341          |                | Domain(s) with predicted role in transmembrane transport and integral to membrane localization; adjacent to the aflatoxin biosynthesis gene cluster                                                                         | prot_ID_317  | AO09002600008    |
| <b>AO09002600009</b> | 0              | 0             | <b>pkxA</b>    | <b>Member of the aflatoxin biosynthesis gene cluster</b>                                                                                                                                                                    | prot_ID_1605 | AO09002600009 ED |
| AO09002600010        | 1              | 750           |                | Member of the aflatoxin biosynthesis gene cluster                                                                                                                                                                           | prot_ID_347  | AO09002600010    |
| AO09002600011        | 2              | 305           |                | Domain(s) with predicted nucleotide binding, oxidoreductase activity and role in oxidation-reduction process; member of the aflatoxin biosynthesis gene cluster                                                             | prot_ID_892  | AO09002600011    |
| AO09002600012        | 3              | 1315          | <b>fas2</b>    | Putative 3-oxoacyl-[acyl-carrier-protein] reductase (NADPH); member of the aflatoxin biosynthesis gene cluster                                                                                                              | prot_ID_183  | AO09002600012    |
| AO09002600013        | 4              | 690           | <b>fas1</b>    | Putative enoyl-[acyl-carrier-protein] reductase (NADH); member of the aflatoxin biosynthesis gene cluster                                                                                                                   | prot_ID_579  | AO09002600013    |
| AO09002600014        | 5              | 1279          | <b>aflR</b>    | Putative sequence-specific DNA binding transcription with a predicted role in aflatoxin biosynthesis; member of the aflatoxin biosynthesis gene cluster                                                                     | prot_ID_1053 | AO09002600014    |
| AO09002600015        | 6              | 740           | <b>aflJ</b>    | Member of the aflatoxin biosynthesis gene cluster                                                                                                                                                                           | prot_ID_368  | AO09002600015    |
| AO09002600016        | 7              | 562           | <b>adhA</b>    | Domain(s) with predicted nucleotide binding, oxidoreductase activity and role in oxidation-reduction process; member of the aflatoxin biosynthesis gene cluster                                                             | n/a          | AO09002600016    |
| AO09002600017        | 8              | 407           | <b>estA</b>    | Putative hydrolase; member of the aflatoxin biosynthesis gene cluster                                                                                                                                                       | n/a          | AO09002600017    |
| AO09002600018        | 9              | 291           | <b>norA</b>    | Putative oxidoreductase; member of the aflatoxin biosynthesis gene cluster                                                                                                                                                  | n/a          | AO09002600018    |
| AO09002600019        | 10             | 1094          | <b>ver1</b>    | Dehydrogenase/ketoreductase; putative aflatoxin biosynthesis protein; member of the aflatoxin biosynthesis gene cluster                                                                                                     | n/a          | AO09002600019    |
| AO09002600020        | 11             | 859           | <b>CYP59A4</b> | Cytochrome P450 monooxygenase; member of the aflatoxin biosynthesis gene cluster                                                                                                                                            | n/a          | AO09002600020    |

|                |    |      |         |                                                                                                                                                                                                                                            |     |                |    |
|----------------|----|------|---------|--------------------------------------------------------------------------------------------------------------------------------------------------------------------------------------------------------------------------------------------|-----|----------------|----|
| AO090026000021 | 12 | 1052 | avnA    | Member of the aflatoxin biosynthesis gene cluster                                                                                                                                                                                          | n/a | AO090026000021 | ED |
| AO090026000022 | 13 | 368  | CYP60B3 | Cytochrome P450 monooxygenase; adjacent to the aflatoxin biosynthesis gene cluster                                                                                                                                                         | n/a | AO090026000022 |    |
| AO090026000023 | 14 | 375  |         | Protein of unknown function<br>Ortholog(s) have role in monodictyphenone biosynthetic process                                                                                                                                              | n/a | AO090026000023 |    |
| AO090026000024 | 15 | 205  |         | Domain(s) with predicted O-methyltransferase activity                                                                                                                                                                                      | n/a | AO090026000024 |    |
| AO090026000025 | 16 | 178  |         | Domain(s) with predicted electron carrier activity, heme binding, iron ion binding, oxidoreductase activity, acting on paired donors, with incorporation or reduction of molecular oxygen activity and role in oxidation-reduction process | n/a | AO090026000025 |    |
| AO090026000026 | 17 | 1266 | omtA    | O-methyltransferase                                                                                                                                                                                                                        | n/a | AO090026000026 |    |
| AO090026000027 | 18 | 1246 | vbs     | Domain(s) with predicted flavin adenine dinucleotide binding, oxidoreductase activity, acting on CH-OH group of donors activity and role in oxidation-reduction process                                                                    | n/a | AO090026000027 |    |
| AO090026000028 | 19 | 515  |         | Domain(s) with predicted electron carrier activity, heme binding, iron ion binding, oxidoreductase activity, acting on paired donors, with incorporation or reduction of molecular oxygen activity and role in oxidation-reduction process | n/a | AO090026000028 |    |
| AO090026000029 | 20 | 544  | CYP62A1 | Cytochrome P450 monooxygenase                                                                                                                                                                                                              | n/a | AO090026000029 |    |

## A0090026000149 cluster

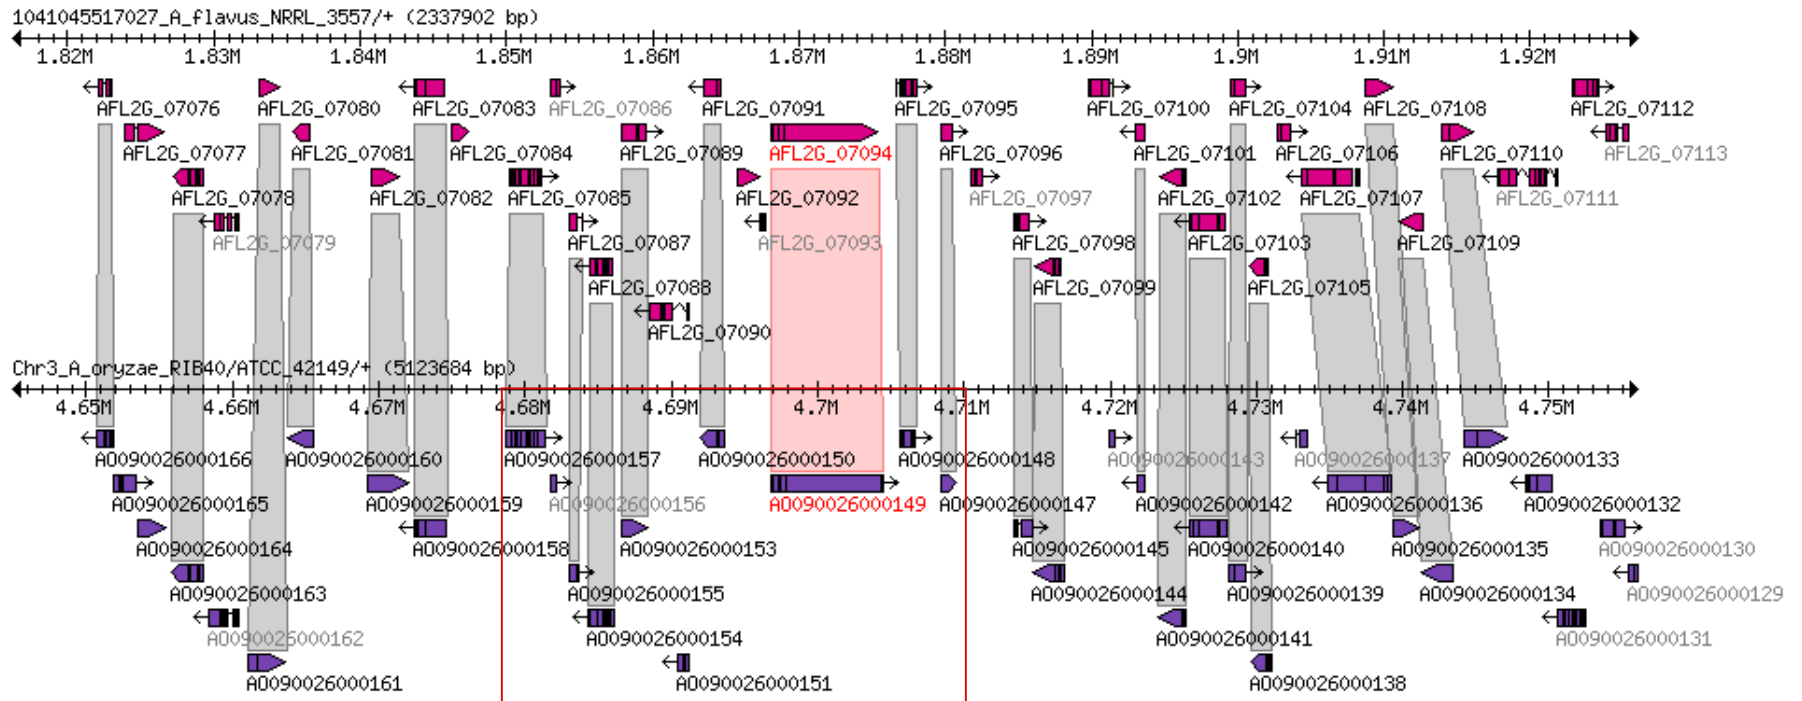

**AO090026000149 cluster**

| Gene id (SMURF)       | Gene positions | Gene distance | Gene Name | Annotated_gene_function                                                                                                                                                                           | antiSMASH ID | AspGD ID       |          |
|-----------------------|----------------|---------------|-----------|---------------------------------------------------------------------------------------------------------------------------------------------------------------------------------------------------|--------------|----------------|----------|
| n/a                   |                |               |           | Ortholog(s) have GMP synthase (glutamine-hydrolyzing) activity and role in GMP biosynthetic process                                                                                               | prot_ID_170  | AO090026000141 |          |
| n/a                   |                |               |           | Ortholog of A. nidulans FGSC A4 : AN11171, AN7148, A. fumigatus Af293 : Afu4g03595, A. niger CBS 513.88 : An02g01320, An14g01685, An03g06340 and A. oryzae RIB40 : AO090026000213, AO090023000130 | prot_ID_627  | AO090026000142 |          |
| n/a                   |                |               |           | Domain(s) with predicted aldehyde dehydrogenase [NAD(P)+] activity and role in cellular aldehyde metabolic process, oxidation-reduction process                                                   | prot_ID_1565 | AO090026000143 |          |
| n/a                   |                |               |           | Domain(s) with predicted role in transmembrane transport and integral to membrane localization                                                                                                    | prot_ID_741  | AO090026000144 |          |
| n/a                   |                |               |           | Domain(s) with predicted oxidoreductase activity and role in metabolic process                                                                                                                    | prot_ID_1220 | AO090026000145 |          |
| n/a                   |                |               |           | Ortholog of A. flavus NRRL 3357 : AFL2T_07096                                                                                                                                                     | prot_ID_1163 | AO090026000147 | ECS, IGD |
| n/a                   |                |               |           | Ortholog(s) have feruloyl esterase activity and role in cell wall polysaccharide catabolic process, polysaccharide catabolic process                                                              | prot_ID_436  | AO090026000148 |          |
| <b>AO090026000149</b> | 0              | 0             |           | Polyketide synthase                                                                                                                                                                               | prot_ID_1341 | AO090026000149 |          |
| AO090026000150        | 1              | 3254          |           | Ortholog of A. niger CBS 513.88 : An01g01780, An15g02150, A. brasiliensis : Aspbr1_0047637, A. niger ATCC 1015 : 171681-mRNA, 40476-mRNA and A. flavus NRRL 3357 : AFL2T_07091                    | prot_ID_102  | AO090026000150 |          |
| AO090026000151        | 2              | 1023          |           | Ortholog of A. niger CBS 513.88 : An09g00960                                                                                                                                                      | prot_ID_1596 | AO090026000151 |          |
| AO090026000153        | 3              | 2130          |           | Ortholog(s) have alkyl sulfatase activity, arylsulfatase activity and role in dodecyl sulfate metabolic process                                                                                   | prot_ID_1348 | AO090026000153 |          |
| AO090026000154        | 4              | 553           |           | Domain(s) with predicted role in transmembrane transport and integral to membrane localization                                                                                                    | prot_ID_1146 | AO090026000154 |          |
| AO090026000155        | 5              | 576           |           | Ortholog of A. flavus NRRL 3357 : AFL2T_07087                                                                                                                                                     | prot_ID_245  | AO090026000155 |          |
| AO090026000156        | 6              | 822           |           | Protein of unknown function                                                                                                                                                                       | prot_ID_922  | AO090026000156 |          |
| AO090026000157        | 7              | 587           |           | Domain(s) with predicted ATP binding, ATPase activity and membrane localization                                                                                                                   | prot_ID_9    | AO090026000157 | ECS, IGD |

## A0090026000378 cluster

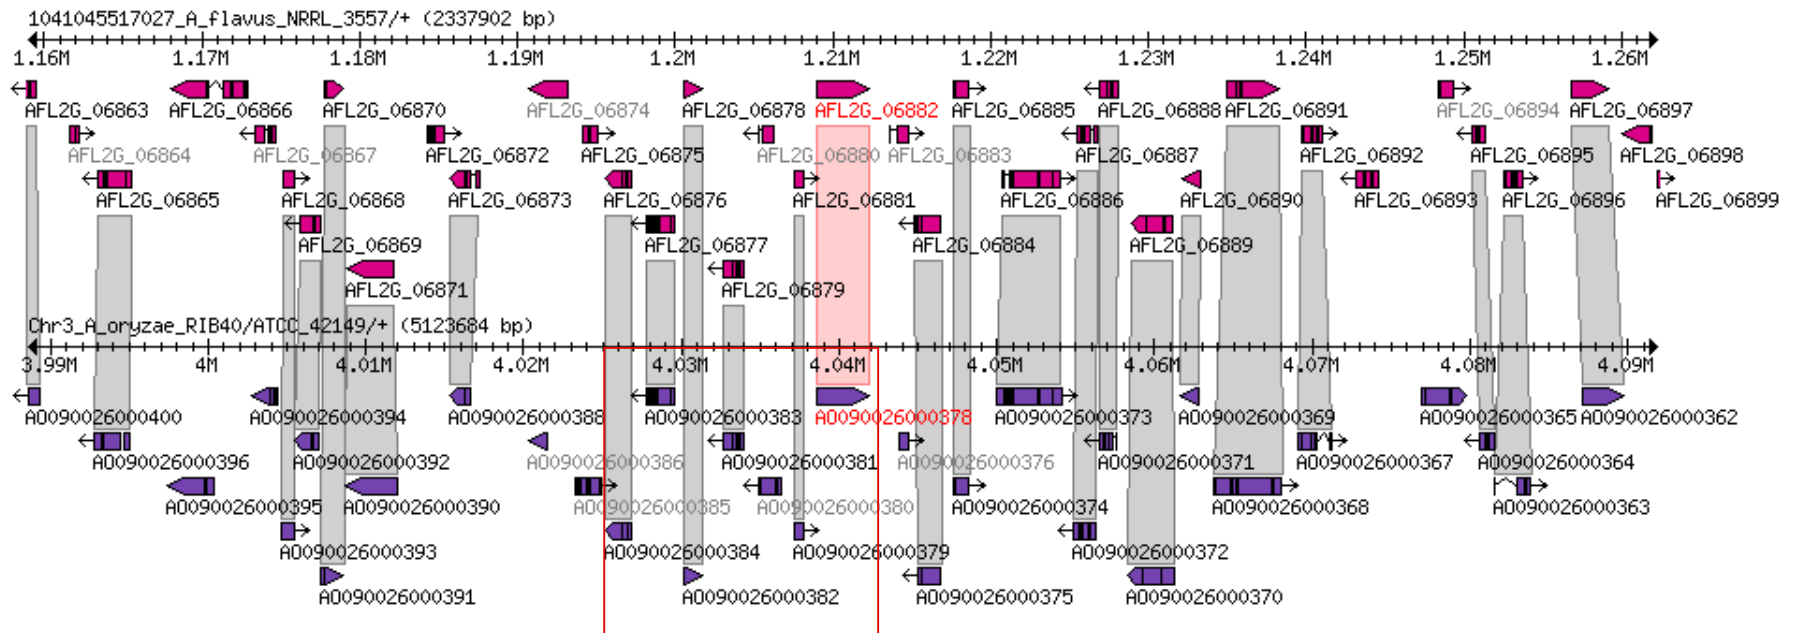

**AO090026000378 cluster**

| Gene id (SMURF)       | Gene positions | Gene distance | Gene Name | Annotated_gene_function                                                                                                                                                                                                                    | antiSMASH ID | AspGD ID               |
|-----------------------|----------------|---------------|-----------|--------------------------------------------------------------------------------------------------------------------------------------------------------------------------------------------------------------------------------------------|--------------|------------------------|
| n/a                   |                |               |           | Inosine-uridine preferring nucleoside hydrolase                                                                                                                                                                                            | n/a          | AO090026000367         |
| n/a                   |                |               |           | WD40 repeat protein                                                                                                                                                                                                                        | n/a          | AO090026000368         |
| n/a                   |                |               |           | Ortholog of A. nidulans FGSC A4 : AN6290, A. fumigatus Af293 : Afu2g12370, A. niger CBS 513.88 : An02g04480, A. niger ATCC 1015 : 36891-mRNA and A. versicolor : Aspve1_0041143                                                            | prot_ID_842  | AO090026000369         |
| n/a                   |                |               |           | Ortholog of A. nidulans FGSC A4 : AN6289, A. fumigatus Af293 : Afu2g12380, A. niger CBS 513.88 : An02g04500, A. niger ATCC 1015 : 119850-mRNA and A. versicolor : Aspve1_0130464                                                           | prot_ID_912  | AO090026000370         |
| n/a                   |                |               |           | Ortholog(s) have kinase regulator activity, role in cellular calcium ion homeostasis, conidium formation, protein phosphorylation, septin ring assembly and cell septum, cellular bud neck, spindle pole body localization                 | prot_ID_1463 | AO090026000371         |
| n/a                   |                |               |           | Ortholog(s) have hydrogen ion transporting ATP synthase activity, rotational mechanism, proton-transporting ATPase activity, rotational mechanism activity and role in ATP synthesis coupled proton transport                              | prot_ID_1155 | AO090026000372         |
| n/a                   |                |               |           | Ortholog(s) have cytoplasm localization                                                                                                                                                                                                    | prot_ID_153  | AO090026000373         |
| n/a                   |                |               |           | Ortholog of A. flavus NRRL 3357 : AFL2T_06885 and A. aculeatus ATCC16872 : Aacu16872_064869                                                                                                                                                | prot_ID_1068 | AO090026000374         |
| n/a                   |                |               |           | Ortholog of A. nidulans FGSC A4 : AN4040, AN7213, A. fumigatus Af293 : Afu5g00960, A. niger CBS 513.88 : An18g01180, An10g00910, An11g01220, An01g11560 and A. oryzae RIB40 : AO090023000615, AO090166000079                               | prot_ID_403  | AO090026000375         |
| n/a                   |                |               |           | Protein of unknown function                                                                                                                                                                                                                | prot_ID_68   | AO090026000376         |
| <b>AO090026000378</b> | 0              | 0             |           | <b>Non-ribosomal peptide synthetase</b><br>Ortholog of A. nidulans FGSC A4 : AN7208, A. fumigatus Af293 : Afu6g10080, A. versicolor : Aspve1_0125526 and A. sydowii : Aspsy1_0084577                                                       | prot_ID_284  | AO090026000378 ECS     |
| AO090026000379        | 1              | 929           |           | Domain(s) with predicted catalytic activity and role in polyamine biosynthetic process                                                                                                                                                     | prot_ID_1135 | AO090026000379         |
| AO090026000380        | 2              | 813           |           | Ortholog of A. flavus NRRL 3357 : AFL2T_06879                                                                                                                                                                                              | prot_ID_1360 | AO090026000380         |
| AO090026000381        | 3              | 933           |           | Domain(s) with predicted trichodiene synthase activity and role in sesquiterpenoid biosynthetic process                                                                                                                                    | prot_ID_587  | AO090026000381         |
| AO090026000382        | 4              | 1310          |           | Cytochrome P450 monooxygenase                                                                                                                                                                                                              | prot_ID_255  | AO090026000382         |
| AO090026000383        | 5              | 605           |           | Domain(s) with predicted electron carrier activity, heme binding, iron ion binding, oxidoreductase activity, acting on paired donors, with incorporation or reduction of molecular oxygen activity and role in oxidation-reduction process | prot_ID_1129 | AO090026000383         |
| AO090026000384        | 6              | 861           |           |                                                                                                                                                                                                                                            | prot_ID_82   | AO090026000384 ECS, FA |



|                |   |      |                                                                                                                                                                                  |              |                |
|----------------|---|------|----------------------------------------------------------------------------------------------------------------------------------------------------------------------------------|--------------|----------------|
| AO090026000385 | 7 | 255  | Domain(s) with predicted nucleotide binding activity                                                                                                                             | prot_ID_1096 | AO090026000385 |
| AO090026000386 | 8 | 1735 | Protein of unknown function                                                                                                                                                      | prot_ID_23   | AO090026000386 |
| AO090026000388 | 9 | 3664 | Domain(s) with predicted UDP-N-acetylmuramate dehydrogenase activity, flavin adenine dinucleotide binding activity and role in oxidation-reduction process                       | prot_ID_206  | AO090026000388 |
| n/a            |   |      | Ortholog of A. nidulans FGSC A4 : AN6284, A. fumigatus Af293 : Afu2g12430, A. niger CBS 513.88 : An02g04620, A. niger ATCC 1015 : 46977-mRNA and A.s versicolor : Aspve1_0641422 | prot_ID_152  | AO090026000390 |

## AO090026000585 cluster

No matches to clusters in other species

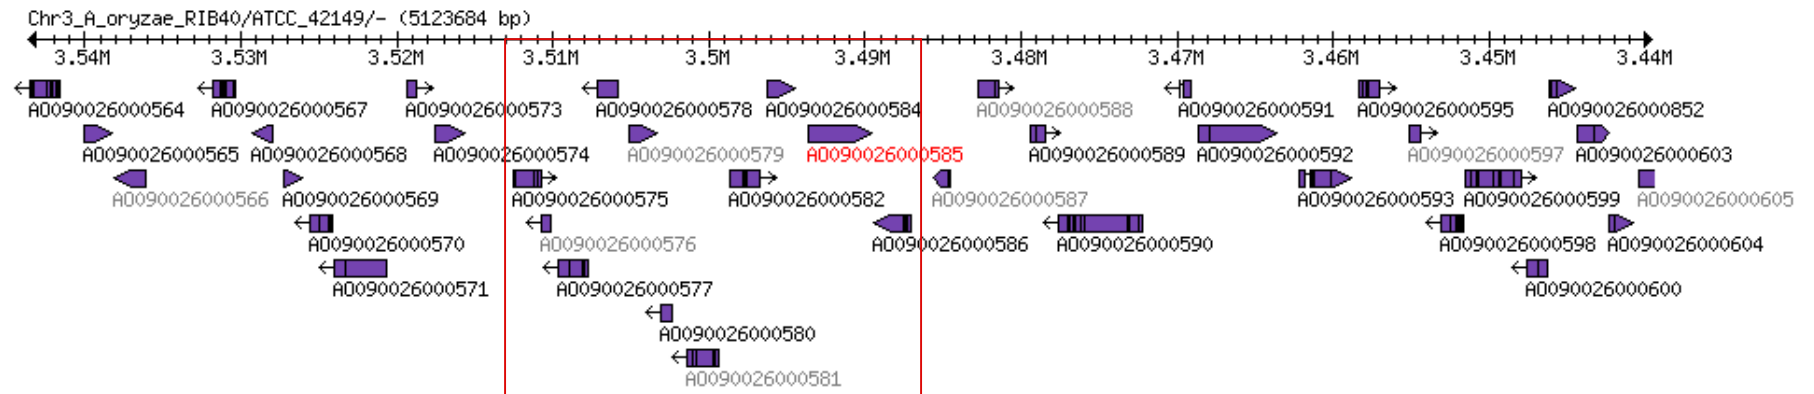

**AO090026000585 cluster**

| Gene id (SMURF)       | Gene positions | Gene distance | Gene Name | Annotated_gene_function                                                                                      | antiSMASH ID | AspGD ID       |    |
|-----------------------|----------------|---------------|-----------|--------------------------------------------------------------------------------------------------------------|--------------|----------------|----|
| AO090026000575        | -9             | 61            |           | Cytochrome P450 monooxygenase                                                                                | prot_ID_447  | AO090026000575 | FA |
| AO090026000576        | -8             | 501           |           | Domain(s) with predicted hydrolase activity                                                                  | prot_ID_182  | AO090026000576 |    |
| AO090026000577        | -7             | 613           |           | Domain(s) with predicted role in transmembrane transport and integral to membrane localization               | prot_ID_658  | AO090026000577 |    |
| AO090026000578        | -6             | 589           |           | Ortholog(s) have role in alkaloid biosynthetic process, emericellamide A biosynthetic process                | prot_ID_8    | AO090026000578 |    |
| AO090026000579        | -5             | 421           |           | Cytochrome P450 monooxygenase                                                                                | prot_ID_893  | AO090026000579 |    |
| AO090026000580        | -4             | 1064          |           | Domain(s) with predicted nucleotide binding, oxidoreductase activity and role in oxidation-reduction process | prot_ID_729  | AO090026000580 |    |
| AO090026000581        | -3             | 962           |           | Cytochrome P450 monooxygenase                                                                                | prot_ID_1462 | AO090026000581 |    |
| AO090026000582        | -2             | 816           |           | Protein of unknown function                                                                                  | prot_ID_501  | AO090026000582 |    |
| AO090026000584        | -1             | 972           |           | Cytochrome P450 monooxygenase                                                                                | prot_ID_374  | AO090026000584 |    |
| <b>AO090026000585</b> | 0              | 0             |           | Non-ribosomal peptide synthetase                                                                             | prot_ID_1065 | AO090026000585 |    |
| n/a                   |                |               |           | Predicted phenylalanine ammonia-lyase                                                                        | prot_ID_193  | AO090026000586 | FA |
| n/a                   |                |               |           | Protein of unknown function                                                                                  | prot_ID_875  | AO090026000587 |    |
| n/a                   |                |               |           | Protein of unknown function                                                                                  | prot_ID_677  | AO090026000588 |    |
| n/a                   |                |               |           | Protein of unknown function                                                                                  | prot_ID_1433 | AO090026000589 |    |
| n/a                   |                |               |           | Guanine nucleotide binding protein MIP1                                                                      | prot_ID_439  | AO090026000590 |    |
| n/a                   |                |               |           | Ortholog of A. flavus NRRL 3357 : AFL2T_06706                                                                | prot_ID_1551 | AO090026000591 |    |

## AO9003800086 cluster

Possible orphan PKS, no manual prediction made

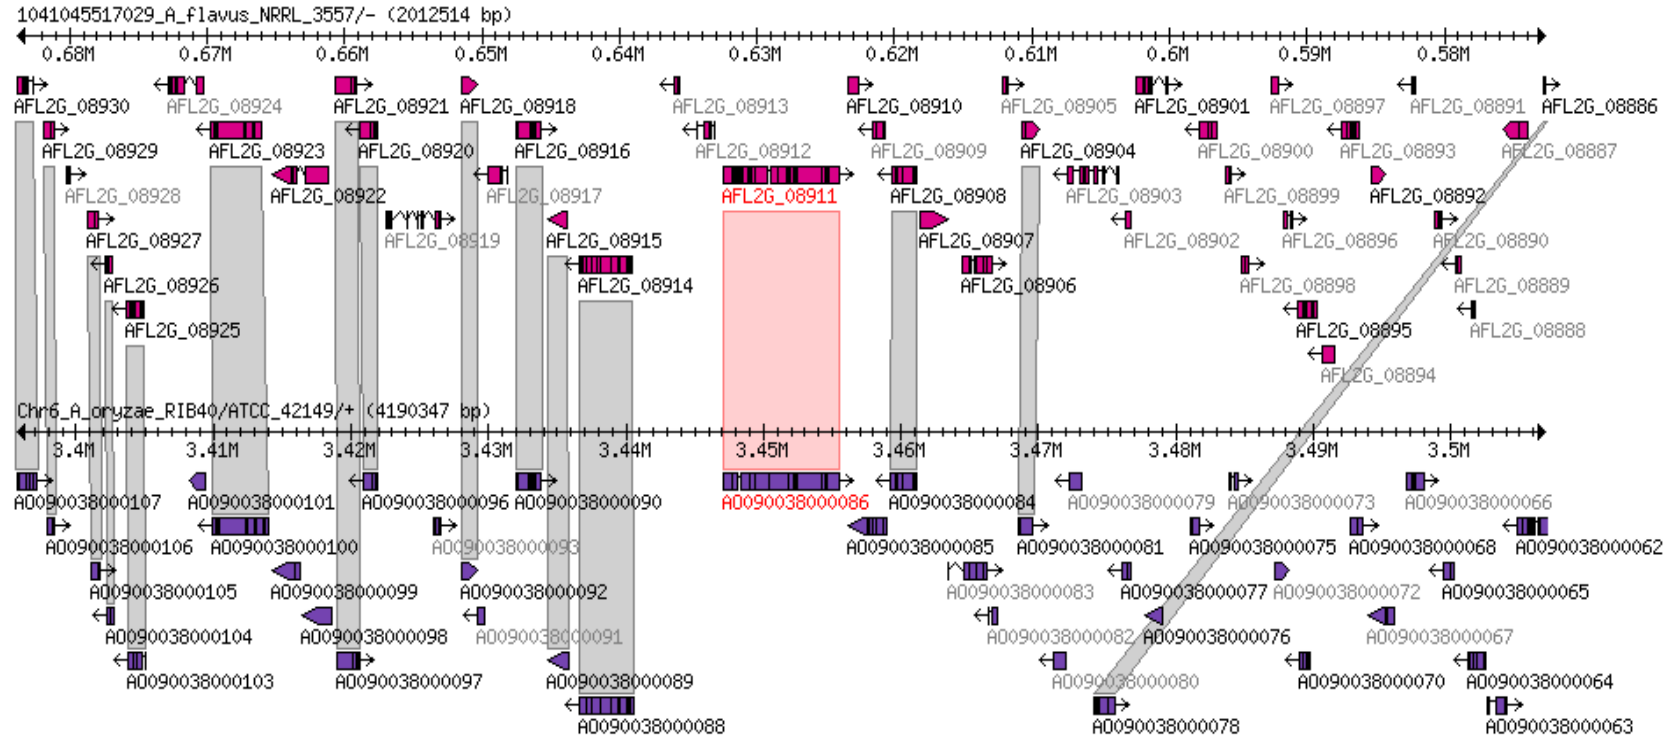

**AO090038000086 cluster**

| Gene id (SMURF)       | Gene positions | Gene distance | Gene Name | Annotated_gene_function                                                                                                                                                                                                               | antiSMASH ID | AspGD ID       |
|-----------------------|----------------|---------------|-----------|---------------------------------------------------------------------------------------------------------------------------------------------------------------------------------------------------------------------------------------|--------------|----------------|
| AO090038000078        | -8             | 973           |           | Domain(s) with predicted role in transmembrane transport and integral to membrane localization                                                                                                                                        | prot_ID_138  | AO090038000078 |
| AO090038000079        | -7             | 342           |           | Protein of unknown function                                                                                                                                                                                                           | prot_ID_737  | AO090038000079 |
| AO090038000080        | -6             | 1391          |           | Protein of unknown function                                                                                                                                                                                                           | prot_ID_363  | AO090038000080 |
| AO090038000081        | -5             | 1538          |           | Domain(s) with predicted oxidoreductase activity and role in carotenoid biosynthetic process, chlorophyll biosynthetic process, oxidation-reduction process, photosynthesis                                                           | prot_ID_555  | AO090038000081 |
| AO090038000082        | -4             | 67            |           | Domain(s) with predicted transmembrane transporter activity, role in transmembrane transport and integral to membrane localization                                                                                                    | prot_ID_1126 | AO090038000082 |
| AO090038000083        | -3             | 2260          |           | Domain(s) with predicted UDP-N-acetylmuramate dehydrogenase activity, flavin adenine dinucleotide binding activity and role in oxidation-reduction process                                                                            | prot_ID_781  | AO090038000083 |
| AO090038000084        | -2             | 439           |           | Domain(s) with predicted role in transmembrane transport and integral to membrane localization                                                                                                                                        | prot_ID_48   | AO090038000084 |
| AO090038000085        | -1             | 1468          |           | Domain(s) with predicted sequence-specific DNA binding RNA polymerase II transcription factor activity, zinc ion binding activity, role in regulation of transcription, DNA-dependent and nucleus localization                        | prot_ID_304  | AO090038000085 |
| <b>AO090038000086</b> | 0              | 0             |           | Polyketide synthase                                                                                                                                                                                                                   | prot_ID_886  | AO090038000086 |
| n/a                   |                |               |           | Domain(s) with predicted sequence-specific DNA binding RNA polymerase II transcription factor activity, zinc ion binding activity, role in regulation of transcription, DNA-dependent and nucleus localization                        | prot_ID_304  | AO090038000085 |
| n/a                   |                |               |           | Domain(s) with predicted ATP binding, ATPase activity, coupled to transmembrane movement of ions, phosphorylative mechanism, metal ion binding activity, role in ATP biosynthetic process, cation transport and membrane localization | prot_ID_1027 | AO090038000088 |
| n/a                   |                |               |           | Ortholog of A. nidulans FGSC A4 : AN2957, A. fumigatus Af293 : Afu4g14680, A. niger CBS 513.88 : An02g11270, A. niger ATCC 1015 : 173463-mRNA and A. versicolor : Aspve1_0051391                                                      | prot_ID_15   | AO090038000089 |
| n/a                   |                |               |           | Domain(s) with predicted substrate-specific transmembrane transporter activity, role in transmembrane transport and integral to membrane localization                                                                                 | prot_ID_187  | AO090038000090 |
| n/a                   |                |               |           | Protein of unknown function                                                                                                                                                                                                           | prot_ID_736  | AO090038000091 |
| n/a                   |                |               |           | Ribokinase                                                                                                                                                                                                                            | prot_ID_142  | AO090038000092 |

## AO09003800098 cluster

No PKS or NRPS backbone

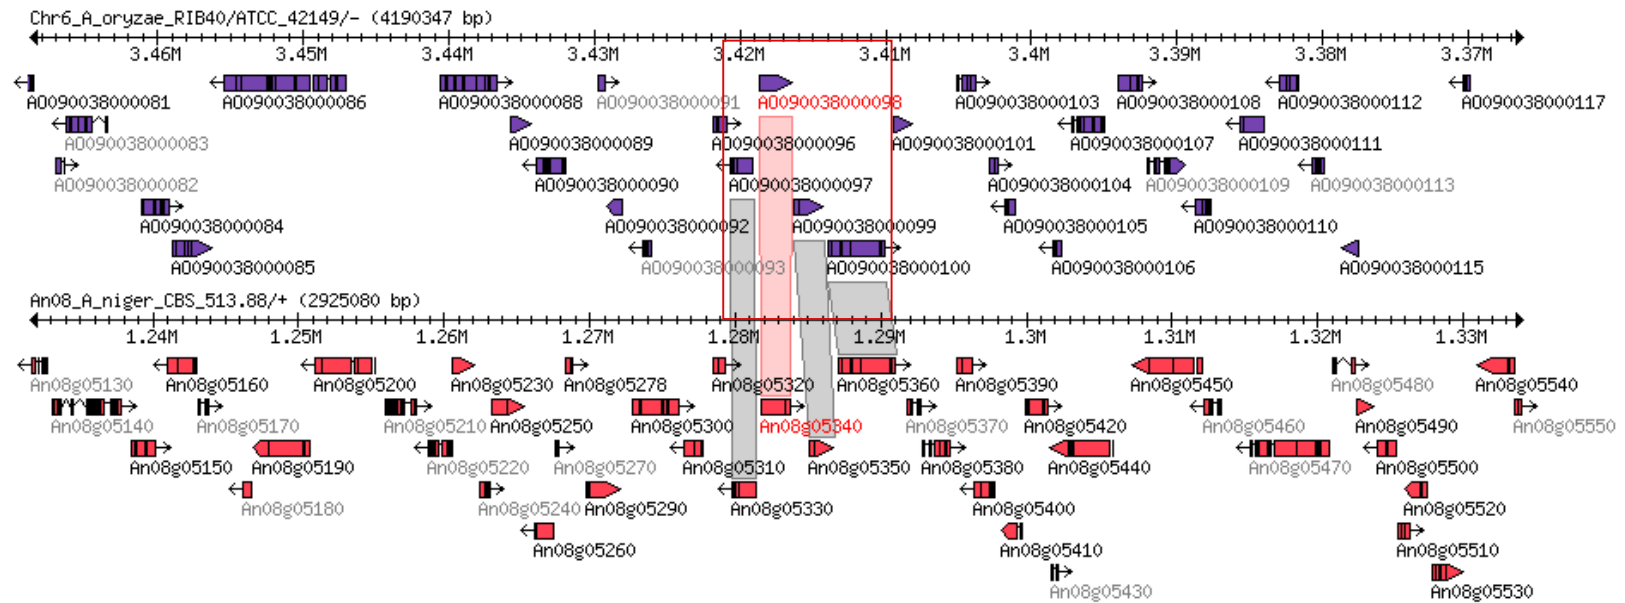

**AO090038000098 cluster**

| Gene id (SMURF) | Gene positions | Gene distance | Gene Name | Annotated_gene_function                                                                                                                                                                       | antiSMASH ID | AspGD ID           |
|-----------------|----------------|---------------|-----------|-----------------------------------------------------------------------------------------------------------------------------------------------------------------------------------------------|--------------|--------------------|
| n/a             |                |               |           | Ortholog(s) have cytoplasm, nucleus localization                                                                                                                                              | prot_ID_142  | AO090038000092     |
| n/a             |                |               |           | Protein of unknown function                                                                                                                                                                   | prot_ID_58   | AO090038000093     |
| n/a             |                |               |           | Domain(s) with predicted oxidoreductase activity, acting on the CH-CH group of donors activity, role in lipid metabolic process and cytoplasm, integral to membrane localization              | prot_ID_1102 | AO090038000096     |
| n/a             |                |               | CYP5087B1 | <b>Cytochrome P450 monooxygenase</b>                                                                                                                                                          | prot_ID_1013 | AO090038000097 ECS |
| n/a             |                |               |           | <b>Squalene cyclase</b>                                                                                                                                                                       | prot_ID_932  | AO090038000098     |
| n/a             |                |               |           | <b>Domain(s) with predicted transferase activity, transferring acyl groups other than amino-acyl groups activity</b>                                                                          | prot_ID_213  | AO090038000099     |
| n/a             |                |               |           | <b>Domain(s) with predicted ATP binding, ATPase activity, coupled to transmembrane movement of substances activity, role in transmembrane transport and integral to membrane localization</b> | prot_ID_854  | AO090038000100 ECS |
| n/a             |                |               |           | Ortholog of A. niger CBS 513.88 : An13g03860, A. brasiliensis : Aspbr1_0128603, A. acidus : Aspfo1_0143176 and A. niger ATCC 1015 : 44928-mRNA                                                | prot_ID_281  | AO090038000101     |

## AO090038000149 cluster

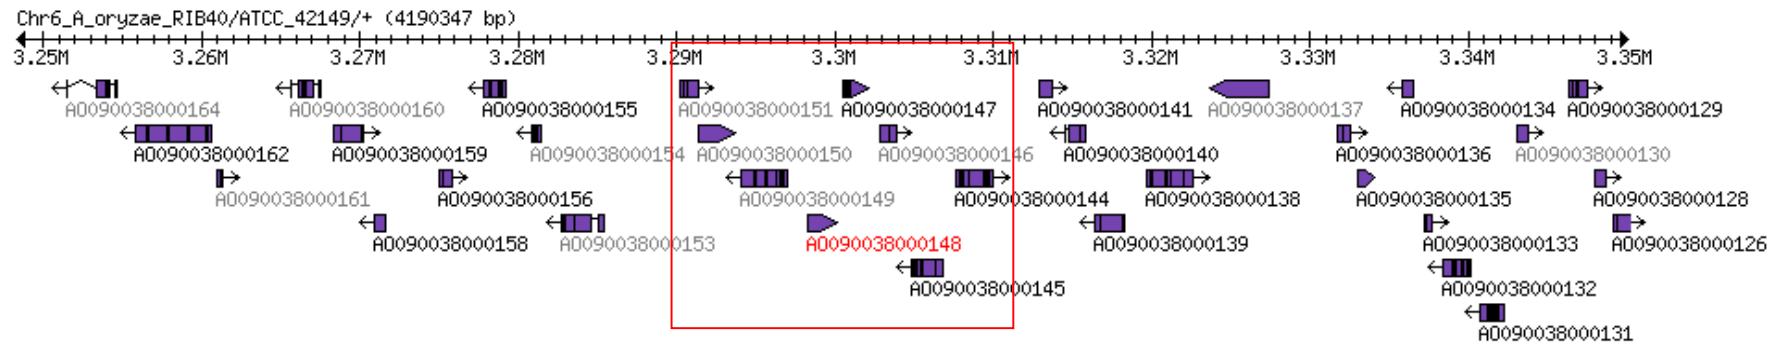



**AO090038000149 cluster**

| Gene id (SMURF)       | Gene positions | Gene distance | Gene Name | Annotated_gene_function                                                                                                                                                                                                                                                                                                       | antiSMASH ID | AspGD ID           |
|-----------------------|----------------|---------------|-----------|-------------------------------------------------------------------------------------------------------------------------------------------------------------------------------------------------------------------------------------------------------------------------------------------------------------------------------|--------------|--------------------|
| n/a                   |                |               |           | Domain(s) with predicted carboxy-lyase activity, magnesium ion binding, thiamine pyrophosphate binding, transferase activity<br>Ortholog of A. nidulans FGSC A4 : AN3379, A. fumigatus Af293 : Afu7g01170, A. niger CBS 513.88 : An12g01970, An01g00420, A. oryzae RIB40 : AO090010000104 and A. niger ATCC 1015 : 50335-mRNA | prot_ID_179  | AO090038000139     |
| n/a                   |                |               |           | Domain(s) with predicted role in guanosine tetraphosphate metabolic process                                                                                                                                                                                                                                                   | prot_ID_1069 | AO090038000140     |
| n/a                   |                |               |           | Ortholog(s) have inorganic phosphate transmembrane transporter activity, manganese ion transmembrane transporter activity and role in manganese ion transport, phosphate ion transport, polyphosphate metabolic process                                                                                                       | prot_ID_350  | AO090038000141     |
| AO090038000144        | -5             | 781           |           | Ortholog of A. flavus NRRL 3357 : AFL2T_08965, Neosartorya fischeri NRRL 181 : NFIA_040790, A. versicolor : Aspve1_0035582 and A. sydowii : Aspsy1_0040722                                                                                                                                                                    | prot_ID_159  | AO090038000144     |
| AO090038000145        | -4             | 1097          |           | Domain(s) with predicted N-acetyltransferase activity and role in metabolic process                                                                                                                                                                                                                                           | prot_ID_716  | AO090038000145 IGD |
| AO090038000146        | -3             | 867           |           | Domain(s) with predicted role in transmembrane transport and integral to membrane localization                                                                                                                                                                                                                                | prot_ID_544  | AO090038000146     |
| AO090038000147        | -2             | 454           |           | Domain(s) with predicted ATP binding, D-alanine-D-alanine ligase activity, metal ion binding activity                                                                                                                                                                                                                         | prot_ID_1123 | AO090038000147     |
| AO090038000148        | -1             | 1419          |           | Non-ribosomal peptide synthetase                                                                                                                                                                                                                                                                                              | prot_ID_67   | AO090038000148     |
| <b>AO090038000149</b> | 0              | 0             |           | Protein of unknown function                                                                                                                                                                                                                                                                                                   | prot_ID_1250 | AO090038000149     |
| n/a                   |                |               |           | Protein of unknown function                                                                                                                                                                                                                                                                                                   | prot_ID_1081 | AO090038000150     |
| n/a                   |                |               |           | Protein of unknown function                                                                                                                                                                                                                                                                                                   | prot_ID_383  | AO090038000151 IGD |
| n/a                   |                |               |           | Protein of unknown function                                                                                                                                                                                                                                                                                                   | prot_ID_543  | AO090038000153     |
| n/a                   |                |               |           | Ortholog of A. fumigatus Af293 : Afu8g01790, A. niger CBS 513.88 : An06g00490, A. brasiliensis : Aspbr1_0053332, A. flavus NRRL 3357 : AFL2T_08968 and A. acidus : Aspfo1_0146077                                                                                                                                             | prot_ID_732  | AO090038000154     |
| n/a                   |                |               |           | Ortholog(s) have IgE binding, ribonuclease activity and role in regulation of cytokine activity                                                                                                                                                                                                                               | prot_ID_22   | AO090038000155     |
| n/a                   |                |               |           |                                                                                                                                                                                                                                                                                                                               | prot_ID_1000 | AO090038000156     |

## A090038000210 cluster

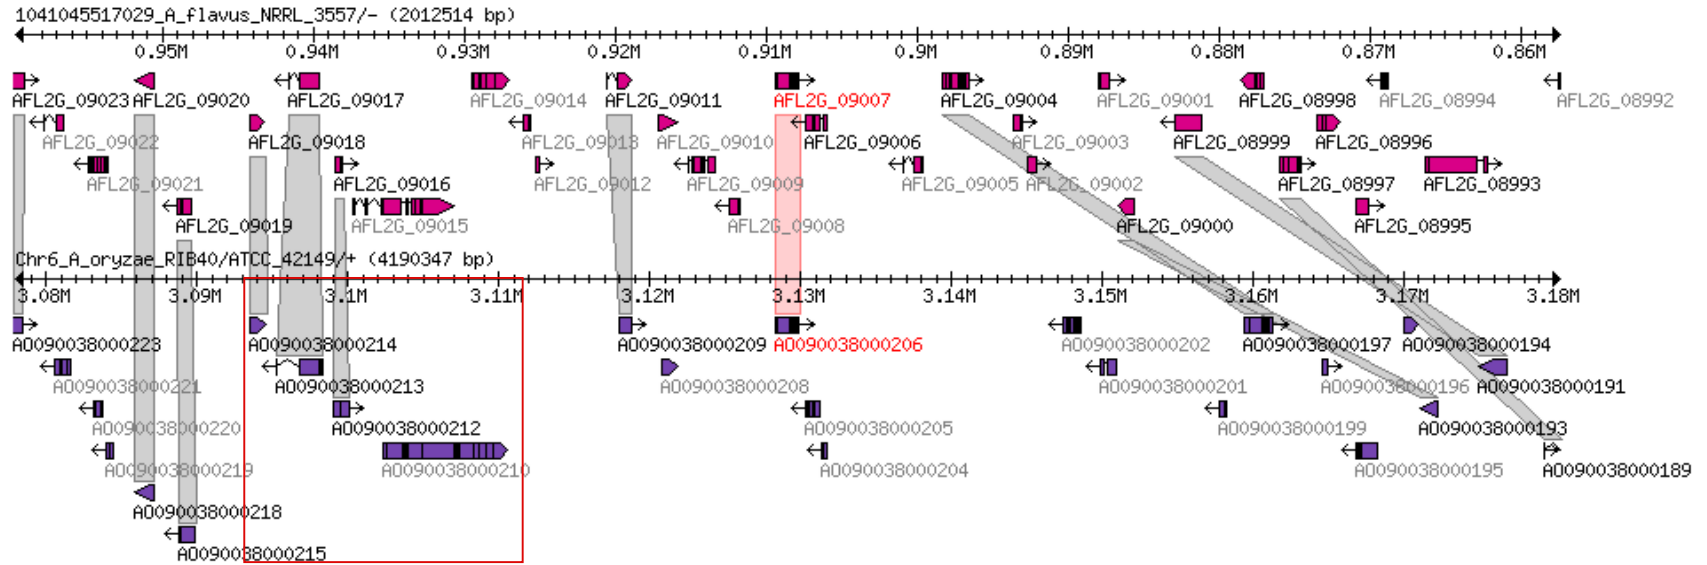

**AO090038000210 cluster**

| Gene id (SMURF) | Gene positions | Gene distance | Gene Name | Annotated_gene_function                                                                                                                                                                             | antiSMASH ID | AspGD ID                |
|-----------------|----------------|---------------|-----------|-----------------------------------------------------------------------------------------------------------------------------------------------------------------------------------------------------|--------------|-------------------------|
| n/a             |                |               |           | Protein of unknown function                                                                                                                                                                         | prot_ID_651  | AO090038000205          |
| n/a             |                |               | CYP58F1   | Cytochrome P450 monooxygenase; upregulated by exposure to benomyl                                                                                                                                   | prot_ID_136  | AO090038000206          |
| n/a             |                |               |           | Protein of unknown function                                                                                                                                                                         | prot_ID_199  | AO090038000208          |
| n/a             |                |               |           | Ortholog of A. flavus NRRL 3357 : AFL2T_09011 and A. aculeatus ATCC16872 : Aacu16872_048001                                                                                                         | prot_ID_406  | AO090038000209          |
| n/a             |                |               |           | Polyketide synthase                                                                                                                                                                                 | prot_ID_1064 | AO090038000210 FA       |
| n/a             |                |               |           | Ortholog of A. nidulans FGSC A4 : AN9006, A. fumigatus Af293 : Afu3g02540, Afu6g11710, Afu7g08440, Afu5g00145, A. niger CBS 513.88 : An09g05330 and N. fischeri NRRL 181 : NFIA_004090, NFIA_057380 | prot_ID_223  | AO090038000212          |
| n/a             |                |               |           | Domain(s) with predicted N,N-dimethylaniline monooxygenase activity, NADP binding, flavin adenine dinucleotide binding activity and role in oxidation-reduction process                             | prot_ID_774  | AO090038000213          |
| n/a             |                |               |           | Domain(s) with predicted triglyceride lipase activity and role in lipid metabolic process                                                                                                           | prot_ID_86   | AO090038000214 ECS, IGD |
| n/a             |                |               |           | Ortholog of A. flavus NRRL 3357 : AFL2T_09019                                                                                                                                                       | prot_ID_1025 | AO090038000215          |
| n/a             |                |               |           | domain(s) with predicted coenzyme binding, hydroxymethylglutaryl-CoA reductase (NADPH) activity and role in coenzyme A metabolic process, oxidation-reduction process                               | prot_ID_366  | AO090038000218          |
| n/a             |                |               |           | Protein of unknown function                                                                                                                                                                         | prot_ID_1254 | AO090038000219          |
| n/a             |                |               |           | Protein of unknown function                                                                                                                                                                         | prot_ID_668  | AO090038000220          |

# A0090038000390 cluster

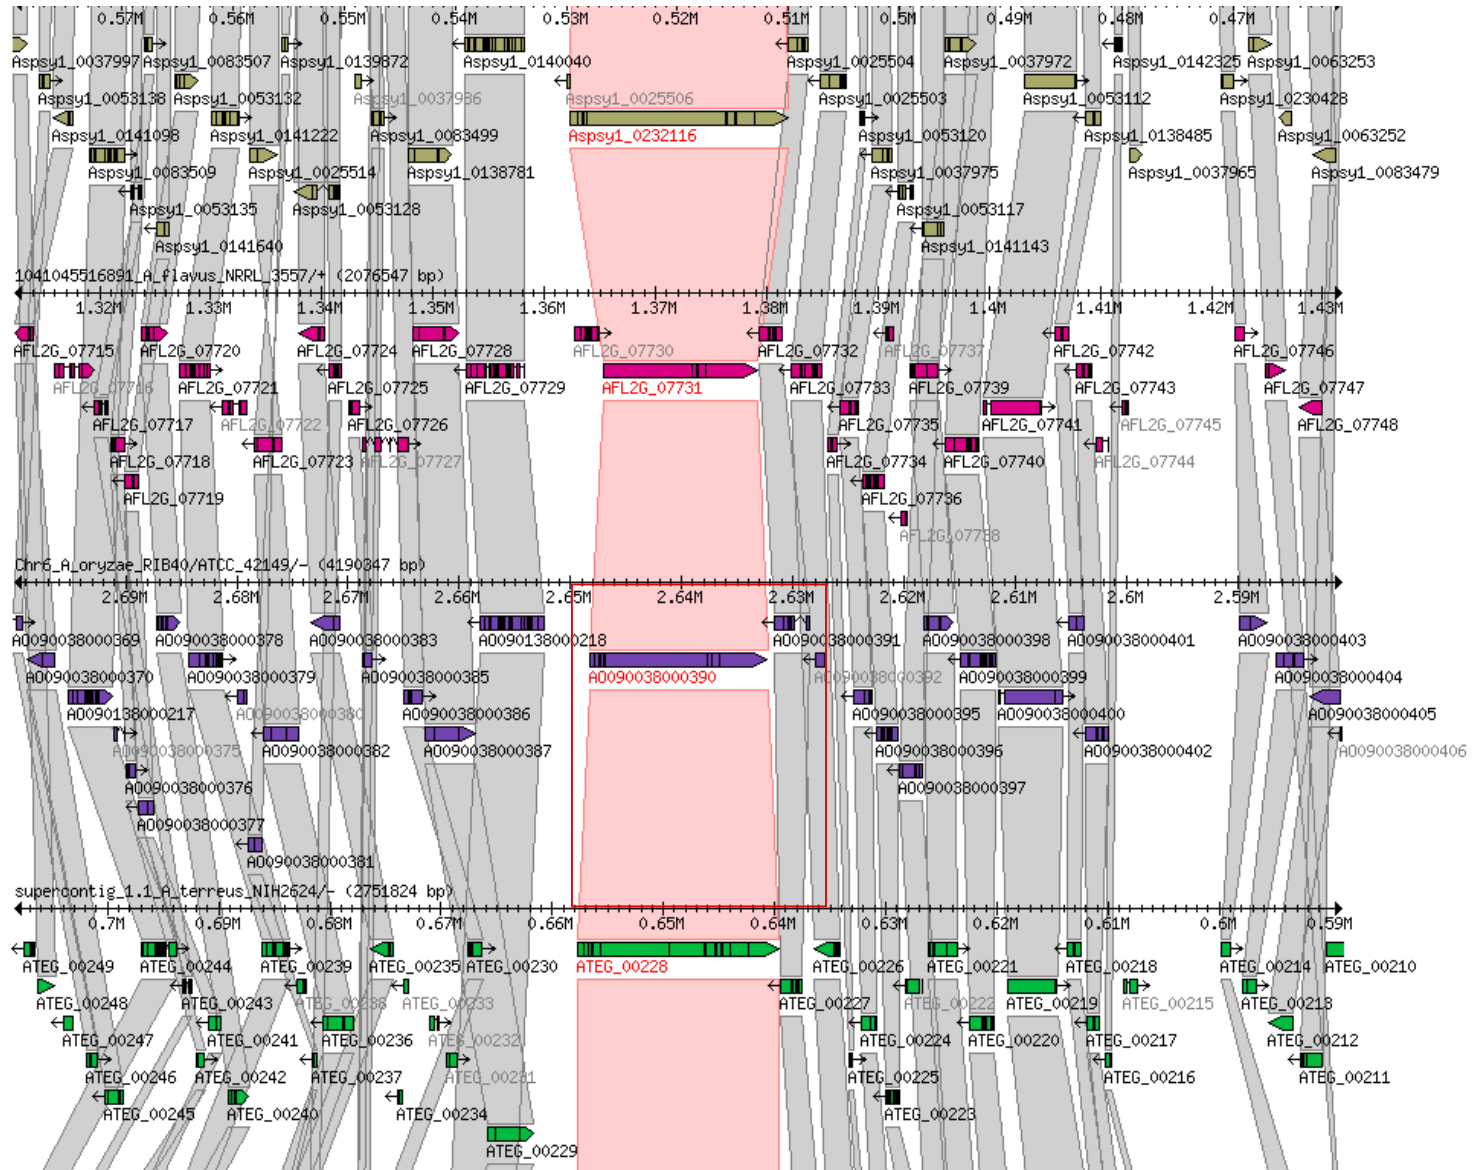

**AO090038000390 cluster**

| Gene id (SMURF)       | Gene positions | Gene distance | Annotated_gene_function                                                                                                                                                                                                                                                                                                                                            | antiSMASH ID | AspGD ID       |     |
|-----------------------|----------------|---------------|--------------------------------------------------------------------------------------------------------------------------------------------------------------------------------------------------------------------------------------------------------------------------------------------------------------------------------------------------------------------|--------------|----------------|-----|
| n/a                   |                |               | Ortholog of A. flavus NRRL 3357 : AFL2T_07726                                                                                                                                                                                                                                                                                                                      | prot_ID_775  | AO090038000385 |     |
| n/a                   |                |               | Ortholog(s) have DNA-dependent ATPase activity, recombinase activity, single-stranded DNA binding activity                                                                                                                                                                                                                                                         | prot_ID_238  | AO090038000386 |     |
| n/a                   |                |               | Ortholog(s) have nuclear pore, spindle pole body localization                                                                                                                                                                                                                                                                                                      | prot_ID_887  | AO090038000387 |     |
| n/a                   |                |               | Domain(s) with predicted ATP binding, ATPase activity, coupled to transmembrane movement of substances activity, role in transmembrane transport and integral to membrane localization                                                                                                                                                                             | prot_ID_1277 | AO090138000218 |     |
| <b>AO090038000390</b> | 0              | 0             | <b>Putative non-ribosomal peptide synthetase; alternative polyadenylation sites predicted</b>                                                                                                                                                                                                                                                                      | prot_ID_1092 | AO090038000390 | ECS |
| AO090038000391        | 1              | 568           | <b>Domain(s) with predicted role in transmembrane transport and integral to membrane localization</b>                                                                                                                                                                                                                                                              | prot_ID_995  | AO090038000391 |     |
| AO090038000392        | 2              | 500           | <b>Protein of unknown function</b>                                                                                                                                                                                                                                                                                                                                 | prot_ID_449  | AO090038000392 | FA  |
| AO090038000395        | 3              | 2726          | Predicted 3-phosphoglycerate kinase with role in glycolysis                                                                                                                                                                                                                                                                                                        | prot_ID_97   | AO090038000395 |     |
| AO090038000396        | 4              | 830           | Ortholog(s) have fungal-type vacuole localization                                                                                                                                                                                                                                                                                                                  | prot_ID_816  | AO090038000396 |     |
| AO090038000397        | 5              | 690           | Ortholog of A. fumigatus Af293 : Afu1g10330, A. niger CBS 513.88 : An08g02230, A. niger ATCC 1015 : 208323-mRNA, A. versicolor : Aspve1_0079224 and A. sydowii : Aspsy1_0141143                                                                                                                                                                                    | prot_ID_272  | AO090038000397 |     |
| AO090038000398        | 6              | 290           | Ortholog(s) have RNA binding activity, role in mRNA splicing, via spliceosome and U1 snRNP, U2-type prespliceosome localization<br>Ortholog(s) have iron ion binding activity, role in ribosomal large subunit biogenesis, ribosomal subunit export from nucleus, translational initiation, translational termination and cytosolic ribosome, nucleus localization | prot_ID_372  | AO090038000398 |     |
| AO090038000399        | 7              | 1310          |                                                                                                                                                                                                                                                                                                                                                                    | prot_ID_909  | AO090038000399 |     |

## AO090038000488 cluster

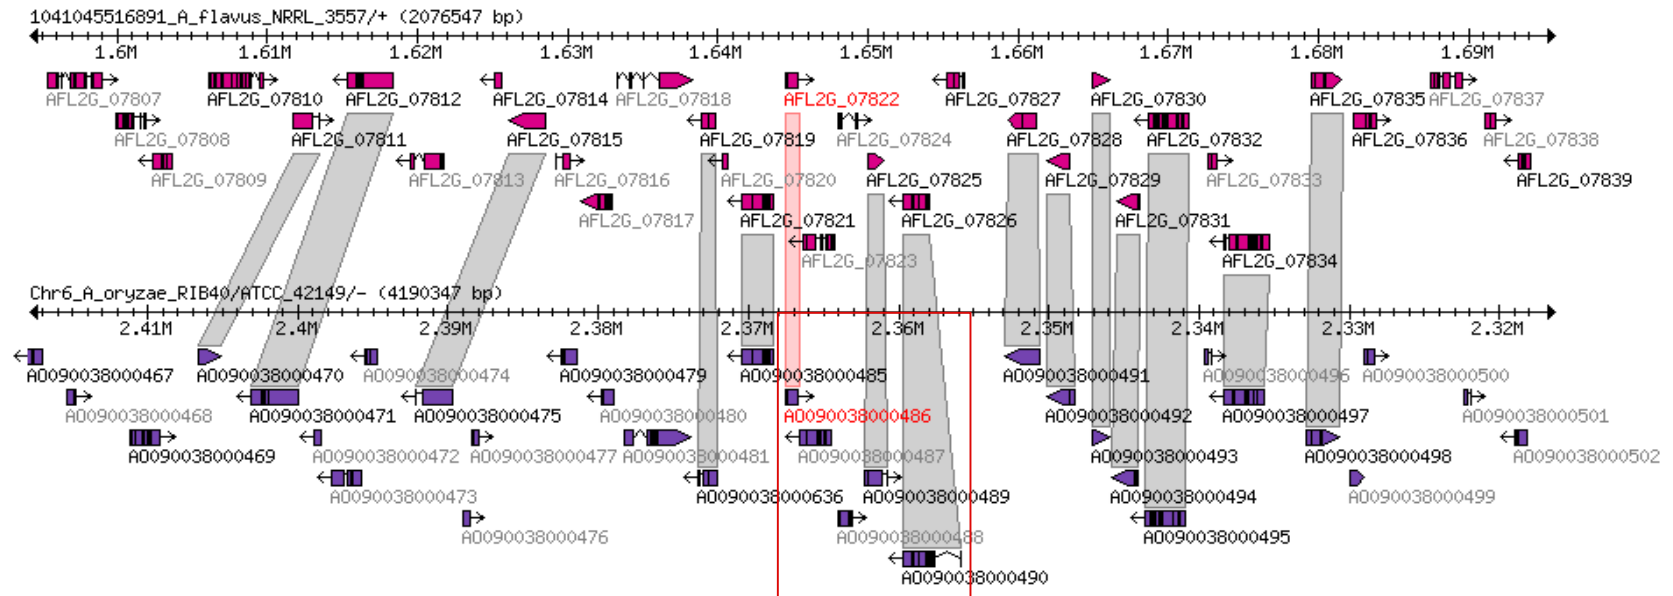

**AO090038000488 cluster**

| Gene id (SMURF) | Gene positions | Gene distance | Gene Name | Annotated_gene_function                                                                                                                                                     | antiSMASH ID | AspGD ID           |
|-----------------|----------------|---------------|-----------|-----------------------------------------------------------------------------------------------------------------------------------------------------------------------------|--------------|--------------------|
| n/a             |                |               |           | Protein of unknown function                                                                                                                                                 | prot_ID_703  | AO090038000480     |
| n/a             |                |               |           | Protein of unknown function                                                                                                                                                 | prot_ID_82   | AO090038000481     |
| n/a             |                |               |           | Ortholog of A. niger CBS 513.88 : An07g00200, A. brasiliensis : Aspbr1_0211901, A. flavus NRRL 3357 : AFL2T_07819 and A. acidus : Aspfo1_0152286                            | prot_ID_1274 | AO090038000483.1   |
| n/a             |                |               |           | Ortholog(s) have enterobactin transporter activity and role in iron ion transport                                                                                           | prot_ID_704  | AO090038000485     |
| n/a             |                |               |           | Ortholog(s) have hydrolase activity, acting on ester bonds activity, role in iron assimilation and cytoplasm localization                                                   | prot_ID_163  | AO090038000486 FA  |
| n/a             |                |               |           | Domain(s) with predicted catalytic activity and role in metabolic process                                                                                                   | prot_ID_848  | AO090038000487     |
| n/a             |                |               | csyC      | Putative type III polyketide synthase                                                                                                                                       | prot_ID_282  | AO090038000488     |
| n/a             |                |               |           | Ortholog of A. nidulans FGSC A4 : AN8222, A. flavus NRRL 3357 : AFL2T_07825, A. versicolor : Aspve1_0047207 and A. sydowii : Aspsy1_0050689                                 | prot_ID_922  | AO090038000489     |
| n/a             |                |               |           | Domain(s) with predicted amino acid transmembrane transporter activity, role in amino acid transmembrane transport and membrane localization                                | prot_ID_57   | AO090038000490 IGD |
| n/a             |                |               |           | Domain(s) with predicted identical protein binding activity                                                                                                                 | prot_ID_744  | AO090038000491     |
| n/a             |                |               |           | Ortholog of A. fumigatus Af293 : Afu1g01420, A. niger CBS 513.88 : An01g01980, An14g00460, A. oryzae RIB40 : AO090138000165 and A. niger ATCC 1015 : 36356-mRNA, 41492-mRNA | prot_ID_127  | AO090038000492     |

## A09003800543 cluster

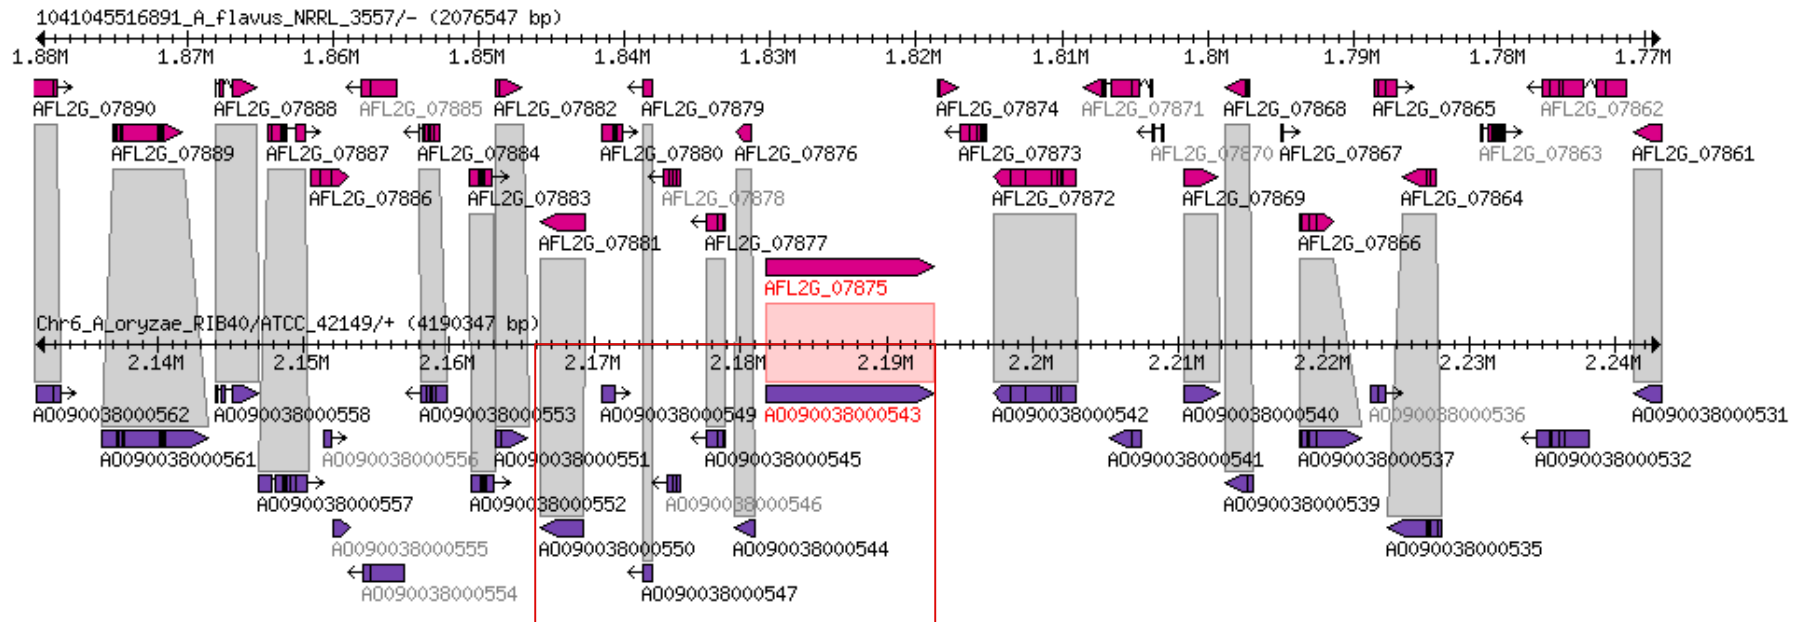



**AO090038000543 cluster**

| Gene id (SMURF)       | Gene positions | Gene distance | Gene Name | Annotated_gene_function                                                                                                                                                                                                             | antiSMASH ID | AspGD ID                |
|-----------------------|----------------|---------------|-----------|-------------------------------------------------------------------------------------------------------------------------------------------------------------------------------------------------------------------------------------|--------------|-------------------------|
| n/a                   |                |               |           | Ortholog of A. nidulans FGSC A4 : AN9130, A. fumigatus Af293 : Afu7g01710, A. niger CBS 513.88 : An12g01000, A. niger ATCC 1015 : 43664-mRNA and A. versicolor : Aspve1_0144405 (2)                                                 | prot_ID_945  | AO090038000540          |
| n/a                   |                |               |           | 3-hydroxy-3-methylglutaryl-coenzyme A lyase/3 methylglutaconyl coenzyme A hydratase; predominantly expressed in the basal region of hyphae                                                                                          | prot_ID_957  | AO090038000541          |
| n/a                   |                |               |           | Ortholog of A. nidulans FGSC A4 : AN8562, A. fumigatus Af293 : Afu4g01580, A. niger CBS 513.88 : An12g00890, A. niger ATCC 1015 : 43655-mRNA and A. versicolor : Aspve1_0142203                                                     | prot_ID_761  | AO090038000542          |
| <b>AO090038000543</b> | 0              | 0             |           | <b>Putative nonribosomal peptide synthase (NRPS)</b>                                                                                                                                                                                | prot_ID_227  | AO090038000543 ECS, IGD |
| AO090038000544        | 1              | 1026          |           | Ortholog(s) have isopenicillin-N synthase activity, manganese ion binding activity and role in penicillin biosynthetic process                                                                                                      | prot_ID_670  | AO090038000544          |
| AO090038000545        | 2              | 1058          |           | Ortholog(s) have isopenicillin-N N-acyltransferase activity and role in penicillin biosynthetic process                                                                                                                             | prot_ID_153  | AO090038000545          |
| AO090038000546        | 3              | 1855          |           | Protein of unknown function                                                                                                                                                                                                         | prot_ID_1061 | AO090038000546          |
| AO090038000547        | 4              | 1068          |           | Ortholog of A. flavus NRRL 3357 : AFL2T_07879                                                                                                                                                                                       | prot_ID_512  | AO090038000547          |
| AO090038000549        | 5              | 1995          |           | 7-keto-8-aminopelargonate synthetase                                                                                                                                                                                                | prot_ID_444  | AO090038000549          |
| AO090038000550        | 6              | 1254          |           | Protein similar to nonribosomal peptide synthases (NRPS-like)                                                                                                                                                                       | prot_ID_1103 | AO090038000550 FA       |
| AO090038000551        | 7              | 971           |           | Domain(s) with predicted transmembrane transporter activity, role in transmembrane transport and integral to membrane localization                                                                                                  | prot_ID_841  | AO090038000551          |
| AO090038000552        | 8              | 271           |           | Ortholog(s) have rhamnogalacturonan alpha-L-rhamnopyranosyl-(1->4)-alpha-D-galactopyranosyluronide lyase activity and role in pectin catabolic process                                                                              | prot_ID_961  | AO090038000552          |
| AO090038000553        | 9              | 1896          |           | Ortholog(s) have role in sulfite transport                                                                                                                                                                                          | prot_ID_395  | AO090038000553          |
| AO090038000554        | 10             | 1635          |           | Domain(s) with predicted DNA binding activity                                                                                                                                                                                       | prot_ID_1136 | AO090038000554          |
| AO090038000555        | 11             | 956           |           | Domain(s) with predicted DNA binding, zinc ion binding activity, role in transcription, DNA-dependent and nucleus localization                                                                                                      | prot_ID_577  | AO090038000555          |
| AO090038000556        | 12             | 77            |           | Protein of unknown function                                                                                                                                                                                                         | prot_ID_667  | AO090038000556          |
| AO090038000557        | 13             | 1141          |           | Domain(s) with predicted DNA binding, sequence-specific DNA binding RNA polymerase II transcription factor activity, zinc ion binding activity and role in regulation of transcription, DNA-dependent, transcription, DNA-dependent | prot_ID_149  | AO090038000557          |
| n/a                   |                |               |           | Ortholog(s) have UTP:glucose-1-phosphate uridylyltransferase activity and role in (1->6)-beta-D-glucan biosynthetic process, UDP-glucose metabolic process, glycogen biosynthetic process, trehalose biosynthetic process           | prot_ID_836  | AO090038000558          |

## AO090102000166 cluster

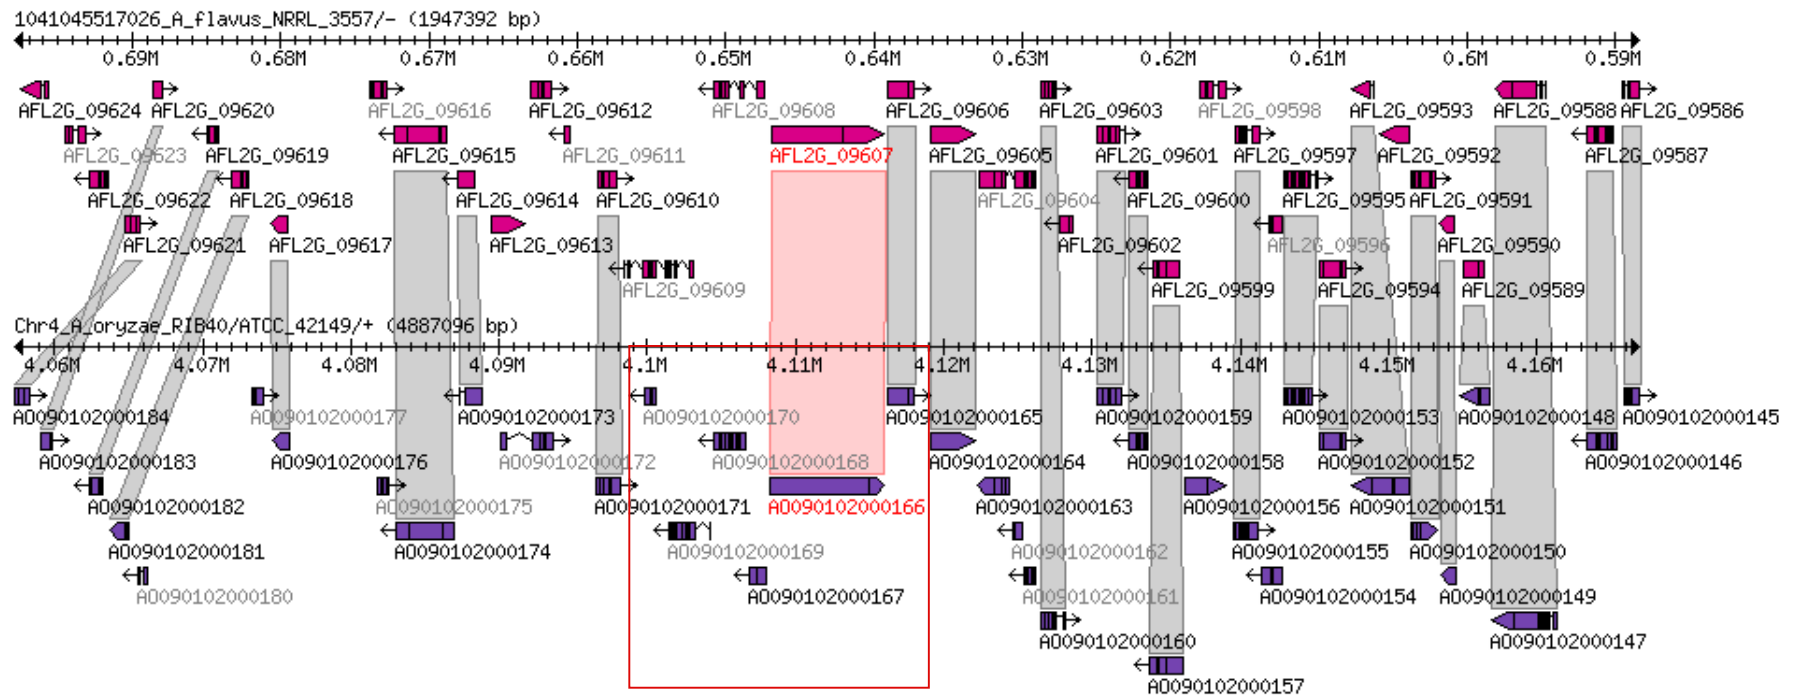

**AO090102000166 cluster**

| Gene id (SMURF)       | Gene positions | Gene distance | Gene Name | Annotated_gene_function                                                                                                                                                                                         | antiSMASH ID | AspGD ID       |    |
|-----------------------|----------------|---------------|-----------|-----------------------------------------------------------------------------------------------------------------------------------------------------------------------------------------------------------------|--------------|----------------|----|
| n/a                   |                |               |           | Ortholog(s) have tRNA adenylyltransferase activity, role in tRNA 3'-terminal CCA addition and mitochondrial matrix localization                                                                                 | prot_ID_1085 | AO090102000157 |    |
| n/a                   |                |               |           | Domain(s) with predicted catalytic activity                                                                                                                                                                     | prot_ID_265  | AO090102000158 |    |
| n/a                   |                |               |           | Domain(s) with predicted catalytic activity and role in trehalose biosynthetic process                                                                                                                          | prot_ID_855  | AO090102000159 |    |
| n/a                   |                |               |           | Domain(s) with predicted calcium ion binding activity                                                                                                                                                           | prot_ID_352  | AO090102000160 |    |
| n/a                   |                |               |           | Domain(s) with predicted nucleotide binding, oxidoreductase activity                                                                                                                                            | prot_ID_1058 | AO090102000161 |    |
| n/a                   |                |               |           | Protein of unknown function                                                                                                                                                                                     | prot_ID_161  | AO090102000162 |    |
| n/a                   |                |               |           | Ortholog of A. nidulans FGSC A4 : AN10927, A. fumigatus Af293 : Afu2g16650, A. niger CBS 513.88 : An04g08670 and A. terreus NIH2624 : ATET_02265                                                                | prot_ID_124  | AO090102000163 |    |
| n/a                   |                |               |           | Ortholog(s) have phosphatidylinositol-3,5-bisphosphate 5-phosphatase activity, role in phosphatidylinositol dephosphorylation and PAS complex, extrinsic to membrane, fungal-type vacuole membrane localization | prot_ID_1318 | AO090102000164 |    |
| n/a                   |                |               |           | Domain(s) with predicted catalytic activity and role in metabolic process                                                                                                                                       | prot_ID_721  | AO090102000165 | FA |
| <b>AO090102000166</b> | 0              | 0             |           | <b>Polyketide synthase</b>                                                                                                                                                                                      | prot_ID_1094 | AO090102000166 |    |
| AO090102000167        | 1              | 615           |           | Ortholog of A. niger CBS 513.88 : An14g03760, A. brasiliensis : Aspbr1_0024828, Aspergillus acidus : Aspfo1_0209024 and A. niger ATCC 1015 : 41772-mRNA                                                         | prot_ID_1244 | AO090102000167 |    |
| AO090102000168        | 2              | 828           |           | Cytochrome P450 monooxygenase                                                                                                                                                                                   | prot_ID_474  | AO090102000168 |    |
| AO090102000169        | 3              | 94            |           | Domain(s) with predicted role in transmembrane transport and integral to membrane localization                                                                                                                  | prot_ID_338  | AO090102000169 |    |
| n/a                   |                |               |           | Protein of unknown function                                                                                                                                                                                     | prot_ID_260  | AO090102000170 | FA |
| n/a                   |                |               |           | Domain(s) with predicted mannan endo-1,6-alpha-mannosidase activity and role in carbohydrate catabolic process                                                                                                  | prot_ID_873  | AO090102000171 |    |
| n/a                   |                |               |           | Acyl-CoA dehydrogenase                                                                                                                                                                                          | prot_ID_67   | AO090102000172 |    |
| n/a                   |                |               |           | Domain(s) with predicted oxidoreductase activity and role in oxidation-reduction process                                                                                                                        | prot_ID_1069 | AO090102000173 |    |
| n/a                   |                |               |           | DNA polymerase delta, catalytic subunit                                                                                                                                                                         | n/a          | AO090102000174 |    |

## AO090102000322 cluster

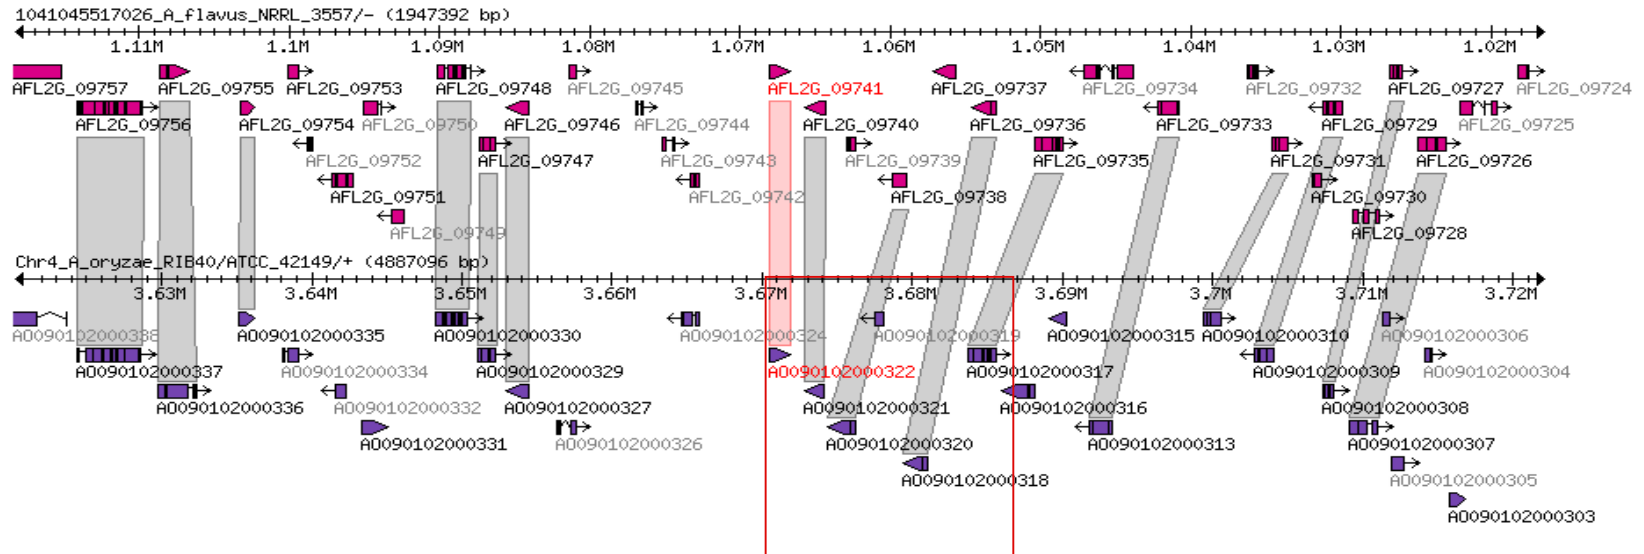

**AO090102000322 cluster**

| Gene id (SMURF)       | Gene positions | Gene distance | Gene Name | Annotated_gene_function                                                                                                                 | antiSMASH ID | AspGD ID       |      |
|-----------------------|----------------|---------------|-----------|-----------------------------------------------------------------------------------------------------------------------------------------|--------------|----------------|------|
| AO090102000316        | -6             | 1368          |           | Domain(s) with predicted nucleotide binding, oxidoreductase activity, zinc ion binding activity and role in oxidation-reduction process | n/a          | AO090102000316 |      |
| AO090102000317        | -5             | 2640          |           | Domain(s) with predicted transporter activity, role in transmembrane transport and integral to membrane localization                    | n/a          | AO090102000317 | IGD  |
| AO090102000318        | -4             | 1275          |           | Domain(s) with predicted transferase activity, transferring phosphorus-containing groups activity                                       | prot_ID_126  | AO090102000318 |      |
| AO090102000319        | -3             | 2092          |           | Protein of unknown function                                                                                                             | prot_ID_1065 | AO090102000319 |      |
| AO090102000320        | -2             | 510           |           | Ortholog of A. flavus NRRL 3357 : AFL2T_09738                                                                                           | prot_ID_1158 | AO090102000320 |      |
| AO090102000321        | -1             | 931           |           | Domain(s) with predicted transferase activity, transferring phosphorus-containing groups activity                                       | prot_ID_522  | AO090102000321 | ECS, |
| <b>AO090102000322</b> | 0              | 0             |           | Dimethylallyl tryptophan synthase (DMAT)                                                                                                | prot_ID_1367 | AO090102000322 | IGD  |
| n/a                   |                |               |           | Protein of unknown function                                                                                                             | prot_ID_44   | AO090102000324 |      |

## AO090102000338 cluster

No match to clusters in other species

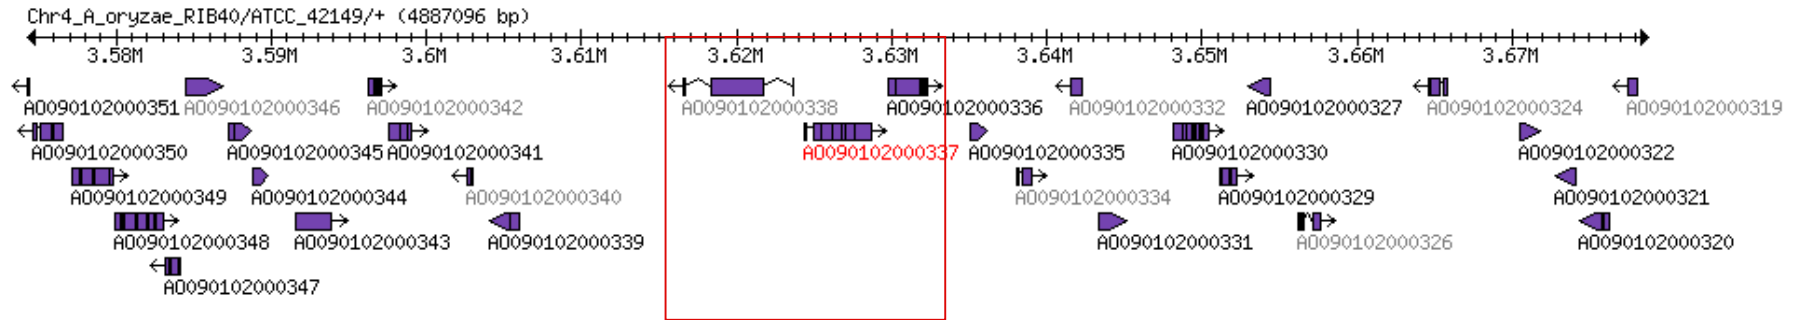

**AO090102000338 cluster**

| Gene id (SMURF)       | Gene positions | Gene distance | Gene Name | Annotated_gene_function                                                                                                                                                                | antiSMASH ID | AspGD ID                |
|-----------------------|----------------|---------------|-----------|----------------------------------------------------------------------------------------------------------------------------------------------------------------------------------------|--------------|-------------------------|
| AO090102000329        | -8             | 794           |           | Domain(s) with predicted nucleotide binding, oxidoreductase activity, zinc ion binding activity and role in oxidation-reduction process                                                | n/a          | AO090102000329          |
| AO090102000330        | -7             | 3197          |           | Cytochrome P450 monooxygenase; involved in 7-hydroxycoumarin production                                                                                                                | n/a          | AO090102000330          |
| AO090102000331        | -6             | 1025          |           | Domain(s) with predicted hydrolase activity, hydrolyzing O-glycosyl compounds activity and role in carbohydrate metabolic process                                                      | prot_ID_820  | AO090102000331          |
| AO090102000332        | -5             | 2750          |           | Protein of unknown function                                                                                                                                                            | prot_ID_568  | AO090102000332          |
| AO090102000334        | -4             | 1952          |           | Protein of unknown function                                                                                                                                                            | prot_ID_424  | AO090102000334          |
| AO090102000335        | -3             | 2892          |           | Domain(s) with predicted phospholipase D activity and role in lipid metabolic process                                                                                                  | prot_ID_162  | AO090102000335          |
| AO090102000336        | -2             | 1021          |           | Domain(s) with predicted catalytic activity                                                                                                                                            | prot_ID_959  | AO090102000336 FA       |
|                       |                |               |           | Domain(s) with predicted ATP binding, ATPase activity, coupled to transmembrane movement of substances activity, role in transmembrane transport and integral to membrane localization |              |                         |
| AO090102000337        | -1             | 622           |           |                                                                                                                                                                                        | prot_ID_664  | AO090102000337          |
| <b>AO090102000338</b> | 0              | 0             |           | <b>Non-ribosomal peptide synthetase</b>                                                                                                                                                | prot_ID_746  | AO090102000338 ECS, IGD |
| n/a                   |                |               |           | Ortholog(s) have role in unsaturated fatty acid biosynthetic process                                                                                                                   | prot_ID_390  | AO090102000339          |
| n/a                   |                |               |           | Protein of unknown function                                                                                                                                                            | prot_ID_987  | AO090102000340          |
|                       |                |               |           | Domain(s) with predicted hydrolase activity, hydrolyzing O-glycosyl compounds activity and role in carbohydrate metabolic process                                                      | prot_ID_1137 | AO090102000341          |
| n/a                   |                |               |           | Protein of unknown function                                                                                                                                                            | prot_ID_696  | AO090102000342          |

## AO090102000465 cluster

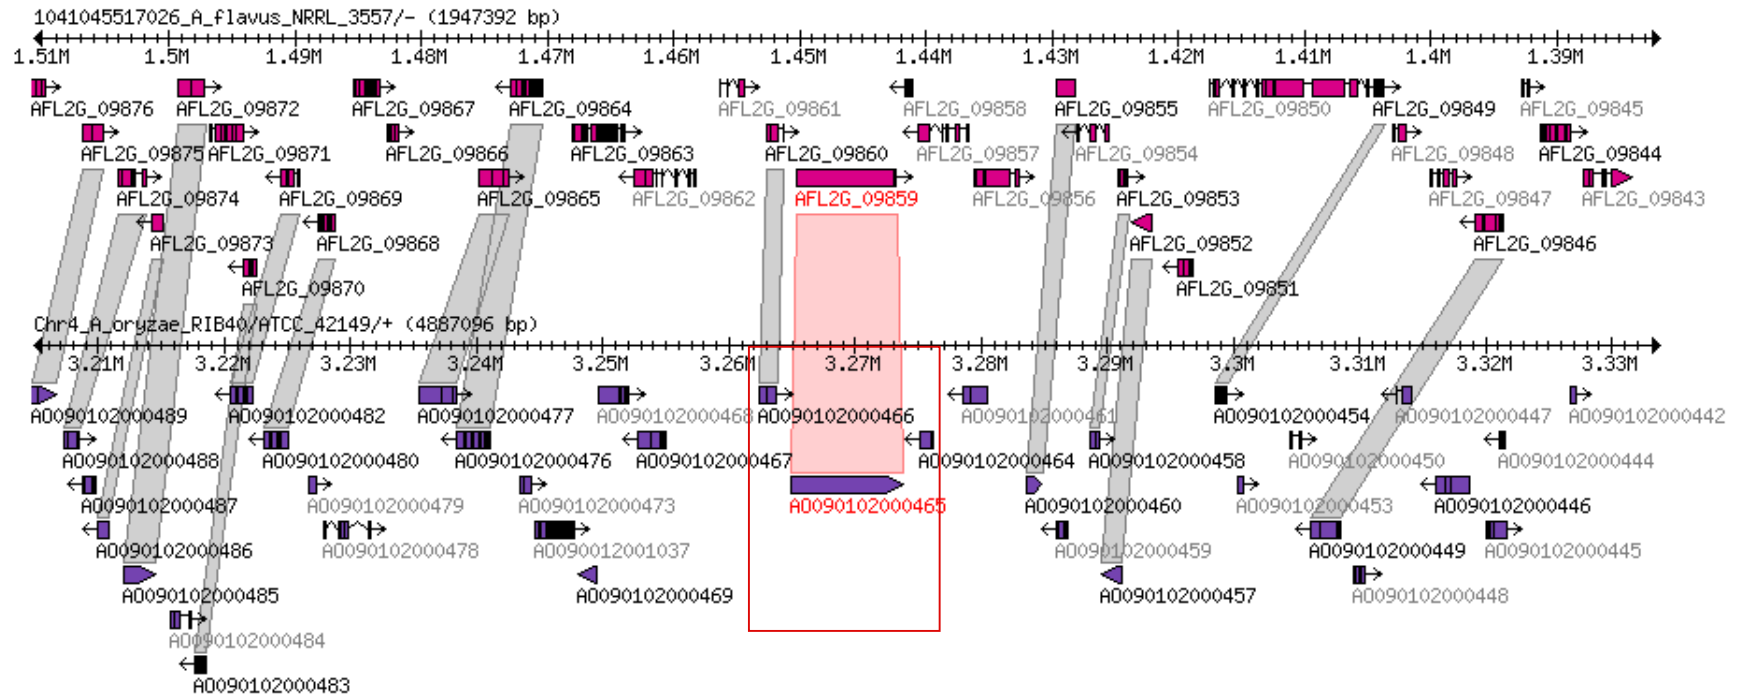



**AO090102000465 cluster**

| Gene id (SMURF)       | Gene positions | Gene distance | Gene Name | Annotated_gene_function                                                                                                                                                                                                                                             | antiSMASH ID | AspGD ID                |
|-----------------------|----------------|---------------|-----------|---------------------------------------------------------------------------------------------------------------------------------------------------------------------------------------------------------------------------------------------------------------------|--------------|-------------------------|
| AO090102000457        | -6             | 86            |           | Domain(s) with predicted UDP-N-acetylmuramate dehydrogenase activity, flavin adenine dinucleotide binding activity and role in oxidation-reduction process                                                                                                          | prot_ID_334  | AO090102000457          |
| AO090102000458        | -5             | 1723          |           | Ortholog of A. flavus NRRL 3357 : AFL2T_09853                                                                                                                                                                                                                       | prot_ID_240  | AO090102000458          |
| AO090102000459        | -4             | 977           |           | Protein of unknown function                                                                                                                                                                                                                                         | prot_ID_1073 | AO090102000459          |
| AO090102000460        | -3             | 3076          |           | Ortholog of A. fumigatus Af293 : Afu8g00530, A. niger CBS 513.88 : An07g00020, An13g03240, A. oryzae RIB40 : AO090009000132, AO090026000248 and A. versicolor : Aspve1_0038561, Aspve1_0043401                                                                      | prot_ID_1005 | AO090102000460          |
| AO090102000461        | -2             | 2563          |           | Domain(s) with predicted catalytic activity and role in nucleoside metabolic process                                                                                                                                                                                | prot_ID_357  | AO090102000461          |
| AO090102000464        | -1             | 1215          |           | Domain(s) with predicted oxidoreductase activity and role in oxidation-reduction process                                                                                                                                                                            | prot_ID_39   | AO090102000464 FA       |
| <b>AO090102000465</b> | 0              | 0             |           | <b>Non-ribosomal peptide synthetase</b><br>Domain(s) with predicted electron carrier activity, heme binding, oxidoreductase activity, acting on paired donors, with incorporation or reduction of molecular oxygen activity and role in oxidation-reduction process | prot_ID_827  | AO090102000465          |
| AO090102000466        | 1              | 925           |           | Ortholog of A. niger CBS 513.88 : An03g03670, A. brasiliensis : Aspbr1_0197056, A. clavatus NRRL 1 : ACLA_097300, A. acidus : Aspfo1_0142332 and A. niger ATCC 1015 : 54686-mRNA                                                                                    | prot_ID_1366 | AO090102000466 ECS, IGD |
| n/a                   |                |               |           | Protein of unknown function                                                                                                                                                                                                                                         | prot_ID_712  | AO090102000467          |
| n/a                   |                |               |           | Ortholog of A. versicolor : Aspve1_0042194 and A. sydowii : Aspsy1_0030438 (2)                                                                                                                                                                                      | prot_ID_512  | AO090102000468          |
| n/a                   |                |               |           | Domain(s) with predicted NAD(P)+ transhydrogenase (AB-specific) activity, NADP binding activity, role in oxidation-reduction process and integral to membrane localization                                                                                          | prot_ID_1008 | AO090102000469          |
| n/a                   |                |               |           |                                                                                                                                                                                                                                                                     | prot_ID_1488 | AO090012001037          |

## A090103000167 cluster

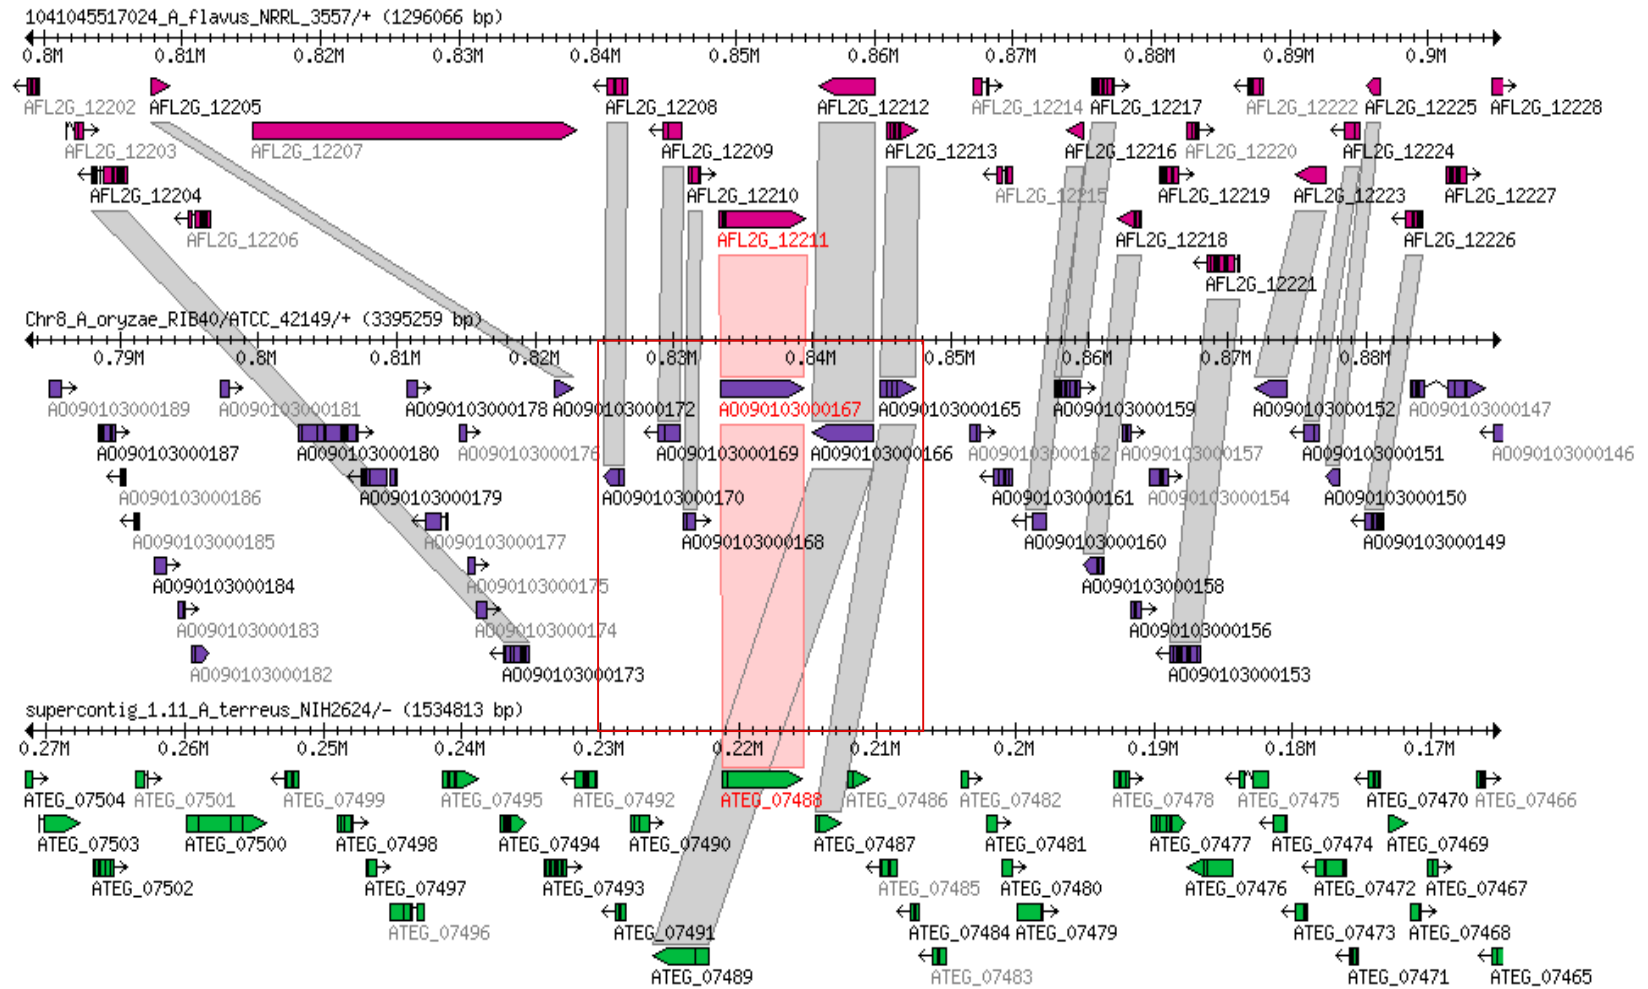

**AO090103000167 cluster**

| Gene id (SMURF)       | Gene positions | Gene distance | Gene Name | Annotated_gene_function                                                                                                                                                                                                             | antiSMASH ID | AspGD ID               |
|-----------------------|----------------|---------------|-----------|-------------------------------------------------------------------------------------------------------------------------------------------------------------------------------------------------------------------------------------|--------------|------------------------|
| n/a                   |                |               |           | Domain(s) with predicted role in transmembrane transport and integral to membrane localization                                                                                                                                      | prot_ID_353  | AO090103000159         |
| n/a                   |                |               |           | Domain(s) with predicted hydrolase activity                                                                                                                                                                                         | prot_ID_199  | AO090103000160         |
| n/a                   |                |               |           | Domain(s) with predicted ATP binding, protein kinase activity and role in protein phosphorylation (2)                                                                                                                               | prot_ID_682  | AO090103000161         |
| AO090103000165        | -2             | 999           |           | Protein of unknown function                                                                                                                                                                                                         | prot_ID_863  | AO090103000162         |
|                       |                |               |           | Ortholog(s) have role in ferric triacetylfusarinine C transport                                                                                                                                                                     | prot_ID_133  | AO090103000165 ECS,IGD |
|                       |                |               |           | Domain(s) with predicted ATP binding, ATPase activity, coupled to transmembrane movement of substances activity, role in transmembrane transport and integral to membrane localization                                              |              |                        |
| AO090103000166        | -1             | 828           |           |                                                                                                                                                                                                                                     | prot_ID_246  | AO090103000166         |
| <b>AO090103000167</b> | 0              | 0             |           | Non-ribosomal peptide synthetase                                                                                                                                                                                                    | prot_ID_711  | AO090103000167         |
|                       |                |               |           | Ortholog(s) have role in N',N'',N'''-triacetylfusarinine C biosynthetic process, cellular response to hydrogen peroxide, cellular response to iron ion starvation, ergosterol biosynthetic process, pathogenesis                    |              |                        |
| AO090103000168        | 1              | 1954          |           |                                                                                                                                                                                                                                     | prot_ID_878  | AO090103000168         |
| AO090103000169        | 2              | 317           |           | Ortholog(s) have role in ergosterol biosynthetic process, siderophore biosynthetic process                                                                                                                                          | prot_ID_300  | AO090103000169         |
|                       |                |               |           | Ortholog of A. nidulans FGSC A4 : AN6239, AN6793, A. fumigatus Af293 : Afu3g03390, Afu7g00330, A. niger CBS 513.88 : An03g03530, A. oryzae RIB40 : AO090701000114 and A. niger ATCC 1015 : 50657-mRNA                               |              |                        |
| AO090103000170        | 3              | 2813          |           |                                                                                                                                                                                                                                     | prot_ID_642  | AO090103000170 ECS     |
| AO090103000172        | 4              | 2250          |           | Domain(s) with predicted triglyceride lipase activity and role in lipid catabolic process                                                                                                                                           | prot_ID_1005 | AO090103000172         |
|                       |                |               |           | Domain(s) with predicted electron carrier activity, heme binding, iron ion binding, monooxygenase activity, oxidoreductase activity, acting on paired donors, with incorporation or reduction of molecular oxygen activity          |              |                        |
| AO090103000173        | 5              | 1882          |           |                                                                                                                                                                                                                                     | prot_ID_48   | AO090103000173         |
| AO090103000174        | 6              | 1194          |           | Protein of unknown function                                                                                                                                                                                                         | prot_ID_461  | AO090103000174         |
| AO090103000175        | 7              | 123           |           | Protein of unknown function                                                                                                                                                                                                         | prot_ID_1050 | AO090103000175         |
| AO090103000176        | 8              | 58            |           | Protein of unknown function                                                                                                                                                                                                         | prot_ID_306  | AO090103000176         |
|                       |                |               |           | Domain(s) with predicted potassium channel activity, role in potassium ion transmembrane transport and membrane localization                                                                                                        |              |                        |
| AO090103000177        | 9              | 866           |           |                                                                                                                                                                                                                                     | prot_ID_840  | AO090103000177         |
| AO090103000178        | 10             | 650           |           | Domain(s) with predicted O-methyltransferase activity                                                                                                                                                                               | n/a          | AO090103000178         |
|                       |                |               |           | Domain(s) with predicted DNA binding, sequence-specific DNA binding RNA polymerase II transcription factor activity, zinc ion binding activity and role in regulation of transcription, DNA-dependent, transcription, DNA-dependent |              |                        |
| AO090103000179        | 11             | 718           |           |                                                                                                                                                                                                                                     | n/a          | AO090103000179         |

## AO090103000224 cluster

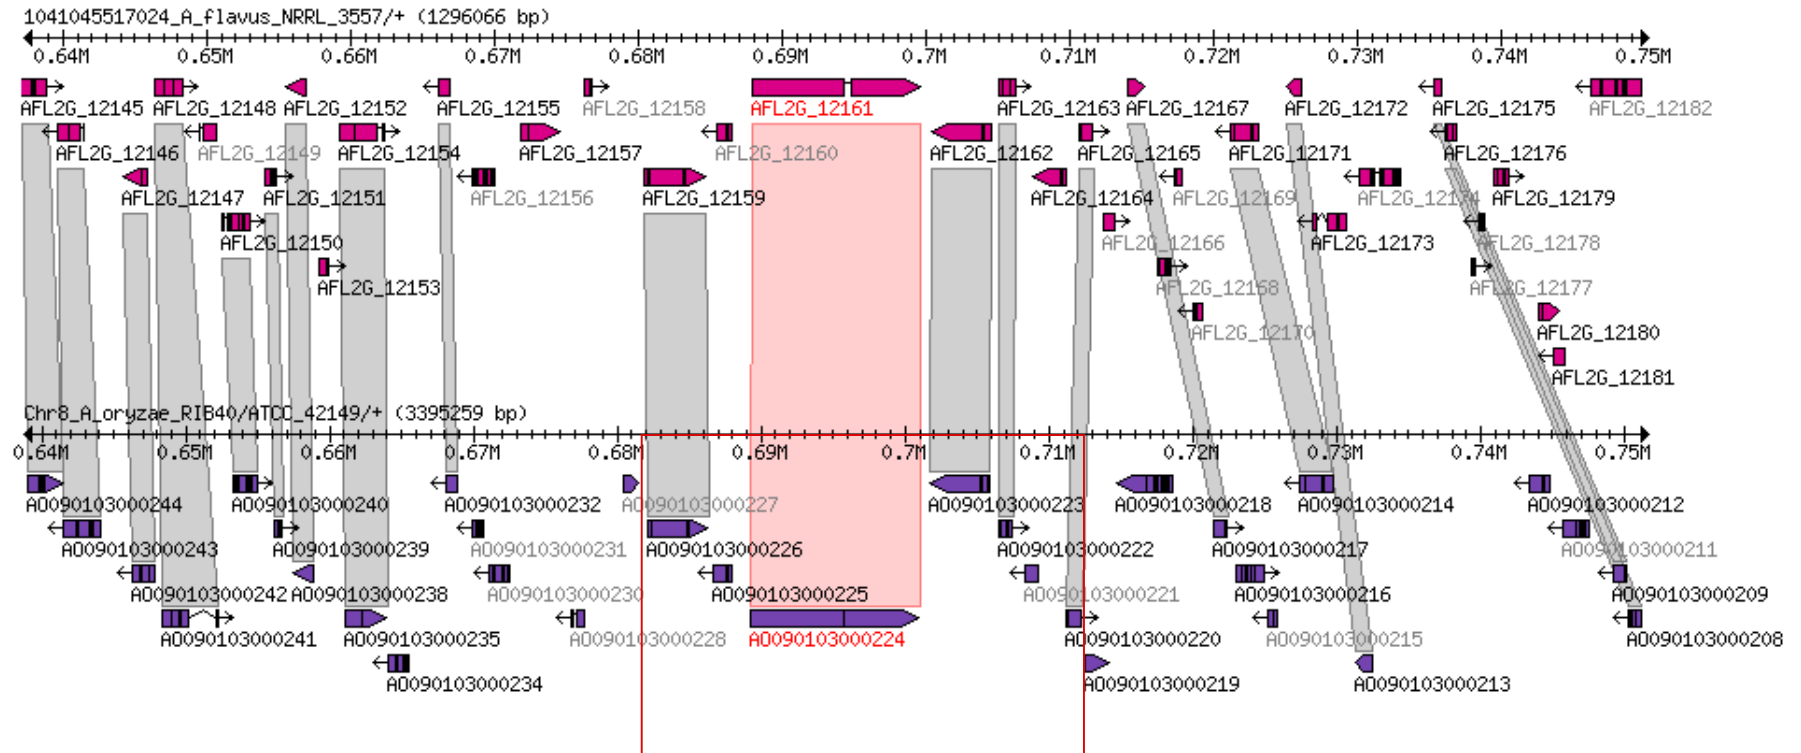

**AO090103000224 cluster**

| Gene id (SMURF)       | Gene positions | Gene distance | Gene Name | Annotated_gene_function                                                                                                                                                                                              | antiSMASH ID | AspGD ID               |
|-----------------------|----------------|---------------|-----------|----------------------------------------------------------------------------------------------------------------------------------------------------------------------------------------------------------------------|--------------|------------------------|
| n/a                   |                |               |           | Protein of unknown function                                                                                                                                                                                          | prot_ID_949  | AO090103000215         |
| n/a                   |                |               |           | Domain(s) with predicted role in cell wall macromolecule catabolic process                                                                                                                                           | prot_ID_450  | AO090103000216         |
| n/a                   |                |               |           | Ortholog of A. flavus NRRL 3357 : AFL2T_12167, A. acidus : Aspfo1_0058137, A. terreus NIH2624 : ATET_09175 and A. carbonarius ITEM 5010 : Acar5010_203830                                                            | prot_ID_1057 | AO090103000217         |
| n/a                   |                |               |           | Domain(s) with predicted cation binding, chitin binding, chitinase activity and role in carbohydrate metabolic process, chitin catabolic process                                                                     | prot_ID_607  | AO090103000218         |
| n/a                   |                |               |           | Ortholog of A. sydowii : Aspsy1_0046555                                                                                                                                                                              | prot_ID_135  | AO090103000219         |
| n/a                   |                |               |           | Domain(s) with predicted nucleotide binding, oxidoreductase activity, transferase activity, transferring acyl groups other than amino-acyl groups, zinc ion binding activity and role in oxidation-reduction process | prot_ID_973  | AO090103000220 ECS, FA |
| n/a                   |                |               |           | Protein of unknown function                                                                                                                                                                                          | prot_ID_486  | AO090103000221         |
| AO090103000222        | -2             | 554           |           | Ortholog(s) have role in endocrocin biosynthetic process                                                                                                                                                             | prot_ID_931  | AO090103000222         |
| AO090103000223        | -1             | 732           |           | Non-ribosomal peptide synthetase                                                                                                                                                                                     | prot_ID_365  | AO090103000223         |
| <b>AO090103000224</b> | 0              | 0             |           | Polyketide synthase                                                                                                                                                                                                  | prot_ID_141  | AO090103000224         |
| AO090103000225        | 1              | 1360          |           | Isopenicillin N synthase and related dioxygenases family protein                                                                                                                                                     | prot_ID_560  | AO090103000225         |
| AO090103000226        | 2              | 387           |           | Ortholog(s) have plasma membrane localization                                                                                                                                                                        | prot_ID_93   | AO090103000226 ECS     |
| AO090103000227        | 3              | 968           |           | Domain(s) with predicted N-acetyltransferase activity and role in metabolic process                                                                                                                                  | prot_ID_979  | AO090103000227         |
| n/a                   |                |               |           | Protein of unknown function                                                                                                                                                                                          | prot_ID_503  | AO090103000228         |
| n/a                   |                |               |           | Protein of unknown function                                                                                                                                                                                          | prot_ID_1036 | AO090103000230         |
| n/a                   |                |               |           | Protein of unknown function                                                                                                                                                                                          | prot_ID_289  | AO090103000231         |

## AO090103000355 cluster

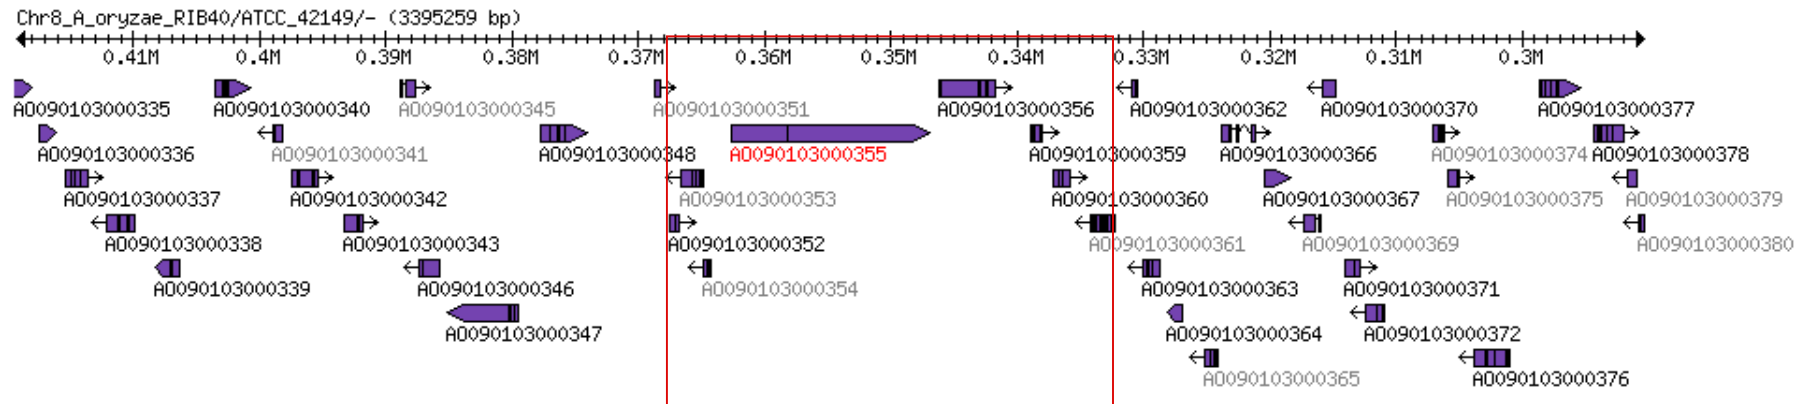

**AO090103000355 cluster**

| Gene id (SMURF)       | Gene positions | Gene distance | Gene Name | Annotated_gene_function                                                                                                                                                                | antiSMASH ID | AspGD ID          |
|-----------------------|----------------|---------------|-----------|----------------------------------------------------------------------------------------------------------------------------------------------------------------------------------------|--------------|-------------------|
| n/a                   |                |               |           | Ortholog(s) have DNA topoisomerase (ATP-hydrolyzing) activity                                                                                                                          | prot_ID_505  | AO090103000347    |
| n/a                   |                |               |           | Domain(s) with predicted Rab GTPase activator activity, role in regulation of Rab GTPase activity and intracellular localization                                                       | prot_ID_94   | AO090103000348    |
| n/a                   |                |               |           | Protein of unknown function                                                                                                                                                            | prot_ID_1061 | AO090103000351    |
| n/a                   |                |               |           | Ortholog(s) have role in asperfuranone biosynthetic process                                                                                                                            | prot_ID_474  | AO090103000352 FA |
| n/a                   |                |               |           | Domain(s) with predicted asparagine synthase (glutamine-hydrolyzing) activity and role in asparagine biosynthetic process                                                              | prot_ID_100  | AO090103000353    |
| n/a                   |                |               |           | Protein of unknown function                                                                                                                                                            | prot_ID_583  | AO090103000354    |
| <b>AO090103000355</b> | 0              | 0             |           | Non-ribosomal peptide synthetase                                                                                                                                                       | prot_ID_24   | AO090103000355    |
|                       |                |               |           | Domain(s) with predicted ATP binding, ATPase activity, coupled to transmembrane movement of substances activity, role in transmembrane transport and integral to membrane localization | prot_ID_835  | AO090103000356    |
| AO090103000356        | 1              | 724           |           |                                                                                                                                                                                        | prot_ID_593  | AO090103000359    |
| AO090103000359        | 2              | 2696          |           | Putative reductase                                                                                                                                                                     | prot_ID_792  | AO090103000360    |
| AO090103000360        | 3              | 987           |           | Domain(s) with predicted role in lipid metabolic process                                                                                                                               |              |                   |
|                       |                |               |           | Domain(s) with predicted N,N-dimethylaniline monooxygenase activity, NADP binding, flavin adenine dinucleotide binding activity and role in oxidation-reduction process                | prot_ID_192  | AO090103000361 FA |
| AO090103000361        | 4              | 1541          |           |                                                                                                                                                                                        |              |                   |
|                       |                |               |           | Ortholog of A. nidulans FGSC A4 : AN5401, A. fumigatus Af293 : Afu6g13860, A. niger CBS 513.88 : An08g08500, A. niger ATCC 1015 : 38052-mRNA and A. versicolor : Aspve1_0045294        | prot_ID_280  | AO090103000362    |
| AO090103000362        | 5              | 1221          |           |                                                                                                                                                                                        |              |                   |
|                       |                |               |           | Ortholog of A. niger CBS 513.88 : An14g02060, A. oryzae RIB40 : AO090012000688, A. niger ATCC 1015 : 41629-mRNA and A. terreus NIH2624 : ATET_08602, ATET_08920                        | prot_ID_1025 | AO090103000363    |
| AO090103000363        | 6              | 445           |           |                                                                                                                                                                                        |              |                   |
|                       |                |               |           | Ortholog of A. flavus NRRL 3357 : AFL2T_12033 and A. fumigatus A1163 : AFUB_102210                                                                                                     | prot_ID_435  | AO090103000364    |
| AO090103000364        | 7              | 676           |           |                                                                                                                                                                                        | n/a          | AO090103000365    |
| AO090103000365        | 8              | 1796          |           | Protein of unknown function                                                                                                                                                            |              |                   |
|                       |                |               |           | Domain(s) with predicted nucleotide binding, oxidoreductase activity and role in oxidation-reduction process                                                                           | n/a          | AO090103000366    |
| AO090103000366        | 9              | 395           |           |                                                                                                                                                                                        |              |                   |

## AO090113000209 cluster

No cluster prediction made, end of genome sequence

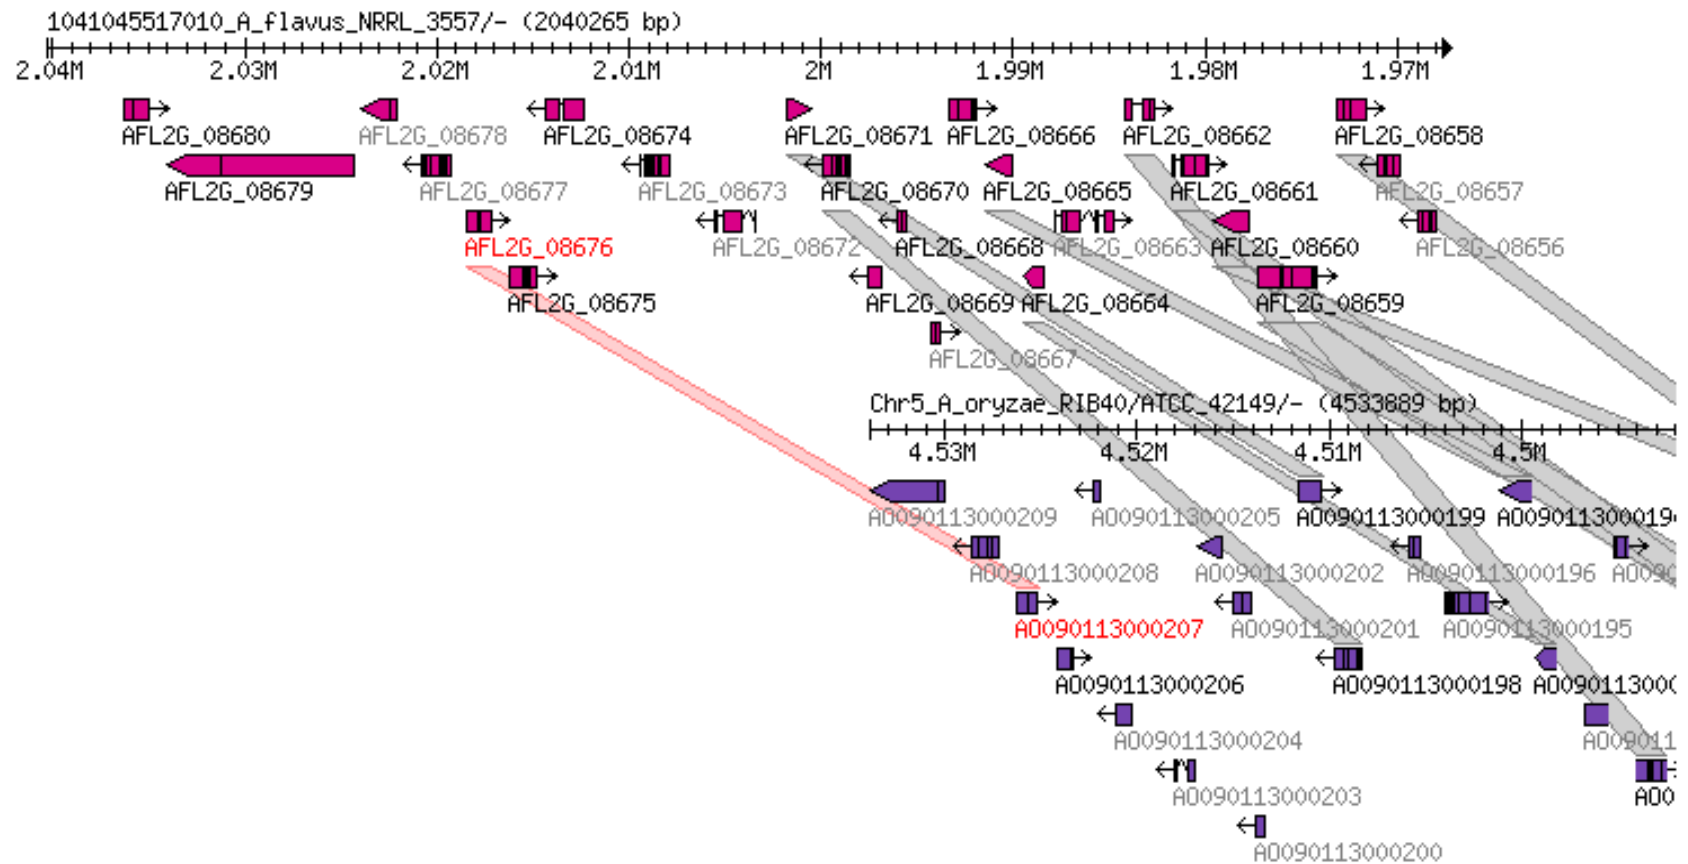



**AO090113000209 cluster**

| Gene id (SMURF)       | Gene positions | Gene distance | Gene Name | Annotated_gene_function                                                                                                                                                                                                                    | antiSMASH ID | AspGD ID       |
|-----------------------|----------------|---------------|-----------|--------------------------------------------------------------------------------------------------------------------------------------------------------------------------------------------------------------------------------------------|--------------|----------------|
| n/a                   |                |               |           | Domain(s) with predicted role in transmembrane transport and integral to membrane localization                                                                                                                                             | prot_ID_11   | AO090113000208 |
| <b>AO090113000209</b> | 0              | 0             |           | Polyketide synthase                                                                                                                                                                                                                        | prot_ID_1441 | AO090113000209 |
| AO090113000208        | 1              | 1491          |           | Domain(s) with predicted role in transmembrane transport and integral to membrane localization                                                                                                                                             | prot_ID_11   | AO090113000208 |
| AO090113000207        | 2              | 941           |           | Domain(s) with predicted electron carrier activity, heme binding, iron ion binding, oxidoreductase activity, acting on paired donors, with incorporation or reduction of molecular oxygen activity and role in oxidation-reduction process | prot_ID_793  | AO090113000207 |
| AO090113000206        | 3              | 945           |           | Domain(s) with predicted monooxygenase activity and role in oxidation-reduction process                                                                                                                                                    | prot_ID_209  | AO090113000206 |
| AO090113000205        | 4              | 1040          |           | Protein of unknown function                                                                                                                                                                                                                | prot_ID_1016 | AO090113000205 |
| AO090113000204        | 5              | 820           |           | Domain(s) with predicted sequence-specific DNA binding RNA polymerase II transcription factor activity, zinc ion binding activity, role in regulation of transcription, DNA-dependent and nucleus localization                             | prot_ID_1414 | AO090113000204 |
| n/a                   |                |               |           | Protein of unknown function                                                                                                                                                                                                                | prot_ID_425  | AO090113000203 |
| n/a                   |                |               |           | Protein of unknown function                                                                                                                                                                                                                | prot_ID_715  | AO090113000202 |
| n/a                   |                |               |           | Protein of unknown function                                                                                                                                                                                                                | prot_ID_98   | AO090113000201 |
| n/a                   |                |               |           | Domain(s) with predicted ACP phosphopantetheine attachment site binding involved in fatty acid biosynthetic process activity                                                                                                               | prot_ID_1002 | AO090113000200 |
| n/a                   |                |               |           | Ortholog(s) have hydrolase activity, acting on glycosyl bonds activity and role in carbohydrate catabolic process                                                                                                                          | prot_ID_251  | AO090113000199 |

## AO9012000024 cluster

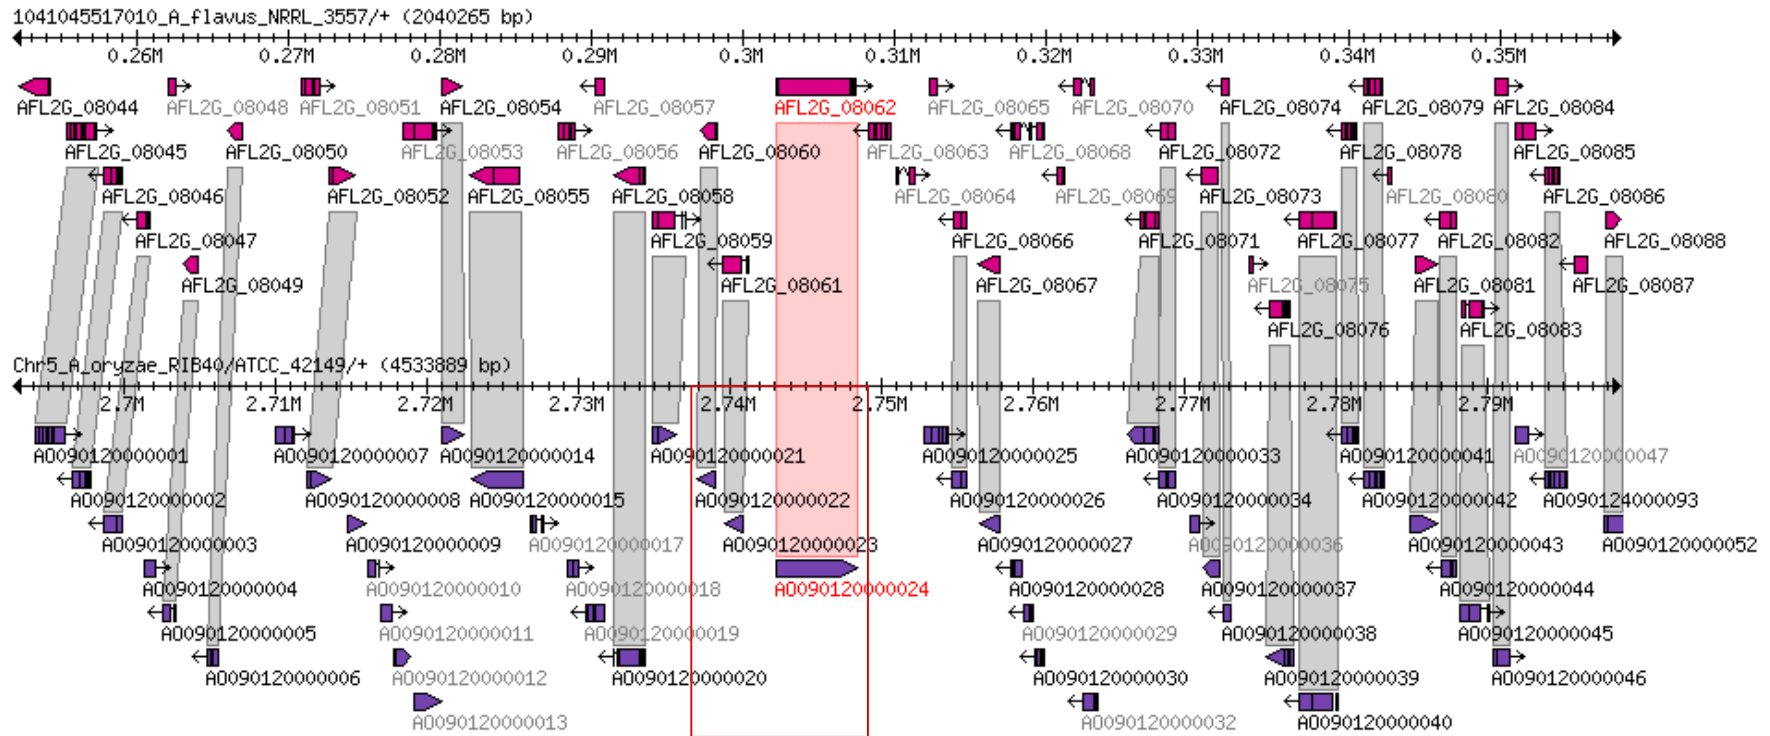

**AO09012000024 cluster**

| Gene id (SMURF)      | Gene positions | Gene distance | Gene Name | Annotated_gene_function                                                                                                                                                                                                                                                  | antiSMASH ID | AspGD ID              |
|----------------------|----------------|---------------|-----------|--------------------------------------------------------------------------------------------------------------------------------------------------------------------------------------------------------------------------------------------------------------------------|--------------|-----------------------|
| n/a                  |                |               |           | Ortholog(s) have role in postreplication repair and Smc5-Smc6 complex, nucleus localization                                                                                                                                                                              | prot_ID_773  | AO09012000033         |
| n/a                  |                |               |           | Protein of unknown function                                                                                                                                                                                                                                              | prot_ID_322  | AO09012000032         |
| n/a                  |                |               |           | Domain(s) with predicted ATP binding, protein kinase activity and role in protein phosphorylation                                                                                                                                                                        | prot_ID_432  | AO09012000030         |
| n/a                  |                |               |           | Domain(s) with predicted ATP binding, protein kinase activity and role in protein phosphorylation                                                                                                                                                                        | prot_ID_1366 | AO09012000029         |
| n/a                  |                |               |           | Ortholog of A. fumigatus Af293 : Afu1g16350, A. niger CBS 513.88 : An12g03130, A. brasiliensis : Aspbr1_0058727, A. niger ATCC 1015 : 189755-mRNA and N. fischeri NRRL 181 : NFIA_009090                                                                                 | prot_ID_918  | AO09012000028         |
| n/a                  |                |               |           | Ortholog of A. nidulans FGSC A4 : AN3302, A. niger CBS 513.88 : An01g01010, A. versicolor : Aspve1_0061419 and A. sydowii : Aspsy1_0043459                                                                                                                               | prot_ID_1191 | AO09012000027         |
| n/a                  |                |               |           | Xylanase G2, major endo-1,4-beta-xylanase with role in xylan degradation; predicted secretion signal peptide; positively regulated by XlnR; 3 putative XlnR binding sites in promoter; produced in the submerged but not solid culture                                   | prot_ID_95   | AO09012000026         |
| n/a                  |                |               |           | Putative MFS transporter; positively regulated by XlnR; 1 putative XlnR binding site in the promoter                                                                                                                                                                     | prot_ID_711  | AO09012000025         |
| <b>AO09012000024</b> | 0              | 0             |           | <b>Non-ribosomal peptide synthetase</b><br>Ortholog(s) have dimethylallyltransferase activity, peptidase activity, tryptophan dimethylallyltransferase activity and role in ergot alkaloid biosynthetic process, protein prenylation, shamixanthone biosynthetic process | prot_ID_566  | AO09012000024 ECS     |
| AO09012000023        | 1              | 2289          |           | Ortholog of A. nidulans FGSC A4 : AN0788, A. niger CBS 513.88 : An09g02430, An03g05960, An09g00710, An09g01710 and A. oryzae RIB40 : AO090003000250, AO090010000570, AO090023000882, AO090012000900                                                                      | prot_ID_870  | AO09012000023         |
| AO09012000022        | 2              | 673           |           |                                                                                                                                                                                                                                                                          | prot_ID_1248 | AO09012000022 FA, ECS |
| AO09012000021        | 3              | 1443          |           | Ortholog(s) have myo-inositol transmembrane transporter activity, role in myo-inositol transport and plasma membrane localization                                                                                                                                        | prot_ID_378  | AO09012000021         |
| AO09012000020        | 4              | 513           |           | Domain(s) with predicted sequence-specific DNA binding RNA polymerase II transcription factor activity, zinc ion binding activity, role in regulation of transcription, DNA-dependent and nucleus localization                                                           | prot_ID_243  | AO09012000020         |
| n/a                  |                |               |           | Protein of unknown function                                                                                                                                                                                                                                              | prot_ID_1224 | AO09012000019         |
| n/a                  |                |               |           | Domain(s) with predicted oxidoreductase activity and role in oxidation-reduction process                                                                                                                                                                                 | prot_ID_1100 | AO09012000018         |
| n/a                  |                |               |           | Protein of unknown function                                                                                                                                                                                                                                              | prot_ID_626  | AO09012000017         |
| n/a                  |                |               |           | Ortholog of A. flavus NRRL 3357 : AFL2T_08055                                                                                                                                                                                                                            | prot_ID_65   | AO09012000015         |

|     |                                                                                          |             |                |
|-----|------------------------------------------------------------------------------------------|-------------|----------------|
| n/a | Domain(s) with predicted oxidoreductase activity and role in oxidation-reduction process | prot_ID_295 | AO090120000014 |
| n/a | Protein of unknown function                                                              | prot_ID_926 | AO090120000013 |

## AO09012400040 cluster

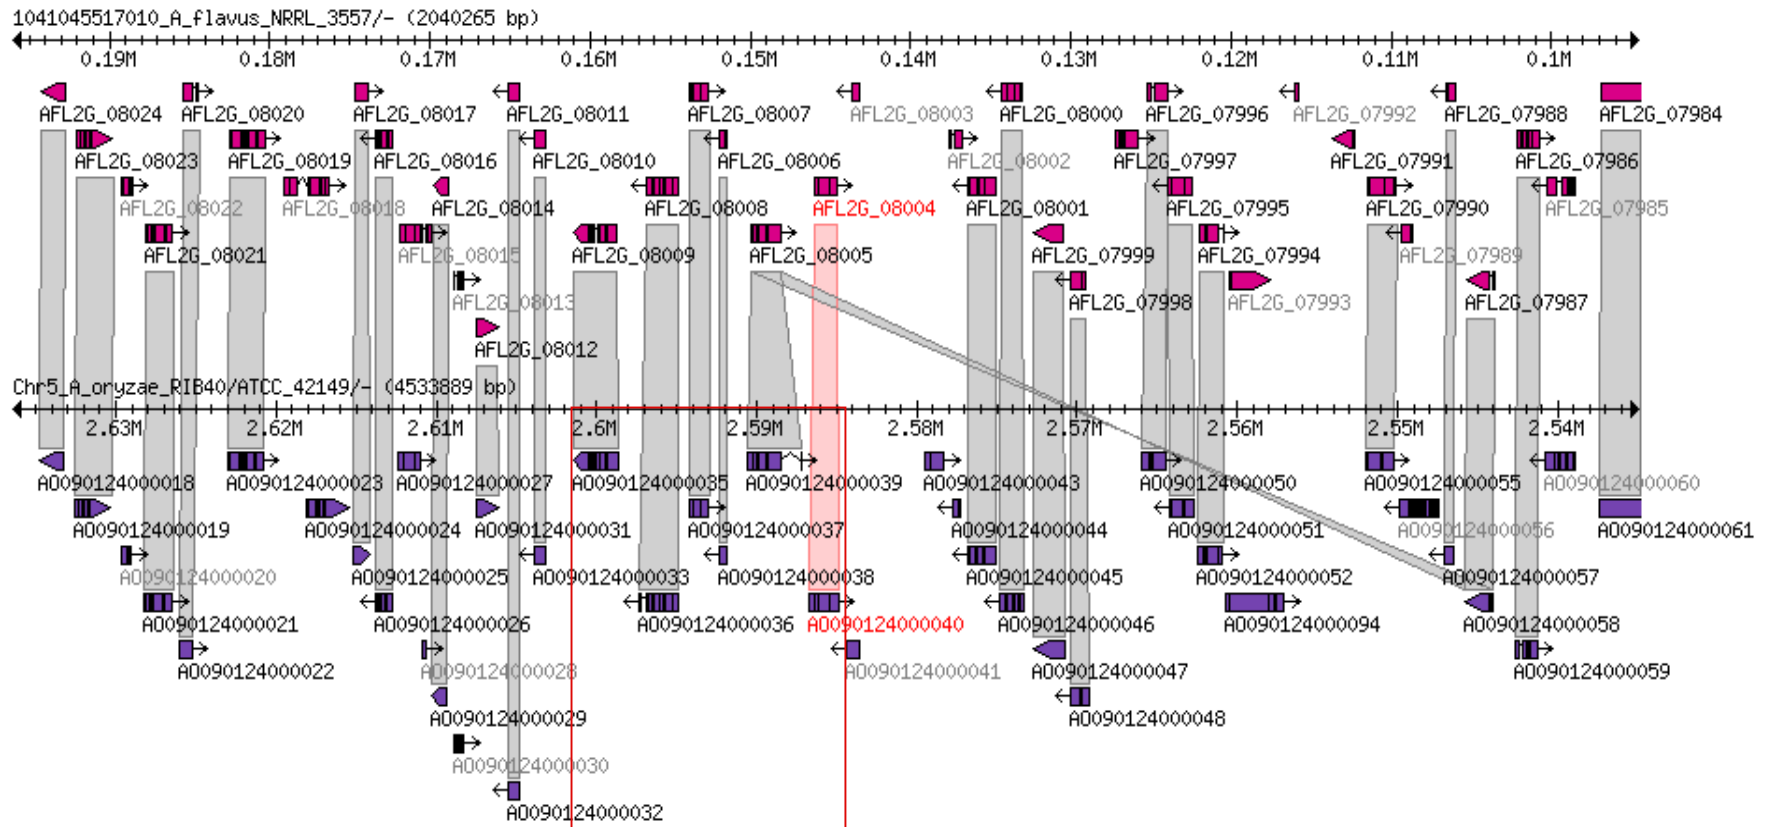

**AO09012400040 cluster**

| Gene id (SMURF) | Gene positions | Gene distance | Gene Name | Annotated_gene_function                                                                                                                                                                                    | antiSMASH ID | AspGD ID               |
|-----------------|----------------|---------------|-----------|------------------------------------------------------------------------------------------------------------------------------------------------------------------------------------------------------------|--------------|------------------------|
| n/a             |                |               |           | Ortholog(s) have ferric-chelate reductase activity, role in cellular response to iron ion starvation, siderophore transport and plasma membrane localization                                               | prot_ID_282  | AO090124000035 ECS, FA |
| n/a             |                |               |           | Ortholog(s) have ferroxidase activity, hydroquinone:oxygen oxidoreductase activity, iron ion transmembrane transporter activity                                                                            | prot_ID_803  | AO090124000036         |
| n/a             |                |               |           | Ortholog(s) have iron ion transmembrane transporter activity, role in high-affinity iron ion transport, iron assimilation by reduction and transport and high affinity iron permease complex localization  | prot_ID_28   | AO090124000037         |
| n/a             |                |               |           | Ortholog of A. flavus NRRL 3357 : AFL2T_08006                                                                                                                                                              | prot_ID_335  | AO090124000038         |
| n/a             |                |               |           | Domain(s) with predicted amino acid transmembrane transporter activity, role in amino acid transmembrane transport and membrane localization                                                               | prot_ID_1362 | AO090124000039         |
| n/a             |                |               |           | Type III polyketide synthase, involved in biosynthesis of 3,5-dihydroxybenzoic acid                                                                                                                        | prot_ID_482  | AO090124000040 ECS     |
| n/a             |                |               |           | Protein of unknown function                                                                                                                                                                                | prot_ID_1205 | AO090124000041         |
| n/a             |                |               |           | Ortholog of A. nidulans FGSC A4 : AN2922, AN1515, AN7536, A. niger CBS 513.88 : An12g10030, A. oryzae RIB40 : AO090701000305, AO090102000038 and A. niger ATCC 1015 : 55190-mRNA                           | prot_ID_1050 | AO090124000043         |
| n/a             |                |               |           | Ortholog of A. nidulans FGSC A4 : AN12089, A. niger CBS 513.88 : An11g02070, A. oryzae RIB40 : AO090005000192 and A. brasiliensis : Aspbr1_0032040, Aspbr1_0036822, Aspbr1_0439362                         | prot_ID_655  | AO090124000044         |
| n/a             |                |               |           | Ortholog of A. niger CBS 513.88 : An01g00290, A. versicolor : Aspve1_0025846, Aspve1_0086138 and A. sydowii : Aspsy1_0039665, Aspsy1_0046567, Aspsy1_0092019                                               | prot_ID_1088 | AO090124000045         |
| n/a             |                |               |           | Has domain(s) with predicted phosphatase activity and role in metabolic process                                                                                                                            | prot_ID_791  | AO090124000046         |
| n/a             |                |               |           | Has domain(s) with predicted carboxy-lyase activity, magnesium ion binding, thiamine pyrophosphate binding activity                                                                                        | prot_ID_1298 | AO090124000047         |
| n/a             |                |               |           | Ortholog of A. fumigatus Af293 : Afu3g03950, N. fischeri NRRL 181 : NFIA_006240, Aspergillus flavus NRRL 3357 : AFL2T_07998, A. clavatus NRRL 1 : ACLA_060790 and Aspergillus terreus NIH2624 : ATET_02877 | prot_ID_1010 | AO090124000048         |

## AO09020600074 cluster

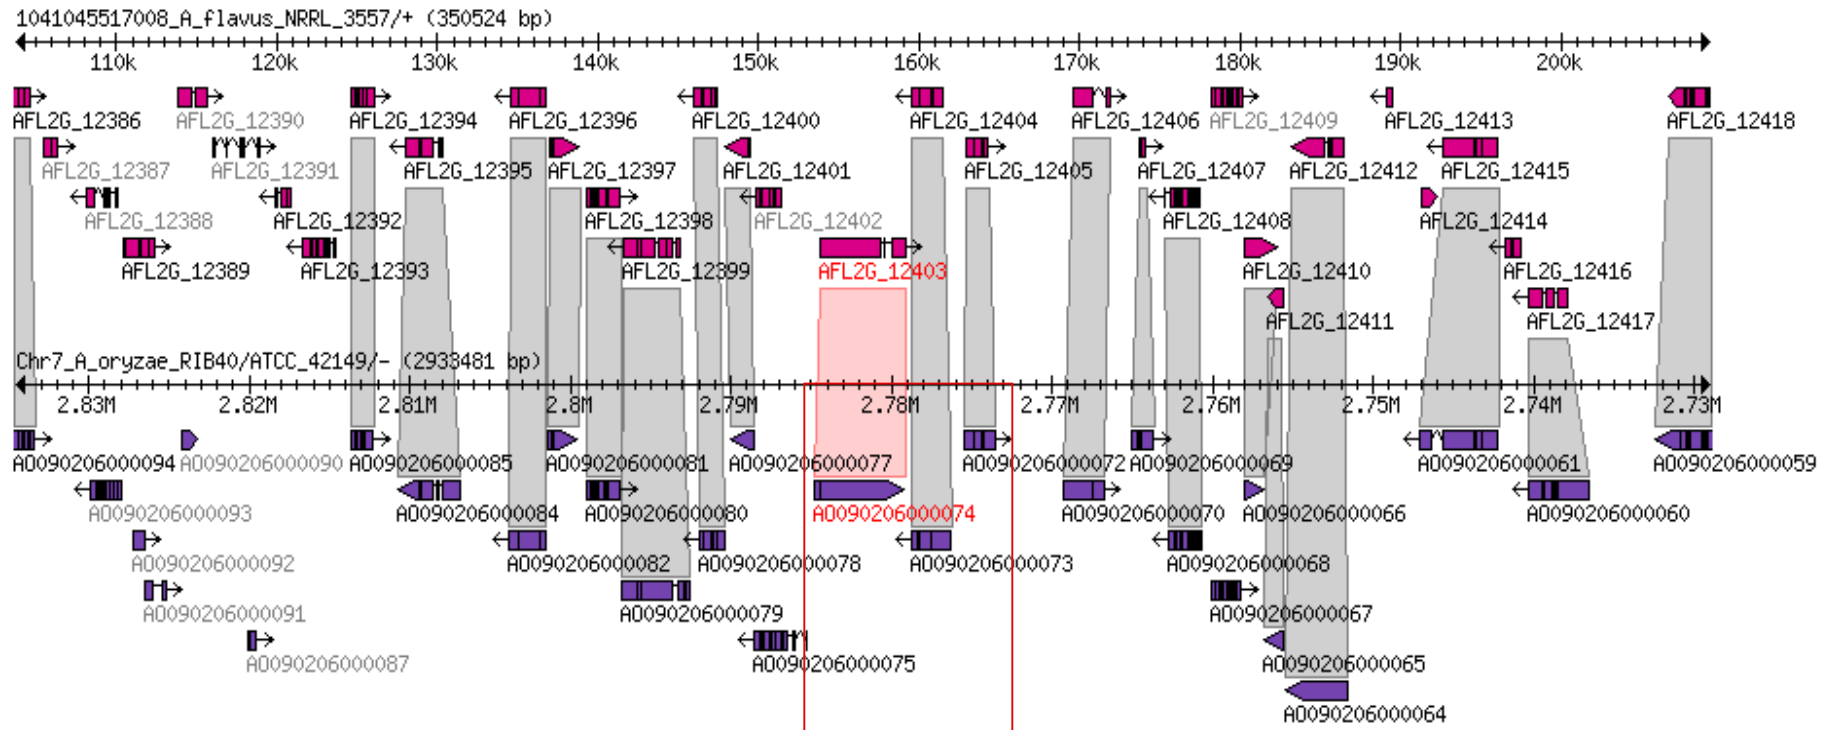

**AO09020600074 cluster**

| Gene id (SMURF)       | Gene positions | Gene distance | Gene Name | Annotated_gene_function                                                                                                                                                                                                                    | antiSMASH ID | AspGD ID       |          |
|-----------------------|----------------|---------------|-----------|--------------------------------------------------------------------------------------------------------------------------------------------------------------------------------------------------------------------------------------------|--------------|----------------|----------|
| n/a                   |                |               |           | Ortholog(s) have role in mRNA splicing, via spliceosome and nucleus, transcriptionally active chromatin localization                                                                                                                       | prot_ID_727  | AO090206000082 |          |
| n/a                   |                |               |           | Ortholog(s) have ubiquitin binding activity, role in negative regulation of transcription from RNA polymerase II promoter by glucose, protein retention in Golgi apparatus, protein targeting to vacuole and ESCRT II complex localization | prot_ID_417  | AO090206000081 |          |
| n/a                   |                |               |           | Domain(s) with predicted carbon-nitrogen ligase activity, with glutamine as amido-N-donor, hydrolase activity, acting on carbon-nitrogen (but not peptide) bonds, in linear amides activity                                                | prot_ID_59   | AO090206000080 |          |
| n/a                   |                |               |           | Ortholog(s) have chitin synthase activity                                                                                                                                                                                                  | prot_ID_619  | AO090206000079 |          |
| n/a                   |                |               |           | Ortholog of A. nidulans FGSC A4 : AN7033, A. fumigatus Af293 : Afu4g04190, A. niger CBS 513.88 : An14g00640, A. niger ATCC 1015 : 201359-mRNA and A. versicolor : Aspve1_0075847                                                           | prot_ID_234  | AO090206000078 |          |
| n/a                   |                |               |           | Domain(s) with predicted role in phosphatidylinositol phosphorylation                                                                                                                                                                      | prot_ID_775  | AO090206000077 |          |
| AO090206000075        | -1             | 829           |           | Cytochrome P450 monooxygenase                                                                                                                                                                                                              | prot_ID_873  | AO090206000075 |          |
| <b>AO090206000074</b> | 0              | 0             |           | <b>Polyketide synthase</b>                                                                                                                                                                                                                 | prot_ID_21   | AO090206000074 | ECS, IGD |
| n/a                   |                |               |           | <b>Putative protease</b>                                                                                                                                                                                                                   | prot_ID_564  | AO090206000073 |          |
| n/a                   |                |               |           | Ortholog of A. nidulans FGSC A4 : AN7025, A. fumigatus Af293 : Afu4g04220, A. niger ATCC 1015 : 41507-mRNA, A. versicolor : Aspve1_0088114 and A. sydowii : Aspsy1_0060635                                                                 | prot_ID_155  | AO090206000072 | ECS, IGD |
| n/a                   |                |               |           | Ortholog of A. nidulans FGSC A4 : AN7026, A. fumigatus Af293 : Afu4g04230, A. niger CBS 513.88 : An14g00600, A. niger ATCC 1015 : 41506-mRNA and A. versicolor : Aspve1_0140914                                                            | prot_ID_770  | AO090206000070 |          |
| n/a                   |                |               |           | Ortholog of A. nidulans FGSC A4 : AN11541, A. versicolor : Aspve1_0140562, A. sydowii : Aspsy1_0158387 and A. terreus NIH2624 : ATET_10112                                                                                                 | prot_ID_474  | AO090206000069 |          |
| n/a                   |                |               |           | Domain(s) with predicted role in transmembrane transport and integral to membrane localization                                                                                                                                             | prot_ID_596  | AO090206000068 |          |
| n/a                   |                |               |           | Domain(s) with predicted queuine tRNA-ribosyltransferase activity and role in queuosine biosynthetic process                                                                                                                               | prot_ID_201  | AO090206000067 |          |



## A090701000530 cluster

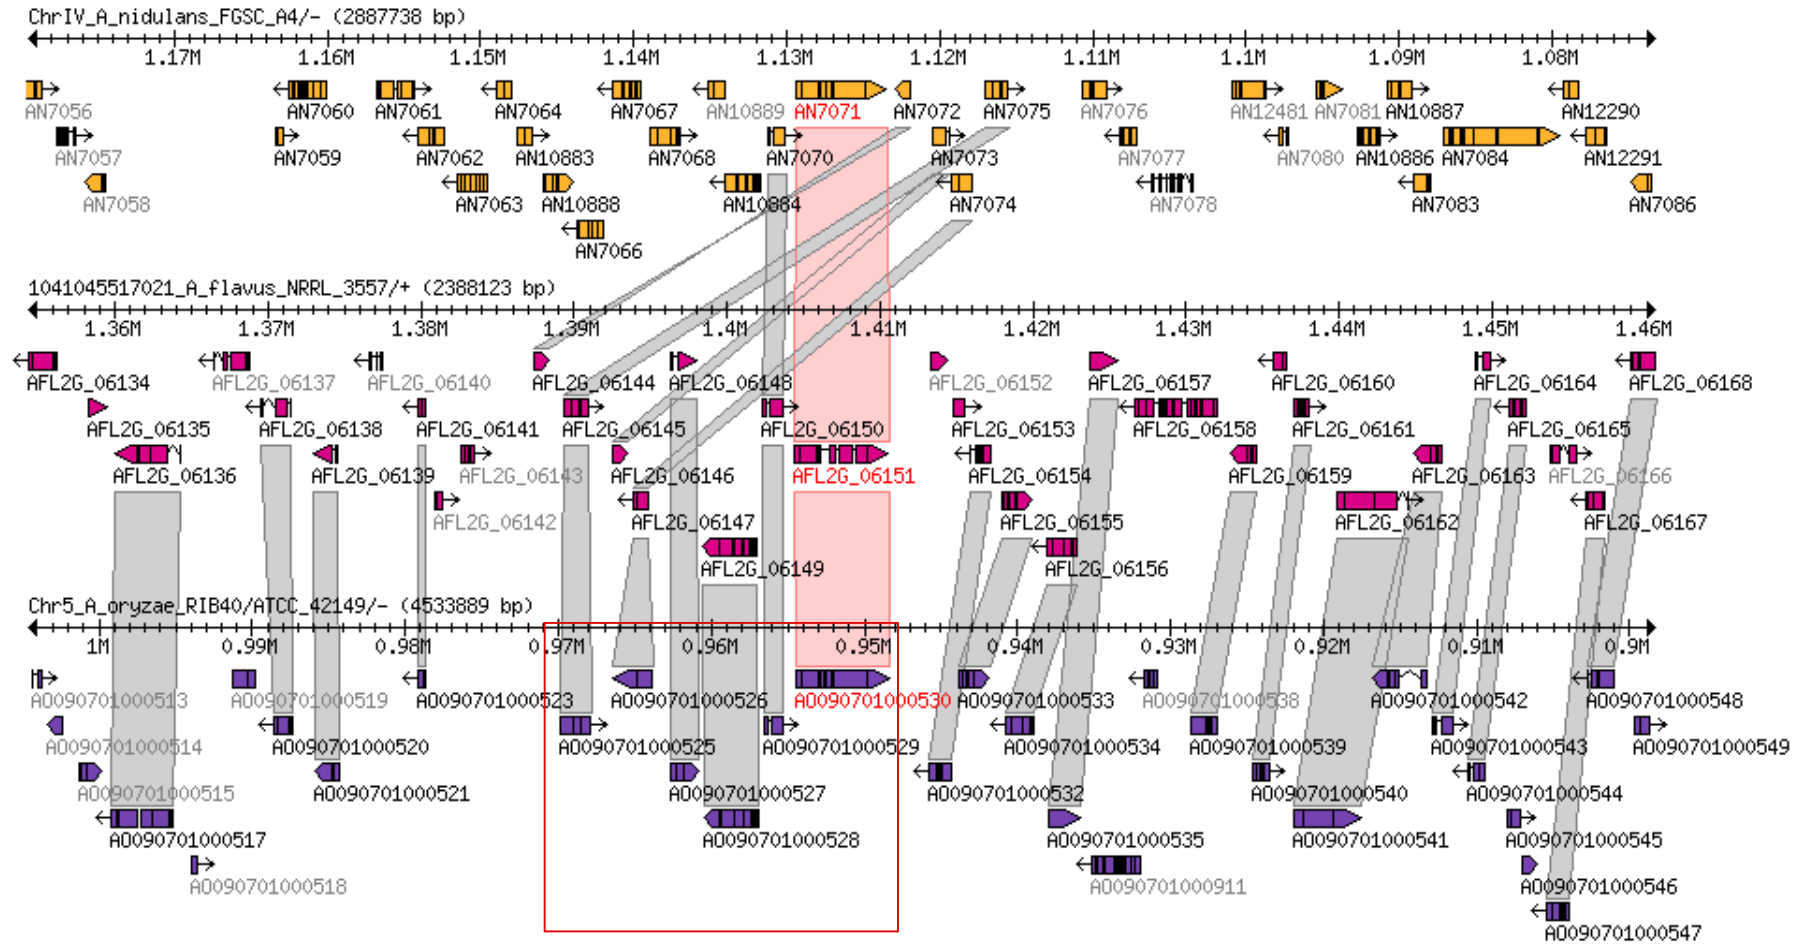

**AO090701000530 cluster**

| Gene id (SMURF)       | Gene positions | Gene distance | Gene Name | Annotated_gene_function                                                                                                                                                                                                                                  | antiSMASH ID | AspGD ID                |
|-----------------------|----------------|---------------|-----------|----------------------------------------------------------------------------------------------------------------------------------------------------------------------------------------------------------------------------------------------------------|--------------|-------------------------|
| AO090701000525        | -5             | 2955          |           | Domain(s) with predicted UDP-N-acetylmuramate dehydrogenase activity, flavin adenine dinucleotide binding activity and role in oxidation-reduction process                                                                                               | prot_ID_845  | AO090701000525 ECS, IGD |
| AO090701000526        | -4             | 1489          |           | Domain(s) with predicted nucleotide binding, oxidoreductase activity and role in oxidation-reduction process                                                                                                                                             | prot_ID_644  | AO090701000526          |
| AO090701000527        | -3             | 473           |           | Domain(s) with predicted choline dehydrogenase activity, flavin adenine dinucleotide binding activity and role in alcohol metabolic process, oxidation-reduction process                                                                                 | prot_ID_1070 | AO090701000527          |
| AO090701000528        | -2             | 424           |           | Domain(s) with predicted O-methyltransferase activity, monooxygenase activity and role in oxidation-reduction process                                                                                                                                    | prot_ID_238  | AO090701000528          |
| AO090701000529        | -1             | 776           |           | Ortholog(s) have role in asperthecin biosynthetic process, monodictyphenone biosynthetic process                                                                                                                                                         | prot_ID_524  | AO090701000529          |
| <b>AO090701000530</b> | 0              | 0             |           | <b>Polyketide synthase</b><br>Ortholog of A. nidulans FGSC A4 : AN3303, AN3348, AN2044, AN8727, A. fumigatus Af293 : Afu4g10080, Afu7g00420, Afu4g01242 and A. niger CBS 513.88 : An02g09530, An03g00420, An16g01900, An16g06080, An04g06980, An03g00215 | prot_ID_692  | AO090701000530 ECS, IGD |
| AO090701000532        | 1              | 2686          |           | Domain(s) with predicted amino acid transmembrane transporter activity, role in amino acid transmembrane transport and integral to membrane localization                                                                                                 | prot_ID_474  | AO090701000532          |
| AO090701000533        | 2              | 692           |           | Domain(s) with predicted role in transmembrane transport and integral to membrane localization                                                                                                                                                           | prot_ID_1325 | AO090701000533          |
| AO090701000534        | 3              | 1389          |           | Ortholog of N. fischeri NRRL 181 : NFIA_047410 and A. flavus NRRL 3357 : AFL2T_06157                                                                                                                                                                     | prot_ID_669  | AO090701000534          |
| AO090701000535        | 4              | 926           |           | Domain(s) with predicted ATP binding, ATPase activity, coupled to transmembrane movement of substances activity, role in transmembrane transport and integral to membrane localization                                                                   | prot_ID_1174 | AO090701000535          |
| AO090701000911        | 5              | 1078          |           | Domain(s) with predicted ATP binding, ATPase activity, coupled to transmembrane movement of substances activity, role in transmembrane transport and integral to membrane localization                                                                   | prot_ID_1462 | AO090701000911          |
| AO090701000538        | 6              | 271           |           | Ortholog of A. flavus NRRL 3357 : AFL2T_06159                                                                                                                                                                                                            | prot_ID_1085 | AO090701000538          |
| AO090701000539        | 7              | 2108          |           | Ortholog of A. niger CBS 513.88 : An01g05270, A. brasiliensis : Aspbr1_0052930, A. flavus NRRL 3357 : AFL2T_06161 and Neosartorya fischeri NRRL 181 : NFIA_057820                                                                                        | prot_ID_127  | AO090701000539          |
| AO090701000540        | 8              | 2328          |           | Ortholog of A. fumigatus Af293 : Afu7g00550, A. niger CBS 513.88 : An15g05630, An11g03460, An04g03850, An09g00640, A. oryzae RIB40 : AO090038000448 and A. niger ATCC 1015 : 118837-mRNA                                                                 | n/a          | AO090701000540          |
| AO090701000541        | 9              | 2041          |           |                                                                                                                                                                                                                                                          | n/a          | AO090701000541          |

|                |    |     |                                                                                                                                                                                                                  |     |                |
|----------------|----|-----|------------------------------------------------------------------------------------------------------------------------------------------------------------------------------------------------------------------|-----|----------------|
| AO090701000542 | 10 | 936 | Ortholog of <i>A. nidulans</i> FGSC A4 : AN1433, <i>A. fumigatus</i> Af293 : Afu1g01310, Afu8g04210, <i>A. niger</i> CBS 513.88 : An16g08870, An08g11860, An13g01880 and <i>A. oryzae</i> RIB40 : AO090103000036 | n/a | AO090701000542 |
| AO090701000543 | 11 | 695 | 60S ribosomal protein L26; predominantly expressed in the hyphal tip region                                                                                                                                      | n/a | AO090701000543 |

## A0090701000600 cluster

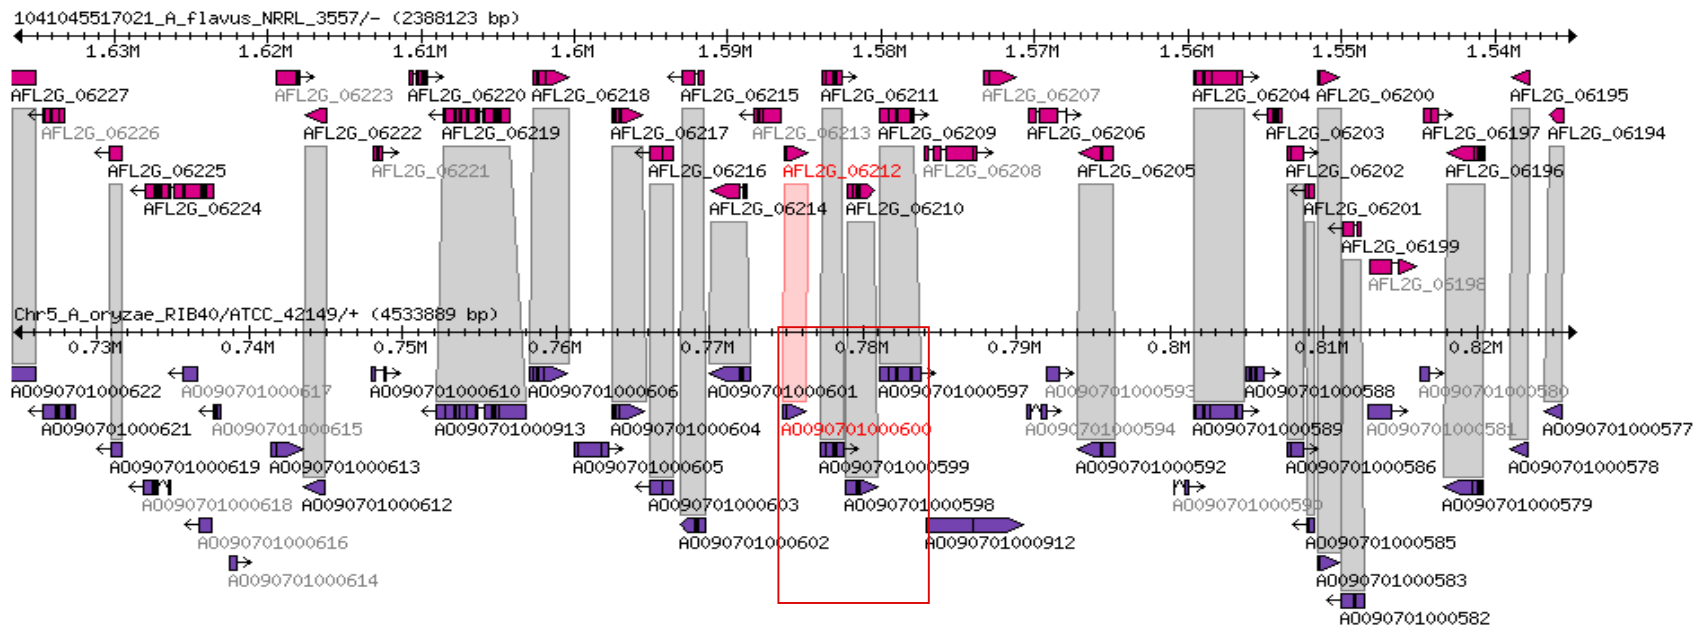

**AO090701000600 cluster**

| Gene id (SMURF)       | Gene positions | Gene distance | Gene Name | Annotated_gene_function                                                                                                                                                  | antiSMASH ID | AspGD ID                |
|-----------------------|----------------|---------------|-----------|--------------------------------------------------------------------------------------------------------------------------------------------------------------------------|--------------|-------------------------|
| n/a                   |                |               |           | Ortholog of A. versicolor : Aspve1_0889539, A. sydowii : Aspsy1_0033360 and A. terreus NIH2624 : ATET_06888                                                              | prot_ID_1465 | AO090701000912          |
| n/a                   |                |               |           | Ortholog(s) have glutamine-tRNA ligase activity, role in glutaminyl-tRNA aminoacylation and cytosol, mitochondrion localization                                          | prot_ID_964  | AO090701000597 ECS      |
| n/a                   |                |               |           | Domain(s) with predicted catalytic activity and role in metabolic process                                                                                                | prot_ID_1282 | AO090701000598          |
| n/a                   |                |               |           | Ortholog of A. nidulans FGSC A4 : AN6413, AN8328, AN3395, AN3241, AN10369, AN1930, AN2386, AN1738, AN9266, AN10886, AN7232, AN7406, AN7774, AN12202                      | prot_ID_762  | AO090701000599          |
| <b>AO090701000600</b> | 0              | 0             |           | <b>Dimethylallyl tryptophan synthase (DMAT)</b>                                                                                                                          | prot_ID_1351 | AO090701000600 ECS, IGD |
| AO090701000601        | 1              | 2498          |           | Cytochrome P450 monooxygenase; predicted phenylalanine ammonia-lyase                                                                                                     | prot_ID_529  | AO090701000601          |
| AO090701000602        | 2              | 486           |           | Ortholog of A. nidulans FGSC A4 : AN8025, A. fumigatus Af293 : Afu1g01450, A. niger CBS 513.88 : An11g08050, An05g01890, An11g03950 and A. oryzae RIB40 : AO090010000064 | prot_ID_879  | AO090701000602          |
| AO090701000603        | 3              | 648           |           | Domain(s) with predicted UDP-N-acetylmuramate dehydrogenase activity, flavin adenine dinucleotide binding activity and role in oxidation-reduction process               | prot_ID_1355 | AO090701000603          |
| n/a                   |                |               |           | ESCRT-I complex component                                                                                                                                                | prot_ID_1044 | AO090701000604          |

## AO090701000826 cluster

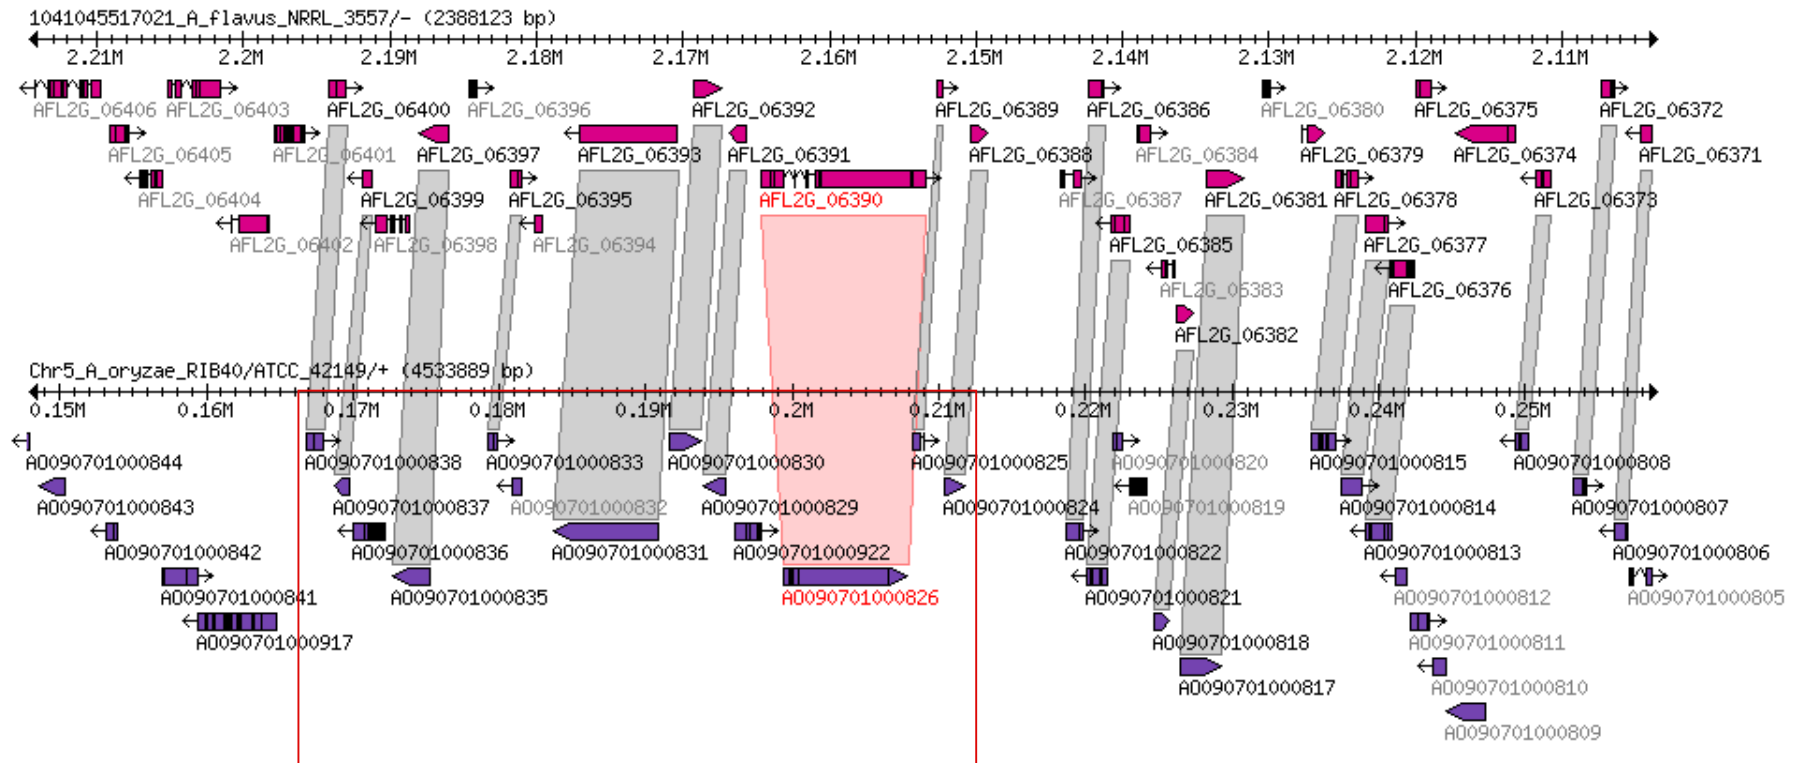

**AO090701000826 cluster**

| Gene id (SMURF)       | Gene positions | Gene distance | Gene Name | Annotated_gene_function                                                                                                                                                                                                         | antiSMASH ID | AspGD ID         |
|-----------------------|----------------|---------------|-----------|---------------------------------------------------------------------------------------------------------------------------------------------------------------------------------------------------------------------------------|--------------|------------------|
| n/a                   |                |               |           | Ortholog of A. fumigatus Af293 : Afu1g00220, A. niger CBS 513.88 : An08g08350, A. oryzae RIB40 : AO090138000179 and A. brasiliensis : Aspbr1_0027476, Aspbr1_0502994                                                            | prot_ID_1004 | AO090701000817   |
| n/a                   |                |               |           | Domain(s) with predicted nucleotide binding, oxidoreductase activity, zinc ion binding activity and role in oxidation-reduction process                                                                                         | prot_ID_1022 | AO090701000818   |
| n/a                   |                |               |           | Domain(s) with predicted oxidoreductase activity and role in oxidation-reduction process                                                                                                                                        | prot_ID_1    | AO090701000819   |
| n/a                   |                |               |           | Protein of unknown function                                                                                                                                                                                                     | prot_ID_1250 | AO090701000820   |
| n/a                   |                |               |           | domain(s) with predicted nucleotide binding, oxidoreductase activity, transferase activity, transferring acyl groups other than amino-acyl groups, zinc ion binding activity and role in oxidation-reduction process            | prot_ID_162  | AO090701000821   |
| n/a                   |                |               |           | Domain(s) with predicted nucleotide binding, oxidoreductase activity, zinc ion binding activity and role in oxidation-reduction process                                                                                         | prot_ID_1415 | AO090701000822   |
| n/a                   |                |               |           | Domain(s) with predicted oxidoreductase activity, sequence-specific DNA binding transcription factor activity, role in oxidation-reduction process, regulation of transcription, DNA-dependent and intracellular localization   | prot_ID_556  | AO090701000824   |
| n/a                   |                |               |           | Ortholog of A. flavus NRRL 3357 : AFL2T_06389                                                                                                                                                                                   | prot_ID_1377 | AO090701000825   |
|                       |                |               |           | Polyketide synthase; ortholog(s) have role in sterigmatocystin biosynthesis; positively regulated by XlnR; 1 putative XlnR binding site in the promoter                                                                         | prot_ID_1053 | AO090701000826   |
| <b>AO090701000826</b> | 0              | 0             |           | Protein of unknown function; positively regulated by XlnR; 6 putative XlnR binding sites in the promoter; ortholog(s) have role in secondary metabolism                                                                         | prot_ID_1448 | AO090701000828.1 |
| AO090701000922        | 1              | 1604          |           | Ortholog(s) have role in asperfuranone biosynthetic process                                                                                                                                                                     | prot_ID_1066 | AO090701000829   |
| AO090701000829        | 2              | 1139          |           | Domain(s) with predicted heme binding, iron ion binding, oxidoreductase activity, acting on paired donors, with oxidation of a pair of donors resulting in the reduction of molecular oxygen to two molecules of water activity | prot_ID_308  | AO090701000830   |
| AO090701000830        | 3              | 960           |           | Ortholog(s) have role in asperfuranone biosynthetic process, violaceol I biosynthetic process, violaceol II biosynthetic process                                                                                                | prot_ID_978  | AO090701000831   |
| AO090701000831        | 4              | 1086          |           | Protein of unknown function                                                                                                                                                                                                     | prot_ID_136  | AO090701000832   |
| AO090701000832        | 5              | 2392          |           | Domain(s) with predicted nucleotide binding, oxidoreductase activity and role in oxidation-reduction process                                                                                                                    | prot_ID_745  | AO090701000833   |
| AO090701000833        | 6              | 796           |           | Domain(s) with predicted transferase activity, transferring acyl groups activity and role in metabolic process                                                                                                                  | prot_ID_1280 | AO090701000835   |
| n/a                   |                |               |           | Domain(s) with predicted amino acid transmembrane transporter activity, role in amino acid transmembrane transport and membrane localization                                                                                    | prot_ID_431  | AO090701000836   |
| n/a                   |                |               |           | Domain(s) with predicted carbon-sulfur lyase activity and role in metabolic                                                                                                                                                     | prot_ID_1444 | AO090701000837   |

process

|     |                                                                                                                                                                                        |              |                |     |
|-----|----------------------------------------------------------------------------------------------------------------------------------------------------------------------------------------|--------------|----------------|-----|
| n/a | Domain(s) with predicted hydrolase activity, hydrolyzing O-glycosyl compounds activity and role in carbohydrate metabolic process                                                      | prot_ID_936  | AO090701000838 | ECS |
| n/a | Domain(s) with predicted ATP binding, ATPase activity, coupled to transmembrane movement of substances activity, role in transmembrane transport and integral to membrane localization | prot_ID_1454 | AO090701000917 |     |



# Non-PKS/NRPS backbone 1

No manual prediction made

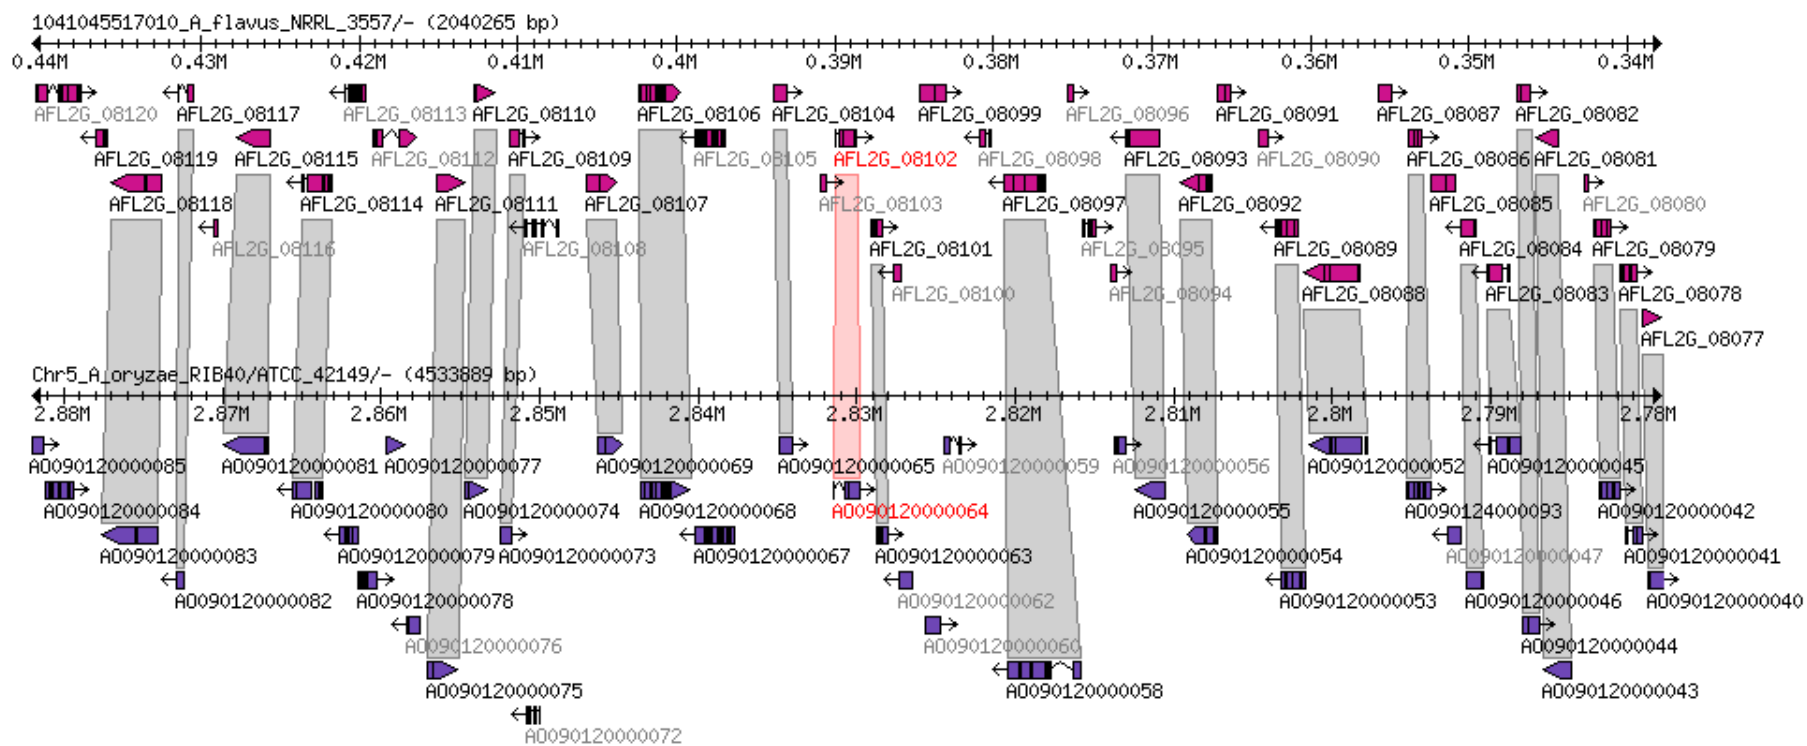

**Non-PKS/NRPS cluster 1**

| Gene id (SMURF) | Gene positions | Gene distance | Gene Name | Annotated_gene_function                                                                                                                                                                                                                    | antiSMASH ID | AspGD ID       |
|-----------------|----------------|---------------|-----------|--------------------------------------------------------------------------------------------------------------------------------------------------------------------------------------------------------------------------------------------|--------------|----------------|
| n/a             |                |               |           | Domain(s) with predicted catalytic activity                                                                                                                                                                                                | prot_ID_814  | AO090120000058 |
| n/a             |                |               |           | Protein of unknown function                                                                                                                                                                                                                | prot_ID_102  | AO090120000059 |
| n/a             |                |               |           | Protein of unknown function                                                                                                                                                                                                                | prot_ID_712  | AO090120000060 |
| n/a             |                |               |           | Protein of unknown function                                                                                                                                                                                                                | prot_ID_908  | AO090120000062 |
| n/a             |                |               |           | Domain(s) with predicted electron carrier activity, heme binding, iron ion binding, oxidoreductase activity, acting on paired donors, with incorporation or reduction of molecular oxygen activity and role in oxidation-reduction process | prot_ID_1080 | AO090120000063 |
| n/a             |                |               |           | Geranylgeranyl pyrophosphate synthase                                                                                                                                                                                                      | prot_ID_1164 | AO090120000064 |
| n/a             |                |               |           | Domain(s) with predicted ATP binding, transferase activity, transferring phosphorus-containing groups activity                                                                                                                             | prot_ID_336  | AO090120000065 |
| n/a             |                |               | CYP551A2  | Cytochrome P450 monooxygenase                                                                                                                                                                                                              | prot_ID_1281 | AO090120000067 |
| n/a             |                |               | catB      | Catalase with a predicted role in hydrogen peroxide detoxification; expression is induced under hydrogen peroxide treatment; putative heat shock element and a CCAAT-box is involved in high levels of expression                          | prot_ID_627  | AO090120000068 |

## Non-PKS/NRPS backbone 2

No manual prediction made

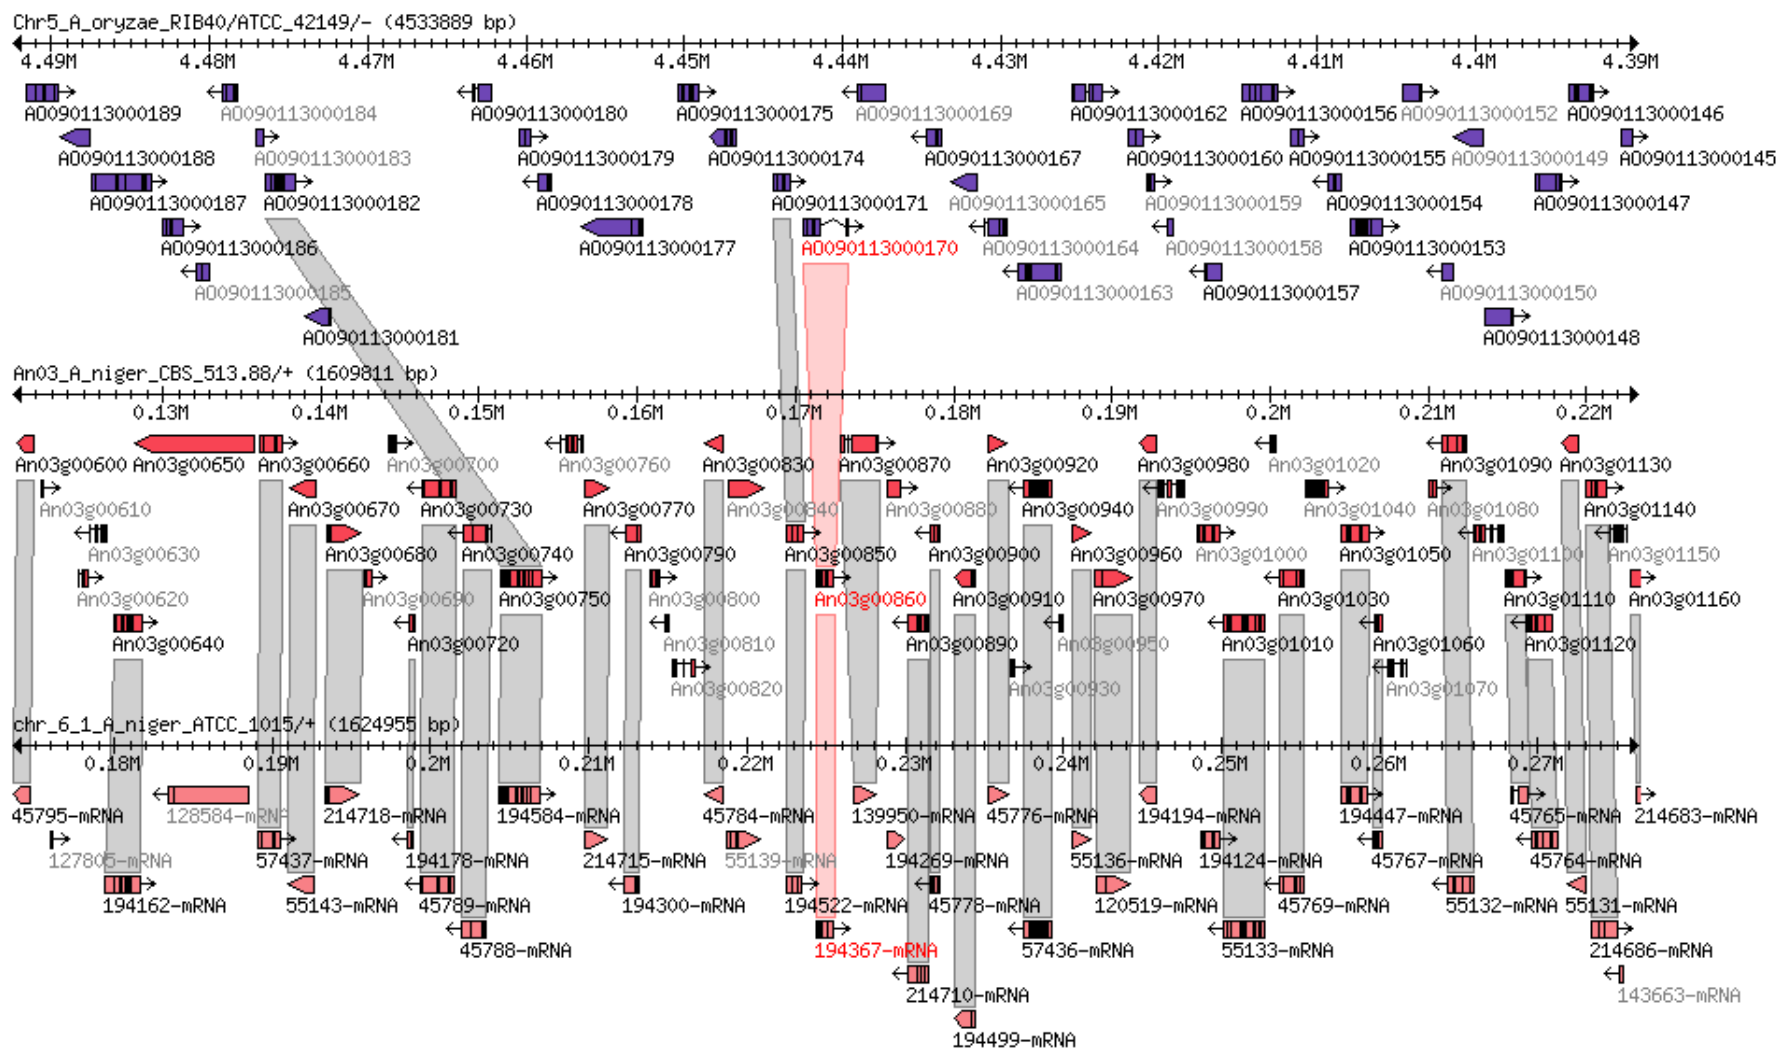

**Non-PKS/NRPS cluster 2**

| Gene id (SMURF) | Gene positions | Gene distance | Gene Name | Annotated_gene_function                                                                                                                                                                                        | antiSMASH ID | AspGD ID       |
|-----------------|----------------|---------------|-----------|----------------------------------------------------------------------------------------------------------------------------------------------------------------------------------------------------------------|--------------|----------------|
| n/a             |                |               |           | Domain(s) with predicted sequence-specific DNA binding RNA polymerase II transcription factor activity, zinc ion binding activity, role in regulation of transcription, DNA-dependent and nucleus localization | prot_ID_294  | AO090113000164 |
| n/a             |                |               |           | Protein of unknown function                                                                                                                                                                                    | prot_ID_927  | AO090113000165 |
| n/a             |                |               |           | Domain(s) with predicted nucleotide binding activity                                                                                                                                                           | prot_ID_765  | AO090113000167 |
| n/a             |                |               |           | Domain(s) with predicted DNA binding, zinc ion binding activity, role in transcription, DNA-dependent and nucleus localization                                                                                 | prot_ID_403  | AO090113000169 |
| n/a             |                |               |           | Domain(s) with predicted role in isoprenoid biosynthetic process                                                                                                                                               | prot_ID_408  | AO090113000170 |
| n/a             |                |               |           | Domain(s) with predicted role in isoprenoid biosynthetic process                                                                                                                                               | prot_ID_246  | AO090113000171 |
| n/a             |                |               |           | Ortholog(s) have role in austinol biosynthetic process, dehydroaustinol biosynthetic process                                                                                                                   | prot_ID_853  | AO090113000174 |
| n/a             |                |               |           | Ortholog of A. nidulans FGSC A4 : AN8943, A. fumigatus Af293 : Afu2g00900, Afu6g11560, A. niger CBS 513.88 : An01g11690, An05g02420, An03g01300 and A. oryzae RIB40 : AO090023000422                           | prot_ID_45   | AO090113000175 |

Abbreviations: ECS, end of cluster syntenly; IGD, increase in intergenic distance; FA, change in functional annotation; ED, experimentally determined
